# Supplementary material for: Deep Transcriptome Sequencing of Wild Halophyte Rice, Porteresia coarctata, Provides Novel Insights into the Salinity and Submergence Tolerance Factors
Source: PubMed Central journal article supplement — DNA Res. 2013 Oct 8;21(1):69–84. doi: 10.1093/dnares/dst042 (PMC3925395; doi:10.1093/dnares/dst042), 2013-10-08
Supplement: supp_dst042_dst042supp_table4.pdf [file supp_dst042_dst042supp_table4.pdf]

**Table S4** List of differentially expressed genes under different stress conditions.

| Transcript ID | Salt 450         |         |            | Salt 700         |           |            | Submergence      |         |            | Salt 450+Submergence |         |            | Gene description                                                           | TF family |
|---------------|------------------|---------|------------|------------------|-----------|------------|------------------|---------|------------|----------------------|---------|------------|----------------------------------------------------------------------------|-----------|
|               | log2 fold change | p-value | Regulation | log2 fold change | p-value   | Regulation | log2 fold change | p-value | Regulation | log2 fold change     | p-value | Regulation |                                                                            |           |
| Pc_TC000011   | 1.66             | 0.72    |            | 4.31             | 0.02      | Up         | 2.96             | 0.28    |            | 1.63                 | 0.71    |            | OSINBa0070M12.15 protein                                                   |           |
| Pc_TC000060   | 1.04             | 0.14    |            | 1.47             | 0.06      |            | 2.2              | 0.05    | Up         | 1.09                 | 0.18    |            | ACT-like protein tyrosine kinase family protein                            |           |
| Pc_TC000081   | 2.3              | 0.04    | Up         | 2.38             | 0.05      |            | 1.83             | 0.26    |            | 2.21                 | 0.07    |            | DNA/RNA polymerases superfamily protein                                    |           |
| Pc_TC000122   | 0.39             | 0.2     |            | 0.7              | 0.07      |            | -2.56            | 0       | Down       | -1.7                 | 0       | Down       | Transducin/WD40 repeat-like superfamily protein                            |           |
| Pc_TC000148   | -2.55            | 0.02    | Down       | -0.99            | 0.37      |            | -0.45            | 0.75    |            | -0.94                | 0.37    |            | cysteine-rich RLK (RECEPTOR-like protein kinase) 8                         |           |
| Pc_TC000153   | 0.47             | 0.21    |            | 0.51             | 0.28      |            | -3.44            | 0       | Down       | -1.39                | 0.02    | Down       | G-box binding factor 3                                                     | bZIP      |
| Pc_TC000164   | -0.02            | 0.99    |            | -0.27            | 0.72      |            | -3.55            | 0.01    | Down       | -2.13                | 0.01    | Down       | Expressed protein                                                          |           |
| Pc_TC000180   | -1.26            | 0.04    | Down       | -0.02            | 0.99      |            | 0.82             | 0.42    |            | 0.04                 | 0.96    |            | cysteine-rich RLK (RECEPTOR-like protein kinase) 8                         |           |
| Pc_TC000201   | 0.4              | 0.58    |            | 1.5              | 0.04      | Up         | -0.42            | 0.73    |            | -0.19                | 0.84    |            | cysteine-rich RLK (RECEPTOR-like protein kinase) 8                         |           |
| Pc_TC000210   | -0.84            | 0.16    |            | -1.78            | 0.02      | Down       | 1.3              | 0.19    |            | 0.95                 | 0.15    |            | RNA-directed DNA polymerase (reverse transcriptase)-related family protein |           |
| Pc_TC000220   | 0.09             | 0.83    |            | 1.25             | 0.01      | Up         | -1.63            | 0.1     |            | -1                   | 0.1     |            | Putative uncharacterized protein Sb06g016046 (Fragment)                    |           |
| Pc_TC000228   | -1.15            | 0.03    | Down       | -0.09            | 0.89      |            | 0.72             | 0.46    |            | -0.35                | 0.59    |            | Putative uncharacterized protein                                           |           |
| Pc_TC000237   | -0.25            | 0.71    |            | 0.03             | 0.98      |            | -0.46            | 0.68    |            | -1.63                | 0.04    | Down       | Expressed protein                                                          |           |
| Pc_TC000246   | -1.22            | 0.03    | Down       | -1.16            | 0.09      |            | -0.08            | 0.94    |            | 0.32                 | 0.63    |            | actin-related protein 9                                                    |           |
| Pc_TC000266   | -0.27            | 0.61    |            | -0.14            | 0.83      |            | 1.86             | 0.05    |            | 1.48                 | 0.02    | Up         | Putative polyprotein                                                       |           |
| Pc_TC000271   | 0.42             | 0.38    |            | 1.09             | 0.05      |            | -2.72            | 0.01    | Down       | -2.2                 | 0       | Down       | cysteine-rich RLK (RECEPTOR-like protein kinase) 8                         |           |
| Pc_TC000278   | 0.43             | 0.37    |            | 0.83             | 0.14      |            | -3.34            | 0       | Down       | -1.71                | 0.01    | Down       | Putative polyprotein                                                       |           |
| Pc_TC000290   | 0.1              | 0.83    |            | 1.24             | 0.02      | Up         | -1.9             | 0.06    |            | -0.95                | 0.13    |            | protein,putative,unclassified                                              |           |
| Pc_TC000291   | -0.19            | 0.74    |            | 1.36             | 0.03      | Up         | -2.76            | 0.02    | Down       | -1.01                | 0.16    |            | Expressed protein                                                          |           |
| Pc_TC000329   | 0.35             | 0.55    |            | 0.67             | 0.31      |            | -2.8             | 0.02    | Down       | -2.44                | 0       | Down       | cysteine-rich RLK (RECEPTOR-like protein kinase) 8                         |           |
| Pc_TC000357   | 0.59             | 0.22    |            | 1.2              | 0.03      | Up         | -2.54            | 0.02    | Down       | -1.56                | 0.02    | Down       | guanyl-nucleotide exchange factors;GTPase binding;GTP binding              |           |
| Pc_TC000403   | -0.16            | 0.88    |            | 2.12             | 0.01      | Up         | 0.03             | 1       |            | -0.11                | 0.93    |            | gag protein                                                                |           |
| Pc_TC000412   | -0.01            | 1       |            | 0.87             | 0.44      |            | -4.5             | 0.04    | Down       | -0.05                | 1       |            | Expressed protein                                                          |           |
| Pc_TC000421   | 0.27             | 0.86    |            | 1.95             | 0.05      | Up         | 0.28             | 0.89    |            | -0.09                | 1       |            | Expressed protein                                                          |           |
| Pc_TC000464   | 2.12             | 0       | Up         | 2.37             | 0         | Up         | -1.91            | 0.14    |            | 0.45                 | 0.6     |            | OSINBa0035I04.5 protein                                                    |           |
| Pc_TC000490   | -2.8             | 0.04    | Down       | -0.4             | 0.76      |            | -0.56            | 0.71    |            | -0.59                | 0.62    |            | DNA/RNA polymerases superfamily protein                                    |           |
| Pc_TC000535   | -0.81            | 0.22    |            | -0.22            | 0.78      |            | 1.76             | 0.09    |            | 1.42                 | 0.04    | Up         | Eukaryotic aspartyl protease family protein                                |           |
| Pc_TC000538   | 3.26             | #####   | Up         | 0                | 1.02E-005 |            | 1.04             | 0.35    |            | 2.09                 | 0       | Up         | Glycosyl hydrolase family protein with chitinase insertion domain          |           |
| Pc_TC000539   | 2.95             | #####   | Up         | 0                | 6.30E-005 |            | 2.34             | 0.03    | Up         | 2.4                  | 0       | Up         | Glycosyl hydrolase family protein with chitinase insertion domain          |           |
| Pc_TC000551   | 0.99             | 0.29    |            | 1.88             | 0.05      | Up         | 2.31             | 0.06    |            | 1.6                  | 0.09    |            | Expressed protein                                                          |           |
| Pc_TC000555   | -0.17            | 0.87    |            | 1.62             | 0.04      | Up         | 0.68             | 0.57    |            | 0.51                 | 0.57    |            | Uncharacterized protein                                                    |           |
| Pc_TC000558   | -1.36            | 0.12    |            | -3.88            | 0         | Down       | 1.18             | 0.3     |            | -0.25                | 0.79    |            | Expressed protein                                                          |           |
| Pc_TC000576   | -0.28            | 0.55    |            | -0.18            | 0.76      |            | 2.89             | 0       | Up         | 1.9                  | 0       | Up         | serine carboxypeptidase-like 18                                            |           |
| Pc_TC000577   | -0.19            | 0.73    |            | 0.35             | 0.58      |            | 2.63             | 0.01    | Up         | 1.55                 | 0.01    | Up         | serine carboxypeptidase-like 19                                            |           |
| Pc_TC000581   | -1.35            | 0.03    | Down       | -0.27            | 0.7       |            | -0.2             | 0.85    |            | 0.16                 | 0.83    |            | Expressed protein                                                          |           |
| Pc_TC000582   | 0.95             | 0.54    |            | 1.28             | 0.4       |            | 1.24             | 0.48    |            | 2.99                 | 0.01    | Up         | Uncharacterized protein                                                    |           |
| Pc_TC000588   | -1.25            | 0.01    | Down       | -0.55            | 0.33      |            | 0.15             | 0.88    |            | -0.18                | 0.76    |            | structural maintenance of chromosomes 6A                                   |           |
| Pc_TC000589   | 0.85             | 0.26    |            | 0.96             | 0.26      |            | 1.15             | 0.32    |            | 1.61                 | 0.05    | Up         | Expressed protein                                                          |           |
| Pc_TC000593   | -1.86            | 0       | Down       | 0.46             | 0.37      |            | -0.84            | 0.38    |            | -1.28                | 0.04    | Down       | Uncharacterized protein                                                    |           |
| Pc_TC000605   | 1.4              | 0.4     |            | 2.38             | 0.1       |            | 3.23             | 0.04    | Up         | 1.43                 | 0.39    |            | Xanthine/uracil permease family protein                                    |           |
| Pc_TC000610   | -0.9             | 0.15    |            | -0.43            | 0.55      |            | 2.21             | 0.03    | Up         | 1.16                 | 0.08    |            | MATE efflux family protein                                                 |           |
| Pc_TC000611   | -0.57            | 0.18    |            | -1.83            | 0         | Down       | 0.64             | 0.48    |            | -0.16                | 0.78    |            | zinc induced facilitator-like 1                                            |           |
| Pc_TC000621   | -2.08            | 0       | Down       | -2.33            | 0         | Down       | -1.57            | 0.14    |            | -1.91                | 0.01    | Down       | Putative uncharacterized protein                                           |           |
| Pc_TC000622   | -1.83            | 0       | Down       | -1.77            | 0.01      | Down       | -2.69            | 0.02    | Down       | -2.32                | 0       | Down       | Os05g0432600 protein                                                       |           |
| Pc_TC000627   | 3                | 0.01    | Up         | -0.26            | 1         |            | 0.99             | 0.63    |            | 0.3                  | 0.97    |            | Expressed protein                                                          |           |
| Pc_TC000638   | -1.31            | 0.09    |            | -2.22            | 0.02      | Down       | -2.67            | 0.04    | Down       | -2.65                | 0.01    | Down       | ABC2 homolog 6                                                             |           |
| Pc_TC000662   | 1.24             | #####   | Up         | 1.08             | 0.01      | Up         | -0.29            | 0.73    |            | 0.71                 | 0.15    |            | sucrose synthase 4                                                         |           |
| Pc_TC000668   | 0.8              | 0.03    |            | 0.16             | 0.75      |            | -1.52            | 0.11    |            | -1.3                 | 0.03    | Down       | Protein kinase superfamily protein                                         |           |
| Pc_TC000669   | 0.18             | 0.56    |            | 0.28             | 0.48      |            | -1.99            | 0.02    | Down       | -1.55                | 0       | Down       | Protein kinase superfamily protein                                         |           |
| Pc_TC000681   | -1.16            | 0.03    | Down       | 1.09             | 0.05      | Up         | -3.44            | 0       | Down       | -0.76                | 0.24    |            | Chromosome III,complete sequence                                           |           |
| Pc_TC000682   | -0.57            | 0.49    |            | 2.07             | 0         | Up         | -4.47            | 0       | Down       | -0.47                | 0.61    |            | Predicted protein (Fragment)                                               |           |
| Pc_TC000683   | -1.32            | 0.08    |            | 1.84             | 0.01      | Up         | -3.06            | 0.02    | Down       | -0.82                | 0.32    |            | Putative uncharacterized protein                                           |           |
| Pc_TC000684   | -0.34            | 0.8     |            | 1.8              | 0.05      | Up         | 0                | 0.01    |            | 0                    | 1       |            | sequence-specific DNA binding transcription factors;zinc ion binding       |           |
| Pc_TC000699   | 0.23             | 0.68    |            | -0.52            | 0.44      |            | -1.33            | 0.21    |            | -2.61                | 0       | Down       | Uncharacterized protein                                                    |           |
| Pc_TC000712   | -1.4             | 0.05    | Down       | 0.01             | 1         |            | -0.16            | 0.89    |            | -0.77                | 0.32    |            | Transposable element protein,putative,MuDR                                 |           |
| Pc_TC000717   | -1.53            | 0.07    |            | -4.72            | 0         | Down       | -2.96            | 0.03    | Down       | -3.35                | 0       | Down       | Expressed protein                                                          |           |
| Pc_TC000719   | 1.11             | 0.11    |            | 0.61             | 0.49      |            | 1.41             | 0.22    |            | 1.58                 | 0.05    | Up         | Uncharacterized protein                                                    |           |

|             |       |       |      |       |           |      |       |           |      |       |       |      |                                                                          |
|-------------|-------|-------|------|-------|-----------|------|-------|-----------|------|-------|-------|------|--------------------------------------------------------------------------|
| Pc_TC000721 | 2.16  | ##### | Up   | 0     | 2.63E-007 |      | 2.57  | 0.01      | Up   | 1.2   | 0.09  |      | Serine protease inhibitor 28                                             |
| Pc_TC000722 | 2.73  | ##### | Up   | 0     | 0         |      | 3.6   | 0         | Up   | 1.47  | 0.08  |      | Uncharacterized protein                                                  |
| Pc_TC000743 | 0.42  | 0.15  |      | -0.41 | 0.29      |      | 1.81  | 0.03      | Up   | 1.58  | 0     | Up   | Leucine-rich repeat transmembrane protein kinase                         |
| Pc_TC000772 | 0.46  | 0.13  |      | 0.64  | 0.08      |      | -4.21 | 8.21E-006 | Down | -1.88 | 0     | Down | Uncharacterized protein (Fragment)                                       |
| Pc_TC000781 | -0.9  | 0.2   |      | -2.23 | 0.01      | Down | 0.55  | 0.61      |      | 0.04  | 0.97  |      | Expressed protein                                                        |
| Pc_TC000792 | 0.4   | 0.41  |      | 0.61  | 0.29      |      | -3.24 | 0         | Down | -1.64 | 0.02  | Down | alpha/beta-Hydrolases superfamily protein                                |
| Pc_TC000794 | 1.06  | 0.05  | Up   | 1     | 0.12      |      | 0.33  | 0.76      |      | 0.59  | 0.39  |      | alpha/beta-Hydrolases superfamily protein                                |
| Pc_TC000820 | 0.15  | 0.75  |      | 0.7   | 0.2       |      | -1.37 | 0.17      |      | -1.42 | 0.03  | Down | Armadillo/beta-catenin repeat protein-like                               |
| Pc_TC000830 | 0.68  | 0.02  |      | 1.63  | 1.93E-005 | Up   | -3.47 | 0         | Down | -1.57 | 0     | Down | Late embryogenesis abundant protein (LEA) family protein                 |
| Pc_TC000832 | -0.38 | 0.69  |      | 0.37  | 0.71      |      | -3.96 | 0.02      | Down | -0.46 | 0.65  |      | CONTAINS InterPro DOMAIN/s: E2F-associated phosphoprotein                |
| Pc_TC000836 | 0.63  | 0.4   |      | -2.78 | 0.02      | Down | 1.87  | 0.09      |      | 1.23  | 0.12  |      | Expressed protein                                                        |
| Pc_TC000862 | 0.48  | 0.32  |      | -1.38 | 0.04      | Down | -1.74 | 0.1       |      | -0.57 | 0.39  |      | NAD(P)-binding Rossmann-fold superfamily protein                         |
| Pc_TC000878 | -0.35 | 0.67  |      | -1.22 | 0.2       |      | 2.4   | 0.03      | Up   | -0.49 | 0.58  |      | Expressed protein                                                        |
| Pc_TC000879 | 1.25  | 0     | Up   | 0.19  | 0.68      |      | 0.31  | 0.72      |      | 0.81  | 0.12  |      | ChaC-like family protein                                                 |
| Pc_TC000884 | 0.14  | 0.93  |      | -0.15 | 0.94      |      | 3.36  | 0         | Up   | 2.68  | 0     | Up   | thiaminC                                                                 |
| Pc_TC000885 | 0.71  | 0.28  |      | 1.75  | 0.01      | Up   | -3.22 | 0.02      | Down | 0.57  | 0.47  |      | MAPK/ERK kinase kinase 1                                                 |
| Pc_TC000887 | -2.17 | 0.03  | Down | -2.38 | 0.04      | Down | -1.04 | 0.43      |      | -1.62 | 0.11  |      | MAPK/ERK kinase kinase 1                                                 |
| Pc_TC000895 | -0.02 | 0.95  |      | -0.91 | 0.07      |      | 1.83  | 0.04      | Up   | 0.93  | 0.08  |      | Putative uncharacterized protein                                         |
| Pc_TC000903 | -1.53 | 0.04  | Down | -1.02 | 0.23      |      | 0.85  | 0.44      |      | 0.45  | 0.56  |      | natural resistance-associated macrophage protein 1                       |
| Pc_TC000911 | -1.05 | 0.05  | Down | -0.16 | 0.8       |      | 1.08  | 0.26      |      | 0.27  | 0.67  |      | Uncharacterized protein                                                  |
| Pc_TC000912 | 0.82  | 0.47  |      | 3.06  | 0         | Up   | -4.08 | 0.08      |      | 0.13  | 0.98  |      | cysteine-rich RLK (RECEPTOR-like protein kinase) 8                       |
| Pc_TC000916 | 0.09  | 0.9   |      | 0.98  | 0.16      |      | -2.71 | 0.03      | Down | -1.55 | 0.06  |      | Putative uncharacterized protein                                         |
| Pc_TC000919 | -0.2  | 0.53  |      | 1.24  | 0         | Up   | -0.3  | 0.74      |      | -0.3  | 0.56  |      | unknown protein                                                          |
| Pc_TC000930 | -2.06 | 0.03  | Down | -0.45 | 0.65      |      | -4.37 | 0.01      | Down | -1.44 | 0.14  |      | Expressed protein                                                        |
| Pc_TC000940 | -0.35 | 0.55  |      | 1.91  | 0         | Up   | 0.83  | 0.41      |      | 0.49  | 0.47  |      | gigantea protein (GI)                                                    |
| Pc_TC000946 | -1.7  | 0.01  | Down | -2.59 | 0         | Down | 0.18  | 0.87      |      | -0.47 | 0.54  |      | Terpenoid cyclases/Protein prenyltransferases superfamily protein        |
| Pc_TC000960 | 0.56  | 0.08  |      | 1.04  | 0.01      | Up   | -0.77 | 0.36      |      | 0     | 1     |      | Histone superfamily protein                                              |
| Pc_TC000965 | 0.55  | 0.59  |      | -1.11 | 0.42      |      | 2.81  | 0.02      | Up   | 1.01  | 0.32  |      | Expressed protein                                                        |
| Pc_TC000970 | 0.65  | 0.03  |      | 0.75  | 0.05      |      | -1.77 | 0.04      | Down | -0.98 | 0.05  |      | plant glycogenin-like starch initiation protein 1                        |
| Pc_TC000971 | 0.35  | 0.25  |      | 0.48  | 0.21      |      | -1.65 | 0.05      |      | -1.15 | 0.02  | Down | Protein of unknown function (DUF1677)                                    |
| Pc_TC000995 | -1.35 | ##### | Down | -2.19 | 1.05E-007 | Down | 1.82  | 0.03      | Up   | 0.36  | 0.45  |      | magnesium-chelatase subunit chlH, chloroplast, putative                  |
| Pc_TC001020 | -0.85 | 0.02  |      | -1.68 | 0         | Down | 1.04  | 0.22      |      | 0.04  | 0.94  |      | Rhomboid-related intramembrane serine protease family protein            |
| Pc_TC001024 | 1.56  | 0.04  | Up   | 1.64  | 0.05      |      | 1.96  | 0.09      |      | 1.37  | 0.11  |      | Expressed protein                                                        |
| Pc_TC001037 | -0.12 | 0.74  |      | 0.46  | 0.32      |      | -2.92 | 0         | Down | -1.81 | 0     | Down | Expressed protein                                                        |
| Pc_TC001045 | 2.7   | ##### | Up   | 0     | 2.85E-006 |      | 1.99  | 0.06      |      | 0.79  | 0.3   |      | Uncharacterized protein                                                  |
| Pc_TC001062 | 0.93  | 0.06  |      | 1.32  | 0.02      | Up   | -1.36 | 0.2       |      | 0.03  | 0.97  |      | 12-oxophytodienoate reductase 2                                          |
| Pc_TC001064 | 1.69  | 0     | Up   | 0     | 4.76E-011 |      | 2.27  | 0.02      | Up   | -0.36 | 0.6   |      | alpha/beta-Hydrolases superfamily protein                                |
| Pc_TC001084 | 0.9   | 0.4   |      | 0.26  | 0.89      |      | 4.25  | 0         | Up   | 2.99  | 0     | Up   | Uncharacterized protein                                                  |
| Pc_TC001092 | 2.57  | 0.01  | Up   | 0     | 0.11      |      | 2.15  | 0.14      |      | 0.71  | 0.64  |      | Expressed protein                                                        |
| Pc_TC001093 | 1.92  | 0.01  | Up   | 0     | 0         |      | 1.99  | 0.1       |      | -0.13 | 0.94  |      | Prolamin                                                                 |
| Pc_TC001095 | 0.67  | 0.05  |      | -1.07 | 0.02      | Down | 0.77  | 0.37      |      | 1.32  | 0.01  | Up   | Terpenoid cyclases/Protein prenyltransferases superfamily protein        |
| Pc_TC001096 | 0.03  | 1     |      | -0.19 | 0.84      |      | -2.4  | 0.07      |      | -3.01 | 0     | Down | Prolamin                                                                 |
| Pc_TC001097 | -2.46 | 0.03  | Down | -3.8  | 0.01      | Down | -0.83 | 0.55      |      | -3.23 | 0.01  | Down | Prolamin                                                                 |
| Pc_TC001098 | 0.35  | 0.57  |      | 0.06  | 0.95      |      | -7.17 | 3.36E-005 | Down | -3.73 | ##### | Down | Expressed protein                                                        |
| Pc_TC001100 | 0.33  | 0.53  |      | 0.72  | 0.23      |      | -1.86 | 0.08      |      | -1.46 | 0.04  | Down | Expressed protein                                                        |
| Pc_TC001109 | -1.4  | ##### | Down | -0.48 | 0.25      |      | -0.97 | 0.25      |      | -1.05 | 0.04  | Down | starch branching enzyme 2.2                                              |
| Pc_TC001116 | -2.01 | 0     | Down | -0.58 | 0.42      |      | 1.6   | 0.11      |      | 0.35  | 0.62  |      | fatty acid reductase 1                                                   |
| Pc_TC001123 | -0.19 | 0.82  |      | -2.08 | 0.04      | Down | 0.86  | 0.45      |      | 0.64  | 0.43  |      | Expressed protein                                                        |
| Pc_TC001127 | 0.59  | 0.04  |      | 0.65  | 0.08      |      | -1.74 | 0.04      | Down | -0.32 | 0.51  |      | RNA-binding (RRM/RBD/RNP motifs) family protein                          |
| Pc_TC001128 | 0.24  | 0.48  |      | 0.72  | 0.09      |      | -1.77 | 0.05      | Down | -0.43 | 0.41  |      | Putative uncharacterized protein                                         |
| Pc_TC001132 | 0.35  | 0.44  |      | 0.64  | 0.24      |      | -0.86 | 0.38      |      | -2.28 | 0     | Down | early nodulin-related                                                    |
| Pc_TC001150 | 1.4   | 0.01  | Up   | 1.57  | 0.02      | Up   | 2.18  | 0.03      | Up   | 1.86  | 0.01  | Up   | Peptidase M28 family protein                                             |
| Pc_TC001167 | 0.59  | 0.11  |      | 1.2   | 0.01      | Up   | -1.16 | 0.2       |      | 0.15  | 0.79  |      | alpha/beta-Hydrolases superfamily protein                                |
| Pc_TC001181 | -2.57 | ##### | Down | -1.95 | 0.01      | Down | -0.01 | 1         |      | -0.92 | 0.19  |      | Uncharacterized protein                                                  |
| Pc_TC001193 | -0.46 | 0.27  |      | -0.54 | 0.31      |      | 1.81  | 0.04      | Up   | 0.98  | 0.07  |      | NAD(P)-binding Rossmann-fold superfamily protein                         |
| Pc_TC001198 | -3.24 | 0.03  | Down | 0.38  | 0.76      |      | -1.12 | 0.47      |      | -3.11 | 0.03  | Down | Uncharacterized protein                                                  |
| Pc_TC001215 | 2.54  | 0.02  | Up   | 1.47  | 0.31      |      | 3.03  | 0.04      | Up   | 2.43  | 0.04  | Up   | Expressed protein                                                        |
| Pc_TC001219 | 0.36  | 0.46  |      | 1.02  | 0.07      |      | -2.01 | 0.06      |      | -2.02 | 0     | Down | P-loop containing nucleoside triphosphate hydrolases superfamily protein |
| Pc_TC001239 | 0.43  | 0.2   |      | 0.49  | 0.25      |      | -3.24 | 0         | Down | -1.85 | 0     | Down | phloem protein 2-A13                                                     |
| Pc_TC001240 | 0.24  | 0.51  |      | 0.41  | 0.37      |      | -3.05 | 0         | Down | -1.92 | 0     | Down | phloem protein 2-A13                                                     |
| Pc_TC001249 | -1.43 | 0.04  | Down | -0.35 | 0.64      |      | -1.12 | 0.31      |      | -1.16 | 0.13  |      | Sulfite exporter TauE/SafE family protein                                |
| Pc_TC001253 | 0.15  | 0.66  |      | 0.58  | 0.18      |      | -2.49 | 0.01      | Down | -0.96 | 0.08  |      | soluble N-ethylmaleimide-sensitive factor adaptor protein 33             |

|             |       |       |      |       |           |      |       |           |      |       |       |      |                                                                                         |      |
|-------------|-------|-------|------|-------|-----------|------|-------|-----------|------|-------|-------|------|-----------------------------------------------------------------------------------------|------|
| Pc_TC001272 | -1.44 | 0.24  |      | -1.26 | 0.34      |      | -1.65 | 0.29      |      | -3.11 | 0.03  | Down | Expressed protein                                                                       |      |
| Pc_TC001291 | 0.79  | 0.25  |      | 1.31  | 0.09      |      | -3.9  | 0.01      | Down | -1.3  | 0.16  |      | adenine nucleotide transporter 1                                                        |      |
| Pc_TC001298 | -2.58 | 0.01  | Down | 0.24  | 0.82      |      | 0.04  | 1         |      | -0.16 | 0.88  |      | RRNA intron-encoded homing endonuclease                                                 |      |
| Pc_TC001302 | 0.07  | 0.81  |      | 0.27  | 0.5       |      | -3.47 | 0         | Down | -2.03 | ##### | Down | myo-inositol-1-phosphate synthase 2                                                     |      |
| Pc_TC001305 | -1.09 | 0.03  | Down | -0.84 | 0.16      |      | 0.82  | 0.38      |      | -0.04 | 0.95  |      | NAC domain containing protein 25                                                        | NAC  |
| Pc_TC001322 | -1.92 | 0     | Down | 0.69  | 0.24      |      | 0.06  | 0.96      |      | -0.69 | 0.3   |      | Expressed protein                                                                       |      |
| Pc_TC001327 | 0.4   | 0.74  |      | 2.08  | 0.03      | Up   | 2.01  | 0.11      |      | 0.71  | 0.52  |      | RNA-directed DNA polymerase (reverse transcriptase)-related family protein              |      |
| Pc_TC001332 | 0.52  | 0.2   |      | 0.47  | 0.36      |      | 2.48  | 0.01      | Up   | 1.44  | 0.01  | Up   | B-S glucosidase 44                                                                      |      |
| Pc_TC001333 | -1.03 | 0.03  | Down | 0.31  | 0.56      |      | -0.19 | 0.84      |      | -0.17 | 0.77  |      | Expressed protein                                                                       |      |
| Pc_TC001349 | -0.42 | 0.39  |      | -1.24 | 0.05      | Down | 0.44  | 0.64      |      | 0.07  | 0.92  |      | ACT domain-containing protein                                                           |      |
| Pc_TC001358 | 0.17  | 0.65  |      | 0.24  | 0.61      |      | -1.87 | 0.04      | Down | -0.8  | 0.15  |      | PIF1 helicase                                                                           |      |
| Pc_TC001374 | -0.69 | 0.32  |      | -0.16 | 0.85      |      | -1.7  | 0.15      |      | -1.7  | 0.04  | Down | Expressed protein                                                                       |      |
| Pc_TC001382 | -0.94 | 0.21  |      | -0.06 | 0.97      |      | -1.47 | 0.23      |      | -2.94 | 0     | Down | Expressed protein                                                                       |      |
| Pc_TC001390 | -0.83 | 0.19  |      | -1.29 | 0.09      |      | 2.85  | 0         | Up   | 1.04  | 0.13  |      | S-adenosyl-L-methionine-dependent methyltransferases superfamily protein                |      |
| Pc_TC001401 | 0.19  | 0.73  |      | -0.28 | 0.67      |      | 1.28  | 0.19      |      | 1.35  | 0.03  | Up   | BTB and TAZ domain protein 2                                                            | TRAF |
| Pc_TC001402 | 0.49  | 0.53  |      | 0.28  | 0.77      |      | 1.89  | 0.09      |      | 2.05  | 0.01  | Up   | BTB and TAZ domain protein 2                                                            | TRAF |
| Pc_TC001405 | -0.95 | 0.13  |      | -0.98 | 0.19      |      | 2.29  | 0.02      | Up   | 1.66  | 0.01  | Up   | Galactose oxidase/kelch repeat superfamily protein                                      |      |
| Pc_TC001424 | 0.83  | 0.21  |      | 0.97  | 0.2       |      | -2.82 | 0.03      | Down | -2.28 | 0.02  | Down | Ribonuclease H-like superfamily protein                                                 |      |
| Pc_TC001425 | 0.05  | 0.94  |      | 0     | 1         |      | -1.73 | 0.13      |      | -2.19 | 0.01  | Down | protein,putative,Ty1-copia sub-class                                                    |      |
| Pc_TC001450 | 0.05  | 0.93  |      | -0.48 | 0.42      |      | 1.77  | 0.06      |      | 1.21  | 0.04  | Up   | cytochrome b6f complex subunit (petM),putative                                          |      |
| Pc_TC001460 | 2.95  | 0     | Up   | 2.38  | 0.05      |      | 2.73  | 0.06      |      | 2.92  | 0.01  | Up   | Expressed protein                                                                       |      |
| Pc_TC001461 | 0.5   | 0.53  |      | 0.79  | 0.37      |      | -3.3  | 0.03      | Down | -1.6  | 0.13  |      | Expressed protein                                                                       |      |
| Pc_TC001489 | 0.81  | 0.04  |      | 0.98  | 0.05      |      | -0.66 | 0.48      |      | 1.42  | 0.01  | Up   | Leucine-rich receptor-like protein kinase family protein                                |      |
| Pc_TC001501 | 0.1   | 0.88  |      | 1.12  | 0.09      |      | -2.16 | 0.06      |      | -2.12 | 0.01  | Down | protein,putative,unclassified                                                           |      |
| Pc_TC001528 | -0.54 | 0.23  |      | -0.08 | 0.89      |      | 2.25  | 0.01      | Up   | 1.48  | 0.01  | Up   | ABI-1-like 1                                                                            |      |
| Pc_TC001542 | -0.53 | 0.2   |      | 0.07  | 0.89      |      | 2.2   | 0.01      | Up   | 1.42  | 0.01  | Up   | aldehyde dehydrogenase 3F1                                                              |      |
| Pc_TC001546 | -3.19 | 0.01  | Down | 0     | 0         |      | 0.65  | 0.61      |      | -0.06 | 0.98  |      | helicase domain-containing protein / zinc finger protein-related                        |      |
| Pc_TC001561 | -0.32 | 0.76  |      | -0.05 | 1         |      | 2.3   | 0.05      | Up   | 1.16  | 0.19  |      | long chain acyl-CoA synthetase 9                                                        |      |
| Pc_TC001563 | 0.41  | 0.44  |      | 0.32  | 0.61      |      | 2.33  | 0.02      | Up   | 1.23  | 0.05  |      | lipid-transfer protein/seed storage 2S albumin superfamily protein                      |      |
| Pc_TC001566 | 0.36  | 0.28  |      | 0.86  | 0.04      |      | -3.5  | 0         | Down | -2.76 | ##### | Down | CONTAINS InterPro DOMAIN/s: EGF-like (InterPro:IPR006210)                               |      |
| Pc_TC001568 | 0.02  | 0.97  |      | 1.03  | 0.03      | Up   | -3.49 | 0         | Down | -1.96 | 0     | Down | heat shock protein 18.2                                                                 |      |
| Pc_TC001573 | 0.44  | 0.3   |      | 2.19  | 7.38E-006 | Up   | -2.83 | 0.01      | Down | -1.32 | 0.04  | Down | NAC (No Apical Meristem) domain transcriptional regulator superfamily protein           | NAC  |
| Pc_TC001581 | 0.55  | 0.47  |      | 0.65  | 0.45      |      | -2.15 | 0.12      |      | -2.15 | 0.04  | Down | Class I glutamine amidotransferase-like superfamily protein                             |      |
| Pc_TC001582 | 0.44  | 0.62  |      | 0.16  | 0.91      |      | 2.6   | 0.02      | Up   | 1.39  | 0.11  |      | Expressed protein                                                                       |      |
| Pc_TC001587 | -0.14 | 0.8   |      | -0.24 | 0.73      |      | -1.79 | 0.1       |      | -1.73 | 0.02  | Down | tetraspanin5                                                                            |      |
| Pc_TC001594 | 0.47  | 0.24  |      | 0.15  | 0.77      |      | 2.64  | 0         | Up   | 0.88  | 0.11  |      | Adenine nucleotide alpha hydrolases-like superfamily protein                            |      |
| Pc_TC001613 | 0.79  | 0.35  |      | 1.81  | 0.04      | Up   | -3.14 | 0.06      |      | -3.43 | 0.01  | Down | Expressed protein                                                                       |      |
| Pc_TC001630 | 0.38  | 0.45  |      | 1.28  | 0.03      | Up   | -2.53 | 0.02      | Down | -1.43 | 0.04  | Down | cationic amino acid transporter 6                                                       |      |
| Pc_TC001637 | 1.02  | 0.01  | Up   | 0.88  | 0.07      |      | -0.35 | 0.7       |      | 1.05  | 0.06  |      | Plant protein of unknown function (DUF828)                                              |      |
| Pc_TC001639 | 0.4   | 0.34  |      | -0.7  | 0.21      |      | 1.94  | 0.03      | Up   | 1.17  | 0.04  | Up   | Purple acid phosphatases superfamily protein                                            |      |
| Pc_TC001643 | -0.92 | 0.2   |      | -0.74 | 0.37      |      | 2.64  | 0.01      | Up   | 1.42  | 0.05  | Up   | elongation factor Ts family protein                                                     |      |
| Pc_TC001651 | -0.27 | 0.64  |      | 0.3   | 0.65      |      | -1.28 | 0.23      |      | -2.44 | 0     | Down | basic helix-loop-helix (bHLH) DNA-binding superfamily protein                           | bHLH |
| Pc_TC001662 | 1.28  | 0.04  | Up   | 0.91  | 0.22      |      | -1.07 | 0.37      |      | 1.22  | 0.1   |      | pathogenesis-related gene 1                                                             |      |
| Pc_TC001668 | -2.75 | 0     | Down | -2.45 | 0.02      | Down | -1.2  | 0.33      |      | -2.75 | 0.01  | Down | NAD(P)-binding Rossmann-fold superfamily protein                                        |      |
| Pc_TC001680 | 1.59  | 0.08  |      | 2.03  | 0.04      | Up   | -0.98 | 0.57      |      | -0.6  | 0.68  |      | Expressed protein                                                                       |      |
| Pc_TC001685 | -0.41 | 0.8   |      | 2.06  | 0.04      | Up   | -0.06 | 1         |      | 0.63  | 0.6   |      | Expressed protein                                                                       |      |
| Pc_TC001693 | -0.99 | 0.25  |      | -2.75 | 0.02      | Down | -0.93 | 0.47      |      | -1.18 | 0.22  |      | phospholipid sterol acyl transferase 1                                                  |      |
| Pc_TC001696 | 0.34  | 0.33  |      | 0.82  | 0.07      |      | -2.24 | 0.02      | Down | -0.89 | 0.1   |      | Protein of unknown function (DUF630 and DUF632)                                         |      |
| Pc_TC001703 | 0.74  | 0.1   |      | 1.12  | 0.04      | Up   | -0.4  | 0.69      |      | 1.3   | 0.03  | Up   | cytochrome P450,family 710,subfamily A,polypeptide 1                                    |      |
| Pc_TC001711 | 0.49  | 0.29  |      | 0.56  | 0.33      |      | -2.49 | 0.02      | Down | -2.68 | 0     | Down | Lateral organ boundaries (LOB) domain family protein                                    | LOB  |
| Pc_TC001747 | 0.88  | 0.17  |      | 0.97  | 0.19      |      | 2.46  | 0.02      | Up   | 2.4   | 0     | Up   | Glycolipid transfer protein (GLTP) family protein                                       |      |
| Pc_TC001751 | 0.52  | 0.1   |      | 0.72  | 0.08      |      | -3.87 | 5.08E-005 | Down | -1.89 | 0     | Down | Cellulase (glycosyl hydrolase family 5) protein                                         |      |
| Pc_TC001762 | -1.62 | 0     | Down | -1.07 | 0.08      |      | -0.14 | 0.88      |      | 0.2   | 0.75  |      | Polyketide cyclase/dehydrase and lipid transport superfamily protein (TAIR:AT3G11720.3) |      |
| Pc_TC001763 | 0.43  | 0.42  |      | 1.31  | 0.03      | Up   | -3.3  | 0.01      | Down | -2.5  | 0     | Down | Cytokinin inducible protein-like protein                                                |      |
| Pc_TC001771 | 1.72  | 0.04  | Up   | 0.97  | 0.36      |      | 0.46  | 0.77      |      | 1.12  | 0.27  |      | receptor like protein 26                                                                |      |
| Pc_TC001787 | 3.39  | ##### | Up   | 0     | 0         |      | 3.08  | 0.01      | Up   | 0.84  | 0.37  |      | Expressed protein                                                                       |      |
| Pc_TC001797 | 4.98  | ##### | Up   | 0     | 0.01      |      | 3.53  | 0         | Up   | 2.89  | 0     | Up   | cytochrome P450,family 711,subfamily A,polypeptide 1                                    |      |
| Pc_TC001798 | 3.32  | ##### | Up   | 0     | 0.01      |      | 2.23  | 0.07      |      | -0.54 | 0.67  |      | cytochrome P450,family 711,subfamily A,polypeptide 1                                    |      |
| Pc_TC001824 | 0.24  | 0.48  |      | -1.23 | 0.01      | Down | 0.15  | 0.86      |      | 0.33  | 0.52  |      | Terpenoid cyclases/Protein prenyltransferases superfamily protein                       |      |
| Pc_TC001834 | 0.43  | 0.46  |      | -0.81 | 0.28      |      | -0.63 | 0.56      |      | -2.22 | 0.01  | Down | LIM domain-containing protein                                                           | LIM  |
| Pc_TC001843 | 2.96  | ##### | Up   | 0     | 3.96E-008 |      | 1.58  | 0.13      |      | -0.7  | 0.36  |      | Thioredoxin superfamily protein                                                         |      |
| Pc_TC001857 | -0.12 | 0.74  |      | -0.33 | 0.48      |      | 1.5   | 0.08      |      | 1.08  | 0.04  | Up   | Homeobox-leucine zipper family protein / lipid-binding START domain-containing p        | HB   |

|             |       |       |      |  |           |           |      |       |      |      |       |      |      |                                                                               |           |
|-------------|-------|-------|------|--|-----------|-----------|------|-------|------|------|-------|------|------|-------------------------------------------------------------------------------|-----------|
| Pc_TC001869 | -1.62 | 0.29  |      |  | -0.06     | 1         |      | 2.53  | 0.05 | Up   | 0.92  | 0.42 |      | unknown protein                                                               |           |
| Pc_TC001871 | 0     | 0.99  |      |  | 0.06      | 0.88      |      | -1.95 | 0.02 | Down | -0.9  | 0.07 |      | CBL-interacting protein kinase 2                                              |           |
| Pc_TC001874 | 0.52  | 0.21  |      |  | 1.69      | 0         | Up   | -1.03 | 0.28 |      | 0.58  | 0.31 |      | glutathione S-transferase tau 7                                               |           |
| Pc_TC001878 | 1.25  | 0.05  |      |  | 1.71      | 0.02      | Up   | -0.03 | 1    |      | 1.41  | 0.06 |      | receptor-like protein kinase 4                                                |           |
| Pc_TC001879 | -0.24 | 0.95  |      |  | 0.32      | 0.88      |      | 0.88  | 0.58 |      | 2.93  | 0    | Up   | Expressed protein                                                             |           |
| Pc_TC001885 | 0.99  | 0.02  |      |  | 0.43      | 0.45      |      | 0.17  | 0.87 |      | 1.19  | 0.04 | Up   | cytochrome P450, family 704, subfamily A, polypeptide 1                       |           |
| Pc_TC001887 | 0.53  | 0.18  |      |  | 0.51      | 0.31      |      | -2.02 | 0.04 | Down | -0.68 | 0.24 |      | BTB and TAZ domain protein 3                                                  | TAZ, TRAF |
| Pc_TC001897 | 1.78  | 0     | Up   |  | 2.52E-006 |           |      | 1.97  | 0.06 |      | 0     | 1    |      | Expressed protein                                                             | LIM       |
| Pc_TC001926 | 0.46  | 0.47  |      |  | 0.78      | 0.28      |      | 2.29  | 0.03 | Up   | 1.61  | 0.02 | Up   | Protein of unknown function (DUF 3339)                                        |           |
| Pc_TC001927 | 0.63  | 0.1   |      |  | 0.84      | 0.08      |      | -2.09 | 0.03 | Down | -0.96 | 0.1  |      | myb-like transcription factor family protein                                  |           |
| Pc_TC001928 | -0.25 | 0.53  |      |  | -0.57     | 0.27      |      | 1.75  | 0.05 | Up   | 0.87  | 0.11 |      | NDH-dependent cyclic electron flow 1                                          |           |
| Pc_TC001937 | 2.18  | ##### | Up   |  | 0         | 8.47E-009 |      | 2.72  | 0.01 | Up   | 0.72  | 0.3  |      | Uncharacterized protein                                                       |           |
| Pc_TC001944 | -1.98 | 0.02  | Down |  | -1.24     | -0.19     |      | -0.67 | 0.59 |      | -0.88 | 0.32 |      | uncharacterized protein                                                       |           |
| Pc_TC001950 | 0.69  | 0.24  |      |  | 1.71      | 0.01      | Up   | 0.53  | 0.62 |      | 0.9   | 0.2  |      | Exostosin family protein                                                      |           |
| Pc_TC001961 | 1.05  | 0.01  | Up   |  | 1.09      | 0.04      | Up   | -1.14 | 0.25 |      | -0.18 | 0.77 |      | Uncharacterized protein                                                       |           |
| Pc_TC001962 | -1.05 | 0.04  | Down |  | -0.77     | 0.21      |      | 0.6   | 0.53 |      | 0.1   | 0.88 |      | Expressed protein                                                             |           |
| Pc_TC001965 | -0.37 | 0.36  |      |  | -0.91     | 0.09      |      | 1.98  | 0.02 | Up   | 1.14  | 0.04 | Up   | non-photochemical quenching 1                                                 |           |
| Pc_TC001971 | 3.11  | ##### | Up   |  | 0         | 2.94E-012 |      | 2.33  | 0.01 | Up   | 0.7   | 0.28 |      | beta-fructofuranosidase 5                                                     |           |
| Pc_TC001975 | -1.05 | 0.16  |      |  | -1.82     | 0.05      | Down | 0.56  | 0.61 |      | 0.15  | 0.86 |      | cysteine-rich RLK (RECEPTOR-like protein kinase) 8                            |           |
| Pc_TC001978 | 2.04  | 0.01  | Up   |  | 2.83      | 0         | Up   | -1.21 | 0.45 |      | 1.5   | 0.11 |      | Expressed protein                                                             |           |
| Pc_TC001980 | -1.6  | 0.11  |      |  | -0.24     | 0.84      |      | -1.69 | 0.23 |      | -3.05 | 0.01 | Down | Expressed protein                                                             |           |
| Pc_TC001990 | -1.21 | 0.05  | Down |  | -0.99     | 0.16      |      | -0.03 | 0.98 |      | -0.9  | 0.21 |      | Expressed protein                                                             |           |
| Pc_TC001991 | -0.05 | 0.94  |      |  | -0.67     | 0.33      |      | 1.81  | 0.06 |      | 1.31  | 0.04 | Up   | related to ABI3/VP1 2                                                         | ABI3VP1   |
| Pc_TC001998 | -0.64 | 0.44  |      |  | -0.18     | 0.87      |      | 2.58  | 0.02 | Up   | 1.41  | 0.07 |      | Nodulin MtN3 family protein                                                   |           |
| Pc_TC002021 | 1.01  | 0.37  |      |  | 2.3       | 0.02      | Up   | -0.79 | 0.68 |      | 0.25  | 0.9  |      | Protein kinase superfamily protein                                            |           |
| Pc_TC002030 | -2.64 | 0.02  | Down |  | -1.4      | 0.2       |      | -0.59 | 0.66 |      | -1.33 | 0.2  |      | Putative polyprotein                                                          |           |
| Pc_TC002038 | 2.65  | 0     | Up   |  | 0         | 0.02      |      | 2.05  | 0.11 |      | -0.09 | 1    |      | like heterochromatin protein (LHP1)                                           |           |
| Pc_TC002050 | 0.14  | 0.8   |      |  | 1.15      | 0.05      | Up   | -0.27 | 0.79 |      | 0.53  | 0.41 |      | P-loop containing nucleoside triphosphate hydrolases superfamily protein      |           |
| Pc_TC002055 | 0.33  | 0.33  |      |  | 1.01      | 0.02      | Up   | -0.95 | 0.27 |      | -0.35 | 0.5  |      | Protein of unknown function, DUF538                                           |           |
| Pc_TC002057 | -0.49 | 0.57  |      |  | 0.25      | 0.8       |      | -1.75 | 0.18 |      | -2.48 | 0.02 | Down | 3' exoribonuclease family, domain 2, putative                                 |           |
| Pc_TC002060 | -3.24 | 0.03  | Down |  | -1.94     | 0.17      |      | -0.3  | 0.86 |      | -0.79 | 0.51 |      | Expressed protein                                                             |           |
| Pc_TC002063 | 0.92  | 0.15  |      |  | 1.38      | 0.05      |      | -4    | 0    | Down | -3.46 | 0    | Down | Putative uncharacterized protein                                              |           |
| Pc_TC002064 | 1.08  | 0.16  |      |  | 2.2       | 0.01      | Up   | 0     | 0    |      | -1.65 | 0.14 |      | Expressed protein                                                             |           |
| Pc_TC002065 | -0.24 | 0.78  |      |  | 0.27      | 0.78      |      | 2.53  | 0.02 | Up   | 1.61  | 0.04 | Up   | SGNH hydrolase-type esterase superfamily protein                              |           |
| Pc_TC002068 | 0.35  | 0.31  |      |  | 0.36      | 0.42      |      | -3.28 | 0    | Down | -1.7  | 0    | Down | adenosine kinase 2                                                            |           |
| Pc_TC002072 | 0.41  | 0.17  |      |  | 0.6       | 0.12      |      | -2.03 | 0.02 | Down | -1.05 | 0.04 | Down | unknown protein                                                               |           |
| Pc_TC002076 | 0.52  | 0.08  |      |  | 0.61      | 0.1       |      | -3.19 | 0    | Down | -0.97 | 0.05 |      | Plant neutral invertase family protein                                        |           |
| Pc_TC002077 | 2.64  | 0     | Up   |  | 0         | 0.03      |      | 0.33  | 0.87 |      | -0.91 | 0.54 |      | Expressed protein                                                             |           |
| Pc_TC002079 | 2.19  | 0     | Up   |  | 0         | 0.01      |      | 1.2   | 0.35 |      | 0.72  | 0.47 |      | Uncharacterized protein                                                       |           |
| Pc_TC002082 | 1.86  | 0.03  | Up   |  | 1.54      | 0.14      |      | 2.14  | 0.1  |      | 0.77  | 0.5  |      | pyruvate decarboxylase-3                                                      |           |
| Pc_TC002095 | 0.62  | 0.33  |      |  | 1.08      | 0.14      |      | -1.62 | 0.18 |      | -1.83 | 0.04 | Down | NAC (No Apical Meristem) domain transcriptional regulator superfamily protein | NAC       |
| Pc_TC002099 | 2.25  | 0.05  | Up   |  | 2.93      | 0.01      | Up   | 2.41  | 0.11 |      | 2.4   | 0.04 | Up   | Expressed protein                                                             |           |
| Pc_TC002133 | -0.48 | 0.22  |      |  | -1.48     | 0         | Down | 1.19  | 0.17 |      | 0.11  | 0.84 |      | sucrose phosphate synthase 3F                                                 |           |
| Pc_TC002138 | -0.92 | 0.18  |      |  | -0.64     | 0.41      |      | -2.69 | 0.03 | Down | -1.01 | 0.2  |      | ribosomal protein S2                                                          |           |
| Pc_TC002157 | -0.07 | 0.94  |      |  | 0.77      | 0.31      |      | 2.24  | 0.03 | Up   | 1.97  | 0.01 | Up   | targeting protein for KKL2                                                    |           |
| Pc_TC002160 | 0.84  | 0.29  |      |  | -1.26     | 0.26      |      | -5.4  | 0.01 | Down | -2.47 | 0.04 | Down | cupin family protein                                                          |           |
| Pc_TC002180 | 0.23  | 0.61  |      |  | 0.66      | 0.21      |      | -4.28 | 0    | Down | -1.21 | 0.05 |      | DNase I-like superfamily protein                                              |           |
| Pc_TC002182 | 2.71  | ##### | Up   |  | 0         | 0         |      | 3.83  | 0    | Up   | 0.85  | 0.37 |      | Expressed protein                                                             |           |
| Pc_TC002185 | 3.11  | ##### | Up   |  | 0         | 0         |      | 2.89  | 0.01 | Up   | 1.47  | 0.07 |      | Uncharacterized protein                                                       |           |
| Pc_TC002186 | 0.63  | 0.08  |      |  | 1.18      | 0.01      | Up   | -1.88 | 0.04 | Down | -0.28 | 0.61 |      | Putative uncharacterized protein                                              | Tify      |
| Pc_TC002189 | -0.55 | 0.46  |      |  | 0.27      | 0.74      |      | -2.5  | 0.05 |      | -3.14 | 0    | Down | EF hand calcium-binding protein family                                        |           |
| Pc_TC002199 | -0.73 | 0.37  |      |  | -1.56     | 0.11      |      | 2.17  | 0.05 | Up   | 0.63  | 0.45 |      | Phosphoglycerate mutase family protein                                        |           |
| Pc_TC002204 | -0.3  | 0.88  |      |  | 0.75      | 0.55      |      | 0     | 0.03 |      | -4.08 | 0.04 | Down | Uncharacterized protein                                                       |           |
| Pc_TC002211 | -0.26 | 0.75  |      |  | -3.21     | 0         | Down | 1.36  | 0.22 |      | -0.35 | 0.69 |      | Pentatricopeptide repeat (PPR) superfamily protein                            |           |
| Pc_TC002243 | -0.5  | 0.34  |      |  | -0.53     | 0.4       |      | -2.84 | 0.01 | Down | -1.92 | 0.01 | Down | GDSL-like Lipase/Acylhydrolase superfamily protein                            |           |
| Pc_TC002248 | 0.37  | 0.42  |      |  | 1.59      | 0         | Up   | -1.25 | 0.21 |      | -0.73 | 0.25 |      | hydroxyproline-rich glycoprotein family protein                               |           |
| Pc_TC002262 | 2.5   | 0.01  | Up   |  | 0         | 0.11      |      | 4.62  | 0    | Up   | -0.37 | 0.89 |      | protein, putative, Ty3-gypsy subclass                                         |           |
| Pc_TC002263 | 0.99  | 0.03  |      |  | 1.73      | 0         | Up   | -2.71 | 0.01 | Down | -2.18 | 0    | Down | Expressed protein                                                             |           |
| Pc_TC002264 | 0.66  | 0.02  |      |  | 0.72      | 0.05      |      | -1.95 | 0.02 | Down | 0.38  | 0.43 |      | Transmembrane amino acid transporter family protein                           |           |
| Pc_TC002268 | 0.22  | 0.74  |      |  | 0.37      | 0.61      |      | -2.44 | 0.04 | Down | -1.06 | 0.18 |      | glycerol-3-phosphate acyltransferase 7                                        |           |
| Pc_TC002286 | 0.72  | 0.01  |      |  | 0.9       | 0.02      |      | -2.08 | 0.01 | Down | -0.48 | 0.33 |      | NAD(P)-linked oxidoreductase superfamily protein                              |           |
| Pc_TC002290 | 2.01  | 0     | Up   |  | 1.5       | 0.08      |      | 2.68  | 0.02 | Up   | 1.26  | 0.14 |      | starch synthase 4                                                             |           |

|             |       |       |      |            |           |      |       |           |      |       |      |      |                                                                                       |      |
|-------------|-------|-------|------|------------|-----------|------|-------|-----------|------|-------|------|------|---------------------------------------------------------------------------------------|------|
| Pc_TC002292 | -4.21 | ##### | Down | -2.42      | 0.01      | Down | -2.61 | 0.04      | Down | -3.66 | 0    | Down | Expressed protein                                                                     |      |
| Pc_TC002297 | -0.92 | 0.24  |      | -0.23      | 0.81      |      | -6.3  | 0         | Down | -2.6  | 0.01 | Down | Putative uncharacterized protein                                                      |      |
| Pc_TC002313 | -0.18 | 0.76  |      | -0.36      | 0.6       |      | 2.05  | 0.04      | Up   | 1.11  | 0.09 |      | basic helix-loop-helix (bHLH) DNA-binding superfamily protein                         | bHLH |
| Pc_TC002324 | -0.17 | 0.87  |      | -0.49      | 0.63      |      | -4.74 | 0.01      | Down | -0.87 | 0.37 |      | Putative uncharacterized protein                                                      |      |
| Pc_TC002329 | 0.59  | 0.09  |      | 0.61       | 0.17      |      | 0.69  | 0.42      |      | 1.16  | 0.02 | Up   | S-adenosylmethionine synthetase 1                                                     |      |
| Pc_TC002333 | 1.18  | 0.02  | Up   | 1.67       | 0.01      | Up   | -2.33 | 0.04      | Down | -0.72 | 0.31 |      | WRKY DNA-binding protein 28                                                           | WRKY |
| Pc_TC002337 | 1.66  | 0.19  |      | -1.53      | 0.58      |      | 2.28  | 0.14      |      | 2.97  | 0.01 | Up   | Leucine-rich repeat protein kinase family protein                                     |      |
| Pc_TC002352 | -0.65 | 0.21  |      | -1.5       | 0.02      | Down | 1.34  | 0.16      |      | 0.63  | 0.31 |      | Ribosomal RNA adenine dimethylase family protein                                      |      |
| Pc_TC002356 | 0.62  | 0.4   |      | 1.56       | 0.04      | Up   | -3.96 | 0.01      | Down | -3.25 | 0    | Down | Putative uncharacterized protein P0452F04.21                                          |      |
| Pc_TC002358 | -3.38 | 0.02  | Down | -1.08      | 0.39      |      | -0.1  | 0.97      |      | -0.25 | 0.85 |      | Protein-tyrosine phosphatase-like,PTPLA                                               |      |
| Pc_TC002362 | 0.48  | 0.11  |      | 0.74       | 0.05      |      | -1.84 | 0.03      | Down | -0.29 | 0.56 |      | glutamate receptor 2.9                                                                |      |
| Pc_TC002380 | 0.54  | 0.22  |      | 0.45       | 0.42      |      | 0.17  | 0.86      |      | 1.28  | 0.03 | Up   | Calcineurin-like metallo-phosphoesterase superfamily protein                          |      |
| Pc_TC002384 | -0.2  | 0.53  |      | -1.06      | 0.01      | Down | 1.48  | 0.08      |      | 0.76  | 0.12 |      | uridylyltransferase-related                                                           |      |
| Pc_TC002385 | -0.61 | 0.1   |      | -1.04      | 0.03      | Down | 1.32  | 0.12      |      | 0.35  | 0.51 |      | uridylyltransferase-related                                                           |      |
| Pc_TC002409 | -1.35 | 0.01  | Down | -0.43      | 0.48      |      | 1.01  | 0.29      |      | 0.61  | 0.32 |      | NB-ARC domain-containing disease resistance protein                                   |      |
| Pc_TC002411 | 0.66  | 0.26  |      | 0.29       | 0.69      |      | 0.21  | 0.85      |      | -2.21 | 0.01 | Down | Vacuolar sorting protein 9 (VPS9) domain                                              |      |
| Pc_TC002434 | -2.61 | 0     | Down | -2.45      | 0.01      | Down | 1.3   | 0.22      |      | 0.54  | 0.46 |      | Twin-arginine translocation pathway,signal sequence                                   |      |
| Pc_TC002437 | -1.1  | 0.14  |      | -0.37      | 0.66      |      | 3.14  | 0         | Up   | 1.77  | 0.01 | Up   | alpha/beta-Hydrolases superfamily protein                                             |      |
| Pc_TC002445 | -0.02 | 0.99  |      | 1.59       | 0.01      | Up   | -0.4  | 0.72      |      | 0.19  | 0.8  |      | DNA/RNA polymerases superfamily protein                                               |      |
| Pc_TC002454 | -0.78 | 0.03  |      | -2.55      | 3.70E-007 | Down | 1.34  | 0.11      |      | 1.11  | 0.03 | Up   | EF-TU receptor                                                                        |      |
| Pc_TC002455 | 0.63  | 0.05  |      | 0.75       | 0.07      |      | -2.33 | 0.01      | Down | -0.36 | 0.48 |      | cysteine-rich RLK (RECEPTOR-like protein kinase) 8                                    |      |
| Pc_TC002475 | -0.03 | 1     |      | 0.42       | 0.77      |      | 1.55  | 0.25      |      | 1.99  | 0.04 | Up   | Expressed protein                                                                     |      |
| Pc_TC002484 | 2.43  | ##### | Up   | 0          | 5.59E-007 |      | 2.85  | 0.01      | Up   | 0.9   | 0.22 |      | Expressed protein                                                                     |      |
| Pc_TC002487 | -0.03 | 0.96  |      | -7.42E-005 | 1         |      | 1.98  | 0.03      | Up   | 1.88  | 0    | Up   | Putative copia-type pol polyprotein                                                   |      |
| Pc_TC002499 | 0.99  | 0.11  |      | 1.62       | 0.02      | Up   | -2.56 | 0.04      | Down | 1.12  | 0.13 |      | hydroxycinnamoyl-CoA shikimate/quinatate hydroxycinnamoyl transferase                 |      |
| Pc_TC002517 | 0.28  | 0.34  |      | 0.27       | 0.47      |      | -1.86 | 0.03      | Down | -0.98 | 0.05 |      | CTP synthase family protein                                                           |      |
| Pc_TC002519 | 0.72  | 0.4   |      | 1.3        | 0.15      |      | -2.14 | 0.16      |      | -4.02 | 0.01 | Down | Expressed protein                                                                     |      |
| Pc_TC002520 | -1.45 | 0.18  |      | 1.06       | 0.25      |      | -3.2  | 0.05      |      | -2.75 | 0.03 | Down | Uncharacterized protein                                                               |      |
| Pc_TC002540 | 0.39  | 0.25  |      | 0.75       | 0.08      |      | -2.86 | 0         | Down | -1.25 | 0.02 | Down | heat shock transcription factor A6B                                                   | HSF  |
| Pc_TC002550 | 0.33  | 0.25  |      | 0.35       | 0.34      |      | -3.56 | 7.91E-005 | Down | -1.31 | 0.01 | Down | Ribosomal protein S5/Elongation factor G/III/V family protein                         |      |
| Pc_TC002552 | -0.66 | 0.21  |      | -0.73      | 0.25      |      | -2.83 | 0.01      | Down | -0.72 | 0.28 |      | Peroxidase superfamily protein                                                        |      |
| Pc_TC002559 | -0.44 | 0.18  |      | -0.69      | 0.11      |      | 1.69  | 0.04      | Up   | 0.69  | 0.17 |      | fructose-2,6-bisphosphatase                                                           |      |
| Pc_TC002573 | 0.46  | 0.54  |      | 1.55       | 0.04      | Up   | 0.92  | 0.42      |      | 0.42  | 0.62 |      | alpha/beta-Hydrolases superfamily protein                                             |      |
| Pc_TC002574 | -0.39 | 0.39  |      | -0.23      | 0.67      |      | -0.68 | 0.48      |      | -1.25 | 0.04 | Down | RmlC-like cupins superfamily protein                                                  |      |
| Pc_TC002582 | 0.74  | 0.12  |      | 1.01       | 0.08      |      | -7.08 | 9.03E-007 | Down | -2.37 | 0    | Down | Expressed protein                                                                     |      |
| Pc_TC002583 | -0.03 | 0.98  |      | -0.44      | 0.55      |      | -1.01 | 0.36      |      | -1.99 | 0.01 | Down | Uncharacterized protein                                                               |      |
| Pc_TC002596 | 0.17  | 0.79  |      | 0.68       | 0.32      |      | -2.48 | 0.03      | Down | -1.83 | 0.02 | Down | Carbohydrate-binding X8 domain superfamily protein                                    |      |
| Pc_TC002599 | -1.03 | 0.01  | Down | 0.66       | 0.16      |      | 0.48  | 0.59      |      | -0.06 | 0.92 |      | Photosystem I,PsaA/PsaB protein                                                       |      |
| Pc_TC002603 | -0.67 | 0.04  |      | -1.05      | 0.02      | Down | 0.94  | 0.26      |      | 0.46  | 0.36 |      | ARM repeat superfamily protein                                                        |      |
| Pc_TC002620 | 0.28  | 0.37  |      | 0.38       | 0.35      |      | -2.51 | 0         | Down | -1.58 | 0    | Down | Major facilitator superfamily protein                                                 |      |
| Pc_TC002628 | 0.39  | 0.19  |      | 0.52       | 0.17      |      | -2.62 | 0         | Down | -1.8  | 0    | Down | Calcium-binding EF-hand family protein                                                |      |
| Pc_TC002643 | -0.26 | 0.63  |      | -0.17      | 0.79      |      | -1.37 | 0.19      |      | -1.39 | 0.05 | Down | Os01g0956800 protein                                                                  |      |
| Pc_TC002648 | -1.37 | 0     | Down | -2.54      | 3.43E-007 | Down | 1.4   | 0.1       |      | 0.2   | 0.7  |      | cellulose synthase like E1                                                            |      |
| Pc_TC002669 | -0.44 | 0.45  |      | -2.15      | 0         | Down | -1.31 | 0.22      |      | -0.28 | 0.69 |      | Os03g0643433 protein                                                                  |      |
| Pc_TC002671 | 0.41  | 0.4   |      | 1.37       | 0.01      | Up   | -1.67 | 0.11      |      | -0.18 | 0.78 |      | Expressed protein                                                                     |      |
| Pc_TC002674 | 0.93  | 0.03  |      | 1.88       | 0         | Up   | -0.72 | 0.46      |      | 0.51  | 0.39 |      | glycosyl hydrolase family 10 protein / carbohydrate-binding domain-containing protein |      |
| Pc_TC002685 | 0.27  | 0.45  |      | 0.68       | 0.13      |      | -2.63 | 0.01      | Down | -1.9  | 0    | Down | Expressed protein                                                                     |      |
| Pc_TC002690 | 0.38  | 0.62  |      | 0.23       | 0.81      |      | 2.27  | 0.04      | Up   | -0.61 | 0.51 |      | putative,unclassified                                                                 |      |
| Pc_TC002698 | -0.24 | 0.77  |      | 0          | 1         |      | 3.43  | 0         | Up   | 0.67  | 0.41 |      | Wound-responsive family protein                                                       |      |
| Pc_TC002726 | 0.26  | 0.51  |      | -0.26      | 0.62      |      | -2.7  | 0.01      | Down | -2.1  | 0    | Down | ACC oxidase 1                                                                         |      |
| Pc_TC002729 | 0.65  | 0.12  |      | 0.67       | 0.2       |      | -2.18 | 0.03      | Down | -0.39 | 0.52 |      | Expressed protein                                                                     |      |
| Pc_TC002744 | 0.51  | 0.15  |      | 0.8        | 0.07      |      | -2.5  | 0.01      | Down | -1.4  | 0.01 | Down | Senescence/dehydration-associated protein-related                                     |      |
| Pc_TC002746 | 1.82  | 0.01  | Up   | 1.19       | 0.19      |      | 0.95  | 0.45      |      | 1.91  | 0.02 | Up   | CBS domain-containing protein                                                         |      |
| Pc_TC002750 | 0.58  | 0.3   |      | 0.34       | 0.62      |      | -3.47 | 0         | Down | -0.31 | 0.67 |      | Universal stress protein family protein,expressed                                     |      |
| Pc_TC002765 | 2.99  | 0.01  | Up   | 2.64       | 0.05      |      | 1.31  | 0.53      |      | 3.75  | 0    | Up   | Expressed protein                                                                     |      |
| Pc_TC002779 | 0.83  | 0.03  |      | 1.16       | 0.01      | Up   | -1.16 | 0.21      |      | 0.63  | 0.24 |      | HXXXD-type acyl-transferase family protein                                            |      |
| Pc_TC002782 | -0.14 | 0.9   |      | 1.06       | 0.22      |      | -3.63 | 0.02      | Down | -1.5  | 0.15 |      | Expressed protein                                                                     |      |
| Pc_TC002784 | -1.11 | 0.09  |      | -1.89      | 0.02      | Down | 0.22  | 0.85      |      | -0.84 | 0.27 |      | Putative uncharacterized protein                                                      |      |
| Pc_TC002789 | 0.86  | 0.11  |      | 1.85       | 0         | Up   | 0.81  | 0.43      |      | 0.99  | 0.14 |      | RHO guanyl-nucleotide exchange factor 14                                              |      |
| Pc_TC002807 | 0.49  | 0.51  |      | 1.74       | 0.02      | Up   | -0.23 | 0.86      |      | -0.34 | 0.72 |      | H0321H01.8 protein                                                                    |      |
| Pc_TC002819 | -0.84 | 0.04  |      | -1.46      | 0.01      | Down | 1.53  | 0.08      |      | 0.48  | 0.38 |      | P-loop containing nucleoside triphosphate hydrolases superfamily protein              |      |
| Pc_TC002823 | 0.67  | 0.23  |      | 0.4        | 0.56      |      | 1.48  | 0.15      |      | 1.53  | 0.02 | Up   | unknown protein                                                                       |      |

|             |       |       |      |       |           |      |       |      |      |       |      |      |                                                                                |           |
|-------------|-------|-------|------|-------|-----------|------|-------|------|------|-------|------|------|--------------------------------------------------------------------------------|-----------|
| Pc_TC002831 | 0.41  | 0.39  |      | 1.14  | 0.04      | Up   | -0.02 | 0.98 |      | 0.25  | 0.7  |      | unknown protein                                                                |           |
| Pc_TC002838 | 0.04  | 0.97  |      | 0.09  | 0.92      |      | -2.51 | 0.04 | Down | -1.88 | 0.03 | Down | unknown protein                                                                |           |
| Pc_TC002854 | -1.46 | 0     | Down | -2.98 | 4.99E-007 | Down | 1.95  | 0.03 | Up   | 0.66  | 0.22 |      | Hydroxyproline-rich glycoprotein family protein                                |           |
| Pc_TC002857 | 0.46  | 0.21  |      | 0.29  | 0.53      |      | -2.08 | 0.03 | Down | -0.65 | 0.24 |      | RmlC-like cupins superfamily protein                                           |           |
| Pc_TC002859 | 0.85  | 0.03  |      | 1.5   | 0         | Up   | -2.41 | 0.02 | Down | -0.39 | 0.5  |      | OSIGBa0114M03.4 protein                                                        |           |
| Pc_TC002861 | 0.69  | 0.49  |      | 2.48  | 0.01      | Up   | -0.78 | 0.63 |      | 0.71  | 0.52 |      | Glycosyltransferase family 61 protein                                          |           |
| Pc_TC002862 | -1.34 | 0.02  | Down | -1.42 | 0.04      | Down | 0.5   | 0.62 |      | 0.15  | 0.83 |      | receptor lectin kinase                                                         |           |
| Pc_TC002885 | 0.7   | 0.03  |      | 0.66  | 0.08      |      | -1.79 | 0.04 | Down | 0.48  | 0.35 |      | Clp ATPase                                                                     |           |
| Pc_TC002886 | -0.23 | 0.87  |      | -3.33 | 0.04      | Down | 0.54  | 0.7  |      | 0.44  | 0.69 |      | Eukaryotic translation initiation factor 3 subunit D                           |           |
| Pc_TC002888 | -1.21 | 0.02  | Down | -1.36 | 0.04      | Down | 0.25  | 0.8  |      | 0.19  | 0.76 |      | Expressed protein                                                              |           |
| Pc_TC002892 | 1.18  | 0.11  |      | 0.97  | 0.27      |      | -0.29 | 0.84 |      | 1.94  | 0.02 | Up   | anthranilate synthase beta subunit 1                                           |           |
| Pc_TC002894 | 0.84  | 0.01  |      | 0.57  | 0.18      |      | -0.43 | 0.62 |      | 1.35  | 0.01 | Up   | serine carboxypeptidase-like 6                                                 |           |
| Pc_TC002895 | -0.37 | 0.55  |      | -0.75 | 0.31      |      | 2.03  | 0.04 | Up   | 1.18  | 0.08 |      | Protein kinase superfamily protein                                             |           |
| Pc_TC002932 | -0.08 | 0.94  |      | 0.8   | 0.3       |      | -4.79 | 0    | Down | -1.4  | 0.12 |      | Uncharacterized protein                                                        |           |
| Pc_TC002935 | 1.75  | 0     | Up   | 0     | 1.25E-009 |      | 1.31  | 0.19 |      | -0.54 | 0.46 |      | Expressed protein                                                              |           |
| Pc_TC002957 | 0     | 1     |      | 2.87  | 0.28      |      | 5.26  | 0.01 | Up   | 5.15  | 0    | Up   | hydroxycinnamoyl-CoA shikimate/quininate hydroxycinnamoyl transferase          |           |
| Pc_TC002958 | 0.6   | 0.21  |      | 1.06  | 0.07      |      | -3.97 | 0    | Down | -2.1  | 0    | Down | Inositol 1,3,4-trisphosphate 5/6-kinase family protein                         |           |
| Pc_TC002961 | 0.28  | 0.55  |      | 1.38  | 0.01      | Up   | -3.54 | 0    | Down | -1.9  | 0.01 | Down | Uncharacterized protein                                                        |           |
| Pc_TC002968 | 0.7   | 0.1   |      | 1.12  | 0.03      | Up   | 0.99  | 0.29 |      | 1.26  | 0.03 | Up   | leucine-rich repeat transmembrane protein kinase family protein                |           |
| Pc_TC002972 | -0.1  | 0.8   |      | -0.6  | 0.23      |      | 2.12  | 0.02 | Up   | 1.35  | 0.01 | Up   | PsbP-like protein 2                                                            |           |
| Pc_TC002976 | 0.83  | 0.01  |      | 0.29  | 0.46      |      | -1.91 | 0.03 | Down | 0.55  | 0.26 |      | beta carbonic anhydrase 5                                                      |           |
| Pc_TC002980 | 0.57  | 0.13  |      | 0.44  | 0.36      |      | -3.5  | 0    | Down | -2.24 | 0    | Down | ethylene response factor 8                                                     | AP2-EREBP |
| Pc_TC002983 | 3.17  | ##### | Up   | 4.82  | 1.29E-010 | Up   | -0.5  | 0.76 |      | 2.85  | 0    | Up   | Glycosyl hydrolase family 10 protein                                           |           |
| Pc_TC002988 | 1.21  | 0     | Up   | 0.61  | 0.25      |      | -0.71 | 0.46 |      | 0.4   | 0.49 |      | pyrimidine 2                                                                   |           |
| Pc_TC002998 | -0.87 | 0.04  |      | -1.11 | 0.04      | Down | 1.24  | 0.16 |      | -0.2  | 0.73 |      | Ribonuclease H-like superfamily protein                                        |           |
| Pc_TC003004 | 2.08  | 0.01  | Up   | 0     | 0.01      |      | 1.58  | 0.21 |      | -0.74 | 0.56 |      | Expressed protein                                                              |           |
| Pc_TC003008 | -2.35 | 0.04  | Down | -1.11 | 0.34      |      | -1    | 0.48 |      | 0.16  | 0.91 |      | Expressed protein                                                              |           |
| Pc_TC003009 | -0.59 | 0.22  |      | -1.19 | 0.05      |      | 2.07  | 0.02 | Up   | 1.07  | 0.07 |      | Inositol monophosphatase family protein                                        |           |
| Pc_TC003015 | -0.82 | 0.05  |      | -1.14 | 0.03      | Down | 1.52  | 0.08 |      | 0.69  | 0.2  |      | unknown protein                                                                |           |
| Pc_TC003024 | -2    | 0     | Down | -2.87 | 0         | Down | 0.97  | 0.32 |      | -1.79 | 0.01 | Down | SPX domain gene 3                                                              |           |
| Pc_TC003039 | 1.15  | 0.03  | Up   | 1.63  | 0.01      | Up   | -2.58 | 0.02 | Down | 0.04  | 0.96 |      | Family of unknown function (DUF716)                                            |           |
| Pc_TC003040 | -0.55 | 0.54  |      | 0.31  | 0.75      |      | -2.9  | 0.05 | Down | -5.58 | 0    | Down | Uncharacterized protein                                                        |           |
| Pc_TC003045 | 1.91  | 0.02  | Up   | 0     | 0.01      |      | 1.2   | 0.35 |      | 0.59  | 0.58 |      | Expressed protein                                                              |           |
| Pc_TC003047 | 1.13  | 0.03  | Up   | 1.06  | 0.09      |      | 0.06  | 0.96 |      | 1.33  | 0.04 | Up   | pathogenesis-related family protein                                            |           |
| Pc_TC003052 | 0.49  | 0.09  |      | 0.63  | 0.09      |      | -2.05 | 0.02 | Down | -0.4  | 0.41 |      | polyamine oxidase 2                                                            |           |
| Pc_TC003053 | 0.41  | 0.45  |      | -0.83 | 0.24      |      | -4.34 | 0    | Down | -2.1  | 0.01 | Down | cysteine-rich RLK (RECEPTOR-like protein kinase) 10                            |           |
| Pc_TC003078 | 0.48  | 0.12  |      | -0.62 | 0.13      |      | -2.58 | 0    | Down | 0.02  | 0.97 |      | unknown protein                                                                |           |
| Pc_TC003079 | 1.84  | 0.03  | Up   | -0.15 | 0.97      |      | -0.01 | 1    |      | 0.76  | 0.5  |      | Phosphofructokinase family protein                                             |           |
| Pc_TC003086 | -0.51 | 0.89  |      | 0     | 0.2       |      | 2.9   | 0.05 | Up   | 1.95  | 0.12 |      | Expressed protein                                                              |           |
| Pc_TC003089 | 0.34  | 0.34  |      | 1     | 0.02      |      | -2.09 | 0.02 | Down | -1.64 | 0    | Down | rotamase FKBP 1                                                                | TPR       |
| Pc_TC003099 | 0.19  | 0.53  |      | -0.39 | 0.33      |      | -2.1  | 0.02 | Down | -0.65 | 0.19 |      | ADPGLC-PPase large subunit                                                     |           |
| Pc_TC003106 | 0.47  | 0.31  |      | 0.13  | 0.83      |      | -2.54 | 0.02 | Down | -1.33 | 0.04 | Down | Expressed protein                                                              |           |
| Pc_TC003116 | 0.07  | 0.89  |      | 0.73  | 0.18      |      | -1.48 | 0.14 |      | -1.62 | 0.01 | Down | dehydration-induced protein (ERD15)                                            |           |
| Pc_TC003129 | 0.32  | 0.56  |      | 0.56  | 0.39      |      | 0.2   | 0.86 |      | 1.34  | 0.04 | Up   | Leucine-rich repeat protein kinase family protein                              |           |
| Pc_TC003138 | -0.38 | 0.53  |      | -0.29 | 0.69      |      | 2.37  | 0.02 | Up   | 0.57  | 0.41 |      | Expressed protein                                                              |           |
| Pc_TC003140 | 1.14  | 0.05  | Up   | 0.51  | 0.48      |      | -0.19 | 0.87 |      | 0     | 1    |      | unknown protein                                                                |           |
| Pc_TC003160 | -0.65 | 0.03  |      | -1.48 | 0         | Down | 1.46  | 0.09 |      | 0.36  | 0.45 |      | dicarboxylate diiron protein,putative (Crd1)                                   |           |
| Pc_TC003175 | 0.04  | 0.96  |      | -0.05 | 0.96      |      | -3.44 | 0.01 | Down | -3.05 | 0    | Down | Putative uncharacterized protein                                               |           |
| Pc_TC003177 | -0.64 | 0.28  |      | -0.19 | 0.79      |      | -1.77 | 0.11 |      | -1.85 | 0.01 | Down | AGC (cAMP-dependent,cGMP-dependent and protein kinase C) kinase family protein |           |
| Pc_TC003182 | 1.4   | 0.07  |      | 1.7   | 0.05      | Up   | 0     | 0    |      | -0.49 | 0.66 |      | cysteine-rich RLK (RECEPTOR-like protein kinase) 8                             |           |
| Pc_TC003188 | -0.47 | 0.33  |      | -1.85 | 0         | Down | 2.1   | 0.02 | Up   | 1.02  | 0.09 |      | photosystem I subunit K                                                        |           |
| Pc_TC003201 | 0.76  | 0.21  |      | 1.54  | 0.02      | Up   | -3.15 | 0.01 | Down | 0.68  | 0.35 |      | Expressed protein                                                              |           |
| Pc_TC003209 | -0.92 | 1     |      | -0.94 | 1         |      | 3.79  | 0.03 | Up   | 2.8   | 0.1  |      | Uncharacterized protein                                                        |           |
| Pc_TC003217 | 0.55  | 0.32  |      | 1.37  | 0.03      | Up   | -1.88 | 0.09 |      | -0.54 | 0.45 |      | Galactose oxidase/kelch repeat superfamily protein                             |           |
| Pc_TC003230 | 0.32  | 0.58  |      | 1.33  | 0.04      | Up   | -1.79 | 0.11 |      | -0.3  | 0.68 |      | MYB-like 102                                                                   | MYB       |
| Pc_TC003252 | -0.99 | 0.37  |      | -0.3  | 0.83      |      | -5.02 | 0.01 | Down | -0.9  | 0.43 |      | Expressed protein                                                              |           |
| Pc_TC003253 | 0.08  | 1     |      | 2.96  | 0.02      | Up   | 0     | 0.26 |      | 0     | 0.24 |      | Uncharacterized protein                                                        |           |
| Pc_TC003256 | 0.6   | 0.26  |      | 1.27  | 0.04      | Up   | -1.74 | 0.11 |      | -1.02 | 0.16 |      | Expressed protein                                                              |           |
| Pc_TC003269 | 0.94  | 0.34  |      | 1.89  | 0.05      | Up   | -3.5  | 0.08 |      | -2.79 | 0.07 |      | Expressed protein                                                              |           |
| Pc_TC003288 | 2.17  | 0.03  | Up   | 0     | 0.11      |      | 1.26  | 0.43 |      | -0.57 | 0.79 |      | diphthamide synthesis DPH2 family protein                                      |           |
| Pc_TC003291 | -0.55 | 0.67  |      | 1.22  | 0.23      |      | -4.58 | 0.03 | Down | 0     | 0    |      | phosphofructokinase 7                                                          |           |
| Pc_TC003293 | 2.25  | 0.05  | Up   | 0     | 0.2       |      | 1.31  | 0.45 |      | 1.13  | 0.45 |      | Expressed protein                                                              |           |

|             |       |      |      |       |      |      |       |           |      |       |       |      |                                                                          |      |
|-------------|-------|------|------|-------|------|------|-------|-----------|------|-------|-------|------|--------------------------------------------------------------------------|------|
| Pc_TC003297 | -3.83 | 0.04 | Down | 0.15  | 0.96 |      | 0.24  | 0.91      |      | 0.24  | 0.88  |      | Uncharacterized protein                                                  |      |
| Pc_TC003300 | -0.07 | 0.89 |      | -1.28 | 0.04 | Down | 0.71  | 0.46      |      | 0.25  | 0.69  |      | alpha/beta-Hydrolases superfamily protein                                |      |
| Pc_TC003312 | -2.98 | 0.02 | Down | -0.42 | 0.74 |      | -2.14 | 0.16      |      | -0.77 | 0.49  |      | Expressed protein                                                        |      |
| Pc_TC003317 | 0.27  | 0.61 |      | -0.09 | 0.9  |      | -0.89 | 0.37      |      | 1.38  | 0.03  | Up   | P-loop containing nucleoside triphosphate hydrolases superfamily protein |      |
| Pc_TC003319 | 0.66  | 0.53 |      | 1.38  | 0.18 |      | 0     | 0.01      |      | -3.37 | 0.04  | Down | Expressed protein                                                        |      |
| Pc_TC003325 | -0.81 | 0.32 |      | -1.26 | 0.19 |      | -1.5  | 0.24      |      | -2.11 | 0.03  | Down | Maturase                                                                 |      |
| Pc_TC003345 | 0.22  | 0.87 |      | 2.18  | 0.01 | Up   | 1.18  | 0.36      |      | 0.92  | 0.35  |      | Expressed protein                                                        |      |
| Pc_TC003346 | 0.83  | 0.4  |      | 0.38  | 0.78 |      | -2.5  | 0.16      |      | -3.37 | 0.04  | Down | Uncharacterized protein                                                  |      |
| Pc_TC003357 | -1.21 | 0.16 |      | 0.53  | 0.54 |      | -1.37 | 0.29      |      | -2.66 | 0.01  | Down | protein,putative,Ty3-gypsy subclass                                      |      |
| Pc_TC003361 | 1.28  | 0.03 | Up   | 1.35  | 0.05 | Up   | 0.97  | 0.37      |      | 0.54  | 0.46  |      | Expressed protein                                                        |      |
| Pc_TC003366 | 1.16  | 0.03 | Up   | 0.94  | 0.15 |      | -0.53 | 0.62      |      | 1.36  | 0.04  | Up   | Expressed protein                                                        |      |
| Pc_TC003402 | -2.73 | 0.05 | Down | 0.19  | 0.9  |      | -0.5  | 0.75      |      | -2.18 | 0.09  |      | Expressed protein                                                        |      |
| Pc_TC003431 | 1.41  | 0.02 | Up   | 1.37  | 0.05 |      | -0.67 | 0.57      |      | -0.8  | 0.34  |      | basic helix-loop-helix (bHLH) DNA-binding superfamily protein            | bHLH |
| Pc_TC003442 | 0.08  | 0.79 |      | -0.12 | 0.76 |      | -2.8  | 0         | Down | -1.93 | 0     | Down | SNF1-related protein kinase 2.5                                          |      |
| Pc_TC003445 | 1.66  | 0.03 | Up   | 2.23  | 0.01 | Up   | 0.25  | 0.88      |      | 0.87  | 0.37  |      | Eukaryotic aspartyl protease family protein                              |      |
| Pc_TC003450 | 0.51  | 0.09 |      | 0.72  | 0.07 |      | -4.47 | 3.43E-006 | Down | -1.45 | 0     | Down | Remorin family protein                                                   |      |
| Pc_TC003452 | 1.76  | 0.19 |      | 3.06  | 0.01 | Up   | -1.82 | 0.53      |      | 0.63  | 0.78  |      | cytochrome P450, family 94, subfamily C, polypeptide 1                   |      |
| Pc_TC003453 | -0.4  | 0.63 |      | -2.47 | 0.02 | Down | 1.26  | 0.27      |      | 0.17  | 0.87  |      | Uncharacterized protein                                                  |      |
| Pc_TC003458 | 0.57  | 0.12 |      | 0.66  | 0.16 |      | -1.97 | 0.04      | Down | -1.03 | 0.07  |      | Protein kinase superfamily protein                                       |      |
| Pc_TC003469 | -0.28 | 0.55 |      | -0.62 | 0.29 |      | 2.1   | 0.02      | Up   | 1.72  | 0     | Up   | Protein of unknown function, DUF642                                      |      |
| Pc_TC003481 | -0.04 | 0.96 |      | 0.48  | 0.46 |      | -1.02 | 0.34      |      | -1.63 | 0.03  | Down | Glycosyl hydrolases family 31 protein                                    |      |
| Pc_TC003512 | 1.01  | 0.02 | Up   | 0.36  | 0.53 |      | -0.13 | 0.89      |      | 1.14  | 0.05  |      | lipid phosphate phosphatase 2                                            |      |
| Pc_TC003527 | 2.45  | 0    | Up   | 0     | 0.02 |      | 1.06  | 0.44      |      | 0.21  | 0.9   |      | Expressed protein                                                        |      |
| Pc_TC003537 | -1.73 | 0.24 |      | -1.75 | 0.28 |      | 2.96  | 0.02      | Up   | 0.77  | 0.5   |      | Expressed protein                                                        |      |
| Pc_TC003553 | -0.34 | 0.35 |      | -0.18 | 0.7  |      | 1.75  | 0.04      | Up   | 1.03  | 0.05  | Up   | STRUBBELIG-receptor family 3                                             |      |
| Pc_TC003563 | -0.03 | 0.95 |      | 0.02  | 0.97 |      | -3.49 | 0         | Down | -2.49 | 0     | Down | Expressed protein                                                        |      |
| Pc_TC003565 | -1.1  | 0    | Down | -1.73 | 0    | Down | 0.7   | 0.41      |      | -0.83 | 0.11  |      | purple acid phosphatase 3                                                |      |
| Pc_TC003573 | -2.21 | 0.03 | Down | -1.23 | 0.23 |      | -2.32 | 0.1       |      | -1.41 | 0.16  |      | Uncharacterized protein                                                  |      |
| Pc_TC003577 | -3.45 | 0.02 | Down | -1.66 | 0.2  |      | 0.11  | 0.97      |      | -0.09 | 0.97  |      | Putative uncharacterized protein                                         |      |
| Pc_TC003579 | 0.8   | 0.01 |      | 1.33  | 0    | Up   | -2.56 | 0.01      | Down | -0.08 | 0.88  |      | tonoplast dicarboxylate transporter                                      |      |
| Pc_TC003581 | 2.71  | 0.02 | Up   | 0     | 0.27 |      | 2.31  | 0.15      |      | -0.11 | 1     |      | Expressed protein                                                        |      |
| Pc_TC003584 | 1.65  | 0.01 | Up   | 0     | 0    |      | 1.28  | 0.27      |      | -0.49 | 0.61  |      | indole-3-butyric acid response 1                                         |      |
| Pc_TC003588 | 2.67  | 0    | Up   | 0     | 0    |      | 2.22  | 0.06      |      | 0.35  | 0.75  |      | Uncharacterized protein                                                  |      |
| Pc_TC003614 | -2.54 | 0.01 | Down | -2.05 | 0.06 |      | -3.92 | 0.01      | Down | -3.48 | 0     | Down | Os06g0248600 protein                                                     |      |
| Pc_TC003615 | 0.95  | 0.25 |      | 2.24  | 0.01 | Up   | -2.08 | 0.18      |      | 0.99  | 0.29  |      | Uncharacterized protein                                                  |      |
| Pc_TC003622 | -0.77 | 0.08 |      | -1.47 | 0.01 | Down | 1.85  | 0.04      | Up   | 0.84  | 0.14  |      | Trigger factor, ribosome-binding, bacterial                              |      |
| Pc_TC003627 | 0.25  | 0.57 |      | 0.67  | 0.21 |      | -3.25 | 0         | Down | -1.62 | 0.01  | Down | HVA22 homologue E                                                        |      |
| Pc_TC003628 | 0.08  | 0.95 |      | -0.16 | 0.88 |      | -3.3  | 0.03      | Down | -4.77 | 0     | Down | Expressed protein                                                        |      |
| Pc_TC003631 | 0     | 0    |      | -3.26 | 0.05 | Down | 4.54  | 9.97E-005 | Up   | 0     | 0     |      | protein,putative,unclassified                                            |      |
| Pc_TC003646 | 0.69  | 0.19 |      | 1.07  | 0.08 |      | 1.32  | 0.18      |      | 1.37  | 0.03  | Up   | Ribosomal protein L35Ae family protein                                   |      |
| Pc_TC003649 | 0.8   | 0.03 |      | 1.05  | 0.02 | Up   | -0.48 | 0.59      |      | 0.12  | 0.82  |      | Uncharacterised conserved protein (UCP012943)                            |      |
| Pc_TC003656 | 1.71  | 0.02 | Up   | 0.35  | 0.73 |      | 0.82  | 0.51      |      | 1.85  | 0.02  | Up   | 3beta-hydroxysteroid-dehydrogenase/decarboxylase isoform 2               |      |
| Pc_TC003671 | 0.41  | 0.45 |      | 1.36  | 0.03 | Up   | -3.91 | 0         | Down | -2.24 | 0     | Down | Expressed protein                                                        |      |
| Pc_TC003675 | -3.51 | 0.01 | Down | -0.72 | 0.55 |      | 1.98  | 0.1       |      | 1.77  | 0.04  | Up   | cysteine-rich RLK (RECEPTOR-like protein kinase) 39                      |      |
| Pc_TC003676 | -0.57 | 0.74 |      | 0     | 0.05 |      | 2.66  | 0.04      | Up   | 0.97  | 0.42  |      | Expressed protein                                                        |      |
| Pc_TC003679 | -0.52 | 0.07 |      | -1.29 | 0    | Down | 1.64  | 0.07      |      | 0.57  | 0.25  |      | phosphoribulokinase                                                      |      |
| Pc_TC003682 | 0.62  | 0.49 |      | 0.9   | 0.35 |      | -1.76 | 0.24      |      | -2.64 | 0.04  | Down | Uncharacterized protein                                                  |      |
| Pc_TC003686 | -0.75 | 0.4  |      | -1.42 | 0.18 |      | -0.78 | 0.55      |      | -2.34 | 0.03  | Down | Putative uncharacterized protein                                         |      |
| Pc_TC003688 | 2.17  | 0    | Up   | 0     | 0    |      | 1.25  | 0.31      |      | -1.91 | 0.11  |      | La protein 1                                                             |      |
| Pc_TC003693 | 0.74  | 0.03 |      | 0.96  | 0.02 |      | -2.03 | 0.02      | Down | 0.1   | 0.86  |      | myb domain protein 15                                                    | MYB  |
| Pc_TC003702 | 2.3   | 0.01 | Up   | -0.07 | 1    |      | 2.52  | 0.05      |      | 0.21  | 0.92  |      | B12D protein                                                             |      |
| Pc_TC003718 | -0.23 | 0.67 |      | 1.45  | 0.01 | Up   | -5.09 | 6.65E-005 | Down | -4.59 | ##### | Down | Expressed protein                                                        |      |
| Pc_TC003722 | 1.7   | 0.01 | Up   | 2.31  | 0    | Up   | -2.67 | 0.07      |      | 0.43  | 0.64  |      | Expressed protein                                                        |      |
| Pc_TC003729 | 0.95  | 0.38 |      | 2.43  | 0.01 | Up   | -3.08 | 0.14      |      | -1.37 | 0.37  |      | Expressed protein                                                        |      |
| Pc_TC003736 | 0.74  | 0.11 |      | 1.25  | 0.02 | Up   | -0.66 | 0.51      |      | 0.13  | 0.84  |      | purple acid phosphatase 10                                               |      |
| Pc_TC003738 | 0.7   | 0.32 |      | 1.15  | 0.14 |      | -6.2  | 0         | Down | -4.49 | 0     | Down | Expressed protein                                                        |      |
| Pc_TC003747 | 1.56  | 0.27 |      | 0.74  | 0.74 |      | 2.99  | 0.05      | Up   | 1.95  | 0.15  |      | Expressed protein                                                        |      |
| Pc_TC003783 | 0.44  | 0.61 |      | -4.94 | 0    | Down | 0.28  | 0.84      |      | -0.13 | 0.93  |      | Uncharacterized protein                                                  |      |
| Pc_TC003788 | -1.41 | 0.11 |      | -2.26 | 0.04 | Down | -0.43 | 0.73      |      | -0.82 | 0.38  |      | MUTM homolog-1                                                           |      |
| Pc_TC003810 | 2.89  | 0    | Up   | 0     | 0.11 |      | 2.31  | 0.1       |      | -0.37 | 0.89  |      | Alanyl-tRNA synthetase                                                   |      |
| Pc_TC003811 | 0.11  | 0.85 |      | 1.19  | 0.06 |      | -2.44 | 0.03      | Down | -0.71 | 0.33  |      | Expressed protein                                                        |      |
| Pc_TC003814 | 1.97  | 0    | Up   | 0     | 0    |      | 0.96  | 0.43      |      | -0.47 | 0.65  |      | aminopeptidase M1                                                        |      |

|             |       |       |      |       |           |      |       |           |      |       |       |      |                                                                          |
|-------------|-------|-------|------|-------|-----------|------|-------|-----------|------|-------|-------|------|--------------------------------------------------------------------------|
| Pc_TC003816 | 0.51  | 0.25  |      | 0.5   | 0.36      |      | -3.11 | 0         | Down | -1.44 | 0.03  | Down | Leucine-rich repeat protein kinase family protein                        |
| Pc_TC003817 | 2.69  | 0     | Up   | 0     | 0.07      |      | 1.31  | 0.38      |      | -0.11 | 1     |      | Expressed protein                                                        |
| Pc_TC003828 | 2.96  | 0     | Up   | 0     | 0.03      |      | 2.37  | 0.07      |      | 1.21  | 0.26  |      | Gasp                                                                     |
| Pc_TC003842 | -0.65 | 0.14  |      | -1.11 | 0.05      | Down | 1.22  | 0.17      |      | 0.05  | 0.94  |      | Protein of unknown function (DUF581)                                     |
| Pc_TC003848 | 1.4   | 0.16  |      | 2.2   | 0.03      | Up   | -3.08 | 0.14      |      | 0.21  | 0.92  |      | Expressed protein                                                        |
| Pc_TC003850 | 2.72  | 0     | Up   | 0     | 0.11      |      | 2.28  | 0.11      |      | -0.05 | 1     |      | calcium-dependent protein kinase 27                                      |
| Pc_TC003877 | 0.44  | 0.84  |      | 0.84  | 0.61      |      | 3.02  | 0.03      | Up   | 2.63  | 0.02  | Up   | Expressed protein                                                        |
| Pc_TC003881 | 2.23  | 0     | Up   | 3.2   | 2.35E-005 | Up   | 0.37  | 0.79      |      | 1.7   | 0.04  | Up   | Uncharacterized protein                                                  |
| Pc_TC003883 | 3.94  | 0     | Up   | 0     | 0.67      |      | 3.09  | 0.11      |      | 2.87  | 0.09  |      | 2-oxoglutarate dehydrogenase,E1 component                                |
| Pc_TC003899 | -1.99 | 0.01  | Down | -0.52 | 0.52      |      | 1.3   | 0.22      |      | -0.05 | 0.96  |      | Expressed protein                                                        |
| Pc_TC003905 | -0.67 | 0.39  |      | 0.65  | 0.41      |      | -2.52 | 0.06      |      | -2.12 | 0.03  | Down | Nodulin MtN3 family protein                                              |
| Pc_TC003909 | 0.89  | 0     |      | 1.4   | 0         | Up   | -1.73 | 0.04      | Down | -0.01 | 0.98  |      | Transmembrane amino acid transporter family protein                      |
| Pc_TC003911 | 0.19  | 0.68  |      | 0.37  | 0.51      |      | -0.66 | 0.51      |      | -3.12 | ##### | Down | S-locus lectin protein kinase family protein                             |
| Pc_TC003918 | -0.53 | 0.5   |      | 0.23  | 0.8       |      | 3.26  | 0         | Up   | 2.12  | 0     | Up   | Major facilitator superfamily protein                                    |
| Pc_TC003932 | 0.76  | 0.71  |      | 2.54  | 0.05      | Up   | 0     | 0.19      |      | 0     | 0.16  |      | Uncharacterized protein (Fragment)                                       |
| Pc_TC003954 | 0.49  | 0.54  |      | 0.75  | 0.4       |      | -3.08 | 0.04      | Down | -2.09 | 0.05  |      | Expressed protein                                                        |
| Pc_TC003957 | 0.28  | 0.74  |      | 1.8   | 0.02      | Up   | -1.91 | 0.16      |      | -0.45 | 0.64  |      | Uncharacterized protein                                                  |
| Pc_TC003958 | -1.29 | 0.14  |      | -3.08 | 0.01      | Down | 0.5   | 0.68      |      | -0.62 | 0.5   |      | Expressed protein                                                        |
| Pc_TC003964 | -0.13 | 0.88  |      | 0.64  | 0.41      |      | -1.35 | 0.26      |      | -2.44 | 0.01  | Down | Expressed protein                                                        |
| Pc_TC003975 | 0.73  | 0.03  |      | 0.94  | 0.03      |      | -0.79 | 0.37      |      | -1.19 | 0.03  | Down | Expressed protein                                                        |
| Pc_TC003987 | 0.63  | 0.3   |      | 2.18  | 0         | Up   | -0.87 | 0.44      |      | 0.24  | 0.76  |      | ammonium transporter 2                                                   |
| Pc_TC004004 | 2.19  | 0.05  |      | 2.64  | 0.03      | Up   | 1.56  | 0.35      |      | 2.33  | 0.05  |      | Glutathione S-transferase family protein                                 |
| Pc_TC004011 | -3.94 | ##### | Down | -5.54 | 2.01E-008 | Down | -0.73 | 0.48      |      | -4.65 | ##### | Down | NADH dehydrogenase 5B                                                    |
| Pc_TC004027 | 1.33  | 0     | Up   | 1.05  | 0.07      |      | -2.05 | 0.05      |      | 0.34  | 0.59  |      | Uncharacterized protein (Fragment)                                       |
| Pc_TC004029 | -3.04 | ##### | Down | 0.41  | 0.54      |      | -2.62 | 0.02      | Down | -1.46 | 0.05  | Down | Expressed protein                                                        |
| Pc_TC004033 | 2.21  | 0     | Up   | 0     | 3.04E-005 |      | 1.84  | 0.09      |      | 0.26  | 0.77  |      | villin 4                                                                 |
| Pc_TC004034 | -0.4  | 0.17  |      | -1.05 | 0.01      | Down | 1.45  | 0.09      |      | 0.57  | 0.24  |      | Aldolase-type TIM barrel family protein                                  |
| Pc_TC004054 | -1.69 | 0     | Down | 0.73  | 0.2       |      | -1.12 | 0.27      |      | -1.48 | 0.03  | Down | Expressed protein                                                        |
| Pc_TC004056 | 0.43  | 0.16  |      | 0.31  | 0.43      |      | -2.04 | 0.02      | Down | -0.19 | 0.69  |      | threonine aldolase 1                                                     |
| Pc_TC004058 | -0.02 | 0.99  |      | -0.19 | 0.79      |      | -0.36 | 0.74      |      | -1.47 | 0.05  | Down | P-loop containing nucleoside triphosphate hydrolases superfamily protein |
| Pc_TC004082 | 0.72  | 0.31  |      | 0.98  | 0.21      |      | -3.56 | 0.01      | Down | -2.21 | 0.03  | Down | Integrase-type DNA-binding superfamily protein                           |
| Pc_TC004102 | -0.45 | 0.35  |      | -1.87 | 0         | Down | 1.02  | 0.27      |      | 0.73  | 0.22  |      | Nuclear transport factor 2 (NTF2) family protein                         |
| Pc_TC004104 | -0.34 | 0.55  |      | -1.48 | 0.04      | Down | 2.11  | 0.03      | Up   | 0.16  | 0.82  |      | Protein of unknown function (DUF581)                                     |
| Pc_TC004110 | 0.46  | 0.27  |      | 0.66  | 0.2       |      | -2.78 | 0.01      | Down | -1.29 | 0.04  | Down | O-fucosyltransferase family protein                                      |
| Pc_TC004117 | 0.4   | 0.2   |      | 0.62  | 0.1       |      | -4.11 | 1.90E-005 | Down | -2.68 | ##### | Down | UDP-D-galactose 4-epimerase 2                                            |
| Pc_TC004125 | 0.54  | 0.18  |      | 0.97  | 0.05      |      | -3.66 | 0         | Down | -1.26 | 0.04  | Down | phloem protein 2-A13                                                     |
| Pc_TC004126 | -0.51 | 0.25  |      | -1.68 | 0         | Down | 1.22  | 0.18      |      | 0.59  | 0.31  |      | ACD1-like                                                                |
| Pc_TC004129 | -3.31 | 0.02  | Down | -1.75 | 0.19      |      | 0.43  | 0.77      |      | 0.14  | 0.94  |      | Putative harbinger transposase-derived nuclease                          |
| Pc_TC004137 | 6.16  | ##### | Up   | 0     | 0.04      |      | 3.79  | 0         | Up   | -0.37 | 0.83  |      | Putative transposase                                                     |
| Pc_TC004140 | -0.07 | 0.84  |      | -0.61 | 0.19      |      | 1.56  | 0.07      |      | 1.08  | 0.04  | Up   | adenylosuccinate synthase                                                |
| Pc_TC004153 | 0.49  | 0.09  |      | 0.65  | 0.08      |      | -1.71 | 0.04      | Down | -0.67 | 0.17  |      | OSBP(oxysterol binding protein)-related protein 3C                       |
| Pc_TC004156 | 0.63  | 0.04  |      | 0.74  | 0.06      |      | -3.28 | 0         | Down | 0.03  | 0.96  |      | Terpenoid cyclases/protein prenyltransferases superfamily protein        |
| Pc_TC004164 | -0.28 | 0.51  |      | -0.43 | 0.41      |      | 1.61  | 0.07      |      | 1.17  | 0.03  | Up   | DHHC-type zinc finger family protein                                     |
| Pc_TC004169 | -0.25 | 0.63  |      | -0.25 | 0.69      |      | 1.92  | 0.04      | Up   | 0.88  | 0.15  |      | Cytochrome P450 superfamily protein                                      |
| Pc_TC004171 | 3.5   | ##### | Up   | 0     | 0         |      | 3.73  | 0         | Up   | 0.49  | 0.62  |      | Expressed protein                                                        |
| Pc_TC004173 | 1.32  | 0     | Up   | -0.21 | 0.74      |      | 2.93  | 0         | Up   | 0.31  | 0.64  |      | Glycinamide ribonucleotide (GAR) synthetase                              |
| Pc_TC004185 | 2.53  | 0     | Up   | 0     | 0         |      | 2.12  | 0.07      |      | 0.45  | 0.66  |      | NAD(P)-linked oxidoreductase superfamily protein                         |
| Pc_TC004206 | -0.62 | 0.41  |      | 0.06  | 0.96      |      | -2.61 | 0.04      | Down | -5.4  | ##### | Down | Putative uncharacterized protein                                         |
| Pc_TC004211 | 1.22  | 0     | Up   | 1.85  | 7.36E-005 | Up   | -1.05 | 0.26      |      | 0.51  | 0.36  |      | FAD-binding Berberine family protein                                     |
| Pc_TC004219 | -1.57 | 0.02  | Down | 0.59  | 0.39      |      | 0.48  | 0.65      |      | -0.89 | 0.24  |      | Expressed protein                                                        |
| Pc_TC004223 | -1.07 | 0     | Down | 0.07  | 0.88      |      | 0.49  | 0.56      |      | -0.16 | 0.77  |      | Phosphatidylinositol 3- and 4-kinase family protein with FAT domain      |
| Pc_TC004252 | 0.02  | 0.97  |      | -0.1  | 0.85      |      | -1.78 | 0.07      |      | -1.5  | 0.02  | Down | Expressed protein                                                        |
| Pc_TC004253 | 0.6   | 0.11  |      | 1.07  | 0.02      | Up   | -2.35 | 0.02      | Down | -0.54 | 0.34  |      | glycerol-3-phosphate acyltransferase 3                                   |
| Pc_TC004255 | -0.97 | 0.14  |      | -2.02 | 0.01      | Down | 0.26  | 0.81      |      | 0.08  | 0.92  |      | Expressed protein                                                        |
| Pc_TC004262 | 1.04  | 0     | Up   | 1.08  | 0.01      | Up   | -2.97 | 0         | Down | 0.05  | 0.92  |      | NITRATE TRANSPORTER 1.8                                                  |
| Pc_TC004270 | 0.4   | 0.22  |      | 1.12  | 0.01      | Up   | 0.32  | 0.71      |      | 0.11  | 0.84  |      | Aluminium induced protein with YGL and LRDR motifs                       |
| Pc_TC004314 | -0.53 | 0.13  |      | -0.86 | 0.06      |      | 1.81  | 0.03      | Up   | 0.92  | 0.07  |      | GLU-ADT subunit B                                                        |
| Pc_TC004325 | 1.45  | 0.02  | Up   | 0.96  | 0.21      |      | 2.44  | 0.02      | Up   | 0.58  | 0.47  |      | lsd one like 1                                                           |
| Pc_TC004342 | 0.84  | 0.01  |      | 0.78  | 0.06      |      | -0.82 | 0.34      |      | 1.31  | 0.01  | Up   | phosphoserine aminotransferase                                           |
| Pc_TC004346 | 0.28  | 0.64  |      | 0.12  | 0.88      |      | 1.83  | 0.07      |      | 1.45  | 0.03  | Up   | Expressed protein                                                        |
| Pc_TC004350 | -1.2  | 0.06  |      | -1.67 | 0.03      | Down | 0.69  | 0.51      |      | -0.06 | 0.95  |      | Leucine-rich repeat protein kinase family protein                        |
| Pc_TC004365 | 0.51  | 0.21  |      | -2.12 | 0         | Down | 0.39  | 0.67      |      | 0.78  | 0.17  |      | unknown protein                                                          |



|             |       |       |      |       |           |      |       |           |      |       |       |      |                                                                                    |      |
|-------------|-------|-------|------|-------|-----------|------|-------|-----------|------|-------|-------|------|------------------------------------------------------------------------------------|------|
| Pc_TC004374 | 0.36  | 0.24  |      | 0.84  | 0.03      |      | -4.54 | 2.45E-006 | Down | -3.24 | ##### | Down | Raffinose synthase family protein                                                  |      |
| Pc_TC004382 | 1.92  | 0.01  | Up   | 0.39  | 0.7       |      | 1.6   | 0.17      |      | 1.78  | 0.03  | Up   | Aldolase-type TIM barrel family protein                                            |      |
| Pc_TC004386 | 0.28  | 0.48  |      | 0.45  | 0.36      |      | -1.19 | 0.2       |      | -1.44 | 0.02  | Down | Haloacid dehalogenase-like hydrolase (HAD) superfamily protein                     |      |
| Pc_TC004402 | 1.36  | 0.02  | Up   | 0.89  | 0.2       |      | 0.14  | 0.91      |      | 1.63  | 0.02  | Up   | Leucine-rich repeat protein kinase family protein                                  |      |
| Pc_TC004403 | -1.63 | 0.03  | Down | -1.12 | 0.17      |      | 0.19  | 0.87      |      | -1.44 | 0.08  |      | Expressed protein                                                                  |      |
| Pc_TC004418 | 0.33  | 0.4   |      | 0.51  | 0.3       |      | -2.28 | 0.02      | Down | -1.15 | 0.05  |      | Putative retroelement                                                              |      |
| Pc_TC004420 | 0.65  | 0.03  |      | 0.9   | 0.02      |      | -4.39 | 4.05E-006 | Down | -1.29 | 0.01  | Down | O-Glycosyl hydrolases family 17 protein                                            |      |
| Pc_TC004437 | -0.9  | 0     |      | -1.34 | 0         | Down | 0.59  | 0.47      |      | -0.39 | 0.42  |      | Serine-aspartate repeat-containing protein I                                       | bZIP |
| Pc_TC004443 | 0.18  | 0.67  |      | 0.57  | 0.26      |      | -1.19 | 0.21      |      | -1.7  | 0.01  | Down | phosphoenolpyruvate carboxylase kinase 2                                           |      |
| Pc_TC004445 | 1.41  | 0     | Up   | -0.02 | 0.98      |      | 0.64  | 0.52      |      | 0.51  | 0.43  |      | MAP kinase kinase 6                                                                |      |
| Pc_TC004453 | 0.03  | 1     |      | 0.46  | 0.65      |      | -3.3  | 0.04      | Down | -4.18 | 0     | Down | OSJNBa0079F16.16 protein                                                           |      |
| Pc_TC004461 | 0.68  | 0.45  |      | 0.34  | 0.77      |      | -4.02 | 0.03      | Down | -1.73 | 0.15  |      | Uncharacterized protein                                                            |      |
| Pc_TC004473 | 1.45  | 0.04  | Up   | 0     | 0         |      | 0.98  | 0.4       |      | -0.2  | 0.86  |      | Uncharacterized protein                                                            |      |
| Pc_TC004476 | -0.11 | 0.81  |      | 0.22  | 0.68      |      | 1.79  | 0.05      | Up   | 0.77  | 0.18  |      | fatty acid hydroxylase 2                                                           |      |
| Pc_TC004477 | 0.35  | 0.31  |      | 0.57  | 0.2       |      | -3.35 | 0         | Down | -1.87 | 0     | Down | alpha/beta-Hydrolases superfamily protein                                          |      |
| Pc_TC004485 | 0.37  | 0.37  |      | 1.11  | 0.02      | Up   | -1.65 | 0.09      |      | -0.85 | 0.15  |      | gamma-glutamyl transpeptidase 4                                                    |      |
| Pc_TC004495 | -1.49 | 0.01  | Down | -3.1  | 1.38E-005 | Down | 0.44  | 0.65      |      | -1.06 | 0.11  |      | alcohol dehydrogenase 1                                                            |      |
| Pc_TC004503 | -0.66 | 0.72  |      | 1.38  | 0.25      |      | -2.82 | 0.2       |      | 2.61  | 0.01  | Up   | TRICHOME BIREFRINGENCE-LIKE 19                                                     |      |
| Pc_TC004506 | 2.89  | 0.03  | Up   | 0     | 0.48      |      | 4.24  | 0.01      | Up   | 1.36  | 0.5   |      | 16:0delta9 desaturase 2                                                            |      |
| Pc_TC004516 | 1.32  | 0.02  | Up   | 1.78  | 0.01      | Up   | 0.13  | 0.91      |      | 1.66  | 0.02  | Up   | receptor kinase 1                                                                  |      |
| Pc_TC004535 | 0.59  | 0.27  |      | 0.92  | 0.15      |      | -4.4  | 0         | Down | -0.16 | 0.82  |      | S-adenosyl-L-methionine-dependent methyltransferases superfamily protein           |      |
| Pc_TC004543 | 0.64  | 0.36  |      | 1.46  | 0.05      |      | -1.75 | 0.17      |      | -2.07 | 0.03  | Down | Expressed protein                                                                  |      |
| Pc_TC004545 | 1.15  | 0.03  | Up   | 1.46  | 0.02      | Up   | -0.14 | 0.9       |      | 0.79  | 0.25  |      | chitinase A                                                                        |      |
| Pc_TC004550 | 0.32  | 0.28  |      | 0.45  | 0.23      |      | -1.73 | 0.04      | Down | -0.54 | 0.27  |      | F-box/RNI-like superfamily protein                                                 |      |
| Pc_TC004568 | 0.53  | 0.08  |      | 0.71  | 0.07      |      | -1.82 | 0.03      | Down | -0.53 | 0.29  |      | phosphatidyl serine synthase family protein                                        |      |
| Pc_TC004572 | 0.52  | 0.08  |      | 1.75  | 3.49E-006 | Up   | -3.04 | 0         | Down | -1.26 | 0.01  | Down | heat shock protein 70                                                              |      |
| Pc_TC004575 | 1.85  | 0.04  | Up   | 1.9   | 0.07      |      | -2.08 | 0.28      |      | -0.37 | 0.83  |      | Putative uncharacterized protein                                                   |      |
| Pc_TC004577 | 0.6   | 0.42  |      | 1.11  | 0.18      |      | -2.15 | 0.12      |      | -3.41 | 0     | Down | Tetratricopeptide repeat (TPR)-like superfamily protein                            |      |
| Pc_TC004579 | 1.05  | 0.07  |      | 0.92  | 0.18      |      | -3.33 | 0.01      | Down | -1.37 | 0.09  |      | Expressed protein                                                                  |      |
| Pc_TC004581 | 2.36  | 0.02  | Up   | 2.34  | 0.05      | Up   | 1.22  | 0.47      |      | 1.72  | 0.16  |      | Expressed protein                                                                  |      |
| Pc_TC004582 | 0.7   | 0.03  |      | 0.84  | 0.04      |      | 0.14  | 0.87      |      | 1.34  | 0.01  | Up   | serine-type endopeptidase inhibitors                                               |      |
| Pc_TC004585 | 0.19  | 0.51  |      | 0.31  | 0.39      |      | -1.43 | 0.09      |      | -1.09 | 0.03  | Down | thioredoxin H-type 1                                                               |      |
| Pc_TC004588 | 0.49  | 0.17  |      | 0.8   | 0.07      |      | -5.12 | 2.03E-006 | Down | -2.28 | 0     | Down | Uncharacterized protein                                                            |      |
| Pc_TC004592 | -2.04 | 0     | Down | -0.91 | 0.16      |      | -1.67 | 0.11      |      | -0.72 | 0.28  |      | Fumarylacetoacetate (FAA) hydrolase family                                         |      |
| Pc_TC004600 | -1.34 | 0     | Down | -1.12 | 0.01      | Down | 0.05  | 0.96      |      | -0.05 | 0.93  |      | beta-galactosidase 8                                                               |      |
| Pc_TC004602 | -1.07 | 0.02  | Down | -1.73 | 0         | Down | -1.48 | 0.12      |      | -1.48 | 0.02  | Down | gamete expressed 2                                                                 |      |
| Pc_TC004618 | 1.26  | 0     | Up   | 1.03  | 0.02      | Up   | -0.93 | 0.3       |      | 1.85  | 0     | Up   | laccase 2                                                                          |      |
| Pc_TC004621 | 0.39  | 0.33  |      | 0.32  | 0.53      |      | -1.99 | 0.04      | Down | -0.85 | 0.15  |      | Expressed protein                                                                  |      |
| Pc_TC004625 | -1.67 | 0.02  | Down | -1.83 | 0.03      | Down | 0.81  | 0.44      |      | 0.02  | 0.99  |      | bZIP transcription factor family protein                                           | bZIP |
| Pc_TC004628 | -0.37 | 0.31  |      | 1.15  | 0.01      | Up   | -0.86 | 0.33      |      | -0.62 | 0.25  |      | Expressed protein                                                                  |      |
| Pc_TC004635 | 0.06  | 0.95  |      | 0.36  | 0.65      |      | -4.34 | 0         | Down | -2.22 | 0.01  | Down | Expressed protein                                                                  |      |
| Pc_TC004638 | 3.4   | 0.01  | Up   | 0     | 0.48      |      | 2.24  | 0.24      |      | 1.04  | 0.66  |      | Glutaredoxin family protein                                                        |      |
| Pc_TC004654 | -0.73 | 0.53  |      | -3.33 | 0.04      | Down | -0.8  | 0.6       |      | -0.96 | 0.42  |      | SGNH hydrolase-type esterase superfamily protein                                   |      |
| Pc_TC004660 | -1.41 | 0.04  | Down | -1.54 | 0.05      |      | 2.06  | 0.04      | Up   | 0.79  | 0.26  |      | unknown protein                                                                    |      |
| Pc_TC004664 | 0.53  | 0.33  |      | 0.51  | 0.43      |      | -6.78 | 1.06E-005 | Down | -3.49 | ##### | Down | Expressed protein                                                                  |      |
| Pc_TC004672 | -0.04 | 0.98  |      | -0.58 | 0.5       |      | -2.91 | 0.03      | Down | -0.95 | 0.27  |      | Protein kinase superfamily protein                                                 |      |
| Pc_TC004675 | -3.83 | 0.04  | Down | -0.15 | 0.97      |      | -1.08 | 0.52      |      | -1.47 | 0.29  |      | Expressed protein                                                                  |      |
| Pc_TC004678 | 0.36  | 0.79  |      | 2.01  | 0.04      | Up   | -3.3  | 0.1       |      | -1.6  | 0.27  |      | Expressed protein                                                                  |      |
| Pc_TC004686 | -0.02 | 0.97  |      | 0.35  | 0.45      |      | -2.8  | 0         | Down | -1.23 | 0.03  | Down | Major Facilitator Superfamily with SPX (SYG1/Pho81/XPR1) domain-containing protein |      |
| Pc_TC004709 | 1.08  | 0.77  |      | 2.76  | 0.13      |      | 4.41  | 0.01      | Up   | 1.95  | 0.36  |      | Expressed protein                                                                  |      |
| Pc_TC004719 | -1.24 | 0.08  |      | 1.14  | 0.1       |      | 0     | 1.42E-005 |      | -4.28 | ##### | Down | 12-oxophytodienoate reductase 1                                                    |      |
| Pc_TC004724 | -2.99 | 0     | Down | 0.96  | 0.16      |      | -0.94 | 0.4       |      | -3.14 | 0     | Down | Expressed protein                                                                  |      |
| Pc_TC004730 | -0.09 | 0.88  |      | 0.92  | 0.14      |      | -3.88 | 0         | Down | -3.94 | ##### | Down | Expressed protein                                                                  |      |
| Pc_TC004735 | 2.46  | 0.01  | Up   | 0     | 0.07      |      | 2.54  | 0.06      |      | 0.3   | 0.88  |      | Expressed protein                                                                  |      |
| Pc_TC004736 | -2.42 | 0.02  | Down | -0.94 | 0.37      |      | -0.37 | 0.79      |      | -0.6  | 0.55  |      | Expressed protein                                                                  |      |
| Pc_TC004740 | -1.38 | 0.23  |      | -0.7  | 0.58      |      | -2.96 | 0.08      |      | -3.25 | 0.02  | Down | ARM repeat superfamily protein                                                     |      |
| Pc_TC004742 | 0.27  | 0.86  |      | -0.58 | 0.72      |      | 2.61  | 0.04      | Up   | 1.03  | 0.35  |      | Expressed protein                                                                  |      |
| Pc_TC004743 | -0.18 | 0.59  |      | -1.92 | 4.86E-005 | Down | 1.03  | 0.22      |      | 0.7   | 0.17  |      | Uncharacterised protein family (UPF0114)                                           |      |
| Pc_TC004746 | -1.03 | 0.12  |      | -1.7  | 0.04      | Down | -0.67 | 0.54      |      | -1.07 | 0.17  |      | Expressed protein                                                                  |      |
| Pc_TC004754 | 0.16  | 0.94  |      | 0.43  | 0.74      |      | 2.51  | 0.04      | Up   | 1.58  | 0.1   |      | Uncharacterized protein                                                            |      |
| Pc_TC004758 | 3.32  | ##### | Up   | 0     | 2.30E-005 |      | 3.47  | 0         | Up   | 1.74  | 0.02  | Up   | Expressed protein                                                                  |      |
| Pc_TC004765 | -1.3  | 0.22  |      | -3.64 | 0.02      | Down | -0.8  | 0.57      |      | -0.17 | 0.9   |      | Expressed protein                                                                  |      |

|             |       |       |      |       |           |      |  |       |      |      |       |      |      |                                                                          |
|-------------|-------|-------|------|-------|-----------|------|--|-------|------|------|-------|------|------|--------------------------------------------------------------------------|
| Pc_TC004801 | 1.99  | 0     | Up   | 0     | 8.53E-005 |      |  | 1.76  | 0.12 |      | 0.3   | 0.75 |      | Expressed protein                                                        |
| Pc_TC004811 | 0.76  | 0.15  |      | 0     | 3.61E-010 |      |  | 1.95  | 0.05 | Up   | -0.37 | 0.6  |      | phytoene desaturation 1                                                  |
| Pc_TC004816 | -0.15 | 0.69  |      | -0.25 | 0.6       |      |  | -0.97 | 0.28 |      | -1.26 | 0.02 | Down | Argonaute family protein                                                 |
| Pc_TC004822 | -0.38 | 0.68  |      | -2.57 | 0.03      | Down |  | -1.31 | 0.32 |      | -4    | 0    | Down | Expressed protein                                                        |
| Pc_TC004837 | -0.25 | 0.56  |      | -1.27 | 0.03      | Down |  | 0.16  | 0.86 |      | 0.39  | 0.5  |      | Expressed protein                                                        |
| Pc_TC004840 | 1.99  | 0.01  | Up   | 0     | 0.01      |      |  | 0.92  | 0.48 |      | -0.37 | 0.77 |      | Papain family cysteine protease                                          |
| Pc_TC004843 | 0.66  | 0.66  |      | 2.27  | 0.04      | Up   |  | -1.91 | 0.4  |      | -0.79 | 0.69 |      | Expressed protein                                                        |
| Pc_TC004844 | -1.2  | 0.21  |      | -2.71 | 0.03      | Down |  | 1.31  | 0.26 |      | -1.29 | 0.21 |      | ATP synthase alpha/beta family protein                                   |
| Pc_TC004846 | 0.15  | 0.88  |      | 0.49  | 0.59      |      |  | 2.46  | 0.03 | Up   | 1.82  | 0.02 | Up   | GDSL-like Lipase/Acylhydrolase superfamily protein                       |
| Pc_TC004851 | 0.52  | 0.66  |      | 1.95  | 0.05      | Up   |  | -4.3  | 0.06 |      | 0.21  | 0.91 |      | Expressed protein                                                        |
| Pc_TC004858 | 2.32  | 0     | Up   | 0     | 0.01      |      |  | 2.29  | 0.06 |      | 0.4   | 0.72 |      | Fatty acid/sphingolipid desaturase                                       |
| Pc_TC004864 | 0.33  | 0.67  |      | 1.39  | 0.07      |      |  | -3.76 | 0.01 | Down | -1.64 | 0.09 |      | Expressed protein                                                        |
| Pc_TC004876 | 0.04  | 0.95  |      | 0.04  | 0.96      |      |  | -1.43 | 0.18 |      | -1.84 | 0.01 | Down | tryptophan synthase beta type 2                                          |
| Pc_TC004919 | -2.54 | ##### | Down | -3.93 | 6.96E-009 | Down |  | 2.03  | 0.02 | Up   | -0.19 | 0.75 |      | Uncharacterized protein                                                  |
| Pc_TC004922 | 2.32  | 0     | Up   | 0     | 0.01      |      |  | 2.35  | 0.05 |      | 0.72  | 0.47 |      | Expressed protein                                                        |
| Pc_TC004937 | -1.62 | 0.03  | Down | -1.58 | 0.07      |      |  | -0.18 | 0.88 |      | -0.71 | 0.38 |      | Expressed protein                                                        |
| Pc_TC004945 | 1.87  | 0.02  | Up   | 0     | 0.01      |      |  | 2.06  | 0.1  |      | 0.24  | 0.87 |      | Expressed protein                                                        |
| Pc_TC004954 | -1.18 | 0.2   |      | 0.28  | 0.78      |      |  | -3.67 | 0.02 | Down | -1.64 | 0.12 |      | Expressed protein                                                        |
| Pc_TC004970 | 0.92  | 0.02  |      | 1.96  | 3.12E-005 | Up   |  | -3.84 | 0    | Down | -1.26 | 0.04 | Down | Mitochondrial substrate carrier family protein                           |
| Pc_TC004976 | 1.86  | 0.01  | Up   | 0     | 0         |      |  | 2.13  | 0.07 |      | 0.27  | 0.82 |      | aldehyde dehydrogenase 7B4                                               |
| Pc_TC004985 | 2.2   | 0     | Up   | 0     | 0         |      |  | 0.94  | 0.43 |      | -0.41 | 0.68 |      | Expressed protein                                                        |
| Pc_TC005008 | 0.66  | 0.97  |      | 1.87  | 0.44      |      |  | 3.83  | 0.03 | Up   | 1.43  | 0.58 |      | Expressed protein                                                        |
| Pc_TC005011 | 0.02  | 1     |      | 0.15  | 0.86      |      |  | -3.08 | 0.02 | Down | -1.74 | 0.05 | Down | Expressed protein                                                        |
| Pc_TC005022 | 1.35  | 0.03  | Up   | 0.88  | 0.26      |      |  | -0.45 | 0.71 |      | 2.04  | 0.01 | Up   | Uncharacterized protein                                                  |
| Pc_TC005026 | -0.83 | 0.17  |      | -1.54 | 0.04      | Down |  | -0.51 | 0.63 |      | -0.88 | 0.23 |      | ARM repeat superfamily protein                                           |
| Pc_TC005031 | -0.74 | 0.33  |      | 0.53  | 0.51      |      |  | -5.4  | 0    | Down | -2.96 | 0    | Down | stomagen                                                                 |
| Pc_TC005033 | -0.05 | 1     |      | 2.17  | 0.03      | Up   |  | 2.22  | 0.09 |      | 1.85  | 0.07 |      | OSJNBa0035013.13 protein                                                 |
| Pc_TC005039 | -0.11 | 0.99  |      | -0.62 | 0.67      |      |  | 2.95  | 0.02 | Up   | 2.15  | 0.02 | Up   | Uncharacterized protein                                                  |
| Pc_TC005054 | 2.06  | 0     | Up   | 0     | 5.43E-005 |      |  | 1.07  | 0.35 |      | -1.54 | 0.11 |      | plant glycogenin-like starch initiation protein 5                        |
| Pc_TC005058 | 3.22  | 0     | Up   | 0     | 0.27      |      |  | 3.23  | 0.03 | Up   | 1.11  | 0.5  |      | Expressed protein                                                        |
| Pc_TC005062 | 3.14  | ##### | Up   | 0     | 6.30E-005 | Up   |  | 2.82  | 0.01 | Up   | 0.27  | 0.77 |      | Putative uncharacterized protein Sb04g018075 (Fragment)                  |
| Pc_TC005063 | 2.17  | 0.03  | Up   | 0     | 0.11      |      |  | 1.9   | 0.2  |      | 0.33  | 0.89 |      | glutathione-disulfide reductase                                          |
| Pc_TC005072 | 1.4   | 0.61  |      | 3.31  | 0.04      | Up   |  | 3.41  | 0.07 |      | 3.83  | 0.01 | Up   | MATE efflux family protein                                               |
| Pc_TC005082 | 0.66  | 0.66  |      | 2.31  | 0.04      | Up   |  | -0.33 | 0.92 |      | 0.53  | 0.75 |      | Expressed protein                                                        |
| Pc_TC005089 | -3.29 | 0.01  | Down | -0.5  | 0.65      |      |  | 0.28  | 0.84 |      | 0.29  | 0.78 |      | Putative uncharacterized protein                                         |
| Pc_TC005106 | 2.51  | 0     | Up   | 0     | 0.02      |      |  | 2.38  | 0.06 |      | 1.6   | 0.1  |      | Homeobox BEL1-like protein                                               |
| Pc_TC005108 | -0.84 | 0.05  |      | -1.97 | 0         | Down |  | 1.64  | 0.06 |      | 0.9   | 0.11 |      | Plant protein of unknown function (DUF641)                               |
| Pc_TC005116 | 0.43  | 0.45  |      | 1.47  | 0.02      | Up   |  | -3.87 | 0    | Down | -2.35 | 0    | Down | Expressed protein                                                        |
| Pc_TC005157 | 0.66  | 0.66  |      | 2.34  | 0.04      | Up   |  | -0.17 | 0.99 |      | -0.37 | 0.89 |      | Expressed protein                                                        |
| Pc_TC005167 | 1.03  | 0.07  |      | 1.89  | 0         | Up   |  | -1.13 | 0.32 |      | -0.03 | 0.98 |      | Expressed protein                                                        |
| Pc_TC005169 | -1.34 | 0.23  |      | -0.53 | 0.67      |      |  | -5.08 | 0.01 | Down | -3.96 | 0.01 | Down | Expressed protein                                                        |
| Pc_TC005170 | 0.31  | 0.81  |      | 1.43  | 0.15      |      |  | -0.19 | 0.93 |      | -3.46 | 0.03 | Down | Muscle-specific protein 300                                              |
| Pc_TC005175 | 0.21  | 0.73  |      | 0.05  | 0.96      |      |  | -2.97 | 0.02 | Down | -0.5  | 0.51 |      | Os01g0617700 protein                                                     |
| Pc_TC005181 | 0.96  | 0.19  |      | 1.66  | 0.04      | Up   |  | -3.38 | 0.03 | Down | -0.23 | 0.83 |      | Expressed protein                                                        |
| Pc_TC005183 | 0.81  | 0.05  |      | 1.56  | 0         | Up   |  | -1.83 | 0.06 |      | 0.02  | 0.98 |      | Auxin-responsive family protein                                          |
| Pc_TC005193 | 3.45  | 0     | Up   | 0     | 0.48      |      |  | 3.31  | 0.05 | Up   | 1.36  | 0.5  |      | Putative uncharacterized protein                                         |
| Pc_TC005197 | 3.21  | ##### | Up   | 0     | 0.02      |      |  | 0.09  | 0.99 |      | -0.79 | 0.55 |      | Expressed protein                                                        |
| Pc_TC005202 | 2.32  | 0.03  | Up   | 0     | 0.15      |      |  | 1.4   | 0.39 |      | 0.63  | 0.72 |      | Expressed protein                                                        |
| Pc_TC005214 | -3.62 | 0     | Down | -0.26 | 0.77      |      |  | 0.82  | 0.46 |      | 0.2   | 0.81 |      | Expressed protein                                                        |
| Pc_TC005233 | 2.6   | 0.04  | Up   | 0     | 0.36      |      |  | 1.83  | 0.32 |      | -0.37 | 0.99 |      | Expressed protein                                                        |
| Pc_TC005239 | 1.13  | 0     | Up   | 1.21  | 0.01      | Up   |  | 0.58  | 0.51 |      | 0.98  | 0.07 |      | S-adenosyl-L-methionine-dependent methyltransferases superfamily protein |
| Pc_TC005242 | -3.58 | 0     | Down | -1.6  | 0.13      |      |  | -0.89 | 0.5  |      | -1.45 | 0.15 |      | Expressed protein                                                        |
| Pc_TC005246 | 1.77  | 0.09  |      | 2.41  | 0.02      | Up   |  | 0     | 0.07 |      | -0.54 | 0.78 |      | Expressed protein                                                        |
| Pc_TC005250 | 2.08  | 0.02  | Up   | 0     | 0.04      |      |  | 2.05  | 0.12 |      | 0.36  | 0.81 |      | Expressed protein                                                        |
| Pc_TC005253 | -2.85 | 0.01  | Down | -1.38 | 0.19      |      |  | 1.06  | 0.36 |      | -0.04 | 1    |      | Expressed protein                                                        |
| Pc_TC005258 | 1.14  | 0.16  |      | 2.13  | 0.01      | Up   |  | -4.08 | 0.03 | Down | -0.44 | 0.71 |      | Expressed protein                                                        |
| Pc_TC005260 | -4.68 | 0     | Down | -2.37 | 0.07      |      |  | 1.38  | 0.25 |      | -4.13 | 0    | Down | Expressed protein                                                        |
| Pc_TC005261 | 0.23  | 0.77  |      | 1.18  | 0.12      |      |  | -3.3  | 0.02 | Down | -2.18 | 0.02 | Down | Expressed protein                                                        |
| Pc_TC005268 | 3.94  | 0     | Up   | 0     | 0.67      |      |  | 3.36  | 0.07 |      | 2.43  | 0.19 |      | putative centromere-specific                                             |
| Pc_TC005271 | -0.86 | 0.26  |      | -0.72 | 0.41      |      |  | 2.37  | 0.03 | Up   | 1.02  | 0.18 |      | photosystem II reaction center W                                         |
| Pc_TC005275 | 1.54  | 0.34  |      | 1.96  | 0.21      |      |  | 3.26  | 0.04 | Up   | 2.71  | 0.04 | Up   | Expressed protein                                                        |
| Pc_TC005276 | 0.82  | 0.19  |      | 0.7   | 0.34      |      |  | -2.53 | 0.04 | Down | -1.8  | 0.04 | Down | F-BOX WITH WD-40 2                                                       |

|             |       |       |      |       |           |      |       |           |       |       |       |                                      |                                                               |      |
|-------------|-------|-------|------|-------|-----------|------|-------|-----------|-------|-------|-------|--------------------------------------|---------------------------------------------------------------|------|
| Pc_TC005279 | 1.78  | 0.03  | Up   | 0     | 0.01      |      | 1.09  | 0.4       | 0.43  | 0.7   |       | Expressed protein                    |                                                               |      |
| Pc_TC005288 | 2.02  | 0.03  | Up   | 1.43  | 0.2       |      | -1.5  | 0.42      | 0.29  | 0.87  |       | Expressed protein                    |                                                               |      |
| Pc_TC005295 | -1.25 | 0.04  | Down | -0.31 | 0.66      |      | 0.76  | 0.46      | -0.6  | 0.4   |       | gag protein                          |                                                               |      |
| Pc_TC005309 | 0.6   | 0.25  |      | 0.97  | 0.12      |      | 0     | 3.05E-007 | -3.37 | ##### | Down  | C2H2-type zinc finger family protein |                                                               |      |
| Pc_TC005314 | 0.3   | 0.55  |      | 1.2   | 0.04      | Up   | -3.09 | 0.01      | Down  | -1.98 | 0.01  | Down                                 | Expressed protein                                             |      |
| Pc_TC005315 | -1.92 | 0.05  | Down | -2.94 | 0.01      | Down | 1.87  | 0.1       |       | 0.06  | 0.98  |                                      | Expressed protein                                             |      |
| Pc_TC005325 | 4.37  | ##### | Up   | 0     | 0.27      |      | 1.43  | 0.43      |       | 1.3   | 0.4   |                                      | lipase 1                                                      |      |
| Pc_TC005327 | -1.3  | 0.38  |      | 0     | 0.03      |      | 3.78  | 0         | Up    | -4.08 | 0.04  | Down                                 | aldehyde dehydrogenase 2B4                                    |      |
| Pc_TC005333 | -0.55 | 0.43  |      | 1.86  | 0.01      | Up   | -1.44 | 0.22      |       | -1.55 | 0.07  |                                      | potassium channel beta subunit 1                              |      |
| Pc_TC005336 | 1.25  | 0.48  |      | 1.38  | 0.45      |      | 3.65  | 0.02      | Up    | 2.53  | 0.06  |                                      | Expressed protein                                             |      |
| Pc_TC005337 | -1.23 | 0.03  | Down | -0.99 | 0.13      |      | 0.45  | 0.65      |       | -0.62 | 0.36  |                                      | Pentatricopeptide repeat (PPR) superfamily protein            |      |
| Pc_TC005359 | -1.43 | 0.01  | Down | -0.83 | 0.19      |      | 0.84  | 0.38      |       | -0.58 | 0.38  |                                      | Expressed protein                                             |      |
| Pc_TC005363 | 2.86  | 0     | Up   | 0     | 0.02      |      | 2.6   | 0.04      | Up    | 0.67  | 0.55  |                                      | Expressed protein                                             |      |
| Pc_TC005368 | 0.04  | 0.89  |      | -1.13 | 0         | Down | 1.73  | 0.04      | Up    | 1.03  | 0.04  | Up                                   | serine transhydroxymethyltransferase 1                        |      |
| Pc_TC005370 | 2.19  | 0     | Up   | 0     | 1.74E-005 |      | 2.83  | 0.01      | Up    | 0.25  | 0.77  |                                      | fatty acid desaturase 5                                       |      |
| Pc_TC005373 | -4.19 | ##### | Down | -3.89 | 0         | Down | -1.37 | 0.25      |       | -4.64 | ##### | Down                                 | Expressed protein                                             |      |
| Pc_TC005379 | 0.57  | 0.34  |      | 0.8   | 0.25      |      | -7.15 | 3.53E-005 | Down  | -2.78 | 0     | Down                                 | Expressed protein                                             |      |
| Pc_TC005395 | -0.72 | 0.44  |      | 1.44  | 0.08      |      | -1.02 | 0.45      |       | -2.83 | 0.02  | Down                                 | heat shock factor 1                                           | HSF  |
| Pc_TC005398 | 1     | 0.03  |      | 1.3   | 0.02      | Up   | -2.4  | 0.03      | Down  | 0.76  | 0.22  |                                      | Expressed protein                                             |      |
| Pc_TC005409 | 2.18  | 0.02  | Up   | 0     | 0.07      |      | 1.57  | 0.27      |       | 0.21  | 0.94  |                                      | Expressed protein                                             |      |
| Pc_TC005427 | -2.35 | 0.04  | Down | 1.33  | 0.13      |      | 1.03  | 0.4       |       | -0.61 | 0.58  |                                      | ribosomal protein L22                                         |      |
| Pc_TC005428 | 2.31  | 0     | Up   | 0     | 0         |      | 2.15  | 0.07      |       | 0.42  | 0.67  |                                      | Expressed protein                                             |      |
| Pc_TC005430 | -1.89 | 0.03  | Down | -1.53 | 0.12      |      | -0.92 | 0.46      |       | -0.96 | 0.29  |                                      | Putative uncharacterized protein Sb05g008350                  |      |
| Pc_TC005440 | 0.08  | 1     |      | 3.76  | 0.01      | Up   | 0     | 0.53      |       | 0     | 0.54  |                                      | Expressed protein                                             |      |
| Pc_TC005468 | 1.7   | 0.01  | Up   | 1.42  | 0.08      |      | 1.47  | 0.2       |       | 0.76  | 0.38  |                                      | Expressed protein                                             |      |
| Pc_TC005469 | 0.73  | 0.05  |      | 1.19  | 0.01      | Up   | -3.02 | 0         | Down  | -0.92 | 0.11  |                                      | Expressed protein                                             |      |
| Pc_TC005471 | 4.25  | 0     | Up   | 0     | 0.67      |      | 2.75  | 0.18      |       | 1.63  | 0.49  |                                      | Expressed protein                                             |      |
| Pc_TC005480 | 2.6   | 0.04  | Up   | 0     | 0.36      |      | 2.67  | 0.1       |       | 0.63  | 0.82  |                                      | Expressed protein                                             |      |
| Pc_TC005482 | 2.4   | 0     | Up   | 0     | 0.02      |      | 1.63  | 0.22      |       | 0.14  | 0.96  |                                      | Sec63 Brl domains-containing protein                          |      |
| Pc_TC005483 | 0.45  | 0.48  |      | 1.6   | 0.02      | Up   | -1.09 | 0.34      |       | 0.14  | 0.87  |                                      | FUNCTIONS IN: molecular function unknown                      |      |
| Pc_TC005484 | -0.09 | 0.91  |      | 0.03  | 0.99      |      | 2.62  | 0.01      | Up    | 1.31  | 0.06  |                                      | Transmembrane amino acid transporter family protein           |      |
| Pc_TC005487 | 0.18  | 0.85  |      | 0.86  | 0.3       |      | -2.92 | 0.04      | Down  | -1.28 | 0.19  |                                      | Expressed protein                                             |      |
| Pc_TC005492 | 0.88  | 0.15  |      | 2.39  | 0         | Up   | -1.71 | 0.15      |       | -0.06 | 0.95  |                                      | jasmonate-zim-domain protein 8                                | Tify |
| Pc_TC005511 | 0.1   | 0.91  |      | 0.88  | 0.25      |      | -2.47 | 0.06      |       | -2.54 | 0.01  | Down                                 | Expressed protein                                             |      |
| Pc_TC005514 | 1.26  | 0.01  | Up   | 0.27  | 0.68      |      | 0.79  | 0.43      |       | 0.13  | 0.85  |                                      | RmlC-like cupins superfamily protein                          |      |
| Pc_TC005517 | 0.28  | 0.69  |      | 2.63  | 8.19E-005 | Up   | -1.1  | 0.35      |       | -0.58 | 0.49  |                                      | GTP binding Elongation factor Tu family protein               |      |
| Pc_TC005522 | 0.75  | 0.13  |      | 0.54  | 0.38      |      | 0.22  | 0.83      |       | 1.61  | 0.01  | Up                                   | receptor lectin kinase                                        |      |
| Pc_TC005535 | -0.62 | 0.51  |      | 1.89  | 0.02      | Up   | -1.34 | 0.32      |       | -2.14 | 0.05  |                                      | Ribosomal protein S5/Elongation factor G/III/V family protein |      |
| Pc_TC005547 | 1.66  | 0.48  |      | 1.64  | 0.53      |      | 3.59  | 0.05      | Up    | 0.63  | 0.96  |                                      | Expressed protein                                             |      |
| Pc_TC005548 | -0.84 | 0.23  |      | -1.31 | 0.12      |      | 2.33  | 0.03      | Up    | -0.07 | 0.94  |                                      | Dormancy/auxin associated family protein                      |      |
| Pc_TC005553 | 3.25  | 0     | Up   | 0     | 0.15      |      | 1.4   | 0.39      |       | 0.63  | 0.72  |                                      | ATPase,AAA-type,CDC48 protein                                 |      |
| Pc_TC005554 | -0.72 | 0.12  |      | -1.44 | 0.02      | Down | 0.79  | 0.39      |       | -0.23 | 0.7   |                                      | cysteine-rich RLK (RECEPTOR-like protein kinase) 10           |      |
| Pc_TC005557 | 1.59  | 0.03  | Up   | 0.11  | 0.95      |      | -0.79 | 0.57      |       | 0     | 1     |                                      | cytochrome P450,family 79,subfamily B,polypeptide 3           |      |
| Pc_TC005560 | -0.64 | 0.46  |      | 0.83  | 0.33      |      | -3.85 | 0.01      | Down  | -2.73 | 0.01  | Down                                 | Uncharacterized protein                                       |      |
| Pc_TC005563 | 2.03  | 0     | Up   | -4.26 | 0         | Down | 1.11  | 0.34      |       | -1.24 | 0.21  |                                      | Expressed protein                                             |      |
| Pc_TC005599 | 1.12  | 0.01  | Up   | 0     | 9.74E-014 |      | 1.2   | 0.21      |       | -0.02 | 0.98  |                                      | GATA type zinc finger transcription factor family protein     | LIM  |
| Pc_TC005603 | 1.9   | 0.01  | Up   | 0     | 0         |      | 1.44  | 0.22      |       | -1.1  | 0.29  |                                      | Expressed protein                                             |      |
| Pc_TC005615 | 4.53  | ##### | Up   | 0     | 0.11      |      | 1.2   | 0.46      |       | 0.21  | 0.97  |                                      | Expressed protein                                             |      |
| Pc_TC005627 | 2.38  | 0     | Up   | 0     | 0         |      | 2.05  | 0.07      |       | 0.3   | 0.76  |                                      | Ribosomal protein L16p/L10e family protein                    |      |
| Pc_TC005631 | 4.25  | 0     | Up   | 0     | 0.67      |      | 3.5   | 0.06      |       | 0.63  | 0.96  |                                      | Expressed protein                                             |      |
| Pc_TC005634 | 2.46  | 0.04  | Up   | 2.32  | 0.08      |      | 1.09  | 0.59      |       | 1.47  | 0.32  |                                      | Uncharacterized protein                                       |      |
| Pc_TC005638 | 0.12  | 0.88  |      | 0.08  | 0.94      |      | -2.39 | 0.06      |       | -2.35 | 0.01  | Down                                 | Expressed protein                                             |      |
| Pc_TC005652 | 1.56  | 0.04  | Up   | 0     | 0         |      | 1.49  | 0.22      |       | -0.11 | 0.95  |                                      | Expressed protein                                             |      |
| Pc_TC005654 | 1.51  | 0     | Up   | 1.38  | 0.03      | Up   | -0.34 | 0.75      |       | 2.6   | ##### | Up                                   | cytochrome P450,family 76,subfamily C,polypeptide 1           |      |
| Pc_TC005659 | 3.54  | 0     | Up   | 0     | 0.36      |      | 2.26  | 0.19      |       | 0.95  | 0.64  |                                      | sumo conjugation enzyme 1                                     |      |
| Pc_TC005664 | 0.57  | 0.19  |      | 1.14  | 0.03      | Up   | -2.62 | 0.01      | Down  | -1.85 | 0.01  | Down                                 | calmodulin-like 11                                            |      |
| Pc_TC005679 | 0.86  | 0.01  |      | 0.36  | 0.44      |      | -0.29 | 0.74      |       | 1.33  | 0.01  | Up                                   | O-acyltransferase (WSD1-like) family protein                  |      |
| Pc_TC005686 | 1.25  | 0.48  |      | 0     | 0.36      |      | 4.34  | 0         | Up    | 0     | 0.24  |                                      | Expressed protein                                             |      |
| Pc_TC005694 | -1.71 | 0.02  | Down | -1.09 | 0.17      |      | -0.57 | 0.61      |       | -0.87 | 0.27  |                                      | protein,putative,unclassified                                 |      |
| Pc_TC005705 | 0.57  | 0.31  |      | 1.45  | 0.02      | Up   | 0.69  | 0.51      |       | 0.72  | 0.3   |                                      | Aldolase-type TIM barrel family protein                       |      |
| Pc_TC005709 | 2.3   | 0.13  |      | 2.56  | 0.1       |      | 2.83  | 0.11      |       | 2.99  | 0.03  | Up                                   | Expressed protein                                             |      |
| Pc_TC005726 | -0.13 | 0.84  |      | 0.38  | 0.58      |      | -1.45 | 0.2       |       | -1.61 | 0.04  | Down                                 | Expressed protein                                             |      |

|             |       |       |      |       |           |      |       |           |      |       |       |      |                                                                          |
|-------------|-------|-------|------|-------|-----------|------|-------|-----------|------|-------|-------|------|--------------------------------------------------------------------------|
| Pc_TC005734 | 2.57  | ##### | Up   | 0     | 0         |      | 1.9   | 0.09      |      | 0.43  | 0.64  |      | Uncharacterized protein                                                  |
| Pc_TC005737 | 2.89  | 0.03  | Up   | 0     | 0.48      |      | 1.92  | 0.35      |      | 0     | 0.35  |      | Putative uncharacterized protein Sb09g017840                             |
| Pc_TC005739 | 0.95  | 0.54  |      | 2.47  | 0.04      | Up   | 1.5   | 0.37      |      | 0.36  | 0.91  |      | Expressed protein                                                        |
| Pc_TC005744 | 2.54  | 0     | Up   | 0     | 0.07      |      | 1.85  | 0.19      |      | 0.11  | 1     |      | 26S proteasome,regulatory subunit Rpn7;Proteasome component (PCI) domain |
| Pc_TC005773 | 1.32  | 0.21  |      | 2.06  | 0.05      | Up   | 0.63  | 0.71      |      | 1.38  | 0.22  |      | Putative uncharacterized protein Sb03g044730                             |
| Pc_TC005777 | 0.14  | 0.82  |      | 1.06  | 0.1       |      | -2.58 | 0.03      | Down | -2.65 | 0     | Down | xyloglucan endotransglucosylase/hydrolase 24                             |
| Pc_TC005786 | 0     | ##### |      | -5.26 | 1.82E-005 | Down | -4.82 | 0         | Down | 0     | ##### |      | Expressed protein                                                        |
| Pc_TC005794 | -1.58 | 0.03  | Down | -0.6  | 0.46      |      | -1.86 | 0.12      |      | -1.39 | 0.09  |      | Expressed protein                                                        |
| Pc_TC005803 | 0.49  | 0.83  |      | 2.9   | 0.01      | Up   | 0     | 0.14      |      | -0.96 | 0.68  |      | Expressed protein                                                        |
| Pc_TC005806 | 2.15  | 0.08  |      | 2.64  | 0.04      | Up   | 0     | 0.19      |      | 1     | 0.56  |      | Expressed protein                                                        |
| Pc_TC005814 | 0.19  | 0.88  |      | 1.26  | 0.16      |      | -3.61 | 0.03      | Down | -0.43 | 0.7   |      | Expressed protein                                                        |
| Pc_TC005830 | 0.4   | 0.33  |      | 0.89  | 0.07      |      | -2.55 | 0.01      | Down | -1.69 | 0.01  | Down | cytochrome P450, family 89, subfamily A, polypeptide 2                   |
| Pc_TC005838 | 3.09  | ##### | Up   | 0     | 0         |      | 1.69  | 0.14      |      | -0.78 | 0.45  |      | heat shock protein 90.1                                                  |
| Pc_TC005840 | 0.57  | 0.07  |      | 0.68  | 0.1       |      | -4.71 | 2.17E-006 | Down | -2.32 | ##### | Down | beta-hydroxylase 1                                                       |
| Pc_TC005841 | 0.53  | 0.15  |      | 1.06  | 0.02      | Up   | -2.12 | 0.03      | Down | -0.36 | 0.52  |      | Expressed protein                                                        |
| Pc_TC005845 | -4.83 | 0     | Down | -0.94 | 0.4       |      | 0.15  | 0.93      |      | 0.33  | 0.74  |      | Lysozyme                                                                 |
| Pc_TC005846 | 7.12  | ##### | Up   | 0     | 0.36      |      | 6.06  | 1.10E-005 | Up   | -0.37 | 0.99  |      | Putative uncharacterized protein                                         |
| Pc_TC005847 | -1.91 | 0.01  | Down | -0.08 | 0.93      |      | -2.54 | 0.03      | Down | -0.5  | 0.51  |      | Expressed protein                                                        |
| Pc_TC005855 | -2.09 | 0.29  |      | -0.53 | 0.82      |      | 3.37  | 0.01      | Up   | 1.31  | 0.28  |      | Expressed protein                                                        |
| Pc_TC005861 | 0.53  | 0.07  |      | 0.77  | 0.04      |      | -3.34 | 0         | Down | -2.14 | ##### | Down | Uncharacterized protein                                                  |
| Pc_TC005864 | -0.61 | 0.04  |      | -1.15 | 0         | Down | 1.67  | 0.06      |      | 0.82  | 0.09  |      | chaperonin-60alpha                                                       |
| Pc_TC005865 | 0.38  | 0.33  |      | 0.82  | 0.09      |      | -2.39 | 0.02      | Down | -1.85 | 0     | Down | Transducin/WD40 repeat-like superfamily protein                          |
| Pc_TC005866 | 0.8   | 0.04  |      | 1     | 0.04      | Up   | -1.35 | 0.16      |      | -0.82 | 0.17  |      | Protein kinase superfamily protein                                       |
| Pc_TC005889 | -0.74 | 0.5   |      | -0.01 | 1         |      | 0     | 0         |      | -2.9  | 0.03  | Down | Expressed protein                                                        |
| Pc_TC005892 | 0.63  | 0.2   |      | 0.71  | 0.24      |      | -3.42 | 0         | Down | -1.09 | 0.11  |      | Uncharacterized protein                                                  |
| Pc_TC005897 | 0.59  | 0.45  |      | -0.16 | 0.89      |      | 2.35  | 0.04      | Up   | 1.52  | 0.06  |      | cinnamyl alcohol dehydrogenase 6                                         |
| Pc_TC005900 | 2     | 0.05  | Up   | 0     | 0.09      |      | 1.03  | 0.52      |      | -0.37 | 0.87  |      | Expressed protein                                                        |
| Pc_TC005906 | -1.52 | 0.04  | Down | -1.1  | 0.18      |      | -0.09 | 0.95      |      | -0.46 | 0.56  |      | Uncharacterized protein                                                  |
| Pc_TC005908 | -3.49 | ##### | Down | -0.01 | 0.99      |      | -1.29 | 0.22      |      | -2.62 | 0     | Down | Uncharacterized protein                                                  |
| Pc_TC005915 | -0.5  | 0.47  |      | 0.23  | 0.77      |      | 2.4   | 0.02      | Up   | 1.74  | 0.01  | Up   | Plant protein of unknown function (DUF827)                               |
| Pc_TC005919 | 3     | 0     | Up   | 0     | 0.04      |      | 1.62  | 0.24      |      | 0.36  | 0.81  |      | Nucleic acid-binding,OB-fold-like protein                                |
| Pc_TC005921 | -0.45 | 0.22  |      | -1.14 | 0.02      | Down | 0.9   | 0.29      |      | 0.21  | 0.69  |      | phosphoenolpyruvate carboxylase 4                                        |
| Pc_TC005935 | 2.57  | 0     | Up   | 0     | 0.02      |      | 1.71  | 0.18      |      | 0.53  | 0.65  |      | Expressed protein                                                        |
| Pc_TC005939 | 1.36  | 0.28  |      | 2.38  | 0.04      | Up   | 2.02  | 0.18      |      | 1.95  | 0.1   |      | gibberellin 2-oxidase 6                                                  |
| Pc_TC005941 | 3.08  | 0.18  |      | 1.06  | 0.98      |      | 4.41  | 0.03      | Up   | 3.63  | 0.07  |      | Expressed protein                                                        |
| Pc_TC005958 | 2.6   | 0.04  | Up   | 0     | 0.36      |      | 2.46  | 0.14      |      | 0.21  | 1     |      | Expressed protein                                                        |
| Pc_TC005963 | 1.42  | 0.03  | Up   | 1.99  | 0.01      | Up   | -3.5  | 0.01      | Down | 0.26  | 0.76  |      | Expressed protein                                                        |
| Pc_TC005967 | 0.02  | 1     |      | 0.46  | 0.67      |      | -4.14 | 0.02      | Down | -2.43 | 0.05  |      | Expressed protein                                                        |
| Pc_TC005987 | 0.53  | 0.47  |      | 0.92  | 0.25      |      | -3.53 | 0.02      | Down | -2.99 | 0.01  | Down | PH01B001E05.5 protein                                                    |
| Pc_TC006011 | 2.89  | 0.02  | Up   | 0     | 0.36      |      | 2.55  | 0.12      |      | 0.8   | 0.73  |      | Expressed protein                                                        |
| Pc_TC006012 | 0.44  | 0.62  |      | -0.84 | 0.46      |      | -3.3  | 0.04      | Down | -3.6  | 0.01  | Down | Expressed protein                                                        |
| Pc_TC006015 | 3.78  | 0.01  | Up   | 0     | 0.67      |      | 2.5   | 0.25      |      | 1.63  | 0.49  |      | Expressed protein                                                        |
| Pc_TC006016 | 0.28  | 0.58  |      | -0.07 | 0.91      |      | -3.1  | 0.01      | Down | -0.92 | 0.18  |      | Expressed protein                                                        |
| Pc_TC006020 | 4.4   | 0     | Up   | 0     | 0.67      |      | 2.96  | 0.14      |      | 2.63  | 0.14  |      | Expressed protein                                                        |
| Pc_TC006023 | -0.8  | 0.1   |      | -0.51 | 0.37      |      | -0.59 | 0.54      |      | -1.29 | 0.04  | Down | Expressed protein                                                        |
| Pc_TC006034 | 0.08  | 1     |      | 1.64  | 0.53      |      | 3.9   | 0.03      | Up   | 2.63  | 0.14  |      | Expressed protein                                                        |
| Pc_TC006037 | 0.2   | 0.87  |      | 2.12  | 0.01      | Up   | -2.63 | 0.11      |      | -1.25 | 0.29  |      | Expressed protein                                                        |
| Pc_TC006038 | -2.78 | 0.02  | Down | -0.89 | 0.43      |      | 0.1   | 0.96      |      | -0.37 | 0.73  |      | Putative uncharacterized protein                                         |
| Pc_TC006042 | 0.66  | 0.17  |      | 1.84  | 0         | Up   | -3.78 | 0         | Down | -1.37 | 0.04  | Down | FTSH protease 6                                                          |
| Pc_TC006045 | 1.66  | 0.48  |      | 3.38  | 0.04      | Up   | 0.5   | 1         |      | 0     | 0.54  |      | Expressed protein                                                        |
| Pc_TC006046 | 1.66  | 0.06  |      | 2.88  | 0         | Up   | 0     | 0.02      |      | -2.18 | 0.15  |      | Uncharacterized protein                                                  |
| Pc_TC006048 | -3.38 | 0.02  | Down | -3.4  | 0.03      | Down | -0.31 | 0.85      |      | -0.03 | 1     |      | Uncharacterized protein                                                  |
| Pc_TC006051 | 0.12  | 0.82  |      | 0.77  | 0.21      |      | -1.64 | 0.12      |      | -1.73 | 0.02  | Down | UDP-Glycosyltransferase superfamily protein                              |
| Pc_TC006053 | 3.4   | 0.1   |      | 3.38  | 0.14      |      | 3.96  | 0.08      |      | 3.87  | 0.04  | Up   | Expressed protein                                                        |
| Pc_TC006062 | 1.96  | 0     | Up   | 0     | 9.94E-005 |      | 1.54  | 0.17      |      | -0.02 | 1     |      | Putative N-acetyltransferase ycf52-like protein                          |
| Pc_TC006079 | 1.66  | 0.07  |      | 3.13  | 0         | Up   | 0     | 0.03      |      | -1.75 | 0.25  |      | Expressed protein                                                        |
| Pc_TC006089 | 0.57  | 0.12  |      | 0.64  | 0.17      |      | -2.79 | 0         | Down | -0.97 | 0.09  |      | Expressed protein                                                        |
| Pc_TC006099 | 0.13  | 0.93  |      | 0.4   | 0.71      |      | -5.2  | 0.01      | Down | -0.49 | 0.66  |      | Expressed protein                                                        |
| Pc_TC006100 | 0.12  | 0.92  |      | 0.19  | 0.87      |      | -1.28 | 0.35      |      | -2.74 | 0.02  | Down | cytochrome P450, family 71, subfamily B, polypeptide 4                   |
| Pc_TC006101 | 0.27  | 0.36  |      | 0.54  | 0.14      |      | -1.79 | 0.04      | Down | -0.68 | 0.17  |      | FORMS APLOID AND BINUCLEATE CELLS 1A                                     |
| Pc_TC006102 | 0.48  | 0.34  |      | 1.93  | 0         | Up   | -3.73 | 0         | Down | -2.7  | 0     | Down | ARM repeat superfamily protein                                           |
| Pc_TC006107 | 2.4   | ##### | Up   | 0     | 2.95E-011 |      | 1.79  | 0.07      |      | 0.11  | 0.88  |      | Uncharacterized protein                                                  |

|             |       |       |      |       |      |      |       |           |      |       |       |      |                                                                          |         |
|-------------|-------|-------|------|-------|------|------|-------|-----------|------|-------|-------|------|--------------------------------------------------------------------------|---------|
| Pc_TC006133 | 0.35  | 0.59  |      | 0.57  | 0.44 |      | -5.94 | 0         | Down | -2.36 | 0.01  | Down | Expressed protein                                                        |         |
| Pc_TC006147 | 0.68  | 0.37  |      | 0.96  | 0.25 |      | 0     | 0         |      | -3.08 | 0.01  | Down | Expressed protein                                                        |         |
| Pc_TC006151 | 0.02  | 0.96  |      | -0.12 | 0.83 |      | 2.23  | 0.01      | Up   | 0.78  | 0.17  |      | P-loop containing nucleoside triphosphate hydrolases superfamily protein |         |
| Pc_TC006160 | 0.47  | 0.21  |      | 1.13  | 0.02 | Up   | -2.81 | 0         | Down | -1.76 | 0     | Down | similar to RCD one 3                                                     |         |
| Pc_TC006161 | 2.34  | 0.05  | Up   | 1.64  | 0.28 |      | 1.57  | 0.37      |      | 2.47  | 0.05  | Up   | Expressed protein                                                        |         |
| Pc_TC006165 | 3.08  | 0.01  | Up   | 0     | 0.36 |      | 1.31  | 0.53      |      | 0.21  | 1     |      | DEA(D/H)-box RNA helicase family protein                                 |         |
| Pc_TC006170 | 2.08  | 0.03  | Up   | 2.41  | 0.02 | Up   | 0.43  | 0.83      |      | 1.76  | 0.11  |      | Expressed protein                                                        |         |
| Pc_TC006179 | -2.38 | 0.03  | Down | -1.53 | 0.17 |      | 0.44  | 0.74      |      | 0.44  | 0.64  |      | AP2/B3-like transcriptional factor family protein                        | ABI3VP1 |
| Pc_TC006184 | 0.52  | 0.36  |      | 1.12  | 0.08 |      | -2.42 | 0.04      | Down | -1.24 | 0.1   |      | Expressed protein                                                        |         |
| Pc_TC006201 | 0.78  | 0.59  |      | -0.36 | 0.92 |      | 3.37  | 0.01      | Up   | 2.67  | 0.01  | Up   | Phototropic-responsive NPH3 family protein                               |         |
| Pc_TC006205 | 0.54  | 0.46  |      | -0.32 | 0.74 |      | 0     | 0         |      | -5.96 | ##### | Down | Expressed protein                                                        |         |
| Pc_TC006211 | 2.34  | 0.05  | Up   | 0     | 0.27 |      | 1.27  | 0.5       |      | 0.3   | 0.97  |      | Expressed protein                                                        |         |
| Pc_TC006213 | 3.25  | 0     | Up   | 0     | 0.36 |      | 2.5   | 0.13      |      | 0.21  | 1     |      | organic cation/carnitine transporter4                                    |         |
| Pc_TC006228 | -1.73 | 0.11  |      | -3.75 | 0.01 | Down | 0.85  | 0.5       |      | -0.28 | 0.81  |      | Expressed protein                                                        |         |
| Pc_TC006229 | 3.99  | 0     | Up   | 0     | 0.67 |      | 3.75  | 0.04      | Up   | 2.8   | 0.1   |      | Expressed protein                                                        |         |
| Pc_TC006238 | -1.58 | 0.09  |      | -2.71 | 0.02 | Down | -1.68 | 0.21      |      | -0.87 | 0.36  |      | Expressed protein                                                        |         |
| Pc_TC006245 | 4.49  | ##### | Up   | 0     | 0.01 |      | 4.29  | 0         | Up   | 2.85  | 0     | Up   | Mannose-binding lectin superfamily protein                               |         |
| Pc_TC006248 | -0.31 | 0.81  |      | 0     | 0.01 |      | -0.8  | 0.6       |      | -2.77 | 0.04  | Down | Expressed protein                                                        |         |
| Pc_TC006254 | -0.17 | 0.79  |      | 0.08  | 0.92 |      | -3.68 | 0         | Down | -2.05 | 0.01  | Down | Disease resistance protein RPM1                                          |         |
| Pc_TC006265 | 1.51  | 0.11  |      | 2.42  | 0.01 | Up   | 0.97  | 0.5       |      | 1.54  | 0.14  |      | NB-ARC domain-containing disease resistance protein                      |         |
| Pc_TC006273 | 0.49  | 0.53  |      | 1.67  | 0.03 | Up   | -1.26 | 0.34      |      | -2.85 | 0.01  | Down | sulfite oxidase                                                          |         |
| Pc_TC006275 | 0.15  | 0.73  |      | 0.46  | 0.36 |      | -1.35 | 0.16      |      | -1.21 | 0.05  | Down | COBRA-like protein-7 precursor                                           |         |
| Pc_TC006276 | 2.4   | 0.01  | Up   | 1.51  | 0.18 |      | -1.15 | 0.55      |      | 2.05  | 0.05  | Up   | Uncharacterized protein                                                  |         |
| Pc_TC006296 | 0.36  | 0.21  |      | 0.76  | 0.04 |      | -2.87 | 0         | Down | -1.34 | 0.01  | Down | eukaryotic release factor 1-3                                            |         |
| Pc_TC006298 | 2.52  | ##### | Up   | 0     | 0    |      | 2.25  | 0.04      | Up   | 0.47  | 0.6   |      | Expressed protein                                                        |         |
| Pc_TC006302 | 2.34  | 0.01  | Up   | 0     | 0.07 |      | 1.77  | 0.21      |      | 0.11  | 1     |      | transducin family protein / WD-40 repeat family protein                  |         |
| Pc_TC006311 | 1.2   | 0.03  | Up   | 0.82  | 0.22 |      | -0.52 | 0.63      |      | 0.85  | 0.22  |      | Expressed protein                                                        |         |
| Pc_TC006316 | 0.52  | 0.12  |      | 0.4   | 0.35 |      | -0.08 | 0.92      |      | 1.62  | 0     | Up   | pleiotropic drug resistance 12                                           |         |
| Pc_TC006317 | 0.48  | 0.37  |      | 1.56  | 0.01 | Up   | -3.49 | 0         | Down | -2.19 | 0     | Down | Chaperone DnaJ-domain superfamily protein                                |         |
| Pc_TC006326 | -0.61 | 0.6   |      | -4.33 | 0.02 | Down | 1.18  | 0.36      |      | -1.07 | 0.37  |      | Expressed protein                                                        |         |
| Pc_TC006328 | -0.57 | 0.25  |      | -1.13 | 0.07 |      | 2.33  | 0.01      | Up   | 1.2   | 0.04  | Up   | Uncharacterized protein                                                  |         |
| Pc_TC006330 | -0.11 | 1     |      | -0.36 | 0.92 |      | 3.27  | 0.01      | Up   | 2.33  | 0.03  | Up   | Peroxidase superfamily protein                                           |         |
| Pc_TC006334 | -1.03 | 0.17  |      | -0.07 | 0.95 |      | -3.02 | 0.02      | Down | -1.44 | 0.1   |      | Expressed protein                                                        |         |
| Pc_TC006336 | -0.12 | 0.95  |      | 0.39  | 0.73 |      | -2.44 | 0.13      |      | -3.9  | 0.01  | Down | Expressed protein                                                        |         |
| Pc_TC006337 | 0.35  | 0.33  |      | -0.36 | 0.46 |      | 1.43  | 0.1       |      | 1.71  | 0     | Up   | Major facilitator superfamily protein                                    |         |
| Pc_TC006339 | -2.34 | 0.11  |      | 0.23  | 0.9  |      | -2.17 | 0.21      |      | -3.37 | 0.04  | Down | Expressed protein                                                        |         |
| Pc_TC006346 | -0.01 | 1     |      | 0.78  | 0.38 |      | -3.58 | 0.02      | Down | -2.46 | 0.03  | Down | Plant U-Box 15                                                           |         |
| Pc_TC006361 | 0.87  | 0.11  |      | 0.93  | 0.15 |      | -3.63 | 0         | Down | -1.04 | 0.16  |      | Expressed protein                                                        |         |
| Pc_TC006366 | 4.4   | 0     | Up   | 0     | 0.67 |      | 3.71  | 0.04      | Up   | 1.95  | 0.36  |      | importin alpha isoform 4                                                 |         |
| Pc_TC006373 | 3.66  | 0     | Up   | 0     | 0.27 |      | 1.94  | 0.25      |      | 0.63  | 0.78  |      | RP non-ATPase subunit 8A                                                 |         |
| Pc_TC006379 | 1.82  | 0.29  |      | 2.38  | 0.15 |      | 3.44  | 0.04      | Up   | 2.29  | 0.15  |      | Putative uncharacterized protein OSJNBb0115F21.5                         |         |
| Pc_TC006381 | 0.8   | 0.1   |      | 0.43  | 0.49 |      | -3.89 | 0         | Down | -1.37 | 0.05  |      | Expressed protein                                                        |         |
| Pc_TC006387 | 0.54  | 0.75  |      | 1.31  | 0.33 |      | 2.86  | 0.04      | Up   | 1.27  | 0.32  |      | homeodomain GLABROUS 2                                                   | HB      |
| Pc_TC006410 | -0.14 | 0.9   |      | 1.44  | 0.08 |      | -3.63 | 0.02      | Down | -0.6  | 0.55  |      | slufate transporter 2;1                                                  |         |
| Pc_TC006416 | 1.99  | 0     | Up   | 0     | 0    |      | 1.19  | 0.31      |      | -0.46 | 0.65  |      | SecY protein transport family protein                                    |         |
| Pc_TC006419 | 3.26  | ##### | Up   | 0     | 0.07 |      | 2.39  | 0.08      |      | 1     | 0.42  |      | Uncharacterized protein                                                  |         |
| Pc_TC006426 | -3.09 | 0.04  | Down | -0.53 | 0.71 |      | 0.58  | 0.69      |      | -0.22 | 0.89  |      | Uncharacterized protein                                                  |         |
| Pc_TC006442 | 2.08  | 0.54  |      | 4.15  | 0.03 | Up   | 2.83  | 0.32      |      | 3.21  | 0.15  |      | Expressed protein                                                        |         |
| Pc_TC006453 | 0.97  | 0.49  |      | 1.71  | 0.19 |      | 3.27  | 0.02      | Up   | 2.24  | 0.05  |      | cellulose synthase-like D5                                               |         |
| Pc_TC006459 | 0.33  | 0.43  |      | 0.34  | 0.51 |      | -1.98 | 0.05      | Down | -1.47 | 0.02  | Down | response regulator 6                                                     |         |
| Pc_TC006462 | -0.82 | 0.35  |      | -1.05 | 0.3  |      | -1.68 | 0.21      |      | 1.92  | 0.01  | Up   | Acyl-coenzyme A dehydrogenase                                            |         |
| Pc_TC006465 | 2.4   | 0.01  | Up   | 0     | 0.04 |      | 2.66  | 0.04      | Up   | 0.5   | 0.72  |      | Expressed protein                                                        |         |
| Pc_TC006481 | 0.36  | 0.27  |      | 0.75  | 0.07 |      | -1.95 | 0.03      | Down | -0.59 | 0.25  |      | mitogen-activated protein kinase 3                                       |         |
| Pc_TC006500 | 0     | 0.44  |      | 0     | 0.48 |      | 3.47  | 0.03      | Up   | 1.63  | 0.38  |      | Expressed protein                                                        |         |
| Pc_TC006507 | 2.01  | 0.03  | Up   | 2.15  | 0.04 | Up   | 1.44  | 0.32      |      | 0.69  | 0.6   |      | Expressed protein                                                        |         |
| Pc_TC006516 | -1.61 | 0.04  | Down | -1.29 | 0.14 |      | 0.33  | 0.78      |      | -0.63 | 0.44  |      | TCOP-1/cpn60 chaperonin family protein                                   |         |
| Pc_TC006527 | 0.55  | 0.25  |      | 0.67  | 0.25 |      | -5.07 | 5.26E-005 | Down | -3.07 | ##### | Down | Uncharacterized protein                                                  |         |
| Pc_TC006544 | 2.49  | 0.01  | Up   | 0     | 0.09 |      | 1.29  | 0.4       |      | -0.54 | 0.78  |      | Expressed protein                                                        |         |
| Pc_TC006548 | 0.57  | 0.43  |      | 1.66  | 0.03 | Up   | -2.03 | 0.12      |      | -0.99 | 0.27  |      | Expressed protein                                                        |         |
| Pc_TC006555 | -0.39 | 0.77  |      | 0.75  | 0.5  |      | -4.67 | 0.03      | Down | -2.22 | 0.11  |      | Expressed protein                                                        |         |
| Pc_TC006558 | -0.16 | 0.88  |      | -0.68 | 0.5  |      | 0     | 0         |      | -4.7  | 0     | Down | Expressed protein                                                        |         |
| Pc_TC006561 | 0     | 1     |      | -0.65 | 0.53 |      | 2.39  | 0.03      | Up   | 1.03  | 0.22  |      | myb domain protein 5                                                     | MYB     |

|             |       |       |      |       |           |      |       |           |       |       |       |                   |                                                                               |         |
|-------------|-------|-------|------|-------|-----------|------|-------|-----------|-------|-------|-------|-------------------|-------------------------------------------------------------------------------|---------|
| Pc_TC006577 | 0.14  | 0.88  |      | 1.71  | 0.03      | Up   | 0     | 0         | -1.71 | 0.08  |       | Expressed protein |                                                                               |         |
| Pc_TC006579 | 0.58  | 0.07  |      | 0.62  | 0.14      |      | -1.87 | 0.03      | Down  | -1.18 | 0.03  | Down              | Uncharacterised protein family                                                |         |
| Pc_TC006586 | -0.57 | 0.5   |      | 0.3   | 0.75      |      | 0     | 0         |       | -2.83 | 0.01  | Down              | AWPM-19-like family protein                                                   |         |
| Pc_TC006588 | 0.58  | 0.19  |      | 0.79  | 0.15      |      | -3.4  | 0         | Down  | -1.36 | 0.04  | Down              | G-box binding factor 1                                                        | bZIP    |
| Pc_TC006614 | -0.99 | 0.39  |      | -1.75 | 0.19      |      | 0.02  | 1         |       | -2.77 | 0.04  | Down              | OO Ba0005L10-OO Ba0081K17.19 protein                                          |         |
| Pc_TC006618 | -0.15 | 0.8   |      | -1.65 | 0.02      | Down | 1.15  | 0.25      |       | -1.31 | 0.07  |                   | Expressed protein                                                             |         |
| Pc_TC006625 | 0.69  | 0.06  |      | -0.79 | 0.12      |      | 0.93  | 0.29      |       | 2.39  | ##### | Up                | Peroxidase superfamily protein                                                |         |
| Pc_TC006631 | 0.59  | 0.74  |      | 2.64  | 0.02      | Up   | -0.13 | 1         |       | 0.28  | 0.94  |                   | Expressed protein                                                             |         |
| Pc_TC006662 | 1.66  | 0.48  |      | 1.64  | 0.53      |      | 4.96  | 0         | Up    | 3.58  | 0.02  | Up                | Expressed protein                                                             |         |
| Pc_TC006665 | 0.2   | 0.7   |      | 0.14  | 0.83      |      | -3.03 | 0.01      | Down  | -0.99 | 0.15  |                   | Expressed protein                                                             |         |
| Pc_TC006666 | 1.66  | 0.48  |      | 3.64  | 0.02      | Up   | 1.5   | 0.6       |       | 3.08  | 0.06  |                   | Expressed protein                                                             |         |
| Pc_TC006671 | -0.03 | 1     |      | -0.94 | 0.54      |      | 2.73  | 0.03      | Up    | 1.75  | 0.08  |                   | phytochrome-associated protein 1                                              | AUX/IAA |
| Pc_TC006684 | 4.42  | ##### | Up   | 0     | 0.36      |      | 2.86  | 0.07      |       | 1.21  | 0.5   |                   | Ribophorin I                                                                  |         |
| Pc_TC006686 | 0.52  | 0.4   |      | -0.42 | 0.59      |      | -2.96 | 0.02      | Down  | -1.72 | 0.04  | Down              | Putative uncharacterized protein                                              |         |
| Pc_TC006689 | -1.24 | 0.05  |      | -1.7  | 0.03      | Down | 0.75  | 0.47      |       | -0.25 | 0.73  |                   | Expressed protein                                                             |         |
| Pc_TC006690 | 0     | 1     |      | -0.19 | 0.92      |      | -3.74 | 0.05      | Down  | -1.62 | 0.21  |                   | Expressed protein                                                             |         |
| Pc_TC006715 | -0.1  | 0.9   |      | 0.45  | 0.54      |      | -2.69 | 0.03      | Down  | -2.79 | 0     | Down              | NAC (No Apical Meristem) domain transcriptional regulator superfamily protein | NAC     |
| Pc_TC006722 | 0.86  | 0     |      | 1.02  | 0.01      | Up   | -2.21 | 0.01      | Down  | -0.09 | 0.85  |                   | Chaperonin-like RbcX protein                                                  |         |
| Pc_TC006726 | 0.49  | 0.96  |      | 1.28  | 0.58      |      | 4.15  | 0.01      | Up    | 2.56  | 0.09  |                   | UDP-Glycosyltransferase superfamily protein                                   |         |
| Pc_TC006728 | 0.58  | 0.42  |      | 1.09  | 0.17      |      | -5.08 | 0         | Down  | -0.96 | 0.3   |                   | NB-ARC domain-containing disease resistance protein                           |         |
| Pc_TC006729 | 0.06  | 0.91  |      | -0.45 | 0.46      |      | 1.97  | 0.04      | Up    | 1.29  | 0.03  | Up                | Transmembrane amino acid transporter family protein                           |         |
| Pc_TC006737 | 0.59  | 0.07  |      | 0.8   | 0.06      |      | -2.29 | 0.01      | Down  | -1.07 | 0.04  | Down              | unknown protein                                                               |         |
| Pc_TC006740 | 0.29  | 0.45  |      | 0.28  | 0.56      |      | -1.63 | 0.08      |       | -1.16 | 0.04  | Down              | Protein kinase superfamily protein                                            |         |
| Pc_TC006741 | -1.56 | 0.06  |      | -3.5  | 0         | Down | 0.36  | 0.76      |       | -0.58 | 0.5   |                   | Nodulin MtN3 family protein                                                   |         |
| Pc_TC006745 | 1.82  | 0.14  |      | 2.56  | 0.03      | Up   | 0     | 0.14      |       | -1.96 | 0.4   |                   | Expressed protein                                                             |         |
| Pc_TC006759 | 0.69  | 0.06  |      | 0.53  | 0.26      |      | -1.87 | 0.05      | Down  | -0.53 | 0.35  |                   | PRA1 (Prenylated rab acceptor) family protein                                 |         |
| Pc_TC006760 | 0.19  | 0.65  |      | -0.48 | 0.39      |      | 1.65  | 0.07      |       | 1.37  | 0.01  | Up                | acyl carrier protein 4                                                        |         |
| Pc_TC006771 | 4.89  | ##### | Up   | 0     | 0.67      |      | 4.2   | 0.01      | Up    | 0.95  | 0.81  |                   | DEAD/DEAH box RNA helicase family protein                                     |         |
| Pc_TC006773 | -0.25 | 0.59  |      | 0.55  | 0.31      |      | -1.92 | 0.06      |       | -1.42 | 0.03  | Down              | Expressed protein                                                             |         |
| Pc_TC006774 | 1.6   | 0     | Up   | 0     | 5.34E-013 |      | 1.57  | 0.1       |       | 0.27  | 0.68  |                   | Putative uncharacterized protein P0416D03.2                                   |         |
| Pc_TC006779 | 0.21  | 0.49  |      | 0.64  | 0.1       |      | -3.28 | 0         | Down  | -1.75 | 0     | Down              | beta-amylase 1                                                                |         |
| Pc_TC006815 | 1.59  | 0.18  |      | 1.34  | 0.34      |      | 4.55  | 0         | Up    | 3.24  | 0     | Up                | Expressed protein                                                             |         |
| Pc_TC006818 | 0.12  | 0.79  |      | 0.3   | 0.59      |      | -2.12 | 0.04      | Down  | -0.86 | 0.17  |                   | Os09g0397100 protein                                                          |         |
| Pc_TC006828 | 1.01  | 0.05  |      | 1.02  | 0.1       |      | -1.34 | 0.22      |       | -1.75 | 0.02  | Down              | Curculin-like (mannose-binding) lectin family protein                         |         |
| Pc_TC006852 | -0.06 | 0.9   |      | -0.71 | 0.19      |      | 1.89  | 0.03      | Up    | 1.21  | 0.03  | Up                | unknown protein                                                               |         |
| Pc_TC006855 | 0.66  | 0.66  |      | 0.87  | 0.57      |      | 3.89  | 0         | Up    | 3.45  | 0     | Up                | Protein of Unknown Function (DUF239)                                          |         |
| Pc_TC006858 | 0.44  | 0.16  |      | 0.68  | 0.09      |      | -1.69 | 0.05      | Down  | -0.54 | 0.28  |                   | alpha/beta-Hydrolases superfamily protein                                     |         |
| Pc_TC006863 | -1    | 0.13  |      | -3.14 | 0         | Down | 1.07  | 0.31      |       | 0.41  | 0.58  |                   | Calcium-dependent lipid-binding (CaLB domain) family protein                  |         |
| Pc_TC006865 | 0.92  | 0.19  |      | 1.54  | 0.05      | Up   | 0.55  | 0.65      |       | 0.25  | 0.79  |                   | Phosphorylase superfamily protein                                             |         |
| Pc_TC006870 | 0.62  | 0.35  |      | 0.06  | 0.96      |      | -3.47 | 0.01      | Down  | -2.35 | 0.01  | Down              | Expressed protein                                                             |         |
| Pc_TC006880 | -0.85 | 0.01  |      | -1.35 | 0         | Down | 1.69  | 0.05      | Up    | 0.72  | 0.15  |                   | Uncharacterized protein                                                       |         |
| Pc_TC006882 | 0.48  | 0.12  |      | 1.12  | 0         | Up   | -3.13 | 0         | Down  | -1.76 | 0     | Down              | Protein of unknown function (DUF3537)                                         |         |
| Pc_TC006887 | -0.53 | 0.12  |      | -1.07 | 0.02      | Down | 1.63  | 0.05      |       | 0.9   | 0.07  |                   | Tetratricopeptide repeat (TPR)-like superfamily protein                       |         |
| Pc_TC006893 | 0.66  | 0.29  |      | 0.58  | 0.43      |      | 0.09  | 0.94      |       | 1.89  | 0.01  | Up                | cytochrome P450, family 76, subfamily C, polypeptide 4                        |         |
| Pc_TC006895 | 0.48  | 0.1   |      | 0.62  | 0.1       |      | -4.69 | 9.43E-007 | Down  | -2.84 | ##### | Down              | Calcium-binding EF-hand family protein                                        |         |
| Pc_TC006898 | 1.57  | 0.05  | Up   | 0     | 0         |      | 1.4   | 0.26      |       | -0.37 | 0.76  |                   | Expressed protein                                                             |         |
| Pc_TC006899 | -0.57 | 0.12  |      | -0.72 | 0.12      |      | -1.48 | 0.1       |       | -2.29 | ##### | Down              | UDP-Glycosyltransferase superfamily protein                                   |         |
| Pc_TC006962 | 0.56  | 0.57  |      | 1.84  | 0.04      | Up   | -3.82 | 0.04      | Down  | -1.7  | 0.18  |                   | Expressed protein                                                             |         |
| Pc_TC006976 | 0.58  | 0.06  |      | -0.02 | 0.95      |      | 0.04  | 0.96      |       | 1.41  | 0     | Up                | pleiotropic drug resistance 11                                                |         |
| Pc_TC006995 | 0.42  | 0.65  |      | 1.7   | 0.05      | Up   | -1.2  | 0.4       |       | -0.22 | 0.86  |                   | Leucine-rich repeat transmembrane protein kinase                              |         |
| Pc_TC007020 | 0.54  | 0.31  |      | 1.51  | 0.01      | Up   | -1.77 | 0.1       |       | -1.2  | 0.1   |                   | heat shock protein 18.2                                                       |         |
| Pc_TC007034 | 0.4   | 0.78  |      | -0.94 | 0.58      |      | 2.76  | 0.03      | Up    | 1.99  | 0.05  | Up                | Expressed protein                                                             |         |
| Pc_TC007046 | -0.64 | 0.14  |      | -1.54 | 0.01      | Down | 1.71  | 0.05      |       | 0.73  | 0.19  |                   | TraB family protein                                                           |         |
| Pc_TC007051 | 0.66  | 0.58  |      | 2.96  | 0         | Up   | 0     | 0.03      |       | -2.96 | 0.1   |                   | Expressed protein                                                             |         |
| Pc_TC007057 | 0.17  | 0.67  |      | 0.24  | 0.63      |      | -2.07 | 0.03      | Down  | -1.58 | 0.01  | Down              | DNA/RNA polymerases superfamily protein                                       |         |
| Pc_TC007073 | -0.47 | 0.3   |      | -1.17 | 0.04      | Down | 1.48  | 0.1       |       | 0.8   | 0.16  |                   | Pentatricopeptide repeat (PPR) superfamily protein                            |         |
| Pc_TC007074 | 0.87  | 0.04  |      | 1.84  | 0         | Up   | -1.52 | 0.13      |       | 0.06  | 0.92  |                   | Zinc finger (C3HC4-type RING finger) family protein                           |         |
| Pc_TC007091 | -0.95 | 0.23  |      | 0.67  | 0.4       |      | 0     | 0         |       | -4.57 | 0     | Down              | Putative uncharacterized protein B1056G08.104                                 |         |
| Pc_TC007107 | 0.87  | 0.09  |      | 1.2   | 0.05      | Up   | -0.32 | 0.76      |       | 0.39  | 0.55  |                   | chitinase A                                                                   |         |
| Pc_TC007118 | -3.12 | 0     | Down | -2.88 | 0.01      | Down | 1.42  | 0.21      |       | 0.1   | 0.93  |                   | Peroxisomal membrane 22 kDa (Mpv17/PMP22) family protein                      |         |
| Pc_TC007121 | 0.39  | 0.23  |      | 1.68  | 3.64E-005 | Up   | -2.89 | 0         | Down  | -1.45 | 0.01  | Down              | cytochrome P450, family 81, subfamily D, polypeptide 2                        |         |
| Pc_TC007123 | 0.23  | 0.87  |      | -0.2  | 0.92      |      | 2.89  | 0.02      | Up    | 1.7   | 0.07  |                   | NAC domain containing protein 73                                              | NAC     |

|             |       |       |      |       |           |      |       |      |      |       |       |      |                                                                          |           |
|-------------|-------|-------|------|-------|-----------|------|-------|------|------|-------|-------|------|--------------------------------------------------------------------------|-----------|
| Pc_TC007124 | 0.57  | 0.28  |      | 1.53  | 0.01      | Up   | 0.16  | 0.88 |      | -0.05 | 0.95  |      | Peroxidase superfamily protein                                           |           |
| Pc_TC007127 | 1.89  | 0.19  |      | 0.06  | 1         |      | 0     | 0.26 |      | 3.33  | 0.01  | Up   | F-box domain containing protein,expressed                                |           |
| Pc_TC007130 | -0.57 | 0.29  |      | -0.51 | 0.43      |      | 1.89  | 0.05 | Up   | 1.16  | 0.06  |      | Subtilase family protein                                                 |           |
| Pc_TC007138 | 0.36  | 0.34  |      | 0.61  | 0.2       |      | -3.05 | 0    | Down | -1.64 | 0.01  | Down | Expressed protein                                                        |           |
| Pc_TC007144 | -0.21 | 0.83  |      | 0.09  | 0.95      |      | 1.98  | 0.08 |      | 1.66  | 0.04  | Up   | leucine-rich repeat transmembrane protein kinase family protein          |           |
| Pc_TC007146 | -0.41 | 0.52  |      | 0.38  | 0.58      |      | 2.48  | 0.01 | Up   | 1.02  | 0.14  |      | Cytochrome P450 superfamily protein                                      |           |
| Pc_TC007150 | -0.6  | 0.29  |      | -0.95 | 0.16      |      | 2.15  | 0.03 | Up   | 1.15  | 0.07  |      | FKBP-like peptidyl-prolyl cis-trans isomerase family protein             |           |
| Pc_TC007152 | 0.87  | 0.46  |      | -0.4  | 0.85      |      | 3.81  | 0    | Up   | 2.19  | 0.03  | Up   | flavanone 3-hydroxylase                                                  |           |
| Pc_TC007169 | 0.17  | 0.85  |      | 1.5   | 0.05      |      | -2.32 | 0.09 |      | -2.73 | 0.01  | Down | cytochrome P450,family 72,subfamily A,polypeptide 15                     |           |
| Pc_TC007180 | 0.31  | 0.33  |      | 0.32  | 0.44      |      | -1.6  | 0.07 |      | -1.09 | 0.04  | Down | unknown protein                                                          |           |
| Pc_TC007202 | 0.26  | 0.47  |      | 0.43  | 0.35      |      | -1.94 | 0.04 | Down | -1.4  | 0.01  | Down | plasma membrane intrinsic protein 1A                                     |           |
| Pc_TC007227 | 0.56  | 0.1   |      | 0.59  | 0.18      |      | -2    | 0.03 | Down | -0.77 | 0.15  |      | Expressed protein                                                        |           |
| Pc_TC007236 | -1.41 | 0.33  |      | 1.98  | 0.04      | Up   | -1.3  | 0.45 |      | -0.01 | 1     |      | PDI-like 5-1                                                             |           |
| Pc_TC007248 | 0.79  | 0.26  |      | 0.48  | 0.58      |      | 1.07  | 0.35 |      | 2     | 0.01  | Up   | Expressed protein                                                        |           |
| Pc_TC007251 | -0.16 | 0.94  |      | 1.06  | 0.29      |      | -3.82 | 0.04 | Down | -1.37 | 0.27  |      | Expressed protein                                                        |           |
| Pc_TC007253 | 0.28  | 0.45  |      | 0.63  | 0.17      |      | -2.45 | 0.01 | Down | -1.59 | 0.01  | Down | myb domain protein 12                                                    | MYB       |
| Pc_TC007259 | 0.04  | 0.97  |      | 1.3   | 0.07      |      | -3.57 | 0.01 | Down | -0.82 | 0.32  |      | UniRef90 Q10J11                                                          |           |
| Pc_TC007271 | 2.75  | ##### | Up   | -5.3  | 1.43E-007 | Down | 2.14  | 0.03 | Up   | 0.03  | 0.98  |      | polyubiquitin 10                                                         |           |
| Pc_TC007291 | -0.6  | 0.1   |      | -0.41 | 0.37      |      | 1.71  | 0.05 | Up   | 1.05  | 0.04  | Up   | Transducin/WD40 repeat-like superfamily protein                          |           |
| Pc_TC007307 | 0.58  | 0.15  |      | -0.1  | 0.85      |      | 0.67  | 0.45 |      | 1.32  | 0.02  | Up   | cytochrome P450,family 704,subfamily A,polypeptide 2                     |           |
| Pc_TC007342 | -0.72 | 0.32  |      | -2.23 | 0.02      | Down | 2.78  | 0.01 | Up   | 0.79  | 0.29  |      | basic helix-loop-helix (bHLH) DNA-binding superfamily protein            | bHLH      |
| Pc_TC007343 | 0.44  | 0.66  |      | -0.87 | 0.49      |      | 2.16  | 0.07 |      | 1.76  | 0.05  | Up   | nudix hydrolase homolog 16                                               |           |
| Pc_TC007346 | -0.93 | 0.04  |      | -1.58 | 0.01      | Down | 1.51  | 0.09 |      | 0.5   | 0.39  |      | conserved peptide upstream open reading frame 5                          |           |
| Pc_TC007354 | 0.66  | 0.81  |      | 0.64  | 0.84      |      | 0     | 0.26 |      | 3.46  | 0     | Up   | Expressed protein                                                        |           |
| Pc_TC007366 | 0.46  | 0.39  |      | 1.06  | 0.08      |      | -3.73 | 0    | Down | -2.98 | 0     | Down | Integrase-type DNA-binding superfamily protein                           | AP2-EREBP |
| Pc_TC007368 | -0.21 | 0.76  |      | 1.47  | 0.03      | Up   | -1.61 | 0.17 |      | -1.87 | 0.03  | Down | Ribosomal protein S3Ae                                                   |           |
| Pc_TC007383 | -3.83 | 0     | Down | -3.26 | 0.02      | Down | -3.4  | 0.03 | Down | -3.28 | 0.01  | Down | Ribosomal L38e protein family                                            |           |
| Pc_TC007387 | -0.24 | 0.59  |      | -0.95 | 0.1       |      | 1.14  | 0.21 |      | 1.35  | 0.02  | Up   | Leucine-rich repeat protein kinase family protein                        |           |
| Pc_TC007402 | -0.28 | 0.52  |      | -0.11 | 0.83      |      | 2.01  | 0.03 | Up   | 1.27  | 0.02  | Up   | Protein kinase family protein                                            |           |
| Pc_TC007403 | 0.69  | 0.13  |      | 1.37  | 0.01      | Up   | -1.4  | 0.17 |      | -0.44 | 0.49  |      | SCARECROW-like 8                                                         | GRAS      |
| Pc_TC007406 | 2.25  | 0.05  | Up   | 0     | 0.2       |      | 0.73  | 0.73 |      | 1.29  | 0.37  |      | aldehyde dehydrogenase 3H1                                               |           |
| Pc_TC007407 | 2.68  | 0     | Up   | 0     | 0.01      |      | 1.92  | 0.13 |      | 0.44  | 0.71  |      | Expressed protein                                                        |           |
| Pc_TC007416 | 3.34  | ##### | Up   | 0     | 0.02      |      | 2.2   | 0.09 |      | 1.4   | 0.17  |      | Major facilitator superfamily protein                                    |           |
| Pc_TC007426 | 1.12  | 0.01  | Up   | 0     | 1.97E-014 |      | 1.29  | 0.17 |      | -0.85 | 0.19  |      | aminopeptidase M1                                                        |           |
| Pc_TC007427 | 2.17  | 0.03  | Up   | 0     | 0.11      |      | 1.2   | 0.46 |      | -0.2  | 0.98  |      | ankyrin repeat family protein                                            |           |
| Pc_TC007429 | 0.34  | 0.5   |      | -0.14 | 0.83      |      | 0.11  | 0.91 |      | 1.65  | 0.01  | Up   | syntaxin of plants 132                                                   |           |
| Pc_TC007433 | 0.32  | 0.31  |      | 0.74  | 0.06      |      | -2.19 | 0.01 | Down | -2.05 | 0     | Down | diacylglycerol kinase 5                                                  |           |
| Pc_TC007444 | 0.07  | 0.9   |      | 0.77  | 0.19      |      | -2.19 | 0.04 | Down | -1.42 | 0.04  | Down | Putative uncharacterized protein                                         |           |
| Pc_TC007448 | 1.14  | 0.03  | Up   | 0     | 1.25E-009 |      | 1.17  | 0.25 |      | -0.61 | 0.4   |      | cytochrome P450,family 711,subfamily A,polypeptide 1                     |           |
| Pc_TC007454 | 1.03  | 0.06  |      | 1.38  | 0.03      | Up   | -0.65 | 0.55 |      | -0.17 | 0.82  |      | xyloglucan endotransglucosylase/hydrolase 28                             |           |
| Pc_TC007457 | 0.5   | 0.3   |      | 0.7   | 0.22      |      | -2.18 | 0.04 | Down | -0.74 | 0.26  |      | ARABIDOPSIS THALIANA PEROXYGENASE 2                                      |           |
| Pc_TC007460 | 0.25  | 0.67  |      | 0.5   | 0.46      |      | -2.23 | 0.05 |      | -1.57 | 0.04  | Down | OSINBa0035I04.5 protein                                                  |           |
| Pc_TC007468 | -0.06 | 0.95  |      | -1.43 | 0.08      |      | 2.36  | 0.02 | Up   | 1.47  | 0.03  | Up   | Cyclophilin-like peptidyl-prolyl cis-trans isomerase family protein      |           |
| Pc_TC007477 | -0.34 | 0.93  |      | 0.87  | 0.57      |      | 2.73  | 0.05 | Up   | 1.95  | 0.09  |      | Os03g0706900 protein                                                     |           |
| Pc_TC007481 | 2.19  | 0.02  | Up   | 0     | 0.09      |      | 2.81  | 0.04 | Up   | 0.98  | 0.45  |      | Zinc-binding dehydrogenase family protein                                |           |
| Pc_TC007490 | -3.27 | 0     | Down | -0.81 | 0.38      |      | -3    | 0.03 | Down | -2.46 | 0.01  | Down | photosystem II light harvesting complex gene 2.3                         |           |
| Pc_TC007514 | 2.08  | 0.04  | Up   | 0     | 0.11      |      | 1.5   | 0.33 |      | 0.71  | 0.64  |      | Putative uncharacterized protein                                         |           |
| Pc_TC007528 | 0.51  | 0.11  |      | 0.83  | 0.04      |      | -2.56 | 0    | Down | -0.63 | 0.22  |      | multidrug resistance-associated protein 10                               |           |
| Pc_TC007530 | -0.92 | 0.39  |      | -0.44 | 0.72      |      | -1.27 | 0.39 |      | -3.96 | 0.01  | Down | Putative uncharacterized protein                                         |           |
| Pc_TC007532 | 1.57  | 0     | Up   | 1.7   | 0.01      | Up   | -1.68 | 0.13 |      | 1.82  | 0     | Up   | unknown protein                                                          |           |
| Pc_TC007539 | -0.92 | 0.03  |      | -1.23 | 0.02      | Down | 1.56  | 0.07 |      | 0.6   | 0.27  |      | fructokinase-like 2                                                      |           |
| Pc_TC007544 | 2.25  | 0.01  | Up   | 0     | 0.04      |      | 0.62  | 0.7  |      | -0.15 | 0.97  |      | Expressed protein                                                        |           |
| Pc_TC007545 | 4.08  | 0.02  | Up   | 3.06  | 0.22      |      | 2.96  | 0.28 |      | 2.95  | 0.22  |      | putative,unclassified                                                    |           |
| Pc_TC007548 | -0.56 | 0.47  |      | 2.07  | 0         | Up   | -1.68 | 0.18 |      | -1.73 | 0.06  |      | Expressed protein                                                        |           |
| Pc_TC007554 | 0.74  | 0.12  |      | 1.27  | 0.03      | Up   | -1.14 | 0.27 |      | -0.11 | 0.88  |      | Expressed protein                                                        |           |
| Pc_TC007563 | 1.57  | 0.01  | Up   | 0     | 6.24E-007 |      | 1.32  | 0.22 |      | 0.44  | 0.57  |      | P-loop containing nucleoside triphosphate hydrolases superfamily protein |           |
| Pc_TC007581 | -0.4  | 0.55  |      | -0.25 | 0.75      |      | 2.32  | 0.02 | Up   | 1.13  | 0.11  |      | unknown protein                                                          |           |
| Pc_TC007590 | 0.02  | 1     |      | 0.16  | 0.91      |      | 3.28  | 0    | Up   | 1.88  | 0.02  | Up   | UDP-glucosyl transferase 85A3                                            |           |
| Pc_TC007598 | 1.9   | ##### | Up   | 0     | 2.45E-012 |      | 1.35  | 0.16 |      | -0.37 | 0.58  |      | PDI-like 1-3                                                             |           |
| Pc_TC007599 | 0     | 0.64  |      | -0.94 | 1         |      | 3.83  | 0.03 | Up   | 2.33  | 0.22  |      | Expressed protein                                                        |           |
| Pc_TC007610 | -0.21 | 0.64  |      | -1.19 | 0.04      | Down | 1.12  | 0.22 |      | 0.56  | 0.33  |      | unknown protein                                                          |           |
| Pc_TC007616 | -1.49 | 0.01  | Down | -0.65 | 0.29      |      | -1.81 | 0.08 |      | -2.93 | ##### | Down | protein kinase family protein                                            |           |

|             |       |       |      |       |           |      |       |           |      |       |       |      |                                                                    |       |
|-------------|-------|-------|------|-------|-----------|------|-------|-----------|------|-------|-------|------|--------------------------------------------------------------------|-------|
| Pc_TC007623 | 3.6   | 0.01  | Up   | 0.64  | 0.98      |      | 3.31  | 0.08      |      | 1.8   | 0.42  |      | Protein of unknown function (DUF1637)                              |       |
| Pc_TC007629 | 0.34  | 0.27  |      | 0.52  | 0.19      |      | -1.7  | 0.05      | Down | -1.02 | 0.04  | Down | rhamnose biosynthesis 1                                            |       |
| Pc_TC007639 | -0.91 | 0.03  |      | -1.54 | 0.01      | Down | 1.54  | 0.08      |      | 0.92  | 0.09  |      | Tetratricopeptide repeat (TPR)-like superfamily protein            |       |
| Pc_TC007655 | 0.73  | 0.19  |      | 0.54  | 0.42      |      | 0.51  | 0.62      |      | 1.31  | 0.05  | Up   | Uncharacterized protein                                            |       |
| Pc_TC007657 | -0.31 | 0.5   |      | -1.8  | 0         | Down | 0.28  | 0.77      |      | -0.92 | 0.14  |      | Expressed protein                                                  |       |
| Pc_TC007668 | 0.89  | 0.1   |      | 0.66  | 0.31      |      | 0.23  | 0.83      |      | 1.31  | 0.05  | Up   | cell division cycle 48                                             |       |
| Pc_TC007675 | 0.49  | 0.2   |      | 0.63  | 0.18      |      | -3.68 | 0         | Down | -1.7  | 0     | Down | highly ABA-induced PP2C gene 3                                     |       |
| Pc_TC007681 | 0.35  | 0.42  |      | 0.61  | 0.24      |      | -2.42 | 0.02      | Down | -1.26 | 0.04  | Down | Expressed protein                                                  |       |
| Pc_TC007693 | -0.14 | 0.83  |      | 0.01  | 1         |      | 2.3   | 0.02      | Up   | 1.09  | 0.11  |      | lipid transfer protein 1                                           |       |
| Pc_TC007699 | 0.25  | 0.48  |      | 0.77  | 0.08      |      | -3.27 | 0         | Down | -2.81 | ##### | Down | Phosphate-responsive 1 family protein                              |       |
| Pc_TC007704 | -1.89 | 0.04  | Down | -1.05 | 0.29      |      | 2.87  | 0.01      | Up   | 1.29  | 0.11  |      | wall associated kinase 3                                           |       |
| Pc_TC007710 | -0.63 | 0.05  |      | -1.17 | 0.01      | Down | 1.73  | 0.04      | Up   | 0.82  | 0.1   |      | glycine decarboxylase P-protein 2                                  |       |
| Pc_TC007721 | 0.63  | 0.4   |      | -2.56 | 0.02      | Down | 0.71  | 0.55      |      | -0.25 | 0.8   |      | cytochrome P450, family 71, subfamily B, polypeptide 20            |       |
| Pc_TC007733 | 1.87  | 0.05  | Up   | 0     | 0.05      |      | 1.93  | 0.16      |      | 0.69  | 0.6   |      | Os05g0464300 protein                                               |       |
| Pc_TC007742 | 0.53  | 0.08  |      | 1.12  | 0         | Up   | -4.22 | 9.43E-006 | Down | -2.13 | ##### | Down | oxidative stress 3                                                 |       |
| Pc_TC007757 | 4.89  | ##### | Up   | 0     | 0.67      |      | 4.55  | 0.01      | Up   | 1.63  | 0.49  |      | Expressed protein                                                  |       |
| Pc_TC007762 | -1.03 | 0.12  |      | -1.59 | 0.05      | Down | 0.65  | 0.54      |      | 0.42  | 0.56  |      | Major facilitator superfamily protein                              |       |
| Pc_TC007764 | 0.06  | 0.9   |      | -1.41 | 0.02      | Down | 1.16  | 0.21      |      | 0.95  | 0.1   |      | Armadillo/beta-catenin-like repeat family protein                  |       |
| Pc_TC007767 | 2.63  | 0.01  | Up   | -1.94 | 0.4       |      | 2.41  | 0.09      |      | 1.02  | 0.45  |      | Uncharacterized protein                                            |       |
| Pc_TC007768 | -3.75 | 0     | Down | -2.97 | 0.01      | Down | -2.08 | 0.1       |      | -1.04 | 0.24  |      | Expressed protein                                                  |       |
| Pc_TC007772 | 3.31  | 0     | Up   | 0     | 0.27      |      | 1.94  | 0.25      |      | 0.47  | 0.87  |      | heat shock protein 60-2                                            |       |
| Pc_TC007781 | -1.58 | 0.09  |      | 0.96  | 0.26      |      | 1.89  | 0.09      |      | 1.62  | 0.04  | Up   | Leucine-rich receptor-like protein kinase family protein           |       |
| Pc_TC007786 | -1.13 | 0.01  | Down | -2.08 | 0         | Down | 2.31  | 0.01      | Up   | 1.24  | 0.02  | Up   | Nucleic acid-binding proteins superfamily                          |       |
| Pc_TC007789 | -0.97 | 0.07  |      | -1.5  | 0.02      | Down | 1.67  | 0.08      |      | 0.68  | 0.28  |      | Expressed protein                                                  |       |
| Pc_TC007790 | -0.05 | 0.89  |      | 0.29  | 0.52      |      | -4.55 | 1.01E-005 | Down | -1.27 | 0.02  | Down | Expressed protein                                                  |       |
| Pc_TC007791 | 0.36  | 0.22  |      | 0.18  | 0.62      |      | -0.94 | 0.26      |      | -1.52 | 0     | Down | PLC-like phosphodiesterase family protein                          |       |
| Pc_TC007792 | 0.83  | 0.06  |      | 1.4   | 0.01      | Up   | -1.44 | 0.15      |      | 0.15  | 0.81  |      | nicotianamine synthase 3                                           |       |
| Pc_TC007800 | -0.17 | 0.87  |      | -0.24 | 0.83      |      | 2.39  | 0.03      | Up   | 1.74  | 0.03  | Up   | aldehyde dehydrogenase 3F1                                         |       |
| Pc_TC007822 | -0.02 | 0.97  |      | 0.59  | 0.21      |      | -1.84 | 0.05      |      | -1.65 | 0.01  | Down | Ribosomal protein L34e superfamily protein                         |       |
| Pc_TC007835 | 0.94  | 0.05  |      | 1.42  | 0.01      | Up   | -3.94 | 0         | Down | -1.47 | 0.04  | Down | Expressed protein                                                  |       |
| Pc_TC007837 | -0.28 | 0.7   |      | 0.26  | 0.75      |      | -1.33 | 0.26      |      | -2.11 | 0.02  | Down | NAC domain containing protein 75                                   | NAC   |
| Pc_TC007848 | -3.92 | 0.03  | Down | 0.45  | 0.73      |      | -1.5  | 0.37      |      | -0.37 | 0.8   |      | heat shock protein 90.1                                            |       |
| Pc_TC007863 | -0.63 | 0.35  |      | 0.22  | 0.78      |      | -3.07 | 0.01      | Down | -2.62 | 0     | Down | Expressed protein                                                  |       |
| Pc_TC007880 | 0.91  | 0.07  |      | 0.51  | 0.41      |      | 0.53  | 0.6       |      | 1.27  | 0.04  | Up   | cytosolic invertase 2                                              |       |
| Pc_TC007882 | 0.15  | 0.77  |      | 1.29  | 0.02      | Up   | -8.57 | 1.78E-007 | Down | -4.54 | ##### | Down | late embryogenesis abundant protein, putative                      |       |
| Pc_TC007883 | 2.04  | 0.04  | Up   | 0     | 0.09      |      | 0.86  | 0.61      |      | -0.54 | 0.78  |      | Expressed protein                                                  |       |
| Pc_TC007890 | 2.28  | 0.01  | Up   | 0     | 0.07      |      | 2.33  | 0.09      |      | 1.35  | 0.24  |      | Expressed protein                                                  |       |
| Pc_TC007902 | -0.21 | 0.8   |      | -0.58 | 0.52      |      | 1.63  | 0.14      |      | 1.53  | 0.04  | Up   | GDSL-like Lipase/Acylhydrolase superfamily protein                 |       |
| Pc_TC007903 | 0.51  | 0.15  |      | 0.35  | 0.44      |      | -7.19 | 1.48E-009 | Down | -3.26 | ##### | Down | basic helix-loop-helix (bHLH) DNA-binding superfamily protein      | bHLH  |
| Pc_TC007905 | 1.86  | 0     | Up   | -5.7  | 0         | Down | 1.55  | 0.16      |      | -0.02 | 1     |      | ATP-dependent caseinolytic (Clp) protease/crotonase family protein |       |
| Pc_TC007934 | 2.25  | 0.24  |      | 2.52  | 0.2       |      | 5.19  | 0         | Up   | 3.91  | 0.01  | Up   | ARM repeat superfamily protein                                     |       |
| Pc_TC007939 | 0.65  | 0.14  |      | 0.97  | 0.07      |      | -3.53 | 0         | Down | -1.53 | 0.02  | Down | Expressed protein                                                  |       |
| Pc_TC007942 | 0.37  | 0.38  |      | 0.76  | 0.14      |      | -1.97 | 0.05      | Down | -1.2  | 0.05  |      | Protein of unknown function, DUF547                                |       |
| Pc_TC007955 | 1     | 0.39  |      | 0.98  | 0.45      |      | 3.17  | 0.01      | Up   | 1.76  | 0.11  |      | Alkaline phosphatase 3                                             |       |
| Pc_TC007957 | 1.62  | 0.01  | Up   | 0     | 1.76E-006 |      | 1.72  | 0.11      |      | 0.52  | 0.5   |      | Expressed protein                                                  |       |
| Pc_TC007970 | 0.81  | 0.02  |      | -0.07 | 0.89      |      | -0.56 | 0.53      |      | 1.15  | 0.03  | Up   | Aldolase-type TIM barrel family protein                            |       |
| Pc_TC007974 | 1.09  | 0.06  |      | 1.37  | 0.04      | Up   | -2.17 | 0.07      |      | -0.53 | 0.49  |      | PLATZ transcription factor family protein                          | PLATZ |
| Pc_TC007980 | 0.92  | 0.38  |      | 1.98  | 0.04      | Up   | 1.02  | 0.47      |      | 1.14  | 0.29  |      | cysteine-rich RLK (RECEPTOR-like protein kinase) 5                 |       |
| Pc_TC007982 | -1.08 | 0.02  | Down | -1.45 | 0.01      | Down | 1.63  | 0.07      |      | 0.6   | 0.3   |      | allantoinase                                                       |       |
| Pc_TC008013 | 3.78  | 0.05  | Up   | 4.64  | 0.01      | Up   | 2.31  | 0.48      |      | 3.95  | 0.04  | Up   | NB-ARC domain-containing disease resistance protein                |       |
| Pc_TC008021 | 0.26  | 0.61  |      | -0.55 | 0.4       |      | 2.39  | 0.01      | Up   | 1.84  | 0     | Up   | beta-1,3-glucanase 2                                               |       |
| Pc_TC008025 | 3.08  | 0.18  |      | 3.96  | 0.05      | Up   | 1.09  | 0.94      |      | 0     | 0.9   |      | Expressed protein                                                  |       |
| Pc_TC008027 | 1.76  | 0.04  | Up   | 0.85  | 0.46      |      | 1.4   | 0.29      |      | 0.11  | 0.98  |      | Glutathione S-transferase family protein                           |       |
| Pc_TC008052 | 0.26  | 0.39  |      | 0.38  | 0.33      |      | -1.87 | 0.03      | Down | -0.69 | 0.16  |      | Protein phosphatase 2C family protein                              |       |
| Pc_TC008061 | 0.01  | 1     |      | -0.87 | 0.49      |      | 2.37  | 0.05      | Up   | 1.38  | 0.13  |      | Expressed protein                                                  |       |
| Pc_TC008064 | 0.36  | 0.23  |      | 0.61  | 0.12      |      | -1.45 | 0.09      |      | -1.2  | 0.02  | Down | lipases;hydrolases,acting on ester bonds                           |       |
| Pc_TC008067 | 0.7   | 0.36  |      | 1.17  | 0.16      |      | -3.12 | 0.04      | Down | -1.68 | 0.1   |      | expansin-like A1                                                   |       |
| Pc_TC008070 | 3.33  | 0.03  | Up   | 0     | 0.67      |      | 1.5   | 0.6       |      | 2.43  | 0.19  |      | Expressed protein                                                  |       |
| Pc_TC008075 | -0.92 | 0.83  |      | 0.64  | 0.84      |      | 3.46  | 0.02      | Up   | -0.37 | 0.99  |      | Putative uncharacterized protein                                   |       |
| Pc_TC008088 | -0.13 | 0.93  |      | 0.2   | 0.87      |      | 2.45  | 0.03      | Up   | 1.26  | 0.14  |      | Pathogenesis-related thaumatin superfamily protein                 |       |
| Pc_TC008090 | 0.08  | 0.88  |      | 1.2   | 0.03      | Up   | 0.05  | 0.97      |      | 0.11  | 0.86  |      | UDP-glucosyl transferase 72B3                                      |       |
| Pc_TC008095 | 0.95  | 0.3   |      | 1.25  | 0.21      |      | 3     | 0.01      | Up   | 2.26  | 0.01  | Up   | Expressed protein                                                  |       |



|             |       |       |      |       |           |      |       |           |      |       |       |      |                                                                                           |       |
|-------------|-------|-------|------|-------|-----------|------|-------|-----------|------|-------|-------|------|-------------------------------------------------------------------------------------------|-------|
| Pc_TC008101 | 3     | ##### | Up   | 3.27  | 7.56E-005 | Up   | 1.19  | 0.37      |      | 1.7   | 0.07  |      | Expressed protein                                                                         |       |
| Pc_TC008105 | 0.19  | 0.66  |      | 0.43  | 0.41      |      | -0.89 | 0.35      |      | -1.73 | 0.01  | Down | Protein phosphatase 2C family protein                                                     |       |
| Pc_TC008106 | 0.69  | 0.03  |      | 0.17  | 0.69      |      | -2.22 | 0.01      | Down | 0.56  | 0.27  |      | Peroxidase superfamily protein                                                            |       |
| Pc_TC008107 | 1.82  | 0.01  | Up   | 0     | 0         |      | 1.53  | 0.19      |      | 0.18  | 0.87  |      | DNAJ heat shock family protein                                                            |       |
| Pc_TC008122 | 0     | 0.64  |      | 0     | 0.67      |      | 3.9   | 0.03      | Up   | 0.63  | 0.96  |      | Bifunctional inhibitor/lipid-transfer protein/seed storage 2S albumin superfamily protein |       |
| Pc_TC008126 | -1.28 | 0.02  | Down | -0.88 | 0.18      |      | 1.53  | 0.11      |      | 0.35  | 0.59  |      | Os01g0278900 protein                                                                      |       |
| Pc_TC008132 | 1.77  | 0     | Up   | 1.46  | 0.02      | Up   | -0.84 | 0.44      |      | 1.46  | 0.03  | Up   | bifunctional nuclease i                                                                   |       |
| Pc_TC008135 | 1.82  | 0     | Up   | 0     | 2.13E-007 |      | 1.82  | 0.08      |      | 0.66  | 0.36  |      | enoyl-CoA hydratase 2                                                                     |       |
| Pc_TC008145 | -0.39 | 0.65  |      | 0.09  | 0.95      |      | -4.92 | 0         | Down | -2.8  | 0.01  | Down | Expressed protein                                                                         |       |
| Pc_TC008151 | 0.53  | 0.42  |      | 2.07  | 0         | Up   | -1.9  | 0.12      |      | -1.23 | 0.15  |      | Os06g0127800 protein                                                                      |       |
| Pc_TC008152 | -1.24 | 0.67  |      | 0.06  | 1         |      | 3.23  | 0.03      | Up   | 2.35  | 0.06  |      | Uncharacterized protein                                                                   |       |
| Pc_TC008154 | 0.83  | 0.37  |      | 1.88  | 0.04      | Up   | 0.61  | 0.67      |      | 1.44  | 0.13  |      | Protein kinase superfamily protein                                                        |       |
| Pc_TC008168 | 1.33  | 0.11  |      | 1.82  | 0.04      | Up   | -0.3  | 0.86      |      | 1.04  | 0.28  |      | Uncharacterized protein                                                                   |       |
| Pc_TC008169 | -2.02 | 0.01  | Down | -3.21 | 0         | Down | 1.05  | 0.33      |      | -0.69 | 0.4   |      | Protein of unknown function (DUF581)                                                      |       |
| Pc_TC008170 | 0.45  | 0.51  |      | 1.38  | 0.06      |      | -0.76 | 0.52      |      | -2.4  | 0.01  | Down | EXPRESSED IN: shoot apex,embryo,flower,seed                                               |       |
| Pc_TC008176 | 0.05  | 0.96  |      | -0.19 | 0.82      |      | 1.38  | 0.19      |      | 1.61  | 0.02  | Up   | plant U-box 29                                                                            |       |
| Pc_TC008179 | 1.25  | 0.17  |      | 0.52  | 0.68      |      | 2.65  | 0.03      | Up   | 2.07  | 0.03  | Up   | unknown protein                                                                           |       |
| Pc_TC008184 | 2.2   | 0     | Up   | 0     | 0         |      | 1.56  | 0.2       |      | -0.22 | 0.86  |      | Expressed protein                                                                         |       |
| Pc_TC008192 | -3.92 | 0.03  | Down | -1.36 | 0.36      |      | 0.03  | 1         |      | -0.79 | 0.55  |      | Expressed protein                                                                         |       |
| Pc_TC008199 | -0.69 | 0.11  |      | -0.65 | 0.22      |      | 2.49  | 0.01      | Up   | 1.37  | 0.01  | Up   | Myosin heavy chain-related protein                                                        |       |
| Pc_TC008215 | 0.15  | 0.82  |      | 1.28  | 0.06      |      | -2.32 | 0.06      |      | -2.09 | 0.01  | Down | Expressed protein                                                                         |       |
| Pc_TC008216 | -0.37 | 0.37  |      | -0.84 | 0.11      |      | 1.96  | 0.03      | Up   | 1.03  | 0.06  |      | Flavin containing amine oxidoreductase family                                             |       |
| Pc_TC008222 | 3.08  | 0.05  | Up   | 0     | 0.67      |      | 3.09  | 0.11      |      | 2.87  | 0.09  |      | Expressed protein                                                                         |       |
| Pc_TC008226 | 2.28  | 0     | Up   | 0     | 0         |      | 2.44  | 0.03      | Up   | 1.04  | 0.21  |      | Galactose mutarotase-like superfamily protein                                             |       |
| Pc_TC008229 | 2.3   | 0     | Up   | 0     | 0.01      |      | 1.96  | 0.12      |      | -0.54 | 0.67  |      | Expressed protein                                                                         |       |
| Pc_TC008249 | 2.02  | 0     | Up   | 0     | 0         |      | 2     | 0.08      |      | 0.02  | 1     |      | synaptobrevin-related protein 1                                                           |       |
| Pc_TC008274 | 0.87  | 0.01  |      | 0.15  | 0.73      |      | 0.04  | 0.97      |      | 1.97  | 0     | Up   | D-3-phosphoglycerate dehydrogenase                                                        |       |
| Pc_TC008278 | -0.77 | 0.28  |      | -1.92 | 0.03      | Down | -0.89 | 0.44      |      | -0.57 | 0.48  |      | hAT dimerisation domain-containing protein                                                |       |
| Pc_TC008280 | -0.55 | 0.5   |      | -2.07 | 0.05      | Down | 2.07  | 0.06      |      | 1.51  | 0.05  |      | hercules receptor kinase 1                                                                |       |
| Pc_TC008286 | 0.2   | 0.94  |      | -0.23 | 0.95      |      | 2.95  | 0.02      | Up   | 2.36  | 0.02  | Up   | wall associated kinase 3                                                                  |       |
| Pc_TC008289 | -0.73 | 0.15  |      | -1.11 | 0.08      |      | 2.29  | 0.01      | Up   | 0.83  | 0.17  |      | DNA glycosylase superfamily protein                                                       |       |
| Pc_TC008305 | -0.4  | 0.36  |      | -1.38 | 0.02      | Down | 1.94  | 0.03      | Up   | 1.03  | 0.07  |      | FK506-binding protein 16-2                                                                |       |
| Pc_TC008309 | -0.36 | 0.34  |      | -0.79 | 0.11      |      | 1.85  | 0.03      | Up   | 0.7   | 0.19  |      | Glyoxalase/Bleomycin resistance protein/Dioxygenase superfamily protein                   |       |
| Pc_TC008310 | -0.55 | 0.55  |      | 0.02  | 1         |      | -2.58 | 0.08      |      | -4.46 | 0     | Down | Expressed protein                                                                         |       |
| Pc_TC008341 | 0.76  | 0.38  |      | 2.04  | 0.02      | Up   | -1.02 | 0.49      |      | -0.73 | 0.53  |      | Expressed protein                                                                         |       |
| Pc_TC008349 | -0.16 | 0.83  |      | 0.49  | 0.51      |      | -2.75 | 0.03      | Down | -2.55 | 0     | Down | Expressed protein                                                                         |       |
| Pc_TC008356 | 1.43  | 0.2   |      | 2.64  | 0.01      | Up   | 0     | 0.07      |      | -1.54 | 0.39  |      | Expressed protein                                                                         |       |
| Pc_TC008359 | -0.32 | 0.76  |      | 1.74  | 0.04      | Up   | -1.55 | 0.28      |      | -0.19 | 0.88  |      | Expressed protein                                                                         |       |
| Pc_TC008373 | 3.03  | 0.01  | Up   | 0     | 0.36      |      | 2.2   | 0.2       |      | 1.43  | 0.39  |      | Class II aminoacyl-tRNA and biotin synthetases superfamily protein                        |       |
| Pc_TC008383 | 3.63  | 0     | Up   | 0     | 0.36      |      | 3.12  | 0.05      | Up   | 0.21  | 1     |      | zinc finger (C2H2 type) family protein                                                    | C2H2  |
| Pc_TC008400 | -0.1  | 0.89  |      | 0.53  | 0.46      |      | -2.47 | 0.04      | Down | -1.8  | 0.03  | Down | putative glucan 1,3-beta-glucosidase'                                                     |       |
| Pc_TC008401 | -0.48 | 0.42  |      | 0.32  | 0.63      |      | 2.21  | 0.03      | Up   | 1.31  | 0.05  | Up   | Putative uncharacterized protein OJ1008 F08.9                                             |       |
| Pc_TC008403 | 0.71  | 0.02  |      | 0.51  | 0.17      |      | -1.89 | 0.03      | Down | 0.13  | 0.8   |      | Sulfite exporter TauE/SafE family protein                                                 |       |
| Pc_TC008412 | 2.83  | 0.02  | Up   | 0     | 0.36      |      | 2.03  | 0.25      |      | 0.63  | 0.82  |      | Expressed protein                                                                         |       |
| Pc_TC008416 | 2.35  | 0.03  | Up   | 0     | 0.2       |      | 1.44  | 0.4       |      | 0.04  | 1     |      | OSJNBa0006A01.18 protein                                                                  |       |
| Pc_TC008426 | -0.43 | 0.53  |      | 2.19  | 0         | Up   | 0     | 1.34E-005 |      | -4.88 | ##### | Down | cinnamyl alcohol dehydrogenase 6                                                          |       |
| Pc_TC008437 | 0.38  | 0.28  |      | 0.55  | 0.21      |      | 0     | 1         |      | 1.02  | 0.05  | Up   | ATPase E1-E2 type family protein / haloacid dehalogenase-like hydrolase family protein    |       |
| Pc_TC008438 | -0.28 | 0.73  |      | -0.68 | 0.45      |      | -0.35 | 0.78      |      | -2.07 | 0.03  | Down | Expressed protein                                                                         |       |
| Pc_TC008454 | 0.43  | 0.45  |      | 0.83  | 0.2       |      | -2.87 | 0.01      | Down | -1.15 | 0.12  |      | Expressed protein                                                                         |       |
| Pc_TC008461 | -1.41 | 0.18  |      | -1.94 | 0.11      |      | -4.3  | 0.02      | Down | -3.18 | 0.01  | Down | Ribosomal protein S3Ae                                                                    |       |
| Pc_TC008465 | 0.59  | 0.45  |      | 1.1   | 0.2       |      | 0     | 0         |      | -2.5  | 0.03  | Down | A20/AN1-like zinc finger family protein                                                   |       |
| Pc_TC008490 | 0.53  | 0.37  |      | -0.17 | 0.83      |      | -1.31 | 0.24      |      | -1.97 | 0.01  | Down | DEAD box RNA helicase 1                                                                   |       |
| Pc_TC008495 | 0     | 1     |      | 0.11  | 0.92      |      | -2.77 | 0.04      | Down | -0.35 | 0.69  |      | Expressed protein                                                                         |       |
| Pc_TC008503 | 0.31  | 0.59  |      | 1.08  | 0.1       |      | -5.57 | 9.42E-005 | Down | -2.87 | 0     | Down | Expressed protein                                                                         |       |
| Pc_TC008517 | -1.83 | 0.02  | Down | -0.21 | 0.81      |      | 1.49  | 0.17      |      | 0.59  | 0.45  |      | Protein-tyrosine phosphatase-like,PTPLA                                                   |       |
| Pc_TC008546 | -0.32 | 0.34  |      | -1.07 | 0.02      | Down | 1.37  | 0.1       |      | 0.82  | 0.11  |      | ARM repeat superfamily protein                                                            |       |
| Pc_TC008551 | 3.33  | 0.03  | Up   | 2.38  | 0.24      |      | 1.09  | 0.77      |      | 2.8   | 0.1   |      | Expressed protein                                                                         |       |
| Pc_TC008552 | -3.45 | 0     | Down | 0     | 6.30E-005 |      | -2.44 | 0.07      |      | -2.58 | 0.01  | Down | Peroxidase superfamily protein                                                            |       |
| Pc_TC008572 | -0.03 | 0.98  |      | 0.19  | 0.81      |      | -2.31 | 0.06      |      | -4.13 | ##### | Down | RNA-directed DNA polymerase (reverse transcriptase)-related family protein                |       |
| Pc_TC008579 | 1.97  | 0.02  | Up   | 0     | 0.02      |      | 1.16  | 0.41      |      | 0.14  | 0.96  |      | histone H2A protein 9                                                                     | CCAAT |
| Pc_TC008580 | -1.76 | 0.12  |      | -0.26 | 0.84      |      | 2.77  | 0.02      | Up   | 1.17  | 0.2   |      | Expressed protein                                                                         |       |
| Pc_TC008586 | 2.54  | 0     | Up   | 0     | 0.07      |      | 1.31  | 0.38      |      | 0.63  | 0.66  |      | isocitrate dehydrogenase                                                                  |       |

|             |       |       |      |       |           |      |       |      |      |       |      |      |                                                                    |      |
|-------------|-------|-------|------|-------|-----------|------|-------|------|------|-------|------|------|--------------------------------------------------------------------|------|
| Pc_TC008617 | -1.97 | 0     | Down | -1.42 | 0.04      | Down | 0.5   | 0.61 |      | -1.9  | 0.01 | Down | beta-amylase 5                                                     |      |
| Pc_TC008622 | 0.62  | 0.13  |      | -0.01 | 0.99      |      | 0.13  | 0.89 |      | 1.28  | 0.02 | Up   | cytochrome P450, family 72, subfamily A, polypeptide 14            |      |
| Pc_TC008641 | 2.13  | 0.01  | Up   | 0     | 0.02      |      | 0.98  | 0.49 |      | -0.37 | 0.81 |      | Expressed protein                                                  |      |
| Pc_TC008649 | -0.34 | 0.93  |      | 2.45  | 0.03      | Up   | 0     | 0.08 |      | -0.57 | 0.79 |      | Expressed protein                                                  |      |
| Pc_TC008666 | -0.42 | 0.48  |      | -0.27 | 0.71      |      | 1.47  | 0.14 |      | 1.72  | 0.01 | Up   | lipid-transfer protein/seed storage 2S albumin superfamily protein |      |
| Pc_TC008678 | -0.45 | 0.48  |      | 1.06  | 0.11      |      | -1.97 | 0.08 |      | -1.57 | 0.04 | Down | Expressed protein                                                  |      |
| Pc_TC008680 | 0.64  | 0.35  |      | 0.78  | 0.32      |      | -2.79 | 0.04 | Down | -0.15 | 0.88 |      | unknown protein                                                    |      |
| Pc_TC008684 | -0.32 | 0.76  |      | 0.06  | 0.99      |      | -3.35 | 0.04 | Down | -2.06 | 0.07 |      | Expressed protein                                                  |      |
| Pc_TC008689 | 0.43  | 0.14  |      | 0.67  | 0.08      |      | -2.31 | 0.01 | Down | -1.17 | 0.02 | Down | unknown protein                                                    |      |
| Pc_TC008696 | 2.4   | 0.01  | Up   | 0     | 0.11      |      | 2.5   | 0.07 |      | 1.08  | 0.41 |      | Expressed protein                                                  |      |
| Pc_TC008704 | -1.21 | 0.29  |      | -0.4  | 0.76      |      | -1.37 | 0.36 |      | -3.83 | 0.01 | Down | Os01g0516200 protein                                               |      |
| Pc_TC008706 | -0.47 | 0.68  |      | -1.08 | 0.39      |      | -1.96 | 0.21 |      | -2.83 | 0.04 | Down | Putative RNA-directed DNA polymerase (Reverse transcriptase)       |      |
| Pc_TC008741 | -0.55 | 0.55  |      | 1.64  | 0.04      | Up   | -2.41 | 0.1  |      | -4.46 | 0    | Down | phosphate deficiency response 2                                    |      |
| Pc_TC008754 | 2.74  | 0.01  | Up   | 0     | 0.2       |      | 2.34  | 0.12 |      | 1.13  | 0.45 |      | Putative uncharacterized protein Sb07g020255 (Fragment)            |      |
| Pc_TC008759 | 0.77  | 0.03  |      | 1.54  | 0         | Up   | -2.87 | 0    | Down | -0.23 | 0.68 |      | uclacyanin 1                                                       |      |
| Pc_TC008760 | 2.88  | ##### | Up   | 0     | 4.05E-005 |      | 1.66  | 0.14 |      | 0.12  | 0.91 |      | Expressed protein                                                  |      |
| Pc_TC008772 | -0.74 | 0.37  |      | -2.01 | 0.05      |      | -4.02 | 0.01 | Down | -0.99 | 0.29 |      | Expressed protein                                                  |      |
| Pc_TC008777 | -2.48 | 0.01  | Down | -0.8  | 0.4       |      | 1.01  | 0.37 |      | -0.12 | 0.91 |      | Os06g0152550 protein                                               |      |
| Pc_TC008785 | 1.39  | 0.05  | Up   | 1.51  | 0.06      |      | -4.74 | 0.01 | Down | -0.67 | 0.49 |      | Expressed protein                                                  |      |
| Pc_TC008786 | 1.79  | 0.02  | Up   | 0     | 0         |      | 1.07  | 0.41 |      | 0.21  | 0.87 |      | Expressed protein                                                  |      |
| Pc_TC008789 | 0.08  | 0.99  |      | -0.02 | 1         |      | -3.82 | 0.04 | Down | -2.7  | 0.05 |      | Expressed protein                                                  |      |
| Pc_TC008798 | 0.32  | 0.34  |      | 0.55  | 0.2       |      | -1.95 | 0.03 | Down | -1.24 | 0.02 | Down | TSL-kinase interacting protein 1                                   |      |
| Pc_TC008801 | 2.06  | 0.01  | Up   | 0     | 0.01      |      | 0.89  | 0.5  |      | -0.18 | 0.91 |      | Expressed protein                                                  |      |
| Pc_TC008805 | -2.38 | 0     | Down | -1.15 | 0.13      |      | -0.4  | 0.71 |      | 0.06  | 0.94 |      | Expressed protein                                                  |      |
| Pc_TC008811 | 2.66  | 0.03  | Up   | 0.64  | 0.84      |      | 1.5   | 0.45 |      | -0.05 | 1    |      | Expressed protein                                                  |      |
| Pc_TC008818 | -0.51 | 0.76  |      | 2.06  | 0.04      | Up   | -3.08 | 0.14 |      | -1.15 | 0.45 |      | Expressed protein                                                  |      |
| Pc_TC008825 | -3.48 | ##### | Down | -4.5  | 6.44E-007 | Down | -2.38 | 0.03 | Down | -2.72 | 0    | Down | actin 3                                                            |      |
| Pc_TC008834 | -3.09 | 0.04  | Down | 0     | 0.01      |      | -0.42 | 0.8  |      | 0     | 0    |      | Expressed protein                                                  |      |
| Pc_TC008837 | 1.95  | 0.1   |      | 2.64  | 0.03      | Up   | 1.5   | 0.37 |      | 1.13  | 0.45 |      | Expressed protein                                                  |      |
| Pc_TC008848 | 0.08  | 0.96  |      | 1.27  | 0.13      |      | -3.3  | 0.03 | Down | -0.8  | 0.42 |      | Carboxylesterase CarE-12                                           |      |
| Pc_TC008849 | 3.05  | 0     | Up   | 0     | 0.2       |      | 0.62  | 0.79 |      | -1.37 | 0.55 |      | Expressed protein                                                  |      |
| Pc_TC008863 | 3.47  | 0     | Up   | 0     | 0.36      |      | 1.67  | 0.38 |      | 0.21  | 1    |      | Expressed protein                                                  |      |
| Pc_TC008864 | 0.66  | 0.62  |      | 2.2   | 0.04      | Up   | 1.09  | 0.48 |      | 0.55  | 0.71 |      | Expressed protein                                                  |      |
| Pc_TC008866 | -0.57 | 0.38  |      | 0.31  | 0.66      |      | -1.59 | 0.16 |      | -1.58 | 0.05 | Down | Expressed protein                                                  |      |
| Pc_TC008870 | 0.24  | 0.43  |      | 0.01  | 0.98      |      | -1.61 | 0.06 |      | -1.21 | 0.02 | Down | calmodulin 1                                                       |      |
| Pc_TC008872 | 1.22  | 0.05  | Up   | 0.58  | 0.44      |      | 0.07  | 0.96 |      | 1.08  | 0.14 |      | Protein kinase superfamily protein                                 |      |
| Pc_TC008874 | -0.11 | 0.9   |      | 1.34  | 0.07      |      | -3.54 | 0.01 | Down | -1.51 | 0.09 |      | Expressed protein                                                  |      |
| Pc_TC008876 | 3.17  | 0.04  | Up   | 2.23  | 0.29      |      | 1.09  | 0.77 |      | 2.43  | 0.19 |      | Uncharacterized protein                                            |      |
| Pc_TC008881 | 3.78  | 0     | Up   | 0     | 0.36      |      | 2.31  | 0.18 |      | 0.8   | 0.73 |      | SNARE-like superfamily protein                                     |      |
| Pc_TC008886 | 0     | 1     |      | 0.06  | 0.96      |      | 0.77  | 0.48 |      | 1.52  | 0.03 | Up   | Putative polyprotein                                               |      |
| Pc_TC008893 | -0.3  | 0.88  |      | -1.32 | 0.42      |      | -3.2  | 0.12 |      | -4.08 | 0.04 | Down | Uncharacterized protein                                            |      |
| Pc_TC008894 | 0.58  | 0.1   |      | 0.57  | 0.21      |      | -2.2  | 0.02 | Down | -1.07 | 0.05 |      | Expressed protein                                                  |      |
| Pc_TC008899 | 0.38  | 0.46  |      | -1.77 | 0.01      | Down | 0.54  | 0.59 |      | -0.22 | 0.74 |      | O-acetylserine (thiol) lyase (OAS-TL) isoform A1                   |      |
| Pc_TC008947 | 2.91  | 0     | Up   | 0     | 0.07      |      | 2.2   | 0.11 |      | 1.55  | 0.17 |      | Expressed protein                                                  |      |
| Pc_TC008950 | -3.57 | 0.01  | Down | -0.89 | 0.46      |      | 0.56  | 0.68 |      | -0.37 | 0.75 |      | Expressed protein                                                  |      |
| Pc_TC008953 | 0.45  | 0.18  |      | 0.32  | 0.47      |      | -3.03 | 0    | Down | -1.11 | 0.04 | Down | Expressed protein                                                  |      |
| Pc_TC008959 | 3.02  | 0.02  | Up   | 0     | 0.48      |      | 2.09  | 0.29 |      | 1.74  | 0.33 |      | Expressed protein                                                  |      |
| Pc_TC008960 | 1.76  | 0.03  | Up   | 0     | 0.01      |      | 1.54  | 0.22 |      | 0.24  | 0.86 |      | Expressed protein                                                  |      |
| Pc_TC008961 | 0.44  | 0.16  |      | 1.19  | 0         | Up   | -1.6  | 0.06 |      | -0.47 | 0.36 |      | lipoxigenase 3                                                     |      |
| Pc_TC008968 | 0     | 0.04  |      | 0     | 0.05      |      | 4.47  | 0    | Up   | 0     | 0.02 |      | ADP-ribosylation factor-like protein                               |      |
| Pc_TC008975 | 0.59  | 0.45  |      | 1.13  | 0.17      |      | -4.74 | 0.01 | Down | -1.3  | 0.19 |      | Expressed protein                                                  | Tify |
| Pc_TC008978 | -0.42 | 0.67  |      | 0.89  | 0.33      |      | -3.45 | 0.03 | Down | -1.08 | 0.3  |      | Expressed protein                                                  |      |
| Pc_TC008982 | 3.08  | 0.05  | Up   | 0     | 0.67      |      | 3.67  | 0.04 | Up   | 1.63  | 0.49 |      | homogentisate 1,2-dioxygenase                                      |      |
| Pc_TC009000 | -0.45 | 0.51  |      | -0.36 | 0.66      |      | -2.96 | 0.02 | Down | -2.44 | 0.01 | Down | Expressed protein                                                  |      |
| Pc_TC009002 | 0.43  | 0.15  |      | 0.67  | 0.08      |      | -1.87 | 0.03 | Down | -1.16 | 0.02 | Down | Endosomal targeting BRO1-like domain-containing protein            |      |
| Pc_TC009011 | -1.99 | 0.04  | Down | -1.43 | 0.16      |      | -0.25 | 0.86 |      | -0.45 | 0.64 |      | Expressed protein                                                  |      |
| Pc_TC009013 | 1.49  | 0.01  | Up   | 0     | 3.60E-008 |      | 1.09  | 0.3  |      | -0.53 | 0.49 |      | Ribosomal protein S10p/S20e family protein                         |      |
| Pc_TC009014 | -0.19 | 0.67  |      | 0.08  | 0.88      |      | -2.06 | 0.04 | Down | -2.04 | 0    | Down | myb domain protein 12                                              |      |
| Pc_TC009016 | 3.99  | 0     | Up   | 0     | 0.67      |      | 2.31  | 0.3  |      | -0.37 | 1    |      | glycyl-tRNA synthetase / glycine--tRNA ligase                      |      |
| Pc_TC009024 | 0.33  | 0.55  |      | 0.36  | 0.58      |      | -0.75 | 0.48 |      | -1.5  | 0.04 | Down | Expressed protein                                                  |      |
| Pc_TC009028 | 0.08  | 1     |      | -0.13 | 1         |      | 3.39  | 0.01 | Up   | 1.75  | 0.13 |      | UDP-glucosyl transferase 78D2                                      |      |
| Pc_TC009032 | 0.11  | 0.76  |      | 0.32  | 0.49      |      | -1.19 | 0.19 |      | -1.14 | 0.04 | Down | ERD (early-responsive to dehydration stress) family protein        |      |

|             |       |       |      |       |           |      |       |           |      |       |       |      |                                                                           |           |
|-------------|-------|-------|------|-------|-----------|------|-------|-----------|------|-------|-------|------|---------------------------------------------------------------------------|-----------|
| Pc_TC009036 | -3.48 | 0     | Down | -2.69 | 0.02      | Down | -3.24 | 0.02      | Down | -5.93 | ##### | Down | light-harvesting chlorophyll B-binding protein 3                          |           |
| Pc_TC009047 | 0.08  | 1     |      | 1.06  | 0.62      |      | 2.67  | 0.1       |      | 2.87  | 0.02  | Up   | Expressed protein                                                         |           |
| Pc_TC009049 | 2.03  | 0     | Up   | 0     | 0         |      | 1.51  | 0.19      |      | -0.2  | 0.85  |      | Os01g0833600 protein                                                      |           |
| Pc_TC009062 | 2.73  | 0     | Up   | 0     | 0.07      |      | 3.36  | 0.01      | Up   | -1.11 | 0.51  |      | Uncharacterized protein                                                   |           |
| Pc_TC009068 | 5.1   | ##### | Up   | 0     | 0.67      |      | 3.79  | 0.03      | Up   | 0.63  | 0.96  |      | Expressed protein                                                         |           |
| Pc_TC009075 | -0.3  | 0.88  |      | -3.64 | 0.09      |      | 2.56  | 0.05      | Up   | 1.63  | 0.11  |      | Expressed protein                                                         |           |
| Pc_TC009083 | 0.86  | 0.03  |      | 1.1   | 0.03      | Up   | -2.08 | 0.04      | Down | 0.63  | 0.27  |      | Cupredoxin superfamily protein                                            |           |
| Pc_TC009089 | 0.86  | 0.36  |      | 0.93  | 0.38      |      | -1.34 | 0.4       |      | -3.54 | 0.03  | Down | Uncharacterized protein                                                   |           |
| Pc_TC009093 | -2.4  | 0.02  | Down | -0.7  | 0.48      |      | 0.92  | 0.44      |      | 0.59  | 0.5   |      | unknown protein                                                           |           |
| Pc_TC009098 | -0.6  | 0.66  |      | 1.64  | 0.1       |      | -3.5  | 0.08      |      | -3.37 | 0.04  | Down | phosphate deficiency response 2                                           |           |
| Pc_TC009102 | 0.39  | 0.28  |      | 0.01  | 0.98      |      | 1.99  | 0.02      | Up   | 2.12  | ##### | Up   | Chlorophyll A-B binding family protein                                    |           |
| Pc_TC009103 | 0.96  | 0.09  |      | 0.69  | 0.31      |      | -5.03 | 0         | Down | -4.06 | ##### | Down | Expressed protein                                                         |           |
| Pc_TC009110 | -3.24 | 0.03  | Down | 0     | 0.01      |      | 1.41  | 0.27      |      | 0.16  | 0.92  |      | Expressed protein                                                         |           |
| Pc_TC009112 | 1.97  | 0.01  | Up   | 0     | 0         |      | 1.98  | 0.09      |      | 0.43  | 0.66  |      | Uncharacterized protein                                                   |           |
| Pc_TC009123 | -0.29 | 0.75  |      | 1.23  | 0.13      |      | 0     | 0         |      | -3.11 | 0.01  | Down | Expressed protein                                                         |           |
| Pc_TC009136 | -1.57 | 0.01  | Down | -2.89 | 9.11E-005 | Down | 0.83  | 0.4       |      | 0.5   | 0.43  |      | senescence-related gene 1                                                 |           |
| Pc_TC009145 | 0.18  | 0.61  |      | 0.33  | 0.45      |      | -1.81 | 0.04      | Down | -1.4  | 0.01  | Down | ARM repeat superfamily protein                                            |           |
| Pc_TC009156 | -0.92 | 0.34  |      | 1.25  | 0.15      |      | -3.5  | 0.03      | Down | -0.79 | 0.44  |      | Uncharacterized protein                                                   |           |
| Pc_TC009158 | -0.92 | 0.41  |      | -0.7  | 0.58      |      | 3.15  | 0.01      | Up   | 1.59  | 0.08  |      | Protein kinase superfamily protein                                        |           |
| Pc_TC009163 | 0.59  | 0.34  |      | 1.39  | 0.04      | Up   | -0.06 | 0.97      |      | 0.18  | 0.82  |      | glutamate receptor 2.9                                                    |           |
| Pc_TC009170 | 1.89  | 0     | Up   | 0     | 8.90E-006 |      | 2.01  | 0.06      |      | 0     | 1     |      | Expressed protein                                                         |           |
| Pc_TC009171 | 0.1   | 0.85  |      | 0.9   | 0.13      |      | -3.42 | 0         | Down | -2.22 | 0     | Down | Late embryogenesis abundant (LEA) hydroxyproline-rich glycoprotein family |           |
| Pc_TC009179 | -0.46 | 0.65  |      | 0.84  | 0.36      |      | -4.35 | 0.01      | Down | 0     | 0     |      | Uncharacterized protein                                                   |           |
| Pc_TC009205 | -0.48 | 0.11  |      | -1.68 | 7.21E-006 | Down | 1.58  | 0.09      |      | 0.97  | 0.06  |      | rubisco activase                                                          |           |
| Pc_TC009206 | 1.98  | 0.01  | Up   | 0     | 0         |      | 2.02  | 0.09      |      | 0.86  | 0.36  |      | NADH dehydrogenase subunit 7                                              |           |
| Pc_TC009216 | -0.28 | 0.61  |      | -0.87 | 0.2       |      | 1.89  | 0.05      |      | 1.83  | 0     | Up   | expansin B4                                                               |           |
| Pc_TC009221 | 1.44  | 0     | Up   | 1.88  | 0         | Up   | 1.43  | 0.14      |      | 0.54  | 0.41  |      | DNA-binding protein phosphatase 1                                         | DBP       |
| Pc_TC009227 | -0.11 | 1     |      | 0.06  | 1         |      | 3.37  | 0.01      | Up   | 2.02  | 0.07  |      | Expressed protein                                                         |           |
| Pc_TC009230 | 0.59  | 0.5   |      | 0.61  | 0.55      |      | 0     | 0         |      | -3.08 | 0.02  | Down | Expressed protein                                                         |           |
| Pc_TC009236 | 0.47  | 0.2   |      | 1.06  | 0.02      | Up   | -4.98 | 4.33E-006 | Down | -3.21 | ##### | Down | Integrase-type DNA-binding superfamily protein                            | AP2-EREBP |
| Pc_TC009237 | 1.15  | 0.05  | Up   | 0     | 1.92E-007 |      | 0.61  | 0.57      |      | -0.24 | 0.76  |      | Major facilitator superfamily protein                                     |           |
| Pc_TC009239 | 1.25  | 0.02  | Up   | 2.19  | 0         | Up   | -2.31 | 0.05      |      | -0.77 | 0.32  |      | Expressed protein                                                         |           |
| Pc_TC009244 | 0.42  | 0.27  |      | 0.93  | 0.05      |      | -2.39 | 0.01      | Down | -0.86 | 0.13  |      | ABI five binding protein 3                                                |           |
| Pc_TC009248 | 1.22  | 0.02  | Up   | 1.98  | 0         | Up   | -2.39 | 0.04      | Down | 0.24  | 0.74  |      | fucosyltransferase 1                                                      |           |
| Pc_TC009252 | 0.18  | 0.84  |      | 1.64  | 0.03      | Up   | 0     | 0         |      | 0     | ##### |      | Expressed protein                                                         |           |
| Pc_TC009259 | -0.6  | 0.16  |      | -1.09 | 0.05      | Down | 0.55  | 0.54      |      | 0.07  | 0.9   |      | Tetratricopeptide repeat (TPR)-like superfamily protein                   |           |
| Pc_TC009268 | 1.89  | 0.38  |      | 3.06  | 0.08      |      | 3.2   | 0.09      |      | 3.33  | 0.03  | Up   | Expressed protein                                                         |           |
| Pc_TC009270 | -0.37 | 0.44  |      | -0.79 | 0.19      |      | 2.11  | 0.02      | Up   | 0.89  | 0.13  |      | Expressed protein                                                         |           |
| Pc_TC009279 | 0     | 0.05  |      | 1.32  | 0.28      |      | 2.75  | 0.04      | Up   | 2.11  | 0.04  | Up   | xyloglucan endotransglucosylase/hydrolase 9                               |           |
| Pc_TC009290 | 0.76  | 0.11  |      | 1.24  | 0.03      | Up   | -0.53 | 0.6       |      | 0.82  | 0.18  |      | glycosyl hydrolase 9B8                                                    |           |
| Pc_TC009294 | 2.06  | 0.01  | Up   | 0.06  | 1         |      | 0.46  | 0.77      |      | 0.93  | 0.37  |      | laccase 7                                                                 |           |
| Pc_TC009309 | -0.43 | 0.64  |      | 0.37  | 0.7       |      | -2.9  | 0.05      | Down | -3.58 | 0     | Down | unknown protein                                                           |           |
| Pc_TC009320 | -1.19 | 0.01  | Down | -1.98 | 0         | Down | 1.84  | 0.04      | Up   | 0.9   | 0.11  |      | Prefoldin chaperone subunit family protein                                |           |
| Pc_TC009325 | 0.98  | 0.01  |      | 1.56  | 0         | Up   | -2.28 | 0.02      | Down | 1.58  | 0     | Up   | Pyridoxal phosphate (PLP)-dependent transferases superfamily protein      |           |
| Pc_TC009340 | 0.53  | 0.1   |      | 0.99  | 0.02      |      | -2.39 | 0.01      | Down | -1.33 | 0.01  | Down | Copper transport protein family                                           |           |
| Pc_TC009347 | 0.44  | 0.62  |      | -2.75 | 0.04      | Down | 1.34  | 0.27      |      | 1.05  | 0.24  |      | Expressed protein                                                         |           |
| Pc_TC009374 | 3.21  | 0     | Up   | 0     | 0.36      |      | 3.12  | 0.05      | Up   | 0.43  | 0.93  |      | Expressed protein                                                         |           |
| Pc_TC009387 | -0.64 | 0.11  |      | -1.15 | 0.03      | Down | 1.14  | 0.19      |      | 0.42  | 0.44  |      | methionine aminopeptidase 1B                                              |           |
| Pc_TC009396 | -3.8  | ##### | Down | 0.07  | 0.94      |      | -2.31 | 0.06      |      | -1.93 | 0.02  | Down | Uncharacterized protein                                                   |           |
| Pc_TC009398 | -0.57 | 0.33  |      | -1.24 | 0.08      |      | 2.18  | 0.03      | Up   | 0.95  | 0.14  |      | unknown protein                                                           |           |
| Pc_TC009399 | 0.78  | 0.12  |      | 0.49  | 0.43      |      | -2.98 | 0.01      | Down | -0.84 | 0.23  |      | Expressed protein                                                         |           |
| Pc_TC009403 | 2.89  | 0.03  | Up   | 0     | 0.48      |      | 2.38  | 0.2       |      | -0.37 | 1     |      | Uncharacterized protein                                                   |           |
| Pc_TC009404 | -0.97 | 0.16  |      | -0.84 | 0.29      |      | -1.21 | 0.29      |      | -2.55 | 0     | Down | Putative uncharacterized protein (Fragment)                               |           |
| Pc_TC009408 | 0.29  | 0.81  |      | 2     | 0.03      | Up   | 0     | 0.01      |      | 0     | 0     |      | Uncharacterized protein                                                   |           |
| Pc_TC009414 | 0.2   | 0.87  |      | 0.64  | 0.54      |      | -3.96 | 0.03      | Down | -0.83 | 0.48  |      | Putative polyprotein                                                      |           |
| Pc_TC009427 | 3.99  | 0.03  | Up   | 0     | 1         |      | 3.5   | 0.15      |      | 2.21  | 0.47  |      | Expressed protein                                                         |           |
| Pc_TC009430 | -0.02 | 1     |      | 0.52  | 0.6       |      | -5.35 | 0.01      | Down | -2.43 | 0.04  | Down | Expressed protein                                                         |           |
| Pc_TC009444 | -0.66 | 0.18  |      | -0.19 | 0.74      |      | -4.14 | 0         | Down | -0.43 | 0.49  |      | XFP domain-containing protein                                             |           |
| Pc_TC009445 | 0     | 1     |      | 0     | 1         |      | 5.06  | 0.01      | Up   | 0     | 0.9   |      | Expressed protein                                                         |           |
| Pc_TC009447 | 1.43  | 0.08  |      | -0.18 | 0.93      |      | 0.8   | 0.56      |      | 1.98  | 0.03  | Up   | expansin B2                                                               |           |
| Pc_TC009453 | 1.2   | 0.03  | Up   | 1.68  | 0.01      | Up   | -0.55 | 0.62      |      | 0.59  | 0.4   |      | phytochrome and flowering time regulatory protein (PFT1)                  |           |
| Pc_TC009465 | 0.43  | 0.31  |      | 0.73  | 0.16      |      | -4.86 | 2.80E-005 | Down | -2.28 | 0     | Down | Expressed protein                                                         |           |

|             |       |       |      |       |           |      |       |           |      |       |       |      |                                                                          |      |
|-------------|-------|-------|------|-------|-----------|------|-------|-----------|------|-------|-------|------|--------------------------------------------------------------------------|------|
| Pc_TC009471 | 0.08  | 1     |      | 1.06  | 0.98      |      | 4.79  | 0.02      | Up   | 1.95  | 0.58  |      | Peroxidase superfamily protein                                           |      |
| Pc_TC009484 | 0.98  | 0.02  |      | 0.75  | 0.15      |      | -2.02 | 0.05      | Down | -0.47 | 0.44  |      | Cysteine proteinases superfamily protein                                 |      |
| Pc_TC009486 | 0.38  | 0.39  |      | 0.5   | 0.36      |      | -7.08 | 1.63E-007 | Down | -3.85 | ##### | Down | Expressed protein                                                        |      |
| Pc_TC009505 | -0.09 | 0.93  |      | 0.24  | 0.79      |      | -2.9  | 0.03      | Down | -1.06 | 0.24  |      | Basic-leucine zipper (bZIP) transcription factor family protein          | bZIP |
| Pc_TC009526 | 0.54  | 0.42  |      | 1.43  | 0.05      | Up   | -0.5  | 0.67      |      | 0.23  | 0.78  |      | Expressed protein                                                        |      |
| Pc_TC009529 | 3.33  | 0.03  | Up   | 0     | 0.67      |      | 2.2   | 0.34      |      | 1.63  | 0.49  |      | Expressed protein                                                        |      |
| Pc_TC009545 | 0.75  | 0.24  |      | -0.62 | 0.46      |      | 2.65  | 0.01      | Up   | 2.34  | 0     | Up   | Expressed protein                                                        |      |
| Pc_TC009547 | -0.3  | 0.65  |      | 0.46  | 0.52      |      | -4.18 | 0         | Down | -2.15 | 0.01  | Down | Expressed protein                                                        |      |
| Pc_TC009554 | 2.23  | 0.04  | Up   | 1.42  | 0.3       |      | 2.02  | 0.18      |      | 1.21  | 0.37  |      | Expressed protein                                                        |      |
| Pc_TC009568 | 0.24  | 0.57  |      | 1.42  | 0         | Up   | -4.22 | 0         | Down | -3.16 | ##### | Down | Expressed protein                                                        |      |
| Pc_TC009575 | 0.51  | 0.2   |      | 1.02  | 0.04      | Up   | -0.48 | 0.6       |      | -0.33 | 0.57  |      | F-box family protein                                                     |      |
| Pc_TC009607 | -0.17 | 0.66  |      | -0.44 | 0.38      |      | 2.78  | 0         | Up   | 1.52  | 0     | Up   | sucrose synthase 4                                                       |      |
| Pc_TC009635 | 0.87  | 0.26  |      | 0.94  | 0.28      |      | -1.37 | 0.32      |      | -3.83 | 0     | Down | Expressed protein                                                        |      |
| Pc_TC009645 | -1.44 | 0.01  | Down | -1.25 | 0.04      | Down | 1.11  | 0.23      |      | 0.21  | 0.73  |      | MuDR family transposase                                                  |      |
| Pc_TC009652 | -0.48 | 0.27  |      | -1.53 | 0.01      | Down | 1.44  | 0.11      |      | 0.76  | 0.18  |      | methionyl-tRNA synthetase                                                |      |
| Pc_TC009655 | 2.08  | 0.02  | Up   | 0     | 0.05      |      | 1.9   | 0.16      |      | 0.34  | 0.84  |      | Expressed protein                                                        |      |
| Pc_TC009656 | -2.24 | 0.23  |      | -1.68 | 0.39      |      | 3.74  | 0         | Up   | 0.83  | 0.52  |      | SLAC1 homologue 1                                                        |      |
| Pc_TC009665 | -1.32 | 0.02  | Down | -2.31 | 0         | Down | 1.38  | 0.15      |      | 0.06  | 0.93  |      | UDP-Glycosyltransferase superfamily protein                              |      |
| Pc_TC009677 | 0.92  | 0.04  |      | 0.63  | 0.27      |      | -7.25 | 4.49E-007 | Down | -3.63 | ##### | Down | F-box domain containing protein,expressed                                |      |
| Pc_TC009701 | 0.65  | 0.08  |      | 1.24  | 0.01      | Up   | -4.98 | 6.13E-006 | Down | -1.69 | 0     | Down | homeobox 7                                                               | HB   |
| Pc_TC009711 | -0.3  | 0.38  |      | -1.16 | 0.01      | Down | 1.35  | 0.11      |      | 0.72  | 0.16  |      | acclimation of photosynthesis to environment                             |      |
| Pc_TC009715 | -0.61 | 0.6   |      | 0.19  | 0.9       |      | -2.57 | 0.12      |      | -2.77 | 0.04  | Down | Expressed protein                                                        |      |
| Pc_TC009722 | 2.4   | 0.04  | Up   | -0.26 | 1         |      | 1.35  | 0.47      |      | 1.89  | 0.17  |      | aldehyde oxidase 1                                                       |      |
| Pc_TC009725 | -0.62 | 0.55  |      | -3.06 | 0.03      | Down | 0.05  | 1         |      | -0.27 | 0.82  |      | Expressed protein                                                        |      |
| Pc_TC009730 | 1.84  | 0.16  |      | 2.13  | 0.12      |      | -0.01 | 1         |      | 2.66  | 0.03  | Up   | MATE efflux family protein                                               |      |
| Pc_TC009734 | -1.57 | 0.18  |      | 1.21  | 0.2       |      | -4.96 | 0.02      | Down | -0.51 | 0.67  |      | Uncharacterized protein                                                  |      |
| Pc_TC009743 | 2.08  | 0.13  |      | 0.06  | 1         |      | 2.09  | 0.24      |      | 3.15  | 0.01  | Up   | Uncharacterized protein                                                  |      |
| Pc_TC009746 | 0.82  | 0.43  |      | 2.03  | 0.03      | Up   | 0     | 0.02      |      | -0.96 | 0.48  |      | Expressed protein                                                        |      |
| Pc_TC009789 | 0.18  | 0.88  |      | 0.92  | 0.32      |      | -2.3  | 0.12      |      | -2.86 | 0.02  | Down | Expressed protein                                                        |      |
| Pc_TC009793 | 0     | ##### |      | -1.98 | 0.08      |      | -5.71 | 0         | Down | -4.58 | 0     | Down | Expressed protein                                                        |      |
| Pc_TC009801 | -1.24 | 0.22  |      | 0.47  | 0.63      |      | -3.4  | 0.03      | Down | -2.28 | 0.05  | Down | Expressed protein                                                        |      |
| Pc_TC009816 | -0.85 | 0.11  |      | -1.36 | 0.04      | Down | 1.64  | 0.08      |      | 0.75  | 0.23  |      | unknown protein                                                          |      |
| Pc_TC009825 | 0.68  | 0.41  |      | 1.74  | 0.04      | Up   | -2.18 | 0.14      |      | -1.33 | 0.22  |      | Expressed protein                                                        |      |
| Pc_TC009838 | 0.06  | 0.94  |      | 0.21  | 0.79      |      | -2.58 | 0.04      | Down | -0.3  | 0.71  |      | S-adenosyl-L-methionine-dependent methyltransferases superfamily protein |      |
| Pc_TC009842 | 0.08  | 1     |      | -0.53 | 0.89      |      | 2.9   | 0.05      | Up   | 1.63  | 0.22  |      | Uncharacterized protein                                                  |      |
| Pc_TC009851 | 2.94  | ##### | Up   | 0     | 0         |      | 1.38  | 0.25      |      | 0.31  | 0.77  |      | RAS-related GTP-binding nuclear protein 2                                |      |
| Pc_TC009857 | -1.33 | 0.11  |      | -0.15 | 0.89      |      | -3.64 | 0.01      | Down | -1.64 | 0.08  |      | Expressed protein                                                        |      |
| Pc_TC009864 | -1.02 | 0.14  |      | 0.16  | 0.84      |      | -1.16 | 0.31      |      | -1.99 | 0.02  | Down | high-affinity K+ transporter 1                                           |      |
| Pc_TC009865 | 2.4   | 0.06  |      | 2.92  | 0.03      | Up   | 2.83  | 0.08      |      | 2.33  | 0.09  |      | Expressed protein                                                        |      |
| Pc_TC009869 | 1.06  | 0.09  |      | 1.5   | 0.03      | Up   | -2.58 | 0.04      | Down | -0.63 | 0.45  |      | Expressed protein                                                        |      |
| Pc_TC009889 | 2.99  | 0     | Up   | 0     | 0.04      |      | 3.27  | 0.01      | Up   | 1.53  | 0.15  |      | Expressed protein                                                        |      |
| Pc_TC009896 | 0.22  | 0.72  |      | 0.68  | 0.32      |      | -5.79 | 9.64E-005 | Down | -1.97 | 0.01  | Down | Protein of unknown function (DUF1264)                                    |      |
| Pc_TC009913 | -1.34 | 0.18  |      | 0.67  | 0.47      |      | -2.17 | 0.13      |      | -2.79 | 0.02  | Down | Expressed protein                                                        |      |
| Pc_TC009933 | 1.34  | 0.37  |      | 2.54  | 0.05      | Up   | 1.27  | 0.5       |      | 1.55  | 0.29  |      | Putative uncharacterized protein                                         |      |
| Pc_TC009934 | -1.34 | 0.02  | Down | -0.07 | 0.92      |      | -1.89 | 0.08      |      | -1.53 | 0.03  | Down | Uncharacterized protein                                                  |      |
| Pc_TC009935 | -0.89 | 0.15  |      | 0.5   | 0.46      |      | -3.16 | 0.01      | Down | -1.71 | 0.03  | Down | Uncharacterized protein                                                  |      |
| Pc_TC009936 | -1.89 | 0.01  | Down | -3.04 | 0         | Down | -2.88 | 0.02      | Down | -2.84 | 0     | Down | Putative uncharacterized protein                                         |      |
| Pc_TC009938 | -2.75 | 0     | Down | -1.07 | 0.24      |      | -5.33 | 0         | Down | -0.62 | 0.48  |      | Putative uncharacterized protein                                         |      |
| Pc_TC009939 | -2.16 | 0     | Down | -2.34 | 0         | Down | -1.06 | 0.3       |      | -2.02 | 0     | Down | Uncharacterized protein                                                  |      |
| Pc_TC009940 | -1.46 | 0     | Down | -0.56 | 0.34      |      | -2.65 | 0.01      | Down | -2.65 | 0     | Down | Uncharacterized protein                                                  |      |
| Pc_TC009941 | -1.95 | 0     | Down | -1.46 | 0.03      | Down | -2.3  | 0.03      | Down | -2.6  | 0     | Down | Conserved domain protein (Fragment)                                      |      |
| Pc_TC009942 | -2.38 | ##### | Down | -0.4  | 0.49      |      | -2.33 | 0.02      | Down | -0.19 | 0.76  |      | Putative uncharacterized protein (Fragment)                              |      |
| Pc_TC009943 | -1.56 | 0.03  | Down | -1.24 | 0.12      |      | -0.9  | 0.42      |      | -1.68 | 0.04  | Down | Cell wall-associated hydrolase (Fragment)                                |      |
| Pc_TC009944 | -2.98 | ##### | Down | -3.29 | 1.50E-006 | Down | -2.27 | 0.03      | Down | -4.39 | ##### | Down | Uncharacterized protein                                                  |      |
| Pc_TC009945 | -2.14 | 0     | Down | -1.54 | 0.05      |      | -2.35 | 0.05      | Down | -3.86 | ##### | Down | Putative glycosyl transferase (Glycosyl transferase family 2)            |      |
| Pc_TC009946 | -3.01 | 0     | Down | -2.89 | 0         | Down | -2.66 | 0.03      | Down | -3.32 | 0     | Down | Uncharacterized protein                                                  |      |
| Pc_TC009947 | -1.49 | 0.01  | Down | -0.15 | 0.8       |      | -1.31 | 0.2       |      | -1.78 | 0.01  | Down | Putative uncharacterized protein                                         |      |
| Pc_TC009949 | -2.14 | 0.01  | Down | -3.26 | 0         | Down | -1.98 | 0.11      |      | -6.5  | ##### | Down | Uncharacterized protein                                                  |      |
| Pc_TC009950 | -4.54 | 0     | Down | -3.23 | 0.01      | Down | -2.2  | 0.1       |      | -2.18 | 0.03  | Down | Cell wall-associated hydrolase                                           |      |
| Pc_TC009951 | -3.08 | ##### | Down | -2.13 | 0         | Down | -0.63 | 0.52      |      | -1.89 | 0.01  | Down | Cell wall-associated hydrolase                                           |      |
| Pc_TC009952 | -2.1  | ##### | Down | -0.71 | 0.18      |      | -2.02 | 0.04      | Down | -2.95 | ##### | Down | Uncharacterized protein                                                  |      |
| Pc_TC009953 | -2.01 | 0     | Down | -1.22 | 0.1       |      | -1.33 | 0.22      |      | -2.54 | 0     | Down | Uncharacterized protein                                                  |      |

|             |       |       |      |       |           |      |       |           |      |       |       |      |                                                                   |
|-------------|-------|-------|------|-------|-----------|------|-------|-----------|------|-------|-------|------|-------------------------------------------------------------------|
| Pc_TC009954 | -3.13 | 0     | Down | -2.69 | 0.01      | Down | -3.25 | 0.01      | Down | -2.58 | 0.01  | Down | Uncharacterized protein                                           |
| Pc_TC009955 | -1    | 0.06  |      | -1.09 | 0.09      |      | -1.29 | 0.21      |      | -2.02 | 0     | Down | Uncharacterized protein (Fragment)                                |
| Pc_TC009956 | -1.87 | 0.01  | Down | 0.06  | 0.95      |      | -1.4  | 0.22      |      | -0.58 | 0.44  |      | Conserved domain protein (Fragment)                               |
| Pc_TC009957 | -1.09 | 0.13  |      | -0.96 | 0.24      |      | -0.33 | 0.77      |      | -2.84 | 0     | Down | Uncharacterized protein                                           |
| Pc_TC009958 | -3.83 | ##### | Down | -2.26 | 0.02      | Down | -3.73 | 0.01      | Down | -5.02 | ##### | Down | Cell wall-associated hydrolase                                    |
| Pc_TC009959 | -0.38 | 0.22  |      | 1.41  | 0         | Up   | -0.62 | 0.45      |      | -0.8  | 0.11  |      | Putative uncharacterized protein                                  |
| Pc_TC009961 | -2.43 | ##### | Down | -1.78 | 0         | Down | -1.49 | 0.12      |      | -2.95 | ##### | Down | Putative uncharacterized protein                                  |
| Pc_TC009962 | -2.71 | ##### | Down | -1.05 | 0.09      |      | -3.37 | 0         | Down | -3.13 | ##### | Down | Uncharacterized protein                                           |
| Pc_TC009963 | -2.12 | 0     | Down | -1.27 | 0.07      |      | -2.5  | 0.03      | Down | -3.97 | ##### | Down | Cell wall-associated hydrolase                                    |
| Pc_TC009964 | -3.24 | ##### | Down | -2.92 | 1.03E-005 | Down | -0.68 | 0.48      |      | -2.77 | ##### | Down | Uncharacterized protein                                           |
| Pc_TC009965 | -2.5  | ##### | Down | -1.76 | 0         | Down | -1.83 | 0.04      | Down | -3.2  | ##### | Down | Putative uncharacterized protein                                  |
| Pc_TC009966 | -3.45 | 0     | Down | -1.1  | 0.21      |      | -0.65 | 0.58      |      | -3.68 | 0     | Down | Uncharacterized protein                                           |
| Pc_TC009967 | -2.44 | 0     | Down | -1.24 | 0.14      |      | -0.64 | 0.58      |      | -2.1  | 0.02  | Down | Uncharacterized protein (Fragment)                                |
| Pc_TC009969 | -3.06 | ##### | Down | -2.85 | 1.95E-006 | Down | -0.18 | 0.84      |      | -2.05 | 0     | Down | Uncharacterized protein                                           |
| Pc_TC009971 | -2.82 | ##### | Down | -1.79 | 0         | Down | -2.38 | 0.02      | Down | -4.2  | ##### | Down | Uncharacterized protein                                           |
| Pc_TC009987 | 2.63  | 0     | Up   | 0     | 0.01      |      | 1.83  | 0.14      |      | 0.9   | 0.37  |      | Expressed protein                                                 |
| Pc_TC009989 | 2.41  | ##### | Up   | 0     | 2.95E-011 |      | 1.93  | 0.05      | Up   | 0.56  | 0.39  |      | cytochrome P450, family 711, subfamily A, polypeptide 1           |
| Pc_TC009990 | 1.44  | 0.05  | Up   | 0     | 0         |      | 1.12  | 0.35      |      | 0.17  | 0.89  |      | Chitin deacetylase 1                                              |
| Pc_TC009992 | 1.19  | 0.01  | Up   | -7.42 | 2.92E-013 | Down | 1.41  | 0.13      |      | -0.52 | 0.41  |      | Expressed protein                                                 |
| Pc_TC009993 | 1.61  | 0.01  | Up   | 0     | 6.03E-006 |      | 1.63  | 0.13      |      | 0.16  | 0.86  |      | Expressed protein                                                 |
| Pc_TC009994 | 1.36  | 0.01  | Up   | 0     | 2.38E-009 |      | 1.44  | 0.16      |      | 0.81  | 0.24  |      | Expressed protein                                                 |
| Pc_TC009995 | 1.48  | 0.01  | Up   | 0     | 1.10E-008 |      | 0.92  | 0.37      |      | -0.17 | 0.83  |      | Uncharacterized protein                                           |
| Pc_TC009997 | 1.93  | 0.01  | Up   | 0     | 0         |      | 0.74  | 0.56      |      | -0.01 | 1     |      | Uncharacterized protein                                           |
| Pc_TC009998 | 1.97  | 0     | Up   | 0     | 1.76E-006 |      | 2.76  | 0.01      | Up   | 1.34  | 0.07  |      | Expressed protein                                                 |
| Pc_TC009999 | 4.75  | ##### | Up   | 0     | 0.67      |      | 5.13  | 0         | Up   | 2.33  | 0.22  |      | Putative polyprotein                                              |
| Pc_TC010008 | -1.29 | 0.05  | Down | -0.53 | 0.47      |      | 0.17  | 0.88      |      | -0.17 | 0.82  |      | Uncharacterized protein                                           |
| Pc_TC010020 | -1.46 | 0.01  | Down | -0.25 | 0.69      |      | -0.08 | 0.94      |      | -0.38 | 0.56  |      | Expressed protein                                                 |
| Pc_TC010049 | -1.04 | 0.02  | Down | -0.2  | 0.71      |      | 0.04  | 0.97      |      | -0.52 | 0.38  |      | ARM repeat superfamily protein                                    |
| Pc_TC010063 | 0.18  | 0.94  |      | -0.58 | 0.72      |      | -1.3  | 0.45      |      | -4.18 | 0.03  | Down | OSINBb0072N21.12 protein                                          |
| Pc_TC010068 | -2.06 | 0.01  | Down | -0.59 | 0.49      |      | -0.35 | 0.77      |      | -1.03 | 0.23  |      | Predicted protein (Fragment)                                      |
| Pc_TC010069 | 1.04  | 0     | Up   | 0     | 2.52E-031 |      | 1.9   | 0.03      | Up   | 0.98  | 0.06  |      | Expressed protein                                                 |
| Pc_TC010071 | -0.08 | 0.91  |      | 0     | 1.73E-007 |      | 0.69  | 0.52      |      | -3.02 | 0     | Down | Expressed protein                                                 |
| Pc_TC010079 | -0.27 | 0.55  |      | 0.68  | 0.19      |      | -1.91 | 0.06      |      | -1.84 | 0     | Down | pleckstrin homology (PH) domain-containing protein                |
| Pc_TC010080 | -0.35 | 0.36  |      | 0.47  | 0.31      |      | -2.44 | 0.01      | Down | -0.83 | 0.14  |      | pleckstrin homology (PH) domain-containing protein                |
| Pc_TC010082 | 0.37  | 0.33  |      | 0.3   | 0.52      |      | -2.76 | 0         | Down | -1.33 | 0.02  | Down | pleckstrin homology (PH) domain-containing protein                |
| Pc_TC010083 | -1.02 | 0.04  | Down | 1     | 0.06      |      | -1.4  | 0.16      |      | -0.12 | 0.84  |      | pleckstrin homology (PH) domain-containing protein                |
| Pc_TC010084 | -0.32 | 0.34  |      | 0.83  | 0.04      |      | -2.32 | 0.01      | Down | -1.68 | 0     | Down | pleckstrin homology (PH) domain-containing protein                |
| Pc_TC010164 | 0.24  | 0.58  |      | -8.14 | 3.07E-017 | Down | 0.92  | 0.31      |      | -0.12 | 0.84  |      | Fibronin heavy chain (Fragment)                                   |
| Pc_TC010169 | 0     | 1     |      | 0.13  | 0.81      |      | -1.81 | 0.07      |      | -1.66 | 0.01  | Down | Expressed protein                                                 |
| Pc_TC010170 | -3.62 | 0.06  |      | 0     | 0.03      |      | -3.2  | 0.12      |      | -4.08 | 0.04  | Down | Expressed protein                                                 |
| Pc_TC010171 | 0.09  | 0.81  |      | 0.28  | 0.55      |      | -1.57 | 0.09      |      | -1.66 | 0     | Down | Putative uncharacterized protein                                  |
| Pc_TC010172 | -1.09 | 0.55  |      | -1.53 | 0.46      |      | 3.61  | 0.01      | Up   | 1.04  | 0.42  |      | xylem bark cysteine peptidase 3                                   |
| Pc_TC010173 | -2.11 | ##### | Down | -1.23 | 0.04      | Down | 2.09  | 0.02      | Up   | -0.69 | 0.27  |      | Granulin repeat cysteine protease family protein                  |
| Pc_TC010174 | -1.57 | 0.02  | Down | -4.76 | 1.68E-006 | Down | 1.72  | 0.09      |      | -0.01 | 0.99  |      | Granulin repeat cysteine protease family protein                  |
| Pc_TC010175 | -1.21 | 0.07  |      | -3.16 | 0         | Down | 1.24  | 0.23      |      | 0.17  | 0.83  |      | Cysteine proteinases superfamily protein                          |
| Pc_TC010176 | -1.14 | 0.01  | Down | -2.74 | 1.06E-005 | Down | 1.22  | 0.17      |      | 0     | 1     |      | Cysteine proteinases superfamily protein                          |
| Pc_TC010179 | -1.65 | 0.02  | Down | -0.86 | 0.26      |      | 0.95  | 0.37      |      | -0.58 | 0.44  |      | Os01g0946800 protein                                              |
| Pc_TC010188 | -0.81 | 0.08  |      | -1.2  | 0.04      | Down | 0.03  | 0.98      |      | -0.31 | 0.61  |      | DNA/RNA polymerases superfamily protein                           |
| Pc_TC010203 | -2.03 | 0.02  | Down | -1.11 | 0.23      |      | -0.47 | 0.7       |      | -0.54 | 0.54  |      | Expressed protein                                                 |
| Pc_TC010220 | -1.28 | 0.07  |      | -0.7  | 0.37      |      | 2.68  | 0.01      | Up   | 1.39  | 0.05  | Up   | kinesin like protein for actin based chloroplast movement 2       |
| Pc_TC010227 | -1.4  | 0.04  | Down | -0.69 | 0.36      |      | -1.35 | 0.23      |      | -0.45 | 0.55  |      | Uncharacterized protein                                           |
| Pc_TC010234 | -0.3  | 0.66  |      | -1.87 | 0.03      | Down | -0.1  | 0.93      |      | -0.27 | 0.73  |      | EDM2-like protein1                                                |
| Pc_TC010236 | -0.28 | 0.62  |      | -1.44 | 0.04      | Down | 1.29  | 0.19      |      | 1.02  | 0.12  |      | EDM2-like protein1                                                |
| Pc_TC010244 | -1.16 | 0.05  | Down | -0.16 | 0.82      |      | -2.43 | 0.03      | Down | -0.19 | 0.78  |      | autoinhibited Ca(2+)-ATPase 9                                     |
| Pc_TC010245 | 3.9   | ##### | Up   | 0     | 1.16E-005 |      | 3.17  | 0         | Up   | 1.82  | 0.01  | Up   | Expressed protein                                                 |
| Pc_TC010246 | 2.28  | ##### | Up   | 0     | 2.02E-009 |      | 1.85  | 0.07      |      | -0.44 | 0.55  |      | Glycosyl hydrolase family protein with chitinase insertion domain |
| Pc_TC010247 | 3.41  | ##### | Up   | 0     | 8.97E-015 |      | 2.71  | 0         | Up   | 1.32  | 0.03  | Up   | Uncharacterized protein                                           |
| Pc_TC010249 | 1.87  | 0     | Up   | 0     | 6.39E-008 |      | 1.25  | 0.23      |      | 0.49  | 0.5   |      | Expressed protein                                                 |
| Pc_TC010250 | 3.72  | 0.01  | Up   | 0     | 0.67      |      | 3.26  | 0.09      |      | 1.43  | 0.58  |      | Uncharacterized protein                                           |
| Pc_TC010252 | 0.02  | 0.98  |      | -0.17 | 0.78      |      | -1.91 | 0.06      |      | -1.27 | 0.05  | Down | Na+/H+ antiporter 6                                               |
| Pc_TC010254 | -0.41 | 0.34  |      | 0.39  | 0.44      |      | -4.53 | 5.14E-005 | Down | -1.9  | 0     | Down | Na+/H+ antiporter 6                                               |
| Pc_TC010256 | 2.47  | ##### | Up   | 0     | 5.01E-007 |      | 1.94  | 0.06      |      | 0.81  | 0.27  |      | Expressed protein                                                 |

|             |       |       |      |       |           |      |       |      |      |       |      |      |                                                                     |     |
|-------------|-------|-------|------|-------|-----------|------|-------|------|------|-------|------|------|---------------------------------------------------------------------|-----|
| Pc_TC010257 | 1.35  | 0     | Up   | 0     | 6.10E-015 |      | 1.72  | 0.07 |      | 0.17  | 0.79 |      | sequence-specific DNA binding transcription factors                 |     |
| Pc_TC010258 | 2.15  | ##### | Up   | 0     | 2.60E-012 |      | 1.98  | 0.04 | Up   | 0.14  | 0.84 |      | Serine protease inhibitor (SERPIN) family protein                   |     |
| Pc_TC010262 | -1.41 | 0.04  | Down | -1.11 | 0.15      |      | 0.5   | 0.64 |      | 0.03  | 0.98 |      | ATP binding;valine-tRNA ligases                                     |     |
| Pc_TC010269 | 1.83  | 0.01  | Up   | 0     | 0         |      | 2.1   | 0.08 |      | 0.77  | 0.43 |      | Uncharacterized protein                                             |     |
| Pc_TC010270 | 2.63  | ##### | Up   | 0     | 6.39E-008 |      | 2.07  | 0.04 | Up   | 0.68  | 0.34 |      | sequence-specific DNA binding transcription factors                 |     |
| Pc_TC010271 | 4.24  | ##### | Up   | 0     | 0.01      |      | 3.25  | 0.01 | Up   | 2.75  | 0    | Up   | Expressed protein                                                   |     |
| Pc_TC010292 | -1.14 | 0.01  | Down | -0.71 | 0.16      |      | 0.61  | 0.49 |      | 0.19  | 0.72 |      | glucan synthase-like 8                                              |     |
| Pc_TC010306 | 0.26  | 0.4   |      | 0.41  | 0.3       |      | -2.11 | 0.02 | Down | -1.27 | 0.01 | Down | Adenosylmethionine decarboxylase family protein                     |     |
| Pc_TC010319 | 1.01  | 0.02  | Up   | 1.59  | 0         | Up   | -2.54 | 0.02 | Down | -0.18 | 0.77 |      | Putative uncharacterized protein OSJNB0026F09.30                    |     |
| Pc_TC010320 | -0.22 | 0.51  |      | 0.41  | 0.34      |      | -2.46 | 0.01 | Down | -2.01 | 0    | Down | Putative uncharacterized protein                                    |     |
| Pc_TC010324 | -1.33 | 0.04  | Down | -1.27 | 0.09      |      | 0.68  | 0.51 |      | 0.91  | 0.18 |      | unknown protein.                                                    |     |
| Pc_TC010325 | 0.06  | 0.94  |      | -0.29 | 0.69      |      | 2.02  | 0.05 | Up   | 1.2   | 0.07 |      | unknown protein.                                                    |     |
| Pc_TC010326 | -0.75 | 0.34  |      | -1.14 | 0.22      |      | 2.47  | 0.02 | Up   | 1.34  | 0.08 |      | unknown protein.                                                    |     |
| Pc_TC010327 | 0.88  | 0.28  |      | -0.11 | 0.96      |      | 3.3   | 0    | Up   | 1.66  | 0.05 |      | unknown protein.                                                    |     |
| Pc_TC010328 | -1.37 | 0.05  | Down | -1.96 | 0.02      | Down | 0.86  | 0.41 |      | -0.25 | 0.75 |      | unknown protein.                                                    |     |
| Pc_TC010340 | -0.35 | 0.48  |      | 0.07  | 0.91      |      | -1.26 | 0.21 |      | -1.61 | 0.02 | Down | Putative uncharacterized protein                                    |     |
| Pc_TC010368 | 0.15  | 0.81  |      | -0.72 | 0.32      |      | 1.51  | 0.14 |      | 1.68  | 0.01 | Up   | O-Glycosyl hydrolases family 17 protein                             |     |
| Pc_TC010369 | 0.32  | 0.47  |      | -0.54 | 0.35      |      | 1.78  | 0.05 |      | 2.08  | 0    | Up   | O-Glycosyl hydrolases family 17 protein                             |     |
| Pc_TC010376 | -2.42 | 0.02  | Down | -2.44 | 0.04      | Down | -0.09 | 0.96 |      | 1.03  | 0.23 |      | Putative uncharacterized protein (Fragment)                         |     |
| Pc_TC010384 | -0.07 | 0.91  |      | -0.79 | 0.27      |      | 2.75  | 0.01 | Up   | 1.01  | 0.13 |      | Wound-responsive family protein                                     |     |
| Pc_TC010385 | 2.34  | ##### | Up   | 0     | 1.09E-016 |      | 2.46  | 0.01 | Up   | 1.44  | 0.01 | Up   | Expressed protein                                                   |     |
| Pc_TC010386 | 2.31  | ##### | Up   | 0     | 2.58E-013 |      | 2.51  | 0.01 | Up   | 1.38  | 0.02 | Up   | Expressed protein                                                   |     |
| Pc_TC010387 | 2.23  | ##### | Up   | 0     | 3.38E-011 |      | 2.33  | 0.02 | Up   | 1.6   | 0.01 | Up   | Expressed protein                                                   |     |
| Pc_TC010388 | 2.23  | ##### | Up   | 0     | 1.96E-019 |      | 2.42  | 0.01 | Up   | 1.54  | 0.01 | Up   | Expressed protein                                                   |     |
| Pc_TC010393 | 5.34  | ##### | Up   | 0     | 0.11      |      | 3.67  | 0.01 | Up   | 1.75  | 0.13 |      | Putative mutator-like transposase                                   |     |
| Pc_TC010394 | 4.47  | ##### | Up   | 0     | 4.69E-005 |      | 3.33  | 0    | Up   | 0.97  | 0.22 |      | Protein of unknown function (DUF1216)                               |     |
| Pc_TC010402 | -1.37 | 0.01  | Down | -0.92 | 0.13      |      | 1.1   | 0.24 |      | 0.17  | 0.79 |      | Protein of unknown function (DUF3414)                               |     |
| Pc_TC010404 | -0.97 | 0.07  |      | -1.95 | 0         | Down | 0.5   | 0.61 |      | 0.04  | 0.95 |      | Protein kinase superfamily protein                                  |     |
| Pc_TC010408 | -0.74 | 0.02  |      | -1.01 | 0.01      | Down | 1.81  | 0.03 | Up   | 0.9   | 0.07 |      | Tetratricopeptide repeat (TPR)-like superfamily protein             |     |
| Pc_TC010410 | -1.16 | 0.04  | Down | -1.66 | 0.02      | Down | -0.59 | 0.56 |      | -0.15 | 0.82 |      | Uncharacterized protein                                             |     |
| Pc_TC010413 | 0.66  | 0.97  |      | -0.94 | 1         |      | 4.36  | 0.01 | Up   | 2.95  | 0.08 |      | Expressed protein                                                   |     |
| Pc_TC010415 | 0.58  | 0.07  |      | 1.13  | 0.01      | Up   | -3.26 | 0    | Down | -0.9  | 0.08 |      | prenylcysteine methylesterase                                       |     |
| Pc_TC010416 | 0.77  | 0.43  |      | -3.11 | 0.06      |      | 2.96  | 0.01 | Up   | 0.81  | 0.44 |      | AAA-type ATPase family protein                                      |     |
| Pc_TC010417 | -1.92 | 0.01  | Down | -1.67 | 0.05      | Down | 0.82  | 0.44 |      | 0.04  | 0.97 |      | AAA-type ATPase family protein                                      |     |
| Pc_TC010418 | -1.74 | 0.02  | Down | -1.76 | 0.04      | Down | 1.3   | 0.22 |      | -0.39 | 0.62 |      | AAA-type ATPase family protein                                      |     |
| Pc_TC010419 | 1.56  | 0.02  | Up   | 1.5   | 0.06      |      | 1.12  | 0.33 |      | 1.31  | 0.1  |      | ILITYHIA                                                            |     |
| Pc_TC010432 | 0.47  | 0.18  |      | -0.11 | 0.82      |      | 1.91  | 0.03 | Up   | 1.11  | 0.03 | Up   | phosphoglucomutase,putative / glucose phosphomutase,putative        |     |
| Pc_TC010448 | -1.84 | 0.03  | Down | 0.62  | 0.45      |      | -1.83 | 0.15 |      | -1.85 | 0.05 |      | ACT-like protein tyrosine kinase family protein                     |     |
| Pc_TC010450 | 0.45  | 0.13  |      | 0.3   | 0.44      |      | -2.35 | 0.01 | Down | -0.9  | 0.07 |      | Thiamin diphosphate-binding fold (THDP-binding) superfamily protein |     |
| Pc_TC010452 | 0.29  | 0.34  |      | 0.31  | 0.42      |      | -1.8  | 0.03 | Down | -0.75 | 0.13 |      | Thiamin diphosphate-binding fold (THDP-binding) superfamily protein |     |
| Pc_TC010454 | 0.3   | 0.32  |      | 0.91  | 0.02      |      | -2.05 | 0.02 | Down | -0.9  | 0.07 |      | heavy metal atpase 4                                                |     |
| Pc_TC010474 | 0.66  | 0.03  |      | 0.63  | 0.11      |      | -1.91 | 0.03 | Down | 0.2   | 0.68 |      | unknown protein                                                     |     |
| Pc_TC010486 | -1.01 | 0.02  | Down | -0.68 | 0.19      |      | -0.45 | 0.62 |      | -0.82 | 0.16 |      | E3 ubiquitin ligase,putative                                        |     |
| Pc_TC010489 | 0.72  | 0.03  |      | 1.04  | 0.01      | Up   | -1.06 | 0.23 |      | 0.03  | 0.95 |      | FAD-binding Berberine family protein                                |     |
| Pc_TC010495 | 0.45  | 0.16  |      | 1.29  | 0         | Up   | -1.95 | 0.03 | Down | -0.6  | 0.24 |      | alternative oxidase 1A                                              |     |
| Pc_TC010506 | -2.19 | 0     | Down | 0.14  | 0.84      |      | 1.08  | 0.29 |      | 0.95  | 0.16 |      | SET domain protein 2                                                |     |
| Pc_TC010511 | -0.43 | 0.54  |      | -0.25 | 0.76      |      | -2.43 | 0.05 | Down | -0.79 | 0.33 |      | Expressed protein                                                   |     |
| Pc_TC010512 | 0.36  | 0.64  |      | 1.58  | 0.04      | Up   | -0.32 | 0.8  |      | 1.27  | 0.11 |      | Os01g0275900 protein                                                |     |
| Pc_TC010516 | 0.82  | 0.54  |      | 0.21  | 0.96      |      | 3.41  | 0.01 | Up   | 2.43  | 0.02 | Up   | Expressed protein                                                   |     |
| Pc_TC010529 | -1.86 | 0.01  | Down | -0.94 | 0.24      |      | 1.87  | 0.07 |      | 0.26  | 0.73 |      | Expressed protein                                                   |     |
| Pc_TC010538 | 2.54  | 0.15  |      | 2.06  | 0.36      |      | 4.03  | 0.02 | Up   | 2.63  | 0.14 |      | Expressed protein                                                   |     |
| Pc_TC010543 | -0.05 | 0.92  |      | -0.05 | 0.93      |      | -2.62 | 0.01 | Down | -2.23 | 0    | Down | homology to ABI2                                                    |     |
| Pc_TC010551 | 0.85  | 0.01  |      | 1.36  | 0         | Up   | -1.78 | 0.05 | Down | -0.59 | 0.26 |      | chitinase A                                                         |     |
| Pc_TC010552 | -2.07 | 0.01  | Down | -3.09 | 0         | Down | -0.27 | 0.82 |      | -0.59 | 0.47 |      | Expressed protein                                                   |     |
| Pc_TC010559 | -1.04 | 0.05  | Down | -0.87 | 0.16      |      | -0.26 | 0.79 |      | -0.04 | 0.96 |      | hydroxyproline-rich glycoprotein family protein                     |     |
| Pc_TC010567 | -0.03 | 0.99  |      | -1.82 | 0.05      | Down | 0.62  | 0.58 |      | 0.9   | 0.23 |      | NAD(P)-binding Rossmann-fold superfamily protein                    |     |
| Pc_TC010575 | 0.67  | 0.02  |      | 0.89  | 0.02      |      | -1.69 | 0.04 | Down | 0.01  | 0.98 |      | Galactose oxidase/kelch repeat superfamily protein                  |     |
| Pc_TC010578 | 0.88  | 0.18  |      | 0.89  | 0.25      |      | -2.64 | 0.04 | Down | -1.16 | 0.19 |      | heat shock factor 3                                                 | HSF |
| Pc_TC010579 | 0.28  | 0.61  |      | 0.3   | 0.65      |      | 1.1   | 0.27 |      | 1.38  | 0.03 | Up   | FAD/NAD(P)-binding oxidoreductase family protein                    |     |
| Pc_TC010635 | -2.92 | 0.01  | Down | -0.48 | 0.66      |      | 0.36  | 0.79 |      | -0.42 | 0.69 |      | Expressed protein                                                   |     |
| Pc_TC010638 | 2.59  | ##### | Up   | 0     | 1.61E-012 |      | 2.49  | 0.01 | Up   | 0.95  | 0.13 |      | Uncharacterized protein                                             |     |
| Pc_TC010657 | 1.54  | ##### | Up   | 0     | 2.18E-025 |      | 1.02  | 0.24 |      | 0.83  | 0.12 |      | beta glucosidase 42                                                 |     |

|             |       |       |      |       |           |      |  |       |           |      |       |       |      |                                                                             |         |
|-------------|-------|-------|------|-------|-----------|------|--|-------|-----------|------|-------|-------|------|-----------------------------------------------------------------------------|---------|
| Pc_TC010665 | -1.51 | 0.01  | Down | -1.01 | 0.14      |      |  | 0.96  | 0.34      |      | 0.11  | 0.87  |      | Putative uncharacterized protein                                            |         |
| Pc_TC010668 | 0.95  | 0.17  |      | 1.44  | 0.06      |      |  | 1.33  | 0.24      |      | 1.62  | 0.03  | Up   | unknown protein                                                             |         |
| Pc_TC010678 | -1.33 | 0.02  | Down | -1.11 | 0.1       |      |  | -0.15 | 0.89      |      | -0.35 | 0.6   |      | Expressed protein                                                           |         |
| Pc_TC010679 | -0.59 | 0.27  |      | -0.23 | 0.72      |      |  | -1.26 | 0.23      |      | -1.87 | 0.01  | Down | ZIP metal ion transporter family                                            |         |
| Pc_TC010683 | 1.85  | 0.04  | Up   | 0.87  | 0.49      |      |  | 2.34  | 0.07      |      | 2.61  | 0.01  | Up   | Putative uncharacterized protein                                            |         |
| Pc_TC010688 | 0.51  | 0.07  |      | 0.54  | 0.14      |      |  | -2.1  | 0.01      | Down | -1.3  | 0.01  | Down | tubby like protein 1                                                        | TUB     |
| Pc_TC010692 | 0.09  | 0.89  |      | 1.74  | 0.01      | Up   |  | -0.1  | 0.93      |      | -0.26 | 0.73  |      | Expressed protein                                                           |         |
| Pc_TC010694 | 1.27  | 0.04  | Up   | 0     | 6.03E-006 |      |  | 1.68  | 0.12      |      | -0.29 | 0.74  |      | Uncharacterized protein                                                     |         |
| Pc_TC010698 | 2.02  | 0     | Up   | 0     | 0         |      |  | 5.16  | 4.36E-006 | Up   | -0.81 | 0.46  |      | copper/zinc superoxide dismutase 2                                          |         |
| Pc_TC010701 | 3.77  | ##### | Up   | 0     | 0         |      |  | 4.25  | 0         | Up   | 1.44  | 0.11  |      | ARP protein (REF)                                                           |         |
| Pc_TC010702 | 2.74  | ##### | Up   | 0     | 0         |      |  | 3.22  | 0         | Up   | 0.65  | 0.48  |      | ARP protein (REF)                                                           |         |
| Pc_TC010703 | 2.66  | 0.01  | Up   | 0     | 0.2       |      |  | 2.92  | 0.04      | Up   | 1.95  | 0.12  |      | Expressed protein                                                           |         |
| Pc_TC010708 | -0.12 | 0.85  |      | -0.42 | 0.55      |      |  | 2.23  | 0.03      | Up   | 1.29  | 0.05  |      | Cyclin D2;1                                                                 |         |
| Pc_TC010709 | -0.52 | 0.55  |      | -0.91 | 0.36      |      |  | 2.24  | 0.04      | Up   | 1.09  | 0.18  |      | CYCLIN D4;1                                                                 |         |
| Pc_TC010710 | 0.47  | 0.11  |      | 0.68  | 0.07      |      |  | -1.76 | 0.04      | Down | -0.68 | 0.17  |      | Cytokine-induced anti-apoptosis inhibitor 1,Fe-S biogenesis                 |         |
| Pc_TC010711 | 0.36  | 0.3   |      | 0.84  | 0.05      |      |  | -2.18 | 0.02      | Down | -0.84 | 0.12  |      | Cytokine-induced anti-apoptosis inhibitor 1,Fe-S biogenesis                 |         |
| Pc_TC010712 | 1.02  | 0.02  | Up   | 1.36  | 0.01      | Up   |  | -1.35 | 0.19      |      | 0.27  | 0.67  |      | NBS-LRR disease resistance protein-like                                     |         |
| Pc_TC010718 | -1.61 | 0.04  | Down | -0.51 | 0.55      |      |  | 1.3   | 0.23      |      | 0.82  | 0.27  |      | Remorin family protein                                                      |         |
| Pc_TC010730 | 0.24  | 0.72  |      | 1.36  | 0.04      | Up   |  | -5.07 | 0         | Down | -2.94 | 0     | Down | Purple acid phosphatases superfamily protein                                |         |
| Pc_TC010731 | 1.26  | 0.07  |      | 0.95  | 0.25      |      |  | -4.3  | 0.01      | Down | -1.77 | 0.08  |      | purple acid phosphatase 18                                                  |         |
| Pc_TC010738 | -0.61 | 0.18  |      | -2.48 | 7.96E-005 | Down |  | 1.58  | 0.08      |      | 0.89  | 0.12  |      | rubisco activase                                                            |         |
| Pc_TC010764 | 2.12  | 0     | Up   | 2.45  | 0         | Up   |  | 0.86  | 0.45      |      | 0.75  | 0.35  |      | hemoglobin 1                                                                |         |
| Pc_TC010770 | -0.63 | 0.1   |      | -1.62 | 0         | Down |  | 2.27  | 0.01      | Up   | 0.19  | 0.73  |      | phototropin 1                                                               |         |
| Pc_TC010790 | -0.01 | 1     |      | 0.04  | 0.97      |      |  | -2.9  | 0.02      | Down | -1.27 | 0.11  |      | Putative uncharacterized protein                                            |         |
| Pc_TC010791 | 0.15  | 0.75  |      | 0.32  | 0.56      |      |  | -3.14 | 0         | Down | -1.27 | 0.05  | Down | Putative uncharacterized protein                                            |         |
| Pc_TC010816 | -0.1  | 0.99  |      | 0.36  | 0.79      |      |  | -4.58 | 0.03      | Down | -2.88 | 0.06  |      | Putative uncharacterized protein                                            |         |
| Pc_TC010820 | -2.11 | ##### | Down | -0.85 | 0.07      |      |  | 0.08  | 0.93      |      | -1.34 | 0.01  | Down | Saposin-like aspartyl protease family protein                               |         |
| Pc_TC010823 | 0.7   | 0.33  |      | 1.42  | 0.07      |      |  | -3.21 | 0.03      | Down | -0.07 | 0.96  |      | putative,CACTA,En/Spm sub-class                                             |         |
| Pc_TC010825 | 0.27  | 0.49  |      | 0.11  | 0.83      |      |  | -2.73 | 0.01      | Down | -0.27 | 0.64  |      | vesicle-associated membrane protein 714                                     |         |
| Pc_TC010835 | -0.25 | 0.65  |      | 0     | 1         |      |  | -1.13 | 0.28      |      | -1.46 | 0.04  | Down | Expressed protein                                                           |         |
| Pc_TC010840 | 0.58  | 0.48  |      | 1.78  | 0.03      | Up   |  | -1.2  | 0.38      |      | -0.47 | 0.65  |      | Putative uncharacterized protein                                            |         |
| Pc_TC010842 | 0.79  | 0.06  |      | 1.14  | 0.03      | Up   |  | 1.53  | 0.09      |      | 1.33  | 0.02  | Up   | sodium proton exchanger,putative                                            |         |
| Pc_TC010859 | 6.84  | ##### | Up   | 0     | 0         |      |  | 7.83  | 4.98E-012 | Up   | 3.68  | ##### | Up   | Putative reverse transcriptase                                              |         |
| Pc_TC010874 | -0.86 | 0.12  |      | -1.6  | 0.02      | Down |  | -0.07 | 0.95      |      | -0.7  | 0.3   |      | Uncharacterized protein                                                     |         |
| Pc_TC010875 | -0.51 | 0.17  |      | -1.03 | 0.04      | Down |  | 0.25  | 0.78      |      | -0.38 | 0.48  |      | response regulator 9                                                        |         |
| Pc_TC010893 | -1.56 | ##### | Down | -1.58 | 0         | Down |  | 1.07  | 0.2       |      | 0.05  | 0.92  |      | tonoplast monosaccharide transporter2                                       |         |
| Pc_TC010895 | -0.24 | 0.58  |      | 0.26  | 0.62      |      |  | -1.76 | 0.07      |      | -1.77 | 0     | Down | Expressed protein                                                           |         |
| Pc_TC010898 | 0.86  | 0.04  |      | 1.29  | 0.01      | Up   |  | -1.63 | 0.1       |      | 0     | 1     |      | glutathione S-transferase TAU 18                                            |         |
| Pc_TC010905 | -1.19 | 0.04  | Down | -0.52 | 0.44      |      |  | 0.48  | 0.63      |      | 0.13  | 0.86  |      | Uncharacterized protein                                                     |         |
| Pc_TC010919 | 0.61  | 0.16  |      | 2.01  | 5.32E-005 | Up   |  | -3.69 | 0         | Down | 0.2   | 0.74  |      | Uridine diphosphate glycosyltransferase 74E2                                |         |
| Pc_TC010920 | 0.62  | 0.17  |      | 1.97  | 0         | Up   |  | -3.62 | 0         | Down | 0.63  | 0.3   |      | Uridine diphosphate glycosyltransferase 74E2                                |         |
| Pc_TC010949 | 0.42  | 0.3   |      | 0.56  | 0.26      |      |  | -2.28 | 0.02      | Down | -1.97 | 0     | Down | Uncharacterised protein family (UPF0497)                                    |         |
| Pc_TC010953 | 0.73  | 0.04  |      | 0.82  | 0.07      |      |  | -2.93 | 0         | Down | -0.75 | 0.17  |      | calmodulin like 42                                                          |         |
| Pc_TC010956 | 1.51  | ##### | Up   | 0.78  | 0.11      |      |  | 0.96  | 0.28      |      | 0.86  | 0.12  |      | Coatome,beta' subunit                                                       |         |
| Pc_TC010967 | -1.01 | 0.11  |      | -1.73 | 0.03      | Down |  | 1.84  | 0.07      |      | 0.89  | 0.19  |      | Expressed protein                                                           |         |
| Pc_TC010976 | -1.77 | 0     | Down | -2.01 | 0.01      | Down |  | 1.59  | 0.1       |      | 0.41  | 0.53  |      | myb domain protein 59                                                       | MYB     |
| Pc_TC010993 | 0.2   | 0.84  |      | 2.64  | 0         | Up   |  | -4.54 | 0.01      | Down | -0.72 | 0.48  |      | unknown protein                                                             |         |
| Pc_TC010998 | 0.62  | 0.05  |      | 0.71  | 0.08      |      |  | -2.94 | 0         | Down | -1.38 | 0.01  | Down | metallothionein 2B                                                          |         |
| Pc_TC010999 | 0.67  | 0.1   |      | 1.07  | 0.03      | Up   |  | -1.51 | 0.12      |      | -1.1  | 0.07  |      | Expressed protein                                                           |         |
| Pc_TC011003 | 0.44  | 0.37  |      | 0.56  | 0.35      |      |  | -5.17 | 5.01E-005 | Down | -2.27 | 0     | Down | Gag-pol polyprotein (Fragment)                                              |         |
| Pc_TC011011 | 0.47  | 0.4   |      | 1.48  | 0.02      | Up   |  | -0.4  | 0.71      |      | 0.69  | 0.31  |      | AUX/IAA transcriptional regulator family protein                            | AUX/IAA |
| Pc_TC011025 | 1.06  | 0.07  |      | 2.47  | 9.57E-005 | Up   |  | -2.22 | 0.06      |      | -0.64 | 0.41  |      | CHY-type/CTCOHY-type/RING-type Zinc finger protein                          |         |
| Pc_TC011026 | 0.08  | 0.78  |      | 0.58  | 0.13      |      |  | -2.59 | 0         | Down | -1.69 | 0     | Down | CHY-type/CTCOHY-type/RING-type Zinc finger protein                          |         |
| Pc_TC011032 | 0.34  | 0.31  |      | 0.34  | 0.42      |      |  | -2.24 | 0.01      | Down | -1.57 | 0     | Down | 2-oxoglutarate (2OG) and Fe(II)-dependent oxygenase superfamily protein     |         |
| Pc_TC011035 | -0.28 | 0.83  |      | -0.22 | 0.89      |      |  | -4.02 | 0.03      | Down | -3.31 | 0.02  | Down | Putative group 3 pollen allergen                                            |         |
| Pc_TC011036 | 0.26  | 0.74  |      | 0.38  | 0.66      |      |  | -5.2  | 0         | Down | -1.55 | 0.1   |      | Uncharacterized protein                                                     |         |
| Pc_TC011037 | 0.46  | 0.37  |      | 0.05  | 0.94      |      |  | -2.15 | 0.05      | Down | -0.28 | 0.68  |      | D-aminoacid aminotransferase-like PLP-dependent enzymes superfamily protein |         |
| Pc_TC011056 | -0.84 | 0.06  |      | -1.88 | 0         | Down |  | 1.15  | 0.2       |      | 0.95  | 0.09  |      | senescence-related gene 1                                                   |         |
| Pc_TC011088 | 0.39  | 0.3   |      | 1.04  | 0.02      | Up   |  | -7.14 | 6.94E-009 | Down | -3.51 | ##### | Down | DNA repair ATPase-related                                                   |         |
| Pc_TC011097 | 0.15  | 0.88  |      | 0.49  | 0.59      |      |  | 2.48  | 0.03      | Up   | 1.24  | 0.13  |      | NB-ARC domain-containing disease resistance protein                         |         |
| Pc_TC011099 | -0.07 | 0.9   |      | 1.27  | 0.03      | Up   |  | -1.45 | 0.17      |      | -0.48 | 0.47  |      | protein kinase 2B                                                           |         |
| Pc_TC011104 | -0.57 | 0.61  |      | -2.82 | 0.06      |      |  | -2.96 | 0.08      |      | -2.83 | 0.04  | Down | Mitochondrial substrate carrier family protein                              |         |

|             |       |       |      |  |       |           |      |       |           |      |       |       |      |                                                                         |      |
|-------------|-------|-------|------|--|-------|-----------|------|-------|-----------|------|-------|-------|------|-------------------------------------------------------------------------|------|
| Pc_TC011132 | 0.5   | 0.14  |      |  | 1.01  | 0.02      | Up   | -2.34 | 0.01      | Down | -0.73 | 0.17  |      | Arabidopsis Inositol phosphorylceramide synthase 1                      |      |
| Pc_TC011133 | 0.26  | 0.82  |      |  | 1.37  | 0.14      |      | 1.72  | 0.16      |      | 1.91  | 0.03  | Up   | Os01g0174200 protein                                                    |      |
| Pc_TC011136 | -0.31 | 0.63  |      |  | -1.81 | 0.02      | Down | 2.18  | 0.03      | Up   | 1.31  | 0.05  |      | Domain of unknown function (DUF1995)                                    |      |
| Pc_TC011143 | -1.29 | 0     | Down |  | -1.48 | 0.01      | Down | 1.54  | 0.08      |      | -0.06 | 0.92  |      | sulfoquinovosyldiacylglycerol 2                                         |      |
| Pc_TC011159 | -1.1  | 0.05  | Down |  | -0.58 | 0.36      |      | -0.19 | 0.85      |      | -0.51 | 0.44  |      | binding;RNA binding                                                     |      |
| Pc_TC011167 | 0.46  | 0.12  |      |  | 0.79  | 0.03      |      | -3.49 | 0         | Down | -1.81 | 0     | Down | Aluminium induced protein with YGL and LRDR motifs                      |      |
| Pc_TC011178 | -2.64 | ##### | Down |  | -1.83 | 0.01      | Down | -0.11 | 0.92      |      | -1.37 | 0.06  |      | Expressed protein                                                       |      |
| Pc_TC011187 | 1.23  | 0.29  |      |  | -0.11 | 1         |      | -0.21 | 0.97      |      | 2.58  | 0.01  | Up   | stromal ascorbate peroxidase                                            |      |
| Pc_TC011191 | -2.1  | 0     | Down |  | -0.68 | 0.36      |      | -0.73 | 0.51      |      | -2.55 | 0     | Down | OSIGBa0127D24.3 protein                                                 |      |
| Pc_TC011192 | 2.32  | 0.01  | Up   |  | 2.46  | 0.01      | Up   | 0.6   | 0.7       |      | 0.07  | 1     |      | Expressed protein                                                       |      |
| Pc_TC011201 | 0.54  | 0.18  |      |  | 1.58  | 0         | Up   | -1.51 | 0.12      |      | -0.69 | 0.25  |      | Acyl-CoA N-acyltransferases (NAT) superfamily protein                   | GNAT |
| Pc_TC011209 | 0.36  | 0.34  |      |  | 1.64  | 0         | Up   | -3.97 | 0         | Down | -1.66 | 0     | Down | Predicted protein                                                       |      |
| Pc_TC011210 | -0.08 | 0.88  |      |  | 1.23  | 0.03      | Up   | 0.19  | 0.85      |      | -0.23 | 0.72  |      | photosynthetic electron transfer D                                      |      |
| Pc_TC011214 | -0.16 | 0.78  |      |  | 0.71  | 0.25      |      | -1.53 | 0.15      |      | -2.13 | 0     | Down | NAC domain containing protein 57                                        | NAC  |
| Pc_TC011219 | -3.58 | ##### | Down |  | -3.42 | 1.89E-006 | Down | -4.97 | 4.05E-005 | Down | -4.41 | ##### | Down | Predicted protein                                                       |      |
| Pc_TC011220 | -2.48 | 0     | Down |  | -0.91 | 0.25      |      | -1.19 | 0.3       |      | -1.61 | 0.05  |      | Uncharacterized protein                                                 |      |
| Pc_TC011223 | 0.38  | 0.35  |      |  | 1.07  | 0.03      | Up   | -0.54 | 0.57      |      | -0.82 | 0.17  |      | Tetratricopeptide repeat (TPR)-like superfamily protein                 |      |
| Pc_TC011224 | 0.23  | 0.49  |      |  | 0.03  | 0.95      |      | -1.93 | 0.03      | Down | -0.87 | 0.1   |      | Uncharacterized protein                                                 |      |
| Pc_TC011226 | -0.33 | 0.69  |      |  | -1.16 | 0.22      |      | 2.22  | 0.04      | Up   | 1.66  | 0.03  | Up   | Transcript antisense to ribosomal rna protein                           |      |
| Pc_TC011227 | -3.28 | ##### | Down |  | 1.07  | 0.06      |      | -1.19 | 0.25      |      | -2.08 | 0     | Down | Os01g0182100 protein                                                    |      |
| Pc_TC011233 | 0.6   | 0.12  |      |  | 0.76  | 0.11      |      | -3.24 | 0         | Down | -2.44 | ##### | Down | unknown protein                                                         |      |
| Pc_TC011240 | -2.24 | 0.02  | Down |  | -0.15 | 0.89      |      | -0.18 | 0.9       |      | 0.7   | 0.4   |      | Expressed protein                                                       |      |
| Pc_TC011257 | 0.7   | 0.36  |      |  | 1.46  | 0.07      |      | 2.52  | 0.02      | Up   | 1.86  | 0.02  | Up   | lipid-transfer protein/seed storage 2S albumin superfamily protein      |      |
| Pc_TC011265 | 0.14  | 0.93  |      |  | -0.4  | 0.76      |      | 1     | 0.44      |      | 2.52  | 0     | Up   | DNAse I-like superfamily protein                                        |      |
| Pc_TC011267 | 0.63  | 0.04  |      |  | 1.06  | 0.01      | Up   | -1.81 | 0.04      | Down | -0.49 | 0.33  |      | amino acid permease 7                                                   |      |
| Pc_TC011295 | -0.05 | 0.94  |      |  | 0.63  | 0.3       |      | -4.87 | 0         | Down | -3.08 | ##### | Down | Adenine nucleotide alpha hydrolases-like superfamily protein            |      |
| Pc_TC011301 | 0.2   | 0.63  |      |  | 1.05  | 0.03      | Up   | -2.69 | 0.01      | Down | -1.43 | 0.02  | Down | cysteine-rich RLK (RECEPTOR-like protein kinase) 8                      |      |
| Pc_TC011306 | 0     | 0.31  |      |  | 0     | 0.36      |      | 3.57  | 0.02      | Up   | 1.53  | 0.35  |      | Peroxidase superfamily protein                                          |      |
| Pc_TC011307 | 0     | 0.64  |      |  | -0.94 | 1         |      | 3.71  | 0.04      | Up   | 2.95  | 0.08  |      | Peroxidase superfamily protein                                          |      |
| Pc_TC011308 | -0.66 | 0.05  |      |  | -1.45 | 0         | Down | 1.89  | 0.03      | Up   | 0.84  | 0.09  |      | glyceraldehyde 3-phosphate dehydrogenase A subunit                      |      |
| Pc_TC011319 | 0.6   | 0.26  |      |  | 1.27  | 0.04      | Up   | -2.54 | 0.03      | Down | -1.05 | 0.14  |      | Inositol monophosphatase family protein                                 |      |
| Pc_TC011326 | 0.83  | 0.18  |      |  | 1.43  | 0.04      | Up   | -1.83 | 0.13      |      | 0.81  | 0.28  |      | sterol carrier protein 2                                                |      |
| Pc_TC011346 | -0.2  | 0.69  |      |  | -1.34 | 0.04      | Down | -0.64 | 0.52      |      | -0.29 | 0.66  |      | plastidic GLC translocator                                              |      |
| Pc_TC011362 | 0.35  | 0.63  |      |  | 0.42  | 0.61      |      | -4.38 | 0         | Down | -2.26 | 0.02  | Down | Uncharacterized protein                                                 |      |
| Pc_TC011378 | -0.3  | 0.47  |      |  | -0.68 | 0.19      |      | 1.82  | 0.04      | Up   | 0.71  | 0.2   |      | bZIP transcription factor family protein                                | bZIP |
| Pc_TC011390 | -0.55 | 0.3   |      |  | -0.86 | 0.19      |      | 2.26  | 0.02      | Up   | 1.51  | 0.01  | Up   | unknown protein                                                         |      |
| Pc_TC011391 | 0.16  | 0.59  |      |  | 0.28  | 0.44      |      | -1.98 | 0.02      | Down | -1.11 | 0.02  | Down | autoinhibited Ca2+ -ATPase,isoform 8                                    |      |
| Pc_TC011403 | 0.44  | 0.35  |      |  | 1.91  | 0         | Up   | -4.21 | 0         | Down | -2.87 | ##### | Down | Peroxidase superfamily protein                                          |      |
| Pc_TC011413 | 0.38  | 0.31  |      |  | 0.45  | 0.34      |      | -3.08 | 0         | Down | -1.47 | 0.01  | Down | Putative lysine decarboxylase family protein                            |      |
| Pc_TC011436 | -0.33 | 0.6   |      |  | -1.11 | 0.14      |      | 2.15  | 0.03      | Up   | 0.79  | 0.25  |      | 2-oxoglutarate (2OG) and Fe(II)-dependent oxygenase superfamily protein |      |
| Pc_TC011437 | 0.54  | 0.46  |      |  | -0.22 | 0.82      |      | 0.97  | 0.39      |      | 2.03  | 0.01  | Up   | phytochrome interacting factor 4                                        | bHLH |
| Pc_TC011440 | 0.47  | 0.27  |      |  | 1.27  | 0.01      | Up   | -2.18 | 0.03      | Down | -1.09 | 0.08  |      | splicing factor Prp18 family protein                                    |      |
| Pc_TC011441 | 5.05  | ##### | Up   |  | 3.32  | 0         | Up   | 4.94  | 0         | Up   | 3.65  | 0     | Up   | Galactose oxidase/kelch repeat superfamily protein                      |      |
| Pc_TC011443 | -0.3  | 0.38  |      |  | -0.88 | 0.05      |      | 1.66  | 0.05      | Up   | 0.62  | 0.22  |      | Wound-responsive family protein                                         |      |
| Pc_TC011449 | 0.33  | 0.33  |      |  | 0.39  | 0.38      |      | -2.13 | 0.02      | Down | -1.79 | 0     | Down | unknown protein                                                         |      |
| Pc_TC011458 | 1.13  | 0.02  | Up   |  | 0.88  | 0.14      |      | -4.24 | 0         | Down | -0.39 | 0.56  |      | Expressed protein                                                       |      |
| Pc_TC011462 | 0.22  | 0.87  |      |  | -0.26 | 0.87      |      | 0.39  | 0.8       |      | 1.95  | 0.03  | Up   | Putative uncharacterized protein                                        |      |
| Pc_TC011464 | -0.84 | 0.3   |      |  | -0.19 | 0.85      |      | -0.81 | 0.51      |      | -2.05 | 0.04  | Down | LRR and NB-ARC domains-containing disease resistance protein            |      |
| Pc_TC011472 | 0.23  | 0.65  |      |  | 0.97  | 0.09      |      | -1.54 | 0.14      |      | -1.94 | 0.01  | Down | Os11g0515900 protein                                                    |      |
| Pc_TC011478 | 0.8   | 0.04  |      |  | 1.04  | 0.03      | Up   | -0.22 | 0.81      |      | 0.26  | 0.65  |      | Polynucleotidyl transferase,ribonuclease H-like superfamily protein     |      |
| Pc_TC011489 | 1.73  | 0.01  | Up   |  | 1.86  | 0.02      | Up   | 2.39  | 0.03      | Up   | 1.74  | 0.03  | Up   | Putative uncharacterized protein                                        |      |
| Pc_TC011490 | -0.23 | 0.51  |      |  | -0.73 | 0.11      |      | 1.73  | 0.04      | Up   | 0.99  | 0.05  |      | unknown protein                                                         |      |
| Pc_TC011495 | 0.85  | 0.06  |      |  | 1.93  | 0         | Up   | -0.62 | 0.53      |      | -0.76 | 0.25  |      | Expressed protein                                                       |      |
| Pc_TC011502 | 0.51  | 0.27  |      |  | 1.15  | 0.04      | Up   | -0.62 | 0.53      |      | 0.36  | 0.56  |      | GRAS family transcription factor                                        | GRAS |
| Pc_TC011503 | 0.73  | 0.09  |      |  | 1.18  | 0.03      | Up   | -1.08 | 0.27      |      | 0.21  | 0.73  |      | GRAS family transcription factor                                        | GRAS |
| Pc_TC011506 | 1.2   | 0.03  | Up   |  | 0     | 2.99E-008 |      | 2.08  | 0.04      | Up   | -0.36 | 0.63  |      | Uncharacterized protein                                                 |      |
| Pc_TC011518 | 0.47  | 0.28  |      |  | 1.09  | 0.04      | Up   | -0.75 | 0.44      |      | -1.06 | 0.1   |      | cytochrome P450,family 722,subfamily A,polypeptide 1                    | CCHC |
| Pc_TC011525 | 1.06  | 0.09  |      |  | 1.86  | 0.01      | Up   | -1.52 | 0.21      |      | 0.56  | 0.47  |      | CRT (chloroquine-resistance transporter)-like transporter 1             |      |
| Pc_TC011529 | 1.25  | 0.07  |      |  | 0     | 0         |      | -0.23 | 0.87      |      | 2.8   | 0     | Up   | myosin 1                                                                |      |
| Pc_TC011533 | -0.82 | 0.22  |      |  | -1.61 | 0.05      | Down | 0.89  | 0.4       |      | 0.37  | 0.61  |      | Uncharacterized protein                                                 |      |
| Pc_TC011561 | 1.33  | 0.01  | Up   |  | 0     | 8.32E-011 |      | 2.25  | 0.02      | Up   | 0.37  | 0.59  |      | Expressed protein                                                       |      |
| Pc_TC011570 | 0.62  | 0.03  |      |  | 0.45  | 0.23      |      | -0.97 | 0.24      |      | 1.22  | 0.01  | Up   | anthranilate synthase 2                                                 |      |



|             |       |       |      |       |           |      |       |           |      |       |       |      |                                                                           |      |
|-------------|-------|-------|------|-------|-----------|------|-------|-----------|------|-------|-------|------|---------------------------------------------------------------------------|------|
| Pc_TC011585 | 1.39  | 0.04  | Up   | 0     | 0         |      | 1.44  | 0.21      |      | 0.48  | 0.59  |      | Putative uncharacterized protein OJ1057 F01.22                            |      |
| Pc_TC011606 | -1.28 | 0.03  | Down | -1.73 | 0.01      | Down | -1.66 | 0.12      |      | -1.59 | 0.03  | Down | GTP binding Elongation factor Tu family protein                           |      |
| Pc_TC011609 | 2.15  | 0     | Up   | 0     | 0         |      | 2.23  | 0.05      | Up   | 0.73  | 0.39  |      | Expressed protein                                                         |      |
| Pc_TC011622 | 0.09  | 0.86  |      | 0.67  | 0.23      |      | -2.18 | 0.04      | Down | -0.77 | 0.22  |      | unknown protein                                                           |      |
| Pc_TC011623 | -1.13 | 0.03  | Down | -0.95 | 0.13      |      | 0.31  | 0.75      |      | -0.43 | 0.51  |      | Protein kinase superfamily protein                                        |      |
| Pc_TC011625 | 2.47  | ##### | Up   | 0     | 2.64E-005 |      | 2.51  | 0.02      | Up   | -0.01 | 1     |      | Glycine cleavage T-protein family                                         |      |
| Pc_TC011630 | -0.34 | 0.58  |      | 0.21  | 0.77      |      | 2.97  | 0         | Up   | 1.78  | 0.01  | Up   | beta-hexosaminidase 3                                                     |      |
| Pc_TC011631 | 0.52  | 0.31  |      | 1.22  | 0.04      | Up   | -0.6  | 0.56      |      | 0.27  | 0.69  |      | CSL zinc finger domain-containing protein                                 |      |
| Pc_TC011639 | 0.28  | 0.7   |      | 0.56  | 0.48      |      | 1.73  | 0.11      |      | 2.37  | 0     | Up   | high affinity K+ transporter 5                                            |      |
| Pc_TC011644 | 0.63  | 0.14  |      | 0.48  | 0.36      |      | 0.56  | 0.54      |      | 1.31  | 0.02  | Up   | Peroxidase superfamily protein                                            |      |
| Pc_TC011645 | -1.11 | 0.03  | Down | -0.82 | 0.19      |      | 0.92  | 0.34      |      | 0.39  | 0.53  |      | Putative polyprotein                                                      |      |
| Pc_TC011647 | 0.96  | 0.13  |      | 1.83  | 0.01      | Up   | 1.3   | 0.23      |      | 1.72  | 0.02  | Up   | Terpenoid cyclases/Protein prenyltransferases superfamily protein         |      |
| Pc_TC011648 | 0.28  | 0.66  |      | 1.35  | 0.04      | Up   | 1.81  | 0.08      |      | 0.75  | 0.29  |      | Terpenoid cyclases/Protein prenyltransferases superfamily protein         |      |
| Pc_TC011664 | 1.19  | 0     | Up   | 0.73  | 0.13      |      | -1.56 | 0.1       |      | -0.25 | 0.65  |      | Expressed protein                                                         |      |
| Pc_TC011673 | -0.51 | 0.57  |      | 2.32  | 0         | Up   | -2.61 | 0.07      |      | -3.08 | 0.01  | Down | Expressed protein                                                         |      |
| Pc_TC011674 | -1.66 | 0.08  |      | -0.87 | 0.38      |      | -3.82 | 0.01      | Down | -1.53 | 0.13  |      | Expressed protein                                                         |      |
| Pc_TC011683 | -0.12 | 0.79  |      | 0.09  | 0.87      |      | -1.62 | 0.11      |      | -1.26 | 0.05  | Down | Putative uncharacterized protein                                          |      |
| Pc_TC011696 | -0.33 | 0.54  |      | -1.4  | 0.04      | Down | 0.57  | 0.57      |      | 0.82  | 0.19  |      | Heavy metal transport/detoxification superfamily protein                  |      |
| Pc_TC011716 | -0.16 | 0.76  |      | 1.35  | 0.02      | Up   | -0.61 | 0.55      |      | -0.28 | 0.67  |      | ATP synthase subunit 1                                                    |      |
| Pc_TC011738 | 0.46  | 0.13  |      | 0     | 0.99      |      | -1.89 | 0.03      | Down | -1.32 | 0.01  | Down | Expressed protein                                                         |      |
| Pc_TC011742 | -0.11 | 0.79  |      | -1.82 | 0         | Down | -4.43 | 6.15E-005 | Down | -3.08 | ##### | Down | fatty acid reductase 1                                                    |      |
| Pc_TC011757 | 0.68  | 0.3   |      | 0.7   | 0.36      |      | 2.11  | 0.05      | Up   | 0.55  | 0.49  |      | Expressed protein                                                         |      |
| Pc_TC011758 | 0.3   | 0.41  |      | 0.64  | 0.16      |      | -1.82 | 0.05      | Down | -1.02 | 0.07  |      | P-loop containing nucleoside triphosphate hydrolases superfamily protein  |      |
| Pc_TC011781 | 0.16  | 0.83  |      | 1.47  | 0.04      | Up   | -1.63 | 0.18      |      | -0.09 | 0.93  |      | carboxyesterase 17                                                        |      |
| Pc_TC011793 | 0.49  | 0.76  |      | 0.21  | 0.96      |      | 2.54  | 0.06      |      | 2.61  | 0.01  | Up   | Eukaryotic aspartyl protease family protein                               |      |
| Pc_TC011805 | -2.01 | 0.02  | Down | -1.81 | 0.07      |      | 0.68  | 0.56      |      | -0.92 | 0.31  |      | Expressed protein                                                         |      |
| Pc_TC011814 | 0.69  | 0.35  |      | 0.6   | 0.48      |      | -3.96 | 0.01      | Down | -2.51 | 0.02  | Down | HSP20-like chaperones superfamily protein                                 |      |
| Pc_TC011824 | 0.68  | 0.17  |      | 1.74  | 0         | Up   | -0.96 | 0.36      |      | -0.2  | 0.77  |      | cytochrome P450, family 707, subfamily A, polypeptide 1                   |      |
| Pc_TC011830 | -1.07 | 0     | Down | -1.39 | 0         | Down | 0.5   | 0.56      |      | -0.71 | 0.19  |      | high affinity K+ transporter 5                                            |      |
| Pc_TC011831 | 1.98  | 0     | Up   | 0     | 0         |      | 1.8   | 0.12      |      | 1.48  | 0.07  |      | Phox (PX) domain-containing protein                                       |      |
| Pc_TC011840 | 1.09  | 0.02  | Up   | -7.03 | 1.84E-011 | Down | 0.62  | 0.53      |      | -0.43 | 0.52  |      | Expressed protein                                                         |      |
| Pc_TC011842 | 0.54  | 0.57  |      | -0.75 | 0.56      |      | 2.37  | 0.05      | Up   | 1.09  | 0.25  |      | Expressed protein                                                         |      |
| Pc_TC011860 | -0.11 | 0.83  |      | -0.64 | 0.29      |      | 1.49  | 0.11      |      | 1.27  | 0.03  | Up   | Acyl transferase/acyl hydrolase/lysophospholipase superfamily protein     |      |
| Pc_TC011863 | 0.39  | 0.19  |      | 0.57  | 0.13      |      | -2.1  | 0.01      | Down | -1.05 | 0.04  | Down | actin 7                                                                   |      |
| Pc_TC011865 | 2.31  | ##### | Up   | 0     | 2.52E-006 |      | 1.52  | 0.16      |      | 0.1   | 0.92  |      | profilin 5                                                                |      |
| Pc_TC011874 | -1.35 | 0.03  | Down | -1.32 | 0.07      |      | 0.05  | 0.97      |      | -0.53 | 0.46  |      | exoribonuclease 4                                                         |      |
| Pc_TC011878 | -0.82 | 0.08  |      | -1.41 | 0.02      | Down | 1.36  | 0.13      |      | 0.12  | 0.85  |      | magnesium/proton exchanger                                                |      |
| Pc_TC011879 | -2.76 | 0     | Down | -0.84 | 0.3       |      | 1.85  | 0.08      |      | 0.63  | 0.4   |      | magnesium/proton exchanger                                                |      |
| Pc_TC011891 | 1.01  | 0.04  | Up   | 1.12  | 0.06      |      | -1.12 | 0.28      |      | 0.43  | 0.5   |      | Protein of unknown function                                               |      |
| Pc_TC011917 | 1.34  | 0.1   |      | 1.26  | 0.18      |      | 1.72  | 0.16      |      | 1.83  | 0.04  | Up   | acyl carrier protein 4                                                    |      |
| Pc_TC011923 | 0.18  | 0.84  |      | 1.82  | 0.02      | Up   | 0     | 0         |      | -3.11 | 0.01  | Down | Expressed protein                                                         |      |
| Pc_TC011939 | 0.61  | 0.18  |      | 1.11  | 0.04      | Up   | -1.15 | 0.25      |      | 0.65  | 0.28  |      | NAD(P)-binding Rossmann-fold superfamily protein                          |      |
| Pc_TC011942 | 3.32  | ##### | Up   | 0     | 0.01      |      | 2.88  | 0.02      | Up   | 1.33  | 0.16  |      | Expressed protein                                                         |      |
| Pc_TC011957 | -0.29 | 0.55  |      | -1.89 | 0         | Down | 0.76  | 0.42      |      | 1.06  | 0.07  |      | receptor lectin kinase                                                    |      |
| Pc_TC011961 | 0.56  | 0.06  |      | 0.82  | 0.03      |      | -3.99 | 1.88E-005 | Down | -1.96 | 0     | Down | ABRE binding factor 4                                                     | bZIP |
| Pc_TC011972 | 0.34  | 0.47  |      | 0.93  | 0.1       |      | -2.51 | 0.02      | Down | -1.37 | 0.04  | Down | Calcium-binding EF-hand family protein                                    |      |
| Pc_TC011977 | -0.77 | 0.07  |      | -1.43 | 0.01      | Down | 1.47  | 0.1       |      | 0.91  | 0.1   |      | Kinase interacting (KIP1-like) family protein                             |      |
| Pc_TC011982 | 0.82  | 0.19  |      | 1.87  | 0.01      | Up   | -2.06 | 0.09      |      | -1.06 | 0.2   |      | Late embryogenesis abundant (LEA) hydroxyproline-rich glycoprotein family |      |
| Pc_TC011983 | 0.78  | 0.11  |      | 0.15  | 0.82      |      | 2.35  | 0.01      | Up   | 2.67  | ##### | Up   | serine carboxypeptidase-like 34                                           |      |
| Pc_TC012022 | -1.69 | 0.04  | Down | -1.28 | 0.17      |      | 0.58  | 0.62      |      | 0.32  | 0.7   |      | Uncharacterized protein                                                   |      |
| Pc_TC012038 | 0.62  | 0.22  |      | 1.85  | 0         | Up   | -2.27 | 0.04      | Down | -1.63 | 0.02  | Down | unknown protein                                                           |      |
| Pc_TC012041 | -0.14 | 0.74  |      | -1.06 | 0.06      |      | 1.98  | 0.03      | Up   | 0.93  | 0.1   |      | Expressed protein                                                         |      |
| Pc_TC012052 | -0.1  | 0.84  |      | -0.08 | 0.9       |      | 2.07  | 0.03      | Up   | 0.53  | 0.39  |      | early-responsive to dehydration stress protein (ERD4)                     |      |
| Pc_TC012053 | -0.49 | 0.53  |      | 0.28  | 0.75      |      | -3.11 | 0.02      | Down | -0.91 | 0.31  |      | FAD binding domain containing protein, expressed                          |      |
| Pc_TC012064 | -0.77 | 0.02  |      | -2.09 | 3.63E-006 | Down | 2.04  | 0.02      | Up   | 2.39  | ##### | Up   | Peroxidase superfamily protein                                            |      |
| Pc_TC012068 | -1.74 | 0     | Down | -0.6  | 0.37      |      | 1.9   | 0.05      |      | 0.93  | 0.15  |      | Tetratricopeptide repeat (TPR)-like superfamily protein                   |      |
| Pc_TC012076 | -0.53 | 0.29  |      | -1.47 | 0.02      | Down | 1.19  | 0.21      |      | 0.75  | 0.22  |      | unknown protein                                                           |      |
| Pc_TC012077 | -0.39 | 0.77  |      | -0.2  | 0.92      |      | 2.51  | 0.04      | Up   | 1.58  | 0.09  |      | Heavy metal transport/detoxification superfamily protein                  |      |
| Pc_TC012090 | 0.28  | 0.55  |      | 0     | 7.76E-015 |      | -0.55 | 0.58      |      | -2.29 | 0     | Down | Putative non-LTR retroelement reverse transcriptase                       |      |
| Pc_TC012102 | -0.94 | 0.03  |      | -0.84 | 0.12      |      | 1.18  | 0.19      |      | -1.68 | 0.01  | Down | Uncharacterized protein                                                   |      |
| Pc_TC012107 | -1.9  | 0.02  | Down | -2.02 | 0.04      | Down | 2.06  | 0.06      |      | -0.15 | 0.88  |      | nodulin MtN21 /EamA-like transporter family protein                       |      |
| Pc_TC012115 | -2.54 | ##### | Down | -0.41 | 0.46      |      | 0.15  | 0.87      |      | 0.31  | 0.59  |      | Mitochondrial substrate carrier family protein                            |      |

|             |       |       |      |           |           |      |       |           |      |       |       |      |                                                                                   |       |
|-------------|-------|-------|------|-----------|-----------|------|-------|-----------|------|-------|-------|------|-----------------------------------------------------------------------------------|-------|
| Pc_TC012117 | -1.51 | 0     | Down | -1.28     | 0.04      | Down | 1.65  | 0.08      |      | 0.94  | 0.12  |      | S-adenosyl-L-methionine-dependent methyltransferases superfamily protein          |       |
| Pc_TC012140 | -0.06 | 0.87  |      | -0.61     | 0.17      |      | 0.71  | 0.4       |      | 1.07  | 0.03  | Up   | Auxin efflux carrier family protein                                               |       |
| Pc_TC012144 | 1.07  | 0     | Up   | 1.22      | 0.01      | Up   | -1.63 | 0.08      |      | 1.42  | 0.01  | Up   | Aldolase-type TIM barrel family protein                                           |       |
| Pc_TC012157 | -1.78 | 0.03  | Down | -0.92     | 0.28      |      | 1.74  | 0.1       |      | 0.67  | 0.38  |      | fatty acid hydroxylase 1                                                          |       |
| Pc_TC012163 | 0.44  | 0.35  |      | 0.83      | 0.15      |      | -2.31 | 0.03      | Down | -1.42 | 0.04  | Down | Ribosomal protein L34e superfamily protein                                        |       |
| Pc_TC012179 | 0.76  | 0.08  |      | -0.28     | 0.63      |      | 3.28  | 0         | Up   | 2.39  | ##### | Up   | Expressed protein                                                                 |       |
| Pc_TC012194 | -0.31 | 0.4   |      | -0.27     | 0.56      |      | -2.07 | 0.03      | Down | -1.16 | 0.04  | Down | ethylene-forming enzyme                                                           |       |
| Pc_TC012204 | 0.45  | 0.29  |      | 0.65      | 0.21      |      | -2.46 | 0.02      | Down | -0.52 | 0.39  |      | Expressed protein                                                                 |       |
| Pc_TC012214 | 0.15  | 0.66  |      | -0.73     | 0.09      |      | 0.89  | 0.29      |      | 1.72  | 0     | Up   | Leucine-rich repeat protein kinase family protein                                 |       |
| Pc_TC012224 | -0.05 | 0.89  |      | -1.06     | 0.02      | Down | 0.74  | 0.38      |      | 0.54  | 0.29  |      | B-box zinc finger family protein                                                  |       |
| Pc_TC012227 | -0.83 | 0.27  |      | 0.01      | 1         |      | -3.69 | 0.01      | Down | -0.13 | 0.89  |      | DHHC-type zinc finger family protein                                              |       |
| Pc_TC012230 | 1.11  | 0.06  |      | 1.49      | 0.03      | Up   | -1.45 | 0.22      |      | 0.12  | 0.89  |      | Putative uncharacterized protein                                                  |       |
| Pc_TC012245 | 0.12  | 0.72  |      | 0.28      | 0.5       |      | -2.22 | 0.01      | Down | -0.99 | 0.06  |      | Squamosa promoter-binding protein-like (SBP domain) transcription factor family p | SBP   |
| Pc_TC012258 | -0.22 | 0.58  |      | -0.62     | 0.22      |      | 1.46  | 0.09      |      | 1.17  | 0.03  | Up   | methyltransferases                                                                |       |
| Pc_TC012265 | 1.72  | 0.02  | Up   | 0         | 0         |      | 3.09  | 0.01      | Up   | 2.08  | 0.01  | Up   | Fatty acid desaturase family protein                                              |       |
| Pc_TC012269 | 0.35  | 0.46  |      | 0.94      | 0.09      |      | -2.4  | 0.02      | Down | -0.27 | 0.68  |      | RING-H2 finger B1A                                                                |       |
| Pc_TC012280 | 1.98  | ##### | Up   | 5.05E-009 |           |      | 2.28  | 0.02      | Up   | 0.34  | 0.63  |      | Expressed protein                                                                 |       |
| Pc_TC012287 | 0.76  | 0.21  |      | 0.36      | 0.63      |      | 3.05  | 0         | Up   | 2.22  | 0     | Up   | Gibberellin-regulated family protein                                              |       |
| Pc_TC012290 | 0.24  | 0.4   |      | 1.44      | 0         | Up   | -1.69 | 0.04      | Down | -1.5  | 0     | Down | photosystem II reaction center protein A                                          |       |
| Pc_TC012295 | -0.28 | 0.69  |      | -1.05     | 0.2       |      | 2.22  | 0.03      | Up   | 1.28  | 0.07  |      | Ornithine decarboxylase antizyme                                                  |       |
| Pc_TC012302 | 1.91  | 0     | Up   | 0         | 1.41E-007 |      | 2.21  | 0.03      | Up   | 0.52  | 0.48  |      | Expressed protein                                                                 |       |
| Pc_TC012306 | 0.11  | 0.86  |      | 0.22      | 0.75      |      | -2.68 | 0.02      | Down | -2.1  | 0.01  | Down | Haloacid dehalogenase-like hydrolase (HAD) superfamily protein                    |       |
| Pc_TC012322 | -0.45 | 0.44  |      | -1.89     | 0.01      | Down | -0.28 | 0.79      |      | -0.26 | 0.71  |      | mitogen-activated protein kinase 16                                               |       |
| Pc_TC012330 | -0.08 | 0.88  |      | -0.33     | 0.59      |      | 1.72  | 0.07      |      | 1.18  | 0.05  | Up   | NAD(P)-binding Rossmann-fold superfamily protein                                  |       |
| Pc_TC012332 | -1.12 | 0.02  | Down | -0.74     | 0.2       |      | 2.27  | 0.01      | Up   | 0.82  | 0.16  |      | Chalcone-flavanone isomerase family protein                                       |       |
| Pc_TC012333 | 2.28  | ##### | Up   | 1.37      | 0.01      | Up   | -0.88 | 0.36      |      | 0.06  | 0.92  |      | ethylene induced calmodulin binding protein                                       | CAMTA |
| Pc_TC012341 | 0.49  | 0.49  |      | 1.14      | 0.13      |      | -1.83 | 0.15      |      | -2.23 | 0.02  | Down | Os01g0680600 protein                                                              |       |
| Pc_TC012349 | 0.56  | 0.82  |      | 1.54      | 0.32      |      | 1.99  | 0.23      |      | 2.59  | 0.03  | Up   | TTF-type zinc finger protein with HAT dimerisation domain                         |       |
| Pc_TC012356 | 0.62  | 0.04  |      | 0.67      | 0.08      |      | -1.99 | 0.02      | Down | -0.53 | 0.28  |      | unknown protein                                                                   |       |
| Pc_TC012369 | 0.04  | 0.95  |      | 1.13      | 0.04      | Up   | -1.77 | 0.09      |      | 0.39  | 0.53  |      | Putative uncharacterized protein                                                  |       |
| Pc_TC012374 | -0.71 | 0.56  |      | -0.73     | 0.58      |      | 2.46  | 0.04      | Up   | 1.68  | 0.07  |      | exostosin family protein                                                          |       |
| Pc_TC012383 | 0.41  | 0.18  |      | 0.82      | 0.03      |      | -2.94 | 0         | Down | -1.27 | 0.01  | Down | sulfate transporter 3;1                                                           |       |
| Pc_TC012392 | -0.54 | 0.1   |      | -0.73     | 0.09      |      | 0.71  | 0.39      |      | -1.39 | 0.01  | Down | PLC-like phosphodiesterases superfamily protein                                   |       |
| Pc_TC012431 | 3.57  | ##### | Up   | 0         | 0.03      |      | 2.5   | 0.05      |      | -0.62 | 0.68  |      | PDI-like 2-3                                                                      |       |
| Pc_TC012436 | 0.2   | 0.61  |      | 0.35      | 0.48      |      | -2.95 | 0         | Down | -1.64 | 0.01  | Down | LIRHL1-like 2                                                                     | bHLH  |
| Pc_TC012451 | 0.03  | 1     |      | -0.04     | 1         |      | -5.4  | 0.01      | Down | -1.11 | 0.29  |      | Expressed protein                                                                 |       |
| Pc_TC012455 | -4.51 | 0.01  | Down | -0.07     | 1         |      | -1.76 | 0.24      |      | -1.05 | 0.36  |      | Putative uncharacterized protein                                                  |       |
| Pc_TC012464 | -2.03 | 0     | Down | -3.15     | 2.71E-005 | Down | -0.24 | 0.81      |      | -0.64 | 0.34  |      | Seven transmembrane MLO family protein                                            |       |
| Pc_TC012470 | 0.27  | 0.42  |      | 0.36      | 0.4       |      | -1.65 | 0.06      |      | -1.41 | 0.01  | Down | RNA polymerase III RPC4                                                           |       |
| Pc_TC012472 | 0.16  | 0.83  |      | 1.53      | 0.03      | Up   | -4.26 | 0         | Down | -3.29 | 0     | Down | Uncharacterized protein                                                           |       |
| Pc_TC012479 | 0.33  | 0.29  |      | -0.3      | 0.46      |      | 0.21  | 0.8       |      | 1.04  | 0.04  | Up   | Leucine-rich repeat transmembrane protein kinase                                  |       |
| Pc_TC012480 | 0.31  | 0.52  |      | 0.48      | 0.42      |      | -3.55 | 0         | Down | -0.95 | 0.15  |      | Uncharacterized protein                                                           |       |
| Pc_TC012484 | 0.49  | 0.35  |      | 1.65      | 0         | Up   | -4.85 | 0         | Down | -1.86 | 0.01  | Down | cytokinin oxidase 5                                                               |       |
| Pc_TC012487 | -0.19 | 0.81  |      | 1.48      | 0.04      | Up   | -2.41 | 0.06      |      | -0.76 | 0.37  |      | protein,putative,unclassified                                                     |       |
| Pc_TC012491 | -2.35 | 0.04  | Down | -0.79     | 0.49      |      | 0.14  | 0.94      |      | -0.27 | 0.82  |      | Expressed protein                                                                 |       |
| Pc_TC012497 | -0.63 | 0.38  |      | -1.65     | 0.06      |      | 3.13  | 0         | Up   | 1.39  | 0.06  |      | leucoanthocyanidin dioxygenase                                                    |       |
| Pc_TC012499 | 3.88  | ##### | Up   | -7.27     | 9.23E-020 | Down | 3.96  | 1.61E-005 | Up   | 1.64  | 0     | Up   | Expressed protein                                                                 |       |
| Pc_TC012506 | -0.01 | 0.99  |      | 1.72      | 0.01      | Up   | -1.4  | 0.2       |      | -0.42 | 0.57  |      | lysine-ketoglutarate reductase/saccharopine dehydrogenase bifunctional enzyme     |       |
| Pc_TC012507 | 0.06  | 0.9   |      | -0.49     | 0.4       |      | -0.45 | 0.64      |      | -1.31 | 0.04  | Down | Acid phosphatase/vanadium-dependent haloperoxidase-related protein                |       |
| Pc_TC012508 | 0.54  | 0.22  |      | 0.7       | 0.2       |      | -2.09 | 0.04      | Down | -0.61 | 0.33  |      | vacuolar ATPase subunit F family protein                                          |       |
| Pc_TC012512 | -0.26 | 0.71  |      | -0.93     | 0.26      |      | -1.1  | 0.34      |      | -2.08 | 0.02  | Down | unknown protein                                                                   |       |
| Pc_TC012523 | 0.34  | 0.3   |      | 1.03      | 0.01      | Up   | -2.4  | 0.01      | Down | -1.63 | 0     | Down | Homeodomain-like superfamily protein                                              | MYB   |
| Pc_TC012526 | 0.22  | 0.83  |      | 0.66      | 0.49      |      | 0.04  | 1         |      | 1.76  | 0.04  | Up   | cytochrome P450, family 76, subfamily C, polypeptide 2                            |       |
| Pc_TC012552 | -0.84 | 0.03  |      | -2.2      | 3.55E-005 | Down | 1.28  | 0.14      |      | 1     | 0.06  |      | senescence-related gene 1                                                         |       |
| Pc_TC012555 | 1.13  | 0     | Up   | 0.66      | 0.15      |      | 1.89  | 0.03      | Up   | 1.54  | 0     | Up   | Protein of unknown function (duplicated DUF1399)                                  |       |
| Pc_TC012560 | 0.09  | 0.78  |      | 0.23      | 0.56      |      | -1.36 | 0.11      |      | -1.27 | 0.01  | Down | microtubule-associated proteins 70-2                                              |       |
| Pc_TC012568 | 0.6   | 0.3   |      | 1.4       | 0.03      | Up   | -1.48 | 0.19      |      | -0.42 | 0.57  |      | Putative uncharacterized protein                                                  |       |
| Pc_TC012576 | 0.51  | 0.08  |      | 1.06      | 0         | Up   | -2.48 | 0         | Down | -1.52 | 0     | Down | Bowman-Birk serine protease inhibitor family protein, expressed                   |       |
| Pc_TC012579 | 0.73  | 0.05  |      | 1.27      | 0.01      | Up   | -6.69 | 3.27E-008 | Down | -2.76 | ##### | Down | PEBP (phosphatidylethanolamine-binding protein) family protein                    |       |
| Pc_TC012582 | 0.62  | 0.14  |      | 0.96      | 0.06      |      | -4.18 | 0         | Down | -2.75 | ##### | Down | Protein of unknown function (DUF789)                                              |       |
| Pc_TC012583 | -2.08 | 0.02  | Down | -4.21     | 0         | Down | 0.25  | 0.84      |      | -1.33 | 0.14  |      | Prolyl oligopeptidase family protein                                              |       |
| Pc_TC012587 | -1.37 | 0.18  |      | -1.04     | 0.35      |      | 3.91  | 0         | Up   | 2.19  | 0.01  | Up   | lipid-transfer protein/seed storage 2S albumin superfamily protein                |       |

|             |       |       |      |       |           |      |       |           |      |       |       |      |                                                                           |             |
|-------------|-------|-------|------|-------|-----------|------|-------|-----------|------|-------|-------|------|---------------------------------------------------------------------------|-------------|
| Pc_TC012589 | 0.21  | 0.52  |      | 0.41  | 0.34      |      | -2.96 | 0         | Down | -1.67 | 0     | Down | Translation initiation factor SUI1 family protein                         |             |
| Pc_TC012609 | -0.41 | 0.43  |      | -1.54 | 0.02      | Down | 0.43  | 0.66      |      | 0.08  | 0.91  |      | Uncharacterized protein                                                   |             |
| Pc_TC012613 | -5.65 | ##### | Down | -1.86 | 0.06      |      | 1.22  | 0.27      |      | 0.03  | 1     |      | Homeodomain-like transcriptional regulator                                | HB          |
| Pc_TC012619 | 0.77  | 0.08  |      | 1.82  | 0         | Up   | -3.17 | 0         | Down | -1.31 | 0.04  | Down | mitogen-activated protein kinase kinase kinase 16                         |             |
| Pc_TC012625 | -1.75 | 0.07  |      | -5.23 | 0         | Down | -0.53 | 0.68      |      | -0.37 | 0.7   |      | Predicted eukaryotic LigT                                                 |             |
| Pc_TC012640 | 0.77  | 0.06  |      | 0.75  | 0.15      |      | -2.66 | 0.01      | Down | -1.13 | 0.07  |      | Protein of unknown function,DUF584                                        |             |
| Pc_TC012650 | 0.08  | 0.85  |      | 0.05  | 0.92      |      | -3.4  | 0         | Down | -1.97 | 0     | Down | homeobox from Arabidopsis thaliana                                        | HB          |
| Pc_TC012660 | 0.12  | 0.71  |      | 0.57  | 0.16      |      | -2.85 | 0         | Down | -1.77 | 0     | Down | heat-shock protein 70T-2                                                  |             |
| Pc_TC012661 | 0.45  | 0.53  |      | 1.07  | 0.16      |      | -2.96 | 0.03      | Down | -1.76 | 0.06  |      | Expressed protein                                                         |             |
| Pc_TC012667 | 0.18  | 0.69  |      | 0.43  | 0.43      |      | -2.45 | 0.02      | Down | -1.79 | 0.01  | Down | Ribonuclease T2 family protein                                            |             |
| Pc_TC012668 | 3.74  | 0     | Up   | 0     | 0.48      |      | 3.67  | 0.02      | Up   | 3.25  | 0.02  | Up   | Expressed protein                                                         |             |
| Pc_TC012678 | 0.58  | 0.16  |      | 0.94  | 0.06      |      | -3.63 | 0         | Down | -2.38 | 0     | Down | Duplicated homeodomain-like superfamily protein                           | MYB-related |
| Pc_TC012691 | 4.25  | 0.01  | Up   | 0     | 1         |      | 2.83  | 0.32      |      | 2.95  | 0.22  |      | beta glucosidase 42                                                       |             |
| Pc_TC012698 | -1.36 | 0.06  |      | -2.77 | 0         | Down | 1.67  | 0.11      |      | 0.85  | 0.24  |      | Expressed protein                                                         |             |
| Pc_TC012700 | 0.71  | 0.03  |      | 1.62  | 7.07E-005 | Up   | -1.55 | 0.08      |      | 0.15  | 0.76  |      | Major facilitator superfamily protein                                     |             |
| Pc_TC012702 | -0.8  | 0.04  |      | -1.06 | 0.03      | Down | 1.1   | 0.2       |      | 0.32  | 0.55  |      | chloroplast import apparatus 2                                            |             |
| Pc_TC012717 | 1.43  | 0.03  | Up   | 1.34  | 0.09      |      | -2.15 | 0.11      |      | -1.66 | 0.09  |      | alpha/beta-Hydrolases superfamily protein                                 |             |
| Pc_TC012720 | 0.35  | 0.31  |      | 0.71  | 0.1       |      | -1.66 | 0.06      |      | -1.22 | 0.02  | Down | Protein of unknown function (DUF3537)                                     |             |
| Pc_TC012730 | 1.25  | 0.04  | Up   | -0.24 | 0.77      |      | 1.31  | 0.22      |      | 3.05  | ##### | Up   | O-methyltransferase family protein                                        |             |
| Pc_TC012737 | 0.27  | 0.67  |      | 0.44  | 0.54      |      | -2.94 | 0.02      | Down | -1.53 | 0.06  |      | Putative mudrA protein-maize transposon MuDR                              |             |
| Pc_TC012740 | -0.32 | 0.35  |      | -1.02 | 0.02      | Down | 1.67  | 0.05      | Up   | 0.94  | 0.06  |      | catalytics                                                                |             |
| Pc_TC012748 | 0.65  | 0.27  |      | 1.23  | 0.07      |      | -3.08 | 0.01      | Down | -0.58 | 0.45  |      | Heavy metal transport/detoxification superfamily protein                  |             |
| Pc_TC012751 | 2.66  | ##### | Up   | 0     | 0         |      | 2.03  | 0.08      |      | 0.35  | 0.72  |      | OSJNBa0019J05.12 protein                                                  |             |
| Pc_TC012755 | 3.11  | ##### | Up   | 0     | 6.30E-005 |      | 2.33  | 0.03      | Up   | 1.1   | 0.17  |      | MSF1-like family protein                                                  |             |
| Pc_TC012756 | -1.83 | 0.02  | Down | -1.31 | 0.13      |      | 0.49  | 0.66      |      | 0.01  | 1     |      | RAB GTPase homolog B1C                                                    |             |
| Pc_TC012758 | 0.71  | 0.13  |      | 0.96  | 0.09      |      | -3.08 | 0.01      | Down | -2.34 | 0     | Down | Protein of unknown function (DUF 3339)                                    |             |
| Pc_TC012784 | -0.12 | 0.86  |      | 0.3   | 0.67      |      | -3.07 | 0.01      | Down | -3.17 | 0     | Down | Quinone reductase family protein                                          |             |
| Pc_TC012791 | 0.19  | 0.67  |      | -0.28 | 0.63      |      | 0.83  | 0.37      |      | 1.19  | 0.04  | Up   | NAD(P)-linked oxidoreductase superfamily protein                          |             |
| Pc_TC012801 | 2.62  | ##### | Up   | 0     | 0         |      | 2.31  | 0.04      | Up   | 0.88  | 0.32  |      | B-cell receptor-associated protein 31-like                                |             |
| Pc_TC012802 | -1.32 | 0.06  |      | 0.48  | 0.5       |      | -2.14 | 0.07      |      | -4.02 | ##### | Down | Uncharacterized protein                                                   |             |
| Pc_TC012803 | 0.34  | 0.48  |      | 0.27  | 0.66      |      | -2.31 | 0.03      | Down | -1.61 | 0.02  | Down | UniRef90 Q7Y0D4                                                           |             |
| Pc_TC012815 | 0.74  | 0.02  |      | 1.3   | 0         | Up   | -3.64 | 0         | Down | -1.02 | 0.05  |      | Caleosin-related family protein                                           |             |
| Pc_TC012818 | 1.42  | 0.03  | Up   | 0     | 1.74E-005 |      | 2.86  | 0.01      | Up   | 0.56  | 0.49  |      | phytoene desaturation 1                                                   |             |
| Pc_TC012819 | 0.78  | 0.01  |      | 1.36  | 0         | Up   | -1.24 | 0.14      |      | -0.18 | 0.71  |      | heat shock cognate protein 70-1                                           |             |
| Pc_TC012820 | -0.01 | 0.98  |      | -0.52 | 0.21      |      | 0.66  | 0.43      |      | 1.21  | 0.01  | Up   | Auxin efflux carrier family protein                                       |             |
| Pc_TC012826 | 1.85  | 0     | Up   | 0     | 3.51E-005 |      | 1.87  | 0.09      |      | 1.79  | 0.02  | Up   | Glucose-methanol-choline (GMC) oxidoreductase family protein              |             |
| Pc_TC012837 | -1.76 | 0     | Down | -0.59 | 0.37      |      | 0.94  | 0.34      |      | 0.91  | 0.15  |      | P-loop containing nucleoside triphosphate hydrolases superfamily protein  |             |
| Pc_TC012839 | 1.34  | 0.03  | Up   | 0     | 8.90E-006 |      | 1.14  | 0.3       |      | -0.42 | 0.62  |      | Expressed protein                                                         |             |
| Pc_TC012840 | 0.75  | 0.14  |      | 0.65  | 0.3       |      | -2.5  | 0.02      | Down | -0.93 | 0.18  |      | RING/U-box superfamily protein                                            |             |
| Pc_TC012849 | 0.18  | 0.69  |      | 0.68  | 0.22      |      | -2.13 | 0.04      | Down | -1.09 | 0.09  |      | Calcium-binding EF-hand family protein                                    |             |
| Pc_TC012851 | 1.4   | 0.05  | Up   | 0     | 0         |      | 1.49  | 0.19      |      | -0.1  | 0.94  |      | Proline rich protein                                                      |             |
| Pc_TC012853 | 0.47  | 0.22  |      | -0.1  | 0.84      |      | 0.68  | 0.45      |      | 1.16  | 0.03  | Up   | 2-isopropylmalate synthase 1                                              |             |
| Pc_TC012860 | 0.71  | 0.06  |      | 1.36  | 0         | Up   | -4.98 | 6.78E-006 | Down | -3.24 | ##### | Down | UniRef100                                                                 |             |
| Pc_TC012861 | 0     | 1     |      | 0.23  | 0.71      |      | -1.63 | 0.12      |      | -1.57 | 0.03  | Down | LRR and NB-ARC domains-containing disease resistance protein              |             |
| Pc_TC012863 | 1.28  | 0.01  | Up   | 1.5   | 0.01      | Up   | -0.3  | 0.77      |      | 0.93  | 0.14  |      | Transmembrane amino acid transporter family protein                       |             |
| Pc_TC012868 | 1.28  | 0.05  | Up   | 2.07  | 0         | Up   | 0     | 0         |      | -1.27 | 0.17  |      | Expressed protein                                                         |             |
| Pc_TC012879 | 0.81  | 0.01  |      | 0.7   | 0.09      |      | -2.24 | 0.01      | Down | 0.29  | 0.56  |      | Putative uncharacterized protein                                          |             |
| Pc_TC012889 | 0.4   | 0.71  |      | 0.82  | 0.43      |      | -3.82 | 0.04      | Down | -1.89 | 0.14  |      | Expressed protein                                                         |             |
| Pc_TC012904 | 0.73  | 0.1   |      | 1.38  | 0.01      | Up   | 0.29  | 0.76      |      | 0.16  | 0.79  |      | 1-cysteine peroxiredoxin 1                                                |             |
| Pc_TC012906 | 0.82  | 0.26  |      | -5.26 | 0         | Down | 2.31  | 0.04      | Up   | -0.94 | 0.33  |      | GTP binding Elongation factor Tu family protein                           |             |
| Pc_TC012908 | 0.18  | 0.55  |      | 0.18  | 0.65      |      | -2.19 | 0.01      | Down | -1.17 | 0.02  | Down | CTP synthase family protein                                               |             |
| Pc_TC012909 | 0.49  | 0.25  |      | 1.21  | 0.02      | Up   | -0.45 | 0.64      |      | -0.05 | 0.94  |      | ATPase,F0/V0 complex,subunit C protein                                    |             |
| Pc_TC012917 | -0.13 | 0.84  |      | 0.17  | 0.8       |      | 2.64  | 0.01      | Up   | 1.61  | 0.01  | Up   | Late embryogenesis abundant (LEA) hydroxyproline-rich glycoprotein family |             |
| Pc_TC012925 | 0.43  | 0.31  |      | 1.09  | 0.03      | Up   | -2.19 | 0.03      | Down | -1.39 | 0.03  | Down | Bax inhibitor-1 family protein                                            |             |
| Pc_TC012927 | 2.93  | ##### | Up   | 2.18  | 1.34E-005 | Up   | 1.04  | 0.26      |      | 1.32  | 0.02  | Up   | beta-galactosidase 8                                                      |             |
| Pc_TC012933 | -0.95 | 0.26  |      | 0.99  | 0.22      |      | -5.99 | 0         | Down | -4.87 | 0     | Down | Expressed protein                                                         |             |
| Pc_TC012939 | 0.28  | 0.47  |      | 0.5   | 0.29      |      | -2.01 | 0.04      | Down | -0.67 | 0.23  |      | RING/U-box superfamily protein                                            |             |
| Pc_TC012941 | 0.61  | 0.06  |      | 0.59  | 0.16      |      | -2.16 | 0.02      | Down | -0.45 | 0.38  |      | Major facilitator superfamily protein                                     |             |
| Pc_TC012944 | 0.02  | 1     |      | 1.94  | 0.02      | Up   | -4.14 | 0.02      | Down | -1.7  | 0.15  |      | Expressed protein                                                         |             |
| Pc_TC012952 | 0.2   | 0.87  |      | 1.38  | 0.14      |      | 2.47  | 0.04      | Up   | 1.84  | 0.04  | Up   | Expressed protein                                                         |             |
| Pc_TC012954 | -0.36 | 0.35  |      | 1.44  | 0         | Up   | -0.68 | 0.45      |      | -0.54 | 0.33  |      | Expressed protein                                                         |             |
| Pc_TC012972 | 2.08  | 0.01  | Up   | 0     | 0.01      |      | 2.1   | 0.09      |      | 0.31  | 0.81  |      | Putative uncharacterized protein P0700F06.29                              |             |

|             |       |       |      |       |           |      |       |           |      |       |       |      |                                                                          |      |
|-------------|-------|-------|------|-------|-----------|------|-------|-----------|------|-------|-------|------|--------------------------------------------------------------------------|------|
| Pc_TC012975 | -0.41 | 0.29  |      | 0.13  | 0.78      |      | 1.9   | 0.03      | Up   | 0.86  | 0.11  |      | ATP binding microtubule motor family protein                             |      |
| Pc_TC012977 | 0     | 0.01  |      | -1.94 | 0.21      |      | 4.69  | 8.30E-005 | Up   | 0     | 0.01  |      | Uncharacterized protein                                                  |      |
| Pc_TC012978 | -1.6  | 0.01  | Down | -2.71 | 0         | Down | 1.42  | 0.16      |      | 0.83  | 0.21  |      | lectin protein kinase family protein                                     |      |
| Pc_TC012979 | -1.18 | 0.05  | Down | -0.53 | 0.44      |      | -0.08 | 0.94      |      | -1.45 | 0.05  | Down | cysteine-rich RLK (RECEPTOR-like protein kinase) 8                       |      |
| Pc_TC012981 | -0.24 | 1     |      | -1.26 | 0.7       |      | 2.96  | 0.05      | Up   | 2.39  | 0.06  |      | Expressed protein                                                        |      |
| Pc_TC012997 | -1.85 | 0     | Down | -0.45 | 0.47      |      | -1.55 | 0.14      |      | -1.67 | 0.02  | Down | pseudo-response regulator 7                                              |      |
| Pc_TC013000 | 0.16  | 0.93  |      | 2     | 0.03      | Up   | 0     | 0.01      |      | -0.3  | 0.84  |      | Endonuclease-reverse transcriptase                                       |      |
| Pc_TC013001 | 2.06  | 0.01  | Up   | 0     | 0.02      |      | 1.69  | 0.19      |      | 0.58  | 0.62  |      | Expressed protein                                                        |      |
| Pc_TC013028 | -1.67 | 0.01  | Down | -1.81 | 0.01      | Down | 3.27  | 0         | Up   | 1.85  | 0     | Up   | O-methyltransferase family protein                                       |      |
| Pc_TC013030 | 1.08  | 0.77  |      | 0     | 0.67      |      | 3.75  | 0.04      | Up   | 2.71  | 0.12  |      | Expressed protein                                                        |      |
| Pc_TC013051 | -1.74 | 0.03  | Down | -2.34 | 0.01      | Down | 1.43  | 0.18      |      | -0.78 | 0.35  |      | Putative uncharacterized protein                                         |      |
| Pc_TC013060 | -0.04 | 0.96  |      | -0.39 | 0.6       |      | 2.32  | 0.02      | Up   | 1.19  | 0.08  |      | Glycosyl hydrolase superfamily protein                                   |      |
| Pc_TC013065 | -0.32 | 0.78  |      | -0.5  | 0.68      |      | 2.52  | 0.03      | Up   | 1.07  | 0.24  |      | transcription regulators                                                 |      |
| Pc_TC013075 | 2.34  | 0.05  | Up   | 2.95  | 0.01      | Up   | 2.85  | 0.06      |      | 1.89  | 0.17  |      | Expressed protein                                                        |      |
| Pc_TC013087 | 0.4   | 0.35  |      | 1     | 0.05      |      | -2.02 | 0.04      | Down | -0.56 | 0.35  |      | unknown protein                                                          |      |
| Pc_TC013101 | -2.79 | 0     | Down | -2.29 | 0.03      | Down | -1.41 | 0.26      |      | -0.84 | 0.35  |      | Expressed protein                                                        |      |
| Pc_TC013107 | -1.27 | 0.08  |      | -1.77 | 0.04      | Down | -0.93 | 0.42      |      | -0.12 | 0.89  |      | AGAMOUS-like 16                                                          |      |
| Pc_TC013115 | 1.53  | 0.13  |      | 2.06  | 0.05      | Up   | -0.96 | 0.62      |      | -1.25 | 0.43  |      | Uncharacterized protein                                                  |      |
| Pc_TC013116 | -1.28 | 0.31  |      | -3.11 | 0.06      |      | 2.54  | 0.04      | Up   | 1.26  | 0.2   |      | Leucine-rich repeat protein kinase family protein                        |      |
| Pc_TC013119 | -2.92 | 0.07  |      | -2.36 | 0.15      |      | 2.78  | 0.02      | Up   | 0.87  | 0.42  |      | OSJNBa0055H05.1 protein                                                  |      |
| Pc_TC013131 | 0.11  | 0.82  |      | -0.9  | 0.15      |      | 1.93  | 0.04      | Up   | 1.99  | 0     | Up   | Plant protein 1589 of unknown function                                   |      |
| Pc_TC013132 | -0.43 | 0.37  |      | -1.22 | 0.04      | Down | -0.75 | 0.44      |      | -0.62 | 0.32  |      | hercules receptor kinase 1                                               |      |
| Pc_TC013138 | -0.42 | 0.47  |      | -0.97 | 0.17      |      | 1.75  | 0.08      |      | 1.51  | 0.02  | Up   | Expressed protein                                                        |      |
| Pc_TC013152 | 3.47  | ##### | Up   | 0     | 1.41E-007 |      | 1.37  | 0.19      |      | -0.5  | 0.52  |      | protein,putative,unclassified,expressed                                  |      |
| Pc_TC013154 | -0.2  | 0.75  |      | 0.22  | 0.76      |      | 0     | 1.62E-006 |      | -3.88 | ##### | Down | Expressed protein                                                        |      |
| Pc_TC013169 | 2.48  | 0     | Up   | 0     | 0         |      | 1.57  | 0.2       |      | 0.63  | 0.54  |      | cytochrome P450, family 735, subfamily A, polypeptide 1                  |      |
| Pc_TC013180 | 0.49  | 0.64  |      | 0.93  | 0.38      |      | 0     | 0.01      |      | -3.54 | 0.03  | Down | Expressed protein                                                        |      |
| Pc_TC013183 | -1.12 | 0.1   |      | -1.53 | 0.06      |      | 2.22  | 0.03      | Up   | 1.08  | 0.12  |      | magnesium-protoporphyrin IX methyltransferase                            |      |
| Pc_TC013193 | -0.2  | 0.66  |      | -0.56 | 0.34      |      | 0.89  | 0.34      |      | 1.17  | 0.04  | Up   | related to AP2 2                                                         |      |
| Pc_TC013206 | -0.66 | 0.11  |      | -1.4  | 0.01      | Down | 1.74  | 0.05      | Up   | 0.52  | 0.35  |      | S-adenosyl-L-methionine-dependent methyltransferases superfamily protein |      |
| Pc_TC013218 | -2.47 | 0     | Down | -1.26 | 0.15      |      | 1.16  | 0.29      |      | -0.37 | 0.65  |      | Expressed protein                                                        |      |
| Pc_TC013220 | -0.41 | 0.31  |      | -1.25 | 0.02      | Down | 0.99  | 0.26      |      | 0.14  | 0.81  |      | Tetratricopeptide repeat (TPR)-like superfamily protein                  |      |
| Pc_TC013228 | 0.08  | 1     |      | -0.75 | 0.63      |      | 3.06  | 0.01      | Up   | 2.12  | 0.03  | Up   | Leucine-rich repeat (LRR) family protein                                 |      |
| Pc_TC013247 | 0.6   | 0.18  |      | 1.31  | 0.01      | Up   | -0.78 | 0.43      |      | 0.48  | 0.43  |      | peroxisomal NAD-malate dehydrogenase 1                                   |      |
| Pc_TC013253 | 2.27  | 0.01  | Up   | 0     | 0.04      |      | 1.38  | 0.33      |      | 0.56  | 0.67  |      | Putative uncharacterized protein                                         |      |
| Pc_TC013261 | 0.37  | 0.21  |      | 0.52  | 0.16      |      | -5.17 | 1.22E-007 | Down | -3.27 | ##### | Down | galactinol synthase 2                                                    |      |
| Pc_TC013282 | 3.33  | 0.03  | Up   | 0     | 0.67      |      | 4.43  | 0.01      | Up   | 1.63  | 0.49  |      | Expressed protein                                                        |      |
| Pc_TC013283 | 3.29  | ##### | Up   | 0     | 0         |      | 2.6   | 0.02      | Up   | 0.38  | 0.68  |      | alpha/beta-Hydrolases superfamily protein                                |      |
| Pc_TC013286 | 1.11  | 0.03  | Up   | 1.37  | 0.02      | Up   | -5.07 | 0         | Down | -0.42 | 0.55  |      | Expressed protein                                                        |      |
| Pc_TC013295 | 2.37  | 0.01  | Up   | 0     | 0.05      | Up   | 1     | 0.51      |      | -1.51 | 0.35  |      | Expressed protein                                                        |      |
| Pc_TC013300 | 0.54  | 0.1   |      | 1.01  | 0.01      | Up   | -3.85 | 6.87E-005 | Down | -1.69 | 0     | Down | Haloacid dehalogenase-like hydrolase (HAD) superfamily protein           |      |
| Pc_TC013302 | 1.91  | 0.01  | Up   | 0     | 0         |      | 0.98  | 0.44      |      | -0.09 | 0.97  |      | Expressed protein                                                        |      |
| Pc_TC013319 | -2.61 | 0     | Down | -2.33 | 0.01      | Down | -3.89 | 0         | Down | -3.45 | 0     | Down | Uncharacterized protein                                                  |      |
| Pc_TC013320 | 0.26  | 0.51  |      | 0.51  | 0.29      |      | -2.72 | 0.01      | Down | -0.55 | 0.33  |      | Uncharacterized protein                                                  |      |
| Pc_TC013321 | 1.68  | 0     | Up   | 0     | 1.06E-012 |      | 2.03  | 0.03      | Up   | 0.48  | 0.45  |      | Putative uncharacterized protein                                         |      |
| Pc_TC013323 | 1.08  | 0.57  |      | 0.87  | 0.72      |      | 3.18  | 0.04      | Up   | 2.02  | 0.17  |      | GDSL-like Lipase/Acylhydrolase superfamily protein                       |      |
| Pc_TC013324 | -0.02 | 0.97  |      | -0.22 | 0.71      |      | -3.77 | 0         | Down | -1.72 | 0.01  | Down | Expressed protein                                                        |      |
| Pc_TC013325 | 0.29  | 0.36  |      | 0.52  | 0.21      |      | -2.42 | 0.01      | Down | -1.47 | 0.01  | Down | Protein phosphatase 2C family protein                                    |      |
| Pc_TC013331 | -2.04 | 0     | Down | -2.26 | 0         | Down | 0.75  | 0.46      |      | -0.21 | 0.76  |      | pleiotropic regulatory locus 1                                           |      |
| Pc_TC013333 | 0.48  | 0.28  |      | -0.27 | 0.64      |      | 2.4   | 0.01      | Up   | 1.65  | 0     | Up   | expansin B2                                                              |      |
| Pc_TC013338 | 0.42  | 0.36  |      | 0.95  | 0.08      |      | -2.26 | 0.03      | Down | -1.01 | 0.12  |      | Expressed protein                                                        |      |
| Pc_TC013341 | 1.85  | 0     | Up   | 1     | 0.13      |      | -0.05 | 0.97      |      | 1.42  | 0.03  | Up   | S-adenosyl-L-methionine-dependent methyltransferases superfamily protein |      |
| Pc_TC013343 | 2.25  | 0.09  |      | 2.81  | 0.04      | Up   | 1.09  | 0.63      |      | 1.21  | 0.5   |      | Uncharacterized protein                                                  |      |
| Pc_TC013347 | -3.31 | 0.02  | Down | -1.16 | 0.37      |      | -0.43 | 0.79      |      | -1.96 | 0.12  |      | BEL1-like homeodomain 1                                                  |      |
| Pc_TC013354 | 1.2   | 0.03  | Up   | 1.19  | 0.07      |      | -0.01 | 1         |      | -0.4  | 0.59  |      | gamma-tubulin                                                            |      |
| Pc_TC013359 | -0.51 | 1     |      | 1.06  | 0.69      |      | 3.98  | 0.01      | Up   | -0.96 | 0.86  |      | Uncharacterized protein                                                  |      |
| Pc_TC013361 | 1.29  | 0.02  | Up   | 1.82  | 0         | Up   | -2.3  | 0.05      |      | -0.92 | 0.23  |      | Expressed protein                                                        |      |
| Pc_TC013365 | 2.36  | 0.02  | Up   | 0     | 0.15      |      | 1.4   | 0.39      |      | 0.28  | 0.94  |      | Metallothionein-like protein                                             |      |
| Pc_TC013371 | 0.68  | 0.05  |      | 0.81  | 0.07      |      | -3.01 | 0         | Down | -0.63 | 0.25  |      | UDP-glucosyl transferase 73B5                                            |      |
| Pc_TC013374 | 0.36  | 0.63  |      | 0     | 1         |      | 2.31  | 0.03      | Up   | 1.67  | 0.03  | Up   | cytochrome P450, family 98, subfamily A, polypeptide 3                   |      |
| Pc_TC013376 | -1.06 | 0.22  |      | -0.36 | 0.72      |      | 0.09  | 0.96      |      | -2.83 | 0.01  | Down | Uncharacterized protein                                                  |      |
| Pc_TC013383 | -1.01 | 0.16  |      | 0.97  | 0.18      |      | -2.59 | 0.04      | Down | -1.71 | 0.05  | Down | WRKY DNA-binding protein 18                                              | WRKY |

|             |       |       |      |  |       |           |      |       |           |      |       |       |      |                                                                               |       |
|-------------|-------|-------|------|--|-------|-----------|------|-------|-----------|------|-------|-------|------|-------------------------------------------------------------------------------|-------|
| Pc_TC013395 | 1.76  | 0.19  |      |  | 0     | 0.27      |      | 3.5   | 0.02      | Up   | 1.7   | 0.23  |      | Expressed protein                                                             |       |
| Pc_TC013405 | 0.58  | 0.05  |      |  | 0.61  | 0.1       |      | -2.4  | 0.01      | Down | -0.55 | 0.26  |      | Uncharacterized protein                                                       |       |
| Pc_TC013416 | -1.27 | 0.12  |      |  | -2.05 | 0.04      | Down | 1.88  | 0.09      |      | -0.66 | 0.45  |      | Retrovirus-related Pol polyprotein LINE-1                                     |       |
| Pc_TC013425 | -1.35 | 0.2   |      |  | 0.26  | 0.83      |      | -1.55 | 0.28      |      | -3.13 | 0.02  | Down | Putative uncharacterized protein Sb05g025250                                  |       |
| Pc_TC013437 | 1.9   | 0.01  | Up   |  | 0     | 0.01      |      | 0.89  | 0.5       |      | 0.63  | 0.55  |      | late embryogenesis abundant protein,putative                                  |       |
| Pc_TC013439 | 0.26  | 0.67  |      |  | 1.03  | 0.12      |      | 0     | 4.82E-006 |      | -4.85 | ##### | Down | Expressed protein                                                             |       |
| Pc_TC013447 | 1.89  | 0.38  |      |  | 3.92  | 0.01      | Up   | 0     | 0.53      |      | 2.8   | 0.1   |      | Putative uncharacterized protein P0035F08.15                                  |       |
| Pc_TC013451 | -2.92 | 0.03  | Down |  | -1.72 | 0.18      |      | 1.7   | 0.16      |      | 0.4   | 0.71  |      | ortholog of human splicing factor SC35                                        |       |
| Pc_TC013454 | 3.63  | 0     | Up   |  | 0     | 0.36      |      | 2.46  | 0.14      |      | 0.21  | 1     |      | Expressed protein                                                             |       |
| Pc_TC013477 | 2.65  | 0     | Up   |  | 0     | 0.01      |      | 1.5   | 0.25      |      | 0.4   | 0.75  |      | DNAJ homologue 2                                                              |       |
| Pc_TC013480 | -1.55 | 0.1   |      |  | -0.4  | 0.7       |      | -1.01 | 0.44      |      | -2.26 | 0.04  | Down | Expressed protein                                                             |       |
| Pc_TC013482 | 2.79  | 0     | Up   |  | 0     | 0.09      |      | 1.66  | 0.26      |      | 1.04  | 0.42  |      | Expressed protein                                                             |       |
| Pc_TC013502 | -1.62 | 0.03  | Down |  | -0.58 | 0.48      |      | 0.95  | 0.38      |      | -0.53 | 0.51  |      | Uncharacterized protein                                                       |       |
| Pc_TC013519 | 2.2   | 0     | Up   |  | 0.65  | 0.43      |      | 1.07  | 0.34      |      | 2.6   | 0     | Up   | Putative uncharacterized protein                                              |       |
| Pc_TC013521 | 1.59  | 0     | Up   |  | 0     | 8.47E-009 |      | 1.03  | 0.32      |      | 0.21  | 0.78  |      | ARM repeat superfamily protein                                                |       |
| Pc_TC013525 | -0.51 | 0.19  |      |  | -1.64 | 0         | Down | 1.3   | 0.13      |      | 0.85  | 0.11  |      | Protein kinase family protein with leucine-rich repeat domain                 |       |
| Pc_TC013531 | -2.18 | 0.07  |      |  | -2.94 | 0.04      | Down | 0.8   | 0.54      |      | -1.96 | 0.11  |      | Putative uncharacterized protein                                              |       |
| Pc_TC013541 | -0.48 | 0.64  |      |  | 0.5   | 0.62      |      | -1.72 | 0.23      |      | -2.37 | 0.05  | Down | Expressed protein                                                             |       |
| Pc_TC013550 | -0.15 | 0.88  |      |  | -0.26 | 0.81      |      | 2.26  | 0.04      | Up   | 1.78  | 0.02  | Up   | Plant VAMP (vesicle-associated membrane protein) family protein               |       |
| Pc_TC013551 | 0.63  | 0.29  |      |  | 1.66  | 0.01      | Up   | -6.11 | 0         | Down | -2.35 | 0.01  | Down | Expressed protein                                                             |       |
| Pc_TC013553 | 0.36  | 0.44  |      |  | 0.99  | 0.07      |      | -2.03 | 0.05      |      | -1.69 | 0.01  | Down | Eukaryotic aspartyl protease family protein                                   |       |
| Pc_TC013557 | -0.34 | 0.59  |      |  | 0.51  | 0.46      |      | -2.63 | 0.03      | Down | -1.65 | 0.04  | Down | Expressed protein                                                             |       |
| Pc_TC013579 | 1.03  | 0.02  | Up   |  | 2.11  | 2.66E-005 | Up   | -0.72 | 0.46      |      | 0.26  | 0.67  |      | temperature-induced lipocalin                                                 |       |
| Pc_TC013590 | 0.16  | 0.79  |      |  | 0.7   | 0.28      |      | -2.86 | 0.01      | Down | -1.99 | 0.01  | Down | Expressed protein                                                             |       |
| Pc_TC013597 | 0.12  | 0.79  |      |  | -0.35 | 0.55      |      | 1.06  | 0.25      |      | 1.22  | 0.04  | Up   | methionine synthase 2                                                         |       |
| Pc_TC013599 | -0.2  | 0.65  |      |  | -1.23 | 0.04      | Down | 0.21  | 0.82      |      | 0.57  | 0.32  |      | cytochrome P450, family 706, subfamily A, polypeptide 3                       |       |
| Pc_TC013601 | 0.45  | 0.17  |      |  | 0.49  | 0.25      |      | -3.75 | 0         | Down | -1.62 | 0     | Down | PHYTOENE SYNTHASE                                                             |       |
| Pc_TC013604 | -3.78 | 0.01  | Down |  | -4.8  | 0         | Down | 0.2   | 0.9       |      | -0.1  | 0.95  |      | Expressed protein                                                             |       |
| Pc_TC013608 | 2.47  | 0     | Up   |  | 0     | 0.01      |      | 1.55  | 0.21      |      | 0.44  | 0.69  |      | Expressed protein                                                             |       |
| Pc_TC013610 | -0.49 | 0.36  |      |  | 0.13  | 0.84      |      | 2.01  | 0.04      | Up   | 1.33  | 0.03  | Up   | proline-rich protein 4                                                        |       |
| Pc_TC013626 | -0.4  | 0.24  |      |  | 0.72  | 0.09      |      | -3.99 | 4.24E-005 | Down | -1.98 | 0     | Down | arginine decarboxylase 2                                                      |       |
| Pc_TC013627 | 0.5   | 0.09  |      |  | 1.03  | 0.01      | Up   | -3.13 | 0         | Down | -1.29 | 0.01  | Down | Calcium-binding EF-hand family protein                                        |       |
| Pc_TC013628 | -0.55 | 0.44  |      |  | 0.04  | 0.98      |      | -4.16 | 0         | Down | -1.58 | 0.07  |      | Plant protein of unknown function (DUF946)                                    |       |
| Pc_TC013630 | 0.21  | 0.61  |      |  | 0.41  | 0.42      |      | -1.85 | 0.06      |      | -1.38 | 0.02  | Down | Transducin/WD40 repeat-like superfamily protein                               |       |
| Pc_TC013633 | 0.49  | 0.4   |      |  | 0.63  | 0.36      |      | -3.87 | 0         | Down | -4.21 | ##### | Down | myb domain protein 20                                                         | MYB   |
| Pc_TC013667 | 3.95  | ##### | Up   |  | 0     | 0.2       |      | 5.06  | 0         | Up   | 2.43  | 0.04  | Up   | sequence-specific DNA binding transcription factors                           |       |
| Pc_TC013670 | 0.37  | 0.38  |      |  | 0.57  | 0.27      |      | -3.07 | 0         | Down | -1.68 | 0.01  | Down | Protein phosphatase 2C family protein                                         |       |
| Pc_TC013671 | 0.38  | 0.69  |      |  | 2.13  | 0.01      | Up   | 1.89  | 0.11      |      | 1.35  | 0.13  |      | Protein of unknown function, DUF642                                           |       |
| Pc_TC013700 | -0.41 | 0.52  |      |  | -0.99 | 0.2       |      | -2.29 | 0.05      |      | -2.68 | 0     | Down | alpha-amylase-like                                                            |       |
| Pc_TC013709 | -4.53 | ##### | Down |  | -4.55 | 1.99E-007 | Down | -1.45 | 0.17      |      | -4.25 | ##### | Down | cytochrome c oxidase subunit 3                                                |       |
| Pc_TC013716 | -0.34 | 0.56  |      |  | 0.03  | 0.97      |      | 1.98  | 0.05      | Up   | -0.11 | 0.88  |      | light harvesting complex of photosystem II 5                                  |       |
| Pc_TC013717 | 2.57  | 0     | Up   |  | 0     | 0.02      |      | 2.46  | 0.05      | Up   | 0.27  | 0.85  |      | Putative uncharacterized protein                                              |       |
| Pc_TC013729 | -4.13 | ##### | Down |  | 0     | 3.34E-010 |      | -1.5  | 0.17      |      | -3.58 | ##### | Down | apocytochrome b                                                               |       |
| Pc_TC013732 | 0.08  | 0.96  |      |  | -3.15 | 0.01      | Down | 0.05  | 0.99      |      | -0.37 | 0.71  |      | Os01g0144300 protein                                                          |       |
| Pc_TC013745 | 1.26  | 0     | Up   |  | 0.76  | 0.16      |      | 1.85  | 0.04      | Up   | 0.49  | 0.41  |      | Thiamine pyrophosphate dependent pyruvate decarboxylase family protein        |       |
| Pc_TC013747 | -2.95 | 0     | Down |  | -2.23 | 0.03      | Down | -0.2  | 0.88      |      | -3.4  | 0     | Down | Mono-/di-acylglycerol lipase, N-terminal; Lipase, class 3                     |       |
| Pc_TC013774 | 0.37  | 0.39  |      |  | 0.38  | 0.47      |      | -2.17 | 0.03      | Down | -1.13 | 0.07  |      | Putative polyprotein                                                          |       |
| Pc_TC013784 | 0.25  | 0.45  |      |  | 0.49  | 0.25      |      | -2    | 0.02      | Down | -1.57 | 0     | Down | Transducin/WD40 repeat-like superfamily protein                               |       |
| Pc_TC013796 | 3.09  | ##### | Up   |  | 0     | 0.02      |      | 2.73  | 0.03      | Up   | 0.3   | 0.83  |      | FK506- and rapamycin-binding protein 15 kD-2                                  |       |
| Pc_TC013805 | 0.64  | 0.05  |      |  | 1.53  | 0         | Up   | -2.36 | 0.01      | Down | -1.04 | 0.05  | Down | NAC (No Apical Meristem) domain transcriptional regulator superfamily protein | NAC   |
| Pc_TC013809 | 4.29  | 0     | Up   |  | 0     | 0.67      |      | 3.93  | 0.03      | Up   | 1.43  | 0.58  |      | Expressed protein                                                             |       |
| Pc_TC013820 | -4.08 | ##### | Down |  | -6.71 | 8.29E-018 | Down | -1.45 | 0.12      |      | -4.39 | ##### | Down | cytochrome oxidase                                                            |       |
| Pc_TC013826 | 0.45  | 0.17  |      |  | 0.97  | 0.02      |      | -2.67 | 0         | Down | -0.49 | 0.34  |      | Haloacid dehalogenase-like hydrolase (HAD) superfamily protein                |       |
| Pc_TC013827 | 0.57  | 0.43  |      |  | 1.83  | 0.01      | Up   | -2.74 | 0.04      | Down | -2.91 | 0.01  | Down | Os01g0152950 protein                                                          |       |
| Pc_TC013847 | 0.78  | 0.13  |      |  | 0.32  | 0.62      |      | 0.04  | 0.98      |      | 1.38  | 0.03  | Up   | WRKY DNA-binding protein 69                                                   | WRKY  |
| Pc_TC013848 | 1.17  | 0.16  |      |  | -0.4  | 0.76      |      | 2.52  | 0.03      | Up   | 1.14  | 0.22  |      | nuclear factor Y, subunit C4                                                  | CCAAT |
| Pc_TC013852 | 2.9   | ##### | Up   |  | 0     | 2.36E-007 |      | 2.43  | 0.02      | Up   | 1.27  | 0.07  |      | Disease resistance-responsive (dirigent-like protein) family protein          |       |
| Pc_TC013857 | -0.83 | 0.07  |      |  | -1.64 | 0.01      | Down | 1.06  | 0.24      |      | 0.46  | 0.43  |      | NAD(P)-linked oxidoreductase superfamily protein                              |       |
| Pc_TC013861 | 1.12  | 0.22  |      |  | 2.67  | 0         | Up   | 0     | 0.01      |      | -3.46 | 0.03  | Down | Expressed protein                                                             | NAC   |
| Pc_TC013862 | 0.39  | 0.33  |      |  | 0.39  | 0.45      |      | -2.47 | 0.01      | Down | -1.94 | 0     | Down | Major facilitator superfamily protein                                         |       |
| Pc_TC013867 | -2.41 | 0.04  | Down |  | -0.16 | 0.91      |      | -2.5  | 0.1       |      | -1.18 | 0.28  |      | Expressed protein                                                             |       |
| Pc_TC013898 | 0.7   | 0.18  |      |  | 1.32  | 0.03      | Up   | -0.56 | 0.59      |      | -0.04 | 0.96  |      | Preprotein translocase Sec, Sec61-beta subunit protein                        |       |

|             |       |       |      |  |       |           |      |  |       |           |      |       |       |      |                                                                            |            |
|-------------|-------|-------|------|--|-------|-----------|------|--|-------|-----------|------|-------|-------|------|----------------------------------------------------------------------------|------------|
| Pc_TC013901 | 0.69  | 0.19  |      |  | 1.38  | 0.02      | Up   |  | 1.65  | 0.09      |      | 0.69  | 0.3   |      | cinnamoyl coa reductase 1                                                  |            |
| Pc_TC013906 | 0.63  | 0.03  |      |  | 0.58  | 0.12      |      |  | -2.39 | 0.01      | Down | -0.88 | 0.07  |      | RELA/SPOT homolog 2                                                        |            |
| Pc_TC013910 | 0.26  | 0.49  |      |  | 0.58  | 0.22      |      |  | -1.64 | 0.08      |      | -1.16 | 0.04  | Down | Sec14p-like phosphatidylinositol transfer family protein                   |            |
| Pc_TC013930 | 3.78  | 0.05  | Up   |  | 4.15  | 0.03      | Up   |  | 1.5   | 0.78      |      | 0     | 0.9   |      | Galactosyltransferase family protein                                       |            |
| Pc_TC013932 | -0.55 | 0.22  |      |  | -1.58 | 0.01      | Down |  | 1.83  | 0.04      | Up   | 1.07  | 0.06  |      | Stress responsive alpha-beta barrel domain protein                         |            |
| Pc_TC013937 | 1.62  | 0     | Up   |  | 0     | 3.38E-011 |      |  | 1.71  | 0.08      |      | 0.03  | 0.97  |      | ECA1 gametogenesis related family protein                                  |            |
| Pc_TC013939 | 2.14  | 0     | Up   |  | 0     | 0         |      |  | 2.61  | 0.02      | Up   | 0.63  | 0.48  |      | Os01g0916000 protein                                                       |            |
| Pc_TC013943 | -1.46 | 0.05  | Down |  | -1.86 | 0.03      | Down |  | -0.02 | 0.99      |      | -0.33 | 0.68  |      | Expressed protein                                                          |            |
| Pc_TC013949 | -0.63 | 0.12  |      |  | -1.03 | 0.05      | Down |  | 1.63  | 0.06      |      | 0.67  | 0.21  |      | oligopeptide transporter 4                                                 |            |
| Pc_TC013953 | 1.08  | 0.15  |      |  | -0.42 | 0.7       |      |  | 2.49  | 0.03      | Up   | 1.51  | 0.07  |      | unknown protein                                                            |            |
| Pc_TC013957 | -5.02 | ##### | Down |  | -6.04 | 2.20E-010 | Down |  | -1.46 | 0.16      |      | -4.89 | ##### | Down | AP2 domain containing protein,expressed                                    |            |
| Pc_TC013971 | 0.35  | 0.35  |      |  | 0.49  | 0.29      |      |  | 1.5   | 0.08      |      | 1.77  | 0     | Up   | multidrug resistance-associated protein 3                                  |            |
| Pc_TC013973 | 1.07  | 0     | Up   |  | -0.52 | 0.32      |      |  | -0.48 | 0.6       |      | 0.41  | 0.46  |      | somatic embryogenesis receptor-like kinase 1                               |            |
| Pc_TC013991 | 0.45  | 0.44  |      |  | 0.07  | 0.93      |      |  | 2.18  | 0.03      | Up   | 1.57  | 0.02  | Up   | photosystem II reaction center PSB28 protein                               |            |
| Pc_TC013992 | 0.82  | 0.27  |      |  | 1.72  | 0.03      | Up   |  | -4.71 | 0.01      | Down | -1.26 | 0.21  |      | Uncharacterized protein                                                    |            |
| Pc_TC013997 | -1.49 | 0.03  | Down |  | -0.91 | 0.23      |      |  | 1.24  | 0.23      |      | 0.34  | 0.64  |      | SPOC domain / Transcription elongation factor S-II protein                 |            |
| Pc_TC013998 | -2.38 | ##### | Down |  | -1.66 | 0.01      | Down |  | -2.41 | 0.03      | Down | -2.66 | 0     | Down | Expressed protein                                                          |            |
| Pc_TC014003 | 1.06  | 0.03  | Up   |  | 2.11  | 0         | Up   |  | -2.4  | 0.03      | Down | 0     | 1     |      | Translation initiation factor IF6                                          |            |
| Pc_TC014005 | 3.34  | ##### | Up   |  | 0     | 0.02      |      |  | 2.85  | 0.02      | Up   | 1.65  | 0.09  |      | Zn-dependent exopeptidases superfamily protein                             |            |
| Pc_TC014015 | 0.35  | 0.3   |      |  | 0.51  | 0.24      |      |  | -1.5  | 0.09      |      | -1.09 | 0.04  | Down | Regulator of chromosome condensation (RCC1) family protein                 |            |
| Pc_TC014067 | -0.08 | 0.86  |      |  | -1.15 | 0.04      | Down |  | -0.04 | 0.96      |      | 0.25  | 0.67  |      | basic leucine-zipper 2                                                     | bZIP       |
| Pc_TC014070 | 2.26  | ##### | Up   |  | -9.7  | 1.17E-053 | Down |  | 2.24  | 0.01      | Up   | 0.99  | 0.04  |      | Os06g0316100 protein                                                       |            |
| Pc_TC014077 | -2.57 | 0.04  | Down |  | -2    | 0.12      |      |  | 2.62  | 0.02      | Up   | -0.02 | 1     |      | basic helix-loop-helix (bHLH) DNA-binding superfamily protein              | bHLH       |
| Pc_TC014119 | 0.03  | 1     |      |  | 1.91  | 0.02      | Up   |  | 1.35  | 0.25      |      | 0.17  | 0.89  |      | lipoygenase 1                                                              |            |
| Pc_TC014120 | 1.01  | 0.06  |      |  | 1.76  | 0         | Up   |  | -0.1  | 0.93      |      | 1.16  | 0.08  |      | D-arabinono-1,4-lactone oxidase family protein                             |            |
| Pc_TC014135 | 1.89  | 0     | Up   |  | 0     | 3.51E-005 |      |  | 1.6   | 0.15      |      | 1.03  | 0.19  |      | isocitrate dehydrogenase V                                                 |            |
| Pc_TC014143 | 0.24  | 0.56  |      |  | -1.79 | 0         | Down |  | -0.67 | 0.47      |      | 1.23  | 0.03  | Up   | Terpenoid cyclases/Protein prenyltransferases superfamily protein          |            |
| Pc_TC014145 | 1.56  | 0.01  | Up   |  | 0     | 2.00E-005 |      |  | 1.69  | 0.12      |      | 0.81  | 0.3   |      | Expressed protein                                                          |            |
| Pc_TC014149 | 3.89  | ##### | Up   |  | 0     | 0.2       |      |  | 4.27  | 0         | Up   | -0.96 | 0.68  |      | HVA22-like protein K                                                       |            |
| Pc_TC014151 | 0.81  | 0.07  |      |  | 1.07  | 0.05      | Up   |  | -0.67 | 0.5       |      | 1.05  | 0.08  |      | cytochrome P450,family 83,subfamily B,polypeptide 1                        |            |
| Pc_TC014153 | -1.31 | 0.17  |      |  | -0.44 | 0.68      |      |  | 3.12  | 0.01      | Up   | 1.96  | 0.01  | Up   | cytochrome P450,family 81,subfamily D,polypeptide 2                        |            |
| Pc_TC014154 | 4.75  | ##### | Up   |  | 0     | 0.67      |      |  | 3.31  | 0.08      |      | 0.63  | 0.96  |      | Myzus persicae-induced lipase 1                                            |            |
| Pc_TC014158 | 0.44  | 0.29  |      |  | 0.13  | 0.8       |      |  | 1.05  | 0.25      |      | 1.18  | 0.04  | Up   | cytochrome P450,family 704,subfamily A,polypeptide 2                       |            |
| Pc_TC014176 | 0.56  | 0.16  |      |  | -1.32 | 0.02      | Down |  | 0.28  | 0.76      |      | 1.68  | 0     | Up   | Terpenoid cyclases/Protein prenyltransferases superfamily protein          |            |
| Pc_TC014178 | 0.43  | 0.53  |      |  | 0.18  | 0.84      |      |  | -2.52 | 0.05      | Down | -1.58 | 0.07  |      | alpha/beta-Hydrolases superfamily protein                                  |            |
| Pc_TC014186 | -1.41 | 0.01  | Down |  | -1.96 | 0         | Down |  | -2.43 | 0.02      | Down | -0.73 | 0.26  |      | cullin 1                                                                   |            |
| Pc_TC014187 | -0.25 | 0.6   |      |  | -0.46 | 0.44      |      |  | 1.91  | 0.04      | Up   | 0.95  | 0.11  |      | oxidoreductases,acting on NADH or NADPH                                    |            |
| Pc_TC014188 | 1.65  | 0.01  | Up   |  | 0     | 6.03E-006 |      |  | 2.07  | 0.05      |      | 0.68  | 0.38  |      | villin 2                                                                   |            |
| Pc_TC014191 | 3.4   | 0.02  | Up   |  | 0     | 0.67      |      |  | 2.9   | 0.15      |      | 1.43  | 0.58  |      | Expressed protein                                                          |            |
| Pc_TC014195 | 0.2   | 0.63  |      |  | 0.48  | 0.34      |      |  | -1.68 | 0.08      |      | -1.5  | 0.02  | Down | RING/FYVE/PHD zinc finger superfamily protein                              | Alfin-like |
| Pc_TC014199 | -1.38 | 0.4   |      |  | -3.4  | 0.13      |      |  | 1     | 0.51      |      | 2.07  | 0.04  | Up   | SWIM zinc finger family protein                                            |            |
| Pc_TC014203 | -1.43 | 0.01  | Down |  | -1.95 | 0         | Down |  | -2.88 | 0.01      | Down | -0.96 | 0.14  |      | adenine phosphoribosyl transferase 2                                       |            |
| Pc_TC014211 | 2.4   | 0.19  |      |  | 4.34  | 0         | Up   |  | 0.5   | 1         |      | 0.95  | 0.81  |      | Ribosomal protein L6 family protein                                        |            |
| Pc_TC014214 | -0.57 | 0.49  |      |  | 0     | 1         |      |  | -0.77 | 0.54      |      | -2.34 | 0.02  | Down | Expressed protein                                                          |            |
| Pc_TC014225 | -2.25 | 0     | Down |  | -1.32 | 0.07      |      |  | -2.79 | 0.02      | Down | -1.53 | 0.04  | Down | Expressed protein                                                          |            |
| Pc_TC014228 | 1.78  | 0.23  |      |  | 1.23  | 0.53      |      |  | 2.03  | 0.25      |      | 3.43  | 0     | Up   | OSIGBa0114M03.4 protein                                                    |            |
| Pc_TC014231 | 2.13  | 0     | Up   |  | 0     | 0         |      |  | 1.49  | 0.22      |      | -0.22 | 0.86  |      | ubiquitin 6                                                                |            |
| Pc_TC014239 | 1.33  | 0.01  | Up   |  | 0     | 3.87E-011 |      |  | 0.9   | 0.37      |      | -0.66 | 0.34  |      | ATP citrate lyase subunit B 2                                              |            |
| Pc_TC014240 | -0.13 | 0.73  |      |  | 0.54  | 0.25      |      |  | -1.52 | 0.1       |      | -1.28 | 0.03  | Down | Expressed protein                                                          |            |
| Pc_TC014245 | 0     | 1     |      |  | -0.27 | 0.65      |      |  | -1.55 | 0.13      |      | -1.32 | 0.05  | Down | Protein of unknown function (DUF3755)                                      |            |
| Pc_TC014249 | 0.3   | 0.86  |      |  | 2.31  | 0.02      | Up   |  | -0.76 | 0.68      |      | -1.96 | 0.22  |      | Uncharacterized protein                                                    |            |
| Pc_TC014250 | 0     | 1     |      |  | 2.24  | 0.01      | Up   |  | -0.65 | 0.68      |      | -0.7  | 0.57  |      | Ribosomal protein S4 (RPS4A) family protein                                |            |
| Pc_TC014251 | -0.19 | 0.69  |      |  | -1.23 | 0.04      | Down |  | 0.94  | 0.31      |      | 0.49  | 0.4   |      | chloroplast sensor kinase                                                  |            |
| Pc_TC014252 | -0.45 | 0.61  |      |  | -0.06 | 0.98      |      |  | 2.11  | 0.06      |      | 2.47  | 0     | Up   | Phosphate-responsive 1 family protein                                      |            |
| Pc_TC014254 | 2.04  | 0.01  | Up   |  | 0     | 0.01      |      |  | 2.38  | 0.05      |      | 0.44  | 0.71  |      | Expressed protein                                                          |            |
| Pc_TC014259 | 0.2   | 0.61  |      |  | 1.14  | 0.02      | Up   |  | -5    | 9.12E-006 | Down | -3.08 | ##### | Down | chloroplast beta-amylase                                                   |            |
| Pc_TC014264 | -0.9  | 0.23  |      |  | -0.61 | 0.48      |      |  | 2.36  | 0.03      | Up   | 1.77  | 0.01  | Up   | Expressed protein                                                          |            |
| Pc_TC014284 | 0.05  | 0.86  |      |  | -0.64 | 0.11      |      |  | 1.83  | 0.03      | Up   | 0.9   | 0.07  |      | photosystem II subunit QA                                                  |            |
| Pc_TC014288 | 2.06  | 0.01  | Up   |  | 0     | 0         |      |  | 0.57  | 0.68      |      | -0.75 | 0.52  |      | 26S proteasome regulatory complex,non-ATPase subcomplex,Rpn2/Psmd1 subunit |            |
| Pc_TC014297 | 2.16  | 0.01  | Up   |  | 0     | 0.01      |      |  | 1.11  | 0.4       |      | 0.46  | 0.7   |      | calmodulin 7                                                               |            |
| Pc_TC014300 | 2.7   | 0.01  | Up   |  | 0     | 0.15      |      |  | 3.04  | 0.03      | Up   | 1.46  | 0.26  |      | Expressed protein                                                          |            |
| Pc_TC014302 | 1.19  | 0     | Up   |  | 1.2   | 0.02      | Up   |  | -0.88 | 0.36      |      | 1.13  | 0.05  | Up   | laccase 7                                                                  |            |

|             |       |       |      |       |           |      |  |       |           |      |  |       |       |      |                                                          |     |
|-------------|-------|-------|------|-------|-----------|------|--|-------|-----------|------|--|-------|-------|------|----------------------------------------------------------|-----|
| Pc_TC014303 | 1.83  | 0.04  | Up   | 0.57  | 0.66      |      |  | -0.98 | 0.57      |      |  | -0.37 | 0.81  |      | Expressed protein                                        |     |
| Pc_TC014305 | -0.3  | 0.88  |      | 2.36  | 0.01      | Up   |  | -0.03 | 1         |      |  | -0.75 | 0.61  |      | delta subunit of Mt ATP synthase                         |     |
| Pc_TC014342 | 0.59  | 0.19  |      | 1     | 0.07      |      |  | -2.32 | 0.03      | Down |  | -0.52 | 0.42  |      | photosystem II subunit R                                 |     |
| Pc_TC014347 | 0.23  | 0.54  |      | 0.71  | 0.13      |      |  | -2.15 | 0.02      | Down |  | -1.14 | 0.05  | Down | Suff/NifU family protein                                 |     |
| Pc_TC014354 | 0.47  | 0.44  |      | 0.4   | 0.58      |      |  | 0     | 8.31E-006 |      |  | -3.02 | 0     | Down | Ethylene insensitive 3 family protein                    | EIL |
| Pc_TC014356 | 0.11  | 0.92  |      | -0.05 | 0.99      |      |  | 3.02  | 0.01      | Up   |  | 0.22  | 0.82  |      | DNA GYRASE A                                             |     |
| Pc_TC014362 | -0.92 | 0.65  |      | -0.94 | 0.67      |      |  | 3.01  | 0.03      | Up   |  | 0.95  | 0.49  |      | Expressed protein                                        |     |
| Pc_TC014364 | -0.37 | 0.66  |      | -0.08 | 0.96      |      |  | 2.88  | 0.01      | Up   |  | 1.49  | 0.06  |      | Expressed protein                                        |     |
| Pc_TC014368 | -0.44 | 0.54  |      | 0.87  | 0.24      |      |  | -1.7  | 0.16      |      |  | -3.3  | 0     | Down | Uncharacterized protein                                  |     |
| Pc_TC014371 | -3.31 | 0.02  | Down | -1.53 | 0.25      |      |  | -0.98 | 0.52      |      |  | -3.18 | 0.03  | Down | Expressed protein                                        |     |
| Pc_TC014383 | 3.12  | 0     | Up   | 0.06  | 1         |      |  | 1.09  | 0.49      |      |  | 1.63  | 0.16  |      | Expressed protein                                        |     |
| Pc_TC014392 | 0.73  | 0.26  |      | 1     | 0.17      |      |  | -2.58 | 0.04      | Down |  | -0.18 | 0.84  |      | Expressed protein                                        |     |
| Pc_TC014393 | 0.95  | 0.54  |      | 0     | 0.2       |      |  | 2.53  | 0.09      |      |  | 2.36  | 0.05  | Up   | NB-ARC domain-containing disease resistance protein      |     |
| Pc_TC014394 | -1.05 | 0.1   |      | -1.39 | 0.07      |      |  | -1.05 | 0.34      |      |  | -3.09 | 0     | Down | cytochrome oxidase                                       |     |
| Pc_TC014408 | 2.72  | 0.03  | Up   | 0     | 0.36      |      |  | 2.9   | 0.07      |      |  | 0.63  | 0.82  |      | Expressed protein                                        |     |
| Pc_TC014426 | 0.21  | 0.49  |      | 0.1   | 0.78      |      |  | -2.42 | 0.01      | Down |  | -1.16 | 0.02  | Down | Heavy metal transport/detoxification superfamily protein |     |
| Pc_TC014432 | 3.47  | 0.02  | Up   | 3.15  | 0.06      |      |  | 2.09  | 0.38      |      |  | 2.87  | 0.09  |      | Expressed protein                                        |     |
| Pc_TC014447 | 0.81  | 0.07  |      | 1.6   | 0         | Up   |  | -1.3  | 0.2       |      |  | 0.16  | 0.8   |      | basic chitinase                                          |     |
| Pc_TC014450 | 0.13  | 0.83  |      | 0.53  | 0.41      |      |  | -3.75 | 0         | Down |  | -1.7  | 0.02  | Down | Expressed protein                                        |     |
| Pc_TC014467 | 3.94  | 0     | Up   | 0     | 0.67      |      |  | 3.59  | 0.05      | Up   |  | 0.21  | 1     |      | GroES-like zinc-binding dehydrogenase family protein     |     |
| Pc_TC014475 | -0.01 | 1     |      | 0.38  | 0.56      |      |  | -1.43 | 0.18      |      |  | -1.59 | 0.03  | Down | Expressed protein                                        |     |
| Pc_TC014482 | 2.13  | ##### | Up   | 0     | 9.84E-010 |      |  | 1.53  | 0.13      |      |  | 0.63  | 0.35  |      | Citrate synthase family protein                          |     |
| Pc_TC014494 | 2.78  | 0.02  | Up   | 0     | 0.36      |      |  | 2.26  | 0.19      |      |  | -0.37 | 0.99  |      | Expressed protein                                        |     |
| Pc_TC014499 | -1.21 | 0.18  |      | -1.06 | 0.3       |      |  | -3.2  | 0.03      | Down |  | -2.66 | 0.02  | Down | Ribosomal protein S12/S23 family protein                 |     |
| Pc_TC014501 | 0.35  | 0.32  |      | 0.86  | 0.05      |      |  | -2.44 | 0.01      | Down |  | -1.1  | 0.05  | Down | highly ABA-induced PP2C gene 2                           |     |
| Pc_TC014505 | 0.67  | 0.27  |      | 1.63  | 0.01      | Up   |  | -0.89 | 0.43      |      |  | 0.02  | 0.99  |      | Galactosyltransferase family protein                     |     |
| Pc_TC014506 | 0.36  | 0.64  |      | -4.47 | 0         | Down |  | 2.09  | 0.06      |      |  | 0.03  | 1     |      | Putative uncharacterized protein                         |     |
| Pc_TC014510 | -0.34 | 0.3   |      | 1.23  | 0         | Up   |  | -0.62 | 0.46      |      |  | -0.8  | 0.12  |      | Cysteine-rich receptor-like protein kinase 26            |     |
| Pc_TC014521 | 3.69  | 0     | Up   | 0     | 0.36      |      |  | 2.59  | 0.12      |      |  | 0.95  | 0.64  |      | ubiquitin-conjugating enzyme 12                          |     |
| Pc_TC014528 | 0.82  | 0.63  |      | 2.68  | 0.02      | Up   |  | 0     | 0.14      |      |  | 0     | 0.11  |      | Expressed protein                                        |     |
| Pc_TC014532 | -2.02 | 0     | Down | -0.76 | 0.24      |      |  | -2.21 | 0.04      | Down |  | -2.98 | ##### | Down | photosystem II light harvesting complex gene 2.1         |     |
| Pc_TC014555 | 1.2   | 0.02  | Up   | 2.18  | 0         | Up   |  | -3.76 | 0         | Down |  | -0.72 | 0.31  |      | unknown protein                                          |     |
| Pc_TC014563 | 0.38  | 0.25  |      | 0.68  | 0.11      |      |  | -1.83 | 0.04      | Down |  | -1.28 | 0.02  | Down | INVOLVED IN: intracellular protein transport             |     |
| Pc_TC014572 | 2.93  | 0     | Up   | 0     | 0.09      |      |  | 1.83  | 0.21      |      |  | 0.91  | 0.49  |      | NAD(P)-binding Rossmann-fold superfamily protein         |     |
| Pc_TC014575 | -0.43 | 0.3   |      | -1.22 | 0.02      | Down |  | 1.22  | 0.17      |      |  | 0.59  | 0.28  |      | unknown protein                                          |     |
| Pc_TC014581 | 0.48  | 0.11  |      | 0.83  | 0.03      |      |  | -3.4  | 0         | Down |  | -2.15 | ##### | Down | Dehydrin family protein                                  |     |
| Pc_TC014586 | -2.97 | 0.01  | Down | -3.4  | 0.01      | Down |  | -5.54 | 0         | Down |  | -2.83 | 0.02  | Down | ADP/ATP carrier 3                                        |     |
| Pc_TC014588 | 0.71  | 0.09  |      | 0.87  | 0.1       |      |  | -2.11 | 0.04      | Down |  | -1.45 | 0.02  | Down | Expressed protein                                        |     |
| Pc_TC014589 | 0.79  | 0.16  |      | 1.47  | 0.02      | Up   |  | -0.49 | 0.66      |      |  | 0.61  | 0.39  |      | glutathione S-transferase TAU 18                         |     |
| Pc_TC014596 | -5.21 | 0     | Down | 0     | 0         |      |  | 0     | 0         |      |  | -3.66 | 0     | Down | Ribosomal protein S3Ae                                   |     |
| Pc_TC014599 | -2.51 | 0.05  | Down | -1.53 | 0.22      |      |  | -0.08 | 0.98      |      |  | -1.15 | 0.31  |      | Expressed protein                                        |     |
| Pc_TC014601 | -0.24 | 0.87  |      | 1.13  | 0.25      |      |  | -3.23 | 0.07      |      |  | -3.11 | 0.03  | Down | Hemolymph juvenile hormone binding protein               |     |
| Pc_TC014602 | 2.96  | ##### | Up   | 0     | 7.81E-006 |      |  | 1.96  | 0.07      |      |  | 1.32  | 0.08  |      | Expressed protein                                        |     |
| Pc_TC014611 | 2.19  | 0     | Up   | 0     | 0         |      |  | 1.84  | 0.12      |      |  | -1.54 | 0.17  |      | beta glucosidase 43                                      |     |
| Pc_TC014621 | 0.37  | 0.29  |      | 1.04  | 0.02      | Up   |  | -0.7  | 0.42      |      |  | 0.74  | 0.16  |      | Leucine-rich repeat transmembrane protein kinase         |     |
| Pc_TC014627 | -0.9  | 0.25  |      | -1.97 | 0.04      | Down |  | 0.9   | 0.42      |      |  | 0.49  | 0.54  |      | Expressed protein                                        |     |
| Pc_TC014628 | -1.82 | 0.03  | Down | -1.36 | 0.15      |      |  | 1.31  | 0.24      |      |  | 0.43  | 0.6   |      | Expressed protein                                        |     |
| Pc_TC014641 | -1.66 | 0.18  |      | -0.68 | 0.6       |      |  | 2.57  | 0.03      | Up   |  | 1.41  | 0.13  |      | Zinc finger C-x8-C-x5-C-x3-H type family protein         | C3H |
| Pc_TC014642 | -1.43 | ##### | Down | -1.25 | 0         | Down |  | -0.4  | 0.62      |      |  | -1.09 | 0.03  | Down | Glycosyl transferase, family 35                          |     |
| Pc_TC014649 | -1.73 | 0.16  |      | -3.33 | 0.04      | Down |  | 0.2   | 0.91      |      |  | 0.19  | 0.9   |      | Expressed protein                                        |     |
| Pc_TC014671 | 2.24  | 0     | Up   | 0     | 9.94E-005 |      |  | 1.35  | 0.23      |      |  | -0.59 | 0.53  |      | Expressed protein                                        |     |
| Pc_TC014681 | -0.68 | 0.29  |      | -2.09 | 0.01      | Down |  | 1.49  | 0.15      |      |  | 0.58  | 0.41  |      | CVP2 like 1                                              |     |
| Pc_TC014684 | 4.69  | ##### | Up   | 0     | 0.36      |      |  | 4.26  | 0         | Up   |  | 1.21  | 0.5   |      | Expressed protein                                        |     |
| Pc_TC014696 | -0.07 | 0.98  |      | 0.53  | 0.58      |      |  | -3.45 | 0.03      | Down |  | -1.16 | 0.27  |      | Serine proteinase-like protein                           |     |
| Pc_TC014698 | 3.76  | ##### | Up   | 0     | 0.2       |      |  | 2.87  | 0.05      | Up   |  | 1.56  | 0.25  |      | Expressed protein                                        |     |
| Pc_TC014708 | 0.37  | 0.61  |      | 0.24  | 0.78      |      |  | 2.1   | 0.05      |      |  | 2.14  | 0     | Up   | Expressed protein                                        |     |
| Pc_TC014728 | 2.68  | 0     | Up   | 0     | 0.02      |      |  | 1.48  | 0.26      |      |  | 1.65  | 0.09  |      | Expressed protein                                        |     |
| Pc_TC014731 | 0.18  | 0.84  |      | 0.64  | 0.46      |      |  | -3.57 | 0.02      | Down |  | -1.18 | 0.22  |      | ARM-repeat/Tetratricopeptide repeat (TPR)-like protein   |     |
| Pc_TC014741 | 0.31  | 0.54  |      | 0.31  | 0.62      |      |  | -1.95 | 0.07      |      |  | -2.56 | 0     | Down | Heavy metal transport/detoxification superfamily protein |     |
| Pc_TC014744 | 3.11  | 0     | Up   | 0     | 0.2       |      |  | 4.25  | 0         | Up   |  | 1.21  | 0.41  |      | 3-phosphoserine phosphatase                              |     |
| Pc_TC014745 | -2.24 | 0.01  | Down | 0.84  | 0.3       |      |  | -1.97 | 0.13      |      |  | -2.56 | 0.01  | Down | Expressed protein                                        |     |
| Pc_TC014757 | 0.71  | 0.01  |      | 0.99  | 0.01      |      |  | -5.79 | 7.72E-009 | Down |  | -2.72 | ##### | Down | HVA22 homologue E                                        |     |

|             |       |       |      |       |      |      |       |           |      |       |       |      |                                                                          |     |
|-------------|-------|-------|------|-------|------|------|-------|-----------|------|-------|-------|------|--------------------------------------------------------------------------|-----|
| Pc_TC014759 | -1.32 | 0.03  | Down | -1.62 | 0.03 | Down | 0.84  | 0.4       |      | 0.5   | 0.45  |      | UDP-glucosyl transferase 88A1                                            |     |
| Pc_TC014771 | 0.83  | 0.14  |      | 1.75  | 0.01 | Up   | 0.46  | 0.66      |      | 1.01  | 0.14  |      | cinnamate-4-hydroxylase                                                  |     |
| Pc_TC014774 | 0.68  | 0.4   |      | -0.57 | 0.6  |      | 2     | 0.08      |      | 1.91  | 0.02  | Up   | FtsJ-like methyltransferase family protein                               |     |
| Pc_TC014801 | 3.14  | ##### | Up   | 0     | 0.02 |      | 2.27  | 0.07      |      | 1.45  | 0.15  |      | Cytochrome C1 family                                                     |     |
| Pc_TC014802 | -1.51 | 0.16  |      | -3.7  | 0.01 | Down | -0.67 | 0.64      |      | -0.49 | 0.66  |      | Expressed protein                                                        |     |
| Pc_TC014826 | 0.95  | 0     |      | 1.43  | 0    | Up   | -2.11 | 0.02      | Down | 0.34  | 0.51  |      | B12D protein                                                             |     |
| Pc_TC014834 | -2.9  | 0     | Down | -1.72 | 0.05 |      | 0.41  | 0.72      |      | 0.02  | 0.99  |      | Protein of unknown function (DUF3414)                                    |     |
| Pc_TC014848 | -1.9  | 0.02  | Down | -0.82 | 0.36 |      | -1.21 | 0.32      |      | -0.42 | 0.63  |      | Expressed protein                                                        |     |
| Pc_TC014849 | 0.32  | 0.86  |      | 2.33  | 0.02 | Up   | -1.96 | 0.32      |      | -0.13 | 0.99  |      | Glutathione S-transferase                                                |     |
| Pc_TC014850 | 0.46  | 0.19  |      | 0.65  | 0.14 |      | -2.06 | 0.03      | Down | -1.69 | 0     | Down | trehalase 1                                                              |     |
| Pc_TC014852 | -2.62 | 0.03  | Down | -2.06 | 0.11 |      | -0.44 | 0.76      |      | -1.27 | 0.26  |      | Expressed protein                                                        |     |
| Pc_TC014855 | -0.9  | 0.07  |      | 1.12  | 0.03 | Up   | -0.99 | 0.32      |      | -0.96 | 0.13  |      | S-adenosyl-L-methionine-dependent methyltransferases superfamily protein |     |
| Pc_TC014857 | -3.88 | 0     | Down | -1.31 | 0.24 |      | 1.25  | 0.3       |      | -0.52 | 0.62  |      | Uncharacterized protein                                                  |     |
| Pc_TC014860 | 2.66  | 0.12  |      | 4.73  | 0    | Up   | 0.5   | 1         |      | 1.63  | 0.49  |      | Expressed protein                                                        |     |
| Pc_TC014894 | -1.18 | 0.23  |      | -2.57 | 0.04 | Down | -0.06 | 0.99      |      | -0.69 | 0.51  |      | Expressed protein                                                        |     |
| Pc_TC014919 | 1.63  | 0.03  | Up   | 0     | 0    |      | 0.14  | 0.94      |      | -0.61 | 0.58  |      | Expressed protein                                                        |     |
| Pc_TC014920 | 2.47  | 0.01  | Up   | 0     | 0.11 |      | -0.5  | 0.85      |      | -0.79 | 0.69  |      | Uncharacterized protein                                                  |     |
| Pc_TC014931 | 0.27  | 0.76  |      | 1.02  | 0.23 |      | -4.08 | 0.01      | Down | -2.96 | 0.01  | Down | Expressed protein                                                        |     |
| Pc_TC014936 | 2.11  | 0     | Up   | 0     | 0    |      | 2.41  | 0.04      | Up   | 0.21  | 0.87  |      | Expressed protein                                                        |     |
| Pc_TC014938 | -0.11 | 0.89  |      | 1.19  | 0.09 |      | -4.84 | 0         | Down | -4.71 | ##### | Down | UniRef100                                                                |     |
| Pc_TC014939 | 0.83  | 0.03  |      | 1.04  | 0.03 | Up   | -1.16 | 0.22      |      | -0.16 | 0.78  |      | Late embryogenesis abundant protein,group 2                              |     |
| Pc_TC014946 | -0.64 | 0.14  |      | 0.29  | 0.58 |      | 3.4   | 0         | Up   | 2.17  | ##### | Up   | CLIP-associated protein                                                  |     |
| Pc_TC014949 | -1.21 | 0.13  |      | -2.75 | 0.01 | Down | 0.12  | 0.93      |      | 0.03  | 1     |      | Expressed protein                                                        |     |
| Pc_TC014951 | 0.37  | 0.85  |      | 2.5   | 0.02 | Up   | -3.67 | 0.15      |      | 0     | 0.04  |      | Expressed protein                                                        |     |
| Pc_TC014960 | 1.98  | 0.02  | Up   | 0     | 0.02 |      | 1.83  | 0.16      |      | -0.47 | 0.74  |      | Expressed protein                                                        |     |
| Pc_TC014965 | 0.89  | 0.12  |      | 1.65  | 0.01 | Up   | -2.86 | 0.02      | Down | -0.49 | 0.52  |      | Uncharacterized protein                                                  |     |
| Pc_TC014968 | 1.51  | 0.05  | Up   | 0     | 0    |      | 1.73  | 0.15      |      | -0.62 | 0.58  |      | Expressed protein                                                        |     |
| Pc_TC014969 | -0.11 | 0.9   |      | -4.75 | 0    | Down | -1.09 | 0.37      |      | 0.74  | 0.35  |      | Expressed protein                                                        |     |
| Pc_TC014976 | 1.3   | 0.35  |      | -0.53 | 0.89 |      | 4.23  | 0         | Up   | 3.4   | 0     | Up   | Expressed protein                                                        |     |
| Pc_TC014995 | 0.53  | 0.28  |      | -0.35 | 0.58 |      | 1.24  | 0.2       |      | 1.34  | 0.03  | Up   | Expressed protein                                                        |     |
| Pc_TC015005 | 1.89  | 0.01  | Up   | 0     | 0    |      | 1.57  | 0.18      |      | -0.28 | 0.8   |      | Putative uncharacterized protein                                         |     |
| Pc_TC015011 | 1.43  | 0.01  | Up   | 1     | 0.16 |      | -0.96 | 0.4       |      | 0.74  | 0.32  |      | Expressed protein                                                        |     |
| Pc_TC015017 | 1.55  | 0.04  | Up   | 0     | 0    |      | 1.71  | 0.15      |      | 1.21  | 0.18  |      | Expressed protein                                                        |     |
| Pc_TC015019 | 3.21  | ##### | Up   | 0     | 0.02 |      | 2.38  | 0.06      |      | 0.24  | 0.88  |      | Expressed protein                                                        |     |
| Pc_TC015021 | 1.04  | 0.1   |      | 1.72  | 0.01 | Up   | -0.17 | 0.89      |      | -0.05 | 0.97  |      | ETHYLENE-INSENSITIVE3-like 3                                             | EIL |
| Pc_TC015022 | -0.92 | 1     |      | 0     | 0.67 |      | 3.41  | 0.07      |      | 3.58  | 0.02  | Up   | Expressed protein                                                        |     |
| Pc_TC015024 | 1.54  | 0.18  |      | -0.94 | 0.67 |      | 3.1   | 0.02      | Up   | 1.43  | 0.25  |      | Galactose oxidase/kelch repeat superfamily protein                       |     |
| Pc_TC015028 | 0     | 0     |      | -3.85 | 0.01 | Down | 2.59  | 0.02      | Up   | -0.19 | 0.87  |      | Expressed protein                                                        |     |
| Pc_TC015029 | 0.65  | 0.38  |      | 1.68  | 0.03 | Up   | -3.53 | 0.02      | Down | -0.09 | 0.95  |      | Expressed protein                                                        |     |
| Pc_TC015041 | 0.37  | 0.26  |      | 0.45  | 0.28 |      | -1.57 | 0.07      |      | -1.1  | 0.04  | Down | BAX inhibitor 1                                                          |     |
| Pc_TC015056 | -2.93 | ##### | Down | -1.07 | 0.11 |      | -0.09 | 0.93      |      | -1.39 | 0.05  | Down | Expressed protein                                                        |     |
| Pc_TC015065 | 0.21  | 0.68  |      | 1.07  | 0.07 |      | -8.48 | 2.53E-007 | Down | -2.74 | 0     | Down | seed gene 1                                                              |     |
| Pc_TC015067 | 3.08  | 0.05  | Up   | 2.52  | 0.2  |      | 1.5   | 0.6       |      | 2.87  | 0.09  |      | Expressed protein                                                        |     |
| Pc_TC015078 | 0.73  | 0.19  |      | 1.28  | 0.04 | Up   | -1.22 | 0.27      |      | -0.3  | 0.68  |      | Eukaryotic aspartyl protease family protein                              |     |
| Pc_TC015104 | -2.51 | 0.05  | Down | -0.36 | 0.78 |      | 2.2   | 0.06      |      | 0.63  | 0.53  |      | Expressed protein                                                        |     |
| Pc_TC015116 | 0.61  | 0.55  |      | 0.59  | 0.61 |      | 0.79  | 0.57      |      | 2.07  | 0.02  | Up   | Expressed protein                                                        |     |
| Pc_TC015124 | -0.29 | 0.74  |      | 0.53  | 0.54 |      | -4.37 | 0.01      | Down | -0.7  | 0.45  |      | Expressed protein                                                        |     |
| Pc_TC015126 | 0.14  | 0.88  |      | 1.16  | 0.15 |      | -5.92 | 0         | Down | -1.71 | 0.08  |      | Expressed protein                                                        |     |
| Pc_TC015142 | 0.81  | 0.27  |      | 1.67  | 0.03 | Up   | -2.53 | 0.07      |      | -0.15 | 0.89  |      | Putative uncharacterized protein                                         |     |
| Pc_TC015144 | 0.12  | 0.79  |      | 0.4   | 0.45 |      | -1.47 | 0.14      |      | -1.31 | 0.04  | Down | calcineurin B-like 3                                                     |     |
| Pc_TC015149 | 2.25  | 0.03  | Up   | -2.94 | 0.25 |      | 0.59  | 0.77      |      | 0.33  | 0.89  |      | eukaryotic release factor 1-1                                            |     |
| Pc_TC015153 | 3.03  | 0.01  | Up   | 0     | 0.36 |      | 1.5   | 0.45      |      | -0.79 | 0.84  |      | Expressed protein                                                        |     |
| Pc_TC015157 | 0.65  | 0.37  |      | 0.61  | 0.47 |      | 1.68  | 0.13      |      | 1.67  | 0.03  | Up   | Expressed protein                                                        |     |
| Pc_TC015159 | 3.33  | 0.03  | Up   | 0     | 0.67 |      | 2.09  | 0.38      |      | 0.63  | 0.96  |      | Peptidase M28 family protein                                             |     |
| Pc_TC015170 | 1.05  | 0.11  |      | 1.06  | 0.17 |      | -1.09 | 0.37      |      | 2.61  | 0     | Up   | Putative copia-like retroelement                                         |     |
| Pc_TC015177 | 0.26  | 0.82  |      | 0.12  | 0.95 |      | 2.6   | 0.03      | Up   | 1.14  | 0.22  |      | Cellular retinaldehyde-binding protein                                   |     |
| Pc_TC015187 | 1.4   | 0.61  |      | 1.06  | 0.8  |      | 2.67  | 0.2       |      | 4.05  | 0     | Up   | Expressed protein                                                        |     |
| Pc_TC015189 | 1.25  | 0.07  |      | 1.94  | 0.01 | Up   | -2.22 | 0.1       |      | -1.28 | 0.19  |      | Expressed protein                                                        |     |
| Pc_TC015209 | -3.83 | 0.04  | Down | 1.01  | 0.36 |      | 0     | 0.02      |      | 0     | 0.01  |      | Expressed protein                                                        |     |
| Pc_TC015217 | 0.76  | 0.71  |      | 2.74  | 0.03 | Up   | 0.77  | 0.74      |      | -0.11 | 1     |      | Expressed protein                                                        |     |
| Pc_TC015223 | 0     | 1     |      | 0     | 1    |      | 7.11  | 2.41E-005 | Up   | 0     | 0.9   |      | ADP/ATP carrier 3                                                        |     |
| Pc_TC015225 | 0.05  | 0.85  |      | 0.14  | 0.71 |      | -1.49 | 0.08      |      | -1.49 | 0     | Down | unknown protein                                                          |     |



|             |       |       |      |       |           |      |       |           |      |       |       |      |                                                                          |             |
|-------------|-------|-------|------|-------|-----------|------|-------|-----------|------|-------|-------|------|--------------------------------------------------------------------------|-------------|
| Pc_TC015243 | 2.04  | ##### | Up   | 0     | 2.20E-009 |      | 1.47  | 0.15      |      | 0.78  | 0.25  |      | phosphate transporter 3;1                                                |             |
| Pc_TC015244 | 1.27  | 0.02  | Up   | 0     | 2.38E-009 |      | 1.51  | 0.14      |      | 0.01  | 1     |      | Leucine-rich repeat (LRR) family protein                                 |             |
| Pc_TC015249 | 0.1   | 0.91  |      | -2.07 | 0.03      | Down | 1.61  | 0.13      |      | 1.41  | 0.05  |      | Expressed protein                                                        |             |
| Pc_TC015255 | -3.68 | 0.01  | Down | -3.7  | 0.01      | Down | -0.44 | 0.76      |      | -1.54 | 0.17  |      | Expressed protein                                                        |             |
| Pc_TC015263 | -0.79 | 0.14  |      | -1.73 | 0.01      | Down | 2.03  | 0.03      | Up   | 0.87  | 0.16  |      | Expressed protein                                                        |             |
| Pc_TC015277 | 0.24  | 0.41  |      | 0.53  | 0.16      |      | -4.71 | 7.23E-007 | Down | -2.34 | ##### | Down | Expressed protein                                                        |             |
| Pc_TC015291 | 1.43  | 0.01  | Up   | 2.07  | 0         | Up   | 0.34  | 0.75      |      | 1.03  | 0.12  |      | Expressed protein                                                        |             |
| Pc_TC015298 | -0.9  | 0.03  |      | -1.77 | 0         | Down | 1.79  | 0.04      | Up   | 0.5   | 0.36  |      | Glucose-6-phosphate/phosphate translocator-related                       |             |
| Pc_TC015299 | -3.09 | 0.04  | Down | -1.53 | 0.28      |      | 0.5   | 0.74      |      | -0.46 | 0.73  |      | Uncharacterized protein                                                  |             |
| Pc_TC015302 | 4.6   | 0     | Up   | 4.7   | 0.01      | Up   | 0     | 0.87      |      | 2.43  | 0.39  |      | Homeodomain-like superfamily protein                                     | MYB-related |
| Pc_TC015306 | 0.78  | 0.44  |      | 2.12  | 0.02      | Up   | -0.1  | 0.99      |      | -0.37 | 0.8   |      | Expressed protein                                                        |             |
| Pc_TC015309 | 2.62  | ##### | Up   | 0     | 0         |      | 1.96  | 0.09      |      | 0.28  | 0.78  |      | NAD(P)-binding Rossmann-fold superfamily protein                         |             |
| Pc_TC015313 | 0.38  | 0.49  |      | 0.77  | 0.22      |      | -4.4  | 0         | Down | -2.69 | 0     | Down | PEBP (phosphatidylethanolamine-binding protein) family protein           |             |
| Pc_TC015316 | -3.83 | 0     | Down | -2.04 | 0.09      |      | 0.38  | 0.78      |      | -1.28 | 0.23  |      | Expressed protein                                                        |             |
| Pc_TC015340 | -1.07 | 0.01  | Down | -1.29 | 0.01      | Down | 1.51  | 0.08      |      | 0.75  | 0.16  |      | nucleolin like 2                                                         |             |
| Pc_TC015346 | 2.08  | 0.3   |      | 5.31  | 1.62E-005 | Up   | 0.5   | 1         |      | 2.21  | 0.26  |      | Expressed protein                                                        |             |
| Pc_TC015354 | 2.08  | 0.04  | Up   | 0     | 0.11      |      | 2.88  | 0.04      | Up   | 1.63  | 0.17  |      | Leucine-rich repeat (LRR) family protein                                 |             |
| Pc_TC015358 | 0.54  | 0.25  |      | 2.17  | 3.22E-005 | Up   | -3.39 | 0         | Down | -1.86 | 0.01  | Down | Adenine nucleotide alpha hydrolases-like superfamily protein             |             |
| Pc_TC015367 | -0.01 | 0.99  |      | -0.7  | 0.2       |      | 1.79  | 0.04      | Up   | 1.15  | 0.04  | Up   | S-adenosyl-L-methionine-dependent methyltransferases superfamily protein |             |
| Pc_TC015380 | -0.05 | 1     |      | -0.07 | 0.99      |      | -3.44 | 0.05      | Down | -1.9  | 0.12  |      | Uncharacterized protein                                                  |             |
| Pc_TC015393 | 0.52  | 0.32  |      | 1.09  | 0.07      |      | -3.73 | 0         | Down | -2.2  | 0     | Down | Protein phosphatase 2C family protein                                    |             |
| Pc_TC015400 | 0.21  | 0.79  |      | 1.19  | 0.12      |      | -4.17 | 0.01      | Down | -1.65 | 0.08  |      | Expressed protein                                                        |             |
| Pc_TC015412 | 3.02  | 0.02  | Up   | 0     | 0.48      |      | 1.62  | 0.46      |      | 1.21  | 0.58  |      | Expressed protein                                                        |             |
| Pc_TC015419 | 0.12  | 0.92  |      | 0.55  | 0.54      |      | -3.2  | 0.03      | Down | -1.2  | 0.22  |      | Expressed protein                                                        |             |
| Pc_TC015421 | 0     | 0.04  |      | -0.59 | 0.75      |      | 3.2   | 0.01      | Up   | 0.97  | 0.42  |      | Expressed protein                                                        |             |
| Pc_TC015432 | -0.39 | 0.7   |      | 0.49  | 0.63      |      | -4.35 | 0.01      | Down | -1.53 | 0.16  |      | protein,putative,unclassified                                            |             |
| Pc_TC015434 | 1.08  | 0.77  |      | 1.64  | 0.53      |      | 5.46  | 0         | Up   | 2.43  | 0.19  |      | Expressed protein                                                        |             |
| Pc_TC015442 | -0.01 | 1     |      | 1.87  | 0.05      |      | -2.91 | 0.12      |      | -4.37 | 0.02  | Down | Expressed protein                                                        |             |
| Pc_TC015455 | 1.19  | 0.13  |      | -0.32 | 0.8       |      | 2.6   | 0.02      | Up   | 2.12  | 0.01  | Up   | O-Glycosyl hydrolases family 17 protein                                  |             |
| Pc_TC015468 | 0.62  | 0.26  |      | 1.39  | 0.03      | Up   | -3.6  | 0         | Down | -1.19 | 0.11  |      | Expressed protein                                                        |             |
| Pc_TC015469 | 0.26  | 0.37  |      | 1.04  | 0         | Up   | -2.68 | 0         | Down | -0.67 | 0.17  |      | pleiotropic drug resistance 12                                           |             |
| Pc_TC015472 | 2.89  | 0.03  | Up   | 2.47  | 0.12      |      | 0.92  | 0.76      |      | 2.5   | 0.1   |      | Expressed protein                                                        |             |
| Pc_TC015480 | -0.37 | 0.72  |      | -0.85 | 0.44      |      | -3.82 | 0.02      | Down | -2.7  | 0.03  | Down | Expressed protein                                                        |             |
| Pc_TC015490 | 0.34  | 0.66  |      | 1.14  | 0.16      |      | -3.18 | 0.03      | Down | -1.87 | 0.06  |      | Uncharacterized protein                                                  |             |
| Pc_TC015498 | 2.41  | ##### | Up   | -3.64 | 0         | Down | 1.69  | 0.11      |      | -0.17 | 0.84  |      | polyubiquitin 3                                                          |             |
| Pc_TC015504 | -1.73 | 0.02  | Down | -1.53 | 0.06      |      | 1.06  | 0.31      |      | 0.75  | 0.29  |      | Expressed protein                                                        |             |
| Pc_TC015506 | 1.69  | 0.01  | Up   | 1.46  | 0.07      |      | -1.82 | 0.18      |      | -0.2  | 0.84  |      | Expressed protein                                                        |             |
| Pc_TC015507 | 1.66  | 0.04  | Up   | 0     | 0.01      |      | 1.13  | 0.38      |      | -0.6  | 0.62  |      | Aldolase superfamily protein                                             |             |
| Pc_TC015509 | 1.99  | 0.02  | Up   | 0     | 0.03      |      | 1.26  | 0.37      |      | -0.49 | 0.75  |      | Expressed protein                                                        |             |
| Pc_TC015510 | -0.38 | 0.27  |      | -0.94 | 0.04      |      | 1.73  | 0.04      | Up   | 0.99  | 0.05  |      | Chlorophyll A-B binding family protein                                   |             |
| Pc_TC015512 | 3.25  | 0     | Up   | 0     | 0.36      |      | 3.06  | 0.05      |      | 0.95  | 0.64  |      | Expressed protein                                                        |             |
| Pc_TC015515 | 0.9   | 0.12  |      | 0.97  | 0.16      |      | -2.4  | 0.05      | Down | -0.69 | 0.37  |      | Os08g0398800 protein                                                     |             |
| Pc_TC015520 | -0.09 | 0.81  |      | 0.21  | 0.66      |      | -3.28 | 0         | Down | -2.43 | ##### | Down | ferric reductase-like transmembrane component family protein             |             |
| Pc_TC015532 | 1.44  | 0.24  |      | 1.5   | 0.27      |      | 3.79  | 0         | Up   | 2.95  | 0.01  | Up   | TPX2 (targeting protein for Xklp2) protein family                        |             |
| Pc_TC015536 | 1.81  | ##### | Up   | 0     | 2.20E-017 |      | 1.39  | 0.13      |      | 0.96  | 0.1   |      | Expressed protein                                                        |             |
| Pc_TC015545 | 1.9   | 0     | Up   | 0     | 1.57E-008 |      | 1.68  | 0.1       |      | -0.37 | 0.62  |      | Ribosome associated membrane protein RAMP4                               |             |
| Pc_TC015552 | 1.36  | 0.06  |      | -0.12 | 0.94      |      | -4.04 | 0.01      | Down | -0.6  | 0.55  |      | Putative uncharacterized protein OSJNBb0089F16.20                        |             |
| Pc_TC015557 | -4.2  | ##### | Down | -1.37 | 0.09      |      | 1.15  | 0.27      |      | -1.73 | 0.04  | Down | Uncharacterized protein                                                  |             |
| Pc_TC015558 | 0     | 1     |      | -0.19 | 0.77      |      | 2.48  | 0.01      | Up   | 1.19  | 0.06  |      | COBRA-like protein 1 precursor                                           |             |
| Pc_TC015566 | 1.03  | 0.1   |      | -0.04 | 0.98      |      | 2.4   | 0.02      | Up   | 1.73  | 0.02  | Up   | Expressed protein                                                        |             |
| Pc_TC015578 | 3.37  | ##### | Up   | 0     | 0.01      |      | 3.58  | 0         | Up   | 1.72  | 0.06  |      | Uncharacterized protein                                                  |             |
| Pc_TC015591 | 2.22  | ##### | Up   | 0     | 4.58E-015 |      | 1.86  | 0.05      | Up   | 1.47  | 0.01  | Up   | Expressed protein                                                        |             |
| Pc_TC015592 | -3.34 | 0.01  | Down | 0.84  | 0.35      |      | 0.18  | 0.91      |      | 0.69  | 0.44  |      | Expressed protein                                                        |             |
| Pc_TC015597 | 2.21  | 0     | Up   | 0     | 0.01      |      | 1.91  | 0.12      |      | -0.12 | 0.95  |      | Expressed protein                                                        |             |
| Pc_TC015598 | -0.74 | 0.08  |      | -1.14 | 0.04      | Down | 2.37  | 0.01      | Up   | 1.72  | 0     | Up   | fatty acid desaturase 8                                                  |             |
| Pc_TC015603 | -0.35 | 0.72  |      | -0.44 | 0.69      |      | -3.45 | 0.03      | Down | -0.52 | 0.62  |      | OSJNBb0060E08.12 protein                                                 |             |
| Pc_TC015626 | 0.51  | 0.19  |      | -0.2  | 0.69      |      | 2.24  | 0.01      | Up   | 0.61  | 0.27  |      | phosphoenolpyruvate carboxykinase 1                                      |             |
| Pc_TC015629 | -0.72 | 0.35  |      | 0.5   | 0.54      |      | -1.62 | 0.19      |      | -1.87 | 0.04  | Down | Uncharacterized protein                                                  |             |
| Pc_TC015638 | 0.66  | 0.07  |      | 1.17  | 0.01      | Up   | -3.47 | 0         | Down | -1.76 | 0     | Down | P-loop containing nucleoside triphosphate hydrolases superfamily protein |             |
| Pc_TC015642 | -4.45 | 0     | Down | 0.03  | 1         |      | 0.19  | 0.89      |      | -0.02 | 1     |      | beta-galactosidase 3                                                     |             |
| Pc_TC015667 | 1.15  | 0.13  |      | 0.27  | 0.8       |      | -0.06 | 0.99      |      | 1.92  | 0.02  | Up   | Putative polyprotein                                                     |             |
| Pc_TC015680 | 0.49  | 0.23  |      | 1.49  | 0         | Up   | -1.76 | 0.07      |      | -0.94 | 0.12  |      | Uncharacterized protein                                                  |             |

|             |       |       |      |       |           |      |       |           |      |       |       |      |                                                                |      |
|-------------|-------|-------|------|-------|-----------|------|-------|-----------|------|-------|-------|------|----------------------------------------------------------------|------|
| Pc_TC015696 | -1.62 | 0.08  |      | -2.23 | 0.05      | Down | -1.97 | 0.15      |      | -1.96 | 0.06  |      | Expressed protein                                              |      |
| Pc_TC015702 | 1.38  | 0.15  |      | 2.22  | 0.02      | Up   | 0     | 0.03      |      | 0     | 0.01  |      | Expressed protein                                              |      |
| Pc_TC015711 | 6.66  | ##### | Up   | 0     | 0.02      |      | 1.09  | 0.44      |      | 0.14  | 0.96  |      | Expressed protein                                              |      |
| Pc_TC015713 | 1.08  | 0.57  |      | 0.38  | 0.97      |      | 3.88  | 0.01      | Up   | 2.38  | 0.08  |      | Expressed protein                                              |      |
| Pc_TC015719 | 1.13  | 0.02  | Up   | 1.53  | 0.01      | Up   | 1     | 0.32      |      | 2.45  | ##### | Up   | PHE ammonia lyase 1                                            |      |
| Pc_TC015720 | 3.21  | 0     | Up   | 0     | 0.36      |      | 1.96  | 0.27      |      | 1.63  | 0.31  |      | putative endo-1,3;1,4-beta-D-glucanase'                        |      |
| Pc_TC015725 | -1.44 | 0.11  |      | -5.37 | 0         | Down | 3.78  | 0         | Up   | 2.01  | 0.01  | Up   | O-methyltransferase family protein                             |      |
| Pc_TC015728 | -0.46 | 0.63  |      | -0.19 | 0.88      |      | -0.8  | 0.56      |      | -3.79 | 0     | Down | Uncharacterized protein                                        |      |
| Pc_TC015751 | 1.72  | 0.04  | Up   | 0     | 0.01      |      | 0.83  | 0.55      |      | -1.37 | 0.29  |      | calmodulin 6                                                   |      |
| Pc_TC015752 | -3.92 | 0.03  | Down | -1.36 | 0.36      |      | -0.69 | 0.68      |      | -1.05 | 0.43  |      | TTF-type zinc finger protein with HAT dimerisation domain      |      |
| Pc_TC015756 | 0.11  | 0.84  |      | 1.05  | 0.07      |      | -2.42 | 0.03      | Down | -2.03 | 0     | Down | Actin-binding FH2 (formin homology 2) family protein           |      |
| Pc_TC015772 | 2.19  | 0.05  |      | 2.72  | 0.02      | Up   | -0.5  | 0.89      |      | 0     | 0.11  |      | Putative uncharacterized protein                               |      |
| Pc_TC015777 | 0.59  | 0.31  |      | -1.57 | 0.05      | Down | -0.02 | 0.99      |      | -0.52 | 0.49  |      | Expressed protein                                              |      |
| Pc_TC015778 | 0     | 0.64  |      | 0.06  | 1         |      | 1.5   | 0.6       |      | 3.15  | 0.05  | Up   | Expressed protein                                              |      |
| Pc_TC015779 | -0.03 | 0.98  |      | 0.4   | 0.59      |      | -2.11 | 0.08      |      | -1.62 | 0.05  | Down | Argonate family protein                                        |      |
| Pc_TC015780 | -0.41 | 0.6   |      | 0.54  | 0.51      |      | -3.5  | 0.01      | Down | -0.97 | 0.27  |      | Expressed protein                                              |      |
| Pc_TC015781 | -0.03 | 1     |      | 0.95  | 0.22      |      | -3.5  | 0.01      | Down | -0.93 | 0.29  |      | Expressed protein                                              |      |
| Pc_TC015802 | -1.31 | 0.26  |      | -3.33 | 0.04      | Down | 1.32  | 0.3       |      | 0.23  | 0.86  |      | Os08g0174300 protein                                           |      |
| Pc_TC015811 | -0.03 | 1     |      | 0.34  | 0.75      |      | 2.65  | 0.02      | Up   | 1.46  | 0.09  |      | Expressed protein                                              |      |
| Pc_TC015818 | -0.06 | 0.88  |      | 0.52  | 0.29      |      | -2.28 | 0.02      | Down | -1.32 | 0.03  | Down | transcript elongation factor IIS                               | IWS1 |
| Pc_TC015828 | 1.8   | 0.05  | Up   | 0     | 0.03      |      | 1.2   | 0.4       |      | -0.91 | 0.54  |      | Expressed protein                                              |      |
| Pc_TC015852 | -0.18 | 0.72  |      | 0.33  | 0.57      |      | -1.93 | 0.06      |      | -1.94 | 0     | Down | Expressed protein                                              |      |
| Pc_TC015876 | 0.99  | 0.45  |      | 1.38  | 0.29      |      | 1.55  | 0.31      |      | 2.33  | 0.03  | Up   | Expressed protein                                              |      |
| Pc_TC015891 | -0.52 | 0.43  |      | -0.8  | 0.31      |      | 3.43  | 0         | Up   | 1.76  | 0.01  | Up   | Stress responsive A/B Barrel Domain                            |      |
| Pc_TC015892 | 2.09  | 0     | Up   | 0     | 0         |      | 1.35  | 0.27      |      | 0.34  | 0.75  |      | aldehyde dehydrogenase 6B2                                     |      |
| Pc_TC015902 | 2     | 0.04  | Up   | -0.26 | 0.94      |      | -0.12 | 1         |      | 0     | 1     |      | RING/U-box superfamily protein                                 |      |
| Pc_TC015929 | -0.02 | 1     |      | -2.04 | 0.04      | Down | 1.26  | 0.25      |      | 0.35  | 0.67  |      | Lactoylglutathione lyase / glyoxalase I family protein         |      |
| Pc_TC015930 | -1.3  | 0.05  |      | -0.45 | 0.55      |      | 2.08  | 0.04      | Up   | 1.49  | 0.03  | Up   | DNA glycosylase superfamily protein                            |      |
| Pc_TC015931 | -0.51 | 0.62  |      | 1.21  | 0.18      |      | -3.25 | 0.05      | Down | -2.54 | 0.04  | Down | Expressed protein                                              |      |
| Pc_TC015937 | 2.78  | 0.02  | Up   | 0     | 0.36      |      | 1.9   | 0.3       |      | 0.43  | 0.93  |      | Expressed protein                                              |      |
| Pc_TC015938 | 0.46  | 0.66  |      | 2.29  | 0.01      | Up   | -0.17 | 0.93      |      | -0.89 | 0.46  |      | Expressed protein                                              |      |
| Pc_TC015941 | 0.92  | 0.16  |      | -1.28 | 0.16      |      | 4.79  | 4.59E-006 | Up   | 1.38  | 0.06  |      | Expressed protein                                              |      |
| Pc_TC015957 | 0.26  | 0.62  |      | 1.27  | 0.03      | Up   | -0.72 | 0.49      |      | -0.27 | 0.69  |      | cytochrome P450, family 96, subfamily A, polypeptide 10        |      |
| Pc_TC015960 | 1.72  | 0     | Up   | 0     | 4.35E-008 |      | 1.06  | 0.31      |      | -0.14 | 0.86  |      | Expressed protein                                              |      |
| Pc_TC015961 | -1.51 | 0.06  |      | -1.6  | 0.09      |      | 2.49  | 0.02      | Up   | 1.08  | 0.16  |      | Inositol monophosphatase family protein                        |      |
| Pc_TC015975 | 0.57  | 0.51  |      | 0.86  | 0.36      |      | -4.25 | 0.02      | Down | -3.13 | 0.02  | Down | Expressed protein                                              |      |
| Pc_TC015977 | -0.25 | 0.73  |      | 0.16  | 0.85      |      | -3.99 | 0         | Down | -2.68 | 0     | Down | Peptidoglycan-recognition protein-5                            |      |
| Pc_TC015991 | -0.43 | 0.36  |      | -1.25 | 0.04      | Down | 1.42  | 0.12      |      | 0.86  | 0.14  |      | kinesin 1                                                      |      |
| Pc_TC015994 | -1.27 | 0.01  | Down | -0.9  | 0.14      |      | 0.1   | 0.92      |      | -0.79 | 0.22  |      | multidrug resistance-associated protein 6                      |      |
| Pc_TC015998 | 0     | 0.64  |      | 1.38  | 0.65      |      | 4.2   | 0.01      | Up   | 2.43  | 0.19  |      | Expressed protein                                              |      |
| Pc_TC015999 | 0.08  | 1     |      | 0.06  | 1         |      | 3.67  | 0.04      | Up   | 3.08  | 0.06  |      | extensin-like protein                                          |      |
| Pc_TC016022 | 3.08  | 0.01  | Up   | 0     | 0.36      |      | 2.41  | 0.15      |      | -1.37 | 0.66  |      | Uncharacterized protein                                        |      |
| Pc_TC016025 | -1.31 | 0.08  |      | -1.89 | 0.03      | Down | -0.27 | 0.82      |      | -0.71 | 0.38  |      | Expressed protein                                              |      |
| Pc_TC016029 | 0.45  | 0.28  |      | 0.73  | 0.15      |      | -2.74 | 0.01      | Down | -1.41 | 0.02  | Down | Ryanodine receptor-like protein                                |      |
| Pc_TC016030 | 2.5   | 0.01  | Up   | 0     | 0.11      |      | 2.5   | 0.07      |      | -0.79 | 0.69  |      | Kazal-like serine protease inhibitor domain-containing protein |      |
| Pc_TC016040 | 1.33  | 0.07  |      | 2.39  | 0         | Up   | -2.17 | 0.13      |      | -0.42 | 0.69  |      | Uncharacterized protein                                        |      |
| Pc_TC016052 | 0.61  | 0.32  |      | 0.32  | 0.67      |      | -4.97 | 0         | Down | -1.15 | 0.16  |      | Uncharacterized protein                                        |      |
| Pc_TC016064 | 0.36  | 0.48  |      | 1.04  | 0.08      |      | -3.04 | 0.01      | Down | -2.68 | 0     | Down | Eukaryotic aspartyl protease family protein                    |      |
| Pc_TC016067 | -0.82 | 0.41  |      | 0.64  | 0.51      |      | 0     | 0         |      | -4.18 | 0     | Down | Uncharacterized protein                                        |      |
| Pc_TC016070 | -0.16 | 0.89  |      | 0.77  | 0.39      |      | 1.68  | 0.15      |      | 1.92  | 0.02  | Up   | Cyclin-dependent kinase inhibitor family protein               |      |
| Pc_TC016077 | 0.33  | 0.61  |      | 1.12  | 0.1       |      | -3.62 | 0.01      | Down | -1.96 | 0.02  | Down | OSBP(oxysterol binding protein)-related protein 3C             |      |
| Pc_TC016088 | 2.58  | 0.02  | Up   | 0     | 0.2       |      | 1.44  | 0.4       |      | 0.36  | 0.91  |      | Expressed protein                                              |      |
| Pc_TC016092 | 1.27  | 0.32  |      | 2.42  | 0.04      | Up   | -2.3  | 0.36      |      | -1.6  | 0.44  |      | Expressed protein                                              |      |
| Pc_TC016094 | 1.26  | 0.04  | Up   | 1.19  | 0.09      |      | 0.23  | 0.85      |      | 1.09  | 0.14  |      | Auxin-responsive GH3 family protein                            |      |
| Pc_TC016104 | 1.3   | 0.25  |      | 3.1   | 0         | Up   | -0.34 | 0.9       |      | -0.22 | 0.96  |      | 1-cysteine peroxiredoxin 1                                     |      |
| Pc_TC016107 | -0.4  | 0.25  |      | -1.1  | 0.02      | Down | 1.23  | 0.14      |      | 0.16  | 0.75  |      | Uncharacterized protein                                        |      |
| Pc_TC016137 | -1.37 | 0.02  | Down | -0.04 | 0.96      |      | 0.28  | 0.78      |      | 0.44  | 0.5   |      | Expressed protein                                              |      |
| Pc_TC016161 | -0.21 | 0.81  |      | -0.26 | 0.79      |      | 0     | 0         |      | -4.02 | 0     | Down | seed imbibition 2                                              |      |
| Pc_TC016168 | -0.62 | 0.37  |      | -0.56 | 0.49      |      | 2.69  | 0.01      | Up   | 0.99  | 0.17  |      | Expressed protein                                              |      |
| Pc_TC016169 | -0.57 | 0.44  |      | -0.38 | 0.66      |      | 0     | 5.13E-005 |      | -5.48 | ##### | Down | Expressed protein                                              |      |
| Pc_TC016177 | 0.54  | 0.63  |      | 1.76  | 0.07      |      | -4.5  | 0.04      | Down | -1.05 | 0.43  |      | Expressed protein                                              |      |
| Pc_TC016178 | 2.15  | 0.01  | Up   | 2.08  | 0.02      | Up   | -1.74 | 0.28      |      | 1.66  | 0.07  |      | jasmonate-zim-domain protein 10                                | Tify |

|             |       |       |      |       |           |      |       |           |      |       |       |      |                                                                                  |     |
|-------------|-------|-------|------|-------|-----------|------|-------|-----------|------|-------|-------|------|----------------------------------------------------------------------------------|-----|
| Pc_TC016180 | 0.26  | 0.57  |      | 0.16  | 0.78      |      | 1.14  | 0.22      |      | 1.39  | 0.02  | Up   | 2-oxoglutarate (2OG) and Fe(II)-dependent oxygenase superfamily protein          |     |
| Pc_TC016188 | 1.42  | 0.04  | Up   | 0     | 0         |      | 1.35  | 0.24      |      | 0.09  | 0.94  |      | Major facilitator superfamily protein                                            |     |
| Pc_TC016190 | -0.68 | 0.23  |      | -0.45 | 0.5       |      | 1.97  | 0.04      | Up   | 1     | 0.12  |      | Transducin/WD40 repeat-like superfamily protein                                  |     |
| Pc_TC016198 | 2.01  | 0.01  | Up   | 1.02  | 0.34      |      | -0.41 | 0.81      |      | 1.12  | 0.27  |      | Uncharacterized protein (Fragment)                                               |     |
| Pc_TC016210 | 2.03  | 0.05  |      | 2.42  | 0.03      | Up   | 1.63  | 0.28      |      | 1.38  | 0.27  |      | Expressed protein                                                                |     |
| Pc_TC016212 | -4.94 | ##### | Down | -2.63 | 0         | Down | -1.81 | 0.12      |      | -4.65 | ##### | Down | Expressed protein                                                                |     |
| Pc_TC016218 | 1.49  | 0.17  |      | 2.7   | 0.01      | Up   | 0.14  | 1         |      | 0.26  | 0.92  |      | Calcium-binding EF-hand family protein                                           |     |
| Pc_TC016231 | -4.88 | 0     | Down | -4.9  | 0         | Down | -0.2  | 0.9       |      | -1.52 | 0.16  |      | Expressed protein                                                                |     |
| Pc_TC016236 | 0.89  | 0.68  |      | -0.94 | 0.84      |      | 2.59  | 0.12      |      | 2.63  | 0.05  | Up   | OSJNBa0065017.7 protein                                                          |     |
| Pc_TC016237 | -0.02 | 1     |      | 1.23  | 0.06      |      | -3.68 | 0         | Down | -2.68 | 0     | Down | Expressed protein                                                                |     |
| Pc_TC016243 | 0.5   | 0.55  |      | 0.87  | 0.33      |      | -5.5  | 0         | Down | -0.25 | 0.83  |      | Expressed protein                                                                |     |
| Pc_TC016250 | 1.87  | 0.04  | Up   | 1.31  | 0.23      |      | 0.26  | 0.9       |      | 2.32  | 0.02  | Up   | Calcium-dependent lipid-binding (CaLB domain) family protein                     |     |
| Pc_TC016260 | 0.51  | 0.59  |      | 0.53  | 0.62      |      | -4.02 | 0.03      | Down | -1.31 | 0.26  |      | Expressed protein                                                                |     |
| Pc_TC016273 | 0.32  | 0.28  |      | 0.57  | 0.12      |      | -2.34 | 0.01      | Down | -1.33 | 0.01  | Down | glyceraldehyde-3-phosphate dehydrogenase C subunit 1                             |     |
| Pc_TC016277 | -0.06 | 1     |      | -0.15 | 0.94      |      | -0.96 | 0.52      |      | -2.83 | 0.04  | Down | SEC14 cytosolic factor family protein / phosphoglyceride transfer family protein |     |
| Pc_TC016285 | 6.09  | ##### | Up   | 0     | 0.2       |      | 0.92  | 0.64      |      | 0     | 0.11  |      | Glycosyl hydrolase family protein with chitinase insertion domain                |     |
| Pc_TC016292 | 1.82  | 0.29  |      | 0.8   | 0.82      |      | 3.73  | 0.02      | Up   | 1.36  | 0.5   |      | polyamine oxidase 1                                                              |     |
| Pc_TC016294 | 0.73  | 0.34  |      | 0.06  | 0.98      |      | 0.83  | 0.49      |      | 1.94  | 0.01  | Up   | Expressed protein                                                                |     |
| Pc_TC016307 | 1.47  | 0     | Up   | 1.28  | 0.03      | Up   | 1.52  | 0.12      |      | 1.17  | 0.06  |      | KH domain-containing protein / zinc finger (CCCH type) family protein            | C3H |
| Pc_TC016315 | 2.35  | 0.03  | Up   | 0     | 0.2       |      | 0.24  | 0.98      |      | -1.96 | 0.4   |      | 26S proteasome regulatory subunit S2 1B                                          |     |
| Pc_TC016316 | -0.21 | 0.68  |      | -0.38 | 0.54      |      | 2.58  | 0.01      | Up   | 1.7   | 0     | Up   | unknown protein                                                                  |     |
| Pc_TC016319 | -0.09 | 0.93  |      | -0.57 | 0.53      |      | -1    | 0.41      |      | -2.13 | 0.03  | Down | Nucleotide/sugar transporter family protein                                      |     |
| Pc_TC016329 | -1.51 | 0.54  |      | 0     | 0.2       |      | 2.92  | 0.04      | Up   | -1.96 | 0.4   |      | Expressed protein                                                                |     |
| Pc_TC016331 | -0.67 | 0.45  |      | -1.06 | 0.31      |      | 2.25  | 0.05      | Up   | 1.99  | 0.01  | Up   | Expressed protein                                                                |     |
| Pc_TC016339 | -0.46 | 0.33  |      | -1.77 | 0         | Down | 1.46  | 0.11      |      | 0.76  | 0.2   |      | RNA-directed DNA polymerase (reverse transcriptase)-related family protein       |     |
| Pc_TC016355 | 0.28  | 0.86  |      | 1.49  | 0.17      |      | 0     | 0.03      |      | -4.08 | 0.04  | Down | OSIGBa0135C09.3 protein                                                          |     |
| Pc_TC016361 | 3.19  | 0     | Up   | 0     | 0.2       |      | 2.44  | 0.1       |      | 0.04  | 1     |      | end binding protein 1B                                                           |     |
| Pc_TC016390 | 1.96  | 0     | Up   | 0     | 0         |      | 1.96  | 0.09      |      | 0.91  | 0.29  |      | heptahelical protein 3                                                           |     |
| Pc_TC016421 | -0.8  | 0.3   |      | 1.14  | 0.13      |      | -3.06 | 0.02      | Down | -1.8  | 0.05  |      | general control non-repressible 4                                                |     |
| Pc_TC016423 | 0.53  | 0.38  |      | 0.51  | 0.47      |      | -3.77 | 0         | Down | -3.64 | ##### | Down | Uncharacterized protein                                                          |     |
| Pc_TC016431 | 0.19  | 0.84  |      | 0.25  | 0.81      |      | -3.67 | 0.02      | Down | -4.54 | 0     | Down | expansin 11                                                                      |     |
| Pc_TC016435 | -0.27 | 0.6   |      | -0.08 | 0.9       |      | 2.02  | 0.03      | Up   | 1.76  | 0     | Up   | Protein kinase superfamily protein                                               |     |
| Pc_TC016451 | 1.57  | 0.02  | Up   | 0     | 9.94E-005 |      | 1.33  | 0.24      |      | 0.2   | 0.84  |      | actin 7                                                                          |     |
| Pc_TC016454 | -1.38 | 0     | Down | -2.45 | 1.19E-005 | Down | 1.74  | 0.05      | Up   | 0.45  | 0.4   |      | farnesyl diphosphate synthase 1                                                  |     |
| Pc_TC016458 | 1.87  | 0     | Up   | 0     | 4.03E-007 |      | 1.84  | 0.08      |      | 0.36  | 0.64  |      | Cysteine proteinases superfamily protein                                         |     |
| Pc_TC016465 | -0.67 | 0.1   |      | -1.08 | 0.04      | Down | 1.65  | 0.06      |      | 0.72  | 0.19  |      | Pyridine nucleotide-disulphide oxidoreductase family protein                     |     |
| Pc_TC016473 | 0.82  | 0.28  |      | 0.33  | 0.74      |      | -4.58 | 0.01      | Down | -4.46 | 0     | Down | homologue of NAP57                                                               |     |
| Pc_TC016476 | -0.57 | 0.41  |      | -1.41 | 0.09      |      | 2.68  | 0.01      | Up   | 1.03  | 0.16  |      | TPX2 (targeting protein for Xklp2) protein family                                |     |
| Pc_TC016483 | -0.39 | 0.24  |      | -0.62 | 0.16      |      | 2.72  | 0         | Up   | 1.49  | 0     | Up   | sucrose synthase 4                                                               |     |
| Pc_TC016495 | 3.08  | 0.18  |      | 0     | 1         |      | 4.31  | 0.04      | Up   | 3.43  | 0.1   |      | Os01g0506200 protein                                                             |     |
| Pc_TC016512 | 0.21  | 0.51  |      | 0.74  | 0.06      |      | -3.1  | 0         | Down | -1.57 | 0     | Down | DC1 domain-containing protein                                                    |     |
| Pc_TC016532 | -3.45 | 0     | Down | -1.88 | 0.07      |      | -2.11 | 0.11      |      | -2.73 | 0.01  | Down | light-harvesting chlorophyll-protein complex I subunit A4                        |     |
| Pc_TC016533 | 0.01  | 1     |      | 0.18  | 0.86      |      | 0.97  | 0.4       |      | 1.8   | 0.02  | Up   | solute:sodium symporters;urea transmembrane transporters                         |     |
| Pc_TC016537 | 0.02  | 0.96  |      | 0.16  | 0.77      |      | -4.98 | 3.49E-005 | Down | -2.57 | 0     | Down | Expressed protein                                                                |     |
| Pc_TC016538 | 0.54  | 0.19  |      | 0.63  | 0.23      |      | -2.19 | 0.03      | Down | -0.95 | 0.12  |      | Expressed protein                                                                |     |
| Pc_TC016540 | -0.47 | 0.71  |      | 0.2   | 0.9       |      | -1.42 | 0.37      |      | -3.62 | 0.02  | Down | Expressed protein                                                                |     |
| Pc_TC016549 | 3.78  | 0.05  | Up   | 4.31  | 0.02      | Up   | 5.55  | 0         | Up   | 4.53  | 0.01  | Up   | Cytochrome c                                                                     |     |
| Pc_TC016551 | 0.25  | 0.79  |      | 1.9   | 0.02      | Up   | 0.19  | 0.9       |      | 0.1   | 0.95  |      | NADH dehydrogenase subunit 9                                                     |     |
| Pc_TC016562 | -0.1  | 0.93  |      | 1.14  | 0.16      |      | 0     | 0         |      | -3.22 | 0     | Down | Uncharacterized protein                                                          |     |
| Pc_TC016563 | -0.32 | 0.42  |      | -1.06 | 0.04      | Down | 1.49  | 0.09      |      | 0.83  | 0.12  |      | P-loop containing nucleoside triphosphate hydrolases superfamily protein         |     |
| Pc_TC016575 | 0.49  | 0.35  |      | 0.92  | 0.13      |      | -3.41 | 0         | Down | -1    | 0.16  |      | alpha/beta-Hydrolases superfamily protein                                        |     |
| Pc_TC016578 | 0.4   | 0.57  |      | 1.02  | 0.18      |      | -3.84 | 0.01      | Down | -1.91 | 0.04  | Down | Expressed protein                                                                |     |
| Pc_TC016579 | 3.54  | 0.01  | Up   | 3.96  | 0.01      | Up   | 0.5   | 1         |      | 0.63  | 0.96  |      | Expressed protein                                                                |     |
| Pc_TC016585 | 2.16  | 0     | Up   | 0     | 2.00E-005 |      | 2.22  | 0.04      | Up   | 0.79  | 0.32  |      | Expressed protein                                                                |     |
| Pc_TC016588 | 2.02  | 0     | Up   | 0     | 2.63E-007 |      | 1.84  | 0.08      |      | 0.25  | 0.75  |      | ferritin 4                                                                       |     |
| Pc_TC016592 | 0.39  | 0.49  |      | -0.16 | 0.82      |      | 0.77  | 0.46      |      | 1.33  | 0.05  | Up   | cysteine-rich RLK (RECEPTOR-like protein kinase) 10                              |     |
| Pc_TC016599 | -0.45 | 0.26  |      | -1.03 | 0.05      | Down | 1.83  | 0.04      | Up   | 0.81  | 0.13  |      | membrane protein,putative                                                        |     |
| Pc_TC016600 | 5.54  | ##### | Up   | 0     | 0.07      |      | 4.34  | 0         | Up   | 3.2   | 0     | Up   | Expressed protein                                                                |     |
| Pc_TC016607 | 0.15  | 0.7   |      | 0.9   | 0.06      |      | -4.33 | 7.22E-005 | Down | -2.27 | 0     | Down | Glycosyl hydrolases family 32 protein                                            |     |
| Pc_TC016631 | 2.66  | 0.06  |      | 1.93  | 0.29      |      | 2.24  | 0.24      |      | 3.4   | 0.01  | Up   | Expressed protein                                                                |     |
| Pc_TC016641 | 1.95  | ##### | Up   | -9.67 | 1.44E-044 | Down | 1.84  | 0.03      | Up   | 0.66  | 0.18  |      | cytochrome oxidase                                                               |     |
| Pc_TC016644 | -0.77 | 0.06  |      | -1.36 | 0.01      | Down | 0.86  | 0.33      |      | 0.58  | 0.28  |      | INVOLVED IN: RNA processing                                                      |     |

|             |       |       |      |       |           |      |  |       |           |      |       |       |      |                                                                                           |      |
|-------------|-------|-------|------|-------|-----------|------|--|-------|-----------|------|-------|-------|------|-------------------------------------------------------------------------------------------|------|
| Pc_TC016647 | 1.66  | 0.03  | Up   | 0.64  | 0.53      |      |  | 1.47  | 0.23      |      | 2.17  | 0.01  | Up   | Expressed protein                                                                         |      |
| Pc_TC016670 | -1.38 | 0.12  |      | -0.08 | 0.96      |      |  | 2.17  | 0.05      | Up   | 1.49  | 0.06  |      | Glycosyl hydrolase family protein                                                         |      |
| Pc_TC016682 | 0.1   | 0.9   |      | -1.3  | 0.13      |      |  | 2.77  | 0.01      | Up   | 1.24  | 0.09  |      | PYR1-like 4                                                                               |      |
| Pc_TC016683 | 1.76  | 0.08  |      | 2.8   | 0         | Up   |  | 1.09  | 0.48      |      | 2.45  | 0.01  | Up   | beta-1,3-glucanase 2                                                                      |      |
| Pc_TC016685 | 0.54  | 0.12  |      | 1.15  | 0.01      | Up   |  | -2.72 | 0         | Down | -1.3  | 0.02  | Down | similar to RCD one 3                                                                      |      |
| Pc_TC016696 | 1.45  | 0.04  | Up   | 1.22  | 0.14      |      |  | -1.06 | 0.42      |      | -0.03 | 1     |      | alpha/beta-Hydrolases superfamily protein                                                 |      |
| Pc_TC016710 | 0.41  | 0.52  |      | 0.69  | 0.34      |      |  | -2.26 | 0.06      |      | -2.26 | 0.01  | Down | NAC (No Apical Meristem) domain transcriptional regulator superfamily protein             | NAC  |
| Pc_TC016711 | 1.89  | 0.02  | Up   | 1.01  | 0.35      |      |  | 0.83  | 0.56      |      | 2     | 0.03  | Up   | Lung seven transmembrane receptor family protein                                          |      |
| Pc_TC016729 | 0.82  | 0.79  |      | -1.53 | 0.79      |      |  | 4.11  | 0.01      | Up   | 2.04  | 0.22  |      | Globin domain containing protein                                                          |      |
| Pc_TC016734 | -0.34 | 0.83  |      | -1.13 | 0.44      |      |  | -2.5  | 0.16      |      | -3.37 | 0.04  | Down | Protein of unknown function (DUF 3339)                                                    |      |
| Pc_TC016735 | -0.05 | 0.97  |      | 1.2   | 0.11      |      |  | -3.03 | 0.03      | Down | -2.91 | 0     | Down | Expressed protein                                                                         |      |
| Pc_TC016736 | 0.34  | 0.43  |      | 0.38  | 0.48      |      |  | -1.83 | 0.07      |      | -1.75 | 0.01  | Down | Juvenile hormone epoxide hydrolase-like protein 5                                         |      |
| Pc_TC016738 | 3.44  | ##### | Up   | 0     | 4.69E-005 |      |  | 2.41  | 0.03      | Up   | 0.9   | 0.26  |      | Expressed protein                                                                         |      |
| Pc_TC016745 | 2.45  | 0     | Up   | 0     | 0         |      |  | 1.83  | 0.11      |      | 0.35  | 0.71  |      | Expressed protein                                                                         |      |
| Pc_TC016764 | -1.67 | 0.01  | Down | -1.99 | 0.01      | Down |  | 1.91  | 0.06      |      | 0.57  | 0.41  |      | cellulose synthase-like D3                                                                |      |
| Pc_TC016767 | 0.1   | 0.75  |      | 0.21  | 0.62      |      |  | -1.76 | 0.05      | Down | -1.42 | 0.01  | Down | K+ uptake transporter 3                                                                   |      |
| Pc_TC016779 | 0.49  | 0.55  |      | -0.59 | 0.58      |      |  | -0.45 | 0.74      |      | -2.83 | 0.02  | Down | Putative uncharacterized protein                                                          |      |
| Pc_TC016781 | 1.92  | 0     | Up   | 1.11  | 0.1       |      |  | 1.96  | 0.06      |      | 1.64  | 0.02  | Up   | Undecaprenyl pyrophosphate synthetase family protein                                      |      |
| Pc_TC016787 | -1.51 | 0.54  |      | -1.53 | 0.58      |      |  | 3.09  | 0.03      | Up   | 1.99  | 0.11  |      | peroxidase 2                                                                              |      |
| Pc_TC016792 | -0.71 | 0.46  |      | -1.09 | 0.32      |      |  | -5.45 | 0.01      | Down | -3.01 | 0.01  | Down | expansin B2                                                                               |      |
| Pc_TC016802 | 1.79  | 0.01  | Up   | 0.85  | 0.35      |      |  | 2.5   | 0.03      | Up   | 0.11  | 0.94  |      | Putative uncharacterized protein                                                          |      |
| Pc_TC016809 | 0.43  | 0.43  |      | 0.82  | 0.19      |      |  | -2.89 | 0.01      | Down | -1.41 | 0.06  |      | (RAP Annotation release2) Conserved hypothetical protein                                  |      |
| Pc_TC016820 | 0.25  | 0.6   |      | 2.43  | 2.01E-006 | Up   |  | 1.58  | 0.09      |      | -0.35 | 0.58  |      | ankyrin repeat-containing protein 2                                                       |      |
| Pc_TC016828 | 1.11  | 0.02  | Up   | 1.97  | 0         | Up   |  | -2.83 | 0.01      | Down | -1.21 | 0.09  |      | carboxyesterase 13                                                                        |      |
| Pc_TC016836 | 0.53  | 0.13  |      | 1.29  | 0         | Up   |  | -1.11 | 0.21      |      | 0.16  | 0.75  |      | C2 calcium/lipid-binding and GRAM domain containing protein                               |      |
| Pc_TC016844 | 0.16  | 0.88  |      | -2.66 | 0.03      | Down |  | 0.34  | 0.8       |      | 2.2   | 0.01  | Up   | phospholipase A 2A                                                                        |      |
| Pc_TC016848 | 0.52  | 0.34  |      | 0.69  | 0.28      |      |  | -4.73 | 0         | Down | -1.63 | 0.03  | Down | Cystathionine beta-synthase (CBS) protein                                                 |      |
| Pc_TC016852 | 0.7   | 0.05  |      | 1.49  | 0         | Up   |  | -3.21 | 0         | Down | 0.28  | 0.6   |      | Pyridoxal phosphate (PLP)-dependent transferases superfamily protein                      |      |
| Pc_TC016859 | 0.73  | 0.16  |      | 1.84  | 0         | Up   |  | -2.96 | 0.01      | Down | -0.54 | 0.44  |      | mitogen-activated protein kinase kinase kinase 16                                         |      |
| Pc_TC016870 | 2.05  | 0     | Up   | 0     | 8.90E-006 |      |  | 1.49  | 0.17      |      | -0.35 | 0.69  |      | Expressed protein                                                                         |      |
| Pc_TC016875 | 0.21  | 0.66  |      | 0.77  | 0.17      |      |  | -1.5  | 0.14      |      | -1.57 | 0.02  | Down | Expressed protein                                                                         |      |
| Pc_TC016880 | 1.22  | 0.27  |      | 2.2   | 0.04      | Up   |  | 0     | 0.05      |      | -0.24 | 0.94  |      | Uncharacterized protein                                                                   |      |
| Pc_TC016893 | -1    | 0.03  | Down | -0.28 | 0.61      |      |  | -0.09 | 0.92      |      | -0.36 | 0.55  |      | Uncharacterized protein                                                                   |      |
| Pc_TC016896 | -3.41 | 0     | Down | -0.85 | 0.38      |      |  | 1.49  | 0.19      |      | -1.01 | 0.28  |      | Expressed protein                                                                         |      |
| Pc_TC016915 | 0.66  | 0.05  |      | 0.9   | 0.03      |      |  | -1.88 | 0.04      | Down | -0.48 | 0.36  |      | fucosyltransferase 1                                                                      |      |
| Pc_TC016923 | -1    | 0.04  |      | -2.15 | 0         | Down |  | 2.04  | 0.03      | Up   | 0.89  | 0.13  |      | pyrophosphorylase 1                                                                       |      |
| Pc_TC016933 | 0.01  | 1     |      | -0.33 | 0.67      |      |  | -2.92 | 0.02      | Down | -1.23 | 0.12  |      | Uncharacterized protein                                                                   |      |
| Pc_TC016934 | 5.97  | ##### | Up   | 0     | 0.36      |      |  | 4.34  | 0         | Up   | 2.58  | 0.05  |      | Putative uncharacterized protein                                                          |      |
| Pc_TC016942 | 0.36  | 0.41  |      | -0.15 | 0.8       |      |  | -2.31 | 0.03      | Down | -1.64 | 0.01  | Down | GRAM domain-containing protein / ABA-responsive protein-related                           |      |
| Pc_TC016953 | -0.4  | 0.65  |      | 0.13  | 0.91      |      |  | -2.46 | 0.08      |      | -2.2  | 0.04  | Down | Expressed protein                                                                         |      |
| Pc_TC016954 | 1.39  | 0.05  |      | 1.64  | 0.04      | Up   |  | -0.04 | 1         |      | 1.75  | 0.03  | Up   | WRKY DNA-binding protein 61                                                               | WRKY |
| Pc_TC016957 | 0.36  | 0.39  |      | 1.64  | 0         | Up   |  | -5.96 | 1.09E-006 | Down | -4.03 | ##### | Down | NB-ARC domain-containing disease resistance protein                                       |      |
| Pc_TC016976 | 0.72  | 0.41  |      | 0.44  | 0.69      |      |  | -5.02 | 0.01      | Down | -1.09 | 0.35  |      | Leucine-rich repeat protein kinase family protein                                         |      |
| Pc_TC016983 | 3.19  | 0.01  | Up   | 0     | 0.48      |      |  | 1.73  | 0.42      |      | 0.63  | 0.88  |      | Uncharacterized protein                                                                   |      |
| Pc_TC016985 | 0.1   | 0.73  |      | 0.01  | 0.98      |      |  | -1.96 | 0.02      | Down | -1.36 | 0.01  | Down | Xanthine/uracil permease family protein                                                   |      |
| Pc_TC016990 | 0.42  | 0.24  |      | 0.66  | 0.14      |      |  | -1.9  | 0.04      | Down | -1.26 | 0.02  | Down | Nucleotide-diphospho-sugar transferase family protein                                     |      |
| Pc_TC017009 | 0.66  | 0.16  |      | 1.14  | 0.04      | Up   |  | -1.53 | 0.14      |      | -0.71 | 0.28  |      | Kinase interacting (KIP1-like) family protein                                             |      |
| Pc_TC017040 | 0.41  | 0.59  |      | 0.23  | 0.81      |      |  | 2.23  | 0.04      | Up   | 1.75  | 0.02  | Up   | Protein of unknown function (DUF1191)                                                     |      |
| Pc_TC017043 | -1.59 | 0.02  | Down | -1.5  | 0.05      |      |  | 1.53  | 0.14      |      | -1.36 | 0.08  |      | NAD(P)-binding Rossmann-fold superfamily protein                                          |      |
| Pc_TC017045 | 0.46  | 0.58  |      | 0.77  | 0.39      |      |  | 1.33  | 0.26      |      | 1.77  | 0.03  | Up   | Bifunctional inhibitor/lipid-transfer protein/seed storage 2S albumin superfamily protein |      |
| Pc_TC017048 | 0.03  | 0.99  |      | 1.61  | 0.02      | Up   |  | -1.34 | 0.25      |      | -0.16 | 0.85  |      | IAA-leucine resistant (ILR)-like gene 6                                                   |      |
| Pc_TC017054 | 0.67  | 0.03  |      | 0.64  | 0.11      |      |  | -2.32 | 0.01      | Down | -0.41 | 0.41  |      | Plant neutral invertase family protein                                                    |      |
| Pc_TC017059 | -0.59 | 0.39  |      | -1.14 | 0.16      |      |  | 2.12  | 0.04      | Up   | 0.28  | 0.71  |      | Leucine-rich repeat transmembrane protein kinase                                          |      |
| Pc_TC017068 | -0.66 | 0.58  |      | 0.59  | 0.59      |      |  | -2.82 | 0.1       |      | -3.7  | 0.02  | Down | Putative uncharacterized protein OSJNBa0093113.11                                         |      |
| Pc_TC017080 | 0.71  | 0.27  |      | 0.72  | 0.34      |      |  | -2.7  | 0.04      | Down | -0.53 | 0.53  |      | Os09g0400600 protein                                                                      |      |
| Pc_TC017083 | 0.66  | 0.11  |      | 1.51  | 0         | Up   |  | -2.99 | 0         | Down | -1.35 | 0.03  | Down | Protein kinase superfamily protein                                                        |      |
| Pc_TC017102 | -0.29 | 0.62  |      | -1.53 | 0.04      | Down |  | 0.98  | 0.33      |      | 0.19  | 0.78  |      | Plant protein of unknown function (DUF936)                                                |      |
| Pc_TC017113 | -0.33 | 0.5   |      | -1.68 | 0.01      | Down |  | -0.21 | 0.83      |      | -0.56 | 0.38  |      | Cupredoxin superfamily protein                                                            |      |
| Pc_TC017135 | -0.59 | 0.23  |      | -1.29 | 0.04      | Down |  | 0.55  | 0.57      |      | -0.14 | 0.82  |      | EF hand calcium-binding protein family                                                    |      |
| Pc_TC017144 | -0.92 | 0.46  |      | -1.11 | 0.42      |      |  | -0.02 | 1         |      | -4.54 | 0.01  | Down | Mannose-binding lectin superfamily protein                                                |      |
| Pc_TC017163 | 0.14  | 0.64  |      | 0.54  | 0.15      |      |  | -1.69 | 0.05      | Down | -1.29 | 0.01  | Down | metallothionein 2A                                                                        |      |
| Pc_TC017186 | 1.37  | 0.01  | Up   | 1.2   | 0.06      |      |  | 0.41  | 0.69      |      | 1.41  | 0.03  | Up   | Protein kinase family protein                                                             |      |

|             |       |       |      |  |       |           |      |       |           |      |  |       |       |      |                                                                                 |             |
|-------------|-------|-------|------|--|-------|-----------|------|-------|-----------|------|--|-------|-------|------|---------------------------------------------------------------------------------|-------------|
| Pc_TC017192 | -0.68 | 0.19  |      |  | -1.93 | 0         | Down | 1.83  | 0.05      |      |  | 0.97  | 0.11  |      | Stress responsive alpha-beta barrel domain protein                              |             |
| Pc_TC017215 | 0.89  | 0.52  |      |  | -2.94 | 0.25      |      | 5.05  | 7.97E-005 | Up   |  | 3.18  | 0     | Up   | Expressed protein                                                               |             |
| Pc_TC017216 | 2.3   | 0     | Up   |  | -5.33 | 0         | Down | 1.73  | 0.12      |      |  | 0.52  | 0.55  |      | vacuolar ATP synthase subunit A                                                 |             |
| Pc_TC017221 | -0.48 | 0.31  |      |  | 0.33  | 0.54      |      | -5.23 | 1.34E-005 | Down |  | -3.55 | ##### | Down | Uncharacterized protein                                                         |             |
| Pc_TC017234 | 0.6   | 0.29  |      |  | 0.38  | 0.59      |      | -2.72 | 0.02      | Down |  | -1.01 | 0.18  |      | Uncharacterized protein                                                         |             |
| Pc_TC017235 | 1.75  | 0     | Up   |  | 0     | 1.33E-005 |      | 0.97  | 0.38      |      |  | 1     | 0.19  |      | Expressed protein                                                               |             |
| Pc_TC017241 | 2.89  | 0.23  |      |  | 2.06  | 0.59      |      | 4.5   | 0.03      | Up   |  | 2.95  | 0.22  |      | Expressed protein                                                               |             |
| Pc_TC017243 | -1.39 | 0.06  |      |  | -0.88 | 0.28      |      | -1.28 | 0.27      |      |  | -1.8  | 0.03  | Down | Regulator of chromosome condensation (RCC1) family with FYVE zinc finger domain |             |
| Pc_TC017248 | 1.46  | 0     | Up   |  | 1.28  | 0.01      | Up   | -1.93 | 0.05      |      |  | -0.18 | 0.76  |      | Mitochondrial substrate carrier family protein                                  |             |
| Pc_TC017251 | 1.22  | 0.44  |      |  | 2.54  | 0.05      | Up   | 1.43  | 0.43      |      |  | 1.47  | 0.32  |      | B1292H11.27 protein                                                             |             |
| Pc_TC017292 | 0.73  | 0.08  |      |  | -0.4  | 0.47      |      | 1.02  | 0.26      |      |  | 1.94  | 0     | Up   | Glycosyl hydrolase superfamily protein                                          |             |
| Pc_TC017294 | 0.18  | 0.81  |      |  | 1.55  | 0.03      | Up   | 0.54  | 0.63      |      |  | 0.49  | 0.53  |      | Protein kinase superfamily protein                                              |             |
| Pc_TC017310 | -0.23 | 0.47  |      |  | -0.62 | 0.14      |      | -1.91 | 0.03      | Down |  | -1.25 | 0.01  | Down | Putative uncharacterized protein B1402B06.14                                    |             |
| Pc_TC017318 | 2.97  | 0     | Up   |  | 0     | 0.15      |      | 2.45  | 0.09      |      |  | 0.63  | 0.72  |      | Expressed protein                                                               |             |
| Pc_TC017320 | 0.93  | 0.44  |      |  | 0.32  | 0.88      |      | 2.62  | 0.05      | Up   |  | 1.7   | 0.12  |      | Receptor-like protein kinase-related family protein                             |             |
| Pc_TC017340 | -0.73 | 0.1   |      |  | -1.66 | 0         | Down | 1.76  | 0.05      | Up   |  | 0.86  | 0.12  |      | Metallo-hydrolase/oxidoreductase superfamily protein                            |             |
| Pc_TC017347 | -1.38 | 0.08  |      |  | -1.22 | 0.17      |      | 2.88  | 0.01      | Up   |  | 1.92  | 0.01  | Up   | glutamine synthetase 2                                                          |             |
| Pc_TC017348 | 0.07  | 0.93  |      |  | 0.36  | 0.6       |      | -3.98 | 0         | Down |  | -1.34 | 0.08  |      | GDSL-like Lipase/Acylhydrolase superfamily protein                              |             |
| Pc_TC017358 | 1.55  | 0.01  | Up   |  | -0.54 | 0.53      |      | 0.94  | 0.39      |      |  | 1.96  | 0.01  | Up   | NAD(P)-binding Rossmann-fold superfamily protein                                |             |
| Pc_TC017362 | 3.47  | 0.02  | Up   |  | 0     | 0.67      |      | 3.03  | 0.12      |      |  | 1.8   | 0.42  |      | delta 1-pyrroline-5-carboxylate synthase 2                                      |             |
| Pc_TC017390 | -0.6  | 0.53  |      |  | 1.1   | 0.2       |      | -1.69 | 0.23      |      |  | -2.37 | 0.04  | Down | Expressed protein                                                               |             |
| Pc_TC017401 | 0.03  | 0.91  |      |  | 0.08  | 0.83      |      | -1.99 | 0.02      | Down |  | -0.76 | 0.12  |      | CBL-interacting protein kinase 2                                                |             |
| Pc_TC017414 | -2.51 | 0.02  | Down |  | -2.53 | 0.03      | Down | 0.78  | 0.52      |      |  | -0.26 | 0.81  |      | Expressed protein                                                               |             |
| Pc_TC017418 | -0.39 | 0.77  |      |  | -0.02 | 1         |      | 0     | 0.01      |      |  | -4.54 | 0.01  | Down | Expressed protein                                                               |             |
| Pc_TC017424 | -1.92 | 0.59  |      |  | 0.06  | 1         |      | 5.01  | 0         | Up   |  | 3.56  | 0     | Up   | xyloglucan endotransglucosylase/hydrolase 9                                     |             |
| Pc_TC017428 | 0.36  | 0.44  |      |  | 1.21  | 0.02      | Up   | -1.99 | 0.05      |      |  | -1.38 | 0.04  | Down | Protein of unknown function (DUF604)                                            |             |
| Pc_TC017433 | 3.25  | 0.03  | Up   |  | 3.58  | 0.02      | Up   | 2.59  | 0.22      |      |  | 1.63  | 0.49  |      | NADH-ubiquinone oxidoreductase chain 2                                          |             |
| Pc_TC017434 | 0.28  | 0.48  |      |  | 0.5   | 0.3       |      | -2.1  | 0.03      | Down |  | -1.54 | 0.01  | Down | O-Glycosyl hydrolases family 17 protein                                         |             |
| Pc_TC017435 | -1.69 | 0.09  |      |  | -3.03 | 0.02      | Down | -2.78 | 0.06      |      |  | -3.46 | 0.01  | Down | Os07g0253000 protein                                                            |             |
| Pc_TC017448 | 0.66  | 0.22  |      |  | 0.1   | 0.9       |      | 1.63  | 0.1       |      |  | 1.64  | 0.01  | Up   | S-locus lectin protein kinase family protein                                    |             |
| Pc_TC017458 | 1.45  | 0.04  | Up   |  | 0     | 0         |      | 2.3   | 0.04      | Up   |  | -0.1  | 0.94  |      | cDNA clone:002-172-H11,full insert sequence                                     |             |
| Pc_TC017462 | 0     | 0.44  |      |  | 1.28  | 0.58      |      | 3.92  | 0.01      | Up   |  | 2.43  | 0.11  |      | Expressed protein                                                               |             |
| Pc_TC017463 | -1.35 | 0.02  | Down |  | -1.76 | 0.01      | Down | 1.31  | 0.18      |      |  | 0.45  | 0.5   |      | myosin heavy chain-related                                                      |             |
| Pc_TC017465 | 1.86  | 0     | Up   |  | 0     | 7.32E-005 |      | 1.51  | 0.18      |      |  | 0.22  | 0.82  |      | Putative uncharacterized protein                                                |             |
| Pc_TC017485 | 7.39  | ##### | Up   |  | 0     | 0.01      |      | 9.66  | 6.44E-016 | Up   |  | -1.14 | 0.38  |      | Expressed protein                                                               |             |
| Pc_TC017503 | -0.18 | 0.69  |      |  | -0.55 | 0.33      |      | 1.52  | 0.09      |      |  | 1.12  | 0.05  | Up   | Mog1/PsbP/DUF1795-like photosystem II reaction center PsbP family protein       |             |
| Pc_TC017508 | 0.28  | 0.58  |      |  | 0.5   | 0.4       |      | -1.69 | 0.11      |      |  | -1.61 | 0.02  | Down | Uncharacterized protein                                                         |             |
| Pc_TC017511 | 0.71  | 0.15  |      |  | 0.7   | 0.24      |      | -2.88 | 0.01      | Down |  | -0.79 | 0.24  |      | DEAD-box protein abstract,putative                                              |             |
| Pc_TC017518 | 2.72  | 0     | Up   |  | 0     | 0         |      | 1.09  | 0.39      |      |  | 0.72  | 0.47  |      | RmlC-like cupins superfamily protein                                            |             |
| Pc_TC017519 | 4.82  | ##### | Up   |  | 0     | 0.09      |      | 3.53  | 0.01      | Up   |  | 1.16  | 0.35  |      | annexin 5                                                                       |             |
| Pc_TC017520 | 0.51  | 0.21  |      |  | 0.82  | 0.1       |      | -2.52 | 0.01      | Down |  | -0.5  | 0.4   |      | Expressed protein                                                               |             |
| Pc_TC017526 | 0.47  | 0.24  |      |  | 0.75  | 0.13      |      | -2.28 | 0.02      | Down |  | -1.23 | 0.04  | Down | stress-inducible protein,putative                                               | TPR         |
| Pc_TC017534 | 0.69  | 0.12  |      |  | 0.88  | 0.1       |      | -2.19 | 0.03      | Down |  | -0.92 | 0.15  |      | Phospholipid/glycerol acyltransferase family protein                            |             |
| Pc_TC017542 | 0.16  | 0.62  |      |  | 0.4   | 0.34      |      | -2.98 | 0         | Down |  | -2.3  | ##### | Down | Protein kinase superfamily protein                                              |             |
| Pc_TC017583 | -0.24 | 0.78  |      |  | -0.97 | 0.3       |      | -1.08 | 0.38      |      |  | -2.05 | 0.04  | Down | UniRef100                                                                       |             |
| Pc_TC017589 | 0.77  | 0.2   |      |  | -0.29 | 0.71      |      | 1.35  | 0.2       |      |  | 1.8   | 0.01  | Up   | Leucine-rich receptor-like protein kinase family protein                        |             |
| Pc_TC017593 | -0.48 | 0.5   |      |  | -0.87 | 0.3       |      | 2.97  | 0         | Up   |  | 1.44  | 0.04  | Up   | bidirectional amino acid transporter 1                                          |             |
| Pc_TC017594 | 1.24  | 0.06  |      |  | 0.73  | 0.37      |      | -0.65 | 0.6       |      |  | 2.34  | 0     | Up   | cytochrome P450,family 76,subfamily C,polypeptide 2                             |             |
| Pc_TC017597 | 0.41  | 0.6   |      |  | -1.16 | 0.25      |      | 1.26  | 0.27      |      |  | 1.68  | 0.03  | Up   | SGNH hydrolase-type esterase superfamily protein                                | HRT         |
| Pc_TC017620 | 0.86  | 0.1   |      |  | 0.98  | 0.12      |      | -3.21 | 0.01      | Down |  | -0.87 | 0.23  |      | chitinase A                                                                     |             |
| Pc_TC017625 | 0.18  | 0.55  |      |  | -0.1  | 0.79      |      | -1.88 | 0.03      | Down |  | -1.07 | 0.03  | Down | myb-like transcription factor family protein                                    | MYB-related |
| Pc_TC017628 | 4.33  | 0     | Up   |  | 3.06  | 0.08      |      | 1.83  | 0.47      |      |  | 2.63  | 0.14  |      | Expressed protein                                                               |             |
| Pc_TC017631 | 0.79  | 0.26  |      |  | 0.28  | 0.76      |      | 2.03  | 0.07      |      |  | 1.71  | 0.02  | Up   | O-Glycosyl hydrolases family 17 protein                                         |             |
| Pc_TC017637 | 0.67  | 0.07  |      |  | 0.73  | 0.12      |      | -1.94 | 0.04      | Down |  | -0.22 | 0.69  |      | RING/U-box superfamily protein                                                  |             |
| Pc_TC017651 | 0.19  | 0.72  |      |  | 1.3   | 0.03      | Up   | -3.51 | 0         | Down |  | -1.19 | 0.09  |      | plant U-box 25                                                                  |             |
| Pc_TC017671 | -0.92 | 0.65  |      |  | 0.87  | 0.57      |      | 2.75  | 0.05      | Up   |  | 0.95  | 0.49  |      | beta-ketoacyl reductase 2                                                       |             |
| Pc_TC017672 | 1.25  | 0.48  |      |  | 1.52  | 0.39      |      | 3.79  | 0.01      | Up   |  | 2.48  | 0.07  |      | cyclin p4;3                                                                     |             |
| Pc_TC017684 | 0.11  | 0.81  |      |  | 0.83  | 0.11      |      | -1.23 | 0.21      |      |  | -1.55 | 0.01  | Down | UDP-D-glucuronate 4-epimerase 1                                                 |             |
| Pc_TC017692 | -2.24 | 0.03  | Down |  | -1.37 | 0.2       |      | 1.73  | 0.13      |      |  | 1.64  | 0.04  | Up   | xyloglucan endo-transglycosylase-related 8                                      |             |
| Pc_TC017695 | 1.3   | 0.35  |      |  | 2.47  | 0.04      | Up   | -2.08 | 0.43      |      |  | 1.95  | 0.12  |      | Expressed protein                                                               |             |
| Pc_TC017721 | 0.89  | 0.01  |      |  | 1.22  | 0.01      | Up   | -2.55 | 0.01      | Down |  | -0.26 | 0.64  |      | beta-glucosidase 47                                                             |             |
| Pc_TC017722 | -0.51 | 0.67  |      |  | -0.75 | 0.56      |      | 1.43  | 0.25      |      |  | 1.76  | 0.05  | Up   | Expressed protein                                                               |             |

|             |       |       |      |  |           |      |      |       |           |      |       |       |      |                                                                          |      |
|-------------|-------|-------|------|--|-----------|------|------|-------|-----------|------|-------|-------|------|--------------------------------------------------------------------------|------|
| Pc_TC017723 | -0.34 | 0.34  |      |  | -0.87     | 0.06 |      | 1.95  | 0.02      | Up   | 1.23  | 0.02  | Up   | hydroxymethylbilane synthase                                             |      |
| Pc_TC017727 | 1.82  | 0.14  |      |  | -1.53     | 0.58 |      | 3.09  | 0.03      | Up   | 2.33  | 0.05  |      | Putative uncharacterized protein                                         |      |
| Pc_TC017731 | -0.47 | 0.26  |      |  | -1.48     | 0.01 | Down | 2     | 0.02      | Up   | 1.07  | 0.05  | Up   | Chaperone DnaJ-domain superfamily protein                                |      |
| Pc_TC017746 | 0.72  | 0.15  |      |  | 1.15      | 0.05 |      | -7.25 | 1.86E-006 | Down | -3.67 | ##### | Down | Expressed protein                                                        |      |
| Pc_TC017748 | 0.35  | 0.65  |      |  | 1.56      | 0.04 | Up   | 0.78  | 0.5       |      | 0.89  | 0.27  |      | Uncharacterized protein                                                  |      |
| Pc_TC017751 | 1.08  | 0.51  |      |  | 1.44      | 0.37 |      | 2.96  | 0.05      | Up   | 2.43  | 0.05  |      | Expressed protein                                                        |      |
| Pc_TC017766 | 0.72  | 0.07  |      |  | 1.42      | 0    | Up   | -2.24 | 0.02      | Down | -0.75 | 0.21  |      | non-intrinsic ABC protein 3                                              |      |
| Pc_TC017772 | 1.06  | 0.03  | Up   |  | 1.53      | 0.01 | Up   | -0.95 | 0.36      |      | 0.57  | 0.38  |      | nicotianamine synthase 4                                                 |      |
| Pc_TC017775 | 0.87  | 0.02  |      |  | 0.21      | 0.67 |      | -1.03 | 0.27      |      | 1.13  | 0.04  | Up   | Aldolase-type TIM barrel family protein                                  |      |
| Pc_TC017778 | -2.36 | 0.01  | Down |  | -1.57     | 0.09 |      | 0.63  | 0.57      |      | -0.91 | 0.29  |      | Peroxidase superfamily protein                                           |      |
| Pc_TC017788 | -3.92 | ##### | Down |  | -1.51     | 0.04 | Down | -0.9  | 0.4       |      | -0.73 | 0.31  |      | L-Aspartase-like family protein                                          |      |
| Pc_TC017789 | 0.57  | 0.13  |      |  | 0.98      | 0.03 |      | -2.31 | 0.02      | Down | -1.59 | 0.01  | Down | Glycolipid transfer protein (GLTP) family protein                        |      |
| Pc_TC017790 | 0.56  | 0.17  |      |  | 0.96      | 0.06 |      | -3.94 | 0         | Down | -0.46 | 0.44  |      | phosphate transporter 3;1                                                |      |
| Pc_TC017813 | -0.07 | 0.95  |      |  | 0.64      | 0.42 |      | 2.37  | 0.03      | Up   | 1.6   | 0.03  | Up   | TRICHOME BIREFRINGENCE-LIKE 33                                           |      |
| Pc_TC017821 | 1.12  | 0.03  | Up   |  | 0.83      | 0.19 |      | 0.54  | 0.6       |      | 1.32  | 0.04  | Up   | Leucine-rich repeat protein kinase family protein                        |      |
| Pc_TC017822 | -0.3  | 0.67  |      |  | -0.73     | 0.37 |      | -1.83 | 0.13      |      | -1.99 | 0.02  | Down | Dehydration-responsive element-binding protein 1E                        |      |
| Pc_TC017823 | -0.76 | 0.15  |      |  | -1.74     | 0.01 | Down | 1.81  | 0.06      |      | 1.06  | 0.09  |      | plastidic type i signal peptidase 1                                      |      |
| Pc_TC017826 | -0.76 | 0.09  |      |  | -0.93     | 0.09 |      | 1.87  | 0.04      | Up   | 1.07  | 0.06  |      | RNA binding;GTP binding                                                  |      |
| Pc_TC017838 | 0.78  | 0.02  |      |  | 1.44      | 0    | Up   | -3.03 | 0         | Down | -0.18 | 0.74  |      | allene oxide synthase                                                    |      |
| Pc_TC017847 | 0.3   | 0.54  |      |  | 0.71      | 0.22 |      | -2.61 | 0.02      | Down | -1.66 | 0.02  | Down | Proteinase inhibitor,propeptide                                          |      |
| Pc_TC017849 | -0.13 | 0.74  |      |  | -0.5      | 0.3  |      | 1.19  | 0.17      |      | 2.24  | ##### | Up   | Peroxidase superfamily protein                                           |      |
| Pc_TC017863 | -0.98 | 0.02  |      |  | -1.69     | 0    | Down | 0.97  | 0.27      |      | -0.29 | 0.6   |      | PLC-like phosphodiesterases superfamily protein                          |      |
| Pc_TC017892 | 1.13  | 0.14  |      |  | 1.32      | 0.13 |      | -1.23 | 0.37      |      | -2.47 | 0.04  | Down | Cytochrome b561/ferric reductase transmembrane with DOMON related domain |      |
| Pc_TC017896 | 1.42  | 0.12  |      |  | 0.61      | 0.62 |      | 1.94  | 0.13      |      | 2.11  | 0.02  | Up   | SGNH hydrolase-type esterase superfamily protein                         |      |
| Pc_TC017915 | -0.32 | 0.34  |      |  | -0.64     | 0.14 |      | 1.88  | 0.03      | Up   | 1.09  | 0.03  | Up   | thylakoid rhodanese-like                                                 |      |
| Pc_TC017921 | 0.78  | 0.28  |      |  | 1.21      | 0.19 |      | -3.4  | 0.02      | Down | -2.54 | 0.02  | Down | Uncharacterized protein                                                  |      |
| Pc_TC017924 | 0.08  | 0.91  |      |  | 0.89      | 0.18 |      | 2.47  | 0.01      | Up   | 1.07  | 0.12  |      | FASCIKLIN-like arabinogalactan-protein 11                                |      |
| Pc_TC017929 | 0.1   | 0.73  |      |  | 0.41      | 0.28 |      | -6.06 | 2.45E-009 | Down | -3.48 | ##### | Down | seed imbibition 2                                                        |      |
| Pc_TC017933 | 0.29  | 0.43  |      |  | 0.59      | 0.21 |      | -1.44 | 0.12      |      | -1.17 | 0.04  | Down | Golgi apparatus membrane protein TVP15 (InterPro:IPR013714)              |      |
| Pc_TC017937 | 2.1   | 0.01  | Up   |  | 0         | 0.01 |      | 2.17  | 0.08      |      | 0.54  | 0.64  |      | Expressed protein                                                        |      |
| Pc_TC017943 | -0.7  | 0.06  |      |  | -0.85     | 0.07 |      | 2.05  | 0.02      | Up   | 0.92  | 0.08  |      | Beta-1,3-glucan recognition protein                                      |      |
| Pc_TC017947 | 3.77  | ##### | Up   |  | 0         | 0.03 |      | 2.53  | 0.05      | Up   | 0.63  | 0.61  |      | Expressed protein                                                        |      |
| Pc_TC017948 | 0.69  | 0.06  |      |  | 1.38      | 0    | Up   | -2.7  | 0.01      | Down | -1.05 | 0.07  |      | ortholog of sugar beet HS1 PRO-1 2                                       |      |
| Pc_TC017974 | 5.82  | ##### | Up   |  | 0         | 0.67 |      | 1.83  | 0.47      |      | 0.95  | 0.81  |      | Putative DNA-binding protein                                             |      |
| Pc_TC017976 | -1.85 | 0.15  |      |  | 0.2       | 0.9  |      | 2.96  | 0.01      | Up   | 1.75  | 0.06  |      | auxin response factor 10                                                 | ARF  |
| Pc_TC017991 | 3.05  | 0     | Up   |  | 0         | 0.2  |      | 2.44  | 0.1       |      | 2.71  | 0.02  | Up   | Putative uncharacterized protein                                         |      |
| Pc_TC017994 | -0.03 | 0.94  |      |  | -0.29     | 0.58 |      | 1.63  | 0.07      |      | 1.11  | 0.04  | Up   | Epstein-Barr virus EBNA-1-like protein                                   |      |
| Pc_TC017996 | 0.44  | 0.57  |      |  | 0.93      | 0.26 |      | 2.28  | 0.04      | Up   | 0.82  | 0.33  |      | Protein kinase superfamily protein                                       |      |
| Pc_TC018003 | 2.25  | 0.09  |      |  | 0         | 0.36 |      | 3.15  | 0.04      | Up   | 1.95  | 0.19  |      | Expressed protein                                                        |      |
| Pc_TC018011 | 0.26  | 0.49  |      |  | 0.42      | 0.38 |      | -1.94 | 0.04      | Down | -0.65 | 0.25  |      | beta-hydroxyisobutyryl-CoA hydrolase 1                                   |      |
| Pc_TC018028 | -1.66 | 0.35  |      |  | 2.89      | 0    | Up   | -3.82 | 0.12      |      | 0     | 0.03  |      | ARP protein (REF)                                                        |      |
| Pc_TC018038 | 3.12  | 0.01  | Up   |  | 0         | 0.36 |      | 3.73  | 0.01      | Up   | 2.33  | 0.09  |      | Expressed protein                                                        |      |
| Pc_TC018054 | -1.1  | 0.16  |      |  | -1.87     | 0.05 | Down | 0.34  | 0.77      |      | -0.5  | 0.56  |      | Expressed protein                                                        |      |
| Pc_TC018060 | -0.9  | 0.08  |      |  | 1.35      | 0.01 | Up   | -0.59 | 0.55      |      | 0.15  | 0.81  |      | zinc finger (CCCH-type/C3HC4-type RING finger) family protein            | C3H  |
| Pc_TC018062 | 2.49  | 0.09  |      |  | 3.12      | 0.03 | Up   | -1.08 | 0.83      |      | 2.56  | 0.09  |      | Expressed protein                                                        |      |
| Pc_TC018075 | -1.82 | 0.01  | Down |  | -3.31     | 0    | Down | 0.05  | 0.97      |      | -0.74 | 0.35  |      | Uncharacterized protein                                                  |      |
| Pc_TC018080 | -0.51 | 0.58  |      |  | -2.53     | 0.03 | Down | -1.08 | 0.41      |      | -0.96 | 0.34  |      | Os11g0576900 protein (Fragment)                                          |      |
| Pc_TC018085 | 0.41  | 0.4   |      |  | 0.62      | 0.29 |      | 2.02  | 0.03      | Up   | 1.28  | 0.03  | Up   | S-adenosyl-L-methionine-dependent methyltransferases superfamily protein |      |
| Pc_TC018122 | 5.17  | ##### | Up   |  | 0         | 0.67 |      | 3.83  | 0.03      | Up   | 2.8   | 0.1   |      | regulatory particle triple-A ATPase 4A                                   |      |
| Pc_TC018139 | -0.24 | 0.77  |      |  | 0.3       | 0.74 |      | -0.93 | 0.45      |      | -2.11 | 0.03  | Down | Expressed protein                                                        |      |
| Pc_TC018140 | 1.53  | 0.04  | Up   |  | 0         | 0    |      | 1.2   | 0.33      |      | -0.12 | 0.94  |      | Serine carboxypeptidase S28 family protein                               |      |
| Pc_TC018144 | 0.02  | 0.99  |      |  | 1.07      | 0.11 |      | -2.08 | 0.08      |      | -2.35 | 0.01  | Down | protein,putative,Ty1-copia sub-class                                     |      |
| Pc_TC018158 | 0.19  | 0.87  |      |  | 0.17      | 0.91 |      | -4.14 | 0.02      | Down | -3.43 | 0.01  | Down | Uncharacterized protein                                                  |      |
| Pc_TC018161 | 0.49  | 0.18  |      |  | 0.96      | 0.04 |      | -3.1  | 0         | Down | -1.35 | 0.02  | Down | ABRE binding factor 4                                                    | bZIP |
| Pc_TC018163 | -3.38 | 0.02  | Down |  | 0.41      | 0.72 |      | 0.66  | 0.63      |      | 0.34  | 0.77  |      | Putative polyprotein                                                     |      |
| Pc_TC018176 | -0.43 | 0.64  |      |  | -0.02     | 1    |      | -1.18 | 0.37      |      | -2.78 | 0.01  | Down | Expressed protein                                                        |      |
| Pc_TC018194 | 0.91  | 0.12  |      |  | 1.45      | 0.03 | Up   | -2.27 | 0.06      |      | 0.36  | 0.63  |      | RING/U-box superfamily protein                                           |      |
| Pc_TC018201 | 1.65  | 0     | Up   |  | 2.02E-009 |      |      | 1.92  | 0.06      |      | 0.97  | 0.15  |      | Putative uncharacterized protein Sb03g046927 (Fragment)                  |      |
| Pc_TC018213 | -0.16 | 0.73  |      |  | -0.38     | 0.52 |      | 2.24  | 0.01      | Up   | 1.18  | 0.04  | Up   | PLC-like phosphodiesterase family protein                                |      |
| Pc_TC018216 | 2.72  | 0.03  | Up   |  | 0         | 0.36 |      | 2.36  | 0.16      |      | 1.08  | 0.57  |      | Expressed protein                                                        |      |
| Pc_TC018235 | -1.8  | 0.03  | Down |  | -0.86     | 0.32 |      | -0.96 | 0.42      |      | -0.99 | 0.25  |      | Expressed protein                                                        |      |
| Pc_TC018239 | 0.42  | 0.57  |      |  | 1.58      | 0.03 | Up   | -2.22 | 0.09      |      | -0.97 | 0.28  |      | Expressed protein                                                        |      |

|             |       |       |      |       |           |      |       |      |      |       |       |      |                                                                               |     |
|-------------|-------|-------|------|-------|-----------|------|-------|------|------|-------|-------|------|-------------------------------------------------------------------------------|-----|
| Pc_TC018249 | -0.34 | 0.69  |      | -2.07 | 0.05      | Down | 0.53  | 0.65 |      | 0.33  | 0.71  |      | Expressed protein                                                             |     |
| Pc_TC018269 | -0.85 | 0.34  |      | -0.1  | 0.94      |      | 3.39  | 0    | Up   | 1.21  | 0.14  |      | cellulose synthase-like A02                                                   |     |
| Pc_TC018276 | -2.31 | 0.02  | Down | -0.53 | 0.59      |      | 0.32  | 0.8  |      | -0.77 | 0.42  |      | Sec1/munc18-like (SM) proteins superfamily                                    |     |
| Pc_TC018288 | -0.44 | 0.54  |      | -1.94 | 0.03      | Down | 0.48  | 0.67 |      | 0.19  | 0.82  |      | Ribosomal protein L22p/L17e family protein                                    |     |
| Pc_TC018290 | 2.83  | 0.02  | Up   | 0     | 0.36      |      | 1.96  | 0.27 |      | 0.63  | 0.82  |      | Class II aaRS and biotin synthetases superfamily protein                      |     |
| Pc_TC018293 | -1.62 | 0     | Down | -3.04 | 5.19E-007 | Down | -0.76 | 0.41 |      | -0.35 | 0.54  |      | receptor lectin kinase                                                        |     |
| Pc_TC018300 | 0.8   | 0.34  |      | 0.61  | 0.55      |      | -4.2  | 0.02 | Down | -4.08 | 0.01  | Down | Expressed protein                                                             |     |
| Pc_TC018304 | -1.85 | 0.03  | Down | 0.15  | 0.87      |      | 0.25  | 0.84 |      | 0.39  | 0.63  |      | Putative uncharacterized protein Sb01g026910                                  |     |
| Pc_TC018306 | -1.99 | 0.11  |      | 1.42  | 0.13      |      | -3.89 | 0.04 | Down | -3.18 | 0.03  | Down | Uncharacterized protein                                                       |     |
| Pc_TC018321 | 0.87  | 0.1   |      | 1.44  | 0.02      | Up   | -1.43 | 0.19 |      | -0.12 | 0.87  |      | Peroxidase superfamily protein                                                |     |
| Pc_TC018325 | -0.06 | 0.98  |      | -0.36 | 0.75      |      | -3.17 | 0.04 | Down | -1.67 | 0.12  |      | Uncharacterized protein                                                       |     |
| Pc_TC018332 | -0.45 | 0.69  |      | -4.47 | 0.01      | Down | 0.68  | 0.61 |      | -0.44 | 0.71  |      | Putative uncharacterized protein                                              |     |
| Pc_TC018345 | 3.11  | 0     | Up   | 0     | 0.2       |      | 1.44  | 0.4  |      | 0.04  | 1     |      | Expressed protein                                                             |     |
| Pc_TC018355 | -3.57 | ##### | Down | 0.4   | 0.55      |      | -1.16 | 0.29 |      | -2.56 | 0     | Down | Expressed protein                                                             |     |
| Pc_TC018356 | -0.13 | 0.86  |      | -0.29 | 0.71      |      | -2.4  | 0.05 | Down | -1.45 | 0.07  |      | Expressed protein                                                             |     |
| Pc_TC018360 | 0.33  | 0.27  |      | 0.98  | 0.01      |      | -1.76 | 0.04 | Down | -0.82 | 0.1   |      | nitrate transporter 1.1                                                       |     |
| Pc_TC018370 | 2.31  | 0.01  | Up   | 0     | 0.07      |      | 1.64  | 0.25 |      | -0.24 | 0.94  |      | Proteasome component (PCI) domain protein                                     |     |
| Pc_TC018396 | -1.23 | 0.1   |      | -0.46 | 0.57      |      | -2.89 | 0.02 | Down | -0.98 | 0.23  |      | Expressed protein                                                             |     |
| Pc_TC018402 | 1.88  | 0.02  | Up   | -1.38 | 0.31      |      | 1.14  | 0.38 |      | -1.62 | 0.21  |      | Expressed protein                                                             |     |
| Pc_TC018427 | 3.08  | 0     | Up   | 0     | 0.15      |      | 1.98  | 0.19 |      | 1.14  | 0.41  |      | Expressed protein                                                             |     |
| Pc_TC018433 | 0.34  | 0.76  |      | 0.44  | 0.71      |      | -3.82 | 0.04 | Down | -2.37 | 0.08  |      | Uncharacterized protein                                                       |     |
| Pc_TC018437 | 3.28  | ##### | Up   | 0     | 0.03      |      | 3.17  | 0.01 | Up   | 0.88  | 0.45  |      | Uncharacterized protein                                                       |     |
| Pc_TC018440 | 1.78  | 0.1   |      | 2.27  | 0.04      | Up   | -1.5  | 0.5  |      | -0.05 | 1     |      | Expressed protein                                                             |     |
| Pc_TC018445 | 0.17  | 0.85  |      | -1.94 | 0.07      |      | -1.79 | 0.18 |      | -2.83 | 0.01  | Down | Expressed protein                                                             |     |
| Pc_TC018468 | 2.99  | ##### | Up   | 0     | 0.01      |      | 1.93  | 0.12 |      | 1.33  | 0.16  |      | Expressed protein                                                             |     |
| Pc_TC018486 | 0.48  | 0.57  |      | 0.27  | 0.8       |      | -4.45 | 0.01 | Down | -4.33 | 0     | Down | Expressed protein                                                             |     |
| Pc_TC018487 | 1.17  | 0.35  |      | 2.31  | 0.04      | Up   | -0.33 | 0.92 |      | 0.63  | 0.69  |      | Expressed protein                                                             |     |
| Pc_TC018491 | -0.45 | 0.51  |      | -0.47 | 0.55      |      | 2.06  | 0.05 | Up   | 1.25  | 0.08  |      | Zinc finger (C3HC4-type RING finger) family protein                           |     |
| Pc_TC018492 | 0.21  | 0.51  |      | 0.36  | 0.39      |      | -0.99 | 0.25 |      | -1.09 | 0.04  | Down | monogalactosyldiacylglycerol synthase 2                                       |     |
| Pc_TC018493 | -2.57 | 0.01  | Down | 0.87  | 0.28      |      | 0.01  | 1    |      | -0.5  | 0.58  |      | CP12 domain-containing protein 1                                              |     |
| Pc_TC018504 | 1.95  | 0.24  |      | 3.12  | 0.03      | Up   | 2.17  | 0.26 |      | 1.5   | 0.44  |      | Expressed protein                                                             |     |
| Pc_TC018516 | 0.36  | 0.28  |      | 0.45  | 0.29      |      | -1.5  | 0.09 |      | -1.16 | 0.03  | Down | rhamnose biosynthesis 1                                                       |     |
| Pc_TC018527 | -1.8  | 0     | Down | -2.08 | 0         | Down | -0.41 | 0.68 |      | 0.32  | 0.6   |      | Leucine-rich repeat protein kinase family protein                             |     |
| Pc_TC018528 | 4.5   | 0     | Up   | 0     | 0.67      |      | 3.55  | 0.05 |      | 2.08  | 0.3   |      | Expressed protein                                                             |     |
| Pc_TC018539 | 0.86  | 0.36  |      | 2.06  | 0.02      | Up   | -1.08 | 0.49 |      | -1.54 | 0.24  |      | Uncharacterized protein                                                       |     |
| Pc_TC018548 | 2.54  | 0.02  | Up   | 0     | 0.2       |      | 2.44  | 0.1  |      | -0.96 | 0.68  |      | serine carboxypeptidase-like 50                                               |     |
| Pc_TC018551 | 2.5   | 0.01  | Up   | 3.23  | 0         | Up   | 0     | 0.08 |      | -2.37 | 0.25  |      | Uncharacterized protein                                                       |     |
| Pc_TC018556 | 1.61  | 0.13  |      | 2.41  | 0.02      | Up   | -1.08 | 0.61 |      | 0.63  | 0.67  |      | Expressed protein                                                             |     |
| Pc_TC018561 | -0.29 | 0.82  |      | 1.58  | 0.08      |      | -2.15 | 0.17 |      | -2.83 | 0.04  | Down | Expressed protein                                                             |     |
| Pc_TC018562 | 0.53  | 0.46  |      | 1.52  | 0.04      | Up   | -3.47 | 0.01 | Down | -1.99 | 0.04  | Down | Expressed protein                                                             |     |
| Pc_TC018578 | 2.66  | 0.12  |      | 3.23  | 0.05      |      | 2.75  | 0.18 |      | 3.15  | 0.05  | Up   | Uncharacterized protein                                                       |     |
| Pc_TC018589 | 0.04  | 0.97  |      | 0.6   | 0.39      |      | 1.71  | 0.1  |      | 1.44  | 0.03  | Up   | Expressed protein                                                             |     |
| Pc_TC018600 | 2.1   | 0     | Up   | 0     | 0         |      | 0.43  | 0.75 |      | -0.37 | 0.73  |      | Expressed protein                                                             |     |
| Pc_TC018605 | 0.29  | 0.81  |      | 0.06  | 1         |      | -3.74 | 0.05 | Down | -1.45 | 0.25  |      | Uncharacterized protein                                                       |     |
| Pc_TC018606 | 2.95  | 0     | Up   | 0     | 0.04      |      | 1.28  | 0.37 |      | -0.15 | 0.97  |      | Expressed protein                                                             |     |
| Pc_TC018610 | -1.48 | 0.07  |      | -0.5  | 0.57      |      | -1.47 | 0.23 |      | -2.45 | 0.01  | Down | Expressed protein                                                             |     |
| Pc_TC018618 | -0.61 | 0.17  |      | -1.67 | 0         | Down | 0.31  | 0.74 |      | -0.07 | 0.91  |      | Expressed protein                                                             |     |
| Pc_TC018645 | -1.78 | 0.06  |      | -2.26 | 0.04      | Down | 0.49  | 0.69 |      | -1.17 | 0.23  |      | Expressed protein                                                             |     |
| Pc_TC018648 | 0.9   | 0.1   |      | 0.64  | 0.34      |      | -0.25 | 0.82 |      | 1.37  | 0.04  | Up   | malate synthase                                                               |     |
| Pc_TC018655 | -0.35 | 0.74  |      | 0.95  | 0.31      |      | -5.25 | 0.01 | Down | -2.13 | 0.07  |      | Expressed protein                                                             |     |
| Pc_TC018657 | 0.19  | 0.87  |      | 0.11  | 0.95      |      | -2.82 | 0.08 |      | -3.02 | 0.02  | Down | Expressed protein                                                             |     |
| Pc_TC018661 | 2.29  | 0     | Up   | 2.09  | 0.01      | Up   | -1.64 | 0.21 |      | -2.77 | 0.01  | Down | Expressed protein                                                             |     |
| Pc_TC018666 | -0.3  | 0.63  |      | 0.74  | 0.28      |      | -1.91 | 0.1  |      | -4.7  | ##### | Down | NAC (No Apical Meristem) domain transcriptional regulator superfamily protein | NAC |
| Pc_TC018673 | 2.48  | 0     | Up   | 0     | 0         |      | 1.31  | 0.3  |      | 0.45  | 0.67  |      | Expressed protein                                                             |     |
| Pc_TC018676 | -0.74 | 0.09  |      | -1.48 | 0.01      | Down | 1.08  | 0.23 |      | 0.6   | 0.29  |      | PENTATRICOPEPTIDE REPEAT 596                                                  |     |
| Pc_TC018691 | 1.75  | 0.01  | Up   | 0     | 0         |      | 0.41  | 0.74 |      | -1.03 | 0.28  |      | Expressed protein                                                             |     |
| Pc_TC018698 | -1.26 | 0.04  | Down | -0.66 | 0.34      |      | 0.42  | 0.68 |      | -0.58 | 0.41  |      | Expressed protein                                                             |     |
| Pc_TC018704 | -2.51 | 0.01  | Down | -3.7  | 0         | Down | -0.42 | 0.73 |      | -2.54 | 0.01  | Down | plasma membrane intrinsic protein 2;4                                         |     |
| Pc_TC018711 | -1.02 | 0.05  | Down | -0.08 | 0.9       |      | 2.71  | 0    | Up   | 1.71  | 0     | Up   | Glucose-methanol-choline (GMC) oxidoreductase family protein                  |     |
| Pc_TC018714 | 3.62  | ##### | Up   | 0     | 0.01      |      | 2.32  | 0.05 |      | 0.66  | 0.52  |      | Expressed protein                                                             |     |
| Pc_TC018718 | 0.4   | 0.78  |      | 2.2   | 0.03      | Up   | 0     | 0.03 |      | -1.96 | 0.22  |      | Uncharacterized protein                                                       |     |
| Pc_TC018721 | 3.31  | 0     | Up   | 0     | 0.27      |      | 3.33  | 0.02 | Up   | 1     | 0.56  |      | Uncharacterized protein                                                       |     |

|             |       |       |      |       |           |      |       |           |      |       |       |      |                                                                           |      |
|-------------|-------|-------|------|-------|-----------|------|-------|-----------|------|-------|-------|------|---------------------------------------------------------------------------|------|
| Pc_TC018724 | -0.71 | 0.4   |      | 0.76  | 0.36      |      | -3.18 | 0.03      | Down | -1.96 | 0.05  |      | Expressed protein                                                         |      |
| Pc_TC018728 | 2     | 0     | Up   | 0     | 0         |      | 1.41  | 0.22      |      | 0.08  | 0.96  |      | Expressed protein                                                         |      |
| Pc_TC018731 | 0.28  | 0.5   |      | 0.61  | 0.24      |      | -2    | 0.04      | Down | -1.38 | 0.03  | Down | Expressed protein                                                         |      |
| Pc_TC018733 | -0.37 | 0.66  |      | 0.81  | 0.32      |      | -1.99 | 0.13      |      | -2.06 | 0.04  | Down | Expressed protein                                                         |      |
| Pc_TC018737 | 0.63  | 0.03  |      | 1.02  | 0.01      | Up   | -3.7  | 4.58E-005 | Down | -1.88 | 0     | Down | HOPW1-1-interacting 2                                                     |      |
| Pc_TC018751 | 0.28  | 0.49  |      | 0.93  | 0.06      |      | -1.45 | 0.13      |      | -1.29 | 0.03  | Down | Expressed protein                                                         |      |
| Pc_TC018754 | 0.03  | 0.96  |      | 0.61  | 0.28      |      | -2.8  | 0.01      | Down | -1.6  | 0.02  | Down | Haloacid dehalogenase-like hydrolase (HAD) superfamily protein            |      |
| Pc_TC018757 | 0.18  | 0.88  |      | 0.38  | 0.72      |      | -4.3  | 0.02      | Down | -1.72 | 0.13  |      | Expressed protein                                                         |      |
| Pc_TC018772 | -0.79 | 0.41  |      | -0.57 | 0.6       |      | 2.67  | 0.02      | Up   | 0.72  | 0.43  |      | Expressed protein                                                         |      |
| Pc_TC018783 | 0.6   | 0.21  |      | 1.29  | 0.02      | Up   | -1.92 | 0.07      |      | -0.8  | 0.23  |      | Expressed protein                                                         |      |
| Pc_TC018787 | 0.03  | 0.98  |      | 0.44  | 0.53      |      | 1.17  | 0.26      |      | 1.4   | 0.04  | Up   | Uncharacterized protein                                                   |      |
| Pc_TC018788 | 0     | ##### |      | 0     | 1.02E-005 |      | -4.38 | 0         | Down | -2.45 | 0.01  | Down | GTP binding Elongation factor Tu family protein                           |      |
| Pc_TC018806 | 1.03  | 0.28  |      | 1.94  | 0.04      | Up   | -4.5  | 0.04      | Down | -0.79 | 0.55  |      | Uncharacterized protein                                                   |      |
| Pc_TC018809 | 2.05  | 0.03  | Up   | 1.24  | 0.29      |      | 0.85  | 0.59      |      | 1.49  | 0.17  |      | Expressed protein                                                         |      |
| Pc_TC018813 | 0.34  | 0.24  |      | 0.77  | 0.04      |      | -4.54 | 1.46E-006 | Down | -1.39 | 0     | Down | senescence-associated gene 29                                             |      |
| Pc_TC018817 | -1.73 | 0.16  |      | -0.16 | 0.93      |      | -2.08 | 0.19      |      | -4.77 | 0.01  | Down | Putative UDP-glucose:sterol glucosyltransferase                           |      |
| Pc_TC018830 | 2.78  | 0     | Up   | 0     | 0.11      |      | 1.83  | 0.22      |      | 0.87  | 0.54  |      | Expressed protein                                                         |      |
| Pc_TC018833 | 0.28  | 0.81  |      | 0.59  | 0.59      |      | -2.82 | 0.1       |      | -3.7  | 0.02  | Down | Expressed protein                                                         |      |
| Pc_TC018855 | 0.45  | 0.36  |      | 0.97  | 0.09      |      | -3.38 | 0         | Down | -1.45 | 0.04  | Down | Arabidopsis protein of unknown function (DUF241)                          |      |
| Pc_TC018857 | -0.15 | 0.87  |      | 0.7   | 0.4       |      | -1.83 | 0.16      |      | -2.15 | 0.03  | Down | Uncharacterized protein                                                   |      |
| Pc_TC018863 | 0.42  | 0.22  |      | 0.95  | 0.03      |      | -7.13 | 1.12E-009 | Down | -4.64 | ##### | Down | Uncharacterized protein                                                   |      |
| Pc_TC018869 | 2.85  | 0.01  | Up   | 0     | 0.2       |      | 2.17  | 0.16      |      | -0.37 | 0.93  |      | 20S proteasome beta subunit G1                                            |      |
| Pc_TC018892 | -1.21 | 0.12  |      | -1.35 | 0.14      |      | 2.88  | 0.01      | Up   | 0.82  | 0.29  |      | cell wall-associated kinase                                               |      |
| Pc_TC018898 | -0.02 | 0.99  |      | 0.78  | 0.22      |      | -2.84 | 0.01      | Down | -2.31 | 0     | Down | Pleckstrin-like,plant                                                     |      |
| Pc_TC018900 | 0.6   | 0.24  |      | -0.68 | 0.31      |      | 1.58  | 0.1       |      | 2.47  | ##### | Up   | beta-1,3-glucanase 3                                                      |      |
| Pc_TC018904 | -0.34 | 0.41  |      | -1.47 | 0.01      | Down | -2.39 | 0.02      | Down | -1.66 | 0.01  | Down | Nodulin MtN3 family protein                                               |      |
| Pc_TC018908 | 0.72  | 0.3   |      | 1.71  | 0.02      | Up   | -4.2  | 0.01      | Down | -2.17 | 0.03  | Down | OSJNBb0060E08.12 protein                                                  |      |
| Pc_TC018918 | -0.3  | 0.36  |      | -0.23 | 0.59      |      | -0.82 | 0.33      |      | -1.88 | 0     | Down | Expressed protein                                                         |      |
| Pc_TC018947 | -0.28 | 0.61  |      | 0.12  | 0.86      |      | 2.99  | 0         | Up   | 2.05  | 0     | Up   | plasmodesmata callose-binding protein 3                                   |      |
| Pc_TC018949 | -0.62 | 0.45  |      | -0.1  | 0.93      |      | -3.05 | 0.03      | Down | -1.76 | 0.07  |      | Expressed protein                                                         |      |
| Pc_TC018955 | -1.43 | 0.05  | Down | -1.13 | 0.17      |      | 0.14  | 0.91      |      | 0.01  | 1     |      | Expressed protein                                                         |      |
| Pc_TC018957 | -0.95 | 0.05  |      | -2.26 | 0         | Down | 1.39  | 0.13      |      | 0.64  | 0.28  |      | Protein kinase family protein with leucine-rich repeat domain             |      |
| Pc_TC018999 | 2.33  | 0     | Up   | 0     | 0         |      | 1.17  | 0.35      |      | 0.13  | 0.94  |      | Os01g0819700 protein                                                      |      |
| Pc_TC019000 | -0.03 | 0.94  |      | 0.25  | 0.57      |      | -0.97 | 0.27      |      | -1.26 | 0.02  | Down | RNA-binding (RRM/RBD/RNP motifs) family protein                           |      |
| Pc_TC019008 | -1.33 | 0     | Down | -0.3  | 0.58      |      | -0.33 | 0.73      |      | -0.26 | 0.67  |      | Uncharacterized protein                                                   |      |
| Pc_TC019009 | 0.86  | 0.3   |      | 1.25  | 0.17      |      | -4.14 | 0.02      | Down | -0.63 | 0.58  |      | Os05g0498300 protein                                                      |      |
| Pc_TC019015 | 2.27  | 0.01  | Up   | 0     | 0.04      |      | 1.2   | 0.4       |      | 0.13  | 0.98  |      | Expressed protein                                                         |      |
| Pc_TC019023 | 2.54  | 0     | Up   | 0     | 0         |      | 2.26  | 0.06      |      | -0.5  | 0.66  |      | glutamine synthetase 1.3                                                  |      |
| Pc_TC019028 | -0.41 | 0.3   |      | -1.04 | 0.04      | Down | 1.08  | 0.21      |      | 0.52  | 0.34  |      | unknown protein                                                           |      |
| Pc_TC019054 | 3.33  | 0     | Up   | 0     | 0.11      |      | 1.67  | 0.27      |      | 0.43  | 0.82  |      | 20S proteasome alpha subunit G1                                           |      |
| Pc_TC019065 | 3.91  | 0     | Up   | 0     | 0.36      |      | 3.43  | 0.02      | Up   | 2.63  | 0.05  | Up   | Expressed protein                                                         |      |
| Pc_TC019070 | 2.7   | 0.01  | Up   | 0     | 0.2       |      | 2.59  | 0.08      |      | 0.95  | 0.55  |      | Expressed protein                                                         |      |
| Pc_TC019077 | 0.78  | 0.27  |      | 1.56  | 0.04      | Up   | -0.27 | 0.84      |      | 1.02  | 0.2   |      | Expressed protein                                                         |      |
| Pc_TC019102 | 0.47  | 0.39  |      | 1.21  | 0.05      | Up   | -2.19 | 0.05      |      | -0.87 | 0.22  |      | gamma-glutamyl transpeptidase 4                                           |      |
| Pc_TC019115 | 0.44  | 0.2   |      | 0.19  | 0.68      |      | -2.1  | 0.02      | Down | -1.06 | 0.05  |      | Adenine nucleotide alpha hydrolases-like superfamily protein              |      |
| Pc_TC019116 | -4.51 | ##### | Down | -3.74 | 5.03E-009 | Down | -0.76 | 0.41      |      | -7.2  | ##### | Down | unknown protein                                                           |      |
| Pc_TC019139 | 1.89  | 0.03  | Up   | 1.54  | 0.14      |      | 0.78  | 0.6       |      | 1.8   | 0.07  |      | AMP-dependent synthetase and ligase family protein                        |      |
| Pc_TC019146 | -0.57 | 0.15  |      | -1.09 | 0.03      | Down | 1.85  | 0.03      | Up   | 0.99  | 0.06  |      | antitermination NusB domain-containing protein                            |      |
| Pc_TC019158 | -0.85 | 0.09  |      | 0.23  | 0.69      |      | -2.87 | 0.01      | Down | -3.16 | ##### | Down | germin-like protein 4                                                     |      |
| Pc_TC019177 | -0.68 | 0.51  |      | -0.11 | 0.96      |      | -4.25 | 0.02      | Down | -3.54 | 0.01  | Down | F-box domain containing protein,expressed                                 |      |
| Pc_TC019185 | 0.8   | 0.22  |      | 0.38  | 0.64      |      | -4.15 | 0         | Down | -0.65 | 0.45  |      | Expressed protein                                                         |      |
| Pc_TC019209 | -1.09 | 0.04  | Down | -1.73 | 0.01      | Down | 1.31  | 0.17      |      | -0.08 | 0.9   |      | Transcription elongation factor (TFIIIS) family protein                   | IWS1 |
| Pc_TC019210 | 2.82  | 0.04  | Up   | 0     | 0.48      |      | 2.44  | 0.19      |      | 1.63  | 0.38  |      | Expressed protein                                                         |      |
| Pc_TC019218 | 1.35  | 0.03  | Up   | 0.34  | 0.67      |      | -0.67 | 0.57      |      | 0.01  | 1     |      | glycerol-3-phosphate acyltransferase 3                                    |      |
| Pc_TC019223 | -0.05 | 0.94  |      | 0.26  | 0.68      |      | -0.95 | 0.36      |      | -1.64 | 0.02  | Down | Expressed protein                                                         |      |
| Pc_TC019229 | 0.7   | 0.08  |      | 1.62  | 0         | Up   | -1.08 | 0.26      |      | -0.28 | 0.64  |      | UDP-glucosyl transferase 85A2                                             |      |
| Pc_TC019235 | 2.8   | 0     | Up   | 0     | 0.03      |      | 1.05  | 0.47      |      | 0.01  | 1     |      | Expressed protein                                                         |      |
| Pc_TC019236 | -0.14 | 0.92  |      | 0.92  | 0.32      |      | -2.98 | 0.06      |      | -2.6  | 0.03  | Down | Protein of unknown function (DUF2921)                                     |      |
| Pc_TC019238 | 0.32  | 0.86  |      | 1.3   | 0.27      |      | 2.37  | 0.07      |      | 2.1   | 0.04  | Up   | MATE efflux family protein                                                |      |
| Pc_TC019247 | -0.05 | 0.96  |      | 0     | 1         |      | 2.65  | 0.01      | Up   | 1.31  | 0.07  |      | TRICHOME BIREFRINGENCE-LIKE 38                                            |      |
| Pc_TC019248 | 0.86  | 0.01  |      | 0.81  | 0.05      |      | -2.98 | 0         | Down | -0.64 | 0.22  |      | Core-2/-branching beta-1,6-N-acetylglucosaminyltransferase family protein |      |
| Pc_TC019251 | 0.6   | 0.12  |      | 0.95  | 0.05      |      | 0.6   | 0.5       |      | 1.24  | 0.02  | Up   | YELLOW STRIPE like 7                                                      |      |



|             |       |       |      |       |           |      |       |           |      |       |       |      |                                                                         |      |
|-------------|-------|-------|------|-------|-----------|------|-------|-----------|------|-------|-------|------|-------------------------------------------------------------------------|------|
| Pc_TC019257 | 2.81  | ##### | Up   | 0     | 4.49E-007 |      | 1.84  | 0.08      |      | 1.02  | 0.16  |      | actin depolymerizing factor 4                                           |      |
| Pc_TC019259 | 3.14  | ##### | Up   | 0     | 0.02      |      | 2.21  | 0.08      |      | 0.47  | 0.7   |      | Expressed protein                                                       |      |
| Pc_TC019267 | -0.1  | 0.88  |      | -0.05 | 0.96      |      | 1.96  | 0.05      |      | 1.33  | 0.05  | Up   | Putative uncharacterized protein                                        |      |
| Pc_TC019268 | 0.12  | 0.88  |      | 1.68  | 0.02      | Up   | -2.69 | 0.04      | Down | -0.89 | 0.28  |      | Expressed protein                                                       |      |
| Pc_TC019296 | -2.09 | 0.04  | Down | -0.79 | 0.45      |      | -0.62 | 0.64      |      | -1.02 | 0.31  |      | Expressed protein                                                       |      |
| Pc_TC019297 | -4.17 | 0.02  | Down | -2.19 | 0.14      |      | -0.04 | 1         |      | -1.3  | 0.3   |      | unknown protein                                                         |      |
| Pc_TC019305 | 0.55  | 0.08  |      | 1.18  | 0         | Up   | -1.64 | 0.06      |      | -0.03 | 0.96  |      | Expressed protein                                                       |      |
| Pc_TC019307 | 2.59  | 0     | Up   | 0     | 0.07      |      | 2.11  | 0.12      |      | 0.95  | 0.45  |      | Expressed protein                                                       |      |
| Pc_TC019308 | 0.71  | 0.45  |      | 0.69  | 0.52      |      | -3.82 | 0.04      | Down | -1.37 | 0.27  |      | Expressed protein                                                       |      |
| Pc_TC019311 | 0.87  | 0.05  |      | 0.83  | 0.13      |      | -2.31 | 0.03      | Down | -0.24 | 0.7   |      | Expressed protein                                                       |      |
| Pc_TC019327 | 2.08  | 0.04  | Up   | 1.52  | 0.23      |      | 1.09  | 0.51      |      | 0.43  | 0.82  |      | Uncharacterized protein                                                 |      |
| Pc_TC019345 | 0.3   | 0.69  |      | 1.9   | 0.01      | Up   | -3.64 | 0.01      | Down | -2.78 | 0.01  | Down | Expressed protein                                                       |      |
| Pc_TC019348 | -1.51 | 0.24  |      | 0.59  | 0.61      |      | -1.34 | 0.4       |      | -3.54 | 0.03  | Down | Expressed protein                                                       |      |
| Pc_TC019358 | 0.57  | 0.15  |      | 1.34  | 0         | Up   | -2.89 | 0         | Down | -0.58 | 0.32  |      | trehalose-phosphatase/synthase 9                                        |      |
| Pc_TC019370 | 1.19  | 0.02  | Up   | 1.43  | 0.02      | Up   | -1.05 | 0.32      |      | 0.09  | 0.9   |      | Expressed protein                                                       |      |
| Pc_TC019371 | 0.75  | 0.37  |      | 1     | 0.28      |      | -2.25 | 0.14      |      | -2.54 | 0.04  | Down | Leucine Rich Repeat family protein,expressed                            |      |
| Pc_TC019373 | 1.08  | 0.24  |      | 1.1   | 0.29      |      | 1.03  | 0.45      |      | 2.36  | 0.01  | Up   | calmodulin-binding family protein                                       |      |
| Pc_TC019380 | 1.01  | 0.1   |      | 2.39  | 0         | Up   | -1.58 | 0.19      |      | 0.61  | 0.43  |      | Expressed protein                                                       |      |
| Pc_TC019383 | -0.91 | 0.16  |      | 0.05  | 0.96      |      | 2.08  | 0.04      | Up   | 0.84  | 0.22  |      | O-methyltransferase family protein                                      |      |
| Pc_TC019388 | -0.54 | 0.51  |      | 1.25  | 0.11      |      | -1.47 | 0.25      |      | -1.99 | 0.04  | Down | Plant stearyl-acyl-carrier-protein desaturase family protein            |      |
| Pc_TC019389 | 0.53  | 0.09  |      | 1.11  | 0.01      | Up   | -4.93 | 6.86E-007 | Down | -2.09 | ##### | Down | Expressed protein                                                       |      |
| Pc_TC019403 | 3.08  | 0.05  | Up   | 0     | 0.67      |      | 2.5   | 0.25      |      | 0.63  | 0.96  |      | Thiamin diphosphate-binding fold (THDP-binding) superfamily protein     |      |
| Pc_TC019411 | -0.97 | 0.21  |      | -1.33 | 0.15      |      | 2.32  | 0.03      | Up   | 1.84  | 0.01  | Up   | Expressed protein                                                       |      |
| Pc_TC019414 | 0.08  | 0.98  |      | 0.5   | 0.63      |      | 0     | 0         |      | -3.02 | 0.02  | Down | Uncharacterized protein                                                 |      |
| Pc_TC019415 | 0.64  | 0.14  |      | -1.7  | 0.01      | Down | -0.54 | 0.57      |      | 1.27  | 0.03  | Up   | Terpenoid cyclases/Protein prenyltransferases superfamily protein       |      |
| Pc_TC019422 | 1.89  | 0.03  | Up   | 0     | 0.02      |      | 1.19  | 0.39      |      | -0.48 | 0.75  |      | Expressed protein                                                       |      |
| Pc_TC019428 | 0     | 0.03  |      | 0.64  | 0.63      |      | 2.79  | 0.03      | Up   | 1.59  | 0.13  |      | unknown protein                                                         |      |
| Pc_TC019433 | -0.48 | 0.52  |      | 0.31  | 0.71      |      | -4.61 | 0         | Down | -1.35 | 0.12  |      | Expressed protein                                                       |      |
| Pc_TC019439 | -1.16 | 0.04  | Down | -0.15 | 0.82      |      | -1.68 | 0.11      |      | -0.33 | 0.63  |      | Uncharacterized protein                                                 |      |
| Pc_TC019442 | 0.17  | 0.77  |      | 1.38  | 0.03      | Up   | -5.79 | 4.47E-005 | Down | -2.5  | 0     | Down | unknown protein                                                         |      |
| Pc_TC019445 | 0.14  | 0.88  |      | 0.38  | 0.67      |      | 1.97  | 0.07      |      | 2.01  | 0.01  | Up   | Protein of unknown function (DUF581)                                    |      |
| Pc_TC019448 | 1.4   | 0.4   |      | 2.76  | 0.04      | Up   | 2.63  | 0.11      |      | 2.21  | 0.12  |      | Expressed protein                                                       |      |
| Pc_TC019460 | 0.91  | 0.15  |      | 1.7   | 0.01      | Up   | -1.4  | 0.24      |      | 0.33  | 0.68  |      | WRKY DNA-binding protein 23                                             | WRKY |
| Pc_TC019462 | 3.03  | 0     | Up   | 0     | 0.15      |      | 2.28  | 0.12      |      | 0.63  | 0.72  |      | Expressed protein                                                       |      |
| Pc_TC019472 | -0.66 | 0.87  |      | -2.26 | 0.5       |      | 3.27  | 0.03      | Up   | 1.83  | 0.19  |      | Expressed protein                                                       |      |
| Pc_TC019477 | -0.72 | 0.03  |      | -1.27 | 0         | Down | 0.81  | 0.33      |      | 0.83  | 0.09  |      | Protein of unknown function (duplicated DUF1399)                        |      |
| Pc_TC019484 | 0.33  | 0.55  |      | 1.1   | 0.08      |      | -2.3  | 0.04      | Down | -3.38 | ##### | Down | Kinase interacting (KIP1-like) family protein                           |      |
| Pc_TC019490 | 0.75  | 0.12  |      | 1.04  | 0.07      |      | 1.3   | 0.17      |      | 1.58  | 0.01  | Up   | alpha-L-arabinofuranosidase 1                                           |      |
| Pc_TC019498 | 0.56  | 0.23  |      | 0     | 1         |      | 0.67  | 0.49      |      | 1.55  | 0.01  | Up   | cinnamoyl coa reductase 1                                               |      |
| Pc_TC019503 | -1.07 | 0.36  |      | 0.26  | 0.85      |      | 0     | 0.01      |      | -3.7  | 0.02  | Down | Expressed protein                                                       |      |
| Pc_TC019516 | -2.59 | 0     | Down | 0.14  | 0.88      |      | -2.17 | 0.08      |      | -3.18 | 0     | Down | Expressed protein                                                       |      |
| Pc_TC019520 | -0.78 | 0.25  |      | -1.8  | 0.03      | Down | 1.11  | 0.29      |      | -0.43 | 0.58  |      | unknown protein                                                         |      |
| Pc_TC019528 | 3.28  | ##### | Up   | 0     | 0.05      |      | 2     | 0.14      |      | 1.07  | 0.36  |      | Uncharacterized protein                                                 |      |
| Pc_TC019538 | 0.74  | 0.53  |      | 3.01  | 0         | Up   | 0     | 0.03      |      | 0     | 0.02  |      | Putative uncharacterized protein                                        |      |
| Pc_TC019544 | 0.96  | 0.11  |      | 1.02  | 0.15      |      | -4.35 | 0         | Down | -1.23 | 0.13  |      | Putative uncharacterized protein P0605D08.33                            |      |
| Pc_TC019551 | -1.51 | 0.54  |      | 3.15  | 0         | Up   | 0     | 0.14      |      | 0     | 0.11  |      | Uncharacterized protein                                                 |      |
| Pc_TC019555 | 0.38  | 0.74  |      | 0.43  | 0.74      |      | 2.47  | 0.04      | Up   | 1.75  | 0.06  |      | Expressed protein                                                       |      |
| Pc_TC019601 | 2.39  | 0     | Up   | 0     | 0         |      | 1.92  | 0.09      |      | 1.01  | 0.24  |      | Insulinase (Peptidase family M16) protein                               |      |
| Pc_TC019605 | -0.18 | 0.87  |      | 0.63  | 0.48      |      | -3.71 | 0.02      | Down | -2.58 | 0.02  | Down | putative,unclassified                                                   |      |
| Pc_TC019607 | -0.7  | 0.66  |      | 2.06  | 0.04      | Up   | 0.01  | 1         |      | -0.96 | 0.53  |      | Expressed protein                                                       |      |
| Pc_TC019612 | -1.88 | 0.01  | Down | -1.9  | 0.02      | Down | 1.98  | 0.06      |      | 0.62  | 0.39  |      | Expressed protein                                                       |      |
| Pc_TC019615 | -1.57 | 0.08  |      | -0.49 | 0.61      |      | 2.33  | 0.03      | Up   | 1.71  | 0.03  | Up   | HMG (high mobility group) box protein                                   | HMG  |
| Pc_TC019627 | 3.13  | ##### | Up   | 0     | 1.98E-006 |      | 2.16  | 0.04      | Up   | -0.05 | 0.96  |      | calreticulin 1a                                                         |      |
| Pc_TC019628 | -1.86 | 0.12  |      | -2.88 | 0.05      | Down | -1.32 | 0.37      |      | -1.9  | 0.12  |      | Putative polyprotein                                                    |      |
| Pc_TC019631 | 1.84  | ##### | Up   | 0     | 3.76E-016 |      | 1.7   | 0.07      |      | 0.04  | 0.95  |      | NADH dehydrogenase 5B                                                   |      |
| Pc_TC019640 | 0.93  | 0.6   |      | 3.02  | 0.01      | Up   | -1.23 | 0.68      |      | 2.11  | 0.11  |      | Uncharacterized protein                                                 |      |
| Pc_TC019657 | -1.01 | 0.02  | Down | -0.51 | 0.34      |      | 1.92  | 0.03      | Up   | 0.99  | 0.07  |      | kinase interacting (KIP1-like) family protein                           |      |
| Pc_TC019660 | -0.35 | 0.74  |      | -0.05 | 1         |      | -4.25 | 0.02      | Down | -2.13 | 0.07  |      | Expressed protein                                                       |      |
| Pc_TC019665 | -0.45 | 0.39  |      | -1.83 | 0.01      | Down | 0.51  | 0.61      |      | 0.1   | 0.88  |      | Putative retroelement                                                   |      |
| Pc_TC019674 | -0.87 | 0.26  |      | 0.11  | 0.92      |      | -1.83 | 0.15      |      | -3.23 | 0     | Down | cDNA clone:001-036-H04,full insert sequence                             |      |
| Pc_TC019683 | -2.17 | 0.11  |      | -4.19 | 0.03      | Down | -0.66 | 0.68      |      | -1.16 | 0.35  |      | NB-ARC domain-containing disease resistance protein                     |      |
| Pc_TC019713 | -2.86 | 0     | Down | -2.01 | 0.05      |      | -1.5  | 0.25      |      | -2.73 | 0.01  | Down | protein kinase family protein / C-type lectin domain-containing protein |      |

|             |       |       |      |       |      |      |       |      |      |       |      |      |                                                                           |             |
|-------------|-------|-------|------|-------|------|------|-------|------|------|-------|------|------|---------------------------------------------------------------------------|-------------|
| Pc_TC019742 | 1.08  | 0.97  |      | 3.96  | 0.05 | Up   | 4.09  | 0.06 |      | 3.95  | 0.04 | Up   | acetoacetyl-CoA thiolase 2                                                |             |
| Pc_TC019750 | -4.03 | ##### | Down | -1.22 | 0.1  |      | 0.02  | 0.99 |      | -0.06 | 0.94 |      | unknown protein                                                           |             |
| Pc_TC019751 | 1.75  | 0.01  | Up   | 0.64  | 0.49 |      | 1.27  | 0.28 |      | 1.3   | 0.12 |      | unknown protein                                                           |             |
| Pc_TC019757 | 1.38  | 0.06  |      | 1.47  | 0.08 |      | 0.06  | 0.99 |      | 1.75  | 0.03 | Up   | Protein kinase superfamily protein                                        |             |
| Pc_TC019762 | -0.88 | 0.35  |      | -2.99 | 0.02 | Down | -0.84 | 0.53 |      | -1.72 | 0.11 |      | S-domain-2 5                                                              |             |
| Pc_TC019763 | -1.59 | 0.01  | Down | -2.4  | 0    | Down | 0.15  | 0.89 |      | -0.54 | 0.45 |      | PR5-like receptor kinase                                                  |             |
| Pc_TC019784 | 0.25  | 0.87  |      | -1.94 | 0.21 |      | 2.98  | 0.01 | Up   | 1.8   | 0.06 |      | nodulin MtN21 /EamA-like transporter family protein                       |             |
| Pc_TC019795 | 0.58  | 0.58  |      | 0.88  | 0.42 |      | 2.3   | 0.06 |      | 1.86  | 0.05 | Up   | Glycosyltransferase family 61 protein                                     |             |
| Pc_TC019810 | 2.11  | 0     | Up   | 1.02  | 0.18 |      | -0.62 | 0.6  |      | 1.49  | 0.04 | Up   | UniRef100                                                                 |             |
| Pc_TC019817 | -0.73 | 0.29  |      | -1.08 | 0.19 |      | 2.1   | 0.04 | Up   | 1.02  | 0.16 |      | MYB-like 2                                                                | MYB-related |
| Pc_TC019823 | 0.67  | 0.07  |      | 0.96  | 0.04 |      | -2.57 | 0.01 | Down | -1.96 | 0    | Down | abscisic acid (aba)-deficient 4                                           |             |
| Pc_TC019829 | 0.74  | 0.05  |      | 1.11  | 0.02 | Up   | -1.79 | 0.06 |      | 0.13  | 0.82 |      | Cation efflux family protein                                              |             |
| Pc_TC019830 | 0.2   | 0.57  |      | 0.19  | 0.67 |      | -2.04 | 0.03 | Down | -0.56 | 0.3  |      | Cation efflux family protein                                              |             |
| Pc_TC019844 | 0.66  | 0.27  |      | 2.19  | 0    | Up   | -0.18 | 0.88 |      | 0.37  | 0.63 |      | plastidic GLC translocator                                                |             |
| Pc_TC019846 | 0.08  | 0.88  |      | -0.61 | 0.33 |      | -1.35 | 0.19 |      | -1.37 | 0.04 | Down | Metallo-hydrolase/oxidoreductase superfamily protein                      |             |
| Pc_TC019852 | 0.82  | 0.04  |      | 1.72  | 0    | Up   | -4.04 | 0    | Down | -2.13 | 0    | Down | EF hand calcium-binding protein family                                    |             |
| Pc_TC019853 | 0.62  | 0.38  |      | 2.12  | 0    | Up   | -3.05 | 0.03 | Down | -1.93 | 0.04 | Down | heat shock protein 18.2                                                   |             |
| Pc_TC019860 | 2.72  | 0.03  | Up   | 3.38  | 0.01 | Up   | 1.83  | 0.32 |      | 2.15  | 0.13 |      | Protein kinase superfamily protein                                        |             |
| Pc_TC019870 | 0.54  | 0.45  |      | 0.14  | 0.89 |      | 2.5   | 0.02 | Up   | 1.87  | 0.01 | Up   | Di-glucose binding protein with Leucine-rich repeat domain                |             |
| Pc_TC019872 | 0.69  | 0.15  |      | -0.24 | 0.71 |      | 1.18  | 0.22 |      | 1.41  | 0.02 | Up   | related to ABI3/VP1 2                                                     | AP2-EREBP   |
| Pc_TC019876 | -0.99 | 0.05  |      | -1.32 | 0.04 | Down | 1.33  | 0.16 |      | 0.48  | 0.43 |      | Protein of unknown function,DUF647                                        |             |
| Pc_TC019878 | -0.68 | 0.21  |      | -1.81 | 0.01 | Down | 1.08  | 0.27 |      | -1.23 | 0.08 |      | sulfoquinovosyl diacylglycerol 2                                          |             |
| Pc_TC019885 | -1.72 | 0.05  | Down | -1.55 | 0.11 |      | 0.98  | 0.38 |      | 0.35  | 0.68 |      | Mitochondrial glycoprotein family protein                                 |             |
| Pc_TC019886 | -0.8  | 0.04  |      | -1.46 | 0    | Down | 2.1   | 0.02 | Up   | 1.11  | 0.03 | Up   | Mitochondrial glycoprotein family protein                                 |             |
| Pc_TC019896 | 1.43  | 0.16  |      | 1.24  | 0.29 |      | 0.74  | 0.64 |      | 2.05  | 0.05 | Up   | XH/XS domain-containing protein                                           |             |
| Pc_TC019905 | -2.03 | 0.02  | Down | -1.66 | 0.08 |      | -0.13 | 0.92 |      | -1.66 | 0.07 |      | NB-ARC domain-containing disease resistance protein                       |             |
| Pc_TC019908 | 0.89  | 0.12  |      | 0.8   | 0.24 |      | 0.68  | 0.52 |      | 1.38  | 0.04 | Up   | Protein of unknown function (DUF3741)                                     |             |
| Pc_TC019921 | 0.92  | 0.1   |      | 1.82  | 0    | Up   | -1.25 | 0.26 |      | 0.41  | 0.56 |      | alpha/beta-Hydrolases superfamily protein                                 |             |
| Pc_TC019923 | 2.1   | 0.01  | Up   | 1.45  | 0.15 |      | -0.33 | 0.86 |      | 0.98  | 0.35 |      | S-locus lectin protein kinase family protein                              |             |
| Pc_TC019936 | -0.14 | 0.81  |      | 0.96  | 0.11 |      | -3.36 | 0    | Down | -0.71 | 0.3  |      | RING/U-box superfamily protein                                            |             |
| Pc_TC019937 | 0.26  | 0.47  |      | 0.71  | 0.12 |      | -1.83 | 0.05 | Down | -0.69 | 0.21 |      | RING/U-box superfamily protein                                            |             |
| Pc_TC019951 | 0.42  | 0.32  |      | 0.91  | 0.08 |      | -1.57 | 0.11 |      | -1.51 | 0.02 | Down | BRCA2-like B                                                              |             |
| Pc_TC019953 | 0.25  | 0.55  |      | 1.03  | 0.04 | Up   | -1.7  | 0.08 |      | -0.82 | 0.18 |      | unknown protein                                                           |             |
| Pc_TC019958 | 1.4   | 0.16  |      | 3.15  | 0    | Up   | -0.5  | 0.8  |      | -0.5  | 0.76 |      | LOB domain protein                                                        |             |
| Pc_TC019994 | 2.01  | 0.03  | Up   | 0.69  | 0.62 |      | 2.64  | 0.04 | Up   | 1.81  | 0.09 |      | Lactoylglutathione lyase / glyoxalase I family protein                    |             |
| Pc_TC020005 | 1.36  | 0     | Up   | 0.87  | 0.09 |      | -1.3  | 0.18 |      | 2.06  | 0    | Up   | UDP-glucosyl transferase 73C6                                             |             |
| Pc_TC020022 | 1.16  | 0.33  |      | 2.84  | 0.01 | Up   | 0.73  | 0.68 |      | 1.7   | 0.13 |      | HXXXD-type acyl-transferase family protein                                |             |
| Pc_TC020036 | -1.99 | 0.03  | Down | -2.47 | 0.02 | Down | -0.38 | 0.77 |      | -1.31 | 0.17 |      | WRKY DNA-binding protein 13                                               | WRKY        |
| Pc_TC020037 | 2.58  | 0.01  | Up   | 1.84  | 0.11 |      | 2.11  | 0.13 |      | 2.21  | 0.04 | Up   | WRKY DNA-binding protein 13                                               | WRKY        |
| Pc_TC020042 | 0.47  | 0.53  |      | 1.89  | 0.01 | Up   | -1.53 | 0.24 |      | -0.82 | 0.38 |      | 17.6 kDa class II heat shock protein                                      |             |
| Pc_TC020043 | 0.46  | 0.58  |      | 1.6   | 0.05 |      | -3.22 | 0.04 | Down | -1.61 | 0.13 |      | 17.6 kDa class II heat shock protein                                      |             |
| Pc_TC020048 | 1.01  | 0.18  |      | 0.63  | 0.5  |      | -0.02 | 1    |      | 1.78  | 0.03 | Up   | WRKY DNA-binding protein 72                                               | WRKY        |
| Pc_TC020053 | 0.55  | 0.41  |      | 1.05  | 0.16 |      | -5.5  | 0    | Down | -2.37 | 0.01 | Down | unknown protein                                                           |             |
| Pc_TC020066 | -0.47 | 0.27  |      | -0.79 | 0.14 |      | 2.02  | 0.02 | Up   | 1.23  | 0.03 | Up   | HAD superfamily,subfamily IIIB acid phosphatase                           |             |
| Pc_TC020075 | -0.73 | 0.1   |      | -1.22 | 0.03 | Down | 1.69  | 0.06 |      | 0.95  | 0.09 |      | RNA methyltransferase family protein                                      |             |
| Pc_TC020077 | 0.37  | 0.34  |      | 1.07  | 0.02 | Up   | -2.01 | 0.04 | Down | -1.65 | 0.01 | Down | unknown protein                                                           |             |
| Pc_TC020081 | -0.09 | 0.91  |      | -0.16 | 0.85 |      | 2.53  | 0.01 | Up   | 1.23  | 0.08 |      | Late embryogenesis abundant (LEA) hydroxyproline-rich glycoprotein family |             |
| Pc_TC020104 | -0.5  | 0.11  |      | -1.32 | 0    | Down | 0.95  | 0.25 |      | -0.08 | 0.87 |      | metallothionein 3                                                         |             |
| Pc_TC020116 | 1.23  | 0.05  |      | 1.62  | 0.03 | Up   | -0.86 | 0.48 |      | -0.19 | 0.84 |      | Plant protein of unknown function (DUF641)                                |             |
| Pc_TC020122 | -0.62 | 0.36  |      | -0.9  | 0.27 |      | 2.26  | 0.03 | Up   | 1.27  | 0.07 |      | putative                                                                  |             |
| Pc_TC020148 | 0.3   | 0.95  |      | 0.28  | 0.97 |      | 2.9   | 0.05 | Up   | 1.36  | 0.33 |      | Basic-leucine zipper (bZIP) transcription factor family protein           | bZIP        |
| Pc_TC020153 | 0.44  | 0.37  |      | 1.16  | 0.04 | Up   | -0.61 | 0.55 |      | 0.27  | 0.67 |      | GDSL-like Lipase/Acylhydrolase superfamily protein                        |             |
| Pc_TC020161 | -0.29 | 0.73  |      | 0.22  | 0.81 |      | 0.9   | 0.43 |      | 1.56  | 0.04 | Up   | Class I glutamine amidotransferase-like superfamily protein               |             |
| Pc_TC020165 | 0.03  | 0.99  |      | -0.32 | 0.72 |      | 2.49  | 0.02 | Up   | 1.39  | 0.06 |      | tetratricopetide-repeat thioredoxin-like 3                                | TPR         |
| Pc_TC020179 | -1.33 | 0.05  | Down | -2.07 | 0.01 | Down | 0.86  | 0.41 |      | -0.75 | 0.32 |      | aluminum-activated malate transporter 9                                   |             |
| Pc_TC020188 | 0.47  | 0.35  |      | 0.09  | 0.89 |      | 1.33  | 0.17 |      | 1.45  | 0.02 | Up   | S-domain-1 13                                                             |             |
| Pc_TC020195 | 1.57  | 0.03  | Up   | 1.46  | 0.08 |      | -0.08 | 0.97 |      | 0.69  | 0.44 |      | smr (Small MutS Related) domain-containing protein                        |             |
| Pc_TC020217 | 0.44  | 0.39  |      | 0.43  | 0.49 |      | -3.43 | 0    | Down | -1.71 | 0.02 | Down | Late embryogenesis abundant protein,group 2                               |             |
| Pc_TC020250 | -0.7  | 0.52  |      | -2.94 | 0.04 | Down | 0.31  | 0.84 |      | -0.37 | 0.75 |      | Uncharacterized protein                                                   |             |
| Pc_TC020261 | -0.42 | 0.42  |      | -1.4  | 0.04 | Down | 1.27  | 0.19 |      | 0.17  | 0.8  |      | phosphoglycerate/bisphosphoglycerate mutase family protein                |             |
| Pc_TC020269 | 3.25  | 0.14  |      | 2.64  | 0.36 |      | 4.03  | 0.07 |      | 5.05  | 0    | Up   | Putative uncharacterized protein                                          |             |
| Pc_TC020274 | 0.15  | 0.68  |      | -0.3  | 0.52 |      | 1.91  | 0.03 | Up   | 1.67  | 0    | Up   | Glucose-6-phosphate/phosphate translocator-related                        |             |

|             |       |       |      |  |       |           |      |  |       |      |      |       |      |      |                                                                   |          |
|-------------|-------|-------|------|--|-------|-----------|------|--|-------|------|------|-------|------|------|-------------------------------------------------------------------|----------|
| Pc_TC020275 | -0.1  | 0.75  |      |  | -0.69 | 0.08      |      |  | 1.56  | 0.06 |      | 1.2   | 0.01 | Up   | Glucose-6-phosphate/phosphate translocator-related                |          |
| Pc_TC020276 | -1.84 | 0     | Down |  | -2.97 | 1.10E-005 | Down |  | -0.71 | 0.46 |      | -2.02 | 0    | Down | Glucose-6-phosphate/phosphate translocator-related                |          |
| Pc_TC020280 | 1.3   | 0.53  |      |  | 2.06  | 0.24      |      |  | 2.09  | 0.29 |      | 2.95  | 0.04 | Up   | C2H2-like zinc finger protein                                     |          |
| Pc_TC020295 | 0.76  | 0.02  |      |  | 1.08  | 0.01      | Up   |  | -1.28 | 0.15 |      | 0.19  | 0.71 |      | WRKY family transcription factor                                  | WRKY     |
| Pc_TC020300 | 0.44  | 0.84  |      |  | 0.57  | 0.77      |      |  | 2.85  | 0.04 | Up   | 1.95  | 0.1  |      | germin-like protein 10                                            |          |
| Pc_TC020309 | 0.08  | 1     |      |  | 1.15  | 0.41      |      |  | 4.65  | 0    | Up   | 3.2   | 0    | Up   | Os01g0252250 protein                                              |          |
| Pc_TC020316 | 0.64  | 0.03  |      |  | 0.81  | 0.03      |      |  | -2.17 | 0.01 | Down | -0.44 | 0.37 |      | alpha/beta-Hydrolases superfamily protein                         |          |
| Pc_TC020341 | -1.83 | 0.05  | Down |  | 0.03  | 1         |      |  | 1.4   | 0.22 |      | 0.36  | 0.68 |      | unknown protein                                                   |          |
| Pc_TC020353 | 1.28  | 0.02  | Up   |  | 1.25  | 0.06      |      |  | -0.16 | 0.89 |      | -0.27 | 0.72 |      | PQ-loop repeat family protein / transmembrane family protein      |          |
| Pc_TC020364 | 0.84  | 0.17  |      |  | 1.66  | 0.01      | Up   |  | 0.32  | 0.78 |      | 1.37  | 0.06 |      | Aldolase superfamily protein                                      |          |
| Pc_TC020366 | -1.62 | 0.02  | Down |  | -1.93 | 0.02      | Down |  | -1.78 | 0.11 |      | -1.64 | 0.04 | Down | actin-related protein 6                                           |          |
| Pc_TC020367 | 0.3   | 0.31  |      |  | 0.38  | 0.32      |      |  | -1.47 | 0.08 |      | -1.04 | 0.04 | Down | cystatin B                                                        |          |
| Pc_TC020372 | 1.19  | 0.4   |      |  | 1.28  | 0.4       |      |  | 2.73  | 0.06 |      | 2.56  | 0.03 | Up   | ubiquitin-conjugating enzyme 20                                   |          |
| Pc_TC020380 | 1     | 0.06  |      |  | 2.12  | 0         | Up   |  | 0.56  | 0.59 |      | 1.22  | 0.07 |      | isocitrate dehydrogenase V                                        |          |
| Pc_TC020389 | 0.92  | 0.04  |      |  | 1.08  | 0.05      | Up   |  | -2.36 | 0.03 | Down | -1.26 | 0.05 |      | DnaJ protein-like                                                 |          |
| Pc_TC020392 | 0.02  | 1     |      |  | 0.16  | 0.84      |      |  | -4.04 | 0    | Down | -3.33 | 0    | Down | Os01g0281100 protein                                              |          |
| Pc_TC020399 | -2.34 | 0     | Down |  | -0.28 | 0.72      |      |  | -2.38 | 0.05 | Down | -3.15 | 0    | Down | bZIP transcription factor family protein                          | bZIP     |
| Pc_TC020400 | -0.73 | 0.76  |      |  | 3.55  | 0         | Up   |  | -0.3  | 0.95 |      | 1.14  | 0.41 |      | Translation initiation factor IF6                                 |          |
| Pc_TC020407 | -0.08 | 0.81  |      |  | -0.23 | 0.61      |      |  | 1.85  | 0.03 | Up   | 0.77  | 0.13 |      | beta-6 tubulin                                                    |          |
| Pc_TC020410 | 0.63  | 0.04  |      |  | 0.49  | 0.23      |      |  | -1.98 | 0.02 | Down | -1.08 | 0.04 | Down | Os01g0293600 protein                                              |          |
| Pc_TC020414 | 0.58  | 0.58  |      |  | 0.67  | 0.56      |      |  | 2.13  | 0.09 |      | 1.93  | 0.04 | Up   | indole-3-acetic acid inducible 31                                 | AUX/IAA  |
| Pc_TC020422 | 3.17  | 0.04  | Up   |  | 3.7   | 0.02      | Up   |  | 3.5   | 0.06 |      | 2.21  | 0.26 |      | HXXXD-type acyl-transferase family protein                        |          |
| Pc_TC020426 | 0.12  | 0.79  |      |  | 1.04  | 0.04      | Up   |  | -1.84 | 0.07 |      | -0.24 | 0.69 |      | CBL-interacting protein kinase 1                                  |          |
| Pc_TC020427 | 0.33  | 0.61  |      |  | 0.84  | 0.24      |      |  | -1.8  | 0.13 |      | -2.12 | 0.02 | Down | CBL-interacting protein kinase 1                                  |          |
| Pc_TC020438 | 0.52  | 0.21  |      |  | 1.41  | 0         | Up   |  | -0.29 | 0.75 |      | 0.36  | 0.54 |      | shaggy-related kinase 11                                          |          |
| Pc_TC020439 | -1.93 | ##### | Down |  | -2.53 | 2.84E-006 | Down |  | -2.44 | 0.01 | Down | -2.19 | 0    | Down | shaggy-related kinase 11                                          |          |
| Pc_TC020440 | -1.21 | 0     | Down |  | 0.95  | 0.04      |      |  | 0.57  | 0.51 |      | -1.46 | 0.01 | Down | shaggy-related kinase 11                                          |          |
| Pc_TC020443 | 1.71  | 0.09  |      |  | 2.23  | 0.04      | Up   |  | 0.18  | 0.97 |      | 1.51  | 0.18 |      | myb domain protein 78                                             | MYB      |
| Pc_TC020458 | 0.8   | 0.02  |      |  | 1.11  | 0.01      | Up   |  | -2.59 | 0.01 | Down | -2.21 | 0    | Down | RING/FYVE/PHD zinc finger superfamily protein                     |          |
| Pc_TC020459 | -0.48 | 0.64  |      |  | 0.84  | 0.37      |      |  | 3.91  | 0    | Up   | 1.16  | 0.19 |      | Adenine nucleotide alpha hydrolases-like superfamily protein      |          |
| Pc_TC020460 | 0.08  | 1     |      |  | 0.47  | 0.86      |      |  | 3.22  | 0.02 | Up   | 3.31  | 0    | Up   | Adenine nucleotide alpha hydrolases-like superfamily protein      |          |
| Pc_TC020483 | 1.06  | 0.11  |      |  | 1.69  | 0.02      | Up   |  | -2.42 | 0.07 |      | -0.2  | 0.84 |      | senescence-associated gene 21                                     |          |
| Pc_TC020490 | -0.92 | 0.83  |      |  | 1.06  | 0.62      |      |  | 3.71  | 0.01 | Up   | 1.21  | 0.5  |      | sequence-specific DNA binding transcription factors               | Trihelix |
| Pc_TC020515 | -1.25 | 0.07  |      |  | 1.1   | 0.1       |      |  | -3.38 | 0.01 | Down | -1.93 | 0.02 | Down | Plant neutral invertase family protein                            |          |
| Pc_TC020524 | 3.21  | 0     | Up   |  | 4.06  | 0         | Up   |  | 0     | 0.26 |      | 1.08  | 0.57 |      | terpene synthase 21                                               |          |
| Pc_TC020525 | 1.48  | 0.05  | Up   |  | 1.67  | 0.05      | Up   |  | -1.6  | 0.26 |      | 0.42  | 0.67 |      | Inorganic H pyrophosphatase family protein                        |          |
| Pc_TC020549 | 0.49  | 0.24  |      |  | 0.58  | 0.26      |      |  | -1.54 | 0.11 |      | -1.36 | 0.03 | Down | Putative polyprotein                                              |          |
| Pc_TC020568 | -0.02 | 1     |      |  | 1.94  | 0.01      | Up   |  | -1.5  | 0.25 |      | 1.84  | 0.02 | Up   | nitrite reductase 1                                               |          |
| Pc_TC020577 | 1.67  | 0.01  | Up   |  | 0.32  | 0.73      |      |  | -0.9  | 0.48 |      | 0.47  | 0.58 |      | respiratory burst oxidase homolog B                               |          |
| Pc_TC020586 | -0.06 | 0.89  |      |  | -1.05 | 0.05      | Down |  | 0.47  | 0.6  |      | 0.15  | 0.79 |      | NAD(P)-binding Rossmann-fold superfamily protein                  |          |
| Pc_TC020596 | 0.83  | 0.04  |      |  | 1.37  | 0.01      | Up   |  | -1.54 | 0.12 |      | -0.24 | 0.69 |      | Glutathione S-transferase family protein                          |          |
| Pc_TC020597 | 0.47  | 0.22  |      |  | 0.54  | 0.26      |      |  | -2.09 | 0.03 | Down | -0.42 | 0.46 |      | 12-oxophytodienoate reductase 2                                   |          |
| Pc_TC020645 | 0.64  | 0.26  |      |  | 1.65  | 0.01      | Up   |  | -3.42 | 0.01 | Down | -1.94 | 0.02 | Down | Glycosyltransferase family 61 protein                             |          |
| Pc_TC020653 | -0.06 | 0.89  |      |  | 0.09  | 0.86      |      |  | 2.02  | 0.02 | Up   | 1.02  | 0.06 |      | photosystem II subunit O-2                                        |          |
| Pc_TC020658 | 1.89  | 0.03  | Up   |  | 1.11  | 0.32      |      |  | 3.43  | 0.01 | Up   | 3.34  | 0    | Up   | natural resistance-associated macrophage protein 1                |          |
| Pc_TC020660 | -1.07 | 0.08  |      |  | -1.69 | 0.02      | Down |  | 1.27  | 0.2  |      | 0.35  | 0.61 |      | natural resistance-associated macrophage protein 1                |          |
| Pc_TC020677 | 2.08  | 0.07  |      |  | 1.56  | 0.27      |      |  | 2.98  | 0.04 | Up   | 2.77  | 0.01 | Up   | Expressed protein                                                 |          |
| Pc_TC020678 | -1.02 | 0.01  | Down |  | -0.79 | 0.13      |      |  | -0.09 | 0.92 |      | 0.04  | 0.95 |      | MAP kinase kinase 6                                               |          |
| Pc_TC020681 | 0.41  | 0.39  |      |  | 0.33  | 0.58      |      |  | 2.06  | 0.03 | Up   | 0.53  | 0.39 |      | LOB domain-containing protein 40                                  | LOB      |
| Pc_TC020682 | 0.54  | 0.06  |      |  | 0.4   | 0.28      |      |  | -2.17 | 0.01 | Down | -0.62 | 0.2  |      | Adenine nucleotide alpha hydrolases-like superfamily protein      |          |
| Pc_TC020691 | 0.33  | 0.27  |      |  | 0.52  | 0.18      |      |  | -2.38 | 0.01 | Down | -1.45 | 0    | Down | Protein of unknown function (DUF789)                              |          |
| Pc_TC020714 | -0.38 | 0.45  |      |  | -0.93 | 0.13      |      |  | 1.85  | 0.05 | Up   | 1.09  | 0.07 |      | RNA-dependent RNA polymerase 6                                    |          |
| Pc_TC020721 | 0.35  | 0.64  |      |  | -2.86 | 0.01      | Down |  | 1.18  | 0.29 |      | 0.54  | 0.51 |      | kinase interacting family protein                                 |          |
| Pc_TC020731 | -3.24 | 0.01  | Down |  | -1.68 | 0.15      |      |  | -1.32 | 0.34 |      | -0.19 | 0.87 |      | high-affinity K+ transporter 1                                    |          |
| Pc_TC020753 | -1.15 | 0.02  | Down |  | -1.15 | 0.06      |      |  | 1.43  | 0.12 |      | -0.18 | 0.77 |      | Minichromosome maintenance (MCM2/3/5) family protein              |          |
| Pc_TC020762 | 0.67  | 0.05  |      |  | 0.86  | 0.05      |      |  | -2.04 | 0.03 | Down | -0.57 | 0.29 |      | cysteine-rich RLK (RECEPTOR-like protein kinase) 2                |          |
| Pc_TC020792 | -1.4  | 0.04  | Down |  | 0.61  | 0.38      |      |  | 1.01  | 0.33 |      | -0.42 | 0.57 |      | Protein of unknown function (DUF1000)                             |          |
| Pc_TC020819 | 0.23  | 0.57  |      |  | 0.49  | 0.33      |      |  | -2.76 | 0.01 | Down | -1.59 | 0.01 | Down | heat shock transcription factor A2                                | HSF      |
| Pc_TC020841 | -1.29 | 0.09  |      |  | -2.2  | 0.02      | Down |  | -1.17 | 0.33 |      | -3.86 | 0    | Down | alpha/beta-Hydrolases superfamily protein                         |          |
| Pc_TC020850 | 0.45  | 0.14  |      |  | 0.63  | 0.11      |      |  | -3.02 | 0    | Down | -1.31 | 0.01 | Down | homology to ABI2                                                  |          |
| Pc_TC020854 | 0.3   | 0.95  |      |  | -2.53 | 0.4       |      |  | 2.9   | 0.05 | Up   | 1.04  | 0.5  |      | eukaryotic translation initiation factor 2 (eIF-2) family protein |          |
| Pc_TC020870 | -1.73 | 0     | Down |  | -0.22 | 0.74      |      |  | 0.35  | 0.73 |      | -0.13 | 0.85 |      | Protein of unknown function (DUF185)                              |          |

|             |       |       |      |       |           |      |  |       |           |      |  |       |       |      |                                                                           |      |
|-------------|-------|-------|------|-------|-----------|------|--|-------|-----------|------|--|-------|-------|------|---------------------------------------------------------------------------|------|
| Pc_TC020879 | -2.26 | ##### | Down | -0.32 | 0.6       |      |  | -0.48 | 0.62      |      |  | -0.32 | 0.62  |      | unknown protein                                                           |      |
| Pc_TC020883 | 0.77  | 0.25  |      | 1.7   | 0.02      | Up   |  | -2.06 | 0.11      |      |  | -1.4  | 0.12  |      | Leucine-rich repeat (LRR) family protein                                  |      |
| Pc_TC020897 | -0.17 | 0.63  |      | -0.49 | 0.28      |      |  | 2.06  | 0.02      | Up   |  | 0.99  | 0.05  |      | photosystem II light harvesting complex gene B1B2                         |      |
| Pc_TC020908 | -0.1  | 0.99  |      | -0.03 | 1         |      |  | 2.76  | 0.02      | Up   |  | 1.86  | 0.05  | Up   | ATP binding microtubule motor family protein                              |      |
| Pc_TC020911 | -0.24 | 0.84  |      | -2    | 0.12      |      |  | -1.05 | 0.47      |      |  | -3.02 | 0.02  | Down | Uncharacterized protein                                                   |      |
| Pc_TC020919 | -1.2  | 0.05  | Down | -1.48 | 0.04      | Down |  | -0.91 | 0.39      |      |  | -1.8  | 0.02  | Down | DNase I-like superfamily protein                                          |      |
| Pc_TC020922 | -0.26 | 0.66  |      | -0.23 | 0.74      |      |  | 1.75  | 0.07      |      |  | 1.38  | 0.03  | Up   | Protein of unknown function,DUF642                                        |      |
| Pc_TC020938 | 2.66  | 0.12  |      | 0.64  | 0.98      |      |  | 2.75  | 0.18      |      |  | 3.15  | 0.05  | Up   | ABC-2 type transporter family protein                                     |      |
| Pc_TC020939 | 2.4   | 0.01  | Up   | 2.7   | 0         | Up   |  | 1.47  | 0.29      |      |  | 1.04  | 0.36  |      | Protein kinase family protein with ARM repeat domain                      |      |
| Pc_TC020959 | -1.54 | 0.1   |      | -0.68 | 0.5       |      |  | 2.7   | 0.01      | Up   |  | 0.68  | 0.43  |      | Glycosyl hydrolase superfamily protein                                    |      |
| Pc_TC020970 | 0.98  | 0.02  |      | 1.48  | 0         | Up   |  | -0.45 | 0.64      |      |  | 1.3   | 0.03  | Up   | SLAC1 homologue 2                                                         |      |
| Pc_TC020971 | 1.32  | 0     | Up   | 1.54  | 0         | Up   |  | -1.78 | 0.06      |      |  | 1.12  | 0.04  | Up   | SLAC1 homologue 3                                                         |      |
| Pc_TC020972 | 0.07  | 0.86  |      | 0.61  | 0.21      |      |  | -1.98 | 0.04      | Down |  | -1.87 | 0     | Down | P-loop containing nucleoside triphosphate hydrolases superfamily protein  |      |
| Pc_TC020973 | -1.78 | 0.03  | Down | -0.41 | 0.65      |      |  | 0.15  | 0.91      |      |  | -1.15 | 0.2   |      | P-loop containing nucleoside triphosphate hydrolases superfamily protein  |      |
| Pc_TC020987 | -0.34 | 0.57  |      | 0.61  | 0.35      |      |  | -1.5  | 0.17      |      |  | -1.65 | 0.03  | Down | cytochrome P450,family 72,subfamily A,polypeptide 14                      |      |
| Pc_TC020988 | 0.39  | 0.71  |      | 1.42  | 0.13      |      |  | -2.89 | 0.09      |      |  | -3.77 | 0.01  | Down | cytochrome P450,family 72,subfamily A,polypeptide 13                      |      |
| Pc_TC020990 | 0.65  | 0.03  |      | 1.09  | 0.01      | Up   |  | -1    | 0.23      |      |  | -0.24 | 0.62  |      | cytochrome P450,family 72,subfamily A,polypeptide 14                      |      |
| Pc_TC020991 | 0.91  | 0     |      | 1.12  | 0.01      | Up   |  | -3.6  | 0         | Down |  | -0.48 | 0.34  |      | cytochrome P450,family 72,subfamily A,polypeptide 14                      |      |
| Pc_TC021006 | -2.65 | ##### | Down | -2.28 | 0         | Down |  | -1.97 | 0.07      |      |  | -1.33 | 0.06  |      | Glucose-1-phosphate adenylyltransferase family protein                    |      |
| Pc_TC021007 | -2.52 | 0     | Down | -0.29 | 0.69      |      |  | -0.19 | 0.86      |      |  | -1.54 | 0.04  | Down | Glucose-1-phosphate adenylyltransferase family protein                    |      |
| Pc_TC021015 | -0.05 | 1     |      | 2.33  | 0.02      | Up   |  | -1.27 | 0.49      |      |  | -2.37 | 0.16  |      | myb domain protein 24                                                     | MYB  |
| Pc_TC021017 | 0.35  | 0.43  |      | 1.35  | 0.01      | Up   |  | -3.1  | 0         | Down |  | -2.41 | 0     | Down | Putative uncharacterized protein Sb05g008466 (Fragment)                   |      |
| Pc_TC021018 | -0.6  | 0.34  |      | 0.45  | 0.52      |      |  | 3.83  | 0         | Up   |  | 2.37  | 0     | Up   | carbonic anhydrase 2                                                      |      |
| Pc_TC021020 | 0.03  | 0.94  |      | -0.42 | 0.36      |      |  | 2.93  | 0         | Up   |  | 1.69  | 0     | Up   | carbonic anhydrase 2                                                      |      |
| Pc_TC021021 | -0.14 | 0.69  |      | -0.37 | 0.41      |      |  | 2.9   | 0         | Up   |  | 1.71  | 0     | Up   | carbonic anhydrase 2                                                      |      |
| Pc_TC021045 | 0.14  | 0.65  |      | 0.21  | 0.59      |      |  | -1.7  | 0.05      | Down |  | -0.91 | 0.07  |      | K+ transporter 1                                                          |      |
| Pc_TC021059 | -0.82 | 0.23  |      | 0.2   | 0.79      |      |  | 1.73  | 0.1       |      |  | 1.46  | 0.04  | Up   | Tetratricopeptide repeat (TPR)-like superfamily protein                   |      |
| Pc_TC021074 | 0.34  | 0.36  |      | 0.18  | 0.71      |      |  | -2.41 | 0.01      | Down |  | -0.9  | 0.11  |      | protein phosphatase 2CA                                                   |      |
| Pc_TC021082 | 0.53  | 0.11  |      | 0.65  | 0.13      |      |  | -5.02 | 1.57E-006 | Down |  | -2.03 | 0     | Down | G-box binding factor 3                                                    | bZIP |
| Pc_TC021105 | 0.35  | 0.35  |      | 0.55  | 0.25      |      |  | -2.22 | 0.02      | Down |  | -0.93 | 0.1   |      | cAMP-regulated phosphoprotein 19-related protein                          |      |
| Pc_TC021115 | 1.89  | 0.02  | Up   | 1.48  | 0.14      |      |  | 0.86  | 0.54      |      |  | 0.75  | 0.49  |      | Ribosomal protein L18ae family                                            |      |
| Pc_TC021121 | 0.39  | 0.3   |      | 0.63  | 0.18      |      |  | -3.16 | 0         | Down |  | -1.4  | 0.02  | Down | Thioredoxin superfamily protein                                           |      |
| Pc_TC021122 | 1.19  | 0.17  |      | 0.85  | 0.42      |      |  | 3.69  | 0         | Up   |  | 2.27  | 0.01  | Up   | FASCICLIN-like arabinogalactan-protein 11                                 |      |
| Pc_TC021124 | 0.11  | 0.88  |      | -0.15 | 0.86      |      |  | -0.24 | 0.83      |      |  | 1.65  | 0.02  | Up   | lectin protein kinase family protein                                      |      |
| Pc_TC021136 | 1.54  | 0.02  | Up   | 1.81  | 0.02      | Up   |  | -0.17 | 0.9       |      |  | 0.72  | 0.39  |      | ATP synthase protein I -related                                           |      |
| Pc_TC021138 | -1.31 | 0.01  | Down | -0.61 | 0.33      |      |  | 0.7   | 0.47      |      |  | 0.54  | 0.39  |      | pentatricopeptide (PPR) repeat-containing protein                         |      |
| Pc_TC021141 | 0.37  | 0.58  |      | 1.53  | 0.03      | Up   |  | -3.03 | 0.02      | Down |  | -1.56 | 0.07  |      | NAC domain containing protein 2                                           | NAC  |
| Pc_TC021147 | 0.87  | 0.02  |      | 0.59  | 0.22      |      |  | 2.55  | 0         | Up   |  | 2.02  | 0     | Up   | chloroplast 30S ribosomal protein S20,putative                            |      |
| Pc_TC021148 | -2.19 | ##### | Down | -2.84 | 4.98E-007 | Down |  | -0.05 | 0.95      |      |  | -3.09 | ##### | Down | chloroplast 30S ribosomal protein S20,putative                            |      |
| Pc_TC021165 | 0.31  | 0.33  |      | 0.41  | 0.28      |      |  | 0.57  | 0.49      |      |  | 1.02  | 0.04  | Up   | NADH-dependent glutamate synthase 1                                       |      |
| Pc_TC021178 | -0.21 | 0.78  |      | 0     | 1         |      |  | -3.08 | 0.02      | Down |  | -2.75 | 0     | Down | RING/FYVE/PHD zinc finger superfamily protein                             |      |
| Pc_TC021186 | 1.4   | 0     | Up   | 2.21  | 8.50E-005 | Up   |  | 0.15  | 0.89      |      |  | 0.67  | 0.3   |      | Protein kinase superfamily protein                                        |      |
| Pc_TC021193 | 3.25  | 0     | Up   | 3.48  | 0         | Up   |  | 3.9   | 0         | Up   |  | 4.48  | ##### | Up   | Nucleotidyl transferase superfamily protein                               |      |
| Pc_TC021208 | -1.14 | 0.26  |      | -0.66 | 0.56      |      |  | -2.5  | 0.1       |      |  | -4.18 | 0     | Down | S-adenosyl-L-methionine-dependent methyltransferases superfamily protein  |      |
| Pc_TC021209 | 0.39  | 0.22  |      | 0.64  | 0.11      |      |  | -1.86 | 0.03      | Down |  | -1.07 | 0.04  | Down | Core-2/-branching beta-1,6-N-acetylglucosaminyltransferase family protein |      |
| Pc_TC021217 | 0.51  | 0.1   |      | 1.39  | 0         | Up   |  | -2.92 | 0         | Down |  | -0.25 | 0.61  |      | ATP binding cassette subfamily B4                                         |      |
| Pc_TC021224 | 0.82  | 0.05  |      | 1.45  | 0         | Up   |  | -3.51 | 0         | Down |  | -1.71 | 0.01  | Down | mitogen-activated protein kinase kinase kinase 16                         |      |
| Pc_TC021225 | 0.77  | 0.03  |      | 1.08  | 0.01      | Up   |  | -4.01 | 7.86E-005 | Down |  | -1.02 | 0.07  |      | mitogen-activated protein kinase kinase kinase 17                         |      |
| Pc_TC021227 | -0.38 | 0.32  |      | -1.97 | 0         | Down |  | 0.29  | 0.74      |      |  | 0.1   | 0.85  |      | Nodulin MtN3 family protein                                               |      |
| Pc_TC021247 | 0.1   | 0.9   |      | 0.58  | 0.43      |      |  | -2.8  | 0.03      | Down |  | -0.62 | 0.44  |      | ABA-inducible BHLH-type transcription factor                              | bHLH |
| Pc_TC021250 | 1.04  | 0.02  | Up   | 0.89  | 0.12      |      |  | -2.01 | 0.06      |      |  | -0.35 | 0.6   |      | Os01g0711200 protein                                                      |      |
| Pc_TC021262 | 1.23  | 0.2   |      | 1.42  | 0.18      |      |  | 2.27  | 0.08      |      |  | 1.95  | 0.04  | Up   | IQ-domain 8                                                               |      |
| Pc_TC021274 | -0.71 | 0.02  |      | -1.72 | 8.89E-006 | Down |  | 1.85  | 0.04      | Up   |  | 0.82  | 0.09  |      | glycine decarboxylase P-protein 2                                         |      |
| Pc_TC021286 | 2.08  | 0.1   |      | 1.06  | 0.56      |      |  | -0.01 | 1         |      |  | 2.59  | 0.03  | Up   | WRKY DNA-binding protein 51                                               | WRKY |
| Pc_TC021298 | 0.17  | 0.75  |      | -0.08 | 0.91      |      |  | 1.95  | 0.04      | Up   |  | 1.23  | 0.05  | Up   | IQ-domain 31                                                              |      |
| Pc_TC021300 | 0.38  | 0.19  |      | 0.49  | 0.19      |      |  | -2.73 | 0         | Down |  | -1.73 | 0     | Down | Protein kinase superfamily protein                                        |      |
| Pc_TC021304 | 0.48  | 0.26  |      | 0.75  | 0.16      |      |  | -1.86 | 0.06      |      |  | -2.13 | 0     | Down | Protein of unknown function (DUF581)                                      |      |
| Pc_TC021305 | 0.23  | 0.43  |      | 0.38  | 0.3       |      |  | -2.54 | 0         | Down |  | -1.67 | 0     | Down | CHY-type/CTCOHY-type/RING-type Zinc finger protein                        |      |
| Pc_TC021306 | 0.36  | 0.36  |      | 1.06  | 0.02      | Up   |  | -3.04 | 0         | Down |  | -1.6  | 0.01  | Down | CHY-type/CTCOHY-type/RING-type Zinc finger protein                        |      |
| Pc_TC021308 | 0.28  | 0.59  |      | 1.82  | 0         | Up   |  | -2.91 | 0.01      | Down |  | -3.06 | ##### | Down | CHY-type/CTCOHY-type/RING-type Zinc finger protein                        |      |
| Pc_TC021309 | 0.37  | 0.22  |      | 0.75  | 0.05      |      |  | -2.69 | 0         | Down |  | -1.59 | 0     | Down | CHY-type/CTCOHY-type/RING-type Zinc finger protein                        |      |
| Pc_TC021310 | 1.34  | 0     | Up   | 1.67  | 0         | Up   |  | 0.38  | 0.7       |      |  | 1.26  | 0.04  | Up   | sulfate transporter 3;5                                                   |      |

|             |       |       |      |       |           |      |       |      |      |       |      |      |                                                                          |      |
|-------------|-------|-------|------|-------|-----------|------|-------|------|------|-------|------|------|--------------------------------------------------------------------------|------|
| Pc_TC021315 | -0.42 | 0.48  |      | 0.54  | 0.42      |      | -0.02 | 0.99 |      | -2.17 | 0.01 | Down | Pyridoxal phosphate phosphatase-related protein                          |      |
| Pc_TC021316 | 0.36  | 0.43  |      | 0.56  | 0.31      |      | 2.23  | 0.02 | Up   | 0.97  | 0.1  |      | starch synthase 4                                                        |      |
| Pc_TC021317 | 0.06  | 0.95  |      | -0.5  | 0.55      |      | 1.9   | 0.07 |      | 1.45  | 0.04 | Up   | starch synthase 4                                                        |      |
| Pc_TC021319 | -0.01 | 0.99  |      | -0.83 | 0.2       |      | 2.45  | 0.01 | Up   | 0.41  | 0.52 |      | starch synthase 4                                                        |      |
| Pc_TC021320 | 0.41  | 0.54  |      | -0.02 | 1         |      | 1.04  | 0.33 |      | 1.43  | 0.05 | Up   | Os01g0721800 protein                                                     |      |
| Pc_TC021336 | 1.06  | 0     | Up   | 1.05  | 0.01      | Up   | -2.15 | 0.01 | Down | 1.41  | 0    | Up   | phosphoribosyl pyrophosphate (PRPP) synthase 3                           |      |
| Pc_TC021344 | 0.1   | 0.85  |      | -0.48 | 0.44      |      | 0.87  | 0.37 |      | 1.2   | 0.05 | Up   | subtilase family protein                                                 |      |
| Pc_TC021360 | 2.35  | 0.03  | Up   | 3.31  | 0         | Up   | 1.96  | 0.21 |      | 1.5   | 0.27 |      | P-loop containing nucleoside triphosphate hydrolases superfamily protein |      |
| Pc_TC021378 | 0.3   | 0.3   |      | 0.35  | 0.35      |      | -1.44 | 0.09 |      | -1.02 | 0.04 | Down | phosphofructokinase 7                                                    |      |
| Pc_TC021382 | 0.42  | 0.19  |      | 0.59  | 0.15      |      | -1.82 | 0.04 | Down | -1.1  | 0.03 | Down | haloacid dehalogenase-like hydrolase family protein                      |      |
| Pc_TC021400 | 0.13  | 0.69  |      | 0.02  | 0.96      |      | -1.72 | 0.05 |      | -1.32 | 0.01 | Down | NADP-malic enzyme 1                                                      |      |
| Pc_TC021401 | -0.04 | 0.94  |      | -0.1  | 0.87      |      | -1.62 | 0.12 |      | -1.48 | 0.03 | Down | ATP-dependent protease La (LON) domain protein                           |      |
| Pc_TC021402 | 2.05  | 0.02  | Up   | 2.55  | 0.01      | Up   | 1.39  | 0.32 |      | -0.91 | 0.54 |      | ATP-dependent protease La (LON) domain protein                           |      |
| Pc_TC021426 | -0.35 | 0.31  |      | -0.78 | 0.08      |      | 1.86  | 0.03 | Up   | 0.93  | 0.06 |      | Ribosomal protein L13 family protein                                     |      |
| Pc_TC021432 | 0.93  | 0.44  |      | 0.06  | 1         |      | 3.53  | 0.01 | Up   | 2.33  | 0.02 | Up   | RAB GTPase homolog A1B                                                   |      |
| Pc_TC021433 | 0.23  | 0.61  |      | 0.04  | 0.95      |      | 0.99  | 0.29 |      | 1.3   | 0.03 | Up   | WRKY DNA-binding protein 65                                              | WRKY |
| Pc_TC021434 | -0.51 | 0.15  |      | -0.41 | 0.36      |      | 2.05  | 0.02 | Up   | 0.91  | 0.08 |      | cellulose synthase family protein                                        |      |
| Pc_TC021460 | -0.85 | 0.26  |      | -0.46 | 0.6       |      | -2.57 | 0.05 | Down | -0.35 | 0.68 |      | Uncharacterized protein                                                  |      |
| Pc_TC021463 | -0.57 | 0.17  |      | -0.41 | 0.43      |      | 1.98  | 0.02 | Up   | 1.25  | 0.02 | Up   | Protein of unknown function,DUF642                                       |      |
| Pc_TC021465 | -3.73 | 0.01  | Down | -2.75 | 0.04      | Down | -0.4  | 0.78 |      | 1.71  | 0.04 | Up   | P-loop containing nucleoside triphosphate hydrolases superfamily protein |      |
| Pc_TC021475 | 0.36  | 0.25  |      | 0.47  | 0.25      |      | -1.77 | 0.04 | Down | -0.76 | 0.14 |      | CDP-diacylglycerol synthase 1                                            |      |
| Pc_TC021483 | 2.26  | 0.01  | Up   | 1.51  | 0.18      |      | 2.96  | 0.02 | Up   | 2.14  | 0.03 | Up   | Xanthine/uracil permease family protein                                  |      |
| Pc_TC021512 | -0.88 | 0.05  |      | -1.48 | 0.01      | Down | 1.16  | 0.19 |      | -0.11 | 0.85 |      | Acetamidase/Formamidase family protein                                   |      |
| Pc_TC021563 | 0.6   | 0.57  |      | -0.04 | 1         |      | 2.12  | 0.09 |      | 2.43  | 0.01 | Up   | purple acid phosphatase 10                                               |      |
| Pc_TC021588 | -0.17 | 0.81  |      | 0.06  | 0.95      |      | -1.67 | 0.16 |      | -2.37 | 0.01 | Down | LRR and NB-ARC domains-containing disease resistance protein             |      |
| Pc_TC021593 | -1.5  | 0.01  | Down | -0.62 | 0.36      |      | 0.03  | 0.98 |      | -0.18 | 0.8  |      | Pentatricopeptide repeat (PPR-like) superfamily protein                  |      |
| Pc_TC021607 | 1.1   | 0.01  | Up   | 1.31  | 0.01      | Up   | -0.1  | 0.92 |      | 0.27  | 0.66 |      | homolog of yeast autophagy 18 (ATG18) F                                  |      |
| Pc_TC021617 | -0.25 | 0.46  |      | 1     | 0.02      | Up   | -0.71 | 0.41 |      | -0.43 | 0.41 |      | Uncharacterized protein                                                  |      |
| Pc_TC021621 | -3.11 | ##### | Down | -0.25 | 0.72      |      | 1.03  | 0.31 |      | 0.9   | 0.17 |      | pentatricopeptide repeat 336                                             |      |
| Pc_TC021622 | -0.47 | 0.46  |      | -2.33 | 0.01      | Down | 0.8   | 0.45 |      | 0.44  | 0.54 |      | pentatricopeptide repeat 336                                             |      |
| Pc_TC021630 | -0.39 | 0.2   |      | -1.23 | 0         | Down | 0.3   | 0.72 |      | 0.01  | 0.98 |      | Subtilase family protein                                                 |      |
| Pc_TC021632 | 0.5   | 0.2   |      | 0.38  | 0.45      |      | 0.24  | 0.79 |      | 1.15  | 0.04 | Up   | Subtilase family protein                                                 |      |
| Pc_TC021634 | -1.06 | 0.1   |      | -1.4  | 0.07      |      | -1.07 | 0.33 |      | -2.46 | 0    | Down | RING 1A                                                                  |      |
| Pc_TC021645 | -0.87 | 0.14  |      | -1.53 | 0.03      | Down | 2.53  | 0.01 | Up   | 1.38  | 0.03 | Up   | Phosphoglycerate kinase family protein                                   |      |
| Pc_TC021657 | -0.1  | 0.78  |      | -1.25 | 0.01      | Down | 1.24  | 0.15 |      | 0.9   | 0.08 |      | 4-(cytidine 5'-phospho)-2-C-methyl-D-erythritol kinase                   |      |
| Pc_TC021704 | 1.4   | 0     | Up   | 1.34  | 0         | Up   | -0.02 | 0.99 |      | 0.3   | 0.59 |      | ADP-ribosylation factor A1B                                              |      |
| Pc_TC021705 | 0.86  | 0.02  |      | 1.22  | 0.01      | Up   | -0.37 | 0.68 |      | 0.67  | 0.2  |      | ADP-ribosylation factor A1B                                              |      |
| Pc_TC021709 | -0.92 | 0.65  |      | -0.13 | 1         |      | 2.98  | 0.03 | Up   | 1.48  | 0.23 |      | Uncharacterized protein                                                  |      |
| Pc_TC021728 | -0.37 | 0.37  |      | -0.6  | 0.26      |      | 1.03  | 0.25 |      | 1.1   | 0.05 | Up   | Auxin efflux carrier family protein                                      |      |
| Pc_TC021731 | -0.02 | 0.98  |      | 0.45  | 0.44      |      | 2.03  | 0.03 | Up   | 0.8   | 0.2  |      | Leucine-rich repeat protein kinase family protein                        |      |
| Pc_TC021742 | -0.9  | 0.16  |      | -0.39 | 0.59      |      | 2.41  | 0.02 | Up   | 1.59  | 0.02 | Up   | Leucine-rich receptor-like protein kinase family protein                 |      |
| Pc_TC021747 | 0.1   | 0.82  |      | -0.05 | 0.92      |      | 1.48  | 0.1  |      | 1.67  | 0    | Up   | expansin A1                                                              |      |
| Pc_TC021754 | 1.79  | 0.04  | Up   | 1.91  | 0.05      |      | -1.6  | 0.35 |      | -0.03 | 1    |      | CBL-interacting protein kinase 2                                         |      |
| Pc_TC021762 | 1.09  | 0.05  | Up   | 1.23  | 0.06      |      | -0.32 | 0.77 |      | 0.26  | 0.72 |      | Transmembrane amino acid transporter family protein                      |      |
| Pc_TC021763 | 0.65  | 0.23  |      | 1.27  | 0.04      | Up   | -0.19 | 0.86 |      | 1     | 0.13 |      | WRKY DNA-binding protein 33                                              | WRKY |
| Pc_TC021775 | -0.34 | 1     |      | 1.38  | 0.45      |      | 3.67  | 0.01 | Up   | 2.43  | 0.07 |      | Predicted protein                                                        |      |
| Pc_TC021786 | 1.33  | 0.03  | Up   | 1.74  | 0.01      | Up   | 0.97  | 0.37 |      | 0.2   | 0.81 |      | BCL-2-associated athanogene 4                                            |      |
| Pc_TC021791 | 0.84  | 0.44  |      | 4.01  | 1.97E-006 | Up   | 1.83  | 0.17 |      | 2.71  | 0    | Up   | Selenoprotein,Rdx type                                                   |      |
| Pc_TC021793 | 1.32  | 0.01  | Up   | 1.01  | 0.09      |      | -1.66 | 0.12 |      | 0.12  | 0.86 |      | 2-oxoglutarate (2OG) and Fe(II)-dependent oxygenase superfamily protein  |      |
| Pc_TC021795 | 0.3   | 0.95  |      | 2.8   | 0.02      | Up   | 0.73  | 0.73 |      | 1.04  | 0.5  |      | 2-oxoglutarate (2OG) and Fe(II)-dependent oxygenase superfamily protein  |      |
| Pc_TC021800 | 0.64  | 0.08  |      | 0.92  | 0.04      |      | -2.14 | 0.02 | Down | -0.58 | 0.3  |      | unknown protein                                                          |      |
| Pc_TC021827 | 0.62  | 0.24  |      | 1.48  | 0.01      | Up   | -0.32 | 0.76 |      | -0.04 | 0.96 |      | Lung seven transmembrane receptor family protein                         |      |
| Pc_TC021836 | 1.6   | 0.02  | Up   | 0.98  | 0.25      |      | 1.14  | 0.33 |      | 1.45  | 0.07 |      | Cation efflux family protein                                             |      |
| Pc_TC021841 | 1.66  | 0.23  |      | 1.44  | 0.37      |      | 0.77  | 0.74 |      | 2.59  | 0.03 | Up   | Expressed protein                                                        |      |
| Pc_TC021853 | 1.45  | 0.06  |      | 1.23  | 0.17      |      | 0.88  | 0.48 |      | 1.89  | 0.02 | Up   | ENTH/VHS family protein                                                  |      |
| Pc_TC021859 | 1.4   | 0.4   |      | 3.58  | 0         | Up   | 0.96  | 0.69 |      | 1.08  | 0.57 |      | triosephosphate isomerase                                                |      |
| Pc_TC021863 | 0.2   | 0.87  |      | 1.33  | 0.16      |      | -0.31 | 0.85 |      | 2.51  | 0    | Up   | Ribonuclease II/R family protein                                         |      |
| Pc_TC021865 | 0.23  | 0.87  |      | 0.28  | 0.84      |      | 2.98  | 0.01 | Up   | 2.1   | 0.02 | Up   | laccase 17                                                               |      |
| Pc_TC021883 | 2.49  | 0     | Up   | 2.2   | 0.01      | Up   | -0.19 | 0.92 |      | 1.29  | 0.15 |      | NAD(P)-linked oxidoreductase superfamily protein                         |      |
| Pc_TC021884 | 0.44  | 0.61  |      | 1.36  | 0.11      |      | -2.69 | 0.07 |      | -2.79 | 0.02 | Down | NAD(P)-linked oxidoreductase superfamily protein                         |      |
| Pc_TC021886 | 0.6   | 0.11  |      | 0.6   | 0.15      |      | -2.76 | 0.01 | Down | -0.59 | 0.3  |      | delta1-pyrroline-5-carboxylate synthase 1                                |      |
| Pc_TC021887 | 0.91  | 0     |      | 0.64  | 0.12      |      | -2.71 | 0    | Down | -0.76 | 0.14 |      | Tetratricopeptide repeat (TPR)-like superfamily protein                  |      |

|             |       |      |      |       |           |      |       |      |      |       |       |      |                                                                                           |      |
|-------------|-------|------|------|-------|-----------|------|-------|------|------|-------|-------|------|-------------------------------------------------------------------------------------------|------|
| Pc_TC021891 | 1.4   | 0.04 | Up   | 0.02  | 1         |      | 0.07  | 0.98 |      | 0.8   | 0.34  |      | unknown protein                                                                           |      |
| Pc_TC021892 | -0.52 | 0.2  |      | 0.1   | 0.84      |      | -3.1  | 0    | Down | -2.64 | ##### | Down | Bifunctional inhibitor/lipid-transfer protein/seed storage 2S albumin superfamily protein |      |
| Pc_TC021898 | -0.02 | 0.98 |      | 1.75  | 0         | Up   | 1.34  | 0.17 |      | 0.94  | 0.13  |      | laccase 7                                                                                 |      |
| Pc_TC021900 | 0.88  | 0.08 |      | 1.48  | 0.01      | Up   | 0.49  | 0.63 |      | 0.93  | 0.15  |      | SOUL heme-binding family protein                                                          |      |
| Pc_TC021905 | -0.55 | 0.33 |      | -0.11 | 0.87      |      | -0.61 | 0.55 |      | -1.71 | 0.02  | Down | alpha-glucan phosphorylase 2                                                              |      |
| Pc_TC021909 | -2    | 0    | Down | -2.02 | 0.01      | Down | 0.52  | 0.62 |      | -0.11 | 0.88  |      | phosphate transporter 4;3                                                                 |      |
| Pc_TC021920 | -0.21 | 0.8  |      | 0.58  | 0.47      |      | 1.69  | 0.12 |      | 1.62  | 0.03  | Up   | Transmembrane amino acid transporter family protein                                       |      |
| Pc_TC021938 | 0.75  | 0.28 |      | 1.74  | 0.02      | Up   | 0.03  | 1    |      | 0.19  | 0.84  |      | alpha/beta-Hydrolases superfamily protein                                                 |      |
| Pc_TC021939 | -1.2  | 0.05 | Down | -2.22 | 0         | Down | -2.7  | 0.02 | Down | -2.14 | 0.01  | Down | alpha/beta-Hydrolases superfamily protein                                                 |      |
| Pc_TC021940 | 2.11  | 0    | Up   | 2.03  | 0.01      | Up   | -5.25 | 0.01 | Down | -3.13 | 0.02  | Down | Basic-leucine zipper (bZIP) transcription factor family protein                           | bZIP |
| Pc_TC021942 | -2.62 | 0.01 | Down | -0.58 | 0.56      |      | -5.78 | 0    | Down | -1.85 | 0.07  |      | Basic-leucine zipper (bZIP) transcription factor family protein                           | bZIP |
| Pc_TC021952 | 0.41  | 0.21 |      | 0.96  | 0.02      |      | -1.81 | 0.04 | Down | -0.49 | 0.35  |      | Glycosyl hydrolase superfamily protein                                                    |      |
| Pc_TC021965 | 1.22  | 0.44 |      | 2.78  | 0.02      | Up   | -0.23 | 1    |      | 0.11  | 1     |      | ovate family protein 13                                                                   | OFP  |
| Pc_TC021977 | 0.68  | 0.22 |      | 1.94  | 0         | Up   | -0.12 | 0.92 |      | 0.04  | 0.97  |      | Histone superfamily protein                                                               |      |
| Pc_TC021980 | -0.41 | 0.46 |      | -1.18 | 0.08      |      | 2.42  | 0.01 | Up   | 0.86  | 0.18  |      | Inositol monophosphatase family protein                                                   |      |
| Pc_TC021981 | -0.69 | 0.03 |      | -1.35 | 0         | Down | 1.79  | 0.03 | Up   | 0.82  | 0.1   |      | Inositol monophosphatase family protein                                                   |      |
| Pc_TC021983 | -2.25 | 0    | Down | -2.18 | 0         | Down | 2.1   | 0.03 | Up   | 1.38  | 0.03  | Up   | Inositol monophosphatase family protein                                                   |      |
| Pc_TC021985 | 1.34  | 0.21 |      | -0.26 | 0.94      |      | 3.8   | 0    | Up   | 0.83  | 0.52  |      | pyrophosphorylase 1                                                                       |      |
| Pc_TC021996 | -0.13 | 0.98 |      | 0.74  | 0.53      |      | 3.17  | 0.01 | Up   | 2.68  | 0     | Up   | Subtilase family protein                                                                  |      |
| Pc_TC022009 | 0.86  | 0.14 |      | 1.68  | 0.01      | Up   | 0.38  | 0.73 |      | 1.59  | 0.02  | Up   | Major facilitator superfamily protein                                                     |      |
| Pc_TC022010 | 1.14  | 0.03 | Up   | 0.72  | 0.26      |      | -0.52 | 0.62 |      | -1.67 | 0.03  | Down | Major facilitator superfamily protein                                                     |      |
| Pc_TC022026 | -1.55 | 0.12 |      | -3.03 | 0.02      | Down | 1.3   | 0.27 |      | 0.95  | 0.27  |      | 5'-3' exonuclease family protein                                                          |      |
| Pc_TC022051 | 1.49  | 0.17 |      | 0.89  | 0.53      |      | 3.57  | 0.01 | Up   | -0.22 | 0.96  |      | Plant stearoyl-acyl-carrier-protein desaturase family protein                             |      |
| Pc_TC022052 | -0.56 | 0.7  |      | -0.94 | 0.54      |      | 2.72  | 0.03 | Up   | 2.19  | 0.02  | Up   | Symbols: CHR11                                                                            | SNF2 |
| Pc_TC022053 | -0.78 | 0.24 |      | -0.53 | 0.48      |      | 2.54  | 0.01 | Up   | 1.48  | 0.03  | Up   | Nodulin MtN3 family protein                                                               |      |
| Pc_TC022064 | 0.64  | 0.04 |      | 1.23  | 0         | Up   | -1.74 | 0.04 | Down | -0.11 | 0.83  |      | NAC (No Apical Meristem) domain transcriptional regulator superfamily protein             | NAC  |
| Pc_TC022095 | -0.38 | 0.63 |      | -0.27 | 0.77      |      | 2.17  | 0.04 | Up   | 0.87  | 0.26  |      | RING/FYVE/PHD zinc finger superfamily protein                                             |      |
| Pc_TC022120 | 0.23  | 0.95 |      | 2.64  | 0.01      | Up   | -0.67 | 0.76 |      | -0.37 | 0.87  |      | Pentatricopeptide repeat (PPR) superfamily protein                                        |      |
| Pc_TC022128 | 0.18  | 0.57 |      | 0.16  | 0.69      |      | -1.56 | 0.07 |      | -1.08 | 0.03  | Down | plant U-box 45                                                                            |      |
| Pc_TC022134 | -0.65 | 0.08 |      | -1.16 | 0.02      | Down | 1.53  | 0.07 |      | 0.94  | 0.07  |      | Nucleic acid-binding,OB-fold-like protein                                                 |      |
| Pc_TC022138 | 0.29  | 0.63 |      | -1.86 | 0.02      | Down | 0.59  | 0.58 |      | 0.38  | 0.6   |      | Protein kinase superfamily protein                                                        |      |
| Pc_TC022139 | -3.88 | 0    | Down | -1.09 | 0.32      |      | -1.54 | 0.27 |      | -5.33 | 0     | Down | Protein kinase superfamily protein                                                        |      |
| Pc_TC022145 | 0.46  | 0.15 |      | 0.58  | 0.16      |      | -1.79 | 0.04 | Down | -1.62 | 0     | Down | Nucleotide-diphospho-sugar transferases superfamily protein                               |      |
| Pc_TC022149 | -2.13 | 0.03 | Down | -1.98 | 0.08      |      | -1.8  | 0.19 |      | -0.83 | 0.4   |      | Ypt/Rab-GAP domain of gyp1p superfamily protein                                           |      |
| Pc_TC022150 | 1.45  | 0.08 |      | 0.85  | 0.42      |      | 2.7   | 0.02 | Up   | 1.68  | 0.07  |      | Ypt/Rab-GAP domain of gyp1p superfamily protein                                           |      |
| Pc_TC022154 | 1.66  | 0.72 |      | 1.64  | 0.75      |      | 4.83  | 0.02 | Up   | 2.8   | 0.26  |      | proline transporter 1                                                                     |      |
| Pc_TC022157 | -0.72 | 0.06 |      | -1    | 0.04      | Down | 0.77  | 0.38 |      | 0.04  | 0.94  |      | dicer-like 3                                                                              |      |
| Pc_TC022164 | 0.54  | 0.45 |      | 2.04  | 0         | Up   | -6.22 | 0    | Down | -6.1  | ##### | Down | Os01g0910900 protein                                                                      |      |
| Pc_TC022165 | 0.49  | 0.28 |      | 1.45  | 0.01      | Up   | 0.9   | 0.34 |      | 0.36  | 0.55  |      | Uncharacterized protein                                                                   |      |
| Pc_TC022167 | 0.51  | 0.2  |      | -0.12 | 0.82      |      | -3.06 | 0    | Down | -0.62 | 0.29  |      | P-loop containing nucleoside triphosphate hydrolases superfamily protein                  |      |
| Pc_TC022168 | 1.11  | 0.06 |      | 2.96  | 1.57E-006 | Up   | 0.12  | 0.92 |      | 0.85  | 0.24  |      | P-loop containing nucleoside triphosphate hydrolases superfamily protein                  |      |
| Pc_TC022170 | 0.06  | 0.83 |      | 0.86  | 0.02      |      | -2.37 | 0.01 | Down | -0.78 | 0.11  |      | P-loop containing nucleoside triphosphate hydrolases superfamily protein                  |      |
| Pc_TC022189 | -0.52 | 0.46 |      | -0.05 | 0.97      |      | 2.17  | 0.04 | Up   | 1.1   | 0.13  |      | Expressed protein                                                                         |      |
| Pc_TC022191 | 0.49  | 0.71 |      | -0.72 | 0.68      |      | 3.2   | 0.01 | Up   | 2.17  | 0.03  | Up   | stomagen                                                                                  |      |
| Pc_TC022224 | -0.76 | 0.38 |      | -1.39 | 0.18      |      | 0.3   | 0.82 |      | -3.73 | 0     | Down | S-adenosyl-L-methionine-dependent methyltransferases superfamily protein                  |      |
| Pc_TC022242 | 0.34  | 0.62 |      | 0.38  | 0.63      |      | -2.84 | 0.03 | Down | -0.48 | 0.56  |      | unknown protein                                                                           |      |
| Pc_TC022273 | -0.51 | 0.59 |      | -3.99 | 0.01      | Down | 1.34  | 0.25 |      | 0.56  | 0.54  |      | long chain base2                                                                          |      |
| Pc_TC022280 | -0.57 | 0.74 |      | 0.77  | 0.57      |      | 2.88  | 0.03 | Up   | 2.45  | 0.01  | Up   | thylakoid luminal P17.1 protein                                                           |      |
| Pc_TC022283 | -0.45 | 0.18 |      | -1.04 | 0.02      | Down | 0.87  | 0.3  |      | 0.12  | 0.81  |      | beta glucosidase 11                                                                       |      |
| Pc_TC022284 | 0.19  | 0.71 |      | -0.59 | 0.35      |      | 1.61  | 0.09 |      | 1.21  | 0.05  | Up   | beta glucosidase 11                                                                       |      |
| Pc_TC022300 | 0.38  | 0.29 |      | 0.97  | 0.03      |      | -2.02 | 0.03 | Down | -1.53 | 0.01  | Down | Photosystem II reaction center PsbP family protein                                        |      |
| Pc_TC022308 | 1.26  | 0.05 | Up   | 0.08  | 0.94      |      | 1.18  | 0.28 |      | -0.58 | 0.5   |      | cullin 1                                                                                  |      |
| Pc_TC022321 | -0.17 | 0.71 |      | -0.29 | 0.62      |      | 1.89  | 0.04 | Up   | 1.18  | 0.04  | Up   | hydroxyproline-rich glycoprotein family protein                                           |      |
| Pc_TC022328 | 0.32  | 0.33 |      | 1.29  | 0         | Up   | -2.77 | 0    | Down | -0.53 | 0.31  |      | cytokinin oxidase/dehydrogenase 1                                                         |      |
| Pc_TC022331 | 0.78  | 0.08 |      | -0.9  | 0.14      |      | 1.21  | 0.19 |      | 1.93  | 0     | Up   | beta-1,3-glucanase 1                                                                      |      |
| Pc_TC022348 | 0.13  | 0.88 |      | -0.58 | 0.52      |      | 0.04  | 0.99 |      | 1.65  | 0.03  | Up   | Glycosyl hydrolase superfamily protein                                                    |      |
| Pc_TC022362 | 0.79  | 0.03 |      | 1.24  | 0.01      | Up   | -2.48 | 0.01 | Down | -1.04 | 0.06  |      | Uncharacterized protein                                                                   |      |
| Pc_TC022364 | 2.54  | 0.15 |      | 3.31  | 0.04      | Up   | 3.09  | 0.11 |      | 2.63  | 0.14  |      | Ankyrin repeat family protein / BTB/POZ domain-containing protein                         |      |
| Pc_TC022378 | 0.08  | 1    |      | 3.38  | 0.04      | Up   | 2.83  | 0.16 |      | 3.48  | 0.02  | Up   | germin-like protein 5                                                                     |      |
| Pc_TC022391 | 0.49  | 0.83 |      | 2.72  | 0.02      | Up   | 2.78  | 0.06 |      | 1.5   | 0.27  |      | Eukaryotic aspartyl protease family protein                                               |      |
| Pc_TC022393 | 1.28  | 0.05 | Up   | 2.25  | 0         | Up   | -2.79 | 0.04 | Down | -1.74 | 0.06  |      | Calcium-binding EF-hand family protein                                                    |      |
| Pc_TC022409 | 2.06  | 0.01 | Up   | -0.09 | 0.99      |      | 2.09  | 0.08 |      | 1.83  | 0.04  | Up   | RNA-binding CRS1 / YhbY (CRM) domain protein                                              |      |

|             |       |       |      |       |           |      |       |           |      |       |       |      |                                                                                  |          |
|-------------|-------|-------|------|-------|-----------|------|-------|-----------|------|-------|-------|------|----------------------------------------------------------------------------------|----------|
| Pc_TC022412 | -1.39 | 0.02  | Down | -1.37 | 0.05      | Down | 1.29  | 0.19      |      | -0.04 | 0.96  |      | MUTL-homologue 1                                                                 |          |
| Pc_TC022422 | 1.14  | 0.01  | Up   | 0.45  | 0.44      |      | 1.2   | 0.21      |      | 2.56  | ##### | Up   | Peroxidase superfamily protein                                                   |          |
| Pc_TC022473 | 0.43  | 0.57  |      | 1.69  | 0.03      | Up   | -1.01 | 0.42      |      | -2.02 | 0.04  | Down | tonoplast intrinsic protein 1;3                                                  |          |
| Pc_TC022484 | -0.08 | 0.91  |      | -1.14 | 0.16      |      | -2.66 | 0.03      | Down | -0.47 | 0.55  |      | homolog of mammalian P58IPK                                                      | TPR      |
| Pc_TC022505 | -0.48 | 0.29  |      | -0.82 | 0.15      |      | 2     | 0.03      | Up   | 0.95  | 0.1   |      | ferredoxin-NADP(+)-oxidoreductase 1                                              |          |
| Pc_TC022506 | -0.18 | 0.63  |      | -0.97 | 0.04      |      | 1.82  | 0.03      | Up   | 0.93  | 0.07  |      | ferredoxin-NADP(+)-oxidoreductase 1                                              |          |
| Pc_TC022507 | 0.17  | 0.62  |      | -0.19 | 0.68      |      | 1.38  | 0.1       |      | 1.15  | 0.03  | Up   | P-loop containing nucleoside triphosphate hydrolases superfamily protein         |          |
| Pc_TC022513 | 0.06  | 0.88  |      | -0.5  | 0.3       |      | -4.08 | 7.11E-005 | Down | -2.27 | 0     | Down | Glycosyl hydrolases family 32 protein                                            |          |
| Pc_TC022556 | -0.19 | 0.71  |      | -0.78 | 0.23      |      | 2.1   | 0.03      | Up   | 1.42  | 0.02  | Up   | FKBP-like peptidyl-prolyl cis-trans isomerase family protein                     |          |
| Pc_TC022557 | 0.38  | 0.79  |      | -0.32 | 0.88      |      | -0.29 | 0.9       |      | -4.08 | 0.04  | Down | UDP-GLUCOSE PYROPHOSPHORYLASE 1                                                  |          |
| Pc_TC022581 | 0.34  | 0.27  |      | 1.05  | 0.01      | Up   | -0.67 | 0.42      |      | -0.19 | 0.7   |      | Cyclophilin-like peptidyl-prolyl cis-trans isomerase family protein              |          |
| Pc_TC022598 | 1.63  | 0.02  | Up   | 0.42  | 0.67      |      | -0.04 | 1         |      | -0.62 | 0.55  |      | NAD(P)-linked oxidoreductase superfamily protein                                 |          |
| Pc_TC022603 | -1.2  | 0.07  |      | -1.82 | 0.03      | Down | 0.32  | 0.77      |      | -0.64 | 0.4   |      | AT-hook motif nuclear-localized protein 1                                        |          |
| Pc_TC022625 | 1.52  | 0.03  | Up   | 0.91  | 0.29      |      | 0.87  | 0.47      |      | 0.56  | 0.53  |      | basic region/leucine zipper transcription factor 68                              | bZIP     |
| Pc_TC022628 | 3.54  | 0.08  |      | 3.06  | 0.22      |      | 4.96  | 0.01      | Up   | 4.38  | 0.01  | Up   | protein dimerizations                                                            |          |
| Pc_TC022631 | -0.67 | 0.28  |      | -0.65 | 0.37      |      | 2.41  | 0.02      | Up   | 1.02  | 0.13  |      | Domain of unknown function (DUF1995)                                             |          |
| Pc_TC022633 | -0.07 | 1     |      | -1.33 | 0.31      |      | 2.36  | 0.05      | Up   | 0.91  | 0.36  |      | Domain of unknown function (DUF1995)                                             |          |
| Pc_TC022649 | 2.38  | ##### | Up   | 0.99  | 0.21      |      | 1.81  | 0.1       |      | 0.86  | 0.28  |      | RING/FYVE/PHD zinc finger superfamily protein                                    |          |
| Pc_TC022652 | -1.97 | 0     | Down | -0.73 | 0.27      |      | -0.66 | 0.52      |      | 0.64  | 0.32  |      | RING/FYVE/PHD zinc finger superfamily protein                                    |          |
| Pc_TC022669 | -1.42 | 0.07  |      | -2.03 | 0.03      | Down | 0.84  | 0.45      |      | 0.9   | 0.23  |      | MAP kinase 9                                                                     |          |
| Pc_TC022694 | 2.66  | 0.31  |      | 3.96  | 0.05      | Up   | -0.5  | 1         |      | 2.63  | 0.32  |      | cycloartenol synthase 1                                                          |          |
| Pc_TC022709 | 1.07  | 0.04  | Up   | 1.11  | 0.07      |      | 0.41  | 0.69      |      | 0.84  | 0.21  |      | phosphatidate cytidyltransferase family protein                                  |          |
| Pc_TC022713 | 1.1   | 0.15  |      | 1.27  | 0.14      |      | -3.13 | 0.05      | Down | -0.24 | 0.83  |      | phosphatidate cytidyltransferase family protein                                  |          |
| Pc_TC022714 | -1.45 | 0.04  | Down | -0.96 | 0.22      |      | 0.1   | 0.93      |      | 0.26  | 0.73  |      | phosphatidate cytidyltransferase family protein                                  |          |
| Pc_TC022738 | -0.29 | 0.69  |      | -1.65 | 0.06      |      | 2.82  | 0.01      | Up   | 0.63  | 0.41  |      | Ribulose biphosphate carboxylase (small chain) family protein                    |          |
| Pc_TC022776 | -1.86 | 0.04  | Down | -1.47 | 0.14      |      | -2.56 | 0.06      |      | -1.73 | 0.08  |      | Protein kinase superfamily protein                                               |          |
| Pc_TC022777 | 0.34  | 0.41  |      | 0.75  | 0.14      |      | -1.96 | 0.05      | Down | -1.07 | 0.08  |      | Protein kinase superfamily protein                                               |          |
| Pc_TC022823 | -0.18 | 0.8   |      | 0.34  | 0.65      |      | -2.25 | 0.06      |      | -1.75 | 0.04  | Down | unknown protein                                                                  |          |
| Pc_TC022825 | -1.96 | 0     | Down | -0.68 | 0.23      |      | 0.04  | 0.97      |      | -1.16 | 0.06  |      | STRUBBELIG-receptor family 3                                                     |          |
| Pc_TC022833 | 0.79  | 0.01  |      | 1.09  | 0.01      | Up   | -0.15 | 0.86      |      | 0.88  | 0.08  |      | 4-coumarate:CoA ligase 1                                                         |          |
| Pc_TC022837 | 1.05  | 0.1   |      | 1.29  | 0.08      |      | -0.68 | 0.56      |      | 1.65  | 0.02  | Up   | FGGY family of carbohydrate kinase                                               |          |
| Pc_TC022852 | 1.03  | 0.05  |      | 1.74  | 0         | Up   | 0.11  | 0.92      |      | 0.64  | 0.35  |      | WRKY DNA-binding protein 60                                                      | WRKY     |
| Pc_TC022881 | 0.08  | 1     |      | 4.06  | 0         | Up   | 2.31  | 0.3       |      | 1.43  | 0.58  |      | Expressed protein                                                                |          |
| Pc_TC022885 | -0.25 | 0.66  |      | -1    | 0.15      |      | 1.71  | 0.08      |      | 1.51  | 0.02  | Up   | STRUBBELIG-receptor family 8                                                     |          |
| Pc_TC022888 | 1.97  | 0.02  | Up   | 3.41  | 4.00E-005 | Up   | 0.5   | 0.74      |      | 0.75  | 0.49  |      | alpha/beta-Hydrolases superfamily protein                                        |          |
| Pc_TC022900 | 0.26  | 0.66  |      | 0.08  | 0.92      |      | 2.48  | 0.01      | Up   | 1.19  | 0.08  |      | cellulose synthase-like A02                                                      |          |
| Pc_TC022914 | -3    | 0     | Down | -4.16 | 7.10E-005 | Down | -2.23 | 0.06      |      | -1.33 | 0.1   |      | homolog of mammalian P58IPK                                                      | TPR      |
| Pc_TC022919 | -1.72 | 0     | Down | -2.17 | 0         | Down | 0.87  | 0.33      |      | 0.19  | 0.74  |      | Seven transmembrane MLO family protein                                           |          |
| Pc_TC022922 | -1.16 | 0     | Down | -1.9  | 0         | Down | 1.38  | 0.11      |      | 0.41  | 0.45  |      | photosystem I light harvesting complex gene 3                                    |          |
| Pc_TC022945 | 1.23  | 0.01  | Up   | 0.92  | 0.12      |      | 0.42  | 0.67      |      | 0.77  | 0.23  |      | FAR1-related sequence 5                                                          | FAR1     |
| Pc_TC022946 | -0.99 | 0.25  |      | -2.16 | 0.05      | Down | 1.1   | 0.34      |      | 0.34  | 0.71  |      | Galactose oxidase/kelch repeat superfamily protein                               |          |
| Pc_TC022961 | 0.89  | 0.06  |      | 1.9   | 0         | Up   | -1.1  | 0.29      |      | 0.79  | 0.21  |      | 3-ketoacyl-CoA synthase 11                                                       |          |
| Pc_TC022970 | 2.08  | 0.54  |      | 2.06  | 0.59      |      | 4.5   | 0.03      | Up   | 4.02  | 0.03  | Up   | lysophospholipase 2                                                              |          |
| Pc_TC023007 | -0.83 | 0.19  |      | -0.52 | 0.48      |      | 2.08  | 0.04      | Up   | 1.64  | 0.01  | Up   | GATA type zinc finger transcription factor family protein                        | C2C2-Dof |
| Pc_TC023010 | -2.37 | 0     | Down | -1    | 0.17      |      | -1.95 | 0.08      |      | -1.2  | 0.11  |      | Protein kinase superfamily protein                                               |          |
| Pc_TC023014 | 0.56  | 0.16  |      | 0.11  | 0.83      |      | -2.54 | 0.01      | Down | -1.44 | 0.02  | Down | unknown protein                                                                  |          |
| Pc_TC023015 | 0.39  | 0.34  |      | 0.13  | 0.8       |      | -2.98 | 0         | Down | -1.93 | 0     | Down | unknown protein                                                                  |          |
| Pc_TC023018 | -0.99 | 0.07  |      | -0.69 | 0.29      |      | -0.6  | 0.56      |      | -1.54 | 0.03  | Down | Calcium-binding EF hand family protein                                           |          |
| Pc_TC023034 | 1.03  | 0.02  | Up   | 0.49  | 0.38      |      | -0.1  | 0.92      |      | -0.01 | 0.99  |      | oxidative stress 3                                                               |          |
| Pc_TC023037 | -1.55 | 0.1   |      | -2.34 | 0.04      | Down | 1.37  | 0.24      |      | 0.61  | 0.49  |      | Protein kinase family protein with leucine-rich repeat domain                    |          |
| Pc_TC023038 | -1.17 | 0.02  | Down | -2.12 | 0         | Down | 1.26  | 0.18      |      | 0.55  | 0.37  |      | Protein kinase family protein with leucine-rich repeat domain                    |          |
| Pc_TC023043 | -0.8  | 0.38  |      | -0.16 | 0.9       |      | 3.23  | 0         | Up   | 1.18  | 0.16  |      | protodermal factor 1                                                             |          |
| Pc_TC023062 | -0.48 | 0.42  |      | -0.88 | 0.22      |      | -2.42 | 0.03      | Down | -0.62 | 0.39  |      | actin-related protein C3                                                         |          |
| Pc_TC023068 | 0.08  | 1     |      | 0.06  | 1         |      | 4.95  | 0         | Up   | 2.68  | 0.07  |      | Peroxidase superfamily protein                                                   |          |
| Pc_TC023073 | 0.58  | 0.42  |      | -0.42 | 0.66      |      | 0.97  | 0.39      |      | 2.55  | 0     | Up   | Peroxidase superfamily protein                                                   |          |
| Pc_TC023095 | 0.53  | 0.07  |      | 0.79  | 0.03      |      | -3.88 | 2.28E-005 | Down | -2.23 | ##### | Down | sodium/calcium exchanger family protein / calcium-binding EF hand family protein |          |
| Pc_TC023096 | 0.25  | 0.43  |      | 0.28  | 0.5       |      | -3.34 | 0         | Down | -2.54 | ##### | Down | sodium/calcium exchanger family protein / calcium-binding EF hand family protein |          |
| Pc_TC023115 | 0.54  | 0.53  |      | 0.24  | 0.83      |      | 3.52  | 0         | Up   | 2.72  | 0     | Up   | Pectin lyase-like superfamily protein                                            |          |
| Pc_TC023126 | 2.82  | 0.04  | Up   | 1.93  | 0.29      |      | 0.5   | 0.95      |      | 0.04  | 1     |      | unknown protein                                                                  |          |
| Pc_TC023139 | -1.87 | 0.01  | Down | -1.07 | 0.2       |      | -2.58 | 0.04      | Down | -0.26 | 0.75  |      | phosphoribosylanthranilate isomerase 1                                           |          |
| Pc_TC023145 | 1.18  | 0.09  |      | 1.64  | 0.04      | Up   | -4.27 | 0.01      | Down | -2.03 | 0.05  | Down | expansin 11                                                                      |          |
| Pc_TC023158 | 0     | 1     |      | 1.02  | 0.22      |      | -3.23 | 0.03      | Down | -3.7  | 0     | Down | disease resistance family protein / LRR family protein                           |          |

|             |       |       |      |  |       |           |      |       |      |      |  |       |      |      |                                                                      |      |
|-------------|-------|-------|------|--|-------|-----------|------|-------|------|------|--|-------|------|------|----------------------------------------------------------------------|------|
| Pc_TC023179 | -0.25 | 0.42  |      |  | -1    | 0.01      | Down | 1.34  | 0.11 |      |  | 0.84  | 0.09 |      | elongation factor family protein                                     |      |
| Pc_TC023211 | 0.23  | 0.46  |      |  | 0.23  | 0.56      |      | -2.79 | 0    | Down |  | -1.78 | 0    | Down | Nodulin MtN3 family protein                                          |      |
| Pc_TC023228 | 0     | 0.44  |      |  | 0     | 0.48      |      | 4.43  | 0    | Up   |  | 3.13  | 0.02 | Up   | FASCICLIN-like arabinogalactan 6                                     |      |
| Pc_TC023229 | -1.14 | 0.61  |      |  | 0.95  | 0.55      |      | 3.84  | 0    | Up   |  | 2.63  | 0.02 | Up   | FASCICLIN-like arabinogalactan protein 13 precursor                  |      |
| Pc_TC023237 | 0.58  | 0.1   |      |  | 0.75  | 0.09      |      | -1.96 | 0.03 | Down |  | -0.33 | 0.54 |      | Calcium-dependent lipid-binding (CaLB domain) family protein         |      |
| Pc_TC023241 | 0.66  | 0.14  |      |  | 1.25  | 0.02      | Up   | -1.78 | 0.08 |      |  | 0.21  | 0.74 |      | Eukaryotic aspartyl protease family protein                          |      |
| Pc_TC023254 | 0.04  | 0.97  |      |  | -0.13 | 0.87      |      | 0.41  | 0.71 |      |  | 1.62  | 0.02 | Up   | pleiotropic drug resistance 6                                        |      |
| Pc_TC023265 | 0     | 1     |      |  | -1.53 | 0.05      | Down | -1.29 | 0.24 |      |  | 0.34  | 0.64 |      | Ribosomal protein L1p/L10e family                                    |      |
| Pc_TC023273 | 0.17  | 0.71  |      |  | -0.15 | 0.8       |      | -1.46 | 0.15 |      |  | -1.45 | 0.03 | Down | Uncharacterized protein                                              |      |
| Pc_TC023280 | -1.06 | 0.09  |      |  | -2.02 | 0.01      | Down | 1.5   | 0.13 |      |  | -0.08 | 0.92 |      | Rhomboid-related intramembrane serine protease family protein        |      |
| Pc_TC023320 | 0.03  | 0.98  |      |  | -0.36 | 0.61      |      | -2.53 | 0.03 | Down |  | -0.81 | 0.27 |      | Sec1/munc18-like (SM) proteins superfamily                           |      |
| Pc_TC023357 | 1.89  | 0.01  | Up   |  | 2.97  | 0         | Up   | 0.84  | 0.52 |      |  | 1.82  | 0.04 | Up   | cinnamate-4-hydroxylase                                              |      |
| Pc_TC023358 | 1.94  | 0     | Up   |  | 2.25  | 0         | Up   | 0.73  | 0.54 |      |  | 2.03  | 0.01 | Up   | cinnamate-4-hydroxylase                                              |      |
| Pc_TC023373 | 1.27  | 0.03  | Up   |  | 2.28  | 0         | Up   | -0.53 | 0.64 |      |  | 0.14  | 0.86 |      | Eukaryotic aspartyl protease family protein                          |      |
| Pc_TC023397 | 0.3   | 0.34  |      |  | 0.41  | 0.27      |      | -2.06 | 0.02 | Down |  | -1.24 | 0.02 | Down | Tetratricopeptide repeat (TPR)-like superfamily protein              | TPR  |
| Pc_TC023404 | 0.36  | 0.4   |      |  | 0.31  | 0.57      |      | 1.83  | 0.04 | Up   |  | 1.3   | 0.02 | Up   | Nucleotide-diphospho-sugar transferases superfamily protein          |      |
| Pc_TC023411 | -2.14 | 0.01  | Down |  | 0.29  | 0.73      |      | -0.93 | 0.43 |      |  | -1.6  | 0.07 |      | unknown protein                                                      |      |
| Pc_TC023425 | 0.68  | 0.28  |      |  | 1.39  | 0.05      | Up   | -1.85 | 0.12 |      |  | -1.03 | 0.21 |      | Putative uncharacterized protein                                     |      |
| Pc_TC023432 | 0.3   | 0.31  |      |  | 0.53  | 0.16      |      | -1.93 | 0.02 | Down |  | -1.12 | 0.02 | Down | Protein kinase superfamily protein                                   |      |
| Pc_TC023467 | 1.58  | ##### | Up   |  | 1.15  | 0.02      | Up   | -0.95 | 0.32 |      |  | 0.23  | 0.7  |      | Uncharacterized protein                                              |      |
| Pc_TC023471 | 0.24  | 0.47  |      |  | 0.57  | 0.17      |      | -1.76 | 0.05 | Down |  | -1.56 | 0    | Down | heat shock transcription factor A3                                   | HSF  |
| Pc_TC023472 | 0.09  | 0.81  |      |  | 0.28  | 0.53      |      | -1.78 | 0.05 |      |  | -1.66 | 0    | Down | heat shock transcription factor A3                                   | HSF  |
| Pc_TC023496 | 1.96  | ##### | Up   |  | 0.71  | 0.26      |      | -0.34 | 0.75 |      |  | 0.39  | 0.56 |      | cell wall invertase 2                                                |      |
| Pc_TC023497 | -0.45 | 0.3   |      |  | 0.35  | 0.5       |      | -2.04 | 0.04 | Down |  | -0.38 | 0.51 |      | cell wall invertase 2                                                |      |
| Pc_TC023508 | 0.58  | 0.39  |      |  | -0.63 | 0.47      |      | 1.57  | 0.15 |      |  | 1.61  | 0.03 | Up   | 2-cysteine peroxiredoxin B                                           |      |
| Pc_TC023517 | 0.29  | 0.33  |      |  | 0.52  | 0.18      |      | -1.29 | 0.13 |      |  | -1.01 | 0.04 | Down | Pyridoxal phosphate (PLP)-dependent transferases superfamily protein |      |
| Pc_TC023576 | -1.23 | 0.11  |      |  | -3.01 | 0         | Down | -2.76 | 0.03 | Down |  | -1.4  | 0.11 |      | glutathione S-transferase zeta 1                                     |      |
| Pc_TC023591 | 0.17  | 0.74  |      |  | 0.47  | 0.44      |      | -2.9  | 0.01 | Down |  | -1.32 | 0.06 |      | homeobox protein 2                                                   | HB   |
| Pc_TC023594 | -0.08 | 0.88  |      |  | -0.04 | 0.95      |      | -1.84 | 0.09 |      |  | -1.48 | 0.04 | Down | Protein of unknown function (DUF3537)                                |      |
| Pc_TC023607 | 1.13  | 0     | Up   |  | -0.51 | 0.33      |      | 0.48  | 0.6  |      |  | 1.07  | 0.05 | Up   | cytochrome P450, family 71, subfamily A, polypeptide 20              |      |
| Pc_TC023609 | -1.86 | 0.02  | Down |  | -2.55 | 0.01      | Down | 0.49  | 0.66 |      |  | -0.5  | 0.55 |      | Terpenoid cyclases/Protein prenyltransferases superfamily protein    |      |
| Pc_TC023612 | 0.1   | 0.88  |      |  | 1.29  | 0.04      | Up   | -1.7  | 0.13 |      |  | -0.1  | 0.9  |      | GTP cyclohydrolase II                                                |      |
| Pc_TC023620 | 0     | 0.64  |      |  | 1.64  | 0.53      |      | 3.09  | 0.11 |      |  | 3.27  | 0.04 | Up   | Major facilitator superfamily protein                                |      |
| Pc_TC023621 | -0.13 | 0.86  |      |  | -0.65 | 0.41      |      | -0.39 | 0.73 |      |  | -2.01 | 0.02 | Down | Major facilitator superfamily protein                                |      |
| Pc_TC023641 | -4.31 | 0.01  | Down |  | -3.33 | 0.04      | Down | -0.8  | 0.6  |      |  | -3.18 | 0.03 | Down | Plasma-membrane choline transporter family protein                   |      |
| Pc_TC023642 | -0.15 | 0.75  |      |  | -1.61 | 0.01      | Down | -0.66 | 0.49 |      |  | -0.72 | 0.24 |      | general regulatory factor 7                                          |      |
| Pc_TC023647 | 0.57  | 0.37  |      |  | 1.59  | 0.02      | Up   | -0.97 | 0.4  |      |  | 0.05  | 0.97 |      | prohibitin 3                                                         |      |
| Pc_TC023665 | -2.14 | 0.17  |      |  | -1.75 | 0.28      |      | 2.78  | 0.03 | Up   |  | 1.07  | 0.32 |      | alpha/beta-Hydrolases superfamily protein                            |      |
| Pc_TC023674 | 0.68  | 0.07  |      |  | 1.01  | 0.03      | Up   | -1.1  | 0.23 |      |  | 0.08  | 0.89 |      | Hypoxia-responsive family protein                                    |      |
| Pc_TC023681 | -0.75 | 0.06  |      |  | -1.73 | 0         | Down | 2.3   | 0.01 | Up   |  | 1.3   | 0.01 | Up   | phosphate transporter 2;1                                            |      |
| Pc_TC023690 | 0.11  | 0.79  |      |  | 0.26  | 0.6       |      | -1.36 | 0.14 |      |  | -1.5  | 0.01 | Down | beta-1,4-N-acetylglucosaminyltransferase family protein              |      |
| Pc_TC023695 | -0.59 | 0.11  |      |  | -1    | 0.04      | Down | 1.88  | 0.03 | Up   |  | 1.16  | 0.03 | Up   | Rhodanese/Cell cycle control phosphatase superfamily protein         |      |
| Pc_TC023699 | 0.66  | 0.62  |      |  | 2.49  | 0.02      | Up   | 1.23  | 0.42 |      |  | 0.76  | 0.56 |      | vacuolar protein sorting-associated protein 20.2                     |      |
| Pc_TC023734 | 0.38  | 0.79  |      |  | 0.45  | 0.76      |      | 3.64  | 0    | Up   |  | 2.67  | 0    | Up   | basic helix-loop-helix (bHLH) DNA-binding superfamily protein        | bHLH |
| Pc_TC023741 | 1.49  | 0.05  |      |  | 2.09  | 0.01      | Up   | 0.45  | 0.74 |      |  | 0.48  | 0.63 |      | homolog of carrot EP3-3 chitinase                                    |      |
| Pc_TC023756 | 1.05  | 0.11  |      |  | 0.25  | 0.77      |      | -1.89 | 0.14 |      |  | -2.07 | 0.03 | Down | ACT domain-containing small subunit of acetolactate synthase protein |      |
| Pc_TC023757 | -1.06 | 0.01  | Down |  | -0.72 | 0.16      |      | -0.17 | 0.85 |      |  | -0.69 | 0.23 |      | ACT domain-containing small subunit of acetolactate synthase protein |      |
| Pc_TC023769 | 0.57  | 0.06  |      |  | 0.8   | 0.03      |      | -2.13 | 0.02 | Down |  | -0.7  | 0.16 |      | Adenosylmethionine decarboxylase family protein                      |      |
| Pc_TC023781 | 1.02  | 0.33  |      |  | 2.24  | 0.02      | Up   | -4.2  | 0.07 |      |  | -0.17 | 0.96 |      | BTB/POZ domain with WD40/YVTN repeat-like protein                    |      |
| Pc_TC023786 | -2.73 | 0     | Down |  | -2.11 | 0.03      | Down | 0.03  | 0.99 |      |  | -0.96 | 0.27 |      | adenine phosphoribosyl transferase 3                                 |      |
| Pc_TC023787 | 1.11  | 0.2   |      |  | -0.18 | 0.93      |      | 2.5   | 0.04 | Up   |  | -0.61 | 0.62 |      | adenine phosphoribosyl transferase 2                                 |      |
| Pc_TC023794 | -0.61 | 0.29  |      |  | -0.58 | 0.39      |      | 3.27  | 0    | Up   |  | 2.06  | 0    | Up   | Plant protein of unknown function (DUF869)                           |      |
| Pc_TC023795 | -0.74 | 0.06  |      |  | -2.6  | 3.22E-006 | Down | 1.63  | 0.06 |      |  | 1.2   | 0.02 | Up   | Leucine-rich repeat protein kinase family protein                    |      |
| Pc_TC023796 | -0.84 | 0.01  |      |  | -3.08 | 4.99E-011 | Down | 1.44  | 0.08 |      |  | 1.01  | 0.04 | Up   | Leucine-rich repeat protein kinase family protein                    |      |
| Pc_TC023797 | -0.28 | 0.64  |      |  | -3.26 | 0         | Down | 1.83  | 0.07 |      |  | 1     | 0.14 |      | Leucine-rich repeat protein kinase family protein                    |      |
| Pc_TC023798 | -0.01 | 1     |      |  | -1.23 | 0.1       |      | 2.14  | 0.03 | Up   |  | 1.77  | 0.01 | Up   | Leucine-rich repeat protein kinase family protein                    |      |
| Pc_TC023799 | -2.62 | 0.03  | Down |  | -0.47 | 0.69      |      | 3.87  | 0    | Up   |  | 2.26  | 0.01 | Up   | Leucine-rich repeat (LRR) family protein                             |      |
| Pc_TC023806 | -1.85 | 0.02  | Down |  | -0.8  | 0.34      |      | 2.02  | 0.06 |      |  | 1.42  | 0.05 | Up   | Protein of unknown function (DUF3741)                                |      |
| Pc_TC023807 | -1.82 | 0.02  | Down |  | 0.16  | 0.85      |      | 2.12  | 0.04 | Up   |  | 0.97  | 0.18 |      | Protein of unknown function (DUF3741)                                |      |
| Pc_TC023810 | -1.02 | 0.13  |      |  | -2.17 | 0.01      | Down | 2.04  | 0.05 | Up   |  | 1.15  | 0.1  |      | protein phosphatase 2A 55 kDa regulatory subunit B alpha isoform     |      |
| Pc_TC023821 | 0.49  | 0.96  |      |  | 3.17  | 0.02      | Up   | 1.09  | 0.69 |      |  | 1.36  | 0.5  |      | Long-chain fatty alcohol dehydrogenase family protein                |      |
| Pc_TC023826 | -0.02 | 1     |      |  | -0.3  | 0.76      |      | -3.18 | 0.03 | Down |  | -1.28 | 0.18 |      | NAC domain containing protein 74                                     | NAC  |



|             |       |      |      |       |      |      |       |           |      |       |       |      |                                                                                           |                       |
|-------------|-------|------|------|-------|------|------|-------|-----------|------|-------|-------|------|-------------------------------------------------------------------------------------------|-----------------------|
| Pc_TC023831 | 0.47  | 0.47 |      | 1.83  | 0.01 | Up   | -1.23 | 0.3       |      | 0.78  | 0.3   |      | PHE ammonia lyase 1                                                                       |                       |
| Pc_TC023837 | -0.08 | 0.88 |      | -0.54 | 0.39 |      | 2.56  | 0.01      | Up   | 1.43  | 0.02  | Up   | Nucleotide/sugar transporter family protein                                               |                       |
| Pc_TC023838 | 0.19  | 0.94 |      | 0.45  | 0.76 |      | 2.86  | 0.02      | Up   | 1.76  | 0.08  |      | auxin response factor 10                                                                  | ABI3VP1, ARF, AUX/IAA |
| Pc_TC023841 | 0.94  | 0.28 |      | 2.61  | 0    | Up   | -0.5  | 0.75      |      | 0.38  | 0.74  |      | plasma membrane intrinsic protein 2;4                                                     |                       |
| Pc_TC023842 | 0.72  | 0.36 |      | 1.69  | 0.04 | Up   | 0.48  | 0.71      |      | -1.29 | 0.22  |      | low-molecular-weight cysteine-rich 69                                                     |                       |
| Pc_TC023844 | 0.08  | 0.92 |      | -0.09 | 0.92 |      | -1.22 | 0.29      |      | -1.71 | 0.04  | Down | gibberellin 2-oxidase 8                                                                   |                       |
| Pc_TC023864 | -0.6  | 0.12 |      | -1.01 | 0.04 | Down | -1.78 | 0.06      |      | -2.34 | ##### | Down | proteasome subunit PAB1                                                                   |                       |
| Pc_TC023869 | 1.19  | 0.07 |      | -0.16 | 0.87 |      | 1.67  | 0.13      |      | 1.88  | 0.01  | Up   | Putative uncharacterized protein OJ1581 H09.4                                             |                       |
| Pc_TC023871 | -0.6  | 0.11 |      | -1.09 | 0.03 | Down | 1.44  | 0.09      |      | 0.84  | 0.11  |      | P-loop containing nucleoside triphosphate hydrolases superfamily protein                  |                       |
| Pc_TC023875 | -1.39 | 0.04 | Down | 0.52  | 0.45 |      | 0.02  | 0.99      |      | -0.55 | 0.47  |      | Plant protein of unknown function (DUF639)                                                |                       |
| Pc_TC023889 | -0.23 | 0.79 |      | 0.39  | 0.66 |      | -2.88 | 0.04      | Down | -0.5  | 0.58  |      | myb domain protein 19                                                                     | MYB, MYB-related      |
| Pc_TC023903 | -0.34 | 1    |      | -0.94 | 0.84 |      | 3.43  | 0.02      | Up   | 2.71  | 0.04  | Up   | magnesium/proton exchanger                                                                |                       |
| Pc_TC023914 | 0.08  | 1    |      | -1.36 | 0.54 |      | 2.98  | 0.03      | Up   | 1.98  | 0.08  |      | aldehyde dehydrogenase 3F1                                                                |                       |
| Pc_TC023931 | 0.55  | 0.32 |      | 0.65  | 0.32 |      | -2.43 | 0.03      | Down | -1.25 | 0.09  |      | Major facilitator superfamily protein                                                     |                       |
| Pc_TC023942 | -1.34 | 0.09 |      | 0.93  | 0.23 |      | -1.57 | 0.2       |      | -1.87 | 0.04  | Down | alpha/beta-Hydrolases superfamily protein                                                 |                       |
| Pc_TC023946 | 2.02  | 0.03 | Up   | 1.6   | 0.14 |      | 1.17  | 0.42      |      | 0.29  | 0.87  |      | cationic amino acid transporter 9                                                         |                       |
| Pc_TC023953 | 0.56  | 0.82 |      | 2.54  | 0.05 | Up   | -1.23 | 0.68      |      | -1.11 | 0.68  |      | Plant protein of unknown function (DUF828) with plant pleckstrin homology-like region     |                       |
| Pc_TC023966 | 0.01  | 1    |      | 0.98  | 0.13 |      | -0.78 | 0.47      |      | -1.97 | 0.01  | Down | Haloacid dehalogenase-like hydrolase (HAD) superfamily protein                            |                       |
| Pc_TC023967 | -1.68 | 0.06 |      | -0.04 | 0.99 |      | -2.26 | 0.1       |      | -3.03 | 0.01  | Down | Haloacid dehalogenase-like hydrolase (HAD) superfamily protein                            |                       |
| Pc_TC023969 | -2.12 | 0.02 | Down | -1.38 | 0.16 |      | 0.46  | 0.71      |      | -0.65 | 0.48  |      | Uncharacterized protein                                                                   |                       |
| Pc_TC023972 | -1.39 | 0.07 |      | -0.27 | 0.76 |      | 4.63  | 8.33E-006 | Up   | 2.99  | ##### | Up   | Bifunctional inhibitor/lipid-transfer protein/seed storage 2S albumin superfamily protein |                       |
| Pc_TC023976 | -4.24 | 0.01 | Down | -2.26 | 0.12 |      | 0.57  | 0.68      |      | 0.06  | 1     |      | WD-40 repeat family protein / beige-related                                               |                       |
| Pc_TC023990 | -0.11 | 0.91 |      | 0.5   | 0.56 |      | 2.27  | 0.04      | Up   | 1.48  | 0.05  |      | cytochrome P450, family 86, subfamily A, polypeptide 7                                    |                       |
| Pc_TC024014 | 0     | 0.64 |      | 2.06  | 0.36 |      | 2.59  | 0.22      |      | 3.21  | 0.04  | Up   | indeterminate(ID)-domain 12                                                               |                       |
| Pc_TC024019 | -0.16 | 0.94 |      | 0.44  | 0.71 |      | -0.73 | 0.63      |      | -3.11 | 0.03  | Down | DNA-directed RNA polymerase, subunit M, archaeal                                          |                       |
| Pc_TC024027 | 0.56  | 0.52 |      | 0.54  | 0.59 |      | -3.72 | 0.03      | Down | -2.18 | 0.06  |      | MATE efflux family protein                                                                |                       |
| Pc_TC024070 | 2.66  | 0    | Up   | 0.91  | 0.5  |      | -1.01 | 0.61      |      | -0.7  | 0.69  |      | GPI transamidase subunit PIG-U                                                            |                       |
| Pc_TC024071 | -0.17 | 0.9  |      | 1.48  | 0.1  |      | 0     | 0         |      | -3.02 | 0.02  | Down | ETHYLENE-INSENSITIVE3-like 1                                                              | EIL                   |
| Pc_TC024075 | -0.21 | 0.86 |      | -0.11 | 0.96 |      | 1.6   | 0.18      |      | 1.8   | 0.03  | Up   | Ribosomal L18p/L5e family protein                                                         |                       |
| Pc_TC024093 | -0.53 | 0.39 |      | -2.97 | 0    | Down | 1.52  | 0.13      |      | 0.43  | 0.54  |      | Protein kinase superfamily protein                                                        |                       |
| Pc_TC024097 | 1.25  | 0.09 |      | 1.96  | 0.02 | Up   | 0.53  | 0.68      |      | 0.23  | 0.84  |      | xyloglucan endotransglucosylase/hydrolase 30                                              |                       |
| Pc_TC024107 | 0.35  | 0.33 |      | 0.4   | 0.38 |      | -2.07 | 0.03      | Down | -0.5  | 0.35  |      | ADP-ribosylation factor B1B                                                               |                       |
| Pc_TC024122 | 0.73  | 0.34 |      | 0.87  | 0.31 |      | -5.71 | 0         | Down | -3    | 0.01  | Down | Putative uncharacterized protein                                                          |                       |
| Pc_TC024128 | 2.08  | 0.01 | Up   | 3.25  | 0    | Up   | 0.5   | 0.76      |      | 1.03  | 0.35  |      | RHO guanyl-nucleotide exchange factor 14                                                  |                       |
| Pc_TC024130 | -0.35 | 0.5  |      | -1.18 | 0.07 |      | -2.66 | 0.02      | Down | -1.99 | 0.01  | Down | RHO guanyl-nucleotide exchange factor 14                                                  |                       |
| Pc_TC024131 | 0.46  | 0.63 |      | 0.58  | 0.58 |      | 2.2   | 0.06      |      | 1.79  | 0.04  | Up   | Protein of unknown function (DUF1218)                                                     |                       |
| Pc_TC024133 | 0.46  | 0.41 |      | 1.87  | 0    | Up   | -0.63 | 0.55      |      | -0.28 | 0.7   |      | cytochrome P450, family 707, subfamily A, polypeptide 1                                   |                       |
| Pc_TC024136 | 0     | 0.02 |      | -2.75 | 0.13 |      | 2.92  | 0.02      | Up   | 1.07  | 0.32  |      | nine-cis-epoxycarotenoid dioxygenase 4                                                    |                       |
| Pc_TC024142 | 0.49  | 0.47 |      | 0.12  | 0.9  |      | 1.94  | 0.07      |      | 1.58  | 0.03  | Up   | alpha/beta-Hydrolases superfamily protein                                                 |                       |
| Pc_TC024151 | 0.36  | 0.23 |      | 0.31  | 0.42 |      | -2.22 | 0.01      | Down | -1.23 | 0.01  | Down | Adenine nucleotide alpha hydrolases-like superfamily protein                              |                       |
| Pc_TC024168 | 0.42  | 0.53 |      | 0.29  | 0.73 |      | -2.63 | 0.04      | Down | -0.72 | 0.39  |      | Putative uncharacterized protein                                                          |                       |
| Pc_TC024178 | -0.64 | 0.31 |      | 0.35  | 0.62 |      | 2.41  | 0.02      | Up   | 1.28  | 0.06  |      | Phosphofructokinase family protein                                                        |                       |
| Pc_TC024181 | 0.62  | 0.43 |      | -0.75 | 0.47 |      | 2.05  | 0.07      |      | 2.12  | 0.01  | Up   | xylem cysteine peptidase 1                                                                |                       |
| Pc_TC024187 | 1.07  | 0    | Up   | 1.12  | 0.01 | Up   | -2.72 | 0         | Down | -0.06 | 0.91  |      | NITRATE TRANSPORTER 1.8                                                                   |                       |
| Pc_TC024192 | 0.58  | 0.32 |      | 1.54  | 0.02 | Up   | -0.33 | 0.77      |      | 1.02  | 0.14  |      | unknown protein                                                                           |                       |
| Pc_TC024198 | 0.32  | 0.29 |      | 0.51  | 0.18 |      | -1.82 | 0.03      | Down | -1.26 | 0.01  | Down | fimbrin-like protein 2                                                                    |                       |
| Pc_TC024199 | 2.08  | 0.54 |      | 2.06  | 0.59 |      | 3.09  | 0.24      |      | 4.48  | 0.01  | Up   | S-adenosyl-L-methionine-dependent methyltransferases superfamily protein                  |                       |
| Pc_TC024209 | 1.08  | 0.65 |      | 0.8   | 0.82 |      | 3.38  | 0.04      | Up   | 2.13  | 0.19  |      | ubiquitin-conjugating enzyme 11                                                           |                       |
| Pc_TC024223 | -1.89 | 0.04 | Down | -1.91 | 0.07 |      | 0.47  | 0.7       |      | -0.22 | 0.83  |      | indole-3-acetic acid inducible 31                                                         | AUX/IAA               |
| Pc_TC024228 | 0.84  | 0.28 |      | 0.22  | 0.84 |      | 0.29  | 0.83      |      | 2.82  | 0     | Up   | cellulose synthase like E1                                                                |                       |
| Pc_TC024229 | -1.12 | 0.09 |      | -0.86 | 0.26 |      | -0.15 | 0.89      |      | -1.71 | 0.03  | Down | cellulose synthase like E1                                                                |                       |
| Pc_TC024231 | 0.37  | 0.66 |      | 1.72  | 0.03 | Up   | 1.26  | 0.28      |      | 0.13  | 0.92  |      | cellulose synthase like E1                                                                |                       |
| Pc_TC024247 | -0.41 | 0.25 |      | -1.34 | 0    | Down | 1.58  | 0.06      |      | 0.67  | 0.2   |      | calcium sensing receptor                                                                  |                       |
| Pc_TC024251 | 1.27  | 0.01 | Up   | 0.57  | 0.36 |      | 0.54  | 0.59      |      | 1.28  | 0.04  | Up   | aldehyde dehydrogenase 2B7                                                                |                       |
| Pc_TC024252 | 0.86  | 0.12 |      | 1.76  | 0    | Up   | 1.39  | 0.17      |      | 0.87  | 0.2   |      | aldehyde dehydrogenase 2B7                                                                |                       |
| Pc_TC024253 | 1.03  | 0.29 |      | -0.04 | 1    |      | 3.21  | 0.01      | Up   | 0.89  | 0.42  |      | aldehyde dehydrogenase 2B7                                                                |                       |
| Pc_TC024259 | 0.99  | 0.45 |      | 2.23  | 0.05 | Up   | -0.33 | 0.92      |      | 1.33  | 0.29  |      | AGAMOUS-like 16                                                                           | MADS                  |
| Pc_TC024262 | -4.24 | 0.01 | Down | -0.18 | 0.93 |      | -1.82 | 0.25      |      | -1.24 | 0.31  |      | AGAMOUS-like 16                                                                           | MADS                  |
| Pc_TC024272 | -1.26 | 0.01 | Down | -0.64 | 0.25 |      | -0.42 | 0.66      |      | -0.18 | 0.77  |      | Mediator complex subunit Med23 (InterPro:IPRO21629).                                      |                       |
| Pc_TC024276 | 0.04  | 1    |      | 1.12  | 0.19 |      | 0     | 0         |      | -3.5  | 0     | Down | Putative uncharacterized protein                                                          |                       |
| Pc_TC024280 | -0.58 | 0.3  |      | -0.79 | 0.24 |      | 1.91  | 0.05      | Up   | 0.94  | 0.14  |      | Pentatricopeptide repeat (PPR) superfamily protein                                        |                       |
| Pc_TC024281 | 1.47  | 0.03 | Up   | 1.68  | 0.03 | Up   | 0.28  | 0.83      |      | 1.02  | 0.2   |      | MAC/Perforin domain-containing protein                                                    |                       |

|             |       |       |      |       |           |      |       |      |      |       |       |      |                                                                               |         |
|-------------|-------|-------|------|-------|-----------|------|-------|------|------|-------|-------|------|-------------------------------------------------------------------------------|---------|
| Pc_TC024288 | 0.24  | 0.58  |      | 0.97  | 0.06      |      | -2.31 | 0.02 | Down | -1.54 | 0.01  | Down | glucosyl transferase family 8                                                 |         |
| Pc_TC024290 | -2.51 | 0.05  | Down | -1.53 | 0.22      |      | 1.94  | 0.1  |      | 0.95  | 0.31  |      | DP-E2F-like 1                                                                 | E2F-DP  |
| Pc_TC024293 | 0.55  | 0.37  |      | 0.57  | 0.43      |      | -2.58 | 0.03 | Down | -1.19 | 0.13  |      | GDSL-like Lipase/Acylhydrolase superfamily protein                            |         |
| Pc_TC024295 | 0.62  | 0.12  |      | 1.21  | 0.01      | Up   | -2.71 | 0.01 | Down | -1.13 | 0.06  |      | Class III peroxidase 31                                                       |         |
| Pc_TC024296 | 1.1   | 0.13  |      | 2.14  | 0.01      | Up   | -2.54 | 0.08 |      | -0.58 | 0.55  |      | unknown protein                                                               |         |
| Pc_TC024297 | 0.62  | 0.16  |      | 1.68  | 0         | Up   | -3.19 | 0    | Down | -0.71 | 0.26  |      | Matrixin family protein                                                       |         |
| Pc_TC024316 | -0.06 | 0.86  |      | -0.48 | 0.25      |      | 1.72  | 0.04 | Up   | 1     | 0.04  |      | NDH dependent flow 6                                                          |         |
| Pc_TC024322 | -0.07 | 0.89  |      | 0.28  | 0.63      |      | -2.35 | 0.03 | Down | -0.87 | 0.18  |      | NOD26-like intrinsic protein                                                  |         |
| Pc_TC024331 | -3.17 | 0.04  | Down | -2.19 | 0.14      |      | -2.74 | 0.11 |      | 0.02  | 1     |      | HVA22 homologue A                                                             |         |
| Pc_TC024333 | 1.33  | 0.27  |      | 1.92  | 0.11      |      | 3     | 0.03 | Up   | 2.67  | 0.01  | Up   | basic helix-loop-helix (bHLH) DNA-binding superfamily protein                 | bHLH    |
| Pc_TC024345 | 0.51  | 0.26  |      | 0.81  | 0.14      |      | -3.09 | 0    | Down | -1.69 | 0.01  | Down | Protein of unknown function (DUF581)                                          |         |
| Pc_TC024359 | -0.18 | 0.82  |      | 0.47  | 0.55      |      | -3.39 | 0.01 | Down | -1.98 | 0.03  | Down | dentin sialophosphoprotein-related                                            |         |
| Pc_TC024376 | 0.56  | 0.26  |      | 0.99  | 0.1       |      | -0.18 | 0.86 |      | 1.28  | 0.04  | Up   | UDP-glucosyl transferase 85A2                                                 |         |
| Pc_TC024378 | 0.14  | 0.84  |      | 0.8   | 0.26      |      | -2.46 | 0.05 | Down | -2.1  | 0.02  | Down | Phosphate-responsive 1 family protein                                         |         |
| Pc_TC024391 | 0.05  | 0.98  |      | -1.1  | 0.25      |      | -0.23 | 0.86 |      | -3.67 | 0     | Down | HSP20-like chaperones superfamily protein                                     |         |
| Pc_TC024392 | 0.68  | 0.43  |      | 2.48  | 0         | Up   | -1.82 | 0.22 |      | -0.11 | 0.95  |      | HSP20-like chaperones superfamily protein                                     |         |
| Pc_TC024394 | 1.22  | 0.09  |      | 1.67  | 0.04      | Up   | -1.35 | 0.31 |      | -0.13 | 0.91  |      | Os02g0761300 protein                                                          |         |
| Pc_TC024395 | 2.03  | 0.01  | Up   | 3.33  | 2.50E-005 | Up   | -0.63 | 0.67 |      | 1.1   | 0.24  |      | carbon/nitrogen insensitive 1                                                 |         |
| Pc_TC024407 | -2.24 | 0.04  | Down | -1.04 | 0.35      |      | 1.63  | 0.17 |      | 0.99  | 0.26  |      | Ribonuclease E inhibitor RraA/Dimethylmenaquinone methyltransferase           |         |
| Pc_TC024408 | -0.79 | 0.24  |      | -1.49 | 0.07      |      | 2.37  | 0.02 | Up   | 1.08  | 0.13  |      | Ribonuclease E inhibitor RraA/Dimethylmenaquinone methyltransferase           |         |
| Pc_TC024416 | 0.48  | 0.22  |      | -0.01 | 0.99      |      | 1.18  | 0.18 |      | 1.2   | 0.03  | Up   | related to ABI3/VP1 2                                                         | ABI3VP1 |
| Pc_TC024418 | 0.35  | 0.47  |      | -0.17 | 0.78      |      | -1.4  | 0.18 |      | -1.4  | 0.04  | Down | fucosyltransferase 1                                                          |         |
| Pc_TC024422 | 0.63  | 0.24  |      | 1.39  | 0.02      | Up   | -2.52 | 0.03 | Down | 1.2   | 0.06  |      | nitrite reductase 1                                                           |         |
| Pc_TC024441 | 3.12  | 0.01  | Up   | 2.15  | 0.15      |      | 0.96  | 0.69 |      | 1.43  | 0.39  |      | N-terminal nucleophile aminohydrolases (Ntn hydrolases) superfamily protein   |         |
| Pc_TC024448 | -0.23 | 0.65  |      | 0.07  | 0.91      |      | -1.85 | 0.07 |      | -1.67 | 0.01  | Down | ethylene-forming enzyme                                                       |         |
| Pc_TC024449 | 3.08  | ##### | Up   | 2.11  | 0.03      | Up   | 1.92  | 0.14 |      | 3.23  | 0     | Up   | O-Glycosyl hydrolases family 17 protein                                       |         |
| Pc_TC024450 | -1.58 | 0.03  | Down | -0.09 | 0.92      |      | 1.45  | 0.16 |      | 0.33  | 0.65  |      | O-Glycosyl hydrolases family 17 protein                                       |         |
| Pc_TC024451 | -3.11 | 0     | Down | -1.38 | 0.09      |      | -0.32 | 0.78 |      | -2.37 | 0.01  | Down | unknown protein                                                               |         |
| Pc_TC024452 | 1.57  | 0.05  | Up   | -0.01 | 1         |      | 0     | 1    |      | -0.08 | 0.98  |      | unknown protein                                                               |         |
| Pc_TC024453 | 0.2   | 0.79  |      | -0.01 | 1         |      | -3.17 | 0.02 | Down | -1.08 | 0.2   |      | unknown protein                                                               |         |
| Pc_TC024455 | 3.12  | ##### | Up   | 1.37  | 0.14      |      | -0.77 | 0.6  |      | 0.59  | 0.56  |      | unknown protein                                                               |         |
| Pc_TC024456 | -0.29 | 0.56  |      | -0.28 | 0.64      |      | -1.49 | 0.14 |      | -2.19 | 0     | Down | unknown protein                                                               |         |
| Pc_TC024463 | -1.16 | 0.08  |      | -1.86 | 0.02      | Down | -2.51 | 0.03 | Down | -0.88 | 0.24  |      | cyclic nucleotide-binding transporter 1                                       |         |
| Pc_TC024479 | 0.25  | 0.65  |      | 0.35  | 0.6       |      | 1.36  | 0.17 |      | 1.37  | 0.03  | Up   | Leucine-rich receptor-like protein kinase family protein                      |         |
| Pc_TC024480 | 1.19  | 0.07  |      | 1.18  | 0.12      |      | 2     | 0.07 |      | 1.92  | 0.01  | Up   | Leucine-rich receptor-like protein kinase family protein                      |         |
| Pc_TC024483 | 0.48  | 0.37  |      | 1.5   | 0.01      | Up   | -1.71 | 0.11 |      | -0.63 | 0.37  |      | Protein kinase superfamily protein                                            |         |
| Pc_TC024508 | 0.52  | 0.35  |      | 1.56  | 0.01      | Up   | -3.87 | 0    | Down | -1.75 | 0.02  | Down | HSP20-like chaperones superfamily protein                                     |         |
| Pc_TC024512 | 0.73  | 0.32  |      | 2.6   | 0         | Up   | -0.06 | 0.98 |      | 0.79  | 0.35  |      | lysine-ketoglutarate reductase/saccharopine dehydrogenase bifunctional enzyme |         |
| Pc_TC024523 | -0.28 | 0.94  |      | 2.28  | 0.04      | Up   | -0.08 | 1    |      | 0.26  | 0.92  |      | Protein kinase protein with adenine nucleotide alpha hydrolases-like domain   |         |
| Pc_TC024528 | 0.42  | 0.19  |      | 0.81  | 0.05      |      | -2.69 | 0    | Down | -1.5  | 0     | Down | Vacuolar import/degradation/Vid27-related protein                             |         |
| Pc_TC024529 | 0.48  | 0.12  |      | 1.07  | 0.01      | Up   | -2.79 | 0    | Down | -1.18 | 0.02  | Down | trehalose-phosphatase/synthase 9                                              |         |
| Pc_TC024530 | 0.92  | 0.02  |      | 1.79  | 0         | Up   | -3.32 | 0    | Down | -0.81 | 0.16  |      | trehalose-phosphatase/synthase 9                                              |         |
| Pc_TC024531 | 0.44  | 0.13  |      | 0.49  | 0.18      |      | -2.96 | 0    | Down | -1.21 | 0.01  | Down | trehalose-phosphatase/synthase 9                                              |         |
| Pc_TC024552 | -1.53 | 0.04  | Down | -1.94 | 0.03      | Down | -2.16 | 0.08 |      | -1.04 | 0.21  |      | RNA helicase 1                                                                |         |
| Pc_TC024559 | -1.35 | 0.02  | Down | -1.11 | 0.1       |      | 1.28  | 0.19 |      | -0.49 | 0.47  |      | Minichromosome maintenance (MCM2/3/5) family protein                          |         |
| Pc_TC024570 | 0.41  | 0.23  |      | 0.97  | 0.03      |      | -2.13 | 0.02 | Down | -0.55 | 0.31  |      | DNA-binding protein phosphatase 1                                             | DBP     |
| Pc_TC024585 | 0.27  | 0.45  |      | 0.61  | 0.18      |      | -1.93 | 0.04 | Down | 0     | 1     |      | ENTH/ANTH/VHS superfamily protein                                             |         |
| Pc_TC024610 | 0.34  | 0.85  |      | 2.2   | 0.04      | Up   | -0.23 | 0.95 |      | 1.39  | 0.23  |      | phosphoenolpyruvate carboxylase kinase 2                                      |         |
| Pc_TC024625 | 0.28  | 0.76  |      | 0.8   | 0.37      |      | 2.92  | 0.01 | Up   | 2.2   | 0.01  | Up   | P-loop containing nucleoside triphosphate hydrolases superfamily protein      |         |
| Pc_TC024639 | -0.05 | 0.89  |      | 1.01  | 0.02      | Up   | 0.12  | 0.89 |      | 0.49  | 0.36  |      | glutathione-disulfide reductase                                               |         |
| Pc_TC024642 | 1.05  | 0.03  | Up   | 2     | 0         | Up   | -1.46 | 0.17 |      | -0.34 | 0.62  |      | PPPDE putative thiol peptidase family protein                                 |         |
| Pc_TC024644 | -1.78 | 0     | Down | -0.22 | 0.73      |      | 1.84  | 0.05 |      | 0.88  | 0.16  |      | Fatty acid hydroxylase superfamily                                            |         |
| Pc_TC024659 | -2.51 | 0.35  |      | -0.53 | 0.89      |      | 5.02  | 0    | Up   | 4.37  | ##### | Up   | GDSL-like Lipase/Acylhydrolase superfamily protein                            |         |
| Pc_TC024660 | -1.09 | 0.29  |      | -2.37 | 0.07      |      | 3.45  | 0    | Up   | 1.86  | 0.03  | Up   | GDSL-like Lipase/Acylhydrolase superfamily protein                            |         |
| Pc_TC024674 | -1.01 | 0.05  | Down | -1.03 | 0.1       |      | 1.79  | 0.05 |      | 0.77  | 0.2   |      | cytochrome P450, family 97, subfamily A, polypeptide 3                        |         |
| Pc_TC024685 | 0.02  | 0.95  |      | 0.12  | 0.78      |      | -2.18 | 0.02 | Down | -1.81 | 0     | Down | P-loop containing nucleoside triphosphate hydrolases superfamily protein      |         |
| Pc_TC024689 | 0.77  | 0.49  |      | -1.32 | 0.42      |      | 0.61  | 0.7  |      | 2.58  | 0.01  | Up   | Cysteine proteinases superfamily protein                                      |         |
| Pc_TC024690 | -1.36 | 0.01  | Down | -1.61 | 0.01      | Down | 0.11  | 0.91 |      | -0.58 | 0.36  |      | Cysteine proteinases superfamily protein                                      |         |
| Pc_TC024726 | 0.6   | 0.39  |      | 0.56  | 0.49      |      | 1.02  | 0.36 |      | 1.55  | 0.04  | Up   | Expressed protein                                                             |         |
| Pc_TC024772 | -3.09 | 0.04  | Down | -0.2  | 0.92      |      | -2.67 | 0.13 |      | -3.54 | 0.03  | Down | H(+)-ATPase 7                                                                 |         |
| Pc_TC024788 | 2.25  | 0.24  |      | 3.38  | 0.04      | Up   | 0.5   | 1    |      | -1.37 | 0.88  |      | GRAS family transcription factor                                              | GRAS    |
| Pc_TC024807 | 1.72  | 0.02  | Up   | 1.33  | 0.14      |      | 1.93  | 0.1  |      | 2.22  | 0.01  | Up   | Domain of unknown function DUF1990 (InterPro:IPR018960).                      |         |

|             |       |       |      |       |           |      |       |           |      |       |       |      |                                                              |           |
|-------------|-------|-------|------|-------|-----------|------|-------|-----------|------|-------|-------|------|--------------------------------------------------------------|-----------|
| Pc_TC024808 | -0.56 | 0.29  |      | -1.35 | 0.04      | Down | 0.82  | 0.4       |      | 0.3   | 0.63  |      | Domain of unknown function DUF1990 (InterPro:IPR018960).     |           |
| Pc_TC024809 | 0.51  | 0.63  |      | 0.36  | 0.79      |      | 2.5   | 0.04      | Up   | 0.75  | 0.49  |      | Domain of unknown function DUF1990 (InterPro:IPR018960).     |           |
| Pc_TC024810 | 1.97  | 0.01  | Up   | -0.16 | 0.93      |      | 1.55  | 0.21      |      | 0.44  | 0.69  |      | dual specificity protein phosphatase (DsPTP1) family protein |           |
| Pc_TC024811 | -0.28 | 0.61  |      | -0.43 | 0.52      |      | 2.22  | 0.02      | Up   | 0.88  | 0.18  |      | dual specificity protein phosphatase (DsPTP1) family protein |           |
| Pc_TC024829 | -1.66 | 0.01  | Down | -1.35 | 0.08      |      | 1.76  | 0.08      |      | 1.06  | 0.12  |      | Stress responsive alpha-beta barrel domain protein           |           |
| Pc_TC024837 | -0.66 | 0.72  |      | -1.26 | 0.5       |      | -1.01 | 0.61      |      | 2.78  | 0     | Up   | valyl-tRNA synthetase / valine--tRNA ligase (VALRS)          |           |
| Pc_TC024839 | -1.58 | 0     | Down | -0.61 | 0.32      |      | 0.71  | 0.46      |      | 0.36  | 0.56  |      | Transducin family protein / WD-40 repeat family protein      |           |
| Pc_TC024850 | -2.32 | 0.01  | Down | 1.57  | 0.03      | Up   | 0.07  | 0.97      |      | 0.78  | 0.32  |      | Di-glucose binding protein with Kinesin motor domain         |           |
| Pc_TC024852 | -0.54 | 0.21  |      | -1.16 | 0.04      | Down | -0.2  | 0.82      |      | 0.2   | 0.72  |      | Protein kinase superfamily protein                           |           |
| Pc_TC024854 | 0.92  | 0.01  |      | 0.76  | 0.08      |      | 1.07  | 0.21      |      | 1.02  | 0.05  | Up   | Major facilitator superfamily protein                        |           |
| Pc_TC024857 | 1.91  | 0.01  | Up   | 1.46  | 0.08      |      | 1.63  | 0.16      |      | 1.12  | 0.19  |      | L-fucokinase/GDP-L-fucose pyrophosphorylase                  |           |
| Pc_TC024862 | -1.93 | 0     | Down | 0.77  | 0.17      |      | -0.94 | 0.35      |      | 0.18  | 0.78  |      | alpha/beta-Hydrolases superfamily protein                    |           |
| Pc_TC024867 | -0.52 | 0.49  |      | -0.75 | 0.38      |      | 2.31  | 0.03      | Up   | 1.18  | 0.11  |      | Dihydrodipicolinate reductase,bacterial/plant                |           |
| Pc_TC024868 | -0.12 | 0.75  |      | -1.09 | 0.03      | Down | 1.95  | 0.02      | Up   | 1.24  | 0.02  | Up   | peroxin 11c                                                  |           |
| Pc_TC024869 | -1.15 | 0.01  | Down | -1.27 | 0.02      | Down | 1.8   | 0.04      | Up   | 1.15  | 0.04  | Up   | peroxin 11c                                                  |           |
| Pc_TC024874 | -1.24 | 0.67  |      | 1.64  | 0.28      |      | -0.82 | 0.8       |      | 2.83  | 0.02  | Up   | UDP-galactose transporter 2                                  |           |
| Pc_TC024881 | -0.27 | 0.79  |      | 0.8   | 0.38      |      | 4.15  | 0         | Up   | 2.14  | 0.01  | Up   | Dihydrodipicolinate reductase,bacterial/plant                |           |
| Pc_TC024890 | 0.08  | 1     |      | 1.38  | 0.45      |      | 4.18  | 0         | Up   | 2.58  | 0.05  |      | unknown protein                                              |           |
| Pc_TC024910 | 0.6   | 0.3   |      | 0.65  | 0.34      |      | 1.74  | 0.09      |      | 2.11  | 0     | Up   | sumo conjugation enzyme 1                                    |           |
| Pc_TC024922 | 1.28  | 0.24  |      | 1.91  | 0.08      |      | 0.99  | 0.53      |      | 3.22  | 0     | Up   | ESTs AU078251(R0889)                                         |           |
| Pc_TC024923 | 0.62  | 0.05  |      | 0.24  | 0.55      |      | -0.06 | 0.94      |      | 1.72  | 0     | Up   | tryptophan biosynthesis 1                                    |           |
| Pc_TC024924 | 0.76  | 0.07  |      | 0.89  | 0.09      |      | -0.75 | 0.44      |      | 1.44  | 0.01  | Up   | tryptophan biosynthesis 1                                    |           |
| Pc_TC024930 | 0.52  | 0.55  |      | 2.34  | 0         | Up   | -1.84 | 0.21      |      | -1.48 | 0.18  |      | CBL-interacting protein kinase 9                             |           |
| Pc_TC024933 | -0.26 | 0.76  |      | 0.12  | 0.92      |      | 2.76  | 0.01      | Up   | 1.85  | 0.01  | Up   | Leucine-rich repeat protein kinase family protein            |           |
| Pc_TC024934 | -0.46 | 0.74  |      | 0.31  | 0.84      |      | 2.87  | 0.02      | Up   | 1.71  | 0.07  |      | FASCIKLIN-like arabinogalactan-protein 10                    |           |
| Pc_TC024942 | -0.33 | 0.58  |      | -1.58 | 0.03      | Down | 0.5   | 0.63      |      | -0.07 | 0.93  |      | GPI anchor biosynthetic process                              |           |
| Pc_TC024945 | 1.18  | 0.01  | Up   | 1.14  | 0.04      | Up   | 0.99  | 0.29      |      | 1.64  | 0.01  | Up   | Seven transmembrane MLO family protein                       |           |
| Pc_TC024946 | 1.19  | 0.09  |      | 0.9   | 0.28      |      | 3.09  | 0         | Up   | 1.82  | 0.02  | Up   | glyceraldehyde-3-phosphate dehydrogenase B subunit           |           |
| Pc_TC024947 | -0.43 | 0.17  |      | -0.77 | 0.06      |      | 1.71  | 0.04      | Up   | 0.94  | 0.06  |      | glyceraldehyde-3-phosphate dehydrogenase B subunit           |           |
| Pc_TC024948 | -2.73 | 0.27  |      | 0     | 0.15      |      | 3.37  | 0.01      | Up   | 0.52  | 0.78  |      | Os03g0129400 protein (Fragment)                              |           |
| Pc_TC024969 | 0.77  | 0.21  |      | 1.68  | 0.01      | Up   | 0     | 2.38E-005 |      | -1.76 | 0.04  | Down | unknown protein                                              |           |
| Pc_TC024970 | 0.32  | 0.74  |      | 0.84  | 0.37      |      | 2.35  | 0.04      | Up   | 1.33  | 0.13  |      | chloroplast signal recognition particle component (CAO)      |           |
| Pc_TC024983 | 0.33  | 0.71  |      | 1.58  | 0.06      |      | -4.45 | 0.01      | Down | -1.33 | 0.21  |      | Trimeric LpxA-like enzymes superfamily protein               |           |
| Pc_TC025014 | -0.04 | 0.94  |      | 0.67  | 0.22      |      | -2.36 | 0.02      | Down | -1.53 | 0.02  | Down | CCT motif family protein                                     |           |
| Pc_TC025019 | 0.24  | 0.68  |      | 0.77  | 0.24      |      | -4.05 | 0         | Down | -1.19 | 0.11  |      | Tetratricopeptide repeat (TPR)-like superfamily protein      |           |
| Pc_TC025022 | 0.48  | 0.13  |      | 1.1   | 0.01      | Up   | -4.21 | 1.65E-005 | Down | -3.09 | ##### | Down | beta-amylase 1                                               |           |
| Pc_TC025031 | -1.05 | 0.03  | Down | -1.16 | 0.05      | Down | 1.39  | 0.13      |      | 0.75  | 0.19  |      | heat shock protein 60                                        |           |
| Pc_TC025048 | -1.8  | 0     | Down | -1.71 | 0.02      | Down | -0.08 | 0.94      |      | -1    | 0.15  |      | Putative plant disease resistance polypeptide                |           |
| Pc_TC025071 | 1.54  | 0.05  |      | 2.39  | 0.01      | Up   | 0.24  | 0.89      |      | 0.72  | 0.47  |      | Heavy metal transport/detoxification superfamily protein     |           |
| Pc_TC025080 | 2.17  | 0.11  |      | 2.76  | 0.04      | Up   | 0.09  | 1         |      | 1.8   | 0.24  |      | FAD/NAD(P)-binding oxidoreductase family protein             |           |
| Pc_TC025099 | 0.34  | 0.26  |      | 0.47  | 0.22      |      | -1.49 | 0.08      |      | -1.08 | 0.03  | Down | unknown protein                                              |           |
| Pc_TC025102 | -0.36 | 0.38  |      | -0.02 | 0.98      |      | 1.9   | 0.03      | Up   | 1.11  | 0.04  | Up   | kinase interacting (KIP1-like) family protein                |           |
| Pc_TC025105 | -0.22 | 0.69  |      | 1.71  | 0         | Up   | -2.24 | 0.04      | Down | -2.19 | 0     | Down | CONTAINS InterPro DOMAIN/s: EGF-like (InterPro:IPR006210)    |           |
| Pc_TC025106 | 0.25  | 0.39  |      | 0.61  | 0.1       |      | -3.94 | 1.78E-005 | Down | -2.76 | ##### | Down | CONTAINS InterPro DOMAIN/s: EGF-like (InterPro:IPR006210)    |           |
| Pc_TC025107 | 0.3   | 0.32  |      | 0.76  | 0.05      |      | -4.13 | 1.10E-005 | Down | -2.46 | ##### | Down | CONTAINS InterPro DOMAIN/s: EGF-like (InterPro:IPR006210)    |           |
| Pc_TC025139 | 0.3   | 0.95  |      | 2.52  | 0.04      | Up   | 1.38  | 0.42      |      | 1.56  | 0.25  |      | Protein of unknown function (DUF1997)                        |           |
| Pc_TC025150 | 1.06  | 0.03  | Up   | 1.19  | 0.04      | Up   | -1.41 | 0.18      |      | -0.45 | 0.51  |      | protein kinase 2B                                            |           |
| Pc_TC025153 | 0     | 0.05  |      | -1.26 | 0.5       |      | 3.23  | 0.01      | Up   | 2.03  | 0.05  |      | Homeobox-leucine zipper protein family                       |           |
| Pc_TC025182 | 3.17  | ##### | Up   | 2.57  | 0.01      | Up   | 2.37  | 0.07      |      | 0.25  | 0.89  |      | P-type ATPase of Arabidopsis 2                               |           |
| Pc_TC025188 | 0.49  | 0.25  |      | 0.89  | 0.08      |      | -2.67 | 0.01      | Down | -1.53 | 0.02  | Down | alpha/beta-Hydrolases superfamily protein                    |           |
| Pc_TC025193 | 3.54  | 0.01  | Up   | 3.06  | 0.08      |      | -0.5  | 1         |      | 0.21  | 1     |      | Protein of unknown function (DUF567)                         |           |
| Pc_TC025199 | -0.51 | 0.12  |      | -1.49 | 0         | Down | -0.38 | 0.65      |      | -0.35 | 0.5   |      | proteasome alpha subunit A1                                  |           |
| Pc_TC025200 | 1.05  | 0     | Up   | 1.79  | 5.00E-005 | Up   | 0.24  | 0.78      |      | 1.28  | 0.02  | Up   | proteasome alpha subunit A1                                  |           |
| Pc_TC025203 | -0.28 | 0.85  |      | 0.21  | 0.9       |      | -3.08 | 0.09      |      | -4.54 | 0.01  | Down | Expressed protein                                            |           |
| Pc_TC025204 | 0.77  | 0.07  |      | 1.41  | 0.01      | Up   | -2.97 | 0         | Down | -0.61 | 0.32  |      | jasmonate-zim-domain protein 11                              | Tify      |
| Pc_TC025205 | 0.52  | 0.5   |      | 1.98  | 0.01      | Up   | -1.89 | 0.16      |      | -1.24 | 0.2   |      | TIFY domain/Divergent CCT motif family protein               | Tify      |
| Pc_TC025217 | 0.18  | 0.84  |      | 0.8   | 0.35      |      | 1.99  | 0.07      |      | 1.7   | 0.03  | Up   | related to AP2 6                                             | AP2-EREBP |
| Pc_TC025218 | 3.17  | 0.01  | Up   | 1.76  | 0.29      |      | 3.15  | 0.04      | Up   | 2.63  | 0.05  | Up   | ethylene response factor 110                                 | AP2-EREBP |
| Pc_TC025233 | -0.35 | 0.74  |      | -4.7  | 0.01      | Down | -0.39 | 0.79      |      | -1.96 | 0.09  |      | origin recognition complex second largest subunit 2          |           |
| Pc_TC025239 | 0     | 1     |      | 1.06  | 0.98      |      | 5.5   | 0         | Up   | 4.48  | 0.01  | Up   | Eukaryotic aspartyl protease family protein                  |           |
| Pc_TC025249 | 0.67  | 0.06  |      | 1.08  | 0.02      | Up   | -1.37 | 0.13      |      | -0.13 | 0.81  |      | MATE efflux family protein                                   |           |
| Pc_TC025258 | 0.66  | 0.3   |      | 1.62  | 0.02      | Up   | 1.27  | 0.24      |      | 2.27  | 0     | Up   | Outer arm dynein light chain 1 protein                       |           |

|             |       |       |      |  |       |           |      |       |           |      |       |       |      |                                                                      |           |
|-------------|-------|-------|------|--|-------|-----------|------|-------|-----------|------|-------|-------|------|----------------------------------------------------------------------|-----------|
| Pc_TC025263 | 0.82  | 0.01  |      |  | 0.73  | 0.07      |      | -4.47 | 3.70E-006 | Down | -2.26 | ##### | Down | related to AP2 4                                                     |           |
| Pc_TC025270 | 0.52  | 0.13  |      |  | 0.68  | 0.12      |      | -0.56 | 0.51      |      | -1.08 | 0.05  | Down | Protein phosphatase 2C family protein                                |           |
| Pc_TC025272 | 0.27  | 0.48  |      |  | 0.11  | 0.83      |      | -3.35 | 0         | Down | -2.25 | 0     | Down | myo-inositol-1-phosphate synthase 2                                  |           |
| Pc_TC025273 | 0.32  | 0.38  |      |  | 0.48  | 0.3       |      | -1.17 | 0.19      |      | -1.28 | 0.02  | Down | myo-inositol-1-phosphate synthase 3                                  |           |
| Pc_TC025278 | 0.46  | 0.6   |      |  | -0.33 | 0.78      |      | 2.34  | 0.04      | Up   | 0.78  | 0.39  |      | polyamine oxidase 1                                                  |           |
| Pc_TC025284 | -0.16 | 0.8   |      |  | 1.38  | 0.03      | Up   | -0.2  | 0.85      |      | -0.23 | 0.76  |      | sulfate transporter 2;1                                              |           |
| Pc_TC025286 | -1.44 | 0.03  | Down |  | -2.2  | 0.01      | Down | 0.3   | 0.78      |      | -1.47 | 0.06  |      | sulfate transporter 1;2                                              |           |
| Pc_TC025293 | -0.8  | 0.11  |      |  | -1.69 | 0.01      | Down | 0.82  | 0.39      |      | 0.03  | 0.97  |      | Undecaprenyl pyrophosphate synthetase family protein                 |           |
| Pc_TC025294 | -0.72 | 0.07  |      |  | -1.75 | 0         | Down | 0.93  | 0.28      |      | 0.35  | 0.52  |      | Undecaprenyl pyrophosphate synthetase family protein                 |           |
| Pc_TC025296 | -2.33 | 0     | Down |  | -6.05 | 1.05E-007 | Down | -0.11 | 0.93      |      | -0.72 | 0.33  |      | polyol/monosaccharide transporter 5                                  |           |
| Pc_TC025297 | -0.23 | 0.64  |      |  | -2.84 | 3.69E-005 | Down | -0.05 | 0.96      |      | -1.18 | 0.07  |      | RmlC-like cupins superfamily protein                                 |           |
| Pc_TC025304 | 0.21  | 0.64  |      |  | 0.37  | 0.49      |      | -2.13 | 0.04      | Down | 0.03  | 0.97  |      | homeobox protein 40                                                  | HB        |
| Pc_TC025319 | -0.3  | 0.77  |      |  | -2.85 | 0.03      | Down | -0.94 | 0.49      |      | -0.33 | 0.77  |      | DHBP synthase RibB-like alpha/beta domain                            |           |
| Pc_TC025326 | 0.36  | 0.34  |      |  | 1.02  | 0.03      | Up   | -1.76 | 0.06      |      | -0.99 | 0.08  |      | calcium ATPase 2                                                     |           |
| Pc_TC025333 | 0.43  | 0.46  |      |  | 0.44  | 0.53      |      | 1.81  | 0.08      |      | 1.51  | 0.03  | Up   | Phototropic-responsive NPH3 family protein                           |           |
| Pc_TC025341 | -0.25 | 0.67  |      |  | 0.42  | 0.52      |      | -0.94 | 0.38      |      | -1.96 | 0.01  | Down | Erv1/Alr family protein                                              |           |
| Pc_TC025343 | -0.35 | 0.5   |      |  | -0.65 | 0.3       |      | 2.03  | 0.03      | Up   | 1.47  | 0.02  | Up   | Phototropic-responsive NPH3 family protein                           | TRAF      |
| Pc_TC025344 | -0.6  | 0.42  |      |  | -1.01 | 0.25      |      | 1.93  | 0.07      |      | 1.48  | 0.04  | Up   | Phototropic-responsive NPH3 family protein                           |           |
| Pc_TC025353 | -0.42 | 0.3   |      |  | -0.64 | 0.21      |      | 1.76  | 0.04      | Up   | 0.79  | 0.14  |      | methionyl-tRNA synthetase / methionine-tRNA ligase / MetRS (cpMetRS) |           |
| Pc_TC025354 | 2.19  | 0.05  |      |  | 2.12  | 0.1       |      | 3.11  | 0.03      | Up   | 2.43  | 0.04  | Up   | Rho GTPase activation protein (RhoGAP) with PH domain                |           |
| Pc_TC025355 | 1.66  | 0.72  |      |  | 3.96  | 0.05      | Up   | 2.09  | 0.56      |      | -0.37 | 1     |      | Uncharacterized protein                                              |           |
| Pc_TC025359 | 0.12  | 0.79  |      |  | -0.02 | 0.98      |      | 1.41  | 0.13      |      | 1.14  | 0.05  | Up   | unknown protein                                                      |           |
| Pc_TC025374 | 0.35  | 0.23  |      |  | 0.37  | 0.31      |      | -1.84 | 0.03      | Down | -1.03 | 0.04  | Down | ABI five binding protein 2                                           |           |
| Pc_TC025385 | -1.13 | 0.1   |      |  | -1.12 | 0.17      |      | 2.13  | 0.04      | Up   | 1.06  | 0.14  |      | pentatricopeptide (PPR) repeat-containing protein                    |           |
| Pc_TC025403 | -0.33 | 0.34  |      |  | -1    | 0.03      | Down | 1.56  | 0.07      |      | 0.87  | 0.09  |      | ribosomal protein L15                                                |           |
| Pc_TC025404 | 2.23  | 0     | Up   |  | 3.66  | 3.69E-007 | Up   | 1.13  | 0.34      |      | 1.7   | 0.04  | Up   | Homocysteine S-methyltransferase family protein                      |           |
| Pc_TC025406 | -1.09 | 0.55  |      |  | -0.11 | 1         |      | 2.66  | 0.05      | Up   | 1.74  | 0.12  |      | O-Glycosyl hydrolases family 17 protein                              |           |
| Pc_TC025412 | 2.4   | 0.19  |      |  | 3.7   | 0.02      | Up   | 0     | 0.53      |      | 0     | 0.54  |      | MA3 domain-containing protein                                        |           |
| Pc_TC025430 | 0.46  | 0.36  |      |  | 1.18  | 0.04      | Up   | -0.36 | 0.72      |      | 0.35  | 0.59  |      | Protein kinase superfamily protein                                   |           |
| Pc_TC025432 | -0.75 | 0.06  |      |  | -1.09 | 0.03      | Down | 2.15  | 0.01      | Up   | 1.11  | 0.04  | Up   | Cation efflux family protein                                         |           |
| Pc_TC025437 | 0.41  | 0.42  |      |  | 0.03  | 0.97      |      | 0.08  | 0.94      |      | 1.8   | 0     | Up   | Cytochrome P450 superfamily protein                                  |           |
| Pc_TC025441 | -2.15 | 0.02  | Down |  | -1.1  | 0.25      |      | -1.8  | 0.17      |      | -1.07 | 0.25  |      | Erythronate-4-phosphate dehydrogenase family protein                 |           |
| Pc_TC025443 | -2.05 | 0.01  | Down |  | -1.19 | 0.16      |      | 1.02  | 0.34      |      | 0.63  | 0.39  |      | Leucine-rich receptor-like protein kinase family protein             |           |
| Pc_TC025451 | 1.38  | 0     | Up   |  | 1.01  | 0.05      |      | -1.06 | 0.28      |      | 1.57  | 0.01  | Up   | branched-chain aminotransferase 3                                    |           |
| Pc_TC025453 | 1.18  | 0.03  | Up   |  | 0.62  | 0.35      |      | 0.89  | 0.39      |      | 0.92  | 0.18  |      | FAD/NAD(P)-binding oxidoreductase family protein                     |           |
| Pc_TC025457 | 1.4   | 0.4   |      |  | 2.87  | 0.03      | Up   | 3.41  | 0.03      | Up   | 2.98  | 0.02  | Up   | Integrase-type DNA-binding superfamily protein                       | AP2-EREBP |
| Pc_TC025460 | -0.68 | 0.19  |      |  | -0.44 | 0.48      |      | 2.2   | 0.02      | Up   | 1.09  | 0.07  |      | ARM repeat superfamily protein                                       |           |
| Pc_TC025467 | -1.43 | 0.03  | Down |  | -3.04 | 0         | Down | -0.61 | 0.57      |      | -0.57 | 0.44  |      | peroxidase 2                                                         |           |
| Pc_TC025478 | 1.12  | 0.01  | Up   |  | 1.32  | 0.01      | Up   | 0.01  | 1         |      | 1.33  | 0.02  | Up   | NAD(P)-linked oxidoreductase superfamily protein                     |           |
| Pc_TC025498 | 0.28  | 0.35  |      |  | 0.56  | 0.14      |      | -1.94 | 0.02      | Down | -0.88 | 0.08  |      | Protein kinase superfamily protein                                   |           |
| Pc_TC025501 | 0.65  | 0.28  |      |  | 2.15  | 0         | Up   | -0.66 | 0.56      |      | -1.92 | 0.02  | Down | Senescence/dehydration-associated protein-related                    |           |
| Pc_TC025502 | 0.33  | 0.29  |      |  | 1.1   | 0.01      | Up   | -3.47 | 0         | Down | -2.16 | ##### | Down | Senescence/dehydration-associated protein-related                    |           |
| Pc_TC025506 | 0.05  | 0.88  |      |  | 0.01  | 0.99      |      | -3.5  | 0         | Down | -2.36 | ##### | Down | Expressed protein                                                    |           |
| Pc_TC025508 | 0.66  | 0.1   |      |  | 1.03  | 0.04      | Up   | -1.12 | 0.24      |      | 0.02  | 0.98  |      | actin depolymerizing factor 5                                        |           |
| Pc_TC025510 | 1.39  | 0     | Up   |  | 2.07  | 0         | Up   | -1.01 | 0.34      |      | 1.45  | 0.02  | Up   | actin depolymerizing factor 5                                        |           |
| Pc_TC025515 | 1.43  | 0     | Up   |  | 0.46  | 0.46      |      | 1.17  | 0.23      |      | 1.71  | 0.01  | Up   | acyl-CoA binding protein 2                                           |           |
| Pc_TC025523 | 0.87  | 0.16  |      |  | 0.2   | 0.81      |      | 2.19  | 0.04      | Up   | 1.71  | 0.02  | Up   | DnaI/Hsp40 cysteine-rich domain superfamily protein                  |           |
| Pc_TC025526 | 1.49  | 0.44  |      |  | 2.17  | 0.21      |      | 3.59  | 0.03      | Up   | 2.04  | 0.22  |      | like AUXIN RESISTANT 2                                               |           |
| Pc_TC025535 | 0.87  | 0.2   |      |  | 1.73  | 0.02      | Up   | -2.52 | 0.06      |      | -1.52 | 0.1   |      | ACT domain repeat 7                                                  |           |
| Pc_TC025536 | 0.54  | 0.26  |      |  | 1.42  | 0.01      | Up   | -2.65 | 0.02      | Down | -1.5  | 0.03  | Down | ACT domain repeat 8                                                  |           |
| Pc_TC025544 | 0.32  | 0.56  |      |  | 0.84  | 0.18      |      | -2.41 | 0.03      | Down | -1.53 | 0.04  | Down | unknown protein                                                      |           |
| Pc_TC025545 | 0.55  | 0.21  |      |  | 1.05  | 0.05      | Up   | -2.01 | 0.05      | Down | -1.41 | 0.03  | Down | unknown protein                                                      |           |
| Pc_TC025547 | 0.48  | 0.1   |      |  | 0.66  | 0.07      |      | -4.82 | 4.61E-007 | Down | -2.74 | ##### | Down | Calcium-binding EF-hand family protein                               |           |
| Pc_TC025548 | 0.18  | 0.67  |      |  | 0.71  | 0.15      |      | -5.41 | 3.82E-006 | Down | -1.65 | 0.01  | Down | Calcium-binding EF-hand family protein                               |           |
| Pc_TC025549 | 0.36  | 0.23  |      |  | 0.35  | 0.36      |      | -4.42 | 3.33E-006 | Down | -2.58 | ##### | Down | Calcium-binding EF-hand family protein                               |           |
| Pc_TC025552 | -1.7  | 0.05  |      |  | -2.36 | 0.03      | Down | 1.6   | 0.15      |      | -0.03 | 1     |      | nuclear factor Y, subunit C4                                         | CCAAT     |
| Pc_TC025564 | -3.07 | ##### | Down |  | -3.56 | 3.80E-005 | Down | 1.41  | 0.16      |      | -0.79 | 0.27  |      | Tryptophan/tyrosine permease                                         |           |
| Pc_TC025581 | 0.62  | 0.34  |      |  | 1.44  | 0.04      | Up   | -3.73 | 0.01      | Down | -3.43 | 0     | Down | Concanavalin A-like lectin protein kinase family protein             |           |
| Pc_TC025582 | 0.65  | 0.07  |      |  | 0.99  | 0.03      |      | -3.12 | 0         | Down | -2.09 | 0     | Down | carboxyesterase 17                                                   |           |
| Pc_TC025611 | 2.53  | 0     | Up   |  | 1.18  | 0.21      |      | -0.27 | 0.87      |      | 2     | 0.02  | Up   | anthranilate synthase 2                                              |           |
| Pc_TC025619 | 0.61  | 0.06  |      |  | 0.07  | 0.87      |      | 0.82  | 0.33      |      | 1.06  | 0.04  | Up   | maternal effect embryo arrest 59                                     |           |
| Pc_TC025621 | 3.7   | ##### | Up   |  | 3.46  | 0         | Up   | 3.87  | 0         | Up   | 4.23  | ##### | Up   | maternal effect embryo arrest 59                                     |           |

|             |       |       |      |  |       |           |      |       |           |      |       |       |      |                                                                                          |     |
|-------------|-------|-------|------|--|-------|-----------|------|-------|-----------|------|-------|-------|------|------------------------------------------------------------------------------------------|-----|
| Pc_TC025625 | 0.39  | 0.39  |      |  | 1.82  | 0         | Up   | -1.44 | 0.15      |      | -1.33 | 0.04  | Down | heat shock protein 17.4                                                                  |     |
| Pc_TC025627 | 0.49  | 0.38  |      |  | 1.67  | 0.01      | Up   | -2.37 | 0.04      | Down | -1.43 | 0.06  |      | heat shock protein 18.2                                                                  |     |
| Pc_TC025628 | 0.08  | 0.93  |      |  | 1.2   | 0.1       |      | -3.3  | 0.01      | Down | -2.6  | 0.01  | Down | heat shock protein 18.2                                                                  |     |
| Pc_TC025629 | -0.38 | 0.33  |      |  | -0.81 | 0.11      |      | 2.04  | 0.02      | Up   | 1.09  | 0.04  | Up   | high cyclic electron flow 1                                                              |     |
| Pc_TC025638 | -0.3  | 0.49  |      |  | -1.69 | 0         | Down | -1.99 | 0.05      | Down | -2.21 | 0     | Down | myosin heavy chain-related                                                               |     |
| Pc_TC025649 | -1.6  | 0.03  | Down |  | 0.34  | 0.65      |      | 1.04  | 0.33      |      | -0.65 | 0.41  |      | Glucose-1-phosphate adenylyltransferase family protein                                   |     |
| Pc_TC025651 | 1.46  | 0.02  | Up   |  | 1.51  | 0.04      | Up   | 1.54  | 0.16      |      | 0.54  | 0.5   |      | Glucose-1-phosphate adenylyltransferase family protein                                   |     |
| Pc_TC025652 | 0.43  | 0.19  |      |  | 0.68  | 0.1       |      | -4.77 | 2.20E-006 | Down | -2.29 | ##### | Down | highly ABA-induced PP2C gene 2                                                           |     |
| Pc_TC025653 | 0.4   | 0.23  |      |  | 0.66  | 0.11      |      | -7.55 | 9.21E-011 | Down | -3.04 | ##### | Down | highly ABA-induced PP2C gene 2                                                           |     |
| Pc_TC025670 | 0.56  | 0.69  |      |  | 2.64  | 0.01      | Up   | -1.01 | 0.61      |      | 0.39  | 0.82  |      | Eukaryotic aspartyl protease family protein                                              |     |
| Pc_TC025672 | 0.32  | 0.27  |      |  | 0.54  | 0.14      |      | -2.32 | 0.01      | Down | -1    | 0.04  |      | Haloacid dehalogenase-like hydrolase (HAD) superfamily protein                           |     |
| Pc_TC025683 | 0.77  | 0.02  |      |  | 1.29  | 0         | Up   | 0.01  | 0.99      |      | 0.73  | 0.16  |      | heat shock cognate protein 70-1                                                          |     |
| Pc_TC025685 | 1.08  | 0.25  |      |  | 1.92  | 0.04      | Up   | -0.25 | 0.9       |      | -0.57 | 0.68  |      | heat shock cognate protein 70-1                                                          |     |
| Pc_TC025688 | 0.39  | 0.21  |      |  | 0.02  | 0.96      |      | 0.16  | 0.85      |      | 1.07  | 0.03  | Up   | HSP20-like chaperones superfamily protein                                                |     |
| Pc_TC025693 | 0.12  | 0.8   |      |  | 0.55  | 0.31      |      | 0.52  | 0.58      |      | -1.39 | 0.03  | Down | UDP-XYL synthase 5                                                                       |     |
| Pc_TC025695 | -0.84 | 0.08  |      |  | 0.55  | 0.31      |      | -0.04 | 0.97      |      | -1.9  | 0     | Down | UDP-XYL synthase 6                                                                       |     |
| Pc_TC025697 | -1.12 | 0.04  | Down |  | -0.6  | 0.35      |      | -0.92 | 0.37      |      | -0.85 | 0.21  |      | RNA-binding (RRM/RBD/RNP motifs) family protein                                          |     |
| Pc_TC025723 | 2.08  | 0.3   |      |  | 3.81  | 0.01      | Up   | 2.2   | 0.34      |      | 1.8   | 0.42  |      | Putative uncharacterized protein                                                         |     |
| Pc_TC025742 | 0.08  | 1     |      |  | 1.23  | 0.53      |      | 3.39  | 0.03      | Up   | 2.48  | 0.07  |      | Expressed protein                                                                        |     |
| Pc_TC025744 | 0.61  | 0.14  |      |  | 0.78  | 0.13      |      | -3.72 | 0         | Down | -1.41 | 0.02  | Down | Low temperature and salt responsive protein family                                       |     |
| Pc_TC025761 | 0.36  | 0.59  |      |  | 1.92  | 0         | Up   | -0.83 | 0.48      |      | 0.22  | 0.79  |      | Plant protein of unknown function (DUF828)                                               |     |
| Pc_TC025762 | 0.82  | 0.02  |      |  | 1.53  | 0         | Up   | -1.13 | 0.2       |      | 0.35  | 0.5   |      | asparagine synthetase 2                                                                  |     |
| Pc_TC025763 | 2.59  | ##### | Up   |  | 3.08  | 2.20E-007 | Up   | 0.39  | 0.72      |      | 1.94  | 0     | Up   | asparagine synthetase 2                                                                  |     |
| Pc_TC025771 | 0.55  | 0.13  |      |  | 0.4   | 0.4       |      | -2.47 | 0.01      | Down | -1.17 | 0.04  | Down | DNAJ heat shock N-terminal domain-containing protein                                     |     |
| Pc_TC025785 | 0.58  | 0.06  |      |  | 1.05  | 0.01      | Up   | -8.03 | 3.54E-012 | Down | -3.61 | ##### | Down | Os03g0300700 protein                                                                     |     |
| Pc_TC025794 | 0.86  | 0.15  |      |  | 1.96  | 0         | Up   | -2.11 | 0.07      |      | -0.78 | 0.32  |      | Protein of unknown function,DUF538                                                       |     |
| Pc_TC025818 | 0.48  | 0.49  |      |  | 0.97  | 0.2       |      | -2.29 | 0.08      |      | -1.87 | 0.04  | Down | Expressed protein                                                                        |     |
| Pc_TC025826 | -0.98 | 0.09  |      |  | -1.26 | 0.07      |      | 2.09  | 0.03      | Up   | 1.07  | 0.1   |      | acyl-activating enzyme 7                                                                 |     |
| Pc_TC025830 | 0.72  | 0.4   |      |  | 1.14  | 0.22      |      | 3.23  | 0.01      | Up   | 1.84  | 0.03  | Up   | Adenine nucleotide alpha hydrolases-like superfamily protein                             |     |
| Pc_TC025831 | 0.61  | 0.27  |      |  | 1.76  | 0         | Up   | -7.74 | 4.22E-006 | Down | -1.76 | 0.02  | Down | Mitochondrial import inner membrane translocase subunit Tim17/Tim22/Tim23 family protein |     |
| Pc_TC025874 | 1.3   | 0.03  | Up   |  | 1.06  | 0.98      |      | 1.06  | 0.33      |      | 2.1   | 0     | Up   | NFU domain protein 1                                                                     |     |
| Pc_TC025876 | 0.49  | 0.09  |      |  | 0.59  | 0.12      |      | -4.34 | 3.92E-006 | Down | -3.01 | ##### | Down | galactinol synthase 1                                                                    |     |
| Pc_TC025878 | -1.04 | 0.01  | Down |  | -0.95 | 0.05      |      | -0.03 | 0.98      |      | -0.55 | 0.3   |      | evolutionarily conserved C-terminal region 7                                             |     |
| Pc_TC025883 | -1.04 | 0     | Down |  | -1.25 | 0         | Down | -0.67 | 0.43      |      | -0.53 | 0.3   |      | glucose-6-phosphate dehydrogenase 4                                                      |     |
| Pc_TC025884 | 1.56  | ##### | Up   |  | 0.85  | 0.05      |      | 1.6   | 0.06      |      | 1.76  | 0     | Up   | glucose-6-phosphate dehydrogenase 4                                                      |     |
| Pc_TC025890 | 0.36  | 0.79  |      |  | 3.06  | 0         | Up   | 1.65  | 0.21      |      | 1.52  | 0.13  |      | Ca2+regulated serine-threonine protein kinase family protein                             |     |
| Pc_TC025898 | 2.57  | 0.01  | Up   |  | 2.7   | 0.01      | Up   | 0.2   | 0.97      |      | 2.12  | 0.06  |      | alpha-L-arabinofuranosidase 1                                                            |     |
| Pc_TC025899 | -1.09 | 0.18  |      |  | -1.61 | 0.09      |      | -2.67 | 0.05      | Down | -1.09 | 0.23  |      | alpha-L-arabinofuranosidase 1                                                            |     |
| Pc_TC025900 | -0.55 | 0.33  |      |  | -0.65 | 0.34      |      | 3.14  | 0         | Up   | 1.91  | 0     | Up   | Leucine-rich repeat protein kinase family protein                                        |     |
| Pc_TC025910 | -1.14 | 0     | Down |  | -1.98 | 8.83E-006 | Down | 1.75  | 0.04      | Up   | 0.38  | 0.44  |      | magnesium-chelatase subunit chlH,chloroplast,putative                                    |     |
| Pc_TC025922 | 0.79  | 0.01  |      |  | 1.1   | 0         | Up   | -2.21 | 0.01      | Down | -0.38 | 0.44  |      | Arabidopsis NAC domain containing protein 87                                             | NAC |
| Pc_TC025923 | 0.29  | 0.31  |      |  | 0.89  | 0.02      |      | -1.82 | 0.03      | Down | -1.03 | 0.04  | Down | hydroxyproline-rich glycoprotein family protein                                          |     |
| Pc_TC025924 | 1.13  | 0.02  | Up   |  | 2.66  | 1.49E-006 | Up   | -1.75 | 0.11      |      | -0.93 | 0.19  |      | hydroxyproline-rich glycoprotein family protein                                          |     |
| Pc_TC025925 | 1.03  | 0     | Up   |  | 1.16  | 0.01      | Up   | -2.09 | 0.02      | Down | -0.38 | 0.47  |      | NAC domain containing protein 47                                                         | NAC |
| Pc_TC025939 | 0.75  | 0.05  |      |  | 1.01  | 0.03      | Up   | -3.26 | 0         | Down | -1.49 | 0.01  | Down | calmodulin like 43                                                                       |     |
| Pc_TC025964 | -1.28 | 0.04  | Down |  | -0.05 | 0.95      |      | 2.52  | 0.01      | Up   | 1.5   | 0.02  | Up   | Leucine-rich repeat protein kinase family protein                                        |     |
| Pc_TC025965 | -0.01 | 1     |      |  | -1.26 | 0.19      |      | 2.31  | 0.03      | Up   | 1.68  | 0.03  | Up   | Pentatricopeptide repeat (PPR) superfamily protein                                       |     |
| Pc_TC025989 | -1.52 | 0.01  | Down |  | -0.25 | 0.71      |      | 0.32  | 0.75      |      | -0.81 | 0.25  |      | CBL-interacting protein kinase 20                                                        |     |
| Pc_TC025991 | 0.85  | 0.19  |      |  | -1.9  | 0.05      | Down | -0.64 | 0.59      |      | -0.97 | 0.26  |      | CBL-interacting protein kinase 20                                                        |     |
| Pc_TC026010 | -1.56 | 0.01  | Down |  | -0.12 | 0.86      |      | -0.43 | 0.68      |      | -0.68 | 0.34  |      | AAA-type ATPase family protein                                                           |     |
| Pc_TC026016 | 0.08  | 0.95  |      |  | -0.74 | 0.43      |      | 1.51  | 0.18      |      | 1.71  | 0.02  | Up   | Heavy metal transport/detoxification superfamily protein                                 |     |
| Pc_TC026023 | 0     | ##### |      |  | -4.38 | 5.86E-005 | Down | -0.24 | 0.84      |      | -1.86 | 0.03  | Down | terpene synthase 21                                                                      |     |
| Pc_TC026033 | 0.13  | 0.85  |      |  | -2.2  | 0.01      | Down | -0.3  | 0.79      |      | -0.5  | 0.5   |      | SAC3/GANP/Nin1/mts3/elf-3 p25 family                                                     |     |
| Pc_TC026035 | 2.31  | 0.01  | Up   |  | 2.44  | 0.02      | Up   | 0.35  | 0.87      |      | 0     | 1     |      | SAC3/GANP/Nin1/mts3/elf-3 p25 family                                                     |     |
| Pc_TC026044 | 0.22  | 0.52  |      |  | -1    | 0.03      | Down | 0.54  | 0.53      |      | 0.96  | 0.06  |      | NAD(P)-binding Rossmann-fold superfamily protein                                         |     |
| Pc_TC026060 | 3.59  | 0     | Up   |  | 4.2   | 6.48E-005 | Up   | 1.94  | 0.25      |      | 3.59  | 0     | Up   | D-aminoacid aminotransferase-like PLP-dependent enzymes superfamily protein              |     |
| Pc_TC026071 | -0.58 | 0.12  |      |  | -0.69 | 0.15      |      | 1.71  | 0.05      | Up   | 0.76  | 0.14  |      | Major facilitator superfamily protein                                                    |     |
| Pc_TC026089 | 1.18  | 0     | Up   |  | -0.38 | 0.49      |      | -0.44 | 0.64      |      | -0.41 | 0.49  |      | Peptidase C15,pyroglutamyl peptidase I-like                                              |     |
| Pc_TC026101 | 0.48  | 0.2   |      |  | 0.71  | 0.13      |      | -5.04 | 5.19E-006 | Down | -1.58 | 0.01  | Down | O-Glycosyl hydrolases family 17 protein                                                  |     |
| Pc_TC026123 | 0.47  | 0.72  |      |  | 2.4   | 0.01      | Up   | -0.39 | 0.85      |      | -1.49 | 0.32  |      | Uncharacterized protein                                                                  |     |
| Pc_TC026130 | 0.14  | 0.7   |      |  | 0.14  | 0.77      |      | -1.96 | 0.04      | Down | -1.65 | 0     | Down | Transducin/WD40 repeat-like superfamily protein                                          |     |
| Pc_TC026131 | 0.71  | 0.13  |      |  | 1.33  | 0.02      | Up   | -2.5  | 0.02      | Down | -1.03 | 0.12  |      | Haloacid dehalogenase-like hydrolase (HAD) superfamily protein                           |     |

|             |       |       |      |       |           |      |       |           |      |       |       |      |                                                                                       |     |
|-------------|-------|-------|------|-------|-----------|------|-------|-----------|------|-------|-------|------|---------------------------------------------------------------------------------------|-----|
| Pc_TC026138 | 3.6   | ##### | Up   | 0.75  | 0.5       |      | 3.42  | 0         | Up   | 0.31  | 0.81  |      | dentin sialophosphoprotein-related                                                    |     |
| Pc_TC026150 | 0.41  | 0.2   |      | 0.15  | 0.72      |      | 0.81  | 0.33      |      | 1.02  | 0.04  | Up   | Class-II DAHP synthetase family protein                                               |     |
| Pc_TC026160 | 3.4   | 0     | Up   | 1.82  | 0.21      |      | 3.06  | 0.04      | Up   | 2.55  | 0.04  | Up   | GTP-binding protein 1                                                                 |     |
| Pc_TC026167 | -3.21 | 0     | Down | -1.42 | 0.18      |      | 0.59  | 0.63      |      | -1.49 | 0.14  |      | serine carboxypeptidase-like 51                                                       |     |
| Pc_TC026175 | 0.39  | 0.55  |      | 0.62  | 0.4       |      | -3.85 | 0         | Down | -1.83 | 0.03  | Down | O-Glycosyl hydrolases family 17 protein                                               |     |
| Pc_TC026183 | -0.66 | 0.26  |      | -0.71 | 0.31      |      | 2.65  | 0.01      | Up   | 1.26  | 0.05  |      | sucrose synthase 4                                                                    |     |
| Pc_TC026184 | -0.51 | 0.15  |      | -0.74 | 0.1       |      | 2.44  | 0         | Up   | 1.2   | 0.02  | Up   | sucrose synthase 4                                                                    |     |
| Pc_TC026217 | 1.66  | 0.1   |      | 1.78  | 0.11      |      | 3.19  | 0.01      | Up   | 1.63  | 0.14  |      | glucose-6-phosphate dehydrogenase 1                                                   |     |
| Pc_TC026222 | 1.49  | 0.01  | Up   | -0.66 | 0.41      |      | 1.08  | 0.31      |      | 0.23  | 0.77  |      | PLC-like phosphodiesterases superfamily protein                                       |     |
| Pc_TC026223 | 1.07  | 0.04  | Up   | 1.43  | 0.02      | Up   | 0.8   | 0.43      |      | 0.59  | 0.39  |      | PLC-like phosphodiesterases superfamily protein                                       |     |
| Pc_TC026229 | 1.86  | ##### | Up   | 2.5   | 5.40E-006 | Up   | 2.97  | 0         | Up   | 2.65  | ##### | Up   | unknown protein                                                                       |     |
| Pc_TC026239 | -3.73 | 0.05  | Down | -2.75 | 0.13      |      | 0.6   | 0.7       |      | -0.18 | 0.94  |      | lectin protein kinase family protein                                                  |     |
| Pc_TC026250 | 2.12  | 0     | Up   | 0.51  | 0.53      |      | 1.43  | 0.19      |      | 0.49  | 0.56  |      | RAP                                                                                   |     |
| Pc_TC026252 | 0.51  | 0.41  |      | -0.77 | 0.33      |      | 1.93  | 0.06      |      | 2.25  | 0     | Up   | RAP                                                                                   |     |
| Pc_TC026271 | -0.5  | 0.32  |      | -1.82 | 0.01      | Down | 0.77  | 0.42      |      | -1.18 | 0.08  |      | pyruvate orthophosphate dikinase                                                      |     |
| Pc_TC026272 | -1.86 | ##### | Down | -0.08 | 0.87      |      | -0.35 | 0.7       |      | -0.22 | 0.69  |      | pyruvate orthophosphate dikinase                                                      |     |
| Pc_TC026274 | -1.01 | 0.43  |      | -0.12 | 0.98      |      | 2.5   | 0.04      | Up   | 1.35  | 0.17  |      | Peroxidase superfamily protein                                                        |     |
| Pc_TC026278 | 0.6   | 0.25  |      | 1.71  | 0         | Up   | -1.33 | 0.21      |      | -0.34 | 0.63  |      | allene oxide cyclase 3                                                                |     |
| Pc_TC026280 | 0.23  | 0.74  |      | 0.96  | 0.19      |      | -3.04 | 0.02      | Down | -0.5  | 0.55  |      | Putative gag-pol polyprotein                                                          |     |
| Pc_TC026301 | -0.06 | 0.88  |      | -0.5  | 0.35      |      | 1.87  | 0.04      | Up   | 1.14  | 0.04  | Up   | Ribosomal protein S5 family protein                                                   |     |
| Pc_TC026312 | -0.58 | 0.1   |      | -0.93 | 0.05      |      | 1.94  | 0.02      | Up   | 1.01  | 0.05  | Up   | magnesium chelatase i2                                                                |     |
| Pc_TC026313 | -0.96 | 0.03  |      | -1.43 | 0.01      | Down | 1.66  | 0.06      |      | 0.65  | 0.24  |      | magnesium chelatase i2                                                                |     |
| Pc_TC026321 | -1.96 | 0     | Down | 1.16  | 0.06      |      | -1.57 | 0.15      |      | -0.65 | 0.37  |      | tobamovirus multiplication 1                                                          |     |
| Pc_TC026350 | 1.12  | 0.08  |      | 0.08  | 0.94      |      | 2.26  | 0.03      | Up   | 1.11  | 0.14  |      | transferases;folic acid binding                                                       |     |
| Pc_TC026351 | -1.45 | 0.04  | Down | -1.55 | 0.05      |      | 1.73  | 0.09      |      | 0.42  | 0.56  |      | transferases;folic acid binding                                                       |     |
| Pc_TC026364 | -1.26 | 0     | Down | -1.55 | 0         | Down | -1.17 | 0.18      |      | -2.1  | 0     | Down | lysyl-tRNA synthetase 1                                                               |     |
| Pc_TC026365 | 1.24  | 0     | Up   | 1.03  | 0.04      | Up   | 2.61  | 0         | Up   | 2.04  | 0     | Up   | lysyl-tRNA synthetase 1                                                               |     |
| Pc_TC026409 | 0.14  | 0.65  |      | 0.09  | 0.81      |      | -1.74 | 0.04      | Down | -1.41 | 0     | Down | Serine protease inhibitor (SERPIN) family protein                                     |     |
| Pc_TC026411 | 2.25  | 0.02  | Up   | 0.32  | 0.88      |      | 3.56  | 0.01      | Up   | 0.47  | 0.76  |      | NAD(P)-linked oxidoreductase superfamily protein                                      |     |
| Pc_TC026415 | 0.86  | 0.26  |      | 0.25  | 0.81      |      | 0.85  | 0.48      |      | 1.81  | 0.02  | Up   | Primosome PriB/single-strand DNA-binding                                              |     |
| Pc_TC026425 | 0.49  | 0.43  |      | -0.15 | 0.86      |      | 1.55  | 0.14      |      | 1.66  | 0.02  | Up   | 2-oxoglutarate (2OG) and Fe(II)-dependent oxygenase superfamily protein               |     |
| Pc_TC026428 | -0.92 | 0.35  |      | -0.76 | 0.49      |      | 0.95  | 0.44      |      | -2.28 | 0.05  | Down | TCOP-1/cpn60 chaperonin family protein                                                |     |
| Pc_TC026442 | 2.89  | 0.08  |      | -0.94 | 1         |      | 3.31  | 0.08      |      | 3.43  | 0.02  | Up   | NAC domain containing protein 58                                                      | NAC |
| Pc_TC026460 | 1.08  | 0.47  |      | 2.6   | 0.03      | Up   | 2.13  | 0.17      |      | 1.68  | 0.2   |      | Plant protein of unknown function (DUF828) with plant pleckstrin homology-like region |     |
| Pc_TC026488 | 1.66  | 0.23  |      | 2.2   | 0.11      |      | 3.35  | 0.02      | Up   | 2.39  | 0.06  |      | expansin B2                                                                           |     |
| Pc_TC026490 | 0.52  | 0.27  |      | 1.26  | 0.02      | Up   | -6.51 | 1.74E-006 | Down | -3.58 | ##### | Down | nine-cis-epoxycarotenoid dioxygenase 3                                                |     |
| Pc_TC026513 | 1.98  | 0.01  | Up   | 2.64  | 0         | Up   | 1.18  | 0.33      |      | 0.92  | 0.31  |      | zinc finger (C3HC4-type RING finger) protein-related                                  |     |
| Pc_TC026515 | 1.42  | 0.05  | Up   | 0.7   | 0.44      |      | -0.63 | 0.64      |      | 0.37  | 0.7   |      | zinc finger (C3HC4-type RING finger) protein-related                                  |     |
| Pc_TC026532 | 0.35  | 0.42  |      | -0.24 | 0.68      |      | 0.89  | 0.34      |      | 1.16  | 0.04  | Up   | methionine synthase 2                                                                 |     |
| Pc_TC026545 | 1.94  | 0.02  | Up   | 1.48  | 0.14      |      | -1.5  | 0.37      |      | -0.05 | 1     |      | osmotin 34                                                                            |     |
| Pc_TC026548 | -0.95 | 0.26  |      | -1.53 | 0.13      |      | -5.99 | 0         | Down | -2.41 | 0.02  | Down | cupin family protein                                                                  |     |
| Pc_TC026557 | -3.21 | 0     | Down | -1.86 | 0.07      |      | -1.86 | 0.15      |      | -0.67 | 0.46  |      | NPR1-like protein 4                                                                   |     |
| Pc_TC026574 | -0.06 | 0.91  |      | -0.48 | 0.41      |      | -1.2  | 0.22      |      | -1.58 | 0.02  | Down | lipases;hydrolases,acting on ester bonds                                              |     |
| Pc_TC026576 | 0.01  | 0.98  |      | -0.09 | 0.88      |      | -3.15 | 0         | Down | -2.32 | 0     | Down | glycine-rich protein                                                                  |     |
| Pc_TC026624 | -3.28 | 0     | Down | 0.81  | 0.34      |      | -0.07 | 0.97      |      | -1.92 | 0.06  |      | Domain of unknown function (DUF966)                                                   |     |
| Pc_TC026660 | 0.66  | 0.34  |      | 1.08  | 0.16      |      | -2.98 | 0.03      | Down | -0.97 | 0.27  |      | splicing factor Prp18 family protein                                                  |     |
| Pc_TC026661 | 4.4   | 0.01  | Up   | 5.45  | 0         | Up   | 2.96  | 0.28      |      | 0.63  | 1     |      | splicing factor Prp18 family protein                                                  |     |
| Pc_TC026673 | 1.05  | 0     | Up   | 0.3   | 0.54      |      | 1.27  | 0.15      |      | -0.37 | 0.51  |      | leucine-rich repeat transmembrane protein kinase family protein                       |     |
| Pc_TC026675 | 0.14  | 0.82  |      | -0.6  | 0.41      |      | 2.71  | 0.01      | Up   | 1.8   | 0.01  | Up   | Uncharacterized protein                                                               |     |
| Pc_TC026697 | -1.18 | 0.02  | Down | -1.36 | 0.03      | Down | 1.08  | 0.25      |      | 0.44  | 0.47  |      | Ran BP2/NZF zinc finger-like superfamily protein                                      |     |
| Pc_TC026701 | 1.28  | 0.02  | Up   | 1.01  | 0.14      |      | 0.37  | 0.73      |      | 1     | 0.16  |      | plantacyanin                                                                          |     |
| Pc_TC026703 | 1.1   | 0.05  | Up   | 1.83  | 0         | Up   | -4.17 | 0         | Down | -2.9  | 0     | Down | Regulator of Vps4 activity in the MVB pathway protein                                 |     |
| Pc_TC026722 | 0.32  | 0.3   |      | 0.4   | 0.31      |      | -4.12 | 1.23E-005 | Down | -1.75 | 0     | Down | glutamine synthase clone R1                                                           |     |
| Pc_TC026741 | -4.17 | ##### | Down | 0.45  | 0.48      |      | -1.42 | 0.18      |      | -0.25 | 0.72  |      | phytochrome A                                                                         |     |
| Pc_TC026755 | 0.32  | 0.64  |      | 0.91  | 0.22      |      | -3.46 | 0.01      | Down | -1.29 | 0.13  |      | Glycosyl hydrolase family 17 protein                                                  |     |
| Pc_TC026759 | -0.04 | 0.98  |      | 1.09  | 0.13      |      | 0     | 3.05E-005 |      | -5.06 | ##### | Down | unknown protein                                                                       |     |
| Pc_TC026761 | 0.4   | 0.49  |      | 1.38  | 0.03      | Up   | -2.37 | 0.04      | Down | -0.56 | 0.45  |      | Expressed protein                                                                     |     |
| Pc_TC026771 | 1.89  | 0.38  |      | 3.58  | 0.02      | Up   | 0     | 0.53      |      | 0.63  | 0.96  |      | lipases;hydrolases,acting on ester bonds                                              |     |
| Pc_TC026787 | -0.09 | 1     |      | -1.3  | 0.35      |      | 2.64  | 0.03      | Up   | 1.1   | 0.27  |      | Thioredoxin superfamily protein                                                       |     |
| Pc_TC026809 | 1.59  | 0.18  |      | 2.54  | 0.03      | Up   | 0.16  | 1         |      | 2.14  | 0.07  |      | Uncharacterized protein                                                               |     |
| Pc_TC026813 | -0.82 | 0.02  |      | -1.24 | 0.01      | Down | 1.25  | 0.14      |      | 0.13  | 0.8   |      | ADP glucose pyrophosphorylase large subunit 1                                         |     |
| Pc_TC026819 | -0.24 | 0.7   |      | -1.51 | 0.05      | Down | 0.99  | 0.33      |      | 0.1   | 0.89  |      | methyltransferases                                                                    |     |

|             |       |      |      |       |           |      |       |           |      |       |       |      |                                                                                    |      |
|-------------|-------|------|------|-------|-----------|------|-------|-----------|------|-------|-------|------|------------------------------------------------------------------------------------|------|
| Pc_TC026820 | 0.82  | 0.63 |      | 2.17  | 0.09      |      | 2.59  | 0.08      |      | 2.66  | 0.02  | Up   | syntaxin of plants 111                                                             |      |
| Pc_TC026828 | 0.32  | 0.46 |      | 0.28  | 0.61      |      | -2.22 | 0.03      | Down | -0.97 | 0.12  |      | pfkB-like carbohydrate kinase family protein                                       |      |
| Pc_TC026833 | -0.82 | 0.01 |      | -1.51 | 8.75E-005 | Down | 1.59  | 0.07      |      | 0.56  | 0.25  |      | serine transhydroxymethyltransferase 1                                             |      |
| Pc_TC026834 | -0.52 | 0.15 |      | -0.75 | 0.11      |      | 2.52  | 0         | Up   | 1.17  | 0.02  | Up   | serine transhydroxymethyltransferase 1                                             |      |
| Pc_TC026839 | 0.45  | 0.33 |      | 1.68  | 0         | Up   | -2.93 | 0.01      | Down | -0.61 | 0.34  |      | basic helix-loop-helix (bHLH) DNA-binding superfamily protein                      | bHLH |
| Pc_TC026853 | 0.53  | 0.11 |      | 1.1   | 0.01      | Up   | -1.68 | 0.06      |      | -0.57 | 0.27  |      | Aluminium induced protein with YGL and LRDR motifs                                 |      |
| Pc_TC026862 | 0.93  | 0.6  |      | 2.64  | 0.04      | Up   | 0     | 0.19      |      | 0.47  | 0.87  |      | Protein kinase superfamily protein                                                 |      |
| Pc_TC026865 | 0.46  | 0.48 |      | 0.24  | 0.76      |      | -3.06 | 0.02      | Down | -1.99 | 0.02  | Down | Protein of unknown function (DUF1677)                                              |      |
| Pc_TC026880 | -0.97 | 0.12 |      | 0.44  | 0.51      |      | -0.39 | 0.71      |      | -1.51 | 0.05  | Down | Glycosyl hydrolase family protein                                                  |      |
| Pc_TC026882 | -0.53 | 0.24 |      | -1.25 | 0.03      | Down | -1.81 | 0.07      |      | 0.39  | 0.49  |      | Glycosyl hydrolase family protein                                                  |      |
| Pc_TC026883 | 0.16  | 0.77 |      | 1.11  | 0.07      |      | 1.42  | 0.15      |      | -1.63 | 0.03  | Down | Glycosyl hydrolase family protein                                                  |      |
| Pc_TC026884 | 0.74  | 0.1  |      | 0.61  | 0.28      |      | 1.37  | 0.14      |      | 1.16  | 0.05  | Up   | Glycosyl hydrolase family protein                                                  |      |
| Pc_TC026889 | 1.69  | 0    | Up   | 1.94  | 0.01      | Up   | 0     | 6.32E-005 |      | 0.71  | 0.36  |      | Adenine nucleotide alpha hydrolases-like superfamily protein                       |      |
| Pc_TC026890 | 0.55  | 0.45 |      | 0.89  | 0.27      |      | -5.11 | 0         | Down | -0.35 | 0.71  |      | Adenine nucleotide alpha hydrolases-like superfamily protein                       |      |
| Pc_TC026894 | -0.62 | 0.13 |      | -0.85 | 0.11      |      | 1.89  | 0.03      | Up   | 0.97  | 0.08  |      | Ribosomal protein L6 family                                                        |      |
| Pc_TC026932 | 1.36  | 0.1  |      | -0.25 | 0.87      |      | 1.99  | 0.1       |      | 1.89  | 0.03  | Up   | basic helix-loop-helix (bHLH) DNA-binding superfamily protein                      |      |
| Pc_TC026935 | 0.92  | 0.1  |      | 2.83  | 1.86E-006 | Up   | -2.04 | 0.08      |      | -1.06 | 0.17  |      | cytochrome P450, family 81, subfamily D, polypeptide 6                             |      |
| Pc_TC026936 | 0.15  | 0.93 |      | 1.85  | 0.04      | Up   | -1.74 | 0.28      |      | -0.54 | 0.67  |      | cytochrome P450, family 81, subfamily D, polypeptide 3                             |      |
| Pc_TC026938 | 0.22  | 0.63 |      | 0.39  | 0.48      |      | -1.8  | 0.08      |      | -1.68 | 0.01  | Down | Gibberellin-regulated family protein                                               |      |
| Pc_TC026939 | 0.4   | 0.19 |      | 0.78  | 0.05      |      | -1.81 | 0.04      | Down | -1.37 | 0.01  | Down | Protein phosphatase 2C family protein                                              |      |
| Pc_TC026940 | 0.37  | 0.38 |      | 0.42  | 0.42      |      | -2.01 | 0.04      | Down | -1.53 | 0.01  | Down | Protein phosphatase 2C family protein                                              |      |
| Pc_TC026941 | 0.45  | 0.3  |      | 1.01  | 0.05      |      | -2.35 | 0.02      | Down | -1.35 | 0.03  | Down | Protein phosphatase 2C family protein                                              |      |
| Pc_TC026974 | 0.86  | 0.28 |      | 1.9   | 0.02      | Up   | -1.11 | 0.43      |      | 0.44  | 0.65  |      | allene oxide synthase                                                              |      |
| Pc_TC026975 | 0.4   | 0.18 |      | 0.46  | 0.21      |      | -3.02 | 0         | Down | -1.96 | 0     | Down | cold-regulated 413-plasma membrane 2                                               |      |
| Pc_TC026987 | -0.2  | 0.92 |      | 0.29  | 0.84      |      | 2.35  | 0.06      |      | 1.91  | 0.04  | Up   | unknown protein                                                                    |      |
| Pc_TC027004 | 0.07  | 0.89 |      | 0.52  | 0.36      |      | -0.25 | 0.8       |      | 1.45  | 0.01  | Up   | HAD-superfamily hydrolase, subfamily IG, 5'-nucleotidase                           |      |
| Pc_TC027027 | 0.93  | 0.6  |      | 2.69  | 0.03      | Up   | -0.82 | 0.8       |      | 0.47  | 0.87  |      | methyltransferases                                                                 |      |
| Pc_TC027029 | -0.52 | 0.22 |      | -0.97 | 0.08      |      | 1.89  | 0.03      | Up   | 0.87  | 0.12  |      | GTP-binding protein-related                                                        |      |
| Pc_TC027036 | 1.13  | 0.03 | Up   | -1.9  | 0.02      | Down | 0.91  | 0.37      |      | 0.71  | 0.3   |      | phytochrome interacting factor 3                                                   | bHLH |
| Pc_TC027037 | -1.36 | 0.03 | Down | 0.31  | 0.64      |      | -1.2  | 0.26      |      | 0.72  | 0.28  |      | phytochrome interacting factor 3                                                   | bHLH |
| Pc_TC027045 | -0.41 | 0.33 |      | -1.51 | 0.01      | Down | 0.2   | 0.83      |      | -0.27 | 0.64  |      | FAD/NAD(P)-binding oxidoreductase family protein                                   |      |
| Pc_TC027078 | 0.69  | 0.03 |      | 1.34  | 0         | Up   | -3.19 | 0         | Down | -1.49 | 0.01  | Down | O-Glycosyl hydrolases family 17 protein                                            |      |
| Pc_TC027079 | 0.76  | 0.14 |      | 1.03  | 0.1       |      | -3.69 | 0         | Down | -2.01 | 0.01  | Down | O-Glycosyl hydrolases family 17 protein                                            |      |
| Pc_TC027080 | 0.97  | 0.11 |      | 1.75  | 0.01      | Up   | -3.34 | 0.01      | Down | -2.03 | 0.02  | Down | O-Glycosyl hydrolases family 17 protein                                            |      |
| Pc_TC027082 | -0.92 | 0.73 |      | -0.2  | 1         |      | 2.96  | 0.04      | Up   | 1.9   | 0.14  |      | DNase I-like superfamily protein                                                   |      |
| Pc_TC027084 | 1.8   | 0.05 | Up   | 0.88  | 0.46      |      | 1.16  | 0.41      |      | 1.13  | 0.3   |      | Expressed protein                                                                  |      |
| Pc_TC027090 | 2.05  | 0    | Up   | 2.13  | 0         | Up   | 2.9   | 0.01      | Up   | 2.66  | 0     | Up   | glutamate dehydrogenase 1                                                          |      |
| Pc_TC027107 | 1.35  | 0    | Up   | 0.87  | 0.09      |      | 0.04  | 0.97      |      | 2.79  | ##### | Up   | Aldolase-type TIM barrel family protein                                            |      |
| Pc_TC027108 | 1.17  | 0    | Up   | 0.75  | 0.12      |      | 0.02  | 0.98      |      | 2.71  | ##### | Up   | Aldolase-type TIM barrel family protein                                            |      |
| Pc_TC027119 | 1.26  | 0.11 |      | 1.19  | 0.19      |      | 2.76  | 0.02      | Up   | 1.95  | 0.02  | Up   | Protein of unknown function, DUF593                                                |      |
| Pc_TC027132 | 0.41  | 0.26 |      | 0.85  | 0.06      |      | -2.29 | 0.02      | Down | -1.63 | 0     | Down | Protein of unknown function (DUF569)                                               |      |
| Pc_TC027136 | 0.56  | 0.14 |      | 1.04  | 0.03      | Up   | -1.42 | 0.13      |      | -0.72 | 0.21  |      | P-loop containing nucleoside triphosphate hydrolases superfamily protein           |      |
| Pc_TC027143 | 0.39  | 0.4  |      | 0.79  | 0.15      |      | -1.72 | 0.09      |      | -1.28 | 0.05  | Down | Galactosyltransferase family protein                                               |      |
| Pc_TC027145 | -0.06 | 0.89 |      | 0.84  | 0.09      |      | -3.01 | 0         | Down | -2.28 | 0     | Down | Galactosyltransferase family protein                                               |      |
| Pc_TC027154 | -0.28 | 0.48 |      | -1.08 | 0.03      | Down | 1.22  | 0.16      |      | 0.75  | 0.16  |      | acyl-activating enzyme 18                                                          |      |
| Pc_TC027156 | -0.57 | 0.33 |      | -1.59 | 0.03      | Down | 1.25  | 0.21      |      | 0.7   | 0.29  |      | ACD1-like                                                                          |      |
| Pc_TC027162 | -0.25 | 0.64 |      | 0.26  | 0.67      |      | 2.09  | 0.03      | Up   | 1.5   | 0.01  | Up   | Protein of Unknown Function (DUF239)                                               |      |
| Pc_TC027165 | 1.08  | 0.47 |      | 1.06  | 0.52      |      | 2.96  | 0.04      | Up   | 2.29  | 0.06  |      | Cupredoxin superfamily protein                                                     |      |
| Pc_TC027206 | 0.08  | 1    |      | 0.54  | 0.85      |      | 2.96  | 0.05      | Up   | 0.89  | 0.63  |      | Chalcone-flavanone isomerase family protein                                        |      |
| Pc_TC027211 | 0.55  | 0.23 |      | 1.24  | 0.02      | Up   | -5.78 | 6.66E-006 | Down | -3.22 | ##### | Down | C2H2-type zinc finger family protein                                               |      |
| Pc_TC027212 | 0.48  | 0.63 |      | 2.35  | 0.01      | Up   | -4.96 | 0.02      | Down | -2.83 | 0.04  | Down | actin depolymerizing factor 11                                                     |      |
| Pc_TC027228 | -2.88 | 0    | Down | -0.22 | 0.81      |      | 0.98  | 0.37      |      | -0.66 | 0.44  |      | FtsI-like methyltransferase family protein                                         |      |
| Pc_TC027269 | 0.75  | 0.17 |      | 1.48  | 0.02      | Up   | -3.05 | 0.01      | Down | -0.02 | 0.98  |      | Glycosyl hydrolase superfamily protein                                             |      |
| Pc_TC027270 | 1.72  | 0.01 | Up   | 1.59  | 0.03      | Up   | -4.72 | 0         | Down | -0.48 | 0.58  |      | Glycosyl hydrolase superfamily protein                                             |      |
| Pc_TC027271 | -1.12 | 0.14 |      | 0.14  | 0.88      |      | -3.8  | 0.01      | Down | -0.7  | 0.4   |      | Glycosyl hydrolase superfamily protein                                             |      |
| Pc_TC027273 | 1.49  | 0    | Up   | -0.13 | 0.85      |      | 0.5   | 0.62      |      | 1.13  | 0.07  |      | Fumarylacetoacetate (FAA) hydrolase family                                         |      |
| Pc_TC027303 | 1.41  | 0.01 | Up   | 0.37  | 0.58      |      | 0.84  | 0.41      |      | -0.1  | 0.9   |      | RNA-binding (RRM/RBD/RNP motifs) family protein with retrovirus zinc finger-like c | CCHC |
| Pc_TC027310 | 2.08  | 0.54 |      | 2.64  | 0.36      |      | 4.9   | 0.01      | Up   | 0.63  | 1     |      | CONTAINS InterPro DOMAIN/s: Streptomyces cyclase/dehydrase (InterPro:IPR005031)    |      |
| Pc_TC027312 | -3.41 | 0    | Down | 0.68  | 0.4       |      | -0.66 | 0.59      |      | -0.97 | 0.27  |      | lectin protein kinase family protein                                               |      |
| Pc_TC027317 | -0.64 | 0.49 |      | -0.23 | 0.85      |      | -0.22 | 0.88      |      | -5.42 | 0     | Down | phospholipase D delta                                                              |      |
| Pc_TC027327 | 0.23  | 0.48 |      | 0.4   | 0.34      |      | -1.28 | 0.14      |      | -1.05 | 0.04  | Down | Late embryogenesis abundant protein, group 2                                       |      |
| Pc_TC027332 | -0.03 | 1    |      | 0.47  | 0.56      |      | -1.38 | 0.27      |      | -1.89 | 0.04  | Down | unknown protein                                                                    |      |

|             |       |      |      |       |           |      |       |           |      |       |       |      |                                                                   |      |
|-------------|-------|------|------|-------|-----------|------|-------|-----------|------|-------|-------|------|-------------------------------------------------------------------|------|
| Pc_TC027352 | 2.08  | 0.06 |      | 4.34  | 5.02E-006 | Up   | 1.55  | 0.33      |      | 2.88  | 0.01  | Up   | RmlC-like cupins superfamily protein                              |      |
| Pc_TC027417 | 0.27  | 0.44 |      | 0.24  | 0.59      |      | 1.18  | 0.17      |      | 1.2   | 0.02  | Up   | 30S ribosomal protein,putative                                    |      |
| Pc_TC027418 | 0.54  | 0.18 |      | 0.17  | 0.74      |      | 1.01  | 0.26      |      | 1.25  | 0.02  | Up   | 30S ribosomal protein,putative                                    |      |
| Pc_TC027420 | 0.04  | 0.95 |      | -1.44 | 0.03      | Down | 1.55  | 0.11      |      | 1.24  | 0.05  | Up   | PGR5-LIKE A                                                       |      |
| Pc_TC027421 | -0.33 | 0.34 |      | -1.47 | 0         | Down | 1.43  | 0.09      |      | 1     | 0.05  |      | PGR5-LIKE A                                                       |      |
| Pc_TC027427 | -1.34 | 0.03 | Down | -0.43 | 0.54      |      | -0.33 | 0.75      |      | -1.66 | 0.03  | Down | winged-helix DNA-binding transcription factor family protein      |      |
| Pc_TC027447 | -2.03 | 0    | Down | -2.03 | 0         | Down | 1.2   | 0.21      |      | 0.15  | 0.81  |      | fatty acid amide hydrolase                                        |      |
| Pc_TC027453 | 1.08  | 0.65 |      | 0.8   | 0.82      |      | 3.47  | 0.03      | Up   | 1.5   | 0.44  |      | Uncharacterized protein                                           |      |
| Pc_TC027499 | -4.13 | 0    | Down | -4.15 | 0         | Down | -0.46 | 0.73      |      | -1.19 | 0.23  |      | Subtilase family protein                                          |      |
| Pc_TC027511 | 0.1   | 0.91 |      | -0.24 | 0.78      |      | 2.38  | 0.02      | Up   | 1.87  | 0.01  | Up   | Pectin lyase-like superfamily protein                             |      |
| Pc_TC027512 | 0.51  | 0.56 |      | -0.34 | 0.77      |      | 3.02  | 0.01      | Up   | 2.45  | 0     | Up   | Pectin lyase-like superfamily protein                             |      |
| Pc_TC027517 | -2.17 | 0    | Down | -1.42 | 0.08      |      | 0.01  | 1         |      | -1.63 | 0.05  | Down | Putative uncharacterized protein                                  |      |
| Pc_TC027557 | -1.92 | 0.36 |      | -0.94 | 0.67      |      | 2.86  | 0.04      | Up   | 0.95  | 0.49  |      | Helicase protein with RING/U-box domain                           | SNF2 |
| Pc_TC027571 | -1.78 | 0.01 | Down | -1.2  | 0.12      |      | 1.68  | 0.1       |      | -0.16 | 0.83  |      | phosphate transporter 1,3                                         |      |
| Pc_TC027583 | -0.3  | 0.76 |      | -3.07 | 0.02      | Down | -2.17 | 0.13      |      | -1.42 | 0.17  |      | vacuolar protein sorting 41                                       |      |
| Pc_TC027589 | -0.24 | 1    |      | 3.09  | 0.01      | Up   | -2.82 | 0.37      |      | -1.11 | 0.68  |      | General transcription factor 2-related zinc finger protein        |      |
| Pc_TC027598 | 0.91  | 0.14 |      | 2.33  | 0         | Up   | -3.61 | 0.01      | Down | 0.55  | 0.47  |      | Uridine diphosphate glycosyltransferase 74E2                      |      |
| Pc_TC027599 | 0.54  | 0.4  |      | 0.87  | 0.23      |      | -3.65 | 0.01      | Down | -0.45 | 0.58  |      | OSJNBa0035013.13 protein                                          |      |
| Pc_TC027605 | 1.89  | 0.05 |      | 2.78  | 0.01      | Up   | -2.82 | 0.2       |      | 1.47  | 0.19  |      | Protein of unknown function (DUF594)                              |      |
| Pc_TC027606 | 1.81  | 0.01 | Up   | 2.13  | 0.01      | Up   | -1.04 | 0.43      |      | 0.77  | 0.37  |      | Protein of unknown function (DUF594)                              |      |
| Pc_TC027631 | -0.23 | 0.69 |      | 0.31  | 0.64      |      | -1.27 | 0.24      |      | -3.15 | 0     | Down | Eukaryotic aspartyl protease family protein                       |      |
| Pc_TC027638 | 0.3   | 0.54 |      | 1.18  | 0.04      | Up   | 0.36  | 0.71      |      | 0.19  | 0.77  |      | plasma membrane intrinsic protein 2;8                             |      |
| Pc_TC027647 | 0.54  | 0.08 |      | 0.47  | 0.22      |      | -2.7  | 0         | Down | -1.08 | 0.03  | Down | Heavy metal transport/detoxification superfamily protein          |      |
| Pc_TC027669 | 0     | 0.64 |      | 1.38  | 0.65      |      | 3.93  | 0.03      | Up   | 1.43  | 0.58  |      | unknown protein                                                   |      |
| Pc_TC027695 | -1.47 | 0.01 | Down | -1.49 | 0.04      | Down | 0.17  | 0.87      |      | -1.31 | 0.07  |      | phloem protein 2-B12                                              |      |
| Pc_TC027699 | 3.25  | 0.03 | Up   | 4.34  | 0         | Up   | 2.31  | 0.3       |      | 2.71  | 0.12  |      | Uncharacterised protein family (UPF0497)                          |      |
| Pc_TC027711 | -0.88 | 0.34 |      | -2.75 | 0.03      | Down | -0.98 | 0.46      |      | -1.11 | 0.27  |      | NB-ARC domain-containing disease resistance protein               |      |
| Pc_TC027723 | 1.56  | 0.05 |      | 2.87  | 0         | Up   | -2.82 | 0.1       |      | -1.37 | 0.27  |      | basic helix-loop-helix (bHLH) DNA-binding superfamily protein     | bHLH |
| Pc_TC027724 | -1.57 | 0.16 |      | 1.06  | 0.26      |      | -3.56 | 0.04      | Down | -1.7  | 0.15  |      | basic helix-loop-helix (bHLH) DNA-binding superfamily protein     | bHLH |
| Pc_TC027728 | -0.69 | 0.14 |      | -1.63 | 0.01      | Down | -0.22 | 0.82      |      | -0.08 | 0.89  |      | phototropin 2                                                     |      |
| Pc_TC027738 | -4.68 | 0    | Down | -1.7  | 0.16      |      | -0.39 | 0.79      |      | -0.54 | 0.62  |      | Wall-associated kinase family protein                             |      |
| Pc_TC027739 | -2.35 | 0.04 | Down | -1.37 | 0.25      |      | -0.3  | 0.85      |      | -1.54 | 0.17  |      | Wall-associated kinase family protein                             |      |
| Pc_TC027762 | 1.66  | 0.48 |      | 3.38  | 0.04      | Up   | 1.67  | 0.53      |      | 1.21  | 0.69  |      | UDP-glucosyl transferase 85A5                                     |      |
| Pc_TC027774 | 1.21  | 0.01 | Up   | -1.51 | 0.03      | Down | 1.27  | 0.19      |      | 0.93  | 0.14  |      | terpene synthase 1                                                |      |
| Pc_TC027775 | 0.96  | 0.02 |      | -1.11 | 0.05      | Down | 1.35  | 0.13      |      | 0.92  | 0.1   |      | terpene synthase 1                                                |      |
| Pc_TC027776 | 1.02  | 0    | Up   | -1.37 | 0         | Down | 1.35  | 0.11      |      | 0.96  | 0.06  |      | Terpenoid cyclases/Protein prenyltransferases superfamily protein |      |
| Pc_TC027787 | -1.62 | 0.14 |      | -3.06 | 0.03      | Down | 0.26  | 0.86      |      | -0.37 | 0.74  |      | Putative uncharacterized protein                                  |      |
| Pc_TC027801 | -1.84 | 0.02 | Down | -1.3  | 0.13      |      | 1.86  | 0.08      |      | 0.71  | 0.35  |      | fatty acid reductase 1                                            |      |
| Pc_TC027810 | 0.14  | 0.71 |      | 0.84  | 0.06      |      | -2.19 | 0.02      | Down | -1.57 | 0.01  | Down | Oxidoreductase,zinc-binding dehydrogenase family protein          |      |
| Pc_TC027812 | 0.19  | 0.66 |      | -0.45 | 0.43      |      | 0.42  | 0.65      |      | 1.26  | 0.03  | Up   | MATE efflux family protein                                        |      |
| Pc_TC027829 | -3.35 | 0    | Down | -1.67 | 0.11      |      | -0.71 | 0.58      |      | -1.55 | 0.11  |      | unknown protein                                                   |      |
| Pc_TC027842 | -0.54 | 0.51 |      | -0.47 | 0.62      |      | 2.27  | 0.04      | Up   | 1.41  | 0.07  |      | alpha/beta-Hydrolases superfamily protein                         |      |
| Pc_TC027852 | 0.46  | 0.38 |      | 1.38  | 0.02      | Up   | 0.32  | 0.75      |      | 0.74  | 0.25  |      | GORDITA                                                           | MADS |
| Pc_TC027869 | 1.69  | 0    | Up   | 1.83  | 0.01      | Up   | -1.8  | 0.13      |      | -0.77 | 0.34  |      | PLC-like phosphodiesterases superfamily protein                   |      |
| Pc_TC027883 | -2.24 | 0.23 |      | 0.06  | 1         |      | 3.42  | 0.01      | Up   | 1.35  | 0.24  |      | OSJNBb0014D23.12 protein                                          |      |
| Pc_TC027884 | 1.08  | 0.77 |      | 0     | 0.67      |      | 5.86  | 0         | Up   | 4.15  | 0     | Up   | Uncharacterized protein                                           |      |
| Pc_TC027885 | 0.43  | 0.59 |      | 0.87  | 0.31      |      | 1.81  | 0.11      |      | 1.62  | 0.04  | Up   | OSIGBa0113L04.7 protein                                           |      |
| Pc_TC027886 | -0.37 | 0.42 |      | -0.2  | 0.73      |      | 1.74  | 0.06      |      | 1.33  | 0.02  | Up   | Putative uncharacterized protein                                  |      |
| Pc_TC027894 | -2.47 | 0.02 | Down | -0.98 | 0.35      |      | -0.07 | 0.98      |      | 1.28  | 0.12  |      | high affinity K+ transporter 5                                    |      |
| Pc_TC027895 | 1.82  | 0.29 |      | 2.06  | 0.24      |      | 1.62  | 0.46      |      | 3.85  | 0     | Up   | high affinity K+ transporter 5                                    |      |
| Pc_TC027904 | 0.11  | 0.91 |      | 2.11  | 0         | Up   | -3.4  | 0.02      | Down | -2.17 | 0.03  | Down | unknown protein                                                   |      |
| Pc_TC027907 | 0.73  | 0.15 |      | -0.19 | 0.78      |      | -2.37 | 0.03      | Down | 0.23  | 0.74  |      | Protein of unknown function (DUF1624)                             |      |
| Pc_TC027918 | -0.09 | 1    |      | 0.21  | 0.96      |      | 4.05  | 0         | Up   | 2.76  | 0.01  | Up   | Family of unknown function (DUF662)                               |      |
| Pc_TC027919 | -1.73 | 0.06 |      | -1.25 | 0.22      |      | 2.79  | 0.01      | Up   | 1.19  | 0.14  |      | Family of unknown function (DUF662)                               |      |
| Pc_TC027920 | -0.76 | 0.47 |      | -0.34 | 0.79      |      | 3.16  | 0.01      | Up   | 1.86  | 0.03  | Up   | Family of unknown function (DUF662)                               |      |
| Pc_TC027924 | -0.8  | 0.14 |      | -1.94 | 0.01      | Down | 0.98  | 0.31      |      | 0.06  | 0.93  |      | unknown protein                                                   |      |
| Pc_TC027932 | -0.15 | 0.84 |      | 0.76  | 0.31      |      | -3.12 | 0.02      | Down | -3.78 | 0     | Down | Glycosyl hydrolase superfamily protein                            |      |
| Pc_TC027942 | 0.58  | 0.42 |      | 1.47  | 0.05      |      | -3    | 0.03      | Down | -2.73 | 0.01  | Down | F-box family protein                                              |      |
| Pc_TC027943 | 0.38  | 0.27 |      | -0.12 | 0.79      |      | 2.31  | 0.01      | Up   | 1.62  | 0     | Up   | photosystem I subunit O                                           |      |
| Pc_TC027961 | 3.38  | 0    | Up   | 3.45  | 0         | Up   | 1.78  | 0.27      |      | 2.53  | 0.03  | Up   | Putative uncharacterized protein                                  |      |
| Pc_TC027969 | -0.53 | 0.18 |      | -0.87 | 0.08      |      | 1.74  | 0.04      | Up   | 0.81  | 0.13  |      | Plastid-lipid associated protein PAP / fibrillin family protein   |      |
| Pc_TC027971 | 0.16  | 0.73 |      | 0.81  | 0.13      |      | -5.68 | 5.16E-006 | Down | -3.08 | ##### | Down | nodulin MtN21 /EamA-like transporter family protein               |      |



|             |       |      |      |       |      |      |  |       |           |      |       |       |      |                                                                          |            |
|-------------|-------|------|------|-------|------|------|--|-------|-----------|------|-------|-------|------|--------------------------------------------------------------------------|------------|
| Pc_TC027972 | 1.49  | 0.01 | Up   | 1.09  | 0.13 |      |  | -5.08 | 0         | Down | -2.64 | 0     | Down | nodulin MtN21 /EamA-like transporter family protein                      |            |
| Pc_TC028007 | 1.37  | 0.03 | Up   | 0.81  | 0.31 |      |  | -1    | 0.41      |      | -0.06 | 0.96  |      | Etoposide-induced 2.4 (InterPro:IPR009890)                               |            |
| Pc_TC028017 | 0.43  | 0.19 |      | 0.3   | 0.48 |      |  | -1.4  | 0.11      |      | -1.59 | 0     | Down | Glutathione S-transferase family protein                                 |            |
| Pc_TC028018 | -0.29 | 0.58 |      | 0.76  | 0.2  |      |  | -2.39 | 0.03      | Down | 0.33  | 0.61  |      | Glutathione S-transferase family protein                                 |            |
| Pc_TC028033 | 1.61  | 0.13 |      | 3.1   | 0    | Up   |  | 0.66  | 0.72      |      | 2.01  | 0.07  |      | CRINKLY4 related 4                                                       |            |
| Pc_TC028044 | -1.13 | 0    | Down | -1.25 | 0.01 | Down |  | 0.59  | 0.5       |      | -0.46 | 0.4   |      | ferric reduction oxidase 7                                               |            |
| Pc_TC028050 | -0.21 | 0.61 |      | -0.47 | 0.36 |      |  | 1.82  | 0.04      | Up   | 1.17  | 0.03  | Up   | 3-ketoacyl-acyl carrier protein synthase I                               |            |
| Pc_TC028061 | 3.78  | 0.05 | Up   | 3.87  | 0.06 |      |  | 2.96  | 0.28      |      | 3.8   | 0.05  |      | glutamate decarboxylase 3                                                |            |
| Pc_TC028063 | -0.53 | 0.29 |      | -1.3  | 0.04 | Down |  | 0.94  | 0.32      |      | 0.58  | 0.35  |      | NAD(P)-linked oxidoreductase superfamily protein                         |            |
| Pc_TC028100 | -0.43 | 0.3  |      | -1.24 | 0.02 | Down |  | 2.28  | 0.01      | Up   | 1.08  | 0.05  | Up   | light harvesting complex photosystem II subunit 6                        |            |
| Pc_TC028103 | 0.2   | 0.74 |      | 0.17  | 0.81 |      |  | 1.19  | 0.24      |      | 1.57  | 0.02  | Up   | somatic embryogenesis receptor-like kinase 2                             |            |
| Pc_TC028104 | 0.46  | 0.26 |      | 0.35  | 0.5  |      |  | 0.04  | 0.97      |      | 1.13  | 0.04  | Up   | Galactose mutarotase-like superfamily protein                            |            |
| Pc_TC028105 | 3.89  | 0.04 | Up   | 2.64  | 0.36 |      |  | 1.5   | 0.78      |      | 2.8   | 0.26  |      | Galactose mutarotase-like superfamily protein                            |            |
| Pc_TC028107 | -0.57 | 0.35 |      | 0.23  | 0.74 |      |  | 2.01  | 0.04      | Up   | 1.16  | 0.08  |      | ATP binding cassette subfamily B19                                       |            |
| Pc_TC028108 | -0.38 | 0.52 |      | 0.43  | 0.52 |      |  | 2.03  | 0.04      | Up   | 1.39  | 0.03  | Up   | ATP binding cassette subfamily B19                                       |            |
| Pc_TC028109 | -0.8  | 0.02 |      | -1.41 | 0    | Down |  | 2.07  | 0.02      | Up   | 1     | 0.05  | Up   | glyceraldehyde 3-phosphate dehydrogenase A subunit 2                     |            |
| Pc_TC028110 | -0.81 | 0.03 | Up   | -1.56 | 0    | Down |  | 2.11  | 0.01      | Up   | 0.94  | 0.07  |      | glyceraldehyde 3-phosphate dehydrogenase A subunit 2                     |            |
| Pc_TC028115 | 0.49  | 0.27 |      | 1.06  | 0.05 | Up   |  | -2.35 | 0.02      | Down | -1.13 | 0.08  |      | Transmembrane amino acid transporter family protein                      |            |
| Pc_TC028129 | 0.56  | 0.1  |      | 0.39  | 0.37 |      |  | 0.01  | 1         |      | 1.32  | 0.01  | Up   | anthranilate synthase beta subunit 1                                     |            |
| Pc_TC028135 | 0.67  | 0.03 |      | 1.46  | 0    | Up   |  | -1.5  | 0.08      |      | 0.19  | 0.71  |      | Major facilitator superfamily protein                                    |            |
| Pc_TC028145 | -0.26 | 0.64 |      | 0.84  | 0.17 |      |  | 2.3   | 0.02      | Up   | 1.52  | 0.02  | Up   | MLP-like protein 423                                                     |            |
| Pc_TC028163 | 2.4   | 0.19 |      | 2.64  | 0.16 |      |  | 3.75  | 0.04      | Up   | 3.21  | 0.04  | Up   | Cytochrome P450 superfamily protein                                      |            |
| Pc_TC028187 | -0.14 | 0.78 |      | -0.85 | 0.18 |      |  | 2.01  | 0.03      | Up   | 0.84  | 0.17  |      | beta glucosidase 14                                                      |            |
| Pc_TC028191 | -0.01 | 0.98 |      | -0.56 | 0.18 |      |  | 1.79  | 0.03      | Up   | 0.43  | 0.39  |      | beta glucosidase 12                                                      |            |
| Pc_TC028193 | -0.95 | 0.24 |      | -2.29 | 0.03 | Down |  | 0.92  | 0.42      |      | -0.07 | 0.96  |      | receptor-like protein kinase 1                                           |            |
| Pc_TC028198 | 0.29  | 0.39 |      | 0.61  | 0.16 |      |  | -4.31 | 1.75E-005 | Down | -2.01 | 0     | Down | C2 calcium/lipid-binding and GRAM domain containing protein              |            |
| Pc_TC028204 | 0.6   | 0.4  |      | 2.19  | 0    | Up   |  | -0.14 | 0.92      |      | -1.06 | 0.24  |      | isocitrate dehydrogenase 1                                               |            |
| Pc_TC028214 | 0.46  | 0.11 |      | 0.45  | 0.24 |      |  | -3.7  | 4.94E-005 | Down | -1.76 | 0     | Down | Cellulase (glycosyl hydrolase family 5) protein                          |            |
| Pc_TC028220 | 0.67  | 0.22 |      | 0.65  | 0.32 |      |  | 0.58  | 0.58      |      | 1.38  | 0.04  | Up   | peptidomethionine sulfoxide reductase 1                                  |            |
| Pc_TC028227 | 2.45  | 0.02 | Up   | 2.56  | 0.03 | Up   |  | -0.5  | 0.89      |      | -1.96 | 0.4   |      | Ubiquitin-like superfamily protein                                       |            |
| Pc_TC028228 | 0.3   | 0.42 |      | 0.69  | 0.14 |      |  | -1.68 | 0.07      |      | -1.43 | 0.01  | Down | unknown protein                                                          |            |
| Pc_TC028240 | -1.78 | 0.03 | Down | 0.43  | 0.6  |      |  | -1    | 0.41      |      | -0.33 | 0.71  |      | nucleotide binding protein 35                                            |            |
| Pc_TC028241 | 1.04  | 0.01 | Up   | 1.26  | 0.01 | Up   |  | 0.53  | 0.56      |      | 0.68  | 0.23  |      | nucleotide binding protein 35                                            |            |
| Pc_TC028243 | 0.44  | 0.21 |      | 0.93  | 0.03 |      |  | -1.52 | 0.09      |      | -1.1  | 0.04  | Down | Ribonuclease inhibitor                                                   |            |
| Pc_TC028260 | 2.33  | 0.02 | Up   | 1.81  | 0.13 |      |  | 4.41  | 0         | Up   | 3.23  | 0     | Up   | basic helix-loop-helix (bHLH) DNA-binding superfamily protein            | bHLH       |
| Pc_TC028274 | 0.84  | 0.16 |      | -0.73 | 0.36 |      |  | -3.53 | 0.01      | Down | -1.01 | 0.21  |      | basic helix-loop-helix (bHLH) DNA-binding superfamily protein            |            |
| Pc_TC028281 | 0.27  | 0.75 |      | -0.84 | 0.39 |      |  | 2.62  | 0.02      | Up   | 1.47  | 0.06  |      | Cytochrome b561/ferric reductase transmembrane with DOMON related domain |            |
| Pc_TC028288 | 0.45  | 0.2  |      | 1.66  | 0    | Up   |  | -3.57 | 0         | Down | -1.34 | 0.02  | Down | alkenal reductase                                                        |            |
| Pc_TC028292 | -1.08 | 0.01 | Down | -1.2  | 0.02 | Down |  | 0.27  | 0.76      |      | -1.27 | 0.02  | Down | Adenosylmethionine decarboxylase family protein                          |            |
| Pc_TC028299 | 0.22  | 0.57 |      | 0.7   | 0.14 |      |  | -1.53 | 0.1       |      | -1.27 | 0.03  | Down | hydroxycinnamoyl-CoA shikimate/quinic acid hydroxycinnamoyl transferase  |            |
| Pc_TC028302 | 2.94  | 0.01 | Up   | 3.52  | 0    | Up   |  | 0.96  | 0.69      |      | 2.53  | 0.06  |      | BTB/POZ domain with WD40/YVTN repeat-like protein                        |            |
| Pc_TC028322 | -0.09 | 0.91 |      | 0.37  | 0.63 |      |  | 2.23  | 0.03      | Up   | 1.42  | 0.05  | Up   | Leucine-rich repeat (LRR) family protein                                 |            |
| Pc_TC028332 | -0.26 | 0.82 |      | -0.21 | 0.87 |      |  | 2.49  | 0.03      | Up   | 1.76  | 0.04  | Up   | Protein of unknown function DUF3493 (InterPro:IPR021883)                 |            |
| Pc_TC028346 | -0.88 | 0.2  |      | 0.04  | 0.97 |      |  | 2.45  | 0.02      | Up   | 1.71  | 0.01  | Up   | Protein kinase superfamily protein                                       |            |
| Pc_TC028364 | 1.68  | 0.01 | Up   | 1.07  | 0.17 |      |  | 1.67  | 0.13      |      | 1.47  | 0.05  |      | Pentatricopeptide repeat (PPR) superfamily protein                       |            |
| Pc_TC028371 | 0.53  | 0.46 |      | 1.19  | 0.12 |      |  | -6.2  | 0         | Down | -1.68 | 0.07  |      | phosphoenolpyruvate carboxylase kinase 1                                 |            |
| Pc_TC028372 | 0.59  | 0.16 |      | 1.14  | 0.02 | Up   |  | 0.13  | 0.89      |      | 0.31  | 0.6   |      | PHE ammonia lyase 1                                                      |            |
| Pc_TC028374 | 0.53  | 0.35 |      | 1     | 0.12 |      |  | 2.22  | 0.03      | Up   | 1.13  | 0.09  |      | PHE ammonia lyase 1                                                      |            |
| Pc_TC028386 | -1.73 | 0.02 | Down | -1.21 | 0.16 |      |  | 1.33  | 0.21      |      | -0.25 | 0.76  |      | Protein of unknown function (DUF3755)                                    |            |
| Pc_TC028397 | 0.97  | 0.02 |      | 1.45  | 0    | Up   |  | -1.71 | 0.08      |      | -1.45 | 0.02  | Down | Endosomal targeting BRO1-like domain-containing protein                  |            |
| Pc_TC028398 | 0.33  | 0.57 |      | 1.3   | 0.04 | Up   |  | -3.4  | 0.01      | Down | -0.77 | 0.3   |      | Endosomal targeting BRO1-like domain-containing protein                  |            |
| Pc_TC028400 | -0.27 | 0.47 |      | 0.25  | 0.58 |      |  | -2.55 | 0.01      | Down | -2.52 | ##### | Down | Endosomal targeting BRO1-like domain-containing protein                  |            |
| Pc_TC028401 | 0.06  | 0.86 |      | 0.41  | 0.35 |      |  | -2.09 | 0.02      | Down | -1.81 | 0     | Down | Endosomal targeting BRO1-like domain-containing protein                  |            |
| Pc_TC028413 | 1.19  | 0.06 |      | 1.28  | 0.08 |      |  | -3.08 | 0.02      | Down | -2.17 | 0.02  | Down | Uncharacterized protein                                                  |            |
| Pc_TC028430 | 1.08  | 0.29 |      | 1.85  | 0.07 |      |  | 2.11  | 0.11      |      | 2.23  | 0.02  | Up   | NAD(P)-binding Rossmann-fold superfamily protein                         |            |
| Pc_TC028431 | 1.18  | 0    | Up   | 1.33  | 0.01 | Up   |  | -0.83 | 0.37      |      | 0.71  | 0.2   |      | NAD(P)-binding Rossmann-fold superfamily protein                         |            |
| Pc_TC028444 | -0.34 | 0.7  |      | -0.01 | 1    |      |  | 2.2   | 0.05      | Up   | 1.14  | 0.15  |      | peroxin 11B                                                              |            |
| Pc_TC028446 | 1.15  | 0.13 |      | 0.78  | 0.4  |      |  | 1.32  | 0.27      |      | 1.77  | 0.03  | Up   | histidine triad nucleotide-binding 4                                     |            |
| Pc_TC028448 | 0.37  | 0.28 |      | 1.14  | 0.01 | Up   |  | -2.39 | 0.01      | Down | -1.55 | 0.01  | Down | Glycosyl hydrolases family 32 protein                                    |            |
| Pc_TC028449 | 0.33  | 0.6  |      | 1.43  | 0.03 | Up   |  | -0.97 | 0.39      |      | 0.01  | 1     |      | Glycosyl hydrolases family 32 protein                                    |            |
| Pc_TC028450 | -3.17 | 0.04 | Down | -1.19 | 0.38 |      |  | 1.06  | 0.42      |      | 1.33  | 0.16  |      | Plant-specific transcription factor YABBY family protein                 | C2C2-YABBY |
| Pc_TC028456 | 0.18  | 0.85 |      | 1.3   | 0.1  |      |  | -2.6  | 0.06      |      | -2.1  | 0.04  | Down | Uncharacterized protein                                                  |            |

|             |       |       |      |  |       |           |      |       |           |      |       |       |      |                                                                                           |             |
|-------------|-------|-------|------|--|-------|-----------|------|-------|-----------|------|-------|-------|------|-------------------------------------------------------------------------------------------|-------------|
| Pc_TC028457 | 1.66  | 0.28  |      |  | 3.7   | 0         | Up   | -0.5  | 0.95      |      | -0.79 | 0.84  |      | Uncharacterized protein                                                                   |             |
| Pc_TC028459 | 1.46  | 0.17  |      |  | 2.84  | 0         | Up   | 0.09  | 1         |      | 1.16  | 0.33  |      | Autophagy-related protein 13                                                              |             |
| Pc_TC028468 | 0.5   | 0.13  |      |  | 1.09  | 0.01      | Up   | -3.82 | 9.02E-005 | Down | -1.5  | 0.01  | Down | homeobox 7                                                                                | HB          |
| Pc_TC028475 | 0.85  | 0.05  |      |  | 1.08  | 0.04      | Up   | -1.18 | 0.23      |      | -0.41 | 0.5   |      | Expressed protein                                                                         | Trihelix    |
| Pc_TC028495 | 0.5   | 0.24  |      |  | 1.03  | 0.04      | Up   | -0.7  | 0.46      |      | 0.05  | 0.93  |      | ethylene responsive element binding factor 1                                              |             |
| Pc_TC028507 | -1.04 | 0.03  | Down |  | -1.46 | 0.01      | Down | -2.16 | 0.03      | Down | -2.01 | 0     | Down | DNAJ homologue 3                                                                          |             |
| Pc_TC028529 | -1.51 | 0.77  |      |  | 0     | 0.48      |      | 3.31  | 0.05      | Up   | 1.85  | 0.29  |      | Pectin lyase-like superfamily protein                                                     |             |
| Pc_TC028530 | 0.66  | 0.81  |      |  | 0.64  | 0.84      |      | 3.73  | 0.01      | Up   | 3.08  | 0.01  | Up   | Pectin lyase-like superfamily protein                                                     |             |
| Pc_TC028533 | 0.55  | 0.65  |      |  | 2.03  | 0.04      | Up   | -0.88 | 0.62      |      | 0.32  | 0.84  |      | alternative oxidase 1A                                                                    |             |
| Pc_TC028534 | -1.22 | 0.21  |      |  | 0.34  | 0.74      |      | 2.41  | 0.03      | Up   | 1.61  | 0.05  |      | Plant VAMP (vesicle-associated membrane protein) family protein                           |             |
| Pc_TC028535 | 0     | 1     |      |  | 2.06  | 0.59      |      | 6.31  | 0         | Up   | 4.71  | 0     | Up   | Bifunctional inhibitor/lipid-transfer protein/seed storage 2S albumin superfamily protein |             |
| Pc_TC028545 | -0.98 | 0.19  |      |  | -0.96 | 0.26      |      | 2.16  | 0.04      | Up   | 0.82  | 0.28  |      | Haloacid dehalogenase-like hydrolase (HAD) superfamily protein                            |             |
| Pc_TC028546 | 0.03  | 0.97  |      |  | -1.26 | 0.07      |      | 2.13  | 0.03      | Up   | 1.32  | 0.04  | Up   | Haloacid dehalogenase-like hydrolase (HAD) superfamily protein                            |             |
| Pc_TC028557 | -0.5  | 0.21  |      |  | -1.09 | 0.04      | Down | 0.95  | 0.28      |      | 0.1   | 0.86  |      | calmodulin-domain protein kinase 9                                                        |             |
| Pc_TC028560 | -2.76 | ##### | Down |  | -2.58 | 7.72E-006 | Down | 0.81  | 0.36      |      | -1.8  | 0     | Down | Prolyl oligopeptidase family protein                                                      |             |
| Pc_TC028573 | -0.56 | 0.7   |      |  | -0.58 | 0.72      |      | 0     | 0.02      |      | -4.18 | 0.03  | Down | Protein kinase superfamily protein                                                        |             |
| Pc_TC028575 | 1.19  | 0.4   |      |  | 2.76  | 0.02      | Up   | 2.87  | 0.05      | Up   | 2.92  | 0.01  | Up   | UDP-Glycosyltransferase superfamily protein                                               |             |
| Pc_TC028578 | 0.44  | 0.5   |      |  | 1.62  | 0.02      | Up   | -0.01 | 1         |      | 0.73  | 0.33  |      | Transmembrane amino acid transporter family protein                                       |             |
| Pc_TC028610 | 0.39  | 0.24  |      |  | 0.39  | 0.36      |      | -3.23 | 0         | Down | -1.82 | 0     | Down | phloem protein 2-A13                                                                      |             |
| Pc_TC028617 | -1.97 | 0.02  | Down |  | -1.73 | 0.07      |      | -0.45 | 0.71      |      | -0.28 | 0.74  |      | cytochrome P450, family 704, subfamily A, polypeptide 2                                   |             |
| Pc_TC028619 | 0.4   | 0.71  |      |  | 1.41  | 0.14      |      | 2.83  | 0.02      | Up   | 1.8   | 0.05  | Up   | FASCICLIN-like arabinogalactan-protein 10                                                 |             |
| Pc_TC028625 | -1.92 | 0.07  |      |  | -0.62 | 0.57      |      | 3.44  | 0         | Up   | 2.08  | 0.01  | Up   | Leucine-rich receptor-like protein kinase family protein                                  |             |
| Pc_TC028633 | -2.9  | ##### | Down |  | -0.82 | 0.23      |      | 0.63  | 0.53      |      | -0.44 | 0.53  |      | TatD related DNase                                                                        |             |
| Pc_TC028635 | 0.54  | 0.29  |      |  | 2.09  | 0         | Up   | -2.66 | 0.02      | Down | 0.54  | 0.4   |      | 1-aminocyclopropane-1-carboxylic acid (acc) synthase 6                                    |             |
| Pc_TC028636 | 0     | 0.64  |      |  | 0     | 0.67      |      | 5.56  | 0         | Up   | 2.33  | 0.22  |      | SPIRAL1-like5                                                                             |             |
| Pc_TC028643 | 0.45  | 0.23  |      |  | 0.6   | 0.21      |      | -4.12 | 8.98E-005 | Down | -1.15 | 0.05  | Down | brassinosteroid-responsive RING-H2                                                        |             |
| Pc_TC028647 | 1.47  | 0     | Up   |  | 2.4   | 3.96E-005 | Up   | -1.08 | 0.32      |      | 0.32  | 0.65  |      | 2-oxoglutarate (2OG) and Fe(II)-dependent oxygenase superfamily protein                   |             |
| Pc_TC028660 | 0.53  | 0.07  |      |  | 0.77  | 0.04      |      | -2.27 | 0.01      | Down | -1.11 | 0.02  | Down | Homeodomain-like superfamily protein                                                      | MYB-related |
| Pc_TC028672 | -0.8  | 0.09  |      |  | -1.08 | 0.06      |      | 1.96  | 0.03      | Up   | 0.94  | 0.1   |      | glutamate receptor 3.3                                                                    |             |
| Pc_TC028673 | -0.8  | 0.05  |      |  | -1.21 | 0.02      | Down | 1.25  | 0.15      |      | 0.44  | 0.42  |      | glutamate receptor 3.3                                                                    |             |
| Pc_TC028675 | 2.08  | 0.13  |      |  | 0.87  | 0.72      |      | 2.03  | 0.25      |      | 2.83  | 0.03  | Up   | CCAAT-binding factor                                                                      |             |
| Pc_TC028679 | -1.24 | 0.04  | Down |  | -0.43 | 0.53      |      | 0.56  | 0.58      |      | -0.91 | 0.2   |      | Protein of unknown function (DUF581)                                                      |             |
| Pc_TC028708 | -2.58 | 0.01  | Down |  | -0.49 | 0.63      |      | 0.91  | 0.44      |      | 0.99  | 0.24  |      | OSINBa0009P12.25 protein                                                                  |             |
| Pc_TC028724 | 2.54  | 0.01  | Up   |  | 2.79  | 0.01      | Up   | -0.5  | 0.85      |      | 2.83  | 0.01  | Up   | peptide transporter 5                                                                     |             |
| Pc_TC028730 | -0.83 | 0.21  |      |  | -1.37 | 0.09      |      | 2.18  | 0.03      | Up   | 1.24  | 0.07  |      | Wall-associated kinase family protein                                                     |             |
| Pc_TC028732 | 0.06  | 0.95  |      |  | -0.51 | 0.55      |      | 2.71  | 0.01      | Up   | 1.92  | 0.01  | Up   | wall associated kinase-like 1                                                             |             |
| Pc_TC028741 | 0.5   | 0.4   |      |  | 2.27  | 0         | Up   | -2.75 | 0.02      | Down | -0.55 | 0.47  |      | alternative oxidase 1B                                                                    |             |
| Pc_TC028751 | -0.43 | 0.48  |      |  | -0.23 | 0.76      |      | 2.13  | 0.03      | Up   | 0.46  | 0.51  |      | Pectinacetylsterase family protein                                                        |             |
| Pc_TC028754 | -0.67 | 0.22  |      |  | -0.13 | 0.84      |      | -0.56 | 0.59      |      | -2.2  | 0     | Down | yeast YAK1-related gene 1                                                                 |             |
| Pc_TC028774 | -1.41 | 0.03  | Down |  | 0.03  | 0.98      |      | -0.01 | 1         |      | -0.33 | 0.66  |      | galacturonic acid kinase                                                                  |             |
| Pc_TC028791 | 2.08  | 0.3   |      |  | 3.31  | 0.04      | Up   | 0     | 0.53      |      | 0     | 0.54  |      | Uncharacterized protein                                                                   |             |
| Pc_TC028795 | 0.69  | 0.3   |      |  | 1.53  | 0.03      | Up   | 1.05  | 0.34      |      | 1.17  | 0.12  |      | HXXXD-type acyl-transferase family protein                                                |             |
| Pc_TC028801 | -0.35 | 0.43  |      |  | -0.76 | 0.18      |      | 1.81  | 0.04      | Up   | 0.72  | 0.21  |      | N-acetylglucosamine-1-phosphate uridylyltransferase 1                                     |             |
| Pc_TC028806 | 0.62  | 0.27  |      |  | 0.98  | 0.13      |      | -2.62 | 0.03      | Down | -1.13 | 0.13  |      | K-box region and MADS-box transcription factor family protein                             | MADS        |
| Pc_TC028807 | 0.75  | 0.2   |      |  | 1.76  | 0.01      | Up   | -0.26 | 0.82      |      | 0.67  | 0.35  |      | Pyridoxal phosphate (PLP)-dependent transferases superfamily protein                      |             |
| Pc_TC028818 | -0.42 | 0.49  |      |  | 0.04  | 0.97      |      | 0.73  | 0.48      |      | 1.31  | 0.05  | Up   | Leucine-rich repeat transmembrane protein kinase                                          |             |
| Pc_TC028822 | 0.84  | 0.07  |      |  | 1.39  | 0.01      | Up   | -2.43 | 0.02      | Down | 0.64  | 0.3   |      | Leucine-rich repeat transmembrane protein kinase                                          |             |
| Pc_TC028843 | 0.48  | 0.13  |      |  | 0.76  | 0.06      |      | -1.8  | 0.04      | Down | 0.03  | 0.95  |      | polyamine oxidase 2                                                                       |             |
| Pc_TC028846 | 1.76  | 0.02  | Up   |  | 3.63  | 1.87E-006 | Up   | 0.13  | 0.95      |      | 2.04  | 0.02  | Up   | Aldolase-type TIM barrel family protein                                                   |             |
| Pc_TC028848 | -0.42 | 0.18  |      |  | -0.85 | 0.04      |      | 2.1   | 0.01      | Up   | 1.12  | 0.02  | Up   | Glycine cleavage T-protein family                                                         |             |
| Pc_TC028879 | 0.66  | 0.97  |      |  | 2.38  | 0.24      |      | 3.79  | 0.03      | Up   | 1.43  | 0.58  |      | xyloglucan endotransglucosylase/hydrolase 9                                               |             |
| Pc_TC028891 | 0.19  | 0.84  |      |  | 0.42  | 0.65      |      | 2.33  | 0.04      | Up   | 0.92  | 0.27  |      | Wound-responsive family protein                                                           |             |
| Pc_TC028911 | -1    | 0.26  |      |  | 0.13  | 0.91      |      | 4.08  | 0         | Up   | 2.42  | 0     | Up   | beta-D-xylosidase 4                                                                       |             |
| Pc_TC028920 | -0.41 | 0.43  |      |  | -0.35 | 0.58      |      | 1.87  | 0.05      | Up   | 0.86  | 0.16  |      | Amidase family protein                                                                    |             |
| Pc_TC028928 | 2.89  | 0.23  |      |  | 4.52  | 0.01      | Up   | 4.41  | 0.03      | Up   | 3.71  | 0.06  |      | Sterile alpha motif (SAM) domain-containing protein                                       |             |
| Pc_TC028932 | -0.78 | 0.04  |      |  | -1.47 | 0         | Down | 2.24  | 0.01      | Up   | 1.22  | 0.02  | Up   | alpha/beta-Hydrolases superfamily protein                                                 |             |
| Pc_TC028948 | 1.23  | 0.04  | Up   |  | 1.01  | 0.16      |      | 2.24  | 0.03      | Up   | 1.63  | 0.02  | Up   | Integrase-type DNA-binding superfamily protein                                            | AP2-EREBP   |
| Pc_TC028955 | 2.4   | 0.4   |      |  | 4.15  | 0.03      | Up   | 0.5   | 1         |      | 1.21  | 0.89  |      | SGNH hydrolase-type esterase superfamily protein                                          |             |
| Pc_TC028956 | 0.89  | 0.37  |      |  | 1.06  | 0.32      |      | 1.9   | 0.14      |      | 1.97  | 0.04  | Up   | UDP-glucosyl transferase 89B1                                                             |             |
| Pc_TC028959 | 0.08  | 1     |      |  | 2.92  | 0         | Up   | 0.15  | 0.96      |      | 0.08  | 1     |      | N-terminal nucleophile aminohydrolases (Ntn hydrolases) superfamily protein               |             |
| Pc_TC028960 | 0.74  | 0.02  |      |  | 0.34  | 0.4       |      | 0.48  | 0.57      |      | 2.14  | ##### | Up   | D-3-phosphoglycerate dehydrogenase                                                        |             |
| Pc_TC028964 | 0.96  | 0.07  |      |  | 1.34  | 0.03      | Up   | -2.2  | 0.05      |      | -2.85 | 0     | Down | endonuclease 2                                                                            |             |

|             |       |       |      |       |      |      |  |       |      |      |       |      |      |                                                                           |                  |
|-------------|-------|-------|------|-------|------|------|--|-------|------|------|-------|------|------|---------------------------------------------------------------------------|------------------|
| Pc_TC028965 | 0.28  | 0.4   |      | 0.25  | 0.54 |      |  | -2.5  | 0.01 | Down | -0.73 | 0.15 |      | endonuclease 2                                                            |                  |
| Pc_TC028971 | 0.87  | 0.1   |      | 1.4   | 0.02 | Up   |  | -1.79 | 0.1  |      | -0.21 | 0.77 |      | AINTEGUMENTA-like 5                                                       | AP2-EREBP        |
| Pc_TC028972 | 0.67  | 0.16  |      | 1.05  | 0.06 |      |  | -2.43 | 0.02 | Down | -1.49 | 0.03 | Down | AINTEGUMENTA-like 5                                                       | AP2-EREBP        |
| Pc_TC028973 | -0.57 | 0.6   |      | -1.26 | 0.3  |      |  | 2.64  | 0.02 | Up   | 1.3   | 0.14 |      | Protein kinase superfamily protein                                        |                  |
| Pc_TC028977 | -3.83 | 0.04  | Down | -0.15 | 0.97 |      |  | -0.4  | 0.83 |      | -0.03 | 1    |      | S-domain-2 5                                                              |                  |
| Pc_TC028978 | 1.43  | 0.04  | Up   | 1.55  | 0.06 |      |  | -0.42 | 0.76 |      | 0.07  | 0.97 |      | lectin protein kinase family protein                                      |                  |
| Pc_TC028982 | 0     | 0.64  |      | 1.06  | 0.8  |      |  | 4.69  | 0    | Up   | 2.43  | 0.19 |      | Peroxidase superfamily protein                                            |                  |
| Pc_TC028984 | -1.97 | 0.07  |      | -3.21 | 0.02 | Down |  | 1.92  | 0.1  |      | 0.55  | 0.56 |      | alpha/beta-Hydrolases superfamily protein                                 |                  |
| Pc_TC028993 | 0.34  | 0.96  |      | 0     | 0.27 |      |  | 3.25  | 0.03 | Up   | 1.76  | 0.21 |      | OSiGBa0132E09-OSiGBa0108L24.12 protein                                    |                  |
| Pc_TC028994 | -0.31 | 0.29  |      | -0.78 | 0.04 |      |  | 2.13  | 0.02 | Up   | 1.09  | 0.03 | Up   | glutamine synthetase 2                                                    |                  |
| Pc_TC028995 | -2.51 | 0.03  | Down | -1.15 | 0.31 |      |  | 2.28  | 0.05 | Up   | 0.55  | 0.56 |      | glutamine synthetase 2                                                    |                  |
| Pc_TC029000 | -0.1  | 0.88  |      | -1    | 0.18 |      |  | 2.24  | 0.03 | Up   | 1.93  | 0    | Up   | amino acid permease 7                                                     |                  |
| Pc_TC029001 | 3.78  | 0.05  | Up   | 1.06  | 0.98 |      |  | 5.06  | 0.01 | Up   | 4.58  | 0.01 | Up   | amino acid permease 7                                                     |                  |
| Pc_TC029034 | 0.26  | 0.5   |      | -0.23 | 0.64 |      |  | 1.34  | 0.12 |      | 1.32  | 0.01 | Up   | Plastid-lipid associated protein PAP / fibrillin family protein           |                  |
| Pc_TC029035 | -0.41 | 0.25  |      | -1.8  | 0    | Down |  | -0.31 | 0.72 |      | -0.34 | 0.52 |      | Plastid-lipid associated protein PAP / fibrillin family protein           |                  |
| Pc_TC029042 | -0.92 | 0.41  |      | 0     | 0    |      |  | -1.63 | 0.28 |      | -4.83 | 0    | Down | KAR-UP oxidoreductase 1                                                   |                  |
| Pc_TC029043 | -0.63 | 0.61  |      | -4.11 | 0.03 | Down |  | 0.54  | 0.71 |      | 0.81  | 0.44 |      | ubiquitin C-terminal hydrolase 3                                          |                  |
| Pc_TC029056 | 0.43  | 0.37  |      | 1     | 0.08 |      |  | -1.9  | 0.07 |      | -1.66 | 0.02 | Down | EPS15 homology domain 1                                                   |                  |
| Pc_TC029063 | 2.08  | 0.13  |      | 3.1   | 0.02 | Up   |  | 2.41  | 0.15 |      | 2.21  | 0.12 |      | Leucine-rich repeat (LRR) family protein                                  |                  |
| Pc_TC029064 | 0.29  | 0.34  |      | 0.19  | 0.63 |      |  | -1.74 | 0.04 | Down | -1.44 | 0    | Down | Granulin repeat cysteine protease family protein                          |                  |
| Pc_TC029078 | -1.81 | ##### | Down | -0.24 | 0.65 |      |  | 1.42  | 0.11 |      | 0.95  | 0.09 |      | auxin response factor 8                                                   | ARF              |
| Pc_TC029092 | 0.78  | 0.1   |      | 1.27  | 0.02 | Up   |  | -0.52 | 0.6  |      | 0.47  | 0.46 |      | DHHC-type zinc finger family protein                                      |                  |
| Pc_TC029107 | 2.27  | 0.01  | Up   | 1.76  | 0.1  |      |  | -0.27 | 0.91 |      | 0.5   | 0.72 |      | protein arginine methyltransferase 6                                      |                  |
| Pc_TC029112 | -0.4  | 0.28  |      | -0.26 | 0.58 |      |  | 1.69  | 0.05 | Up   | 0.78  | 0.14 |      | Transducin/WD40 repeat-like superfamily protein                           |                  |
| Pc_TC029118 | -0.82 | 0.35  |      | -0.44 | 0.66 |      |  | 3.52  | 0    | Up   | 1.44  | 0.07 |      | protochlorophyllide oxidoreductase A                                      |                  |
| Pc_TC029120 | -0.47 | 0.51  |      | 0.23  | 0.78 |      |  | 3.5   | 0    | Up   | 1.2   | 0.1  |      | protochlorophyllide oxidoreductase C                                      |                  |
| Pc_TC029142 | 0.45  | 0.64  |      | 0.64  | 0.53 |      |  | -4.08 | 0.03 | Down | -1.64 | 0.17 |      | adenosine deaminases;RNA binding;RNA binding;adenosine deaminases         |                  |
| Pc_TC029145 | 0.31  | 0.71  |      | 2.12  | 0    | Up   |  | -0.36 | 0.78 |      | 0.08  | 0.96 |      | AMP-dependent synthetase and ligase family protein                        |                  |
| Pc_TC029160 | 0.5   | 0.15  |      | 1.3   | 0    | Up   |  | -2.73 | 0    | Down | -1.49 | 0.01 | Down | Late embryogenesis abundant (LEA) hydroxyproline-rich glycoprotein family |                  |
| Pc_TC029176 | 0.65  | 0.22  |      | 1.01  | 0.11 |      |  | 0.64  | 0.53 |      | 1.53  | 0.02 | Up   | Peroxidase superfamily protein                                            |                  |
| Pc_TC029197 | -0.13 | 0.8   |      | -1.39 | 0.03 | Down |  | 1.23  | 0.2  |      | 0.58  | 0.35 |      | unknown protein                                                           |                  |
| Pc_TC029201 | 1.54  | 0.04  | Up   | 0.41  | 0.7  |      |  | 1.32  | 0.28 |      | 1.21  | 0.18 |      | proteinaceous RNase P 1                                                   |                  |
| Pc_TC029212 | -0.25 | 0.72  |      | -0.86 | 0.3  |      |  | 2.19  | 0.04 | Up   | 0.98  | 0.18 |      | cytochrome P450, family 722, subfamily A, polypeptide 1                   |                  |
| Pc_TC029215 | -2.18 | 0.02  | Down | -1.53 | 0.12 |      |  | 1.93  | 0.08 |      | 0.36  | 0.68 |      | basic helix-loop-helix (bHLH) DNA-binding superfamily protein             | bHLH             |
| Pc_TC029222 | 0.58  | 0.44  |      | 0.49  | 0.58 |      |  | 2.85  | 0.01 | Up   | 1.98  | 0.01 | Up   | formin homology 1                                                         |                  |
| Pc_TC029225 | 1.97  | 0.08  |      | 2.89  | 0.01 | Up   |  | 0.4   | 0.89 |      | 1.52  | 0.23 |      | polygalacturonase inhibiting protein 2                                    |                  |
| Pc_TC029234 | -2.46 | 0.03  | Down | -0.41 | 0.72 |      |  | -2.03 | 0.16 |      | -2.65 | 0.03 | Down | carboxyl terminus of HSC70-interacting protein                            | TPR              |
| Pc_TC029267 | 3.78  | 0.05  | Up   | 3.38  | 0.14 |      |  | 2.31  | 0.48 |      | 4.21  | 0.02 | Up   | receptor-like protein kinase-related family protein                       |                  |
| Pc_TC029276 | -1.18 | 0.02  | Down | -1.23 | 0.04 | Down |  | 0.46  | 0.62 |      | -0.74 | 0.23 |      | myb domain protein 59                                                     | MYB              |
| Pc_TC029279 | 0.54  | 0.26  |      | 0.28  | 0.64 |      |  | -2.56 | 0.02 | Down | 0.41  | 0.52 |      | Expressed protein                                                         |                  |
| Pc_TC029283 | 1.04  | 0.01  | Up   | -0.01 | 0.99 |      |  | 0.22  | 0.81 |      | 0.56  | 0.33 |      | mitogen-activated protein kinase phosphatase 1                            |                  |
| Pc_TC029288 | -0.03 | 0.97  |      | 0.08  | 0.92 |      |  | 2.05  | 0.04 | Up   | 1.09  | 0.1  |      | P-loop containing nucleoside triphosphate hydrolases superfamily protein  |                  |
| Pc_TC029295 | 0.56  | 0.82  |      | 2.87  | 0.02 | Up   |  | -0.5  | 0.91 |      | -0.37 | 0.96 |      | Similar to an Arabidopsis thaliana chromosome BAC genomic sequence        |                  |
| Pc_TC029298 | 0.9   | 0.11  |      | 1.47  | 0.02 | Up   |  | 0.01  | 1    |      | 0.41  | 0.57 |      | ABC-2 type transporter family protein                                     |                  |
| Pc_TC029305 | -0.89 | 0.12  |      | -2.15 | 0    | Down |  | 0.55  | 0.58 |      | -1.09 | 0.12 |      | integral membrane TerC family protein                                     |                  |
| Pc_TC029312 | 0.78  | 0.17  |      | 1.12  | 0.09 |      |  | -4.73 | 0    | Down | -1.91 | 0.02 | Down | Low temperature and salt responsive protein family                        |                  |
| Pc_TC029313 | 0.42  | 0.15  |      | 0.42  | 0.26 |      |  | -1.92 | 0.02 | Down | -0.97 | 0.05 |      | tetraspanin3                                                              |                  |
| Pc_TC029326 | 0.56  | 0.27  |      | 1.19  | 0.04 | Up   |  | -1.83 | 0.09 |      | -1.06 | 0.13 |      | CRINKLY4 related 3                                                        |                  |
| Pc_TC029328 | -0.48 | 0.33  |      | -0.95 | 0.13 |      |  | 1.76  | 0.06 |      | 1.33  | 0.02 | Up   | Expressed protein                                                         |                  |
| Pc_TC029339 | 0.71  | 0.57  |      | 2.58  | 0.01 | Up   |  | -0.96 | 0.62 |      | 1.02  | 0.39 |      | myb domain protein 78                                                     | MYB, MYB-related |
| Pc_TC029348 | -0.3  | 0.79  |      | 0.26  | 0.82 |      |  | 2.96  | 0.01 | Up   | 0.88  | 0.34 |      | Peroxidase superfamily protein                                            |                  |
| Pc_TC029354 | -1.55 | 0     | Down | -1.81 | 0    | Down |  | -1.24 | 0.17 |      | -0.66 | 0.23 |      | Saposin-like aspartyl protease family protein                             |                  |
| Pc_TC029360 | 0.27  | 0.66  |      | 0.2   | 0.79 |      |  | -2.58 | 0.03 | Down | -1.54 | 0.05 | Down | unknown protein                                                           |                  |
| Pc_TC029382 | -2.01 | 0.02  | Down | -1.29 | 0.18 |      |  | -0.44 | 0.72 |      | -0.69 | 0.44 |      | Os05g0146100 protein                                                      |                  |
| Pc_TC029397 | 0.11  | 0.82  |      | 0.32  | 0.57 |      |  | 1.96  | 0.03 | Up   | 1.34  | 0.02 | Up   | 2-oxoglutarate (2OG) and Fe(II)-dependent oxygenase superfamily protein   |                  |
| Pc_TC029460 | -0.24 | 0.87  |      | 0.87  | 0.4  |      |  | 2.44  | 0.04 | Up   | 1.14  | 0.24 |      | FASCIKLIN-like arabinogalactan-protein 11                                 |                  |
| Pc_TC029472 | -0.28 | 0.67  |      | -1.65 | 0.04 | Down |  | 0.56  | 0.6  |      | -0.15 | 0.85 |      | S-locus lectin protein kinase family protein                              |                  |
| Pc_TC029482 | 1.4   | 0.61  |      | 0.64  | 0.98 |      |  | 4.36  | 0.01 | Up   | 2.8   | 0.1  |      | Protein of Unknown Function (DUF239)                                      |                  |
| Pc_TC029483 | 0.66  | 0.62  |      | 2.23  | 0.04 | Up   |  | 0     | 0.05 |      | -0.24 | 0.94 |      | Adenine nucleotide alpha hydrolases-like superfamily protein              |                  |
| Pc_TC029484 | -0.57 | 0.44  |      | -0.49 | 0.57 |      |  | 2.4   | 0.02 | Up   | 1.6   | 0.03 | Up   | Leucine-rich repeat transmembrane protein kinase                          |                  |
| Pc_TC029492 | -0.55 | 0.36  |      | -0.28 | 0.69 |      |  | 2.17  | 0.03 | Up   | 0.7   | 0.3  |      | Protein of unknown function (DUF630 and DUF632)                           |                  |
| Pc_TC029501 | 1.27  | 0.11  |      | 1.94  | 0.02 | Up   |  | -1.97 | 0.19 |      | 0.86  | 0.36 |      | unknown protein                                                           |                  |

|             |       |       |      |       |           |      |       |           |      |       |       |      |                                                                                 |           |
|-------------|-------|-------|------|-------|-----------|------|-------|-----------|------|-------|-------|------|---------------------------------------------------------------------------------|-----------|
| Pc_TC029507 | -0.13 | 0.78  |      | -0.52 | 0.38      |      | -1.01 | 0.31      |      | -1.65 | 0.01  | Down | indoleacetic acid-induced protein 16                                            | AUX/IAA   |
| Pc_TC029514 | 0.46  | 0.35  |      | 1.23  | 0.03      | Up   | -0.34 | 0.74      |      | -0.02 | 0.98  |      | indole-3-acetate beta-D-glucosyltransferase                                     |           |
| Pc_TC029530 | 0.74  | 0.22  |      | 1.03  | 0.14      |      | -2.44 | 0.05      | Down | -0.31 | 0.69  |      | WRKY DNA-binding protein 50                                                     | WRKY      |
| Pc_TC029536 | -2.54 | 0     | Down | -2.64 | 0         | Down | -2.68 | 0.02      | Down | -2.73 | 0     | Down | actin binding protein family                                                    |           |
| Pc_TC029554 | 0.4   | 0.85  |      | 2.89  | 0.01      | Up   | 1.59  | 0.3       |      | 1.02  | 0.45  |      | HAD superfamily,subfamily IIIB acid phosphatase                                 |           |
| Pc_TC029556 | 1.03  | 0.06  |      | 1.51  | 0.02      | Up   | -3.44 | 0.01      | Down | -0.47 | 0.54  |      | NAC domain containing protein 75                                                | NAC       |
| Pc_TC029557 | 0.02  | 0.99  |      | 1.66  | 0.01      | Up   | -2.56 | 0.03      | Down | -1.77 | 0.03  | Down | NAC domain containing protein 75                                                | NAC       |
| Pc_TC029559 | 0.21  | 0.68  |      | 1.61  | 0         | Up   | -2.16 | 0.04      | Down | -1.9  | 0.01  | Down | phosphofructokinase 3                                                           |           |
| Pc_TC029560 | 0.09  | 0.8   |      | 0.08  | 0.85      |      | -1.61 | 0.07      |      | -1.51 | 0.01  | Down | Zinc finger C-x8-C-x5-C-x3-H type family protein                                | C3H       |
| Pc_TC029570 | 0.21  | 0.52  |      | 0.41  | 0.32      |      | -1.94 | 0.03      | Down | -0.69 | 0.18  |      | zinc transporter 4 precursor                                                    |           |
| Pc_TC029571 | 0.39  | 0.44  |      | 0.32  | 0.6       |      | -1.32 | 0.21      |      | -1.66 | 0.02  | Down | Late embryogenesis abundant (LEA) hydroxyproline-rich glycoprotein family       |           |
| Pc_TC029579 | 0.42  | 0.3   |      | 0.52  | 0.31      |      | -2.35 | 0.02      | Down | -0.83 | 0.16  |      | NOD26-like intrinsic protein 4;2                                                |           |
| Pc_TC029586 | 1.97  | 0.08  |      | -1.75 | 0.48      |      | 2.89  | 0.04      | Up   | 2.63  | 0.02  | Up   | Protein kinase superfamily protein                                              |           |
| Pc_TC029588 | 0.62  | 0.5   |      | 1.97  | 0.02      | Up   | -3.96 | 0.03      | Down | -1.13 | 0.34  |      | CBL-interacting protein kinase 23                                               |           |
| Pc_TC029596 | -0.11 | 0.87  |      | 0.54  | 0.45      |      | 2.48  | 0.02      | Up   | 1.3   | 0.06  |      | tetratricopeptide-repeat thioredoxin-like 1                                     | TPR       |
| Pc_TC029600 | -0.71 | 0.3   |      | 0.1   | 0.9       |      | -0.25 | 0.82      |      | -1.74 | 0.04  | Down | Leucine-rich repeat (LRR) family protein                                        |           |
| Pc_TC029613 | 0.25  | 0.95  |      | 2.31  | 0.04      | Up   | 0.83  | 0.64      |      | 0.08  | 1     |      | SLAC1 homologue 3                                                               |           |
| Pc_TC029623 | 0.42  | 0.14  |      | -0.03 | 0.94      |      | -1.68 | 0.05      | Down | -1.26 | 0.01  | Down | Os05g0227600 protein                                                            |           |
| Pc_TC029624 | 0.36  | 0.22  |      | 0.02  | 0.96      |      | -1.75 | 0.04      | Down | -1.44 | 0     | Down | Putative uncharacterized protein OSJNBa0060G17.10                               |           |
| Pc_TC029633 | -1.08 | 0.08  |      | -1.64 | 0.03      | Down | 2.16  | 0.03      | Up   | 0.92  | 0.17  |      | unknown protein                                                                 |           |
| Pc_TC029638 | -0.84 | 0.16  |      | -1.08 | 0.13      |      | 2.44  | 0.01      | Up   | 0.52  | 0.44  |      | minichromosome maintenance (MCM2/3/5) family protein                            |           |
| Pc_TC029662 | -0.03 | 0.96  |      | 0.76  | 0.21      |      | -1.08 | 0.3       |      | -1.62 | 0.02  | Down | chitinase A                                                                     |           |
| Pc_TC029664 | 1.48  | 0.05  | Up   | 0.01  | 1         |      | 0.6   | 0.64      |      | 1.56  | 0.06  |      | switch 2                                                                        | SNF2      |
| Pc_TC029666 | 0.29  | 0.54  |      | 1.15  | 0.04      | Up   | -0.99 | 0.32      |      | -0.6  | 0.35  |      | chitinase A                                                                     |           |
| Pc_TC029675 | -0.71 | 0.3   |      | -1.35 | 0.1       |      | 2.09  | 0.04      | Up   | 1.23  | 0.08  |      | Protein of unknown function (DUF630 and DUF632)                                 |           |
| Pc_TC029678 | -2.77 | ##### | Down | -0.83 | 0.2       |      | -0.08 | 0.94      |      | -0.73 | 0.28  |      | Leucine-rich repeat transmembrane protein kinase                                |           |
| Pc_TC029682 | 1.19  | 0     | Up   | -1.35 | 0.02      | Down | 1.44  | 0.11      |      | 1.02  | 0.08  |      | terpenoid synthase 13                                                           |           |
| Pc_TC029715 | -0.08 | 0.81  |      | -0.53 | 0.25      |      | 1.51  | 0.08      |      | 1.17  | 0.02  | Up   | Tetratricopeptide repeat (TPR)-like superfamily protein                         |           |
| Pc_TC029725 | 1.08  | 0.97  |      | 2.87  | 0.28      |      | 3.59  | 0.13      |      | 3.87  | 0.04  | Up   | germin-like protein 10                                                          |           |
| Pc_TC029727 | 2.4   | 0.4   |      | 1.06  | 0.98      |      | 5.57  | 0         | Up   | 2.63  | 0.32  |      | Pseudouridine synthase family protein                                           |           |
| Pc_TC029728 | 3.25  | 0.03  | Up   | 0.06  | 1         |      | 0     | 0.53      |      | 1.63  | 0.49  |      | Pseudouridine synthase family protein                                           |           |
| Pc_TC029739 | 0.58  | 0.13  |      | 1     | 0.04      |      | -2.48 | 0.01      | Down | -0.64 | 0.26  |      | Arabidopsis Inositol phosphorylceramide synthase 1                              |           |
| Pc_TC029740 | 1.92  | 0     | Up   | 0.92  | 0.26      |      | -0.91 | 0.47      |      | 0.19  | 0.84  |      | Arabidopsis Inositol phosphorylceramide synthase 1                              |           |
| Pc_TC029741 | -0.59 | 0.34  |      | 1.06  | 0.1       |      | -2.64 | 0.02      | Down | -1.39 | 0.07  |      | Arabidopsis Inositol phosphorylceramide synthase 1                              |           |
| Pc_TC029742 | 3.35  | 0.01  | Up   | 3.8   | 0         | Up   | 1.24  | 0.62      |      | 2.04  | 0.22  |      | crooked neck protein,putative / cell cycle protein,putative                     |           |
| Pc_TC029768 | 3.35  | ##### | Up   | 3.47  | 0         | Up   | 2.75  | 0.03      | Up   | 1.71  | 0.1   |      | Zinc-finger domain of monoamine-oxidase A repressor R1 protein                  |           |
| Pc_TC029783 | 0.92  | 0.27  |      | 0.33  | 0.78      |      | -2.08 | 0.18      |      | -2.64 | 0.04  | Down | Leucine-rich repeat protein kinase family protein                               |           |
| Pc_TC029786 | -1.41 | 0.01  | Down | -1.22 | 0.06      |      | 0.87  | 0.37      |      | 0.29  | 0.66  |      | dsRNA-binding domain-like superfamily protein                                   |           |
| Pc_TC029802 | 0.41  | 0.17  |      | 0.22  | 0.58      |      | -1.68 | 0.05      | Down | -0.97 | 0.05  |      | chaperone protein dnaJ-related                                                  |           |
| Pc_TC029815 | 0.73  | 0.02  |      | 1.13  | 0         | Up   | -1.02 | 0.23      |      | 0.14  | 0.78  |      | cinnamate-4-hydroxylase                                                         |           |
| Pc_TC029820 | -1.29 | 0.07  |      | -2.47 | 0.01      | Down | 0.84  | 0.43      |      | 0.18  | 0.82  |      | N2,N2-dimethylguanosine tRNA methyltransferase                                  |           |
| Pc_TC029833 | -0.28 | 0.46  |      | -0.65 | 0.19      |      | 1.83  | 0.03      | Up   | 1.08  | 0.04  | Up   | Heavy metal transport/detoxification superfamily protein                        |           |
| Pc_TC029839 | 0.71  | 0.37  |      | 1.92  | 0.02      | Up   | -0.5  | 0.72      |      | 0.6   | 0.51  |      | Uncharacterised protein family (UPF0497)                                        |           |
| Pc_TC029843 | -0.31 | 0.36  |      | -1.28 | 0         | Down | -0.52 | 0.54      |      | -0.29 | 0.57  |      | BTB/POZ domain-containing protein                                               |           |
| Pc_TC029844 | 0.75  | 0.06  |      | 1.73  | 0         | Up   | 0.01  | 0.99      |      | -1.19 | 0.05  |      | BTB/POZ domain-containing protein                                               |           |
| Pc_TC029846 | 0.18  | 0.75  |      | 1.26  | 0.04      | Up   | -1.42 | 0.19      |      | -1.1  | 0.13  |      | DRE-binding protein 2A                                                          | AP2-EREBP |
| Pc_TC029851 | -0.88 | 0.12  |      | -2.84 | 0         | Down | 0.83  | 0.4       |      | 0.17  | 0.8   |      | inorganic carbon transport protein-related                                      |           |
| Pc_TC029852 | -3.05 | 0.01  | Down | -0.49 | 0.64      |      | 1.7   | 0.14      |      | 0.08  | 0.96  |      | inorganic carbon transport protein-related                                      |           |
| Pc_TC029857 | -0.76 | 0.11  |      | -1.19 | 0.05      | Down | 1.51  | 0.1       |      | 0.67  | 0.26  |      | UbiA prenyltransferase family protein                                           |           |
| Pc_TC029876 | 1.12  | 0.09  |      | -0.82 | 0.36      |      | 1.99  | 0.07      |      | 2.16  | 0     | Up   | farnesylated protein-converting enzyme 2                                        |           |
| Pc_TC029883 | 0.27  | 0.37  |      | 0.62  | 0.1       |      | -1.8  | 0.03      | Down | -0.87 | 0.08  |      | phospholipase D P1                                                              |           |
| Pc_TC029884 | 0.16  | 0.7   |      | 0.93  | 0.06      |      | -1.72 | 0.08      |      | -1.25 | 0.04  | Down | phospholipase D P1                                                              |           |
| Pc_TC029891 | 3.94  | ##### | Up   | 4.18  | 1.40E-005 | Up   | -0.5  | 0.87      |      | 2.88  | 0.01  | Up   | Plant invertase/pectin methylesterase inhibitor superfamily                     |           |
| Pc_TC029894 | 1.33  | 0.05  | Up   | 1.45  | 0.06      |      | 2.15  | 0.05      |      | 1.35  | 0.09  |      | multifunctional protein 2                                                       |           |
| Pc_TC029895 | -1.73 | 0.01  | Down | -1.92 | 0.01      | Down | -0.73 | 0.49      |      | -1.9  | 0.01  | Down | multifunctional protein 2                                                       |           |
| Pc_TC029907 | -0.66 | 0.5   |      | -2.53 | 0.05      | Down | 0.24  | 0.87      |      | 0.04  | 1     |      | beta glucosidase 11                                                             |           |
| Pc_TC029911 | 0.62  | 0.11  |      | 0.74  | 0.13      |      | -2.34 | 0.02      | Down | 0.43  | 0.44  |      | beta glucosidase 11                                                             |           |
| Pc_TC029912 | 0.25  | 0.58  |      | 1.47  | 0.01      | Up   | -1.19 | 0.23      |      | 0.17  | 0.78  |      | beta glucosidase 8                                                              |           |
| Pc_TC029934 | 0.85  | 0.02  |      | -0.29 | 0.56      |      | 1.11  | 0.2       |      | 2.23  | ##### | Up   | Glycosyl hydrolase superfamily protein                                          |           |
| Pc_TC029950 | 0.62  | 0.21  |      | 2.1   | 0         | Up   | 0     | 5.29E-008 |      | -3.82 | ##### | Down | AWPM-19-like family protein                                                     |           |
| Pc_TC029962 | 1.97  | 0     | Up   | 0.45  | 0.59      |      | 2.64  | 0.01      | Up   | 2.15  | 0     | Up   | COBRA-like extracellular glycosyl-phosphatidyl inositol-anchored protein family |           |
| Pc_TC029989 | -0.27 | 0.41  |      | -0.1  | 0.81      |      | -1.94 | 0.03      | Down | -1.8  | 0     | Down | debranching enzyme 1                                                            |           |

|             |       |       |      |       |      |      |       |      |      |       |       |      |                                                                               |      |
|-------------|-------|-------|------|-------|------|------|-------|------|------|-------|-------|------|-------------------------------------------------------------------------------|------|
| Pc_TC030039 | 0.31  | 0.6   |      | 1.27  | 0.05 | Up   | -2.71 | 0.02 | Down | -1.26 | 0.09  |      | carboxyesterase 17                                                            |      |
| Pc_TC030040 | 0.4   | 0.31  |      | 1.06  | 0.03 | Up   | -2.65 | 0.01 | Down | -1.06 | 0.07  |      | Major facilitator superfamily protein                                         |      |
| Pc_TC030046 | 2.04  | 0.01  | Up   | 0.92  | 0.39 |      | 0.42  | 0.79 |      | -1.29 | 0.32  |      | beta-6 tubulin                                                                |      |
| Pc_TC030071 | 0.4   | 0.27  |      | 1.04  | 0.02 | Up   | -1.91 | 0.04 | Down | -0.55 | 0.32  |      | NAC (No Apical Meristem) domain transcriptional regulator superfamily protein | NAC  |
| Pc_TC030072 | 0.33  | 0.76  |      | 1.22  | 0.2  |      | -3.89 | 0.04 | Down | -1.96 | 0.12  |      | NAC (No Apical Meristem) domain transcriptional regulator superfamily protein | NAC  |
| Pc_TC030074 | 2.19  | 0.05  |      | 2.64  | 0.03 | Up   | 1.44  | 0.4  |      | 2.13  | 0.08  |      | zinc ion binding                                                              |      |
| Pc_TC030075 | 2.61  | 0.02  | Up   | 3.29  | 0    | Up   | -0.82 | 0.8  |      | 1.47  | 0.32  |      | K-box region and MADS-box transcription factor family protein                 | MADS |
| Pc_TC030076 | 3     | 0.01  | Up   | 2.06  | 0.14 |      | 2.57  | 0.1  |      | 3.35  | 0     | Up   | K-box region and MADS-box transcription factor family protein                 | MADS |
| Pc_TC030081 | -1.1  | 0.24  |      | 0.18  | 0.88 |      | 2.83  | 0.01 | Up   | 1.9   | 0.02  | Up   | Protein of unknown function (DUF630 and DUF632)                               |      |
| Pc_TC030093 | 0.22  | 0.87  |      | 2.2   | 0.01 | Up   | -0.16 | 0.95 |      | 0.9   | 0.37  |      | Heat shock protein 70 (Hsp 70) family protein                                 |      |
| Pc_TC030103 | 1.43  | 0.16  |      | 2.48  | 0.01 | Up   | 2.49  | 0.06 |      | 2.74  | 0     | Up   | Major facilitator superfamily protein                                         |      |
| Pc_TC030120 | 0.18  | 0.76  |      | -1.59 | 0.03 | Down | -0.69 | 0.52 |      | 0.38  | 0.57  |      | like COV 2                                                                    |      |
| Pc_TC030160 | -1.48 | 0.07  |      | -2.24 | 0.02 | Down | 3.11  | 0    | Up   | 1.13  | 0.14  |      | Eukaryotic protein of unknown function (DUF914)                               |      |
| Pc_TC030161 | -0.85 | 0.32  |      | -0.75 | 0.45 |      | 3.49  | 0    | Up   | 1.13  | 0.16  |      | Eukaryotic protein of unknown function (DUF914)                               |      |
| Pc_TC030162 | 1.66  | 0.48  |      | 0.64  | 0.98 |      | 4.39  | 0.01 | Up   | 2.63  | 0.14  |      | Eukaryotic protein of unknown function (DUF914)                               |      |
| Pc_TC030185 | 0.08  | 1     |      | 2.61  | 0.02 | Up   | -3.5  | 0.19 |      | -1.37 | 0.47  |      | Adenine nucleotide alpha hydrolases-like superfamily protein                  |      |
| Pc_TC030187 | -0.05 | 0.93  |      | 0.12  | 0.85 |      | -3.93 | 0    | Down | -3.64 | ##### | Down | Adenine nucleotide alpha hydrolases-like superfamily protein                  |      |
| Pc_TC030201 | -2.7  | 0.01  | Down | -1    | 0.29 |      | 0.41  | 0.73 |      | -0.53 | 0.56  |      | NAD(P)-linked oxidoreductase superfamily protein                              |      |
| Pc_TC030202 | 0.53  | 0.6   |      | 0.76  | 0.48 |      | 2.93  | 0.01 | Up   | 1.33  | 0.16  |      | NAD(P)-linked oxidoreductase superfamily protein                              |      |
| Pc_TC030205 | 1.36  | 0.03  | Up   | 1.17  | 0.11 |      | -0.17 | 0.89 |      | 0.47  | 0.55  |      | unknown protein                                                               |      |
| Pc_TC030207 | 0.84  | 0.14  |      | 1.92  | 0    | Up   | -2.23 | 0.06 |      | -0.34 | 0.65  |      | highly ABA-induced PP2C gene 3                                                |      |
| Pc_TC030225 | 0.1   | 0.91  |      | 1.67  | 0.02 | Up   | -0.32 | 0.79 |      | -0.55 | 0.52  |      | Histone superfamily protein                                                   |      |
| Pc_TC030244 | 0.88  | 0.08  |      | 0.56  | 0.37 |      | -3.3  | 0.01 | Down | -0.49 | 0.48  |      | Expressed protein                                                             |      |
| Pc_TC030249 | -2.02 | 0.06  |      | -2.85 | 0.03 | Down | -1.23 | 0.37 |      | -1.58 | 0.15  |      | Halocacid dehalogenase-like hydrolase (HAD) superfamily protein               |      |
| Pc_TC030263 | 2.03  | 0     | Up   | 0.92  | 0.25 |      | 0.1   | 0.95 |      | 0.18  | 0.84  |      | Leucine-rich repeat protein kinase family protein                             |      |
| Pc_TC030272 | 0.72  | 0.39  |      | 2.48  | 0    | Up   | 0.14  | 0.94 |      | 1.19  | 0.18  |      | WRKY DNA-binding protein 33                                                   | WRKY |
| Pc_TC030275 | 0.52  | 0.07  |      | -0.09 | 0.81 |      | -2.27 | 0.01 | Down | 0.1   | 0.84  |      | PYRIMIDINE 4                                                                  |      |
| Pc_TC030287 | -0.35 | 0.56  |      | -0.33 | 0.64 |      | 2.17  | 0.03 | Up   | 1.04  | 0.12  |      | Leucine-rich repeat protein kinase family protein                             |      |
| Pc_TC030291 | -0.65 | 0.29  |      | -2.04 | 0.01 | Down | 1.52  | 0.13 |      | 0.31  | 0.67  |      | NB-ARC domain-containing disease resistance protein                           |      |
| Pc_TC030303 | -0.93 | 0.01  |      | -0.7  | 0.14 |      | -2.32 | 0.01 | Down | -1.83 | 0     | Down | RNA-binding KH domain-containing protein                                      |      |
| Pc_TC030304 | 0.06  | 0.9   |      | 1.22  | 0.01 | Up   | -0.04 | 0.96 |      | 0.21  | 0.72  |      | RNA-binding KH domain-containing protein                                      |      |
| Pc_TC030305 | 1.96  | ##### | Up   | 1.25  | 0.01 | Up   | -0.5  | 0.59 |      | 1.43  | 0.01  | Up   | RNA-binding KH domain-containing protein                                      |      |
| Pc_TC030313 | 0.49  | 0.2   |      | 0.37  | 0.45 |      | 0.87  | 0.32 |      | 1.52  | 0     | Up   | Leucine-rich repeat protein kinase family protein                             |      |
| Pc_TC030345 | 0.05  | 0.92  |      | 0.15  | 0.81 |      | -1.77 | 0.09 |      | -1.65 | 0.02  | Down | nodulin MtN21 /EamA-like transporter family protein                           |      |
| Pc_TC030362 | 0.96  | 0.02  |      | 1.17  | 0.02 | Up   | -1.3  | 0.19 |      | -0.36 | 0.55  |      | beta-1,3-glucanase 2                                                          |      |
| Pc_TC030366 | -0.37 | 0.21  |      | -0.98 | 0.01 |      | 1.89  | 0.03 | Up   | 0.99  | 0.04  |      | phosphoglycerate kinase 1                                                     |      |
| Pc_TC030388 | 0.82  | 0.14  |      | 1.38  | 0.03 | Up   | -0.84 | 0.44 |      | -0.04 | 0.97  |      | HSP20-like chaperones superfamily protein                                     |      |
| Pc_TC030393 | -3.17 | 0.04  | Down | -1.19 | 0.38 |      | -3.16 | 0.08 |      | -1.82 | 0.16  |      | Outer arm dynein light chain 1 protein                                        |      |
| Pc_TC030404 | -3.73 | 0.05  | Down | -1.43 | 0.37 |      | -2.72 | 0.16 |      | -3.18 | 0.06  |      | Uncharacterized protein                                                       |      |
| Pc_TC030426 | 0.86  | 0.34  |      | 2.25  | 0.01 | Up   | -0.5  | 0.75 |      | 0.14  | 0.94  |      | plasmodesmata callose-binding protein 3                                       |      |
| Pc_TC030434 | 0.24  | 0.42  |      | 0.54  | 0.16 |      | -1.31 | 0.12 |      | -1.18 | 0.02  | Down | CBL-interacting protein kinase 12                                             |      |
| Pc_TC030445 | 0.42  | 0.62  |      | -0.03 | 1    |      | 1.6   | 0.17 |      | 1.63  | 0.05  | Up   | Acyl-CoA N-acyltransferases (NAT) superfamily protein                         | GNAT |
| Pc_TC030448 | -0.28 | 0.61  |      | -0.48 | 0.47 |      | 2.03  | 0.03 | Up   | 0.62  | 0.34  |      | RAB GTPase homolog A1B                                                        |      |
| Pc_TC030450 | -0.9  | 0.26  |      | -0.11 | 0.92 |      | -2.11 | 0.1  |      | -1.91 | 0.04  | Down | Protein of unknown function (DUF300)                                          |      |
| Pc_TC030462 | 1.66  | 0.05  | Up   | 1.56  | 0.11 |      | 0.59  | 0.69 |      | 1.71  | 0.07  |      | periodic tryptophan protein 2                                                 |      |
| Pc_TC030463 | -1.33 | 0.02  | Down | -0.83 | 0.2  |      | -0.28 | 0.78 |      | -0.12 | 0.86  |      | Class I glutamine amidotransferase-like superfamily protein                   |      |
| Pc_TC030466 | 0.26  | 0.53  |      | 1.33  | 0.01 | Up   | -3.12 | 0    | Down | -2.06 | 0     | Down | heat shock protein 101                                                        |      |
| Pc_TC030470 | 0.82  | 0.79  |      | 0.06  | 1    |      | 4.03  | 0.01 | Up   | 2.13  | 0.19  |      | RING/U-box superfamily protein                                                |      |
| Pc_TC030477 | 0.98  | 0.11  |      | 1.85  | 0.01 | Up   | -1.04 | 0.37 |      | -0.34 | 0.68  |      | ATP-dependent protease La (LON) domain protein                                |      |
| Pc_TC030479 | -3.92 | 0.03  | Down | -0.77 | 0.6  |      | 0.93  | 0.5  |      | 0.63  | 0.58  |      | Pectin lyase-like superfamily protein                                         |      |
| Pc_TC030482 | 0.65  | 0.06  |      | 1.01  | 0.02 | Up   | -0.47 | 0.59 |      | 0.91  | 0.08  |      | Protein kinase family protein with leucine-rich repeat domain                 |      |
| Pc_TC030496 | 0.62  | 0.06  |      | 0.8   | 0.06 |      | -2.13 | 0.02 | Down | -1.02 | 0.05  |      | F-box family protein                                                          |      |
| Pc_TC030499 | 3.45  | 0     | Up   | 4.54  | 0    | Up   | 1.09  | 0.69 |      | 3.36  | 0.01  | Up   | UDP-Glycosyltransferase superfamily protein                                   |      |
| Pc_TC030503 | 1.3   | 0.04  | Up   | 2.06  | 0    | Up   | 0.31  | 0.79 |      | -0.52 | 0.54  |      | respiratory burst oxidase protein F                                           |      |
| Pc_TC030517 | 1.34  | 0.04  | Up   | 1.76  | 0.02 | Up   | -0.17 | 0.9  |      | 0.5   | 0.56  |      | Protein of unknown function, DUF584                                           |      |
| Pc_TC030527 | -0.65 | 0.1   |      | -1.11 | 0.03 | Down | 0.9   | 0.3  |      | 0.59  | 0.27  |      | starch synthase 4                                                             |      |
| Pc_TC030529 | 1.79  | 0.04  | Up   | 0.25  | 0.89 |      | 0.45  | 0.79 |      | 0.57  | 0.64  |      | starch synthase 4                                                             |      |
| Pc_TC030530 | -1.54 | 0.04  | Down | -2.18 | 0.02 | Down | -2.01 | 0.1  |      | -3.24 | 0     | Down | starch synthase 4                                                             |      |
| Pc_TC030549 | 0.42  | 0.15  |      | 0.58  | 0.12 |      | -2.75 | 0    | Down | -1.1  | 0.03  | Down | homology to ABI1                                                              |      |
| Pc_TC030550 | 0.34  | 0.25  |      | 0.51  | 0.17 |      | -2.35 | 0.01 | Down | -0.92 | 0.06  |      | homology to ABI1                                                              |      |
| Pc_TC030551 | 2.97  | 0     | Up   | 3.25  | 0    | Up   | 0.4   | 0.89 |      | 0.91  | 0.54  |      | Putative uncharacterized protein OSJNBa0052K01.11                             |      |
| Pc_TC030576 | 0.39  | 0.23  |      | 0.6   | 0.14 |      | -2.29 | 0.01 | Down | -0.74 | 0.15  |      | alpha/beta-Hydrolases superfamily protein                                     |      |

|             |       |      |      |       |           |      |       |           |      |       |       |      |                                                                             |               |
|-------------|-------|------|------|-------|-----------|------|-------|-----------|------|-------|-------|------|-----------------------------------------------------------------------------|---------------|
| Pc_TC030577 | 0.4   | 0.32 |      | 0.75  | 0.13      |      | -2.15 | 0.03      | Down | -0.85 | 0.15  |      | alpha/beta-Hydrolases superfamily protein                                   |               |
| Pc_TC030578 | -0.09 | 0.9  |      | 1.14  | 0.09      |      | -1.86 | 0.11      |      | -1.88 | 0.02  | Down | alpha/beta-Hydrolases superfamily protein                                   |               |
| Pc_TC030580 | 0.75  | 0.15 |      | 0.91  | 0.15      |      | -1.64 | 0.13      | Down | -1.69 | 0.02  | Down | Expressed protein                                                           |               |
| Pc_TC030581 | 0.88  | 0.13 |      | 2.29  | 0         | Up   | -3.48 | 0.01      | Down | -1.25 | 0.11  |      | Late embryogenesis abundant protein (LEA) family protein                    |               |
| Pc_TC030583 | 0.73  | 0.02 |      | 1.76  | 5.30E-006 | Up   | -3.31 | 0         | Down | -1.5  | 0     | Down | Late embryogenesis abundant protein (LEA) family protein                    |               |
| Pc_TC030594 | 1.15  | 0.09 |      | 2.55  | 0         | Up   | -5.05 | 0         | Down | -2.76 | 0.01  | Down | mitogen-activated protein kinase kinase kinase 17                           |               |
| Pc_TC030595 | 0.37  | 0.62 |      | 1.2   | 0.12      |      | -4.11 | 0.01      | Down | -1.99 | 0.04  | Down | mitogen-activated protein kinase kinase kinase 15                           |               |
| Pc_TC030600 | -3.49 | 0    | Down | -1.45 | 0.1       |      | 3.09  | 0         | Up   | 1.67  | 0.02  | Up   | S-adenosyl-L-methionine-dependent methyltransferases superfamily protein    |               |
| Pc_TC030602 | -0.66 | 0.09 |      | -1.14 | 0.03      | Down | 1.1   | 0.2       |      | 0.65  | 0.22  |      | Pyridoxal-5'-phosphate-dependent enzyme family protein                      |               |
| Pc_TC030605 | 0.27  | 0.44 |      | 0.43  | 0.34      |      | -2.17 | 0.02      | Down | -1.18 | 0.03  | Down | lipid-transfer protein/seed storage 2S albumin superfamily protein          |               |
| Pc_TC030613 | -0.1  | 0.95 |      | -1.16 | 0.27      |      | -4.63 | 0.01      | Down | -2.04 | 0.06  |      | isopentenyltransferase 1                                                    |               |
| Pc_TC030637 | -0.06 | 0.84 |      | -0.54 | 0.19      |      | 2.7   | 0         | Up   | 1.39  | 0.01  | Up   | NADH-dependent glutamate synthase 1                                         |               |
| Pc_TC030648 | 0.63  | 0.16 |      | 1.17  | 0.03      | Up   | -3.09 | 0         | Down | -2.74 | 0     | Down | Eukaryotic aspartyl protease family protein                                 |               |
| Pc_TC030661 | -0.64 | 0.15 |      | -0.5  | 0.36      |      | 0.29  | 0.76      |      | -1.2  | 0.05  | Down | photosystem I subunit H2                                                    |               |
| Pc_TC030662 | 0.85  | 0.06 |      | 0.91  | 0.1       |      | 1.66  | 0.08      |      | 1.27  | 0.03  | Up   | photosystem I subunit H2                                                    |               |
| Pc_TC030671 | 0.8   | 0.07 |      | 1.43  | 0.01      | Up   | -1.12 | 0.26      |      | -0.16 | 0.79  |      | DNAJ heat shock family protein                                              |               |
| Pc_TC030676 | -0.63 | 0.61 |      | -1.53 | 0.28      |      | -2.08 | 0.21      |      | -3.54 | 0.03  | Down | auxin response factor 4                                                     |               |
| Pc_TC030682 | 0.13  | 0.84 |      | 0.18  | 0.81      |      | 2.44  | 0.02      | Up   | 1.26  | 0.07  |      | FASCICLIN-like arabinogalactan protein 13 precursor                         |               |
| Pc_TC030701 | -0.51 | 0.35 |      | -1.71 | 0.01      | Down | 2.22  | 0.02      | Up   | 1.45  | 0.02  | Up   | 16S rRNA processing protein RimM family                                     |               |
| Pc_TC030706 | 0.29  | 0.36 |      | 0.21  | 0.6       |      | -2.26 | 0.01      | Down | -1.57 | 0     | Down | COLD REGULATED 314 INNER MEMBRANE 1                                         |               |
| Pc_TC030709 | -1.04 | 0.17 |      | -1.26 | 0.16      |      | 2.35  | 0.03      | Up   | 1.4   | 0.06  |      | RNA binding;GTP binding                                                     |               |
| Pc_TC030723 | 0.32  | 0.29 |      | 0.33  | 0.39      |      | -1.74 | 0.04      | Down | -1    | 0.04  | Down | G-box binding factor 3                                                      | bZIP          |
| Pc_TC030733 | 0.25  | 0.87 |      | 0.45  | 0.73      |      | 1.69  | 0.19      |      | 2.18  | 0.02  | Up   | unknown protein                                                             |               |
| Pc_TC030735 | 0.33  | 0.44 |      | 0.54  | 0.3       |      | -3.74 | 0         | Down | -2.07 | 0     | Down | Protein phosphatase 2C family protein                                       |               |
| Pc_TC030742 | 0.49  | 0.36 |      | 1.66  | 0.01      | Up   | -0.25 | 0.81      |      | -0.21 | 0.77  |      | Histone superfamily protein                                                 | CCAAT         |
| Pc_TC030747 | 0.77  | 0.09 |      | 2.14  | 3.75E-005 | Up   | -3.78 | 0         | Down | -1.26 | 0.06  |      | 3-ketoacyl-CoA synthase 11                                                  |               |
| Pc_TC030752 | 1     | 0.39 |      | 2.71  | 0.01      | Up   | 0     | 0.05      |      | -1.37 | 0.41  |      | Putative uncharacterized protein OJ1268 B08.18                              |               |
| Pc_TC030768 | -1.26 | 0.12 |      | -0.41 | 0.65      |      | 4.11  | 0         | Up   | 2.03  | 0.01  | Up   | Pectin lyase-like superfamily protein                                       |               |
| Pc_TC030783 | 0.42  | 0.51 |      | 2.36  | 0         | Up   | 0     | 1.42E-005 |      | -1.54 | 0.06  |      | serine carboxypeptidase-like 50                                             |               |
| Pc_TC030794 | -0.29 | 0.66 |      | -2.49 | 0         | Down | 1.71  | 0.1       |      | 0.96  | 0.17  |      | P-loop containing nucleoside triphosphate hydrolases superfamily protein    |               |
| Pc_TC030807 | 0.55  | 0.17 |      | 1.34  | 0.01      | Up   | -0.25 | 0.78      |      | -0.35 | 0.55  |      | sigma factor E                                                              | Sigma7NA-like |
| Pc_TC030808 | 1.02  | 0.16 |      | 1.5   | 0.06      |      | -1.2  | 0.36      |      | -2.49 | 0.02  | Down | sigma factor E                                                              | Sigma7NA-like |
| Pc_TC030816 | 0.61  | 0.48 |      | 2.31  | 0         | Up   | -0.39 | 0.79      |      | 0.94  | 0.3   |      | Leucine-rich repeat protein kinase family protein                           |               |
| Pc_TC030823 | -1    | 0.26 |      | 0.26  | 0.79      |      | 2.26  | 0.04      | Up   | 1.29  | 0.11  |      | Protein kinase protein with adenine nucleotide alpha hydrolases-like domain |               |
| Pc_TC030824 | -0.71 | 0.31 |      | -0.13 | 0.88      |      | 2.34  | 0.02      | Up   | 1.62  | 0.02  | Up   | Protein kinase protein with adenine nucleotide alpha hydrolases-like domain |               |
| Pc_TC030825 | 0.98  | 0.25 |      | 0.74  | 0.46      |      | 2.57  | 0.03      | Up   | 1.53  | 0.09  |      | Protein kinase protein with adenine nucleotide alpha hydrolases-like domain |               |
| Pc_TC030840 | 0.28  | 0.65 |      | -1.88 | 0.02      | Down | -0.41 | 0.71      |      | -2.64 | 0     | Down | damaged DNA binding protein 1A                                              |               |
| Pc_TC030845 | 0.89  | 0.04 |      | 1.33  | 0.01      | Up   | -0.73 | 0.45      |      | -0.04 | 0.95  |      | DCD (Development and Cell Death) domain protein                             |               |
| Pc_TC030847 | -0.51 | 0.4  |      | 0.07  | 0.93      |      | 1.92  | 0.05      |      | 1.7   | 0.01  | Up   | unknown protein                                                             |               |
| Pc_TC030848 | -0.91 | 0.09 |      | -0.65 | 0.31      |      | 2.4   | 0.01      | Up   | 1.12  | 0.07  |      | unknown protein                                                             |               |
| Pc_TC030851 | 0.33  | 0.26 |      | 0.19  | 0.6       |      | -4.69 | 9.09E-007 | Down | -2.77 | ##### | Down | UDP-D-glucose/UDP-D-galactose 4-epimerase 2                                 |               |
| Pc_TC030852 | 0.62  | 0.22 |      | 0.31  | 0.62      |      | -3.52 | 0         | Down | -3.1  | ##### | Down | UDP-D-glucose/UDP-D-galactose 4-epimerase 2                                 |               |
| Pc_TC030867 | -0.13 | 0.98 |      | -0.26 | 0.89      |      | -4.4  | 0.05      | Down | 0.3   | 0.83  |      | unknown protein                                                             |               |
| Pc_TC030899 | -0.94 | 0.08 |      | -0.58 | 0.36      |      | 2.39  | 0.01      | Up   | 1.59  | 0.01  | Up   | nodulin MtN21 /EamA-like transporter family protein                         |               |
| Pc_TC030903 | -0.54 | 0.36 |      | -0.64 | 0.37      |      | 2.47  | 0.01      | Up   | 0.36  | 0.61  |      | ent-kaurenoic acid hydroxylase 2                                            |               |
| Pc_TC030907 | 0.17  | 0.69 |      | -0.34 | 0.54      |      | -2.39 | 0.02      | Down | -1.86 | 0     | Down | 6-phosphogluconate dehydrogenase family protein                             |               |
| Pc_TC030926 | 1.08  | 0.77 |      | 3.38  | 0.04      | Up   | -0.5  | 1         |      | -1.37 | 0.88  |      | Uncharacterized protein                                                     |               |
| Pc_TC030946 | 0.35  | 0.63 |      | -2.02 | 0.04      | Down | 1.25  | 0.26      |      | 0.52  | 0.51  |      | RING/U-box superfamily protein                                              |               |
| Pc_TC030947 | -1.4  | 0.04 | Down | -1.1  | 0.16      |      | 1     | 0.34      |      | -0.02 | 0.99  |      | RING/U-box superfamily protein                                              |               |
| Pc_TC030950 | -1.14 | 0.04 | Down | -0.57 | 0.37      |      | 1.71  | 0.07      |      | 0.31  | 0.63  |      | BCL-2-associated athanogene 1                                               |               |
| Pc_TC030953 | 0.14  | 0.8  |      | 1.12  | 0.07      |      | -4.76 | 0         | Down | -3.22 | ##### | Down | Uncharacterized protein                                                     |               |
| Pc_TC030958 | 1.23  | 0.01 | Up   | -0.11 | 0.86      |      | -1.29 | 0.22      |      | -0.21 | 0.75  |      | LMBR1-like membrane protein                                                 |               |
| Pc_TC030976 | 1.02  | 0.05 | Up   | 1.53  | 0.01      | Up   | -0.21 | 0.85      |      | 0.33  | 0.62  |      | cytochrome P450, family 704, subfamily A, polypeptide 2                     |               |
| Pc_TC030998 | 0.69  | 0.02 |      | 0.56  | 0.14      |      | -0.01 | 0.98      |      | 1.17  | 0.02  | Up   | RNA 3'-terminal phosphate cyclase/enolpyruvate transferase, alpha/beta      |               |
| Pc_TC031002 | -0.14 | 0.94 |      | 0.47  | 0.68      |      | 2.82  | 0.02      | Up   | 1.32  | 0.16  |      | Leucine-rich repeat protein kinase family protein                           |               |
| Pc_TC031011 | 1.08  | 0.65 |      | 0.06  | 1         |      | 3.7   | 0.02      | Up   | 1.85  | 0.29  |      | armadillo repeat kinesin 3                                                  |               |
| Pc_TC031021 | 0.03  | 0.97 |      | 0.39  | 0.55      |      | -1.8  | 0.1       |      | -1.54 | 0.04  | Down | HAD superfamily, subfamily IIIB acid phosphatase                            |               |
| Pc_TC031030 | 0.76  | 0.33 |      | 1.96  | 0.01      | Up   | -0.79 | 0.56      |      | -0.96 | 0.35  |      | early nodulin-related                                                       |               |
| Pc_TC031031 | 1.3   | 0.02 | Up   | 1.82  | 0         | Up   | 1.6   | 0.12      |      | 0.76  | 0.27  |      | Uncharacterized protein                                                     |               |
| Pc_TC031035 | 1.08  | 0.51 |      | 2.91  | 0.02      | Up   | 1.5   | 0.4       |      | 1.63  | 0.26  |      | 1-deoxy-D-xylulose 5-phosphate synthase 3                                   |               |
| Pc_TC031040 | 1.05  | 0.2  |      | 1.17  | 0.2       |      | 2.31  | 0.05      | Up   | 1.41  | 0.11  |      | Tetratricopeptide repeat (TPR)-like superfamily protein                     |               |
| Pc_TC031055 | 1.4   | 0.04 | Up   | 2.31  | 0         | Up   | -5.82 | 0         | Down | -1.7  | 0.09  |      | Os06g0147000 protein                                                        |               |

|             |       |      |      |       |      |      |  |       |      |      |       |       |      |                                                                          |     |
|-------------|-------|------|------|-------|------|------|--|-------|------|------|-------|-------|------|--------------------------------------------------------------------------|-----|
| Pc_TC031056 | 0.38  | 0.47 |      | 0.28  | 0.67 |      |  | -2.69 | 0.02 | Down | -2.27 | 0     | Down | Putative uncharacterized protein                                         |     |
| Pc_TC031062 | 1.17  | 0.35 |      | 2.58  | 0.02 | Up   |  | -0.69 | 0.77 |      | 2.08  | 0.06  |      | GDSL-like Lipase/Acylhydrolase superfamily protein                       |     |
| Pc_TC031095 | 0.36  | 0.65 |      | 1.58  | 0.04 | Up   |  | -0.95 | 0.46 |      | 1.08  | 0.19  |      | Hydrolase-like protein family                                            |     |
| Pc_TC031140 | -0.98 | 0.09 |      | -1.44 | 0.04 | Down |  | 0.5   | 0.62 |      | -0.39 | 0.57  |      | lectin protein kinase family protein                                     |     |
| Pc_TC031141 | 0.69  | 0.24 |      | 1.91  | 0    | Up   |  | 0.71  | 0.5  |      | 0.62  | 0.39  |      | S-adenosyl-L-methionine-dependent methyltransferases superfamily protein |     |
| Pc_TC031176 | -0.45 | 0.47 |      | -0.14 | 0.85 |      |  | 2.69  | 0.01 | Up   | 2.35  | 0     | Up   | glucuronidase 3                                                          |     |
| Pc_TC031177 | -0.13 | 0.84 |      | 0.49  | 0.46 |      |  | 2.28  | 0.02 | Up   | 2.08  | 0     | Up   | glucuronidase 3                                                          |     |
| Pc_TC031198 | 0.08  | 0.94 |      | -0.18 | 0.86 |      |  | -3.05 | 0.03 | Down | -0.85 | 0.34  |      | actin binding                                                            |     |
| Pc_TC031199 | 0.73  | 0.5  |      | 3.31  | 0    | Up   |  | -1.13 | 0.51 |      | -0.37 | 0.81  |      | Low temperature and salt responsive protein family                       |     |
| Pc_TC031207 | -0.89 | 0.08 |      | -2.12 | 0    | Down |  | 0.38  | 0.69 |      | -0.31 | 0.63  |      | serine carboxypeptidase-like 29                                          |     |
| Pc_TC031223 | -0.8  | 0.48 |      | -3.4  | 0.03 | Down |  | 0.95  | 0.46 |      | 0.81  | 0.41  |      | glutamate receptor 2.6                                                   |     |
| Pc_TC031232 | 0.85  | 0.23 |      | 1.8   | 0.02 | Up   |  | -1.24 | 0.33 |      | 0.73  | 0.38  |      | RING/U-box superfamily protein                                           |     |
| Pc_TC031238 | -1.52 | 0.03 | Down | -1.38 | 0.09 |      |  | 0.35  | 0.75 |      | 0     | 1     |      | unknown protein                                                          |     |
| Pc_TC031245 | 0.25  | 0.77 |      | 1.66  | 0.03 | Up   |  | -1.73 | 0.2  |      | -0.61 | 0.53  |      | Chaperone DnaJ-domain superfamily protein                                |     |
| Pc_TC031248 | -0.44 | 0.46 |      | 0.06  | 0.94 |      |  | 2     | 0.04 | Up   | 1.3   | 0.05  | Up   | Thioredoxin superfamily protein                                          |     |
| Pc_TC031264 | 0.5   | 0.11 |      | 0.84  | 0.03 |      |  | -2.05 | 0.02 | Down | -0.97 | 0.06  |      | Chalcone-flavanone isomerase family protein                              |     |
| Pc_TC031265 | 0.31  | 0.45 |      | 0.55  | 0.27 |      |  | -2.23 | 0.02 | Down | -0.35 | 0.54  |      | Chalcone-flavanone isomerase family protein                              |     |
| Pc_TC031281 | 0.91  | 0.22 |      | 1.86  | 0.02 | Up   |  | -0.06 | 0.98 |      | -0.58 | 0.55  |      | Concanavalin A-like lectin protein kinase family protein                 |     |
| Pc_TC031298 | 0.61  | 0.55 |      | 2.19  | 0.02 | Up   |  | -0.21 | 0.92 |      | 0.74  | 0.48  |      | alpha/beta-Hydrolases superfamily protein                                |     |
| Pc_TC031300 | 0.74  | 0.27 |      | 1.71  | 0.02 | Up   |  | -3.08 | 0.02 | Down | -0.13 | 0.89  |      | Putative Mutator protein                                                 |     |
| Pc_TC031305 | 1.6   | 0.15 |      | 2.27  | 0.04 | Up   |  | -0.69 | 0.77 |      | 0.87  | 0.54  |      | 12-oxophytodienoate reductase 2                                          |     |
| Pc_TC031306 | 1.12  | 0.01 | Up   | 1.53  | 0    | Up   |  | -1.11 | 0.27 |      | -0.07 | 0.92  |      | 12-oxophytodienoate reductase 1                                          |     |
| Pc_TC031309 | 1.22  | 0.27 |      | 3.15  | 0    | Up   |  | 0.18  | 0.97 |      | 0.47  | 0.76  |      | Cupredoxin superfamily protein                                           |     |
| Pc_TC031336 | 0.36  | 0.39 |      | 0.59  | 0.25 |      |  | -3.27 | 0    | Down | -0.96 | 0.12  |      | Protein of unknown function (DUF581)                                     |     |
| Pc_TC031345 | 0.82  | 0.06 |      | 1.37  | 0.01 | Up   |  | -1.45 | 0.15 |      | 2     | 0     | Up   | shikimate kinase 1                                                       |     |
| Pc_TC031346 | 1.84  | 0    | Up   | 2.07  | 0    | Up   |  | -2.69 | 0.04 | Down | 2.05  | 0.01  | Up   | shikimate kinase 1                                                       |     |
| Pc_TC031398 | 4.08  | 0.02 | Up   | 4.31  | 0.02 | Up   |  | 1.83  | 0.66 |      | 0.63  | 1     |      | Concanavalin A-like lectin protein kinase family protein                 |     |
| Pc_TC031399 | 0.26  | 0.71 |      | 0.08  | 0.94 |      |  | -2.96 | 0.03 | Down | -0.46 | 0.58  |      | S-adenosyl-L-methionine-dependent methyltransferases superfamily protein |     |
| Pc_TC031404 | 1.08  | 0.77 |      | 3.31  | 0.04 | Up   |  | 1.31  | 0.68 |      | 1.43  | 0.58  |      | S-adenosyl-L-methionine-dependent methyltransferases superfamily protein |     |
| Pc_TC031411 | 0.33  | 0.28 |      | 0.32  | 0.42 |      |  | -3.25 | 0    | Down | -1.21 | 0.02  | Down | Thiamin diphosphate-binding fold (THDP-binding) superfamily protein      |     |
| Pc_TC031414 | -0.41 | 0.24 |      | -1.22 | 0.01 | Down |  | 0.54  | 0.52 |      | 0.33  | 0.52  |      | Phosphofructokinase family protein                                       |     |
| Pc_TC031423 | 0.9   | 0.01 |      | 0.92  | 0.04 |      |  | -1.92 | 0.04 | Down | 0.01  | 0.99  |      | STELAR K+ outward rectifier                                              |     |
| Pc_TC031431 | -1.03 | 0    | Down | 0.45  | 0.28 |      |  | 0.21  | 0.81 |      | 0.1   | 0.85  |      | P-loop containing nucleoside triphosphate hydrolases superfamily protein |     |
| Pc_TC031473 | 1.06  | 0.02 | Up   | 0.14  | 0.82 |      |  | 0.59  | 0.54 |      | 0.64  | 0.3   |      | Peroxidase superfamily protein                                           |     |
| Pc_TC031479 | 1.45  | 0    | Up   | 2.13  | 0    | Up   |  | 1.05  | 0.3  |      | 0.94  | 0.15  |      | Transmembrane amino acid transporter family protein                      |     |
| Pc_TC031480 | 0     | 0.99 |      | 0.12  | 0.81 |      |  | -2.85 | 0    | Down | -0.02 | 0.97  |      | Transmembrane amino acid transporter family protein                      |     |
| Pc_TC031482 | -0.85 | 0.02 |      | -1.05 | 0.03 | Down |  | 1.29  | 0.13 |      | 0.41  | 0.43  |      | DNA topoisomerase,type IA,core                                           |     |
| Pc_TC031487 | -1.28 | 0.05 |      | 0.17  | 0.82 |      |  | -0.05 | 0.97 |      | -1.57 | 0.04  | Down | Protein kinase superfamily protein                                       |     |
| Pc_TC031503 | -2.98 | 0.02 | Down | -0.78 | 0.51 |      |  | -0.5  | 0.74 |      | -1.02 | 0.36  |      | Uncharacterized protein                                                  |     |
| Pc_TC031519 | 0.69  | 0.27 |      | 1.11  | 0.12 |      |  | -4.55 | 0    | Down | -1.29 | 0.12  |      | unknown protein                                                          |     |
| Pc_TC031524 | -0.13 | 0.79 |      | -1.11 | 0.09 |      |  | 2.65  | 0    | Up   | 1.4   | 0.02  | Up   | aconitase 2                                                              |     |
| Pc_TC031550 | 0.08  | 0.95 |      | -0.33 | 0.74 |      |  | 2.61  | 0.02 | Up   | 1.41  | 0.08  |      | Os06g0316300 protein                                                     |     |
| Pc_TC031551 | 0.14  | 0.63 |      | 0.29  | 0.44 |      |  | -1.28 | 0.13 |      | -1.02 | 0.04  | Down | Uncharacterized protein                                                  |     |
| Pc_TC031562 | 0.65  | 0.08 |      | 0.56  | 0.23 |      |  | -0.25 | 0.78 |      | -1.41 | 0.01  | Down | zinc finger (CCCH-type/C3HC4-type RING finger) family protein            | C3H |
| Pc_TC031566 | 0.87  | 0.39 |      | 2.36  | 0.01 | Up   |  | 0.6   | 0.7  |      | 0.76  | 0.5   |      | Thioredoxin superfamily protein                                          |     |
| Pc_TC031569 | -0.31 | 0.49 |      | -0.33 | 0.55 |      |  | 1.96  | 0.03 | Up   | 0.95  | 0.09  |      | photosystem I light harvesting complex gene 1                            |     |
| Pc_TC031570 | -0.25 | 0.6  |      | -0.07 | 0.91 |      |  | 1.95  | 0.04 | Up   | 1.07  | 0.07  |      | photosystem I light harvesting complex gene 1                            |     |
| Pc_TC031584 | -0.33 | 0.4  |      | -0.79 | 0.12 |      |  | 1.81  | 0.04 | Up   | 0.96  | 0.07  |      | DnaJ/Hsp40 cysteine-rich domain superfamily protein                      |     |
| Pc_TC031595 | 0.29  | 0.32 |      | 0.51  | 0.16 |      |  | -1.81 | 0.03 | Down | -1.19 | 0.02  | Down | phosphoinositide 4-kinase gamma 4                                        |     |
| Pc_TC031596 | -0.69 | 0.04 |      | -0.13 | 0.77 |      |  | -1.26 | 0.15 |      | -2.45 | ##### | Down | phosphoinositide 4-kinase gamma 4                                        |     |
| Pc_TC031597 | 0.33  | 0.25 |      | 0.4   | 0.27 |      |  | -1.88 | 0.03 | Down | -1.46 | 0     | Down | phosphoinositide 4-kinase gamma 4                                        |     |
| Pc_TC031620 | 1.4   | 0    | Up   | 1.04  | 0.09 |      |  | -0.2  | 0.85 |      | 0.91  | 0.16  |      | Uncharacterized protein (Fragment)                                       |     |
| Pc_TC031626 | -0.52 | 0.17 |      | -0.53 | 0.27 |      |  | -0.12 | 0.89 |      | 1.04  | 0.05  | Up   | Alpha amylase family protein                                             |     |
| Pc_TC031639 | -0.92 | 0.38 |      | 0     | 1    |      |  | 3.94  | 0    | Up   | 2.03  | 0.01  | Up   | Protein of Unknown Function (DUF239)                                     |     |
| Pc_TC031652 | 0.24  | 0.47 |      | -0.09 | 0.83 |      |  | -0.77 | 0.37 |      | -1.34 | 0.01  | Down | ARM repeat superfamily protein                                           |     |
| Pc_TC031661 | 0.88  | 0.03 |      | 0.39  | 0.46 |      |  | -0.11 | 0.9  |      | 2.61  | ##### | Up   | formate dehydrogenase                                                    |     |
| Pc_TC031695 | 2.38  | 0    | Up   | 1.36  | 0.13 |      |  | 0.09  | 0.98 |      | 0.81  | 0.39  |      | VIRB2-interacting protein 2                                              |     |
| Pc_TC031700 | -0.24 | 0.69 |      | -0.42 | 0.56 |      |  | 2.29  | 0.02 | Up   | 0.96  | 0.16  |      | Nucleotide/sugar transporter family protein                              |     |
| Pc_TC031704 | -2.06 | 0.1  |      | -0.31 | 0.82 |      |  | -0.96 | 0.52 |      | -3.25 | 0.02  | Down | Plant thionin                                                            |     |
| Pc_TC031730 | -1.08 | 0.2  |      | -2.1  | 0.04 | Down |  | 0.28  | 0.82 |      | 0.24  | 0.79  |      | Protein phosphatase 2C family protein                                    |     |
| Pc_TC031737 | 1.08  | 0.28 |      | 1.95  | 0.05 | Up   |  | -0.06 | 1    |      | 1.88  | 0.05  |      | Putative uncharacterized protein B1018E06.51                             |     |
| Pc_TC031768 | 0.34  | 0.43 |      | 0.83  | 0.11 |      |  | -3.68 | 0    | Down | -1.2  | 0.06  |      | heat shock transcription factor C1                                       | HSF |

|             |       |       |      |       |           |      |       |           |      |       |      |      |                                                                          |         |
|-------------|-------|-------|------|-------|-----------|------|-------|-----------|------|-------|------|------|--------------------------------------------------------------------------|---------|
| Pc_TC031782 | 1.1   | 0.08  |      | 1.5   | 0.03      | Up   | -0.19 | 0.88      |      | 1.26  | 0.09 |      | Protein kinase family protein with leucine-rich repeat domain            |         |
| Pc_TC031792 | 0.74  | 0.23  |      | 1.44  | 0.04      | Up   | -0.35 | 0.76      |      | -0.12 | 0.89 |      | NAC domain containing protein 75                                         | NAC     |
| Pc_TC031808 | -0.64 | 0.14  |      | -1.09 | 0.05      | Down | -0.3  | 0.75      |      | 0.16  | 0.78 |      | zinc transporter 4 precursor                                             |         |
| Pc_TC031813 | 0.51  | 0.23  |      | 1.05  | 0.04      | Up   | -0.46 | 0.63      |      | 0.18  | 0.76 |      | transmembrane nine 7                                                     |         |
| Pc_TC031821 | -0.26 | 0.71  |      | -1.68 | 0.05      | Down | 0.13  | 0.92      |      | -0.31 | 0.7  |      | GA requiring 3                                                           |         |
| Pc_TC031829 | -0.08 | 0.84  |      | -0.73 | 0.16      |      | 1.48  | 0.09      |      | 1.08  | 0.05 | Up   | S-adenosyl-L-methionine-dependent methyltransferases superfamily protein |         |
| Pc_TC031837 | 0.66  | 0.97  |      | 0.64  | 0.98      |      | 2.75  | 0.18      |      | 3.33  | 0.03 | Up   | cDNA clone:J033145I11,full insert sequence                               |         |
| Pc_TC031838 | -0.71 | 0.56  |      | -2.19 | 0.14      |      | 0.65  | 0.64      |      | -3.04 | 0.04 | Down | OSINBa0059D20.8 protein                                                  |         |
| Pc_TC031839 | 0.43  | 0.78  |      | 1.92  | 0.07      |      | 1.54  | 0.28      |      | 2.07  | 0.04 | Up   | Leucine-rich repeat protein kinase family protein                        |         |
| Pc_TC031847 | 0.54  | 0.26  |      | 0.02  | 0.98      |      | 1.93  | 0.04      | Up   | 2.09  | 0    | Up   | Leucine-rich repeat protein kinase family protein                        |         |
| Pc_TC031848 | -1.33 | 0.04  | Down | -0.57 | 0.44      |      | -0.78 | 0.48      |      | -0.76 | 0.31 |      | poly(A) binding protein 3                                                |         |
| Pc_TC031860 | 0.05  | 0.89  |      | 0.41  | 0.34      |      | -1.68 | 0.06      |      | -1.37 | 0.01 | Down | aldehyde dehydrogenase 2C4                                               |         |
| Pc_TC031873 | -0.31 | 0.48  |      | -0.11 | 0.84      |      | 1.8   | 0.05      | Up   | 0.88  | 0.12 |      | Stabilizer of iron transporter SufD / Polynucleotidyl transferase        |         |
| Pc_TC031876 | -0.36 | 0.44  |      | 1.23  | 0.02      | Up   | 0.34  | 0.71      |      | 0.2   | 0.74 |      | photosystem II reaction center protein B                                 |         |
| Pc_TC031882 | 0.51  | 0.26  |      | 1.1   | 0.04      | Up   | -1.81 | 0.08      |      | -1.57 | 0.02 | Down | RAN GTPase 3                                                             |         |
| Pc_TC031908 | -2.21 | ##### | Down | -2.59 | 3.86E-005 | Down | 2.38  | 0.01      | Up   | 0.69  | 0.23 |      | Aldolase superfamily protein                                             |         |
| Pc_TC031918 | 0.44  | 0.73  |      | 2.03  | 0.04      | Up   | 2     | 0.12      |      | 0.95  | 0.39 |      | Pectin lyase-like superfamily protein                                    |         |
| Pc_TC031920 | -0.87 | 0.14  |      | -0.34 | 0.62      |      | 2.01  | 0.04      | Up   | 0.93  | 0.16 |      | glycine decarboxylase P-protein 1                                        |         |
| Pc_TC031921 | -0.63 | 0.03  |      | -1.71 | 1.11E-005 | Down | 1.82  | 0.04      | Up   | 0.77  | 0.12 |      | glycine decarboxylase P-protein 2                                        |         |
| Pc_TC031924 | 0.44  | 0.29  |      | 0.11  | 0.84      |      | 0.7   | 0.44      |      | 1.26  | 0.03 | Up   | Putative glycosyl hydrolase of unknown function (DUF1680)                |         |
| Pc_TC031935 | -1.49 | 0     | Down | -1.3  | 0.02      | Down | -1.28 | 0.18      |      | -0.83 | 0.16 |      | KH domain-containing protein / zinc finger (CCHC type) family protein    | C3H     |
| Pc_TC031951 | 0.96  | 0.36  |      | 2.9   | 0         | Up   | 0.56  | 0.73      |      | 2.3   | 0.02 | Up   | NAD(P)-binding Rossmann-fold superfamily protein                         |         |
| Pc_TC031953 | -0.05 | 0.97  |      | -0.18 | 0.84      |      | 2.17  | 0.04      | Up   | 1.04  | 0.16 |      | Domain of unknown function (DUF23)                                       |         |
| Pc_TC031968 | 0.5   | 0.2   |      | 1.15  | 0.02      | Up   | -0.97 | 0.3       |      | -0.07 | 0.91 |      | tryptophan synthase beta type 2                                          |         |
| Pc_TC031969 | 2.08  | 0.13  |      | 2.96  | 0.02      | Up   | 0.5   | 0.9       |      | -0.79 | 0.84 |      | tryptophan synthase beta type 2                                          |         |
| Pc_TC031970 | 1.06  | 0.06  |      | 2.11  | 0         | Up   | -1.06 | 0.34      |      | -0.04 | 0.97 |      | tryptophan synthase beta type 2                                          |         |
| Pc_TC031978 | -0.4  | 0.37  |      | -0.54 | 0.33      |      | 2.16  | 0.02      | Up   | 1.01  | 0.07 |      | STRUBBELIG-receptor family 8                                             |         |
| Pc_TC031997 | 0.42  | 0.32  |      | 1.25  | 0.01      | Up   | -0.6  | 0.52      |      | -0.36 | 0.54 |      | SNF7 family protein                                                      |         |
| Pc_TC032000 | -0.14 | 1     |      | 0.25  | 0.97      |      | 3.72  | 0.01      | Up   | 1.57  | 0.21 |      | lipid-transfer protein/seed storage 2S albumin superfamily protein       |         |
| Pc_TC032010 | 0.36  | 0.37  |      | 0.04  | 0.94      |      | 0.96  | 0.28      |      | 1.16  | 0.03 | Up   | S-adenosyl-L-methionine-dependent methyltransferases superfamily protein |         |
| Pc_TC032018 | -1.51 | 0.1   |      | -0.58 | 0.56      |      | -0.98 | 0.44      |      | -2.07 | 0.04 | Down | homogentisate phytyltransferase 1                                        |         |
| Pc_TC032019 | -0.07 | 0.87  |      | -0.65 | 0.21      |      | 1.74  | 0.05      | Up   | 0.82  | 0.13 |      | Ribosomal protein L35                                                    |         |
| Pc_TC032020 | -1.73 | 0.04  | Down | -0.84 | 0.35      |      | 0.17  | 0.9       |      | -1.01 | 0.26 |      | response regulator 10                                                    | G2-like |
| Pc_TC032022 | -0.98 | 0.23  |      | -0.78 | 0.4       |      | 2.2   | 0.04      | Up   | 0.55  | 0.5  |      | alpha/beta-Hydrolases superfamily protein                                |         |
| Pc_TC032035 | 0.64  | 0.04  |      | 0.93  | 0.02      |      | -3.99 | 2.34E-005 | Down | -1.48 | 0    | Down | Chaperone DnaJ-domain superfamily protein                                |         |
| Pc_TC032036 | 0.33  | 0.58  |      | 1     | 0.13      |      | -3.7  | 0         | Down | -2    | 0.01 | Down | Uncharacterized protein                                                  |         |
| Pc_TC032061 | 3.54  | 0.08  |      | 3.06  | 0.22      |      | 4.31  | 0.04      | Up   | 4.15  | 0.02 | Up   | Expressed protein                                                        |         |
| Pc_TC032080 | 0.59  | 0.15  |      | -0.15 | 0.78      |      | -0.92 | 0.34      |      | 1.17  | 0.04 | Up   | basic leucine zipper 9                                                   | bZIP    |
| Pc_TC032087 | -0.16 | 0.82  |      | -0.5  | 0.53      |      | 2.15  | 0.04      | Up   | 1.16  | 0.1  |      | FK506-binding protein 13                                                 |         |
| Pc_TC032107 | -0.92 | 0.03  |      | -1.32 | 0.02      | Down | 1.73  | 0.05      |      | 0.84  | 0.13 |      | toprim domain-containing protein                                         |         |
| Pc_TC032110 | 0.94  | 0.41  |      | 2.43  | 0.02      | Up   | 0.95  | 0.54      |      | -0.13 | 0.99 |      | Glycosyl hydrolases family 31 protein                                    |         |
| Pc_TC032113 | -0.09 | 0.87  |      | 1.26  | 0.03      | Up   | -0.78 | 0.45      |      | -0.65 | 0.33 |      | Glycosyl hydrolases family 31 protein                                    |         |
| Pc_TC032121 | -1.32 | 0.04  | Down | -1.06 | 0.15      |      | 3.31  | 0         | Up   | 1.36  | 0.04 | Up   | SKU5 similar 5                                                           |         |
| Pc_TC032126 | 0.83  | 0.01  |      | 1.64  | 2.42E-005 | Up   | -4.51 | 3.00E-006 | Down | -1.17 | 0.02 | Down | early nodulin-like protein 9                                             |         |
| Pc_TC032127 | -0.53 | 0.59  |      | 0.41  | 0.69      |      | 2.62  | 0.02      | Up   | 1.71  | 0.04 | Up   | Peroxidase superfamily protein                                           |         |
| Pc_TC032134 | 0.78  | 0.07  |      | 0.66  | 0.23      |      | 0.44  | 0.64      |      | -2.02 | 0    | Down | Aldolase-type TIM barrel family protein                                  |         |
| Pc_TC032135 | -2.57 | ##### | Down | -0.71 | 0.25      |      | -1.11 | 0.27      |      | -1.29 | 0.05 |      | Aldolase-type TIM barrel family protein                                  |         |
| Pc_TC032139 | -0.55 | 0.13  |      | -0.86 | 0.06      |      | 1.86  | 0.03      | Up   | 0.81  | 0.11 |      | Translation protein SH3-like family protein                              |         |
| Pc_TC032147 | 2.08  | 0.06  |      | 2.25  | 0.06      |      | 1.78  | 0.25      |      | 2.68  | 0.01 | Up   | auxin response factor 16                                                 | ARF     |
| Pc_TC032152 | 0.38  | 0.69  |      | 0.91  | 0.33      |      | 2.52  | 0.03      | Up   | 1.46  | 0.09 |      | Regulator of Vps4 activity in the MVB pathway protein                    |         |
| Pc_TC032159 | 1.18  | 0.01  | Up   | 0.85  | 0.14      |      | -1.47 | 0.15      |      | 0.32  | 0.62 |      | Barwin-related endoglycanase                                             |         |
| Pc_TC032160 | 0.05  | 0.97  |      | 0.66  | 0.42      |      | -3.03 | 0.03      | Down | -0.91 | 0.32 |      | cysteine-rich RLK (RECEPTOR-like protein kinase) 23                      |         |
| Pc_TC032163 | -0.75 | 0.33  |      | -0.14 | 0.88      |      | -1.59 | 0.2       |      | -1.81 | 0.05 | Down | heavy metal atpase 1                                                     |         |
| Pc_TC032190 | 0.59  | 0.47  |      | 2.27  | 0         | Up   | -0.22 | 0.88      |      | -1.51 | 0.15 |      | xyloglucan endotransglucosylase/hydrolase 25                             |         |
| Pc_TC032195 | 2.68  | 0     | Up   | 2.82  | 0         | Up   | -0.74 | 0.68      |      | 1.73  | 0.09 |      | Uncharacterized protein                                                  |         |
| Pc_TC032200 | -1.59 | 0     | Down | -2.43 | 0         | Down | 0.18  | 0.86      |      | -1.34 | 0.04 | Down | 26S proteasome regulatory subunit S2 1A                                  |         |
| Pc_TC032221 | -1.14 | 0.02  | Down | -1.89 | 0         | Down | 1.73  | 0.06      |      | 0.1   | 0.87 |      | myb-like HTH transcriptional regulator family protein                    | G2-like |
| Pc_TC032228 | 0.42  | 0.3   |      | 0.7   | 0.16      |      | 1.51  | 0.09      |      | 1.1   | 0.05 | Up   | Aldolase superfamily protein                                             |         |
| Pc_TC032235 | -0.35 | 0.37  |      | -1.13 | 0.03      | Down | 1.62  | 0.06      |      | 0.97  | 0.07 |      | chloroplast thylakoid lumen protein                                      |         |
| Pc_TC032255 | -0.92 | 0.38  |      | -1.47 | 0.22      |      | -1.29 | 0.37      |      | -3.49 | 0.01 | Down | Uncharacterized protein                                                  |         |
| Pc_TC032262 | 0.56  | 0.69  |      | 2.41  | 0.02      | Up   | 0.43  | 0.83      |      | 0.95  | 0.45 |      | zinc finger (C2H2 type) family protein                                   |         |
| Pc_TC032275 | 0     | 0.12  |      | -0.43 | 0.91      |      | 3.17  | 0.02      | Up   | 1.52  | 0.23 |      | Putative uncharacterized protein                                         |         |



|             |       |      |      |       |           |      |       |           |      |       |       |      |                                                                          |      |
|-------------|-------|------|------|-------|-----------|------|-------|-----------|------|-------|-------|------|--------------------------------------------------------------------------|------|
| Pc_TC032276 | 1.08  | 0.77 |      | 1.38  | 0.65      |      | 4.09  | 0.02      | Up   | 2.71  | 0.12  |      | Uncharacterized protein                                                  |      |
| Pc_TC032288 | -0.15 | 0.87 |      | 1.51  | 0.05      | Up   | -0.56 | 0.66      |      | 0.45  | 0.6   |      | SAUR-like auxin-responsive protein family                                |      |
| Pc_TC032302 | 0.86  | 0.03 |      | 1.11  | 0.02      | Up   | -1.12 | 0.23      |      | 0.55  | 0.32  |      | Eukaryotic aspartyl protease family protein                              |      |
| Pc_TC032316 | 0.74  | 0.53 |      | 1.12  | 0.34      |      | 1.17  | 0.42      |      | 2.17  | 0.03  | Up   | basic chitinase                                                          |      |
| Pc_TC032317 | 2.34  | 0.05 | Up   | 2.13  | 0.12      |      | 1.35  | 0.47      |      | 2.3   | 0.07  |      | basic chitinase                                                          |      |
| Pc_TC032318 | 0.51  | 0.16 |      | -1.02 | 0.05      | Down | -0.49 | 0.58      |      | -0.47 | 0.4   |      | starch branching enzyme 2.2                                              |      |
| Pc_TC032352 | -0.74 | 0.04 |      | -1.37 | 0         | Down | 1.11  | 0.19      |      | 0.18  | 0.73  |      | sulfoquinovosyldiacylglycerol 2                                          |      |
| Pc_TC032392 | 0.49  | 0.76 |      | 2.5   | 0.02      | Up   | 1.24  | 0.42      |      | 0.04  | 1     |      | K-box region and MADS-box transcription factor family protein            | MADS |
| Pc_TC032407 | -0.16 | 0.94 |      | 0.44  | 0.71      |      | 2.45  | 0.04      | Up   | 1.28  | 0.18  |      | early nodulin-like protein 20                                            |      |
| Pc_TC032434 | 0.75  | 0.07 |      | 0.24  | 0.65      |      | 0.45  | 0.63      |      | 1.35  | 0.02  | Up   | Predicted protein                                                        |      |
| Pc_TC032450 | -1.51 | 0.77 |      | 1.93  | 0.29      |      | 4.05  | 0.01      | Up   | 2.43  | 0.11  |      | BTB/POZ domain-containing protein                                        | TRAF |
| Pc_TC032451 | -1.51 | 0.54 |      | 0.8   | 0.67      |      | 2.9   | 0.05      | Up   | 1.8   | 0.16  |      | BTB/POZ domain-containing protein                                        | TRAF |
| Pc_TC032458 | 0.93  | 0.26 |      | 2.54  | 0         | Up   | 0.32  | 0.83      |      | 1.21  | 0.18  |      | Pathogenesis-related 1 protein superfamily protein                       |      |
| Pc_TC032466 | -1.86 | 0    | Down | -2.85 | 0         | Down | -1.22 | 0.25      |      | -1.17 | 0.11  |      | receptor lectin kinase                                                   |      |
| Pc_TC032467 | -1.62 | 0.02 | Down | -2.55 | 0         | Down | -0.75 | 0.5       |      | -0.41 | 0.59  |      | Concanavalin A-like lectin protein kinase family protein                 |      |
| Pc_TC032472 | 0.66  | 0.97 |      | 0.06  | 1         |      | 3.83  | 0.03      | Up   | 2.21  | 0.26  |      | Protein of unknown function (DUF1005)                                    |      |
| Pc_TC032475 | 1.41  | 0.08 |      | 2.31  | 0.01      | Up   | 1.73  | 0.16      |      | 1.85  | 0.04  | Up   | amino acid permease 6                                                    |      |
| Pc_TC032476 | 0.09  | 0.86 |      | 0.36  | 0.51      |      | 1.81  | 0.05      | Up   | 0.9   | 0.13  |      | Leucine-rich receptor-like protein kinase family protein                 |      |
| Pc_TC032484 | -0.66 | 0.4  |      | 0     | 1         |      | -1.47 | 0.24      |      | -2.46 | 0.01  | Down | myb domain protein 4r1                                                   | MYB  |
| Pc_TC032489 | -1.24 | 0    | Down | 0.74  | 0.11      |      | 0.28  | 0.76      |      | -0.64 | 0.25  |      | pre-mRNA processing ribonucleoprotein binding region-containing protein  |      |
| Pc_TC032499 | 0.34  | 0.39 |      | -0.17 | 0.75      |      | 1.3   | 0.14      |      | 1.15  | 0.04  | Up   | phytochrome interacting factor 3-like 5                                  | bHLH |
| Pc_TC032503 | -0.86 | 0.18 |      | -0.99 | 0.19      |      | 4.07  | 4.08E-005 | Up   | 2.84  | ##### | Up   | Leucine-rich receptor-like protein kinase family protein                 |      |
| Pc_TC032508 | -1.79 | 0.01 | Down | -0.56 | 0.48      |      | 1.3   | 0.22      |      | 0.51  | 0.48  |      | Outer arm dynein light chain 1 protein                                   |      |
| Pc_TC032509 | -0.8  | 0.05 |      | -1.39 | 0.01      | Down | 2.07  | 0.02      | Up   | 1.11  | 0.04  | Up   | photosystem I subunit K                                                  |      |
| Pc_TC032512 | 0.4   | 0.17 |      | 0.37  | 0.31      |      | -1.82 | 0.03      | Down | -1.56 | 0     | Down | Early-responsive to dehydration stress protein (ERD4)                    |      |
| Pc_TC032519 | 0.53  | 0.26 |      | 0.9   | 0.11      |      | -2.12 | 0.04      | Down | -0.73 | 0.26  |      | inositol transporter 2                                                   |      |
| Pc_TC032527 | 1     | 0.15 |      | 1.98  | 0.01      | Up   | -3.27 | 0.02      | Down | -3.15 | 0     | Down | nine-cis-epoxycarotenoid dioxygenase 9                                   |      |
| Pc_TC032539 | -0.48 | 0.57 |      | -0.37 | 0.7       |      | 2.22  | 0.04      | Up   | 1.6   | 0.04  | Up   | Protein kinase superfamily protein                                       |      |
| Pc_TC032545 | 0.03  | 0.94 |      | -1.04 | 0.02      | Down | 0.81  | 0.34      |      | 0.49  | 0.34  |      | Lactoylglutathione lyase / glyoxalase I family protein                   |      |
| Pc_TC032548 | 1.81  | 0    | Up   | 2.09  | 0         | Up   | 1.13  | 0.31      |      | 1.69  | 0.02  | Up   | calcium dependent protein kinase 1                                       |      |
| Pc_TC032555 | -0.68 | 0.1  |      | -1.05 | 0.05      | Down | 0.77  | 0.39      |      | 0.23  | 0.68  |      | double-stranded RNA binding protein-related / DsRBD protein-related      |      |
| Pc_TC032564 | -1.19 | 0.05 | Down | -0.43 | 0.53      |      | 1.96  | 0.04      | Up   | 1.07  | 0.1   |      | Leucine-rich repeat protein kinase family protein                        |      |
| Pc_TC032565 | -1.08 | 0.05 |      | -0.57 | 0.38      |      | 2.16  | 0.02      | Up   | 1.25  | 0.04  | Up   | Leucine-rich repeat protein kinase family protein                        |      |
| Pc_TC032589 | 0.53  | 0.26 |      | 0.96  | 0.09      |      | -3.14 | 0         | Down | -0.73 | 0.26  |      | lipid-transfer protein/seed storage 2S albumin superfamily protein       |      |
| Pc_TC032591 | 0.51  | 0.22 |      | 1.11  | 0.03      | Up   | -0.55 | 0.56      |      | -0.7  | 0.25  |      | Leucine-rich repeat (LRR) family protein                                 |      |
| Pc_TC032601 | -1.47 | 0.01 | Down | -1.16 | 0.08      |      | 0.5   | 0.61      |      | 0.16  | 0.81  |      | Pentatricopeptide repeat (PPR-like) superfamily protein                  |      |
| Pc_TC032602 | 1.95  | 0.01 | Up   | 0.4   | 0.71      |      | 0.64  | 0.63      |      | 0.83  | 0.37  |      | Pentatricopeptide repeat (PPR-like) superfamily protein                  |      |
| Pc_TC032609 | 0.71  | 0.24 |      | 1.45  | 0.03      | Up   | -1.96 | 0.1       |      | -1.26 | 0.12  |      | basic leucine zipper 25                                                  | bZIP |
| Pc_TC032620 | 0.29  | 0.36 |      | 0.5   | 0.22      |      | -1.84 | 0.03      | Down | -1.23 | 0.02  | Down | thioredoxin H-type 1                                                     |      |
| Pc_TC032637 | -0.51 | 1    |      | 2.64  | 0.09      |      | 3.5   | 0.03      | Up   | 1.63  | 0.38  |      | thioredoxin 2                                                            |      |
| Pc_TC032643 | 0.63  | 0.35 |      | 1.97  | 0         | Up   | -4.13 | 0         | Down | -1.52 | 0.09  |      | P-loop containing nucleoside triphosphate hydrolases superfamily protein |      |
| Pc_TC032673 | 0.32  | 0.63 |      | 0.2   | 0.81      |      | 2.65  | 0.01      | Up   | 1.42  | 0.05  | Up   | Putative leucine zipper-containing protein                               |      |
| Pc_TC032677 | 0     | 1    |      | 0.19  | 0.8       |      | 2.03  | 0.04      | Up   | 1.08  | 0.11  |      | Protein of Unknown Function (DUF239)                                     |      |
| Pc_TC032680 | 2.12  | 0.04 | Up   | 2.23  | 0.05      | Up   | -0.17 | 0.99      |      | 0.87  | 0.54  |      | Major facilitator superfamily protein                                    |      |
| Pc_TC032699 | -0.24 | 1    |      | 0     | 0.27      |      | 3.14  | 0.03      | Up   | 0.47  | 0.87  |      | basic helix-loop-helix (bHLH) DNA-binding superfamily protein            | bHLH |
| Pc_TC032701 | -0.26 | 0.61 |      | -0.13 | 0.83      |      | 2.07  | 0.03      | Up   | 1.23  | 0.04  | Up   | chloroplast stem-loop binding protein of 41 kDa                          |      |
| Pc_TC032708 | -0.64 | 0.21 |      | -1.36 | 0.03      | Down | 0.85  | 0.37      |      | 0.4   | 0.51  |      | PENTATRICOPEPTIDE REPEAT 596                                             |      |
| Pc_TC032709 | -2.62 | 0.03 | Down | -2.32 | 0.08      |      | -0.29 | 0.85      |      | -1.27 | 0.26  |      | PENTATRICOPEPTIDE REPEAT 596                                             |      |
| Pc_TC032721 | 0.77  | 0.25 |      | 1.59  | 0.03      | Up   | -2.38 | 0.07      |      | -0.4  | 0.65  |      | Protein kinase superfamily protein                                       |      |
| Pc_TC032755 | 0.18  | 0.67 |      | 0.05  | 0.93      |      | -2.84 | 0.01      | Down | -1.93 | 0     | Down | UDP-Glycosyltransferase superfamily protein                              |      |
| Pc_TC032764 | 0.22  | 0.62 |      | -0.2  | 0.72      |      | -2.98 | 0         | Down | -1.58 | 0.01  | Down | Cytidine/deoxycytidylate deaminase family protein                        |      |
| Pc_TC032765 | 0.33  | 0.41 |      | -0.28 | 0.59      |      | -3.43 | 0         | Down | -0.03 | 0.97  |      | Cytidine/deoxycytidylate deaminase family protein                        |      |
| Pc_TC032767 | 0.76  | 0.31 |      | 3.72  | 8.79E-008 | Up   | 2.36  | 0.03      | Up   | 1.38  | 0.09  |      | Cytidine/deoxycytidylate deaminase family protein                        |      |
| Pc_TC032791 | -0.81 | 0.1  |      | -1.42 | 0.02      | Down | 1.85  | 0.04      | Up   | 0.83  | 0.16  |      | Thioredoxin superfamily protein                                          |      |
| Pc_TC032802 | 0.03  | 0.96 |      | 0.26  | 0.68      |      | -2.65 | 0.02      | Down | -1.74 | 0.02  | Down | guanosine nucleotide diphosphate dissociation inhibitor 1                |      |
| Pc_TC032808 | 0.82  | 0.54 |      | 2.17  | 0.05      | Up   | 1.38  | 0.36      |      | 0.85  | 0.53  |      | B12D protein                                                             |      |
| Pc_TC032818 | -0.08 | 0.88 |      | -1.94 | 0         | Down | 0.87  | 0.35      |      | 1.6   | 0.01  | Up   | receptor lectin kinase                                                   |      |
| Pc_TC032823 | -0.05 | 0.92 |      | -0.49 | 0.37      |      | 0.96  | 0.29      |      | 1.25  | 0.03  | Up   | white-brown complex homolog protein 11                                   |      |
| Pc_TC032824 | -2.24 | 0.14 |      | -2.85 | 0.11      |      | -4.4  | 0.05      | Down | -2.7  | 0.09  |      | alpha/beta-Hydrolases superfamily protein                                |      |
| Pc_TC032836 | 0.47  | 0.17 |      | 0.66  | 0.13      |      | -1.95 | 0.03      | Down | -0.66 | 0.21  |      | Nucleotide-diphospho-sugar transferase, predicted (InterPro:IPR005069)   |      |
| Pc_TC032837 | 0.41  | 0.21 |      | 0.6   | 0.14      |      | -1.75 | 0.05      | Down | -1.01 | 0.05  |      | unknown protein                                                          |      |
| Pc_TC032864 | 1.18  | 0    | Up   | 0.54  | 0.3       |      | -0.49 | 0.6       |      | 1.05  | 0.06  |      | Calcium-dependent lipid-binding (CaLB domain) family protein             |      |

|             |       |      |      |  |       |      |      |       |           |      |  |       |       |      |                                                                          |       |
|-------------|-------|------|------|--|-------|------|------|-------|-----------|------|--|-------|-------|------|--------------------------------------------------------------------------|-------|
| Pc_TC032866 | -1.28 | 0.08 |      |  | -1.8  | 0.04 | Down | 1.18  | 0.27      |      |  | 0.61  | 0.41  |      | Mitochondrial transcription termination factor family protein            | mTERF |
| Pc_TC032875 | -0.89 | 0    |      |  | -1.2  | 0    | Down | -1.16 | 0.17      |      |  | -1.55 | 0     | Down | UDP-Glycosyltransferase superfamily protein                              |       |
| Pc_TC032876 | -0.65 | 0.05 |      |  | -0.78 | 0.07 |      | -1.49 | 0.09      |      |  | -1.97 | 0     | Down | UDP-Glycosyltransferase superfamily protein                              |       |
| Pc_TC032898 | -1.74 | 0.02 | Down |  | -0.63 | 0.42 |      | -0.39 | 0.73      |      |  | -1.86 | 0.03  | Down | UDP-Glycosyltransferase superfamily protein                              |       |
| Pc_TC032911 | 2.59  | 0    | Up   |  | 0.7   | 0.49 |      | 3.77  | 0         | Up   |  | 0.19  | 0.89  |      | Tetratricopeptide repeat (TPR)-like superfamily protein                  |       |
| Pc_TC032913 | 0.45  | 0.44 |      |  | 0.29  | 0.68 |      | 3.17  | 0         | Up   |  | 1.09  | 0.11  |      | cellulose synthase A2                                                    |       |
| Pc_TC032914 | -0.59 | 0.06 |      |  | -0.25 | 0.52 |      | 1.75  | 0.04      | Up   |  | 0.8   | 0.1   |      | cellulose synthase A2                                                    |       |
| Pc_TC032922 | -1.3  | 0.16 |      |  | -0.58 | 0.56 |      | -1.32 | 0.32      |      |  | -2.34 | 0.03  | Down | regulatory particle non-ATPase 12A                                       |       |
| Pc_TC032923 | -0.14 | 0.68 |      |  | -0.74 | 0.1  |      | 1.69  | 0.05      | Up   |  | 0.83  | 0.1   |      | photosystem I subunit E-2                                                |       |
| Pc_TC032925 | -1.53 | 0.02 | Down |  | -1.55 | 0.04 | Down | 1.74  | 0.08      |      |  | 1.82  | 0     | Up   | Transducin/WD40 repeat-like superfamily protein                          |       |
| Pc_TC032971 | -2.86 | 0.03 | Down |  | -1.47 | 0.25 |      | 1.37  | 0.27      |      |  | -0.25 | 0.85  |      | O-methyltransferase family protein                                       |       |
| Pc_TC032980 | -1.26 | 0.03 | Down |  | -0.55 | 0.41 |      | 2.09  | 0.03      | Up   |  | 1.13  | 0.07  |      | photosystem I P subunit                                                  |       |
| Pc_TC032998 | 0.61  | 0.12 |      |  | 1.71  | 0    | Up   | -0.76 | 0.41      |      |  | -0.07 | 0.9   |      | S-adenosylmethionine synthetase 2                                        |       |
| Pc_TC033003 | 0.54  | 0.38 |      |  | -0.05 | 0.96 |      | 1.71  | 0.1       |      |  | 1.86  | 0.01  | Up   | xyloglucan endotransglucosylase/hydrolase 32                             |       |
| Pc_TC033005 | 2.12  | 0.01 | Up   |  | 0.35  | 0.79 |      | -0.76 | 0.63      |      |  | 0.16  | 0.93  |      | zinc ion binding                                                         |       |
| Pc_TC033016 | -2.15 | 0    | Down |  | -0.47 | 0.51 |      | 0.11  | 0.92      |      |  | -0.41 | 0.58  |      | Class II aminoacyl-tRNA and biotin synthetases superfamily protein       |       |
| Pc_TC033054 | -1.51 | 0.04 | Down |  | -1.26 | 0.13 |      | 1.69  | 0.11      |      |  | 0.57  | 0.45  |      | Leucine-rich repeat transmembrane protein kinase                         |       |
| Pc_TC033060 | -2.11 | 0.02 | Down |  | -1.13 | 0.24 |      | -0.1  | 0.95      |      |  | -0.35 | 0.71  |      | NB-ARC domain-containing disease resistance protein                      |       |
| Pc_TC033063 | 0.18  | 0.82 |      |  | 1.59  | 0.03 | Up   | 0.2   | 0.88      |      |  | 0.38  | 0.65  |      | UDP-glucosyl transferase 71C4                                            |       |
| Pc_TC033077 | -0.9  | 0.08 |      |  | -1.29 | 0.04 | Down | 0.85  | 0.37      |      |  | 0.39  | 0.53  |      | ATP-dependent protease La (LON) domain protein                           |       |
| Pc_TC033108 | 0.56  | 0.43 |      |  | 1.66  | 0.02 | Up   | -2.52 | 0.06      |      |  | -1.2  | 0.19  |      | P-loop containing nucleoside triphosphate hydrolases superfamily protein |       |
| Pc_TC033118 | -1.21 | 0.29 |      |  | -0.7  | 0.58 |      | 2.54  | 0.03      | Up   |  | 0.41  | 0.71  |      | Uncharacterized protein                                                  |       |
| Pc_TC033130 | -0.15 | 0.85 |      |  | 1.31  | 0.06 |      | -3.73 | 0.01      | Down |  | -2.43 | 0.01  | Down | glucose-6-phosphate/phosphate translocator 2                             |       |
| Pc_TC033135 | 1.78  | 0.23 |      |  | 3.79  | 0    | Up   | -0.91 | 0.82      |      |  | 1.53  | 0.35  |      | Chalcone and stilbene synthase family protein                            |       |
| Pc_TC033140 | 0.39  | 0.36 |      |  | 0     | 1    |      | -0.66 | 0.49      |      |  | 1.74  | 0     | Up   | isocitrate lyase                                                         |       |
| Pc_TC033141 | -0.01 | 0.98 |      |  | -0.2  | 0.7  |      | 0.09  | 0.92      |      |  | 1.72  | 0     | Up   | isocitrate lyase                                                         |       |
| Pc_TC033143 | -0.9  | 0.01 |      |  | -1.61 | 0    | Down | 1.41  | 0.1       |      |  | 0.8   | 0.12  |      | thiazole biosynthetic enzyme, chloroplast (ARA6) (TH1) (TH14)            |       |
| Pc_TC033170 | 1.88  | 0    | Up   |  | -0.32 | 0.75 |      | 2.14  | 0.05      |      |  | 2.39  | 0     | Up   | cysteine-rich RLK (RECEPTOR-like protein kinase) 10                      |       |
| Pc_TC033172 | 0.54  | 0.43 |      |  | -0.27 | 0.76 |      | 0.72  | 0.52      |      |  | 1.82  | 0.01  | Up   | cysteine-rich RLK (RECEPTOR-like protein kinase) 29                      |       |
| Pc_TC033184 | -1.04 | 0.08 |      |  | -1.44 | 0.04 | Down | 1.1   | 0.27      |      |  | 0.53  | 0.42  |      | cysteine-rich RLK (RECEPTOR-like protein kinase) 10                      |       |
| Pc_TC033185 | -0.76 | 0.11 |      |  | -1.54 | 0.01 | Down | 1.04  | 0.26      |      |  | 0.4   | 0.5   |      | cysteine-rich RLK (RECEPTOR-like protein kinase) 8                       |       |
| Pc_TC033189 | 0.1   | 0.88 |      |  | -0.12 | 0.87 |      | -2.33 | 0.04      | Down |  | -1.85 | 0.02  | Down | cysteine-rich RLK (RECEPTOR-like protein kinase) 8                       |       |
| Pc_TC033192 | 0.68  | 0.19 |      |  | -0.02 | 0.98 |      | 1.3   | 0.19      |      |  | 1.32  | 0.04  | Up   | cysteine-rich RLK (RECEPTOR-like protein kinase) 10                      |       |
| Pc_TC033193 | -1.38 | 0.04 | Down |  | -0.74 | 0.33 |      | 0.37  | 0.73      |      |  | -1.07 | 0.17  |      | cysteine-rich RLK (RECEPTOR-like protein kinase) 10                      |       |
| Pc_TC033205 | 0.43  | 0.37 |      |  | 1.93  | 0    | Up   | -0.41 | 0.68      |      |  | -0.03 | 0.97  |      | Histone superfamily protein                                              | CCAAT |
| Pc_TC033215 | -1.07 | 0.02 | Down |  | -0.98 | 0.07 |      | 1.13  | 0.2       |      |  | 0.03  | 0.97  |      | high chlorophyll fluorescent 109                                         |       |
| Pc_TC033216 | 1.39  | 0.02 | Up   |  | 1.12  | 0.13 |      | 2.27  | 0.03      | Up   |  | 1.04  | 0.16  |      | high chlorophyll fluorescent 109                                         |       |
| Pc_TC033222 | -1.27 | 0.01 | Down |  | -1.37 | 0.03 | Down | 1.88  | 0.04      | Up   |  | 0.87  | 0.15  |      | Pentatricopeptide repeat (PPR-like) superfamily protein                  |       |
| Pc_TC033229 | 1.14  | 0    | Up   |  | 1.24  | 0.01 | Up   | -0.51 | 0.57      |      |  | 1.34  | 0.01  | Up   | S-locus lectin protein kinase family protein                             |       |
| Pc_TC033230 | 1.2   | 0.01 | Up   |  | 1.4   | 0.01 | Up   | -0.99 | 0.33      |      |  | 1.35  | 0.03  | Up   | receptor kinase 3                                                        |       |
| Pc_TC033231 | 0.87  | 0.24 |      |  | 0.98  | 0.25 |      | 0.1   | 0.96      |      |  | 2.06  | 0.01  | Up   | S-locus lectin protein kinase family protein                             |       |
| Pc_TC033244 | 1.41  | 0.06 |      |  | 0.35  | 0.75 |      | 1.14  | 0.35      |      |  | 2.05  | 0.01  | Up   | cysteine-rich RLK (RECEPTOR-like protein kinase) 34                      |       |
| Pc_TC033249 | -0.28 | 0.62 |      |  | -0.08 | 0.92 |      | 2.15  | 0.03      | Up   |  | 1.38  | 0.03  | Up   | Major facilitator superfamily protein                                    |       |
| Pc_TC033256 | -0.18 | 0.64 |      |  | -0.02 | 0.96 |      | 2.21  | 0.01      | Up   |  | 1.31  | 0.01  | Up   | light harvesting complex photosystem II                                  |       |
| Pc_TC033260 | 0.58  | 0.31 |      |  | 0.97  | 0.14 |      | -2.48 | 0.03      | Down |  | -2.27 | 0.01  | Down | F-box family protein                                                     |       |
| Pc_TC033264 | -0.69 | 0.11 |      |  | -0.31 | 0.55 |      | 2.11  | 0.02      | Up   |  | 0.78  | 0.16  |      | light-harvesting chlorophyll B-binding protein 3                         |       |
| Pc_TC033267 | 0.28  | 0.43 |      |  | 0.79  | 0.07 |      | -5.95 | 8.42E-008 | Down |  | -3.13 | ##### | Down | Protein of unknown function (DUF761)                                     |       |
| Pc_TC033278 | -0.02 | 0.99 |      |  | 0.22  | 0.76 |      | 3.98  | 6.23E-005 | Up   |  | 2.27  | 0     | Up   | Cyclophilin-like peptidyl-prolyl cis-trans isomerase family protein      |       |
| Pc_TC033285 | 0.82  | 0.31 |      |  | -1.39 | 0.22 |      | 2.23  | 0.05      |      |  | 2.05  | 0.01  | Up   | Cytochrome c                                                             |       |
| Pc_TC033294 | 0.04  | 0.96 |      |  | -0.55 | 0.47 |      | 2.6   | 0.01      | Up   |  | 1.75  | 0.01  | Up   | Chaperonin-like RbcX protein                                             |       |
| Pc_TC033300 | -0.35 | 0.3  |      |  | -0.81 | 0.07 |      | 1.71  | 0.04      | Up   |  | 0.81  | 0.11  |      | ribosome recycling factor, chloroplast precursor                         |       |
| Pc_TC033310 | -0.27 | 0.58 |      |  | -0.07 | 0.91 |      | 2.29  | 0.01      | Up   |  | 1.46  | 0.01  | Up   | Protein of Unknown Function (DUF239)                                     |       |
| Pc_TC033348 | 0.88  | 0.07 |      |  | 1.4   | 0.02 | Up   | -1.6  | 0.13      |      |  | 0.54  | 0.4   |      | Protein kinase superfamily protein                                       |       |
| Pc_TC033355 | 0.4   | 0.96 |      |  | 3.34  | 0.01 | Up   | 0     | 0.26      |      |  | -1.37 | 0.66  |      | unknown protein                                                          |       |
| Pc_TC033369 | -1.12 | 0.01 | Down |  | -1.3  | 0.02 | Down | 1.04  | 0.24      |      |  | 0.1   | 0.86  |      | formin homolog 6                                                         |       |
| Pc_TC033375 | 5.33  | 0    | Up   |  | 4.38  | 0.02 | Up   | 4.86  | 0.01      | Up   |  | 5.35  | 0     | Up   | Transducin/WD40 repeat-like superfamily protein                          |       |
| Pc_TC033388 | 0.38  | 0.52 |      |  | 0.6   | 0.37 |      | -1.93 | 0.09      |      |  | -1.94 | 0.01  | Down | Got1/Sft2-like vesicle transport protein family                          |       |
| Pc_TC033392 | -0.13 | 0.79 |      |  | 0.12  | 0.84 |      | 1.83  | 0.05      | Up   |  | 1.34  | 0.02  | Up   | DHHC-type zinc finger family protein                                     |       |
| Pc_TC033400 | 0.69  | 0.05 |      |  | 1.64  | 0    | Up   | -2    | 0.03      | Down |  | 0.18  | 0.74  |      | Leucine-rich repeat protein kinase family protein                        |       |
| Pc_TC033402 | 0.41  | 0.66 |      |  | 2.04  | 0.01 | Up   | 2.79  | 0.02      | Up   |  | 2.1   | 0.01  | Up   | SNF2 domain-containing protein / helicase domain-containing protein      | SNF2  |
| Pc_TC033404 | -1.24 | 0.02 | Down |  | -1.5  | 0.02 | Down | -3.28 | 0         | Down |  | -3.33 | ##### | Down | SNF2 domain-containing protein / helicase domain-containing protein      | SNF2  |
| Pc_TC033412 | 2.54  | 0.05 | Up   |  | 1.38  | 0.45 |      | 0.96  | 0.69      |      |  | -0.37 | 0.99  |      | Os07g0600000 protein                                                     |       |

|             |       |       |      |       |           |      |       |      |      |       |      |      |                                                                           |           |
|-------------|-------|-------|------|-------|-----------|------|-------|------|------|-------|------|------|---------------------------------------------------------------------------|-----------|
| Pc_TC033418 | 0.93  | 0.6   |      | 3.2   | 0.01      | Up   | -0.5  | 0.91 |      | -0.11 | 1    |      | NAD(P)-binding Rossmann-fold superfamily protein                          |           |
| Pc_TC033419 | 0.5   | 0.46  |      | 1.48  | 0.04      | Up   | -1.12 | 0.34 |      | -0.35 | 0.68 |      | NAD(P)-binding Rossmann-fold superfamily protein                          |           |
| Pc_TC033420 | 0.1   | 0.84  |      | 0.33  | 0.56      |      | -2.15 | 0.04 | Down | -0.55 | 0.39 |      | NAD(P)-binding Rossmann-fold superfamily protein                          |           |
| Pc_TC033425 | 0.56  | 0.69  |      | 2.38  | 0.02      | Up   | -2.82 | 0.2  |      | -1.11 | 0.51 |      | PLC-like phosphodiesterases superfamily protein                           |           |
| Pc_TC033426 | -0.2  | 0.8   |      | 1.45  | 0.05      | Up   | -2.67 | 0.04 | Down | -0.99 | 0.25 |      | ABI five binding protein 3                                                |           |
| Pc_TC033427 | -0.62 | 0.19  |      | -1.41 | 0.02      | Down | 1.04  | 0.26 |      | 0.22  | 0.72 |      | Nuclear transport factor 2 (NTF2) family protein                          |           |
| Pc_TC033429 | 0.23  | 0.45  |      | 0.18  | 0.65      |      | -1.53 | 0.07 |      | -1.5  | 0    | Down | unknown protein                                                           |           |
| Pc_TC033433 | 1.65  | 0.01  | Up   | 0.09  | 0.95      |      | -0.04 | 1    |      | 1.74  | 0.03 | Up   | 6-phosphogluconolactonase 1                                               |           |
| Pc_TC033434 | 0.58  | 0.13  |      | 0.42  | 0.39      |      | -1.44 | 0.13 |      | -1.18 | 0.04 | Down | COBRA-like protein 1 precursor                                            |           |
| Pc_TC033443 | 0.29  | 0.75  |      | 0.31  | 0.77      |      | -3.91 | 0.02 | Down | -0.62 | 0.55 |      | Putative uncharacterized protein                                          |           |
| Pc_TC033449 | 1.99  | 0.06  |      | 2.38  | 0.03      | Up   | -0.91 | 0.69 |      | 1.38  | 0.27 |      | Pectin lyase-like superfamily protein                                     |           |
| Pc_TC033464 | -0.56 | 0.1   |      | -1.02 | 0.02      | Down | 0.37  | 0.66 |      | -0.05 | 0.93 |      | strictosidine synthase-like 4                                             |           |
| Pc_TC033466 | 2.74  | 0.05  | Up   | 2.56  | 0.1       |      | 1.73  | 0.42 |      | 1.04  | 0.66 |      | 20S proteasome subunit PAA2                                               |           |
| Pc_TC033472 | -1.59 | 0.02  | Down | 0.68  | 0.32      |      | 1.03  | 0.32 |      | 0.49  | 0.49 |      | FAR1-related sequence 5                                                   | FAR1      |
| Pc_TC033479 | 0.65  | 0.23  |      | 1.03  | 0.1       |      | 0.68  | 0.5  |      | 1.37  | 0.04 | Up   | ethylene-responsive element binding protein                               | AP2-EREBP |
| Pc_TC033480 | 0.95  | 0.54  |      | 1.17  | 0.46      |      | 2.83  | 0.05 |      | 2.36  | 0.05 | Up   | Disease resistance-responsive (dirigent-like protein) family protein      |           |
| Pc_TC033491 | 1.49  | 0.17  |      | 1.64  | 0.17      |      | 1.19  | 0.45 |      | 2.16  | 0.04 | Up   | Os07g0624100 protein                                                      |           |
| Pc_TC033501 | -0.09 | 0.82  |      | 0.7   | 0.14      |      | -1.65 | 0.08 |      | -1.52 | 0.01 | Down | Protein kinase superfamily protein                                        |           |
| Pc_TC033503 | 0.24  | 0.61  |      | 0.43  | 0.45      |      | -2.7  | 0.01 | Down | -2.54 | 0    | Down | Protein kinase superfamily protein                                        |           |
| Pc_TC033504 | 1.12  | 0.03  | Up   | 0.53  | 0.41      |      | -0.64 | 0.55 |      | -2.36 | 0    | Down | Protein kinase superfamily protein                                        |           |
| Pc_TC033505 | -0.13 | 0.77  |      | 0.05  | 0.93      |      | -2.87 | 0.01 | Down | -2.15 | 0    | Down | Protein kinase superfamily protein                                        |           |
| Pc_TC033506 | 0.73  | 0.04  |      | 0.93  | 0.04      |      | -1.52 | 0.1  |      | -1.35 | 0.02 | Down | Protein kinase superfamily protein                                        |           |
| Pc_TC033543 | -0.61 | 0.06  |      | -0.89 | 0.04      |      | 1.65  | 0.05 | Up   | 0.92  | 0.06 |      | RNA-binding (RRM/RBD/RNP motifs) family protein                           |           |
| Pc_TC033547 | 0.42  | 0.18  |      | 0.48  | 0.23      |      | -2.62 | 0    | Down | -1.27 | 0.01 | Down | SC35-like splicing factor 33                                              |           |
| Pc_TC033554 | -0.06 | 0.85  |      | 0.22  | 0.58      |      | -2.54 | 0    | Down | -1.9  | 0    | Down | Haloacid dehalogenase-like hydrolase (HAD) superfamily protein            |           |
| Pc_TC033558 | 0.08  | 1     |      | -0.94 | 1         |      | 4.12  | 0.02 | Up   | 2.71  | 0.12 |      | myb domain protein 86                                                     | MYB       |
| Pc_TC033563 | 0.54  | 0.07  |      | 0.6   | 0.11      |      | -2.83 | 0    | Down | -1.72 | 0    | Down | Low temperature and salt responsive protein family                        |           |
| Pc_TC033578 | 0.76  | 0.18  |      | 2.27  | 0         | Up   | -1.31 | 0.24 |      | 0.69  | 0.32 |      | tolB protein-related                                                      |           |
| Pc_TC033583 | 2.27  | 0     | Up   | -1    | 0.39      |      | 0.53  | 0.69 |      | 1.26  | 0.15 |      | Peptidase C15,pyroglutamyl peptidase I-like                               |           |
| Pc_TC033590 | -2.19 | 0.01  | Down | -2.35 | 0.02      | Down | -1.37 | 0.27 |      | -1.24 | 0.17 |      | Putative methyltransferase family protein                                 |           |
| Pc_TC033633 | -1.52 | ##### | Down | -2.16 | 3.02E-007 | Down | 1.8   | 0.03 | Up   | 0.34  | 0.49 |      | magnesium-chelatase subunit chlH,chloroplast,putative                     |           |
| Pc_TC033650 | -0.08 | 0.78  |      | -0.63 | 0.09      |      | 1.63  | 0.08 |      | 1.17  | 0.02 | Up   | glutamate synthase 1                                                      |           |
| Pc_TC033664 | 2.3   | 0.13  |      | 3.93  | 0         | Up   | -0.5  | 0.99 |      | 0.36  | 1    |      | dehydration-induced protein (ERD15)                                       |           |
| Pc_TC033674 | 1.97  | 0.01  | Up   | -0.63 | 0.62      |      | 4.22  | 0    | Up   | 2.8   | 0    | Up   | Tryptophan/tyrosine permease                                              |           |
| Pc_TC033688 | 0.8   | 0.28  |      | 1.63  | 0.04      | Up   | -0.06 | 0.98 |      | 0.26  | 0.79 |      | beta-amylase 3                                                            |           |
| Pc_TC033711 | -0.99 | 0.03  |      | 0.12  | 0.82      |      | -1.6  | 0.1  |      | -1.55 | 0.01 | Down | protein arginine methyltransferase 4B                                     |           |
| Pc_TC033718 | 0.41  | 0.58  |      | 1.47  | 0.05      |      | 0     | 0    |      | -4.02 | 0    | Down | UDP-Glycosyltransferase superfamily protein                               |           |
| Pc_TC033719 | -0.15 | 0.66  |      | -1.07 | 0.02      | Down | -0.04 | 0.96 |      | -0.21 | 0.69 |      | Ribosomal protein S8e family protein                                      |           |
| Pc_TC033724 | -2.24 | 0.14  |      | 0.8   | 0.49      |      | -4.4  | 0.05 | Down | -1.96 | 0.18 |      | SERINE-ARGININE PROTEIN 30                                                |           |
| Pc_TC033740 | 2.4   | 0.4   |      | 3.38  | 0.14      |      | 5     | 0.01 | Up   | 4.58  | 0.01 | Up   | Peroxidase superfamily protein                                            |           |
| Pc_TC033744 | -0.13 | 0.87  |      | -0.63 | 0.45      |      | 1.96  | 0.07 |      | 2.1   | 0    | Up   | Peroxidase superfamily protein                                            |           |
| Pc_TC033757 | 0.53  | 0.52  |      | 1.42  | 0.09      |      | -1.54 | 0.26 |      | -2.61 | 0.02 | Down | Protein of unknown function (DUF3133)                                     |           |
| Pc_TC033758 | 1.74  | 0.16  |      | 2.64  | 0.03      | Up   | -1.5  | 0.56 |      | -1.37 | 0.55 |      | Protein of unknown function (DUF3133)                                     |           |
| Pc_TC033760 | 0.54  | 0.13  |      | -0.1  | 0.83      |      | 0.6   | 0.49 |      | 1.26  | 0.02 | Up   | Leucine-rich repeat protein kinase family protein                         |           |
| Pc_TC033761 | -1.23 | 0.02  | Down | 0.3   | 0.61      |      | 0.89  | 0.35 |      | -0.19 | 0.77 |      | Leucine-rich repeat protein kinase family protein                         |           |
| Pc_TC033773 | 0.34  | 0.49  |      | 1.88  | 0         | Up   | 0.17  | 0.87 |      | 0.33  | 0.6  |      | hydroxyproline-rich glycoprotein family protein                           |           |
| Pc_TC033776 | 0.54  | 0.28  |      | 1.17  | 0.04      | Up   | -1.67 | 0.11 |      | -0.48 | 0.47 |      | Arabidopsis NAC domain containing protein 87                              | NAC       |
| Pc_TC033781 | 0.58  | 0.22  |      | 1.33  | 0.02      | Up   | -0.59 | 0.55 |      | 0.28  | 0.66 |      | ETHYLENE-INSENSITIVE3-like 1                                              | EIL       |
| Pc_TC033782 | 0.57  | 0.17  |      | 1.05  | 0.04      | Up   | -1.03 | 0.28 |      | 0.06  | 0.92 |      | ETHYLENE-INSENSITIVE3-like 1                                              | EIL       |
| Pc_TC033797 | 0.55  | 0.27  |      | 0.97  | 0.1       |      | -4.28 | 0    | Down | -2.75 | 0    | Down | galactinol synthase 2                                                     |           |
| Pc_TC033799 | -1.66 | 0.02  | Down | 0.11  | 0.9       |      | 1     | 0.35 |      | 0.36  | 0.63 |      | Pentatricopeptide repeat (PPR-like) superfamily protein                   |           |
| Pc_TC033803 | -1.59 | 0.01  | Down | 0.22  | 0.74      |      | 0.36  | 0.72 |      | 1.16  | 0.07 |      | importin alpha isoform 4                                                  |           |
| Pc_TC033804 | 1.16  | 0.03  | Up   | 0.19  | 0.79      |      | -0.14 | 0.9  |      | -0.23 | 0.76 |      | importin alpha isoform 4                                                  |           |
| Pc_TC033816 | 0.03  | 0.99  |      | 1.09  | 0.12      |      | -2.34 | 0.06 |      | -2.22 | 0.01 | Down | Uncharacterised protein family (UPF0497)                                  |           |
| Pc_TC033823 | 0.58  | 0.16  |      | 1.94  | 5.74E-005 | Up   | 0.54  | 0.56 |      | 0.34  | 0.56 |      | AMP deaminase,putative / myoadenylate deaminase,putative                  |           |
| Pc_TC033843 | 0.84  | 0.2   |      | 1.67  | 0.02      | Up   | -0.81 | 0.5  |      | 0.65  | 0.41 |      | Arabidopsis thaliana protein of unknown function (DUF821)                 |           |
| Pc_TC033856 | 0.51  | 0.3   |      | 1.33  | 0.02      | Up   | -1.41 | 0.14 |      | 0.62  | 0.33 |      | 2Fe-2S ferredoxin-like superfamily protein                                |           |
| Pc_TC033879 | 0.26  | 0.4   |      | 0.22  | 0.59      |      | -1.79 | 0.04 | Down | -1.21 | 0.02 | Down | Core-2/1-branched beta-1,6-N-acetylglucosaminyltransferase family protein |           |
| Pc_TC033886 | 0.76  | 0.13  |      | 1.42  | 0.02      | Up   | -0.57 | 0.58 |      | 0.55  | 0.4  |      | HXXXD-type acyl-transferase family protein                                |           |
| Pc_TC033890 | 1.38  | 0.05  | Up   | -0.18 | 0.87      |      | -0.08 | 0.97 |      | 0.15  | 0.89 |      | carboxyl terminus of HSC70-interacting protein                            | TPR       |
| Pc_TC033894 | 0.38  | 0.33  |      | -1.66 | 0         | Down | 0.33  | 0.71 |      | 0.99  | 0.07 |      | unknown protein                                                           |           |
| Pc_TC033905 | -0.81 | 0.05  |      | -1.07 | 0.04      | Down | 0.8   | 0.36 |      | 0.41  | 0.46 |      | P-loop containing nucleoside triphosphate hydrolases superfamily protein  |           |

|             |       |       |      |       |           |      |       |      |      |       |       |      |                                                                                        |            |
|-------------|-------|-------|------|-------|-----------|------|-------|------|------|-------|-------|------|----------------------------------------------------------------------------------------|------------|
| Pc_TC033935 | -2.02 | ##### | Down | -0.97 | 0.04      |      | -2.16 | 0.02 | Down | -2.32 | ##### | Down | glyceraldehyde-3-phosphate dehydrogenase C subunit 1                                   |            |
| Pc_TC033936 | 0.05  | 0.85  |      | 0.3   | 0.41      |      | -2.63 | 0    | Down | -2.21 | ##### | Down | glyceraldehyde-3-phosphate dehydrogenase C subunit 1                                   |            |
| Pc_TC033940 | 0.37  | 0.52  |      | -0.73 | 0.32      |      | 1.41  | 0.17 |      | 1.46  | 0.03  | Up   | CCCH-type zinc fingerfamily protein with RNA-binding domain                            |            |
| Pc_TC033952 | 1.95  | 0.24  |      | 3.47  | 0.01      | Up   | 0     | 0.36 |      | 0     | 0.35  |      | BTB-POZ and MATH domain 2                                                              |            |
| Pc_TC033958 | 0.05  | 0.94  |      | -0.25 | 0.7       |      | -1.89 | 0.08 |      | -1.44 | 0.04  | Down | LSD1 zinc finger family protein                                                        |            |
| Pc_TC033970 | -1.19 | 0.08  |      | -1.59 | 0.05      | Down | 0.21  | 0.85 |      | -1.09 | 0.16  |      | Ca(2)-dependent phospholipid-binding protein (Copine) family                           |            |
| Pc_TC033974 | 0.74  | 0.01  |      | 0.85  | 0.02      |      | -1.21 | 0.15 |      | 1.2   | 0.01  | Up   | tryptophan synthase beta-subunit 2                                                     |            |
| Pc_TC033978 | 1.66  | 0.19  |      | 2.56  | 0.03      | Up   | 2.2   | 0.15 |      | 2.17  | 0.08  |      | uclacyanin 1                                                                           |            |
| Pc_TC033984 | -0.39 | 0.48  |      | -0.9  | 0.18      |      | 2.02  | 0.04 | Up   | 1.46  | 0.02  | Up   | plastid developmental protein DAG,putative                                             |            |
| Pc_TC033988 | 1.1   | 0.15  |      | 2.12  | 0.01      | Up   | -0.54 | 0.69 |      | 1.08  | 0.21  |      | Pyridoxal phosphate (PLP)-dependent transferases superfamily protein                   |            |
| Pc_TC033990 | 0.24  | 0.45  |      | 0.62  | 0.11      |      | -1.7  | 0.05 | Down | -0.42 | 0.4   |      | NAD(P)H dehydrogenase B1                                                               |            |
| Pc_TC034005 | -0.34 | 0.8   |      | -0.94 | 0.47      |      | 3.59  | 0    | Up   | 1.92  | 0.03  | Up   | myb domain protein 103                                                                 | MYB        |
| Pc_TC034018 | 1.51  | 0.06  |      | 1.87  | 0.04      | Up   | -0.43 | 0.79 |      | 1.47  | 0.11  |      | Protein of unknown function,DUF599                                                     |            |
| Pc_TC034037 | 0.64  | 0.14  |      | 0.17  | 0.76      |      | 1.94  | 0.03 | Up   | 0.8   | 0.17  |      | lsd one like 1                                                                         |            |
| Pc_TC034051 | -3.06 | 0     | Down | -0.34 | 0.68      |      | -1.19 | 0.31 |      | -0.7  | 0.39  |      | DNAJ heat shock family protein                                                         |            |
| Pc_TC034061 | -0.37 | 0.29  |      | -1.36 | 0         | Down | 1.4   | 0.1  |      | 0.89  | 0.08  |      | rubredoxin family protein                                                              |            |
| Pc_TC034071 | 0.49  | 0.48  |      | 0.69  | 0.37      |      | -3.04 | 0.02 | Down | -0.59 | 0.49  |      | Terpenoid cyclases/Protein prenyltransferases superfamily protein                      |            |
| Pc_TC034072 | 1.19  | 0.4   |      | 2.47  | 0.04      | Up   | -0.08 | 1    |      | 1.04  | 0.5   |      | terpene synthase 02                                                                    |            |
| Pc_TC034086 | 0.37  | 0.22  |      | 0.47  | 0.22      |      | -1.42 | 0.09 |      | -1.02 | 0.04  | Down | Regulator of Vps4 activity in the MVB pathway protein                                  |            |
| Pc_TC034111 | 0.33  | 0.54  |      | 1.19  | 0.05      | Up   | -2.86 | 0.01 | Down | 0.98  | 0.13  |      | glucose-6-phosphate/phosphate translocator 2                                           |            |
| Pc_TC034123 | 1.52  | 0.01  | Up   | 0.74  | 0.29      |      | 2.22  | 0.03 | Up   | 2.13  | 0     | Up   | Glycinamide ribonucleotide (GAR) synthetase                                            |            |
| Pc_TC034125 | -0.32 | 0.44  |      | -1.31 | 0.02      | Down | -0.43 | 0.64 |      | -0.29 | 0.61  |      | starch synthase 3                                                                      |            |
| Pc_TC034128 | 1.84  | 0.01  | Up   | -2.48 | 0.05      |      | 1.37  | 0.25 |      | 1.19  | 0.17  |      | glyoxalase I homolog                                                                   |            |
| Pc_TC034148 | -2.39 | 0     | Down | -3.15 | 5.27E-005 | Down | 0.82  | 0.41 |      | -2    | 0.01  | Down | photosystem II subunit R                                                               |            |
| Pc_TC034149 | 1.37  | 0.01  | Up   | 1.2   | 0.05      |      | 2.16  | 0.03 | Up   | 1.88  | 0     | Up   | photosystem II subunit R                                                               |            |
| Pc_TC034157 | -0.71 | 0.56  |      | -1.19 | 0.38      |      | -3.16 | 0.08 |      | -4.62 | 0.01  | Down | NB-ARC domain-containing disease resistance protein                                    |            |
| Pc_TC034159 | 1.87  | 0.03  | Up   | 1.4   | 0.18      |      | 2.87  | 0.02 | Up   | 1.93  | 0.04  | Up   | ASH1-related protein 2                                                                 | SET        |
| Pc_TC034168 | 0.62  | 0.11  |      | -0.87 | 0.11      |      | 0.11  | 0.91 |      | -1.4  | 0.02  | Down | N-acetylglucosamine-1-phosphate uridylyltransferase 1                                  |            |
| Pc_TC034182 | -0.74 | 0.31  |      | 2     | 0         | Up   | 0.29  | 0.8  |      | 0.15  | 0.87  |      | 26S proteasome regulatory complex,non-ATPase subcomplex,Rpn2/Psmd1 subunit             |            |
| Pc_TC034186 | 1.34  | 0.37  |      | 1.44  | 0.37      |      | 2.47  | 0.12 |      | 2.7   | 0.03  | Up   | Core-2/l-branching beta-1,6-N-acetylglucosaminyltransferase family protein             |            |
| Pc_TC034196 | 0.13  | 0.82  |      | -1.51 | 0.03      | Down | -0.44 | 0.67 |      | -0.2  | 0.77  |      | RmlC-like cupins superfamily protein                                                   |            |
| Pc_TC034222 | 0.2   | 0.84  |      | -0.46 | 0.67      |      | 1.8   | 0.12 |      | 2.22  | 0.01  | Up   | O-Glycosyl hydrolases family 17 protein                                                |            |
| Pc_TC034280 | -2.11 | 0.05  | Down | -1.36 | 0.22      |      | 1.2   | 0.31 |      | -0.02 | 1     |      | DROUGHT SENSITIVE 1                                                                    |            |
| Pc_TC034285 | -0.41 | 0.27  |      | -0.82 | 0.09      |      | 1.91  | 0.03 | Up   | 1     | 0.06  |      | adenylate kinase family protein                                                        |            |
| Pc_TC034295 | -2.34 | 0.01  | Down | 0.2   | 0.83      |      | -0.06 | 0.98 |      | -1.01 | 0.28  |      | Cyclophilin-like peptidyl-prolyl cis-trans isomerase family protein                    |            |
| Pc_TC034302 | 0.72  | 0.39  |      | -3.7  | 0.01      | Down | 0.84  | 0.51 |      | -0.09 | 0.97  |      | LRR and NB-ARC domains-containing disease resistance protein                           |            |
| Pc_TC034304 | -0.92 | 0.48  |      | 1.92  | 0.04      | Up   | -1.04 | 0.53 |      | -2.05 | 0.15  |      | Octicosapeptide/Phox/Bem1p (PB1) domain-containing protein                             |            |
| Pc_TC034323 | -1.24 | 0.67  |      | 0.06  | 1         |      | 3.16  | 0.03 | Up   | 1.63  | 0.26  |      | vacuolar protein sorting 34                                                            |            |
| Pc_TC034332 | -1.6  | ##### | Down | 1.09  | 0.01      | Up   | -0.59 | 0.5  |      | 0.44  | 0.39  |      | poly(A) binding protein 2                                                              |            |
| Pc_TC034336 | -0.78 | 0.37  |      | 1.84  | 0.02      | Up   | -0.46 | 0.72 |      | -0.84 | 0.38  |      | subunit of exocyst complex 8                                                           |            |
| Pc_TC034347 | -1.79 | 0     | Down | -1.32 | 0.03      | Down | 0.7   | 0.46 |      | 0.21  | 0.73  |      | RNAse E/G-like                                                                         |            |
| Pc_TC034424 | 0.07  | 0.83  |      | 0.29  | 0.48      |      | -1.48 | 0.09 |      | -1.42 | 0.01  | Down | ATPase E1-E2 type family protein / haloacid dehalogenase-like hydrolase family protein |            |
| Pc_TC034427 | -0.82 | 0.2   |      | -0.32 | 0.67      |      | 2.6   | 0.01 | Up   | 1.17  | 0.09  |      | polygalacturonase 2                                                                    |            |
| Pc_TC034435 | 0.8   | 0.01  |      | 0.98  | 0.01      |      | -1.68 | 0.05 | Down | 0.54  | 0.27  |      | pleiotropic drug resistance 12                                                         |            |
| Pc_TC034443 | 0.32  | 0.54  |      | 1.36  | 0.02      | Up   | -0.22 | 0.83 |      | 0.05  | 0.95  |      | Sulfite exporter TauE/SafE family protein                                              |            |
| Pc_TC034444 | 1.56  | ##### | Up   | 0.46  | 0.3       |      | -0.73 | 0.4  |      | 0.15  | 0.78  |      | Sulfite exporter TauE/SafE family protein                                              |            |
| Pc_TC034449 | 2.49  | 0.02  | Up   | 1.87  | 0.16      |      | 1.56  | 0.35 |      | 0.63  | 0.74  |      | Protein-tyrosine phosphatase-like,PTPLA                                                |            |
| Pc_TC034465 | 4.78  | 0     | Up   | 4.92  | 0         | Up   | 1.5   | 0.78 |      | 2.21  | 0.47  |      | SU(VAR)3-9 homolog 5                                                                   | SET        |
| Pc_TC034487 | 4.08  | 0.02  | Up   | 2.06  | 0.59      |      | 0.5   | 1    |      | 1.21  | 0.89  |      | Ypt/Rab-GAP domain of gyp1p superfamily protein                                        |            |
| Pc_TC034488 | 0.63  | 0.56  |      | 2.08  | 0.03      | Up   | -1.82 | 0.3  |      | -0.47 | 0.74  |      | Protein of unknown function (DUF1262)                                                  |            |
| Pc_TC034495 | 0.84  | 0.22  |      | 1.32  | 0.08      |      | -3.39 | 0.02 | Down | -2.37 | 0.02  | Down | plant U-box 18                                                                         |            |
| Pc_TC034497 | 0.72  | 0.41  |      | 2.25  | 0.01      | Up   | 0.15  | 0.94 |      | 0.69  | 0.49  |      | homeobox 1                                                                             | HB         |
| Pc_TC034503 | 0.43  | 0.78  |      | 2.27  | 0.03      | Up   | 0.21  | 0.94 |      | 1.07  | 0.36  |      | PHD finger family protein / bromo-adjacent homology (BAH) domain-containing protein    | Alfin-like |
| Pc_TC034507 | 1.24  | 0.07  |      | 1.34  | 0.08      |      | 2.16  | 0.05 | Up   | 2.36  | 0     | Up   | Lycopene beta/epsilon cyclase protein                                                  |            |
| Pc_TC034511 | -0.83 | 0.4   |      | 2.05  | 0.01      | Up   | 0.45  | 0.73 |      | 1.83  | 0.03  | Up   | 3-methylcrotonyl-CoA carboxylase                                                       |            |
| Pc_TC034513 | -0.55 | 0.26  |      | -1.33 | 0.03      | Down | -0.18 | 0.85 |      | -1.08 | 0.1   |      | dynammin-like protein 6                                                                |            |
| Pc_TC034518 | 0.86  | 0.27  |      | 2.22  | 0         | Up   | -0.14 | 0.94 |      | -0.02 | 1     |      | Histone superfamily protein                                                            | CCAAT      |
| Pc_TC034523 | -0.95 | 0.03  |      | 0.74  | 0.14      |      | -0.8  | 0.39 |      | -1.19 | 0.05  | Down | jasmonate-zim-domain protein 4                                                         | Tify       |
| Pc_TC034528 | -0.2  | 0.57  |      | -0.27 | 0.54      |      | -0.86 | 0.32 |      | -1.33 | 0.01  | Down | general regulatory factor 7                                                            |            |
| Pc_TC034530 | -2.73 | 0.27  |      | -1.75 | 0.48      |      | 2.94  | 0.04 | Up   | 2.4   | 0.03  | Up   | Uncharacterized protein                                                                |            |
| Pc_TC034540 | 0.59  | 0.74  |      | 1.16  | 0.43      |      | 3.8   | 0    | Up   | 2.86  | 0.01  | Up   | Arabinanase/levansucrase/invertase                                                     |            |
| Pc_TC034542 | -0.3  | 0.62  |      | 0.15  | 0.84      |      | 2.07  | 0.04 | Up   | 1.41  | 0.03  | Up   | myb domain protein 106                                                                 | MYB        |

|             |       |       |      |       |      |      |       |           |      |       |       |      |                                                                          |      |
|-------------|-------|-------|------|-------|------|------|-------|-----------|------|-------|-------|------|--------------------------------------------------------------------------|------|
| Pc_TC034546 | -0.36 | 0.62  |      | -0.25 | 0.77 |      | 2.26  | 0.03      | Up   | 1.12  | 0.13  |      | Nucleotide-diphospho-sugar transferases superfamily protein              |      |
| Pc_TC034548 | -0.25 | 0.46  |      | -0.34 | 0.43 |      | 2.09  | 0.01      | Up   | 1.18  | 0.02  | Up   | light-harvesting chlorophyll-protein complex I subunit A4                |      |
| Pc_TC034561 | -2.08 | 0     | Down | -1.34 | 0.04 | Down | -1.8  | 0.09      |      | -2.33 | 0     | Down | Protein of unknown function (DUF1336)                                    |      |
| Pc_TC034570 | 1.26  | 0.03  | Up   | 1.11  | 0.12 |      | -1.2  | 0.3       |      | 0.53  | 0.48  |      | chorismate mutase 2                                                      |      |
| Pc_TC034574 | 0.24  | 0.83  |      | -0.18 | 0.9  |      | 1.43  | 0.24      |      | 1.71  | 0.05  | Up   | NSP-interacting kinase 1                                                 |      |
| Pc_TC034575 | 0.25  | 0.45  |      | 0.62  | 0.14 |      | -5.15 | 5.68E-007 | Down | -1.85 | 0     | Down | Putative uncharacterized protein                                         |      |
| Pc_TC034580 | 0.58  | 0.05  |      | 0.77  | 0.05 |      | -3.11 | 0         | Down | -0.48 | 0.33  |      | trehalose-phosphatase/synthase 9                                         |      |
| Pc_TC034584 | -2.11 | 0.03  | Down | -1.84 | 0.08 |      | 1.42  | 0.21      |      | 0.25  | 0.8   |      | glutamine dumper 3                                                       |      |
| Pc_TC034590 | 0.81  | 0.13  |      | 1.19  | 0.06 |      | 0.05  | 0.97      |      | 2.16  | 0     | Up   | 4-coumarate:CoA ligase 1                                                 |      |
| Pc_TC034593 | -0.92 | 0.38  |      | 0.57  | 0.57 |      | -4.2  | 0.02      | Down | -2.27 | 0.06  |      | Plant invertase/pectin methylesterase inhibitor superfamily              |      |
| Pc_TC034611 | 0.39  | 0.18  |      | 0.37  | 0.32 |      | -2.14 | 0.01      | Down | -1.34 | 0.01  | Down | RELA/SPOT homolog 2                                                      |      |
| Pc_TC034613 | 0.78  | 0.03  |      | 0.69  | 0.14 |      | -2.55 | 0.01      | Down | -0.65 | 0.25  |      | unknown protein                                                          |      |
| Pc_TC034615 | -0.47 | 0.52  |      | 0.46  | 0.56 |      | 4.08  | 9.67E-005 | Up   | 2.86  | ##### | Up   | germin-like protein 1                                                    |      |
| Pc_TC034624 | -0.87 | 0.14  |      | -1.5  | 0.04 | Down | -0.19 | 0.86      |      | -0.41 | 0.56  |      | F-box/RNI-like superfamily protein                                       |      |
| Pc_TC034635 | 3.94  | ##### | Up   | 3.16  | 0    | Up   | 1.28  | 0.44      |      | 1.99  | 0.09  |      | glutamate decarboxylase                                                  |      |
| Pc_TC034650 | 0.53  | 0.31  |      | 0.43  | 0.49 |      | -4.69 | 0         | Down | -1.98 | 0.01  | Down | basic helix-loop-helix (bHLH) DNA-binding superfamily protein            |      |
| Pc_TC034658 | 0.39  | 0.6   |      | -0.13 | 0.91 |      | -3.79 | 0.01      | Down | -2.99 | 0.01  | Down | alpha-amylase-like                                                       |      |
| Pc_TC034662 | 0.34  | 0.8   |      | 0.47  | 0.72 |      | 1.45  | 0.27      |      | 2.02  | 0.03  | Up   | DNAJ heat shock N-terminal domain-containing protein                     |      |
| Pc_TC034667 | 1.66  | 0.36  |      | 3.17  | 0.02 | Up   | 0.24  | 1         |      | 1.74  | 0.33  |      | NAD(P)-binding Rossmann-fold superfamily protein                         |      |
| Pc_TC034679 | -0.1  | 0.96  |      | -0.18 | 0.9  |      | 2.42  | 0.04      | Up   | 1.09  | 0.23  |      | Cyclin D2;1                                                              |      |
| Pc_TC034681 | 1.45  | 0     | Up   | 1.13  | 0.04 | Up   | 0.57  | 0.55      |      | 2.13  | 0     | Up   | MATE efflux family protein                                               |      |
| Pc_TC034682 | -1.14 | 0.02  | Down | -2.15 | 0    | Down | -0.5  | 0.6       |      | -1.34 | 0.03  | Down | MATE efflux family protein                                               |      |
| Pc_TC034684 | 0.27  | 0.64  |      | 1.32  | 0.03 | Up   | -0.77 | 0.47      |      | 0.71  | 0.29  |      | signal recognition particle receptor alpha subunit family protein        |      |
| Pc_TC034685 | -1.15 | 0.02  | Down | 0.45  | 0.42 |      | -0.61 | 0.54      |      | -0.42 | 0.5   |      | signal recognition particle receptor alpha subunit family protein        |      |
| Pc_TC034694 | -1.53 | 0.05  | Down | -3.32 | 0    | Down | -1.48 | 0.22      |      | -1.66 | 0.06  |      | RNA-binding (RRM/RBD/RNP motifs) family protein                          |      |
| Pc_TC034695 | 0.34  | 0.35  |      | -0.29 | 0.54 |      | 1.27  | 0.14      |      | 1.25  | 0.02  | Up   | RNA-binding (RRM/RBD/RNP motifs) family protein                          |      |
| Pc_TC034703 | 1.79  | 0     | Up   | 1.31  | 0.06 |      | -0.16 | 0.89      |      | 1.88  | 0.01  | Up   | Aldolase-type TIM barrel family protein                                  |      |
| Pc_TC034722 | -0.51 | 1     |      | 2.72  | 0.07 |      | 3.75  | 0.02      | Up   | 2.99  | 0.03  | Up   | DNA glycosylase superfamily protein                                      |      |
| Pc_TC034723 | 2.6   | 0.04  | Up   | 2.23  | 0.13 |      | 5.18  | 0         | Up   | 3.24  | 0.01  | Up   | DNA glycosylase superfamily protein                                      |      |
| Pc_TC034744 | 0.89  | 0.07  |      | 1.27  | 0.03 | Up   | -1.33 | 0.2       |      | 0.61  | 0.34  |      | Transducin/WD40 repeat-like superfamily protein                          |      |
| Pc_TC034745 | -0.27 | 0.63  |      | -1.59 | 0.03 | Down | -1.62 | 0.13      |      | -1.31 | 0.07  |      | Transducin/WD40 repeat-like superfamily protein                          |      |
| Pc_TC034747 | 0.89  | 0.06  |      | 1.3   | 0.02 | Up   | -0.05 | 0.97      |      | 1.26  | 0.04  | Up   | S-adenosyl-L-methionine-dependent methyltransferases superfamily protein |      |
| Pc_TC034752 | -2.18 | 0.02  | Down | -0.37 | 0.71 |      | 2.2   | 0.05      | Up   | 1.25  | 0.12  |      | P-loop containing nucleoside triphosphate hydrolases superfamily protein |      |
| Pc_TC034760 | 2.32  | 0.03  | Up   | 3.23  | 0    | Up   | 2.22  | 0.13      |      | 1.68  | 0.18  |      | RNI-like superfamily protein                                             |      |
| Pc_TC034768 | -0.21 | 0.5   |      | 1.16  | 0    | Up   | -0.23 | 0.78      |      | -0.03 | 0.95  |      | heat shock protein 81-2                                                  |      |
| Pc_TC034778 | 2.36  | 0.02  | Up   | 2.61  | 0.02 | Up   | -0.72 | 0.78      |      | -1.6  | 0.44  |      | Calcium-binding EF-hand family protein                                   |      |
| Pc_TC034779 | -0.15 | 0.71  |      | -0.05 | 0.93 |      | 1.6   | 0.07      |      | 1.09  | 0.05  | Up   | alanine:glyoxylate aminotransferase                                      |      |
| Pc_TC034785 | 0.13  | 0.88  |      | 0.28  | 0.75 |      | 0.82  | 0.47      |      | 1.61  | 0.03  | Up   | indigoidine synthase A family protein                                    |      |
| Pc_TC034794 | 1.08  | 0.77  |      | 3.15  | 0.06 |      | 4.18  | 0.02      | Up   | 3.48  | 0.02  | Up   | Leucine-rich repeat protein kinase family protein                        |      |
| Pc_TC034805 | 1.24  | 0     | Up   | 1.33  | 0.01 | Up   | -0.36 | 0.71      |      | 1.84  | 0     | Up   | lipoxygenase 2                                                           |      |
| Pc_TC034806 | -0.76 | 0.31  |      | 2.16  | 0    | Up   | 0.57  | 0.62      |      | 1.94  | 0.01  | Up   | lipoxygenase 2                                                           |      |
| Pc_TC034807 | 1.5   | 0     | Up   | 1.38  | 0.02 | Up   | -1.18 | 0.26      |      | 2.01  | 0     | Up   | lipoxygenase 2                                                           |      |
| Pc_TC034826 | 0.29  | 0.81  |      | -0.02 | 1    |      | 3.01  | 0.01      | Up   | 1.79  | 0.05  |      | Photosystem II reaction center PsbP family protein                       |      |
| Pc_TC034831 | 0.42  | 0.57  |      | 1.8   | 0.02 | Up   | -2.08 | 0.11      |      | 0.04  | 0.99  |      | Concanavalin A-like lectin protein kinase family protein                 |      |
| Pc_TC034837 | -0.62 | 0.17  |      | 0.88  | 0.09 |      | -2.65 | 0.01      | Down | 0.13  | 0.83  |      | autoinhibited Ca2+ -ATPase, isoform 8                                    |      |
| Pc_TC034846 | 1.04  | 0.05  | Up   | 0.71  | 0.27 |      | -1.87 | 0.09      |      | -0.02 | 0.98  |      | myosin heavy chain-related                                               |      |
| Pc_TC034853 | -0.11 | 0.86  |      | -0.23 | 0.74 |      | 1.98  | 0.04      | Up   | 1.53  | 0.02  | Up   | chaperone protein dnaJ-related                                           |      |
| Pc_TC034860 | -0.7  | 0.11  |      | -1.64 | 0    | Down | 1.81  | 0.04      | Up   | 0.6   | 0.28  |      | ascorbate peroxidase 6                                                   |      |
| Pc_TC034875 | -1.31 | 0.01  | Down | -0.94 | 0.13 |      | 1.33  | 0.16      |      | 0.28  | 0.65  |      | PGR5-LIKE A                                                              |      |
| Pc_TC034876 | 1.4   | 0.61  |      | 3.38  | 0.04 | Up   | 1.5   | 0.6       |      | 0.63  | 0.96  |      | RPM1 interacting protein 4                                               |      |
| Pc_TC034877 | 1.37  | 0.18  |      | 2.53  | 0.01 | Up   | -0.05 | 1         |      | 1.95  | 0.06  |      | RPM1 interacting protein 4                                               |      |
| Pc_TC034895 | -0.41 | 0.32  |      | -0.32 | 0.54 |      | -1.46 | 0.12      |      | -1.78 | 0     | Down | Myzus persicae-induced lipase 1                                          |      |
| Pc_TC034906 | -0.41 | 0.64  |      | -0.09 | 0.95 |      | -2.08 | 0.12      |      | -3.18 | 0.01  | Down | Peroxidase superfamily protein                                           |      |
| Pc_TC034910 | 0.3   | 0.95  |      | -0.53 | 0.89 |      | 3.17  | 0.03      | Up   | 2.68  | 0.02  | Up   | ACT domain repeat 6                                                      |      |
| Pc_TC034927 | -1.24 | 0.02  | Down | -0.89 | 0.16 |      | -0.05 | 0.96      |      | 0.34  | 0.58  |      | basic helix-loop-helix (bHLH) DNA-binding superfamily protein            | bHLH |
| Pc_TC034941 | -0.04 | 1     |      | 0.94  | 0.27 |      | -4.71 | 0.01      | Down | -2    | 0.06  |      | Uncharacterized protein                                                  |      |
| Pc_TC034951 | 0.55  | 0.15  |      | 1.12  | 0.02 | Up   | 0.54  | 0.54      |      | 0.27  | 0.63  |      | IBR domain-containing protein                                            |      |
| Pc_TC034955 | -1.51 | 0.42  |      | 1.21  | 0.35 |      | 4.25  | 0         | Up   | 3.88  | ##### | Up   | FKBP-like peptidyl-prolyl cis-trans isomerase family protein             |      |
| Pc_TC034956 | -0.78 | 0.17  |      | -1.04 | 0.13 |      | 1.75  | 0.07      |      | 1.28  | 0.04  | Up   | FKBP-like peptidyl-prolyl cis-trans isomerase family protein             |      |
| Pc_TC034971 | 0.08  | 1     |      | 4.52  | 0.01 | Up   | 0     | 0.87      |      | 0.63  | 1     |      | winged-helix DNA-binding transcription factor family protein             | HSF  |
| Pc_TC034972 | 0.74  | 0.05  |      | 1.78  | 0    | Up   | -2.33 | 0.02      | Down | -0.52 | 0.37  |      | winged-helix DNA-binding transcription factor family protein             | HSF  |
| Pc_TC034973 | 0.01  | 1     |      | 0.13  | 0.95 |      | 2.58  | 0.03      | Up   | 1.26  | 0.18  |      | NC domain-containing protein-related                                     |      |

|             |       |       |      |       |           |      |       |           |      |       |       |      |                                                                      |         |
|-------------|-------|-------|------|-------|-----------|------|-------|-----------|------|-------|-------|------|----------------------------------------------------------------------|---------|
| Pc_TC034981 | 1.06  | 0.01  | Up   | 1.1   | 0.03      | Up   | -0.55 | 0.55      |      | 0.23  | 0.69  |      | RING/U-box superfamily protein                                       |         |
| Pc_TC034987 | 0.63  | 0.24  |      | 1.45  | 0.02      | Up   | 0.92  | 0.36      |      | 1.34  | 0.04  | Up   | ascorbate peroxidase 3                                               |         |
| Pc_TC034991 | 0.86  | 0.27  |      | 1.92  | 0.02      | Up   | -0.97 | 0.47      |      | -0.52 | 0.62  |      | RING/U-box superfamily protein                                       |         |
| Pc_TC035007 | -0.86 | 0.41  |      | -1.26 | 0.3       |      | -1.97 | 0.19      |      | -2.7  | 0.04  | Down | Arabidopsis protein of unknown function (DUF241)                     |         |
| Pc_TC035037 | 1.02  | 0.01  | Up   | 1.2   | 0.02      | Up   | -1.18 | 0.22      |      | 0.17  | 0.77  |      | Calcium-binding EF-hand family protein                               |         |
| Pc_TC035039 | 0.25  | 0.59  |      | 0.52  | 0.34      |      | -2.54 | 0.02      | Down | -0.85 | 0.18  |      | Calcium-binding EF-hand family protein                               |         |
| Pc_TC035055 | -0.05 | 1     |      | -0.28 | 0.84      |      | 2.49  | 0.03      | Up   | 1.19  | 0.19  |      | serine carboxypeptidase-like 51                                      |         |
| Pc_TC035056 | -1.62 | 0.01  | Down | -1.91 | 0.01      | Down | 1.63  | 0.1       |      | 0.94  | 0.14  |      | nodulin MtN21 /EamA-like transporter family protein                  |         |
| Pc_TC035057 | 1.73  | 0     | Up   | 1.61  | 0.03      | Up   | 0.67  | 0.55      |      | 0.63  | 0.43  |      | Domain of unknown function (DUF966)                                  |         |
| Pc_TC035061 | 2.19  | 0     | Up   | 2.22  | 0.01      | Up   | -0.21 | 0.9       |      | 0.42  | 0.67  |      | NAC domain containing protein 53                                     | NAC     |
| Pc_TC035062 | 0.39  | 0.31  |      | 1.01  | 0.03      | Up   | -0.44 | 0.63      |      | -1.3  | 0.03  | Down | NAC domain containing protein 53                                     | NAC     |
| Pc_TC035066 | 1.25  | 0.03  | Up   | 2.22  | 0         | Up   | 0.08  | 0.95      |      | 0.82  | 0.25  |      | Calcium-dependent lipid-binding (CaLB domain) family protein         |         |
| Pc_TC035068 | 1.3   | 0.08  |      | 0.18  | 0.88      |      | 0.59  | 0.64      |      | 2.06  | 0.01  | Up   | Peptidase M1 family protein                                          |         |
| Pc_TC035079 | 1.28  | 0.24  |      | 1.49  | 0.2       |      | 2.92  | 0.03      | Up   | 2.37  | 0.02  | Up   | SU(VAR)3-9 homolog 2                                                 | SET     |
| Pc_TC035090 | 1.07  | 0.03  | Up   | 0.61  | 0.32      |      | 0.24  | 0.81      |      | 0.78  | 0.22  |      | RNA-binding (RRM/RBD/RNP motifs) family protein                      |         |
| Pc_TC035092 | -1.21 | 0     | Down | 1.45  | 0         | Up   | -0.52 | 0.59      |      | -0.83 | 0.14  |      | Putative uncharacterized protein                                     |         |
| Pc_TC035118 | -2.57 | 0.01  | Down | -0.3  | 0.75      |      | -1.28 | 0.31      |      | -0.97 | 0.29  |      | PLC-like phosphodiesterases superfamily protein                      |         |
| Pc_TC035144 | -1.14 | 0.61  |      | -2.75 | 0.32      |      | 2.78  | 0.05      | Up   | 2.18  | 0.06  |      | GDSL-like Lipase/Acylhydrolase superfamily protein                   |         |
| Pc_TC035152 | -1.8  | 0.03  | Down | -1.08 | 0.22      |      | 0.34  | 0.77      |      | -1.25 | 0.15  |      | prenylated RAB acceptor 1.H                                          |         |
| Pc_TC035164 | -1.11 | 0.25  |      | -1.24 | 0.26      |      | 2.87  | 0.01      | Up   | 0.89  | 0.31  |      | transducin family protein / WD-40 repeat family protein              |         |
| Pc_TC035178 | 0.31  | 0.59  |      | 0.52  | 0.44      |      | 2.34  | 0.02      | Up   | 1.29  | 0.05  |      | FASCICLIN-like arabinogalactan 2                                     |         |
| Pc_TC035197 | 1.04  | 0.23  |      | 1.02  | 0.3       |      | -2.08 | 0.19      |      | 2.1   | 0.02  | Up   | Aldolase-type TIM barrel family protein                              |         |
| Pc_TC035198 | 1.2   | 0     | Up   | 0.64  | 0.21      |      | -1.42 | 0.14      |      | 2.67  | ##### | Up   | Aldolase-type TIM barrel family protein                              |         |
| Pc_TC035211 | 0.43  | 0.67  |      | 2.02  | 0.02      | Up   | 0.6   | 0.66      |      | 0.21  | 0.87  |      | cinnamoyl coa reductase 1                                            |         |
| Pc_TC035213 | -0.02 | 1     |      | 2.03  | 0.03      | Up   | -1.4  | 0.41      |      | -1.7  | 0.23  |      | ribosomal protein L5                                                 |         |
| Pc_TC035217 | -0.92 | 0.46  |      | -2.53 | 0.11      |      | 2.56  | 0.04      | Up   | 0.41  | 0.73  |      | Phototropic-responsive NPH3 family protein                           |         |
| Pc_TC035243 | -0.13 | 0.82  |      | -1.56 | 0.03      | Down | 0     | 1         |      | -0.02 | 0.98  |      | ERF protein                                                          |         |
| Pc_TC035267 | -0.6  | 0.21  |      | -1.53 | 0.01      | Down | 1.21  | 0.19      |      | 0.73  | 0.22  |      | Homeodomain-like superfamily protein                                 | G2-like |
| Pc_TC035275 | -0.82 | 0.26  |      | -1.45 | 0.1       |      | 3.35  | 0         | Up   | 1.59  | 0.03  | Up   | TPX2 (targeting protein for Xklp2) protein family                    |         |
| Pc_TC035276 | -1.07 | 0.28  |      | 0.01  | 1         |      | 3.91  | 0         | Up   | 2.55  | 0     | Up   | TPX2 (targeting protein for Xklp2) protein family                    |         |
| Pc_TC035280 | -0.43 | 0.64  |      | -0.4  | 0.7       |      | -4.12 | 0.01      | Down | -2    | 0.06  |      | lipid phosphate phosphatase 2                                        |         |
| Pc_TC035291 | -0.46 | 0.6   |      | -0.01 | 1         |      | -1.3  | 0.32      |      | -2.07 | 0.04  | Down | dicer-like 2                                                         |         |
| Pc_TC035294 | 0     | 0.31  |      | 0.38  | 0.97      |      | 4.39  | 0         | Up   | 2.87  | 0.02  | Up   | Protein of unknown function (DUF1637)                                |         |
| Pc_TC035305 | 0.7   | 0.05  |      | 0.82  | 0.07      |      | -0.97 | 0.28      |      | -1.14 | 0.04  | Down | Protein of unknown function (DUF833)                                 |         |
| Pc_TC035316 | -3.02 | 0     | Down | -2.04 | 0.02      | Down | -0.54 | 0.63      |      | -1.33 | 0.09  |      | Galactose mutarotase-like superfamily protein                        |         |
| Pc_TC035329 | -0.34 | 0.5   |      | -0.44 | 0.47      |      | 2.21  | 0.02      | Up   | 1.04  | 0.08  |      | Fatty acid/sphingolipid desaturase                                   |         |
| Pc_TC035336 | -0.35 | 0.34  |      | -0.78 | 0.1       |      | 1.71  | 0.05      | Up   | 0.72  | 0.17  |      | light-harvesting chlorophyll-protein complex II subunit B1           |         |
| Pc_TC035360 | 0.31  | 0.62  |      | 1.1   | 0.11      |      | -4.76 | 0         | Down | -2.05 | 0.02  | Down | Putative uncharacterized protein                                     |         |
| Pc_TC035367 | 2.66  | 0.31  |      | 1.64  | 0.75      |      | 4.83  | 0.02      | Up   | 3.63  | 0.07  |      | polyamine oxidase 1                                                  |         |
| Pc_TC035395 | 0.63  | 0.11  |      | 0.9   | 0.07      |      | -6.8  | 8.05E-008 | Down | -3.6  | ##### | Down | plant U-box 18                                                       |         |
| Pc_TC035396 | 0.36  | 0.29  |      | 0.66  | 0.12      |      | -2.01 | 0.03      | Down | -1.44 | 0.01  | Down | glycosyl hydrolase family 81 protein                                 |         |
| Pc_TC035450 | 0.65  | 0.29  |      | 1.51  | 0.03      | Up   | -1.28 | 0.27      |      | -0.08 | 0.93  |      | Protein kinase superfamily protein                                   |         |
| Pc_TC035455 | -3.35 | ##### | Down | -4.74 | 5.71E-009 | Down | -0.71 | 0.48      |      | -3.11 | ##### | Down | Pentatricopeptide repeat (PPR) superfamily protein                   |         |
| Pc_TC035465 | -2.03 | 0.03  | Down | -0.84 | 0.39      |      | -3.12 | 0.03      | Down | -2.22 | 0.03  | Down | RING/FYVE/PHD zinc finger superfamily protein                        |         |
| Pc_TC035470 | 0.69  | 0.06  |      | -1.03 | 0.05      | Down | 1.38  | 0.11      |      | 0.64  | 0.24  |      | alpha/beta-Hydrolases superfamily protein                            |         |
| Pc_TC035484 | 0.15  | 0.75  |      | -1.64 | 0.01      | Down | -1.21 | 0.23      |      | -0.52 | 0.42  |      | cinnamoyl coa reductase 1                                            |         |
| Pc_TC035495 | 0.59  | 0.4   |      | 1.52  | 0.04      | Up   | 0.29  | 0.81      |      | 0.25  | 0.78  |      | hydroxycinnamoyl-CoA shikimate/quinat hydroxycinnamoyl transferase   |         |
| Pc_TC035496 | -0.44 | 0.37  |      | -0.05 | 0.94      |      | 2.35  | 0.01      | Up   | 1.3   | 0.03  | Up   | Cellulose synthase family protein                                    |         |
| Pc_TC035498 | -1.14 | 0.42  |      | -0.94 | 0.54      |      | 3.71  | 0         | Up   | 2.08  | 0.03  | Up   | Eukaryotic aspartyl protease family protein                          |         |
| Pc_TC035500 | 0.06  | 0.91  |      | -0.55 | 0.36      |      | 0.55  | 0.56      |      | -1.36 | 0.04  | Down | Adenosylmethionine decarboxylase family protein                      |         |
| Pc_TC035507 | 0.49  | 0.52  |      | 1.63  | 0.04      | Up   | -3.08 | 0.03      | Down | -1.18 | 0.22  |      | trehalose phosphatase/synthase 11                                    |         |
| Pc_TC035527 | -2.12 | ##### | Down | -2.14 | 0         | Down | 1.34  | 0.13      |      | -0.98 | 0.1   |      | Dormancy/auxin associated family protein                             |         |
| Pc_TC035542 | 0.26  | 0.66  |      | 1.09  | 0.09      |      | -3.76 | 0         | Down | -2.79 | 0     | Down | Subtilase family protein                                             |         |
| Pc_TC035548 | 0.2   | 0.8   |      | 1.47  | 0.05      | Up   | -0.72 | 0.55      |      | 0.05  | 0.97  |      | Keratin,high sulphur B2 protein (InterPro:IPR002494)                 |         |
| Pc_TC035577 | -1.76 | 0.01  | Down | 0.42  | 0.53      |      | -0.56 | 0.6       |      | -0.8  | 0.27  |      | ethylene-forming enzyme                                              |         |
| Pc_TC035586 | 0.41  | 0.2   |      | 0.79  | 0.05      |      | -2.25 | 0.01      | Down | -0.88 | 0.09  |      | Galactosyltransferase family protein                                 |         |
| Pc_TC035588 | 0.38  | 0.48  |      | 0.12  | 0.86      |      | -1.56 | 0.15      |      | -1.6  | 0.03  | Down | annexin 8                                                            |         |
| Pc_TC035594 | 2.6   | ##### | Up   | 1.98  | 0         | Up   | 0.58  | 0.6       |      | 0.64  | 0.39  |      | Pyridoxal phosphate (PLP)-dependent transferases superfamily protein |         |
| Pc_TC035603 | 0.58  | 0.27  |      | 1.34  | 0.03      | Up   | -0.9  | 0.39      |      | 0.07  | 0.92  |      | heat shock factor 4                                                  | HSF     |
| Pc_TC035613 | -0.36 | 0.78  |      | 0.4   | 0.75      |      | -4.74 | 0.03      | Down | -0.62 | 0.62  |      | Uncharacterized protein                                              |         |
| Pc_TC035618 | -0.87 | 0.09  |      | -1.45 | 0.02      | Down | 0.22  | 0.83      |      | -0.05 | 0.94  |      | DNAJ heat shock N-terminal domain-containing protein                 |         |
| Pc_TC035619 | 2.49  | 0     | Up   | 3.69  | 9.91E-006 | Up   | -2.08 | 0.24      |      | -0.58 | 0.68  |      | alpha/beta-Hydrolases superfamily protein                            |         |

|             |       |       |      |       |           |      |       |      |      |       |      |      |                                                                         |     |
|-------------|-------|-------|------|-------|-----------|------|-------|------|------|-------|------|------|-------------------------------------------------------------------------|-----|
| Pc_TC035629 | 1.58  | 0.04  | Up   | 0.99  | 0.3       |      | 3.78  | 0    | Up   | 2.94  | 0    | Up   | Protein of unknown function,DUF547                                      |     |
| Pc_TC035634 | -0.3  | 0.62  |      | 1.37  | 0.03      | Up   | 0.36  | 0.73 |      | -0.7  | 0.33 |      | beta carbonic anhydrase 5                                               |     |
| Pc_TC035655 | -0.18 | 0.66  |      | -1.3  | 0.02      | Down | 0.78  | 0.38 |      | 0.73  | 0.18 |      | homeobox protein 5                                                      |     |
| Pc_TC035683 | 0.63  | 0.09  |      | 0.97  | 0.04      |      | -1.9  | 0.04 | Down | -0.88 | 0.12 |      | O-fucosyltransferase family protein                                     |     |
| Pc_TC035690 | -1.65 | 0.05  |      | -4.08 | 0         | Down | 0.98  | 0.39 |      | -0.35 | 0.7  |      | cellulose synthase like E1                                              |     |
| Pc_TC035691 | -1.53 | 0     | Down | -4.11 | 1.06E-008 | Down | 0.96  | 0.3  |      | -0.25 | 0.68 |      | cellulose synthase like E1                                              |     |
| Pc_TC035692 | -0.47 | 0.61  |      | 1.25  | 0.14      |      | 3.42  | 0    | Up   | 2.1   | 0.01 | Up   | cellulose synthase like E1                                              |     |
| Pc_TC035708 | 2.14  | 0.02  | Up   | 2.47  | 0.01      | Up   | -0.38 | 0.86 |      | 0.9   | 0.45 |      | Eukaryotic aspartyl protease family protein                             |     |
| Pc_TC035716 | 0.27  | 0.67  |      | 0.14  | 0.86      |      | -1.38 | 0.22 |      | -2.26 | 0.01 | Down | Calcium-binding EF-hand family protein                                  |     |
| Pc_TC035726 | -1.38 | 0.08  |      | 0.3   | 0.72      |      | -3.08 | 0.02 | Down | -1.66 | 0.06 |      | Expressed protein                                                       |     |
| Pc_TC035730 | 0.57  | 0.15  |      | 1.24  | 0.01      | Up   | -1.42 | 0.14 |      | -0.72 | 0.23 |      | RmlC-like cupins superfamily protein                                    |     |
| Pc_TC035733 | 0.3   | 0.77  |      | 1.87  | 0.03      | Up   | 0.59  | 0.66 |      | 1.82  | 0.03 | Up   | Ribosomal protein L6 family                                             |     |
| Pc_TC035755 | -3.38 | ##### | Down | -0.99 | 0.17      |      | -0.54 | 0.61 |      | -1.08 | 0.14 |      | NAD(P)-binding Rossmann-fold superfamily protein                        |     |
| Pc_TC035762 | 0.42  | 0.38  |      | 1.2   | 0.03      | Up   | 0.11  | 0.92 |      | -0.42 | 0.52 |      | Chitinase family protein                                                |     |
| Pc_TC035763 | 0.93  | 0.2   |      | 1.67  | 0.03      | Up   | -1.68 | 0.21 |      | -1.03 | 0.28 |      | Putative uncharacterized protein                                        |     |
| Pc_TC035767 | -0.66 | 0.1   |      | -1.03 | 0.04      | Down | 0.52  | 0.56 |      | 0.19  | 0.73 |      | pumilio 5                                                               |     |
| Pc_TC035775 | -1.3  | 0.02  | Down | -0.45 | 0.49      |      | 0.69  | 0.48 |      | 0.39  | 0.54 |      | RNA-binding KH domain-containing protein                                |     |
| Pc_TC035782 | -4.17 | 0.02  | Down | -4.19 | 0.03      | Down | 0.5   | 0.73 |      | -1.04 | 0.4  |      | Auxin-responsive family protein                                         |     |
| Pc_TC035792 | 1.62  | 0     | Up   | 2.19  | 0         | Up   | 0.67  | 0.53 |      | 1.67  | 0.02 | Up   | UDP-D-glucuronate 4-epimerase 6                                         |     |
| Pc_TC035793 | 1.25  | 0     | Up   | 1.75  | 0         | Up   | 0.81  | 0.39 |      | 1.28  | 0.03 | Up   | Cyclin family protein                                                   |     |
| Pc_TC035796 | -0.33 | 0.37  |      | -1.22 | 0.01      | Down | -0.12 | 0.89 |      | -0.2  | 0.71 |      | Cyclin family protein                                                   |     |
| Pc_TC035831 | 1.09  | 0.09  |      | -1.92 | 0.05      | Down | -0.62 | 0.6  |      | 0.03  | 0.99 |      | beta glucosidase 11                                                     |     |
| Pc_TC035832 | 1.06  | 0.01  | Up   | 0.63  | 0.25      |      | 0.2   | 0.84 |      | 1.37  | 0.02 | Up   | beta glucosidase 11                                                     |     |
| Pc_TC035833 | 0.33  | 0.38  |      | -1.15 | 0.03      | Down | -0.01 | 0.99 |      | 0.62  | 0.25 |      | beta glucosidase 11                                                     |     |
| Pc_TC035837 | 0.27  | 0.37  |      | 0.44  | 0.25      |      | -1.45 | 0.08 |      | -1.01 | 0.04 | Down | WW-domain-binding protein (InterPro:IPR018826)                          |     |
| Pc_TC035839 | -0.67 | 0.05  |      | -1.31 | 0         | Down | -1.38 | 0.11 |      | -1.4  | 0.01 | Down | ankyrin repeat-containing protein 2                                     |     |
| Pc_TC035872 | 0.93  | 0.13  |      | 1.11  | 0.12      |      | 1.2   | 0.26 |      | 2.05  | 0    | Up   | Disease resistance protein (CC-NBS-LRR class) family                    |     |
| Pc_TC035875 | 0.9   | 0.31  |      | 2.09  | 0.02      | Up   | -4.89 | 0.02 | Down | -2.18 | 0.09 |      | Uridine diphosphate glycosyltransferase 74E2                            |     |
| Pc_TC035876 | 0.78  | 0.09  |      | 0.36  | 0.54      |      | -2.88 | 0.01 | Down | -0.43 | 0.5  |      | Uridine diphosphate glycosyltransferase 74E2                            |     |
| Pc_TC035889 | 0.06  | 0.89  |      | 0.07  | 0.89      |      | 1.84  | 0.04 | Up   | 1.01  | 0.06 |      | hydroxymethylglutaryl-CoA synthase                                      |     |
| Pc_TC035906 | 1.37  | 0.03  | Up   | 1.87  | 0.01      | Up   | -1.23 | 0.31 |      | -0.37 | 0.67 |      | winged-helix DNA-binding transcription factor family protein            | HSF |
| Pc_TC035940 | 0.43  | 0.52  |      | -2.41 | 0.01      | Down | 2.28  | 0.03 | Up   | 1.31  | 0.07 |      | DNA photolyases;DNA photolyases                                         |     |
| Pc_TC035959 | 0.38  | 0.44  |      | -0.29 | 0.64      |      | 1.55  | 0.1  |      | 1.61  | 0.01 | Up   | Major facilitator superfamily protein                                   |     |
| Pc_TC035966 | 0.58  | 0.43  |      | 0.62  | 0.46      |      | -3.02 | 0.03 | Down | -2.44 | 0.02 | Down | Uncharacterized protein                                                 |     |
| Pc_TC035970 | -1.23 | 0.05  | Down | -0.25 | 0.72      |      | 0.16  | 0.89 |      | 0.05  | 0.95 |      | GDSL-like Lipase/Acylhydrolase superfamily protein                      |     |
| Pc_TC035974 | -0.36 | 0.56  |      | -0.82 | 0.27      |      | 2.19  | 0.03 | Up   | 1.83  | 0.01 | Up   | plasma membrane intrinsic protein 2;8                                   |     |
| Pc_TC035979 | 0.45  | 0.12  |      | 0.44  | 0.23      |      | -1.7  | 0.04 | Down | -0.65 | 0.18 |      | Eukaryotic aspartyl protease family protein                             |     |
| Pc_TC035982 | -1.2  | 0.05  |      | -1.53 | 0.04      | Down | 1.41  | 0.16 |      | 0.54  | 0.42 |      | Protein of unknown function (DUF630 and DUF632)                         |     |
| Pc_TC035986 | 1.38  | 0.11  |      | 2.1   | 0.02      | Up   | -1.78 | 0.28 |      | 1.96  | 0.03 | Up   | hydroxycinnamoyl-CoA shikimate/quinic acid hydroxycinnamoyl transferase |     |
| Pc_TC035987 | 1.12  | 0.1   |      | 1.81  | 0.02      | Up   | -1.13 | 0.37 |      | 1.07  | 0.18 |      | hydroxycinnamoyl-CoA shikimate/quinic acid hydroxycinnamoyl transferase |     |
| Pc_TC035995 | -0.05 | 0.99  |      | -0.86 | 0.42      |      | 2.64  | 0.02 | Up   | 1.96  | 0.01 | Up   | SAUR-like auxin-responsive protein family                               |     |
| Pc_TC035996 | 1.08  | 0.4   |      | 0.38  | 0.87      |      | 3.55  | 0.01 | Up   | 2.46  | 0.02 | Up   | SAUR-like auxin-responsive protein family                               |     |
| Pc_TC035997 | -1.51 | 0.77  |      | 0     | 0.48      |      | 3.44  | 0.04 | Up   | 2.21  | 0.17 |      | SAUR-like auxin-responsive protein family                               |     |
| Pc_TC036000 | 1.66  | 0.72  |      | 1.64  | 0.75      |      | 3.59  | 0.13 |      | 3.87  | 0.04 | Up   | Os09g0552400 protein                                                    |     |
| Pc_TC036001 | 0.08  | 0.98  |      | -0.64 | 0.58      |      | 2.76  | 0.02 | Up   | 1.73  | 0.04 | Up   | SAUR-like auxin-responsive protein family                               |     |
| Pc_TC036010 | -0.14 | 0.78  |      | -0.66 | 0.29      |      | 2.15  | 0.02 | Up   | 1.1   | 0.07 |      | flavin-dependent monooxygenase 1                                        |     |
| Pc_TC036011 | 0.82  | 0.79  |      | 2.17  | 0.21      |      | 3.56  | 0.03 | Up   | 2.29  | 0.15 |      | flavin-dependent monooxygenase 1                                        |     |
| Pc_TC036012 | 0.95  | 0.54  |      | 0.64  | 0.76      |      | 1.87  | 0.24 |      | 2.56  | 0.03 | Up   | flavin-dependent monooxygenase 1                                        |     |
| Pc_TC036016 | -0.81 | 0.43  |      | -3.06 | 0.03      | Down | -1.74 | 0.24 |      | -2.27 | 0.06 |      | Ribosomal L18p/L5e family protein                                       |     |
| Pc_TC036021 | 0.61  | 0.52  |      | -1.94 | 0.17      |      | 1.11  | 0.39 |      | 2.11  | 0.02 | Up   | S-locus lectin protein kinase family protein                            |     |
| Pc_TC036033 | -0.65 | 0.23  |      | -1.78 | 0.01      | Down | -0.22 | 0.83 |      | -0.2  | 0.76 |      | quinolinate phosphoribosyltransferase                                   |     |
| Pc_TC036038 | -0.6  | 0.79  |      | 0.23  | 0.97      |      | 0.09  | 1    |      | 2.24  | 0.04 | Up   | Auxin efflux carrier family protein                                     |     |
| Pc_TC036051 | 0.35  | 0.59  |      | 1.15  | 0.1       |      | 1     | 0.35 |      | 1.92  | 0.01 | Up   | CysteinyI-tRNA synthetase,class Ia family protein                       |     |
| Pc_TC036053 | -0.86 | 0.29  |      | -2.13 | 0.04      | Down | -0.44 | 0.72 |      | -1.16 | 0.21 |      | Mitochondrial glycoprotein family protein                               |     |
| Pc_TC036067 | 0.52  | 0.48  |      | 1.72  | 0.02      | Up   | -0.87 | 0.49 |      | 0.15  | 0.88 |      | ARM repeat superfamily protein                                          |     |
| Pc_TC036085 | -0.74 | 0.09  |      | -1.32 | 0.02      | Down | 1.17  | 0.19 |      | 0.44  | 0.44 |      | TCOP-1/cpn60 chaperonin family protein                                  |     |
| Pc_TC036123 | 1.66  | 0.16  |      | 3.18  | 0         | Up   | 1.28  | 0.44 |      | 1.68  | 0.18 |      | Calcium-dependent lipid-binding (CaLB domain) family protein            |     |
| Pc_TC036126 | 0.13  | 0.72  |      | 1.6   | 0         | Up   | -0.26 | 0.77 |      | -0.01 | 0.98 |      | ABC transporter family protein                                          |     |
| Pc_TC036151 | 0.66  | 0.72  |      | 1.47  | 0.31      |      | 3.38  | 0.02 | Up   | 1.43  | 0.3  |      | peroxidase 2                                                            |     |
| Pc_TC036153 | -2.24 | 0.04  | Down | 0     | 0         |      | 0.06  | 0.99 |      | -2.11 | 0.06 |      | Peroxidase superfamily protein                                          |     |
| Pc_TC036168 | -1.03 | 0.12  |      | -1.65 | 0.04      | Down | 0.6   | 0.57 |      | -1.59 | 0.04 | Down | purple acid phosphatase 3                                               |     |
| Pc_TC036175 | -0.5  | 0.41  |      | -0.11 | 0.88      |      | -1.56 | 0.16 |      | -1.85 | 0.02 | Down | SEC14-like 3                                                            |     |

|             |       |       |      |       |           |      |       |           |      |       |       |      |                                                                                           |       |
|-------------|-------|-------|------|-------|-----------|------|-------|-----------|------|-------|-------|------|-------------------------------------------------------------------------------------------|-------|
| Pc_TC036199 | 2.19  | 0.01  | Up   | 0.64  | 0.63      |      | 1.17  | 0.42      |      | 1.29  | 0.24  |      | Uncharacterized protein                                                                   |       |
| Pc_TC036218 | 1.35  | 0.03  | Up   | -0.28 | 0.74      |      | 0.69  | 0.53      |      | 1.65  | 0.02  | Up   | Glycosyl hydrolase family 38 protein                                                      |       |
| Pc_TC036231 | 0.16  | 0.83  |      | -0.07 | 0.95      |      | 1.24  | 0.25      |      | 1.5   | 0.04  | Up   | Leucine-rich repeat protein kinase family protein                                         |       |
| Pc_TC036241 | -0.99 | 0.03  |      | 0.45  | 0.4       |      | 1.78  | 0.05      | Up   | 1.06  | 0.06  |      | proline-rich protein 4                                                                    |       |
| Pc_TC036242 | 1.39  | 0.04  | Up   | 1.83  | 0.02      | Up   | 3.74  | 0         | Up   | 3.41  | ##### | Up   | Os10g0150700 protein                                                                      |       |
| Pc_TC036244 | -0.41 | 0.42  |      | 1.19  | 0.03      | Up   | 1.39  | 0.14      |      | 0.98  | 0.11  |      | Os10g0150800 protein                                                                      |       |
| Pc_TC036264 | 0     | 0.64  |      | 0.06  | 1         |      | 5.36  | 0         | Up   | 3.53  | 0.02  | Up   | beta-1,3-glucanase putative                                                               |       |
| Pc_TC036290 | -2.28 | 0     | Down | -0.26 | 0.75      |      | -1.77 | 0.13      |      | -1.82 | 0.03  | Down | Disease resistance protein (CC-NBS-LRR class) family                                      |       |
| Pc_TC036298 | -0.07 | 0.82  |      | -0.39 | 0.33      |      | -0.73 | 0.38      |      | -1.03 | 0.04  | Down | phosphoglucomutase                                                                        |       |
| Pc_TC036308 | 1.08  | 0.65  |      | 1.64  | 0.41      |      | 4.05  | 0.01      | Up   | 3.53  | 0.01  | Up   | UDP-Glycosyltransferase superfamily protein                                               |       |
| Pc_TC036313 | -0.51 | 1     |      | 2.38  | 0.15      |      | 3.5   | 0.03      | Up   | 2.95  | 0.04  | Up   | unknown protein                                                                           |       |
| Pc_TC036330 | -4.57 | 0     | Down | -1.26 | 0.3       |      | -0.82 | 0.57      |      | -1.32 | 0.25  |      | riboflavin kinase/FMN hydrolase                                                           |       |
| Pc_TC036347 | -0.25 | 0.65  |      | -1.81 | 0.01      | Down | 0     | 1         |      | -0.76 | 0.27  |      | beta glucosidase 40                                                                       |       |
| Pc_TC036352 | 0.48  | 0.63  |      | 2.54  | 0         | Up   | -1.5  | 0.32      |      | 0.3   | 0.8   |      | Uncharacterized protein                                                                   |       |
| Pc_TC036365 | 0.97  | 0.22  |      | 1.16  | 0.2       |      | -0.26 | 0.87      |      | 1.69  | 0.05  | Up   | cellulose synthase-like B4                                                                |       |
| Pc_TC036386 | -0.2  | 0.55  |      | 1.44  | 0         | Up   | -0.33 | 0.7       |      | -0.36 | 0.47  |      | Uncharacterized protein (Fragment)                                                        |       |
| Pc_TC036388 | -1.81 | 0.04  | Down | -0.77 | 0.41      |      | 0.43  | 0.72      |      | -1.32 | 0.16  |      | Photosystem I,PsaA/PsaB protein                                                           |       |
| Pc_TC036409 | 0.24  | 0.57  |      | 0.55  | 0.29      |      | -2.97 | 0         | Down | -1.73 | 0.01  | Down | myo-inositol-1-phosphate synthase 2                                                       |       |
| Pc_TC036417 | 0.2   | 0.87  |      | 0.86  | 0.39      |      | -5.02 | 0.01      | Down | -3.9  | 0.01  | Down | Expressed protein                                                                         |       |
| Pc_TC036425 | -1.67 | 0.06  |      | 2.18  | 0         | Up   | 0.04  | 0.99      |      | 0.8   | 0.33  |      | Outer arm dynein light chain 1 protein                                                    |       |
| Pc_TC036426 | 1.28  | 0     | Up   | 2.02  | 0         | Up   | 0.24  | 0.81      |      | 0.9   | 0.15  |      | Outer arm dynein light chain 1 protein                                                    |       |
| Pc_TC036428 | 0.11  | 0.79  |      | 0.07  | 0.89      |      | -1.97 | 0.04      | Down | 0.08  | 0.89  |      | Outer arm dynein light chain 1 protein                                                    |       |
| Pc_TC036435 | 5.38  | ##### | Up   | 6.01  | 1.64E-007 | Up   | 2.9   | 0.15      |      | 4.35  | 0     | Up   | hydroxycinnamoyl-CoA shikimate/quinato hydroxycinnamoyl transferase                       |       |
| Pc_TC036436 | 1.54  | 0.05  | Up   | 1.85  | 0.03      | Up   | -0.76 | 0.6       |      | 0.4   | 0.71  |      | hydroxycinnamoyl-CoA shikimate/quinato hydroxycinnamoyl transferase                       |       |
| Pc_TC036449 | 0.94  | 0.04  |      | 1.25  | 0.03      | Up   | -0.95 | 0.35      |      | 0.1   | 0.88  |      | Expressed protein                                                                         |       |
| Pc_TC036460 | -0.09 | 1     |      | 0.06  | 1         |      | 3.19  | 0.02      | Up   | 1.81  | 0.1   |      | glutathione S-transferase TAU 18                                                          |       |
| Pc_TC036509 | 0.8   | 0.03  |      | 0.56  | 0.24      |      | 0.74  | 0.4       |      | 1.89  | 0     | Up   | Uncharacterized protein                                                                   |       |
| Pc_TC036515 | -2.21 | 0.03  | Down | -1.23 | 0.23      |      | 1.56  | 0.17      |      | 0.15  | 0.89  |      | histone H2A 11                                                                            | CCAAT |
| Pc_TC036522 | 0.4   | 0.27  |      | 0.81  | 0.07      |      | -2.27 | 0.02      | Down | -1.39 | 0.01  | Down | heat shock transcription factor A6B                                                       | HSF   |
| Pc_TC036523 | 0.41  | 0.27  |      | 0.7   | 0.13      |      | -2.26 | 0.02      | Down | -1.13 | 0.05  | Down | heat shock transcription factor A6B                                                       | HSF   |
| Pc_TC036524 | 0.31  | 0.47  |      | 0.8   | 0.12      |      | -3.23 | 0         | Down | -2.03 | 0     | Down | heat shock transcription factor A6B                                                       | HSF   |
| Pc_TC036561 | 0.63  | 0.09  |      | 1.04  | 0.02      | Up   | -0.88 | 0.33      |      | 0.19  | 0.73  |      | Heavy metal transport/detoxification superfamily protein                                  |       |
| Pc_TC036574 | 0.63  | 0.11  |      | 1.03  | 0.03      | Up   | -0.42 | 0.65      |      | 1.18  | 0.03  | Up   | phosphate transporter 1;4                                                                 |       |
| Pc_TC036581 | 0.71  | 0.57  |      | -0.4  | 0.85      |      | -1.15 | 0.55      |      | 2.07  | 0.04  | Up   | Divalent ion symporter                                                                    |       |
| Pc_TC036585 | -1.92 | 0.24  |      | 0.06  | 1         |      | 1.62  | 0.24      |      | 2.64  | 0.01  | Up   | Divalent ion symporter                                                                    |       |
| Pc_TC036588 | 0.53  | 0.13  |      | -0.01 | 0.98      |      | -1.25 | 0.16      |      | -1.39 | 0.01  | Down | Expressed protein                                                                         |       |
| Pc_TC036589 | 0.57  | 0.2   |      | 0.21  | 0.71      |      | -1.33 | 0.18      |      | -1.31 | 0.04  | Down | Expressed protein                                                                         |       |
| Pc_TC036591 | 1.03  | 0.05  | Up   | 0.45  | 0.48      |      | 0.3   | 0.77      |      | 0.03  | 0.97  |      | Expressed protein                                                                         |       |
| Pc_TC036592 | 1.4   | 0.03  | Up   | 1.06  | 0.17      |      | -1.18 | 0.34      |      | -0.52 | 0.56  |      | Putative uncharacterized protein                                                          |       |
| Pc_TC036596 | -0.68 | 0.34  |      | -1.82 | 0.04      | Down | 0.2   | 0.87      |      | -0.78 | 0.33  |      | Expressed protein                                                                         |       |
| Pc_TC036598 | 0.06  | 0.87  |      | -1.16 | 0.02      | Down | 0.46  | 0.59      |      | -0.43 | 0.43  |      | Expressed protein                                                                         |       |
| Pc_TC036609 | 0.44  | 0.45  |      | 1.31  | 0.04      | Up   | -0.58 | 0.59      |      | 0.11  | 0.89  |      | CHY-type/CTCOHY-type/RING-type Zinc finger protein                                        |       |
| Pc_TC036636 | 0.08  | 0.88  |      | 0.01  | 0.99      |      | 2.07  | 0.03      | Up   | 1.11  | 0.08  |      | Cellulose synthase family protein                                                         |       |
| Pc_TC036643 | 0.82  | 0.43  |      | 1.77  | 0.07      |      | 0.12  | 0.98      |      | 2.65  | 0     | Up   | Fatty acid hydroxylase superfamily                                                        |       |
| Pc_TC036655 | 0.53  | 0.7   |      | 2.12  | 0.04      | Up   | 1.5   | 0.29      |      | 1.25  | 0.27  |      | fatty alcohol oxidase 3                                                                   |       |
| Pc_TC036683 | 0.76  | 0.71  |      | 2.91  | 0.02      | Up   | -1.23 | 0.68      |      | 0.47  | 0.87  |      | Os10g0487200 protein                                                                      |       |
| Pc_TC036707 | -1.65 | 0.01  | Down | -1.63 | 0.04      | Down | -1.73 | 0.13      |      | -0.89 | 0.23  |      | homolog of yeast CDT1 A                                                                   |       |
| Pc_TC036712 | -0.64 | 0.06  |      | -1.32 | 0         | Down | 2.3   | 0.01      | Up   | 1.21  | 0.02  | Up   | translocon at the inner envelope membrane of chloroplasts 110                             |       |
| Pc_TC036713 | -0.73 | 0.11  |      | -1.87 | 0         | Down | 2.06  | 0.02      | Up   | 1.03  | 0.07  |      | translocon at the inner envelope membrane of chloroplasts 110                             |       |
| Pc_TC036714 | -0.65 | 0.08  |      | -1.44 | 0         | Down | 2.35  | 0.01      | Up   | 1.29  | 0.01  | Up   | translocon at the inner envelope membrane of chloroplasts 110                             |       |
| Pc_TC036730 | -1.62 | 0.01  | Down | -0.81 | 0.27      |      | 1.6   | 0.11      |      | 0.31  | 0.66  |      | protochlorophyllide oxidoreductase A                                                      |       |
| Pc_TC036749 | -0.33 | 0.62  |      | -0.42 | 0.58      |      | 2.56  | 0.01      | Up   | 1.36  | 0.05  | Up   | unknown protein                                                                           |       |
| Pc_TC036774 | -0.51 | 1     |      | 3.06  | 0.03      | Up   | -1.08 | 0.83      |      | 0.85  | 0.76  |      | Bifunctional inhibitor/lipid-transfer protein/seed storage 2S albumin superfamily protein |       |
| Pc_TC036775 | 0.62  | 0.24  |      | 2     | 0         | Up   | -7.03 | 4.31E-006 | Down | -2.78 | 0     | Down | OSINBa0084N21.6 protein                                                                   |       |
| Pc_TC036782 | -0.14 | 0.98  |      | 1.16  | 0.29      |      | 3.6   | 0         | Up   | 2.33  | 0.01  | Up   | Cupredoxin superfamily protein                                                            |       |
| Pc_TC036790 | 0.15  | 0.62  |      | -0.03 | 0.93      |      | -1.17 | 0.16      |      | -1.73 | 0     | Down | actin 7                                                                                   |       |
| Pc_TC036792 | 0.21  | 0.81  |      | -0.78 | 0.42      |      | 2.6   | 0.02      | Up   | 1.85  | 0.02  | Up   | S-adenosyl-L-methionine-dependent methyltransferases superfamily protein                  |       |
| Pc_TC036793 | 0.4   | 0.37  |      | 1.32  | 0.01      | Up   | 1.05  | 0.26      |      | 1.41  | 0.02  | Up   | S-adenosyl-L-methionine-dependent methyltransferases superfamily protein                  |       |
| Pc_TC036795 | 0.7   | 0.14  |      | 1.67  | 0         | Up   | -0.93 | 0.36      |      | -0.58 | 0.38  |      | Uncharacterized protein                                                                   |       |
| Pc_TC036799 | -1.65 | 0     | Down | -1.1  | 0.09      |      | 0.57  | 0.56      |      | 0.34  | 0.59  |      | Serine carboxypeptidase S28 family protein                                                |       |
| Pc_TC036800 | 1.82  | 0     | Up   | 1.82  | 0.01      | Up   | -0.4  | 0.75      |      | 1.28  | 0.09  |      | Serine carboxypeptidase S28 family protein                                                |       |
| Pc_TC036807 | 0.72  | 0.26  |      | 1.42  | 0.04      | Up   | -0.99 | 0.4       |      | 0.33  | 0.68  |      | Cytochrome P450 superfamily protein                                                       |       |



|             |       |       |      |       |           |      |       |      |      |       |      |      |                                                                         |      |
|-------------|-------|-------|------|-------|-----------|------|-------|------|------|-------|------|------|-------------------------------------------------------------------------|------|
| Pc_TC036813 | 0.64  | 0.19  |      | 0.88  | 0.13      |      | -2.12 | 0.05 | Down | -1.25 | 0.07 |      | cytochrome P450, family 89, subfamily A, polypeptide 5                  |      |
| Pc_TC036814 | 0.93  | 0.12  |      | 1.84  | 0.01      | Up   | -1.64 | 0.16 |      | -0.72 | 0.37 |      | Cytochrome P450 superfamily protein                                     |      |
| Pc_TC036815 | -0.36 | 0.28  |      | -0.63 | 0.15      |      | 2.09  | 0.01 | Up   | 1.17  | 0.02 | Up   | Single hybrid motif superfamily protein                                 |      |
| Pc_TC036821 | 1.78  | 0.04  | Up   | 1.1   | 0.3       |      | 0.41  | 0.8  |      | 1.35  | 0.17 |      | Protein of unknown function, DUF538                                     |      |
| Pc_TC036838 | 0.37  | 0.44  |      | 0.57  | 0.32      |      | -1.44 | 0.16 |      | -1.76 | 0.01 | Down | RHOMBOID-like 2                                                         |      |
| Pc_TC036850 | -1.82 | 0.05  |      | -4.3  | 0         | Down | -2.85 | 0.05 | Down | -2.92 | 0.01 | Down | 2-oxoglutarate (2OG) and Fe(II)-dependent oxygenase superfamily protein |      |
| Pc_TC036858 | 1.63  | 0.01  | Up   | 1.91  | 0.01      | Up   | -2.43 | 0.06 |      | 0.06  | 0.96 |      | phospholipase D beta 1                                                  |      |
| Pc_TC036868 | 1.74  | 0.06  |      | 2.06  | 0.04      | Up   | -0.39 | 0.85 |      | 0.78  | 0.51 |      | glutathione S-transferase TAU 20                                        |      |
| Pc_TC036891 | 0.17  | 0.81  |      | 0.78  | 0.29      |      | 2.04  | 0.05 |      | 1.82  | 0.01 | Up   | hercules receptor kinase 1                                              |      |
| Pc_TC036892 | 1.9   | 0     | Up   | 0.45  | 0.6       |      | -1.15 | 0.35 |      | 0.64  | 0.43 |      | Expressed protein                                                       |      |
| Pc_TC036896 | 0.42  | 0.5   |      | -0.35 | 0.65      |      | -3    | 0.02 | Down | -2    | 0.02 | Down | Expressed protein                                                       |      |
| Pc_TC036897 | 1.49  | 0.06  |      | 2.52  | 0         | Up   | -1.5  | 0.31 |      | -0.2  | 0.88 |      | Eukaryotic aspartyl protease family protein, expressed                  |      |
| Pc_TC036898 | 1.27  | 0.02  | Up   | 0.31  | 0.68      |      | 0.68  | 0.52 |      | 1.96  | 0    | Up   | PLAC8 family protein                                                    |      |
| Pc_TC036907 | 0.44  | 0.14  |      | 0.65  | 0.09      |      | -1.92 | 0.02 | Down | -0.64 | 0.2  |      | tobamovirus multiplication protein 3                                    |      |
| Pc_TC036919 | -1.62 | ##### | Down | -1.05 | 0.03      | Down | -2.98 | 0    | Down | -1.74 | 0    | Down | ubiquitin family protein                                                |      |
| Pc_TC036920 | 0.37  | 0.4   |      | -1.24 | 0.04      | Down | -0.33 | 0.73 |      | 0.26  | 0.66 |      | ubiquitin family protein                                                |      |
| Pc_TC036934 | -0.4  | 0.45  |      | -1.61 | 0.02      | Down | 1.91  | 0.05 | Up   | 1.35  | 0.03 | Up   | unknown protein                                                         |      |
| Pc_TC036950 | -0.52 | 0.4   |      | -1.22 | 0.1       |      | -2.48 | 0.03 | Down | -2.31 | 0    | Down | NAD(P)-binding Rossmann-fold superfamily protein                        |      |
| Pc_TC036951 | -0.58 | 0.33  |      | -1.6  | 0.03      | Down | -2.46 | 0.03 | Down | -0.1  | 0.89 |      | NAD(P)-binding Rossmann-fold superfamily protein                        |      |
| Pc_TC036979 | -0.24 | 0.76  |      | -0.1  | 0.92      |      | 2.34  | 0.03 | Up   | 1.4   | 0.06 |      | expansin B2                                                             |      |
| Pc_TC036980 | 0.02  | 0.98  |      | 0.98  | 0.1       |      | 2.05  | 0.03 | Up   | 1.31  | 0.04 | Up   | expansin B2                                                             |      |
| Pc_TC036984 | -1.8  | 0.14  |      | -0.82 | 0.51      |      | 2.61  | 0.03 | Up   | 1.58  | 0.08 |      | GATA transcription factor 4                                             |      |
| Pc_TC036987 | -1.07 | 0.05  | Down | -3.46 | 5.99E-006 | Down | 1.13  | 0.24 |      | 1.05  | 0.09 |      | senescence-related gene 1                                               |      |
| Pc_TC036989 | -1.61 | 0.03  | Down | -1.38 | 0.1       |      | 0.79  | 0.47 |      | 0.71  | 0.34 |      | senescence-related gene 1                                               |      |
| Pc_TC036990 | -0.92 | 0.16  |      | -2.23 | 0.01      | Down | 0.5   | 0.64 |      | 0.8   | 0.25 |      | senescence-related gene 1                                               |      |
| Pc_TC037003 | -1.42 | 0.01  | Down | -0.96 | 0.13      |      | -0.59 | 0.55 |      | -2.2  | 0    | Down | Major facilitator superfamily protein                                   |      |
| Pc_TC037041 | 0.43  | 0.35  |      | 1.05  | 0.06      |      | -2.38 | 0.02 | Down | -0.53 | 0.41 |      | Haloacid dehalogenase-like hydrolase (HAD) superfamily protein          |      |
| Pc_TC037042 | 0.53  | 0.08  |      | 0.72  | 0.06      |      | -2.72 | 0    | Down | -0.57 | 0.25 |      | Haloacid dehalogenase-like hydrolase (HAD) superfamily protein          |      |
| Pc_TC037046 | 0.29  | 0.81  |      | -0.19 | 0.92      |      | 1.26  | 0.33 |      | 1.92  | 0.03 | Up   | Uncharacterized protein                                                 |      |
| Pc_TC037061 | 0.79  | 0.11  |      | 1.08  | 0.07      |      | -2.16 | 0.05 | Down | -0.06 | 0.93 |      | Mitochondrial substrate carrier family protein                          |      |
| Pc_TC037062 | 1.4   | 0.02  | Up   | 1.69  | 0.01      | Up   | -2.4  | 0.05 |      | -3.02 | 0    | Down | Mitochondrial substrate carrier family protein                          |      |
| Pc_TC037063 | -0.57 | 0.48  |      | 2.12  | 0         | Up   | -1.44 | 0.26 |      | -0.21 | 0.83 |      | Mitochondrial substrate carrier family protein                          |      |
| Pc_TC037076 | -2.44 | 0     | Down | -0.45 | 0.54      |      | -0.11 | 0.93 |      | -2.46 | 0    | Down | CONTAINS InterPro DOMAIN/s: NERD (InterPro:IPRO11528)                   |      |
| Pc_TC037079 | -0.76 | 0.04  |      | -0.93 | 0.05      |      | 1.7   | 0.05 | Up   | 0.88  | 0.09 |      | shikimate kinase like 2                                                 |      |
| Pc_TC037081 | -0.43 | 0.43  |      | -1.73 | 0.01      | Down | -1.87 | 0.08 |      | -2.01 | 0.01 | Down | similar to RCD one 1                                                    |      |
| Pc_TC037082 | -0.92 | 0.05  |      | -1.37 | 0.02      | Down | 0.78  | 0.39 |      | 0.76  | 0.18 |      | similar to RCD one 1                                                    |      |
| Pc_TC037084 | -3.03 | 0     | Down | -2.2  | 0.04      | Down | -2.02 | 0.13 |      | -2.63 | 0.01 | Down | similar to RCD one 1                                                    |      |
| Pc_TC037089 | 0.41  | 0.64  |      | 1.64  | 0.05      | Up   | 0.53  | 0.68 |      | -0.42 | 0.69 |      | cellulose-synthase like D2                                              |      |
| Pc_TC037092 | -0.23 | 0.71  |      | -1.66 | 0.03      | Down | 1.82  | 0.07 |      | 0.8   | 0.24 |      | membrane protein, putative                                              |      |
| Pc_TC037097 | 0.92  | 0.16  |      | 1.61  | 0.02      | Up   | 1.04  | 0.34 |      | 0.95  | 0.21 |      | NADH:ubiquinone oxidoreductase, 17.2kDa subunit                         |      |
| Pc_TC037105 | -1.37 | 0.06  |      | -0.87 | 0.29      |      | -0.83 | 0.47 |      | -1.73 | 0.04 | Down | Essential protein Yae1, N-terminal                                      |      |
| Pc_TC037111 | 1.32  | 0.21  |      | 2.46  | 0.01      | Up   | 2.84  | 0.03 | Up   | 1.49  | 0.17 |      | Polymerase/histidinol phosphatase-like                                  |      |
| Pc_TC037114 | -0.92 | 0.1   |      | -0.73 | 0.27      |      | 2.12  | 0.03 | Up   | 0.7   | 0.27 |      | phototropin 2                                                           |      |
| Pc_TC037115 | -0.92 | 0.09  |      | -1.37 | 0.04      | Down | 1.13  | 0.24 |      | -0.61 | 0.36 |      | phototropin 1                                                           |      |
| Pc_TC037121 | 0.56  | 0.69  |      | -0.68 | 0.73      |      | 2.43  | 0.07 |      | 2.33  | 0.02 | Up   | fatty acid desaturase 3                                                 |      |
| Pc_TC037124 | -1.03 | 0.04  | Down | -2.39 | 0         | Down | 2.62  | 0    | Up   | 1.12  | 0.05 |      | Hydroxyproline-rich glycoprotein family protein                         |      |
| Pc_TC037133 | -0.45 | 0.36  |      | -0.89 | 0.14      |      | 1.88  | 0.04 | Up   | 0.82  | 0.17 |      | TRICHOME BIREFRINGENCE-LIKE 34                                          |      |
| Pc_TC037138 | 1.08  | 0.65  |      | 3     | 0.04      | Up   | 2.92  | 0.09 |      | 3.08  | 0.02 | Up   | inflorescence meristem receptor-like kinase 2                           |      |
| Pc_TC037142 | 0.46  | 0.13  |      | 0.65  | 0.09      |      | -2.53 | 0    | Down | -0.81 | 0.1  |      | RNI-like superfamily protein                                            |      |
| Pc_TC037160 | 2.54  | 0.02  | Up   | 2.93  | 0.01      | Up   | 1.17  | 0.52 |      | -0.96 | 0.68 |      | with no lysine (K) kinase 5                                             |      |
| Pc_TC037166 | 0.54  | 0.16  |      | 1.4   | 0         | Up   | -0.85 | 0.35 |      | -0.4  | 0.48 |      | lipid transfer protein 3                                                |      |
| Pc_TC037178 | 1.89  | 0.12  |      | 2.68  | 0.02      | Up   | 1.5   | 0.37 |      | 0.85  | 0.61 |      | Phototropic-responsive NPH3 family protein                              |      |
| Pc_TC037180 | -0.56 | 0.51  |      | -0.73 | 0.45      |      | 0     | 0    |      | -3.28 | 0    | Down | alpha/beta-Hydrolases superfamily protein                               |      |
| Pc_TC037206 | -1.36 | 0.04  | Down | -1.01 | 0.18      |      | 2.43  | 0.02 | Up   | 1.15  | 0.09 |      | MATE efflux family protein                                              |      |
| Pc_TC037213 | -0.77 | 0.2   |      | -0.74 | 0.29      |      | 2.07  | 0.04 | Up   | 1.32  | 0.04 | Up   | Peroxisomal membrane 22 kDa (Mpv17/PMP22) family protein                |      |
| Pc_TC037228 | 0.29  | 0.81  |      | 1.42  | 0.14      |      | 0     | 0.01 |      | -3.62 | 0.02 | Down | S-domain-2 5                                                            |      |
| Pc_TC037237 | -0.56 | 0.18  |      | -1.66 | 0         | Down | 0.81  | 0.37 |      | 0.66  | 0.23 |      | zinc induced facilitator-like 1                                         |      |
| Pc_TC037265 | 0.05  | 0.9   |      | -0.32 | 0.49      |      | 0.64  | 0.45 |      | 1.13  | 0.03 | Up   | 2-isopropylmalate synthase 1                                            |      |
| Pc_TC037267 | -0.54 | 0.19  |      | -1.25 | 0.02      | Down | -0.16 | 0.86 |      | -1.32 | 0.03 | Down | response regulator 9                                                    |      |
| Pc_TC037292 | -0.52 | 0.39  |      | -1.48 | 0.05      | Down | 0.56  | 0.59 |      | -0.4  | 0.57 |      | bZIP transcription factor family protein                                | bZIP |
| Pc_TC037297 | -0.51 | 0.29  |      | -1.15 | 0.06      |      | -0.83 | 0.4  |      | -1.38 | 0.03 | Down | chloroplast signal recognition particle 54 kDa subunit                  |      |
| Pc_TC037310 | 0.4   | 0.71  |      | -0.18 | 0.93      |      | 1.27  | 0.32 |      | 1.89  | 0.03 | Up   | HVA22-like protein J                                                    |      |

|             |       |       |      |  |       |           |      |  |       |           |      |       |       |      |                                                                 |      |
|-------------|-------|-------|------|--|-------|-----------|------|--|-------|-----------|------|-------|-------|------|-----------------------------------------------------------------|------|
| Pc_TC037324 | -0.14 | 0.83  |      |  | 0.06  | 0.95      |      |  | -3.4  | 0.01      | Down | -0.53 | 0.48  |      | RING/FYVE/PHD zinc finger superfamily protein                   |      |
| Pc_TC037336 | 0.24  | 0.48  |      |  | -0.23 | 0.6       |      |  | -1.98 | 0.03      | Down | -1.06 | 0.05  | Down | NB-ARC domain-containing disease resistance protein             |      |
| Pc_TC037352 | 0.97  | 0.49  |      |  | 0.06  | 1         |      |  | 4.25  | 0         | Up   | 2.4   | 0.03  | Up   | fatty acid amide hydrolase                                      |      |
| Pc_TC037354 | -1.37 | 0.01  | Down |  | -1.67 | 0.01      | Down |  | 0.8   | 0.39      |      | -0.07 | 0.91  |      | Plant protein of unknown function (DUF869)                      |      |
| Pc_TC037361 | -0.49 | 0.18  |      |  | -1.35 | 0.01      | Down |  | 1.2   | 0.16      |      | 0.44  | 0.41  |      | fructose-bisphosphate aldolase 2                                |      |
| Pc_TC037362 | -0.7  | 0.02  |      |  | -1.08 | 0.01      | Down |  | 1.38  | 0.1       |      | 0.39  | 0.42  |      | fructose-bisphosphate aldolase 2                                |      |
| Pc_TC037371 | -1.96 | 0.04  | Down |  | -1.84 | 0.08      |      |  | -1.77 | 0.19      |      | -0.64 | 0.5   |      | Leucine-rich repeat protein kinase family protein               |      |
| Pc_TC037372 | -0.11 | 0.96  |      |  | -3.53 | 0.02      | Down |  | 0.65  | 0.63      |      | 1.43  | 0.11  |      | Leucine-rich repeat protein kinase family protein               |      |
| Pc_TC037383 | -0.41 | 0.74  |      |  | 1.88  | 0.04      | Up   |  | 0.5   | 0.72      |      | -1.45 | 0.24  |      | RNA helicase,ATP-dependent,SK12/DOB1 protein                    |      |
| Pc_TC037385 | 0.48  | 0.38  |      |  | 0.85  | 0.18      |      |  | -2.27 | 0.04      | Down | -1.12 | 0.13  |      | ATP-binding cassette family G25                                 |      |
| Pc_TC037388 | 1.95  | 0.24  |      |  | 3.17  | 0.02      | Up   |  | 0.24  | 1         |      | 0     | 0.35  |      | Protein of unknown function (DUF668)                            |      |
| Pc_TC037404 | 0.22  | 0.67  |      |  | 1.36  | 0.02      | Up   |  | -0.85 | 0.41      |      | -0.22 | 0.74  |      | aldehyde dehydrogenase 3H1                                      |      |
| Pc_TC037434 | 2.56  | 0.01  | Up   |  | 1.42  | 0.3       |      |  | 1.6   | 0.31      |      | 1.4   | 0.28  |      | F-box/RNI-like superfamily protein                              |      |
| Pc_TC037450 | 0.78  | 0.4   |      |  | 1.9   | 0.04      | Up   |  | -0.1  | 0.98      |      | 0.38  | 0.75  |      | unknown protein                                                 |      |
| Pc_TC037465 | 2.64  | ##### | Up   |  | 4.23  | 3.19E-014 | Up   |  | 1.25  | 0.23      |      | 1.15  | 0.1   |      | alcohol dehydrogenase 1                                         |      |
| Pc_TC037467 | 1.47  | 0     | Up   |  | 1.48  | 0.01      | Up   |  | -0.37 | 0.72      |      | -0.73 | 0.28  |      | alcohol dehydrogenase 1                                         |      |
| Pc_TC037487 | -0.37 | 0.81  |      |  | 0.47  | 0.72      |      |  | 0     | 0.02      |      | -4.28 | 0.02  | Down | serpin 3                                                        |      |
| Pc_TC037518 | -0.41 | 0.28  |      |  | -0.89 | 0.07      |      |  | 2.16  | 0.01      | Up   | 1.06  | 0.04  | Up   | light harvesting complex of photosystem II 5                    |      |
| Pc_TC037519 | -0.55 | 0.25  |      |  | -1.57 | 0.01      | Down |  | 2.49  | 0.01      | Up   | 1.45  | 0.01  | Up   | light harvesting complex of photosystem II 5                    |      |
| Pc_TC037524 | -0.28 | 0.94  |      |  | 2.56  | 0.01      | Up   |  | -3.67 | 0.15      |      | -0.74 | 0.69  |      | protein,putative,unclassified                                   |      |
| Pc_TC037532 | 1.32  | 0.06  |      |  | 1.91  | 0.01      | Up   |  | -0.03 | 1         |      | 0.21  | 0.83  |      | Galactose oxidase/kelch repeat superfamily protein              |      |
| Pc_TC037587 | -0.5  | 0.42  |      |  | -0.16 | 0.83      |      |  | -1.58 | 0.16      |      | -2.66 | 0     | Down | cycloartenol synthase 1                                         |      |
| Pc_TC037588 | -0.72 | 0.16  |      |  | -0.92 | 0.14      |      |  | -0.95 | 0.34      |      | -1.49 | 0.03  | Down | cycloartenol synthase 1                                         |      |
| Pc_TC037593 | -0.21 | 0.7   |      |  | 0.29  | 0.65      |      |  | 2.5   | 0.01      | Up   | 1.79  | 0     | Up   | Glycosyl hydrolase family protein                               |      |
| Pc_TC037602 | -3.86 | 0     | Down |  | -2.14 | 0.04      | Down |  | -4.44 | 0.01      | Down | -0.94 | 0.31  |      | Expressed protein                                               | CCHC |
| Pc_TC037639 | 0.24  | 0.66  |      |  | 0.95  | 0.12      |      |  | -2.41 | 0.03      | Down | -0.73 | 0.29  |      | Xanthine/uracil permease family protein                         |      |
| Pc_TC037649 | -1.56 | 0.04  | Down |  | -1.7  | 0.05      |      |  | 1.6   | 0.13      |      | 0.25  | 0.76  |      | serine carboxypeptidase-like 19                                 |      |
| Pc_TC037673 | 0.36  | 0.39  |      |  | 0.99  | 0.05      |      |  | -9.68 | 1.26E-009 | Down | -4.24 | ##### | Down | Uncharacterized protein                                         |      |
| Pc_TC037674 | 0.49  | 0.56  |      |  | 2.42  | 0         | Up   |  | -2.4  | 0.11      |      | -2.11 | 0.06  |      | Water stress-inducible protein Rab21                            |      |
| Pc_TC037675 | 0.33  | 0.3   |      |  | 1.25  | 0         | Up   |  | -8.64 | 6.89E-013 | Down | -3.71 | ##### | Down | Putative uncharacterized protein                                |      |
| Pc_TC037678 | 1.4   | 0.4   |      |  | 2.7   | 0.05      | Up   |  | 4.06  | 0.01      | Up   | 3.3   | 0.01  | Up   | rapid alkalization factor 23                                    |      |
| Pc_TC037680 | -1.14 | 0.11  |      |  | -0.75 | 0.35      |      |  | 2.7   | 0.01      | Up   | 1.77  | 0.01  | Up   | unknown protein                                                 |      |
| Pc_TC037682 | -1.14 | 0.15  |      |  | -0.25 | 0.79      |      |  | 2.22  | 0.04      | Up   | 1.34  | 0.07  |      | serine carboxypeptidase-like 17                                 |      |
| Pc_TC037684 | -0.3  | 0.58  |      |  | 0.54  | 0.39      |      |  | 2.69  | 0.01      | Up   | 1.44  | 0.02  | Up   | serine carboxypeptidase-like 18                                 |      |
| Pc_TC037685 | 0.02  | 0.98  |      |  | -0.37 | 0.58      |      |  | 2.04  | 0.04      | Up   | 1.66  | 0.01  | Up   | serine carboxypeptidase-like 18                                 |      |
| Pc_TC037686 | -0.44 | 0.24  |      |  | -0.09 | 0.85      |      |  | 2.6   | 0         | Up   | 1.69  | 0     | Up   | serine carboxypeptidase-like 1                                  |      |
| Pc_TC037688 | -0.21 | 0.67  |      |  | -0.17 | 0.77      |      |  | 2.85  | 0         | Up   | 1.9   | 0     | Up   | serine carboxypeptidase-like 3                                  |      |
| Pc_TC037689 | -1.94 | 0.02  | Down |  | -1.3  | 0.14      |      |  | 3.37  | 0         | Up   | 2.36  | 0     | Up   | serine carboxypeptidase-like 18                                 |      |
| Pc_TC037714 | 2.4   | 0.04  | Up   |  | 2.44  | 0.06      |      |  | 1.88  | 0.26      |      | 2.92  | 0.01  | Up   | O-fucosyltransferase family protein                             |      |
| Pc_TC037720 | -0.56 | 0.17  |      |  | -1.05 | 0.05      | Down |  | 1.66  | 0.06      |      | 0.82  | 0.13  |      | Pentatricopeptide repeat (PPR) superfamily protein              |      |
| Pc_TC037722 | 1.66  | 0.48  |      |  | 3.64  | 0.02      | Up   |  | 1.5   | 0.6       |      | 3.02  | 0.07  |      | Pentatricopeptide repeat (PPR) superfamily protein              |      |
| Pc_TC037724 | -0.83 | 0.06  |      |  | -0.95 | 0.09      |      |  | 1.93  | 0.03      | Up   | 0.5   | 0.38  |      | minichromosome maintenance (MCM2/3/5) family protein            |      |
| Pc_TC037735 | 0.82  | 0.05  |      |  | 1.06  | 0.04      | Up   |  | -1.55 | 0.12      |      | 0.19  | 0.75  |      | WRKY DNA-binding protein 75                                     | WRKY |
| Pc_TC037738 | -0.53 | 0.57  |      |  | 0.57  | 0.53      |      |  | 2.56  | 0.02      | Up   | 1.51  | 0.06  |      | Protein of unknown function (DUF 3339)                          |      |
| Pc_TC037742 | -0.36 | 0.6   |      |  | -0.49 | 0.54      |      |  | -3.5  | 0.01      | Down | -3.03 | 0     | Down | protein,putative,unclassified,expressed                         |      |
| Pc_TC037744 | -0.61 | 0.45  |      |  | 0.39  | 0.65      |      |  | 3.31  | 0         | Up   | 1.83  | 0.01  | Up   | sulfotransferase 4A                                             |      |
| Pc_TC037758 | 0.73  | 0.12  |      |  | 0.34  | 0.56      |      |  | 0.07  | 0.94      |      | 1.63  | 0.01  | Up   | unknown protein                                                 |      |
| Pc_TC037759 | -0.92 | 0.65  |      |  | -0.13 | 1         |      |  | 6.06  | 1.72E-006 | Up   | 3.97  | ##### | Up   | serine carboxypeptidase-like 45                                 |      |
| Pc_TC037770 | -0.2  | 0.78  |      |  | 0.57  | 0.43      |      |  | 2.18  | 0.04      | Up   | 1.17  | 0.1   |      | Chalcone and stilbene synthase family protein                   |      |
| Pc_TC037782 | 0.76  | 0.03  |      |  | 1.42  | 0         | Up   |  | -0.68 | 0.44      |      | 1.01  | 0.05  |      | respiratory burst oxidase homologue D                           |      |
| Pc_TC037783 | -0.05 | 0.95  |      |  | 0.64  | 0.31      |      |  | -2.48 | 0.03      | Down | -0.1  | 0.89  |      | respiratory burst oxidase homologue D                           |      |
| Pc_TC037787 | -0.49 | 0.57  |      |  | 1.48  | 0.06      |      |  | 2.33  | 0.04      | Up   | 1.32  | 0.1   |      | xyloglucan endotransglucosylase/hydrolase 5                     |      |
| Pc_TC037810 | 1.35  | 0.1   |      |  | -0.94 | 0.45      |      |  | 0.25  | 0.88      |      | 1.74  | 0.05  | Up   | cysteine-rich RLK (RECEPTOR-like protein kinase) 29             |      |
| Pc_TC037839 | -0.17 | 0.75  |      |  | -0.23 | 0.71      |      |  | 2.24  | 0.02      | Up   | 1.57  | 0.01  | Up   | long-chain acyl-CoA synthetase 2                                |      |
| Pc_TC037849 | -2.24 | 0     | Down |  | -1.56 | 0.05      | Down |  | -2.5  | 0.03      | Down | -1.37 | 0.08  |      | RWD domain-containing protein                                   |      |
| Pc_TC037855 | -0.02 | 1     |      |  | 0.8   | 0.38      |      |  | 0.64  | 0.61      |      | 2.21  | 0.01  | Up   | Leucine-rich repeat protein kinase family protein               |      |
| Pc_TC037887 | -0.18 | 0.86  |      |  | 0.06  | 0.98      |      |  | 2.28  | 0.04      | Up   | 1.06  | 0.21  |      | ARM repeat superfamily protein                                  |      |
| Pc_TC037888 | 0.69  | 0.09  |      |  | 1.21  | 0.02      | Up   |  | -0.89 | 0.35      |      | -0.39 | 0.51  |      | RING/U-box superfamily protein                                  |      |
| Pc_TC037889 | 0.06  | 0.86  |      |  | 0.26  | 0.53      |      |  | -2.2  | 0.01      | Down | -1.5  | 0     | Down | Root hair defective 3 GTP-binding protein (RHD3)                |      |
| Pc_TC037958 | -0.24 | 1     |      |  | -0.68 | 0.87      |      |  | 2.8   | 0.07      |      | 2.63  | 0.03  | Up   | NB-ARC domain-containing disease resistance protein             |      |
| Pc_TC037959 | -0.34 | 0.37  |      |  | -1.08 | 0.03      | Down |  | 1.35  | 0.12      |      | 1.12  | 0.03  | Up   | leucine-rich repeat transmembrane protein kinase family protein |      |
| Pc_TC037960 | -0.5  | 0.26  |      |  | -1.19 | 0.04      | Down |  | 1.23  | 0.17      |      | 0.91  | 0.11  |      | leucine-rich repeat transmembrane protein kinase family protein |      |

|             |       |       |      |       |           |      |       |      |      |       |       |      |                                                                          |                  |
|-------------|-------|-------|------|-------|-----------|------|-------|------|------|-------|-------|------|--------------------------------------------------------------------------|------------------|
| Pc_TC037968 | 3.66  | 0.06  |      | 0     | 1         |      | 2.67  | 0.36 |      | 4.21  | 0.02  | Up   | Putative uncharacterized protein                                         |                  |
| Pc_TC037984 | 2.89  | 0.03  | Up   | 3.12  | 0.03      | Up   | 0     | 0.36 |      | 0     | 0.35  |      | Leucine-rich repeat protein kinase family protein                        |                  |
| Pc_TC037989 | -1.96 | 0.05  | Down | -0.9  | 0.38      |      | 1.38  | 0.23 |      | -0.12 | 0.92  |      | ELF4-like 3                                                              |                  |
| Pc_TC037993 | 0.23  | 0.69  |      | 0.45  | 0.5       |      | 0.71  | 0.49 |      | 1.42  | 0.03  | Up   | Leucine-rich repeat protein kinase family protein                        |                  |
| Pc_TC038023 | -1.09 | 0.55  |      | -0.3  | 0.93      |      | 2.67  | 0.05 | Up   | 1.7   | 0.13  |      | RNI-like superfamily protein                                             |                  |
| Pc_TC038024 | 0.76  | 0.01  |      | 0.16  | 0.67      |      | -2.44 | 0    | Down | 0.36  | 0.46  |      | Tyrosine transaminase family protein                                     |                  |
| Pc_TC038025 | 0.83  | 0.01  |      | 0.11  | 0.8       |      | -2.44 | 0.01 | Down | 0.52  | 0.3   |      | Tyrosine transaminase family protein                                     |                  |
| Pc_TC038045 | -0.28 | 0.69  |      | -1.86 | 0.03      | Down | 0.26  | 0.82 |      | 0.64  | 0.38  |      | Pentatricopeptide repeat (PPR) superfamily protein                       |                  |
| Pc_TC038059 | 0.44  | 0.34  |      | 1.25  | 0.02      | Up   | -0.11 | 0.91 |      | 0.41  | 0.51  |      | Dormancy/auxin associated family protein                                 |                  |
| Pc_TC038063 | 0.26  | 0.82  |      | 1.21  | 0.2       |      | 2.21  | 0.06 |      | 2.13  | 0.01  | Up   | PLAC8 family protein                                                     |                  |
| Pc_TC038066 | 1.78  | 0.01  | Up   | 1.58  | 0.05      | Up   | -1.18 | 0.37 |      | 1.56  | 0.05  |      | beta-xylosidase 2                                                        |                  |
| Pc_TC038067 | 2.16  | 0     | Up   | 2.17  | 0         | Up   | 0.21  | 0.86 |      | 1.75  | 0.01  | Up   | beta-xylosidase 1                                                        |                  |
| Pc_TC038082 | 1.18  | 0.03  | Up   | 1.12  | 0.09      |      | 0.5   | 0.64 |      | 1.05  | 0.13  |      | Glycosyl hydrolase superfamily protein                                   |                  |
| Pc_TC038083 | 0.29  | 0.44  |      | -0.06 | 0.9       |      | 0.94  | 0.28 |      | 1.07  | 0.04  | Up   | Glycosyl hydrolase superfamily protein                                   |                  |
| Pc_TC038084 | 1.83  | 0.01  | Up   | 2.09  | 0.01      | Up   | 0.59  | 0.66 |      | 2.19  | 0.01  | Up   | Glycosyl hydrolase superfamily protein                                   |                  |
| Pc_TC038108 | -0.84 | 0.17  |      | -2.35 | 0         | Down | -1.1  | 0.31 |      | -0.43 | 0.55  |      | ARM repeat superfamily protein                                           |                  |
| Pc_TC038111 | -0.11 | 0.94  |      | -3.94 | 0.01      | Down | -3.94 | 0.09 |      | 0.41  | 0.67  |      | laccase 14                                                               |                  |
| Pc_TC038113 | 0.13  | 0.83  |      | -2.68 | 0         | Down | 1.72  | 0.09 |      | 0.52  | 0.45  |      | myb domain protein 59                                                    | MYB, MYB-related |
| Pc_TC038114 | -1.31 | 0     | Down | -2.3  | 2.48E-005 | Down | 1.14  | 0.19 |      | -0.08 | 0.89  |      | myb domain protein 59                                                    | MYB              |
| Pc_TC038117 | 1.34  | 0.02  | Up   | 1.83  | 0         | Up   | -2.09 | 0.07 |      | -0.31 | 0.69  |      | chitinase A                                                              |                  |
| Pc_TC038120 | 1.08  | 0.01  | Up   | 1.56  | 0         | Up   | -2.11 | 0.04 | Down | -0.26 | 0.66  |      | chitinase A                                                              |                  |
| Pc_TC038127 | 0.47  | 0.65  |      | 2.54  | 0         | Up   | -0.5  | 0.76 |      | 0.99  | 0.32  |      | O-Glycosyl hydrolases family 17 protein                                  |                  |
| Pc_TC038129 | 0.64  | 0.15  |      | 1.1   | 0.04      | Up   | -1.76 | 0.08 |      | -0.35 | 0.57  |      | RHOMBOID-like 1                                                          |                  |
| Pc_TC038134 | -0.91 | 0.07  |      | -1.94 | 0         | Down | 1.83  | 0.05 | Up   | 1     | 0.09  |      | rubisco activase                                                         |                  |
| Pc_TC038141 | -2.85 | 0     | Down | -0.48 | 0.58      |      | 1.13  | 0.3  |      | -1.72 | 0.06  |      | RECQ helicase L2                                                         |                  |
| Pc_TC038143 | 0.82  | 0.36  |      | 1.89  | 0.03      | Up   | 0.94  | 0.47 |      | 1.01  | 0.29  |      | phenylalanine ammonia-lyase 4                                            |                  |
| Pc_TC038147 | -1.13 | 0.26  |      | 0.96  | 0.29      |      | 2.49  | 0.03 | Up   | 0.3   | 0.77  |      | phototropin 2                                                            |                  |
| Pc_TC038155 | -1.6  | ##### | Down | -2.73 | 2.09E-009 | Down | 2.34  | 0.01 | Up   | 0.9   | 0.07  |      | Hydroxyproline-rich glycoprotein family protein                          |                  |
| Pc_TC038159 | 0.6   | 0.35  |      | 1.71  | 0.01      | Up   | 1.24  | 0.25 |      | 1.45  | 0.04  | Up   | Leucine-rich repeat protein kinase family protein                        |                  |
| Pc_TC038164 | 1.52  | 0.03  | Up   | 1.81  | 0.02      | Up   | 0.49  | 0.69 |      | 0.14  | 0.9   |      | ferritin 4                                                               |                  |
| Pc_TC038166 | -0.34 | 0.42  |      | 0.67  | 0.17      |      | -2.01 | 0.04 | Down | -0.73 | 0.21  |      | ferritin 4                                                               |                  |
| Pc_TC038169 | -0.67 | 0.15  |      | -1.07 | 0.07      |      | 1.85  | 0.04 | Up   | 0.92  | 0.11  |      | TRICHOME BIREFRINGENCE-LIKE 34                                           |                  |
| Pc_TC038179 | 0.43  | 0.18  |      | 0.64  | 0.12      |      | -2.64 | 0    | Down | -0.75 | 0.14  |      | RNI-like superfamily protein                                             |                  |
| Pc_TC038187 | 1.66  | 0.48  |      | 3.81  | 0.01      | Up   | 2.41  | 0.27 |      | 3.08  | 0.06  |      | RNA-directed DNA methylation 4                                           |                  |
| Pc_TC038196 | 0.55  | 0.44  |      | -1.82 | 0.06      |      | -2.28 | 0.08 |      | -2.16 | 0.03  | Down | dual specificity protein phosphatase (DsPTP1) family protein             |                  |
| Pc_TC038200 | -0.04 | 0.9   |      | 0.11  | 0.78      |      | -2.04 | 0.02 | Down | -0.74 | 0.14  |      | CBL-interacting protein kinase 15                                        |                  |
| Pc_TC038204 | 1.11  | 0.02  | Up   | 2.36  | 1.49E-005 | Up   | -0.95 | 0.36 |      | -0.12 | 0.86  |      | lipid transfer protein 1                                                 |                  |
| Pc_TC038207 | -0.02 | 1     |      | -0.18 | 0.85      |      | 2.93  | 0.01 | Up   | 1.48  | 0.05  | Up   | Chalcone-flavanone isomerase family protein                              |                  |
| Pc_TC038223 | -0.5  | 0.46  |      | -0.87 | 0.27      |      | 1.97  | 0.06 |      | 1.42  | 0.04  | Up   | Protein of unknown function (DUF1191)                                    |                  |
| Pc_TC038242 | 0.37  | 0.31  |      | -0.01 | 0.99      |      | -2.16 | 0.02 | Down | 0     | 1     |      | NAC domain containing protein 2                                          | NAC              |
| Pc_TC038245 | -1.06 | 0.51  |      | 0.41  | 0.81      |      | 3.09  | 0.02 | Up   | 1.89  | 0.07  |      | SMAD/FHA domain-containing protein                                       | FHA              |
| Pc_TC038254 | 1.28  | 0.07  |      | 0.59  | 0.5       |      | 1.7   | 0.13 |      | 1.76  | 0.02  | Up   | MATE efflux family protein                                               |                  |
| Pc_TC038256 | -0.91 | 0.09  |      | -1.34 | 0.04      | Down | 2.24  | 0.02 | Up   | 0.89  | 0.15  |      | MATE efflux family protein                                               |                  |
| Pc_TC038263 | -2.27 | ##### | Down | -1.23 | 0.03      | Down | -1.48 | 0.13 |      | -2.88 | ##### | Down | alpha-L-arabinofuranosidase 1                                            |                  |
| Pc_TC038273 | 0.63  | 0.54  |      | 0.14  | 0.96      |      | -2.26 | 0.19 |      | -3.46 | 0.03  | Down | Leucine-rich repeat transmembrane protein kinase                         |                  |
| Pc_TC038274 | 1.16  | 0.2   |      | 2.41  | 0.01      | Up   | 0     | 0.01 |      | -1.46 | 0.27  |      | S-domain-2 5                                                             |                  |
| Pc_TC038289 | -1.37 | 0.02  | Down | 0.91  | 0.13      |      | 1.17  | 0.24 |      | -1.37 | 0.05  |      | zinc induced facilitator-like 2                                          |                  |
| Pc_TC038290 | -1.19 | 0.05  | Down | 0.68  | 0.28      |      | -0.79 | 0.46 |      | -0.26 | 0.72  |      | zinc induced facilitator-like 1                                          |                  |
| Pc_TC038291 | -1.25 | 0.03  | Down | -1.01 | 0.14      |      | -1.21 | 0.25 |      | -1.24 | 0.08  |      | zinc induced facilitator-like 2                                          |                  |
| Pc_TC038292 | 1.32  | 0     | Up   | 1.13  | 0.01      | Up   | -2.2  | 0.02 | Down | 0.42  | 0.43  |      | zinc induced facilitator-like 2                                          |                  |
| Pc_TC038311 | 0.3   | 0.3   |      | 0.55  | 0.15      |      | -2.59 | 0    | Down | -1.7  | 0     | Down | Calcium-binding EF-hand family protein                                   |                  |
| Pc_TC038315 | -1.25 | 0.03  | Down | -1.38 | 0.04      | Down | 1.22  | 0.21 |      | 0.47  | 0.47  |      | P-loop containing nucleoside triphosphate hydrolases superfamily protein |                  |
| Pc_TC038316 | -1.53 | 0.03  | Down | -1.55 | 0.05      |      | 1.12  | 0.28 |      | 0.67  | 0.34  |      | P-loop containing nucleoside triphosphate hydrolases superfamily protein |                  |
| Pc_TC038335 | 0.72  | 0.27  |      | 1.53  | 0.03      | Up   | 0.23  | 0.85 |      | 0.46  | 0.56  |      | long-chain acyl-CoA synthetase 6                                         |                  |
| Pc_TC038347 | 0.08  | 1     |      | 0     | 1         |      | 4.55  | 0.03 | Up   | 3.8   | 0.05  |      | Leucine-rich repeat protein kinase family protein                        |                  |
| Pc_TC038359 | 0.15  | 0.93  |      | 1.19  | 0.22      |      | -4.89 | 0.02 | Down | -4.77 | 0.01  | Down | Purple acid phosphatases superfamily protein                             |                  |
| Pc_TC038361 | -0.22 | 0.86  |      | -4.7  | 0.01      | Down | -1.08 | 0.44 |      | -1.13 | 0.3   |      | alpha/beta-Hydrolases superfamily protein                                |                  |
| Pc_TC038390 | -0.29 | 0.73  |      | -2.23 | 0.03      | Down | 1.2   | 0.29 |      | 0.96  | 0.23  |      | BEL1-like homeodomain 1                                                  |                  |
| Pc_TC038399 | 0.67  | 0.12  |      | -2.76 | 3.32E-005 | Down | 0.88  | 0.34 |      | -0.37 | 0.54  |      | actin-11                                                                 |                  |
| Pc_TC038412 | 2.08  | 0.04  | Up   | 2.77  | 0.01      | Up   | 0     | 0.07 |      | 0.04  | 1     |      | Expressed protein                                                        |                  |
| Pc_TC038438 | 1.55  | 0.1   |      | 2.9   | 0         | Up   | -2.2  | 0.24 |      | 0.45  | 0.74  |      | Disease resistance-responsive (dirigent-like protein) family protein     |                  |
| Pc_TC038447 | 1.65  | 0.03  | Up   | 0.59  | 0.55      |      | 0.88  | 0.48 |      | 0.73  | 0.44  |      | Eukaryotic aspartyl protease family protein                              |                  |

|             |       |      |      |       |           |      |       |           |      |       |       |      |                                                                          |      |
|-------------|-------|------|------|-------|-----------|------|-------|-----------|------|-------|-------|------|--------------------------------------------------------------------------|------|
| Pc_TC038448 | 0.39  | 0.41 |      | 0.12  | 0.84      |      | 1.13  | 0.23      |      | 1.5   | 0.01  | Up   | aldehyde dehydrogenase 3H1                                               |      |
| Pc_TC038466 | -0.31 | 0.57 |      | -0.35 | 0.59      |      | -2.55 | 0.02      | Down | -0.6  | 0.38  |      | Thiamin diphosphate-binding fold (THDP-binding) superfamily protein      |      |
| Pc_TC038467 | 1.85  | 0    | Up   | 1.64  | 0.01      | Up   | -1.5  | 0.19      |      | 0.65  | 0.36  |      | Thiamin diphosphate-binding fold (THDP-binding) superfamily protein      |      |
| Pc_TC038468 | 0.49  | 0.2  |      | -2.29 | 5.77E-005 | Down | -2.38 | 0.01      | Down | -0.99 | 0.09  |      | Thiamin diphosphate-binding fold (THDP-binding) superfamily protein      |      |
| Pc_TC038469 | -0.08 | 0.8  |      | 0.47  | 0.25      |      | -2.55 | 0         | Down | -1.39 | 0.01  | Down | Thiamin diphosphate-binding fold (THDP-binding) superfamily protein      |      |
| Pc_TC038473 | 0.22  | 0.75 |      | 1.14  | 0.11      |      | 0     | 3.46E-005 |      | -4.28 | ##### | Down | unknown protein                                                          |      |
| Pc_TC038511 | 0.1   | 0.78 |      | -0.4  | 0.39      |      | 1.05  | 0.22      |      | 1.14  | 0.03  | Up   | Leucine-rich repeat protein kinase family protein                        |      |
| Pc_TC038527 | 0.04  | 0.9  |      | 0.03  | 0.94      |      | -1.04 | 0.22      |      | -1.24 | 0.02  | Down | diacylglycerol kinase 2                                                  |      |
| Pc_TC038542 | 1.27  | 0.09 |      | 1.95  | 0.02      | Up   | -1.2  | 0.38      |      | -0.2  | 0.87  |      | Protein of unknown function (DUF1685)                                    |      |
| Pc_TC038551 | -0.56 | 0.31 |      | -1.98 | 0.01      | Down | -1.75 | 0.1       |      | -2.16 | 0     | Down | phosphatidylinositol-4-phosphate 5-kinase family protein                 |      |
| Pc_TC038556 | -1.83 | 0    | Down | -2.12 | 0         | Down | -1.29 | 0.22      |      | -0.26 | 0.7   |      | exocyst complex component sec10                                          |      |
| Pc_TC038567 | 0.93  | 0.03 |      | 1.55  | 0         | Up   | -1.77 | 0.08      |      | 1.26  | 0.03  | Up   | lysine histidine transporter 2                                           |      |
| Pc_TC038581 | -0.36 | 0.78 |      | 0.33  | 0.8       |      | 2.5   | 0.04      | Up   | 0.99  | 0.32  |      | DHHC-type zinc finger family protein                                     |      |
| Pc_TC038602 | -1.41 | 0.03 | Down | -0.45 | 0.54      |      | -0.29 | 0.79      |      | 0.18  | 0.81  |      | ribulose bisphosphate carboxylase small chain 1A                         |      |
| Pc_TC038604 | -0.31 | 0.46 |      | -1.17 | 0.03      | Down | 0.96  | 0.28      |      | 0.61  | 0.27  |      | unknown protein                                                          |      |
| Pc_TC038605 | 0.44  | 0.52 |      | 1.01  | 0.17      |      | 2.56  | 0.02      | Up   | 1.97  | 0.01  | Up   | unknown protein                                                          |      |
| Pc_TC038615 | -4.06 | 0    | Down | -1.21 | 0.2       |      | 0.68  | 0.55      |      | -1.52 | 0.1   |      | protein,putative,unclassified                                            |      |
| Pc_TC038626 | 1.34  | 0.06 |      | 2.03  | 0.01      | Up   | -1.04 | 0.43      |      | 0.71  | 0.42  |      | quinolinate synthase                                                     |      |
| Pc_TC038632 | -0.7  | 0.07 |      | -1.13 | 0.02      | Down | 2.08  | 0.02      | Up   | 1.28  | 0.01  | Up   | ribulose bisphosphate carboxylase small chain 1A                         |      |
| Pc_TC038648 | -3.57 | 0.01 | Down | -0.78 | 0.51      |      | -0.39 | 0.8       |      | -0.26 | 0.83  |      | MAR-binding protein,putative,expressed                                   |      |
| Pc_TC038662 | -0.92 | 0.32 |      | -2.44 | 0.04      | Down | -0.88 | 0.51      |      | -0.21 | 0.85  |      | GCN5L1 family protein                                                    |      |
| Pc_TC038667 | -1.04 | 0    | Down | -1.61 | 0         | Down | 2.23  | 0.01      | Up   | 1     | 0.05  |      | chloroplast RNA binding                                                  |      |
| Pc_TC038688 | -0.7  | 0.39 |      | -5.53 | 0         | Down | 2.8   | 0.01      | Up   | 1.37  | 0.08  |      | O-methyltransferase family protein                                       |      |
| Pc_TC038729 | -1.14 | 0.32 |      | -0.09 | 0.99      |      | 2.79  | 0.02      | Up   | 1.74  | 0.05  |      | Putative retroelement                                                    |      |
| Pc_TC038736 | 0.79  | 0.04 |      | 1.72  | 0         | Up   | -3.55 | 0         | Down | -1.6  | 0.01  | Down | GRAM domain family protein                                               |      |
| Pc_TC038754 | -0.45 | 0.78 |      | -0.64 | 0.7       |      | 2.34  | 0.07      |      | 2.09  | 0.03  | Up   | growth-regulating factor 2                                               | GRF  |
| Pc_TC038768 | 1.13  | 0.25 |      | -0.58 | 0.72      |      | -0.3  | 0.89      |      | 2.05  | 0.03  | Up   | Terpenoid cyclases/Protein prenyltransferases superfamily protein        |      |
| Pc_TC038803 | 2.58  | 0.07 |      | 3.17  | 0.02      | Up   | 0.24  | 1         |      | 1.04  | 0.66  |      | Putative uncharacterized protein                                         |      |
| Pc_TC038811 | 0.93  | 0.17 |      | 1.73  | 0.02      | Up   | -1    | 0.42      |      | 0.36  | 0.67  |      | polyol/monosaccharide transporter 1                                      |      |
| Pc_TC038829 | -0.28 | 0.59 |      | 1.2   | 0.04      | Up   | -0.87 | 0.39      |      | -0.63 | 0.35  |      | cytochrome oxidase                                                       |      |
| Pc_TC038832 | -1.88 | 0.06 |      | -0.98 | 0.35      |      | -2.82 | 0.06      |      | -2.5  | 0.03  | Down | Sec-independent periplasmic protein translocase                          |      |
| Pc_TC038846 | 1.08  | 0.33 |      | 2.12  | 0.04      | Up   | -0.79 | 0.68      |      | 0.25  | 0.9   |      | structural constituent of ribosome;protein binding                       |      |
| Pc_TC038850 | 0.36  | 0.79 |      | -1.75 | 0.28      |      | 2.57  | 0.04      | Up   | 1.03  | 0.35  |      | S-domain-2 5                                                             |      |
| Pc_TC038865 | 0.4   | 0.85 |      | 0.38  | 0.87      |      | 2.9   | 0.03      | Up   | 1.08  | 0.41  |      | phenylalanyl-tRNA synthetase class IIc family protein                    |      |
| Pc_TC038866 | -1.85 | 0.01 | Down | -0.15 | 0.86      |      | 0.41  | 0.71      |      | -0.1  | 0.91  |      | dehydroquininate dehydratase,putative / shikimate dehydrogenase,putative |      |
| Pc_TC038878 | -1.96 | 0.01 | Down | -0.37 | 0.66      |      | 0.73  | 0.51      |      | 0.27  | 0.73  |      | Galactose oxidase/kelch repeat superfamily protein                       |      |
| Pc_TC038906 | 0.7   | 0.13 |      | -0.43 | 0.49      |      | 0.3   | 0.76      |      | 1.45  | 0.02  | Up   | Uncharacterized protein                                                  |      |
| Pc_TC038919 | -0.33 | 0.64 |      | -0.39 | 0.63      |      | 2.19  | 0.04      | Up   | 0.65  | 0.38  |      | Minichromosome maintenance (MCM2/3/5) family protein                     |      |
| Pc_TC038933 | 0.32  | 0.62 |      | -0.19 | 0.81      |      | 2.28  | 0.03      | Up   | 1.12  | 0.11  |      | Metallopeptidase M24 family protein                                      |      |
| Pc_TC038934 | -0.79 | 0.21 |      | -1.54 | 0.05      | Down | -0.45 | 0.67      |      | 0.15  | 0.84  |      | Metallopeptidase M24 family protein                                      |      |
| Pc_TC038935 | -1.55 | 0.03 | Down | -2.07 | 0.01      | Down | -0.82 | 0.46      |      | -0.15 | 0.85  |      | Metallopeptidase M24 family protein                                      |      |
| Pc_TC038938 | 0.69  | 0.07 |      | 0.74  | 0.13      |      | -2.26 | 0.02      | Down | -0.26 | 0.65  |      | myb domain protein 78                                                    | MYB  |
| Pc_TC038939 | -0.62 | 0.68 |      | 0.61  | 0.65      |      | 2.67  | 0.04      | Up   | 1.81  | 0.07  |      | Photosystem II reaction center PsbP family protein                       |      |
| Pc_TC038954 | -1.44 | 0.01 | Down | -2.52 | 0         | Down | 0.08  | 0.94      |      | -1.9  | 0.01  | Down | Metallothionein-like protein 4C                                          |      |
| Pc_TC038964 | 0.91  | 0.47 |      | 1.98  | 0.08      |      | 2.31  | 0.1       |      | 2.16  | 0.04  | Up   | myb-like HTH transcriptional regulator family protein                    | MYB  |
| Pc_TC038970 | -0.63 | 0.41 |      | 0.06  | 0.97      |      | -2.79 | 0.04      | Down | -2.56 | 0.01  | Down | Putative uncharacterized protein                                         |      |
| Pc_TC038975 | 0.53  | 0.33 |      | 1.24  | 0.04      | Up   | 0.87  | 0.39      |      | 0.99  | 0.13  |      | TBP-associated factor 8                                                  |      |
| Pc_TC038980 | -1.14 | 0.04 | Down | -1.42 | 0.04      | Down | 1.37  | 0.16      |      | 0.23  | 0.73  |      | Purple acid phosphatases superfamily protein                             |      |
| Pc_TC038981 | -0.38 | 0.44 |      | -1.36 | 0.03      | Down | 1.3   | 0.17      |      | 0.58  | 0.35  |      | Purple acid phosphatases superfamily protein                             |      |
| Pc_TC038984 | -3.09 | 0.04 | Down | -0.41 | 0.78      |      | -0.21 | 0.92      |      | -0.84 | 0.5   |      | TPX2 (targeting protein for XkIp2) protein family                        |      |
| Pc_TC038988 | -0.55 | 0.43 |      | -1.71 | 0.05      | Down | -1.78 | 0.13      |      | -1.57 | 0.06  |      | Protein of unknown function (DUF1336)                                    |      |
| Pc_TC038995 | 1.2   | 0.15 |      | 1.77  | 0.05      | Up   | 0.17  | 0.93      |      | 0.75  | 0.45  |      | Amino acid permease family protein                                       |      |
| Pc_TC039002 | 0.63  | 0.37 |      | 1.76  | 0.02      | Up   | -0.03 | 1         |      | 0.33  | 0.7   |      | cytochrome P450, family 81, subfamily D, polypeptide 3                   |      |
| Pc_TC039003 | 0.92  | 0.07 |      | 0.76  | 0.22      |      | -3.55 | 0         | Down | -2.02 | 0.01  | Down | cytochrome P450, family 81, subfamily G, polypeptide 1                   |      |
| Pc_TC039008 | 0.61  | 0.23 |      | 0.91  | 0.13      |      | -4.12 | 0         | Down | -1.9  | 0.01  | Down | Expressed protein                                                        |      |
| Pc_TC039023 | -1.08 | 0.1  |      | -0.54 | 0.47      |      | 2.05  | 0.04      | Up   | 1.24  | 0.07  |      | phragmoplast orienting kinesin 2                                         |      |
| Pc_TC039031 | 0.34  | 0.71 |      | 2.12  | 0.01      | Up   | -3.82 | 0.02      | Down | -1.11 | 0.29  |      | Transducin/WD40 repeat-like superfamily protein                          |      |
| Pc_TC039038 | -1.58 | 0.04 | Down | 0.29  | 0.71      |      | 0.67  | 0.54      |      | 0.42  | 0.59  |      | BTB/POZ domain-containing protein                                        |      |
| Pc_TC039055 | -1.35 | 0.04 | Down | -1.04 | 0.16      |      | -0.22 | 0.84      |      | -0.57 | 0.44  |      | bZIP transcription factor family protein                                 | bZIP |
| Pc_TC039073 | -0.72 | 0.38 |      | -1.69 | 0.09      |      | -4.05 | 0.01      | Down | -1.34 | 0.16  |      | homocysteine methyltransferase 2                                         |      |
| Pc_TC039086 | 0.31  | 0.64 |      | -1.26 | 0.14      |      | 1.5   | 0.16      |      | 1.52  | 0.03  | Up   | Uncharacterised protein family (UPF0497)                                 |      |
| Pc_TC039093 | -1.94 | 0.02 | Down | -1.19 | 0.17      |      | 0.73  | 0.51      |      | 0.31  | 0.7   |      | galactose-1-phosphate guanylyltransferase (GDP)s                         |      |

|             |       |       |      |       |           |      |       |           |      |       |       |      |                                                                                  |    |
|-------------|-------|-------|------|-------|-----------|------|-------|-----------|------|-------|-------|------|----------------------------------------------------------------------------------|----|
| Pc_TC039094 | -0.67 | 0.1   |      | -0.83 | 0.11      |      | 1.73  | 0.05      | Up   | 1.01  | 0.06  |      | Homeobox-leucine zipper family protein / lipid-binding START domain-containing p | HB |
| Pc_TC039098 | -0.61 | 0.36  |      | -0.87 | 0.27      |      | 0.58  | 0.59      |      | 1.42  | 0.04  | Up   | Phototropic-responsive NPH3 family protein                                       |    |
| Pc_TC039111 | -1.92 | 0.17  |      | -3.94 | 0.05      | Down | 0.59  | 0.69      |      | 0.91  | 0.39  |      | S-adenosyl-L-methionine-dependent methyltransferases superfamily protein         |    |
| Pc_TC039125 | 0.46  | 0.4   |      | 1.2   | 0.05      |      | -3.75 | 0         | Down | -1.61 | 0.03  | Down | nine-cis-epoxycarotenoid dioxygenase 3                                           |    |
| Pc_TC039132 | 0.46  | 0.12  |      | 0.95  | 0.01      |      | -2.06 | 0.02      | Down | -1.47 | 0     | Down | unknown protein                                                                  |    |
| Pc_TC039140 | 0.51  | 0.15  |      | 0.24  | 0.6       |      | 1.84  | 0.03      | Up   | 0.26  | 0.62  |      | Protein of unknown function (DUF1637)                                            |    |
| Pc_TC039145 | 0.19  | 0.53  |      | -0.33 | 0.42      |      | 1.04  | 0.21      |      | 1.17  | 0.02  | Up   | Cobalamin-independent synthase family protein                                    |    |
| Pc_TC039154 | -1.66 | 0.02  | Down | 0     | 1         |      | 0.2   | 0.86      |      | -0.37 | 0.63  |      | unknown protein                                                                  |    |
| Pc_TC039155 | -0.22 | 0.52  |      | -0.63 | 0.15      |      | 1.69  | 0.05      | Up   | 0.32  | 0.53  |      | PHYTOENE SYNTHASE                                                                |    |
| Pc_TC039177 | 1.03  | 0.31  |      | 1.54  | 0.14      |      | 2.54  | 0.04      | Up   | 2.28  | 0.02  | Up   | purple acid phosphatase 10                                                       |    |
| Pc_TC039180 | -0.6  | 0.36  |      | -0.06 | 0.95      |      | 2.1   | 0.04      | Up   | 1.55  | 0.02  | Up   | Leucine-rich repeat protein kinase family protein                                |    |
| Pc_TC039196 | 0.89  | 0.01  |      | -7.11 | 9.81E-023 | Down | 0.96  | 0.26      |      | -0.32 | 0.55  |      | actin-11                                                                         |    |
| Pc_TC039204 | 0     | 0.06  |      | 0.7   | 0.65      |      | 3.55  | 0.01      | Up   | 2.13  | 0.05  | Up   | Expressed protein                                                                |    |
| Pc_TC039218 | 0.02  | 0.96  |      | 0.18  | 0.71      |      | -4.3  | 4.84E-005 | Down | -3.14 | ##### | Down | Expressed protein                                                                |    |
| Pc_TC039227 | 3.47  | 0     | Up   | 0     | 0.36      |      | 0.96  | 0.69      |      | -0.37 | 0.99  |      | vacuolar proton ATPase A2                                                        |    |
| Pc_TC039266 | 2.11  | 0.02  | Up   | 0     | 0.05      |      | 1.72  | 0.22      |      | -0.13 | 0.99  |      | Ras-related small GTP-binding family protein                                     |    |
| Pc_TC039268 | 0.31  | 0.81  |      | 1.53  | 0.12      |      | -4.58 | 0.03      | Down | -0.56 | 0.68  |      | Expressed protein                                                                |    |
| Pc_TC039305 | -3.17 | 0.04  | Down | -1.6  | 0.25      |      | -1.74 | 0.28      |      | -1.16 | 0.35  |      | Expressed protein                                                                |    |
| Pc_TC039339 | 0.66  | 0.53  |      | -1.36 | 0.36      |      | 0     | 0.01      |      | -3.37 | 0.04  | Down | Uncharacterized protein                                                          |    |
| Pc_TC039341 | 0.33  | 0.68  |      | 0.31  | 0.74      |      | -2.89 | 0.04      | Down | -1.37 | 0.16  |      | Expressed protein                                                                |    |
| Pc_TC039362 | 0.58  | 0.04  |      | 0.74  | 0.05      |      | -1.8  | 0.03      | Down | -0.14 | 0.77  |      | Expressed protein                                                                |    |
| Pc_TC039376 | 4.21  | 0     | Up   | 0     | 0.67      |      | 0.09  | 1         |      | 0     | 0.54  |      | Expressed protein                                                                |    |
| Pc_TC039380 | 2.12  | 0.03  | Up   | 0     | 0.09      |      | 1.83  | 0.21      |      | 0.36  | 0.85  |      | casein kinase 1                                                                  |    |
| Pc_TC039387 | 2.6   | 0.04  | Up   | 0     | 0.36      |      | 1.96  | 0.27      |      | 1.53  | 0.35  |      | Expressed protein                                                                |    |
| Pc_TC039404 | 1.87  | 0.03  | Up   | 0     | 0.02      |      | 1.7   | 0.19      |      | 0.58  | 0.63  |      | Uncharacterized protein                                                          |    |
| Pc_TC039410 | -3.09 | 0.02  | Down | -2.7  | 0.05      | Down | 0     | 0         |      | -3.54 | 0.01  | Down | Ribosomal protein S24e family protein                                            |    |
| Pc_TC039420 | 0     | 0.31  |      | 0.06  | 1         |      | 5.15  | 0         | Up   | 2.67  | 0.04  | Up   | Expressed protein                                                                |    |
| Pc_TC039423 | 0.32  | 0.38  |      | 0.6   | 0.19      |      | -3.43 | 0         | Down | -2.55 | ##### | Down | Expressed protein                                                                |    |
| Pc_TC039426 | 3.69  | ##### | Up   | 0     | 0.11      |      | 3.73  | 0         | Up   | 1.48  | 0.23  |      | Expressed protein                                                                |    |
| Pc_TC039449 | 0.99  | 0.45  |      | -0.13 | 1         |      | 1.93  | 0.19      |      | 2.38  | 0.03  | Up   | receptor like protein 52                                                         |    |
| Pc_TC039478 | -0.69 | 0.17  |      | -1.86 | 0         | Down | -1.05 | 0.3       |      | -0.54 | 0.4   |      | Expressed protein                                                                |    |
| Pc_TC039486 | 0.93  | 0.6   |      | -2.26 | 0.5       |      | 3.59  | 0.01      | Up   | 2.66  | 0.03  | Up   | Expressed protein                                                                |    |
| Pc_TC039501 | 2.17  | 0.03  | Up   | 2.06  | 0.08      |      | 1.36  | 0.39      |      | 1.27  | 0.32  |      | Expressed protein                                                                |    |
| Pc_TC039514 | 1.66  | 0.72  |      | 2.06  | 0.59      |      | 4.36  | 0.04      | Up   | 3.53  | 0.09  |      | Expressed protein                                                                |    |
| Pc_TC039531 | -0.74 | 0.45  |      | -1.26 | 0.26      |      | 3.66  | 0         | Up   | 1.56  | 0.06  |      | Expressed protein                                                                |    |
| Pc_TC039535 | 0.94  | 0.25  |      | 0.26  | 0.83      |      | 0.5   | 0.71      |      | 2.26  | 0.01  | Up   | Expressed protein                                                                |    |
| Pc_TC039540 | 2.54  | 0.05  | Up   | 2.64  | 0.05      |      | 1.67  | 0.38      |      | 0.63  | 0.82  |      | Expressed protein                                                                |    |
| Pc_TC039543 | 0.27  | 0.65  |      | 0.29  | 0.68      |      | -4.87 | 0         | Down | -3.52 | ##### | Down | Expressed protein                                                                |    |
| Pc_TC039546 | -0.34 | 1     |      | 2.87  | 0.03      | Up   | 0     | 0.26      |      | 0     | 0.24  |      | Expressed protein                                                                |    |
| Pc_TC039580 | 1.71  | 0.02  | Up   | 0     | 0         |      | 1.14  | 0.35      |      | -0.23 | 0.85  |      | UniRef100                                                                        |    |
| Pc_TC039586 | 1.82  | 0.14  |      | 0.8   | 0.67      |      | 3.56  | 0.01      | Up   | 1.04  | 0.5   |      | Expressed protein                                                                |    |
| Pc_TC039592 | -0.34 | 1     |      | 2.92  | 0.03      | Up   | 0     | 0.26      |      | 0     | 0.24  |      | Expressed protein                                                                |    |
| Pc_TC039598 | 1.35  | 0     | Up   | 1.15  | 0.04      | Up   | -1.49 | 0.15      |      | 1.2   | 0.05  | Up   | Expressed protein                                                                |    |
| Pc_TC039609 | -2.67 | 0     | Down | 0     | 7.12E-009 |      | -6.5  | 2.94E-005 | Down | 0     | ##### |      | Uncharacterized protein                                                          |    |
| Pc_TC039619 | 0.08  | 1     |      | -0.2  | 1         |      | 3.01  | 0.04      | Up   | 1.74  | 0.18  |      | Expressed protein                                                                |    |
| Pc_TC039620 | -0.3  | 0.88  |      | -0.32 | 0.88      |      | -1.39 | 0.44      |      | -4.08 | 0.04  | Down | Expressed protein                                                                |    |
| Pc_TC039624 | -0.71 | 0.56  |      | -1.6  | 0.25      |      | -3.74 | 0.05      | Down | -3.62 | 0.02  | Down | Expressed protein                                                                |    |
| Pc_TC039626 | -1.56 | 0.04  | Down | -1.96 | 0.03      | Down | 0.4   | 0.72      |      | -1.13 | 0.17  |      | EDM2-like protein1                                                               |    |
| Pc_TC039627 | -2.01 | 0.02  | Down | -1.19 | 0.18      |      | 1.07  | 0.33      |      | 0.08  | 0.93  |      | ENHANCED DOWNY MILDEW 2                                                          |    |
| Pc_TC039630 | 3.89  | 0     | Up   | 0     | 0.67      |      | 1.09  | 0.77      |      | 0.63  | 0.96  |      | Expressed protein                                                                |    |
| Pc_TC039634 | 3.99  | 0.03  | Up   | 0     | 1         |      | 2.83  | 0.32      |      | 2.21  | 0.47  |      | Expressed protein                                                                |    |
| Pc_TC039637 | 2.66  | 0.03  | Up   | 0     | 0.36      |      | -0.5  | 0.95      |      | -2.37 | 0.46  |      | Eukaryotic rpb5 RNA polymerase subunit family protein                            |    |
| Pc_TC039641 | 2.27  | 0.01  | Up   | 0     | 0.02      |      | 1.19  | 0.39      |      | 0.14  | 0.96  |      | ARM repeat superfamily protein                                                   |    |
| Pc_TC039651 | -1.92 | 0.1   |      | -0.83 | 0.49      |      | -1.38 | 0.35      |      | -2.64 | 0.04  | Down | Expressed protein                                                                |    |
| Pc_TC039677 | 0.27  | 0.67  |      | 1.39  | 0.04      | Up   | -0.5  | 0.66      |      | -0.13 | 0.87  |      | Expressed protein                                                                |    |
| Pc_TC039684 | 0.66  | 0.58  |      | 2.38  | 0.02      | Up   | -0.38 | 0.86      |      | -0.05 | 1     |      | Expressed protein                                                                |    |
| Pc_TC039688 | 2.13  | 0.05  | Up   | 1.89  | 0.13      |      | 0     | 0.11      |      | -3.18 | 0.19  |      | H0515C11.6 protein                                                               |    |
| Pc_TC039713 | 2.51  | 0.03  | Up   | 0     | 0.27      |      | 1.7   | 0.32      |      | -0.7  | 0.83  |      | Expressed protein                                                                |    |
| Pc_TC039736 | 0.13  | 0.92  |      | 0.4   | 0.69      |      | -3.4  | 0.03      | Down | -1.28 | 0.23  |      | Expressed protein                                                                |    |
| Pc_TC039761 | 2.78  | 0.02  | Up   | 0     | 0.36      |      | 1.96  | 0.27      |      | -0.37 | 0.99  |      | Expressed protein                                                                |    |
| Pc_TC039792 | 3.78  | 0     | Up   | 0     | 0.36      |      | 2.46  | 0.14      |      | 1.53  | 0.35  |      | Expressed protein                                                                |    |
| Pc_TC039795 | 0.25  | 0.79  |      | 0.27  | 0.8       |      | 2.39  | 0.04      | Up   | 1.57  | 0.06  |      | Expressed protein                                                                |    |

|             |       |       |      |  |       |           |      |  |       |           |      |       |       |      |                                                                  |     |
|-------------|-------|-------|------|--|-------|-----------|------|--|-------|-----------|------|-------|-------|------|------------------------------------------------------------------|-----|
| Pc_TC039801 | 1.08  | 0.57  |      |  | 2.15  | 0.15      |      |  | 3.57  | 0.02      | Up   | 2.71  | 0.04  | Up   | Expressed protein                                                |     |
| Pc_TC039819 | 0.41  | 0.43  |      |  | 0.93  | 0.12      |      |  | -5.98 | 1.31E-005 | Down | -1.72 | 0.02  | Down | Uncharacterized protein                                          |     |
| Pc_TC039820 | 3.23  | ##### | Up   |  | 0     | 0         |      |  | 2.71  | 0.02      | Up   | 1.69  | 0.06  |      | Expressed protein                                                |     |
| Pc_TC039834 | 0.66  | 0.49  |      |  | 0.2   | 0.9       |      |  | 1.29  | 0.31      |      | 2.15  | 0.01  | Up   | Expressed protein                                                |     |
| Pc_TC039838 | -0.46 | 0.57  |      |  | -2.36 | 0.03      | Down |  | 0.85  | 0.46      |      | 0.36  | 0.68  |      | putative,unclassified                                            |     |
| Pc_TC039845 | -0.84 | 0.31  |      |  | -0.39 | 0.68      |      |  | -1.94 | 0.14      |      | -2.67 | 0.01  | Down | Expressed protein                                                |     |
| Pc_TC039857 | 0.08  | 1     |      |  | 0.06  | 1         |      |  | 2.09  | 0.24      |      | 2.87  | 0.02  | Up   | Expressed protein                                                |     |
| Pc_TC039866 | 3.08  | 0.05  | Up   |  | 0     | 0.67      |      |  | 2.31  | 0.3       |      | -1.37 | 0.88  |      | Expressed protein                                                |     |
| Pc_TC039873 | 0.94  | 0.41  |      |  | -1.4  | 0.44      |      |  | 2.83  | 0.03      | Up   | 1.21  | 0.29  |      | Expressed protein                                                |     |
| Pc_TC039880 | 3.78  | 0.01  | Up   |  | 0     | 0.67      |      |  | 3.83  | 0.03      | Up   | 0.95  | 0.81  |      | Expressed protein                                                |     |
| Pc_TC039902 | 1.04  | 0.1   |      |  | 0.89  | 0.24      |      |  | -2.8  | 0.03      | Down | -1.57 | 0.08  |      | Expressed protein                                                |     |
| Pc_TC039904 | 1.08  | 0.57  |      |  | 2.87  | 0.03      | Up   |  | -1.5  | 0.66      |      | 0.21  | 1     |      | Expressed protein                                                |     |
| Pc_TC039919 | -1.07 | 0.17  |      |  | 0.45  | 0.58      |      |  | -0.88 | 0.46      |      | -2.58 | 0.01  | Down | Expressed protein                                                |     |
| Pc_TC039956 | -0.31 | 0.52  |      |  | -0.73 | 0.23      |      |  | -1.51 | 0.14      |      | -1.47 | 0.03  | Down | Expressed protein                                                |     |
| Pc_TC039977 | -1.3  | 0.1   |      |  | -2.53 | 0.01      | Down |  | 1.47  | 0.18      |      | -0.19 | 0.83  |      | Expressed protein                                                |     |
| Pc_TC039992 | -0.09 | 1     |      |  | 0.41  | 0.74      |      |  | 3.75  | 0         | Up   | 1.95  | 0.03  | Up   | Expressed protein                                                |     |
| Pc_TC040003 | 0.86  | 0.41  |      |  | -0.05 | 1         |      |  | 2.37  | 0.06      |      | 1.93  | 0.05  | Up   | Expressed protein                                                |     |
| Pc_TC040007 | -0.58 | 0.63  |      |  | -1.02 | 0.45      |      |  | -2.42 | 0.15      |      | -3.04 | 0.04  | Down | Expressed protein                                                |     |
| Pc_TC040057 | 2.28  | 0.01  | Up   |  | 0     | 0.07      |      |  | 2.27  | 0.1       |      | -0.37 | 0.86  |      | LAG1 longevity assurance homolog 3                               |     |
| Pc_TC040066 | -0.21 | 0.79  |      |  | 0.52  | 0.51      |      |  | -4.22 | 0         | Down | -2.17 | 0.02  | Down | Expressed protein                                                |     |
| Pc_TC040079 | 2.4   | 0.03  | Up   |  | 0     | 0.2       |      |  | 1.5   | 0.37      |      | 0.04  | 1     |      | Eukaryotic translation initiation factor 3 subunit 7 (eIF-3)     |     |
| Pc_TC040095 | -0.27 | 0.76  |      |  | -4.33 | 0         | Down |  | 0.34  | 0.79      |      | 0.23  | 0.81  |      | Expressed protein                                                |     |
| Pc_TC040098 | -0.61 | 0.06  |      |  | -1.67 | 9.59E-005 | Down |  | 1.47  | 0.08      |      | 0.65  | 0.19  |      | Expressed protein                                                |     |
| Pc_TC040102 | -0.69 | 0.59  |      |  | -0.86 | 0.54      |      |  | -1.78 | 0.28      |      | -3.46 | 0.03  | Down | Expressed protein                                                |     |
| Pc_TC040104 | -4.09 | 0.02  | Down |  | -1.3  | 0.35      |      |  | -0.42 | 0.8       |      | -0.96 | 0.45  |      | Expressed protein                                                |     |
| Pc_TC040110 | -0.7  | 0.44  |      |  | -2.53 | 0.03      | Down |  | 1.03  | 0.38      |      | 0.01  | 1     |      | Expressed protein                                                |     |
| Pc_TC040116 | 0.97  | 0.12  |      |  | 0.91  | 0.22      |      |  | 0.54  | 0.63      |      | 1.63  | 0.02  | Up   | Expressed protein                                                |     |
| Pc_TC040157 | 3.44  | 0     | Up   |  | 0     | 0.36      |      |  | 2.83  | 0.08      |      | 0.8   | 0.73  |      | Expressed protein                                                |     |
| Pc_TC040158 | 0.06  | 0.91  |      |  | 0.1   | 0.87      |      |  | -3.01 | 0.01      | Down | -1.4  | 0.04  | Down | Expressed protein                                                |     |
| Pc_TC040161 | 1.99  | 0.03  | Up   |  | 0     | 0.04      |      |  | 1.75  | 0.2       |      | -0.5  | 0.76  |      | Expressed protein                                                |     |
| Pc_TC040166 | 0.81  | 0.01  |      |  | -1.73 | 0         | Down |  | 0.85  | 0.32      |      | -0.07 | 0.89  |      | GTP binding Elongation factor Tu family protein                  |     |
| Pc_TC040174 | 2.37  | 0     | Up   |  | 0     | 8.53E-005 |      |  | 1.62  | 0.15      |      | 0.36  | 0.69  |      | ubiquitin extension protein 1                                    |     |
| Pc_TC040185 | -0.43 | 0.44  |      |  | -1.56 | 0.03      | Down |  | 0.6   | 0.55      |      | 0.15  | 0.83  |      | Expressed protein                                                |     |
| Pc_TC040197 | -0.07 | 0.98  |      |  | 0.77  | 0.41      |      |  | 0     | 0         |      | -4.28 | 0     | Down | Expressed protein                                                |     |
| Pc_TC040202 | 0.34  | 0.43  |      |  | 0.44  | 0.41      |      |  | -5.06 | 1.82E-005 | Down | -3.47 | ##### | Down | Os08g0236200 protein                                             |     |
| Pc_TC040217 | 2.34  | 0     | Up   |  | 0     | 0.02      |      |  | 1.25  | 0.36      |      | -0.6  | 0.68  |      | Expressed protein                                                |     |
| Pc_TC040230 | -1.24 | 0.47  |      |  | -0.68 | 0.73      |      |  | 2.84  | 0.03      | Up   | 2.35  | 0.02  | Up   | Expressed protein                                                |     |
| Pc_TC040232 | -0.36 | 0.76  |      |  | 0.78  | 0.43      |      |  | -4.02 | 0.03      | Down | -4.9  | 0     | Down | Expressed protein                                                |     |
| Pc_TC040234 | 3.53  | ##### | Up   |  | 0     | 0.02      |      |  | 1.23  | 0.36      |      | 0.33  | 0.81  |      | Expressed protein                                                |     |
| Pc_TC040259 | -1.73 | 0.16  |      |  | -0.16 | 0.93      |      |  | -1.89 | 0.23      |      | -2.77 | 0.04  | Down | Expressed protein                                                |     |
| Pc_TC040270 | 0.27  | 0.86  |      |  | 1.2   | 0.27      |      |  | 2.81  | 0.02      | Up   | 1.72  | 0.08  |      | Expressed protein                                                |     |
| Pc_TC040273 | 0.55  | 0.28  |      |  | 1.21  | 0.04      | Up   |  | -5.32 | 4.60E-005 | Down | -3.95 | ##### | Down | Expressed protein                                                |     |
| Pc_TC040324 | 3.23  | 0     | Up   |  | 0     | 0.11      |      |  | 2.06  | 0.16      |      | 1.53  | 0.21  |      | 20S proteasome beta subunit PBB2                                 |     |
| Pc_TC040331 | 1.78  | 0.02  | Up   |  | 0     | 0         |      |  | 2.28  | 0.05      |      | 0.49  | 0.62  |      | Expressed protein                                                |     |
| Pc_TC040341 | -1.99 | 0.11  |      |  | -3.33 | 0.04      | Down |  | 1.04  | 0.42      |      | 0.04  | 1     |      | Expressed protein                                                |     |
| Pc_TC040348 | -0.68 | 0.54  |      |  | 0.3   | 0.81      |      |  | -3.96 | 0.03      | Down | -2.51 | 0.06  |      | heat shock protein 81-2                                          |     |
| Pc_TC040386 | -0.92 | 1     |      |  | 3.31  | 0.04      | Up   |  | 1.5   | 0.6       |      | 1.63  | 0.49  |      | Cuticular protein PxutCPT1                                       |     |
| Pc_TC040387 | 3.17  | ##### | Up   |  | 0     | 0         |      |  | 2.87  | 0.01      | Up   | 0.35  | 0.74  |      | Expressed protein                                                |     |
| Pc_TC040393 | -0.47 | 0.71  |      |  | -0.1  | 0.98      |      |  | -0.74 | 0.63      |      | -3.04 | 0.04  | Down | Expressed protein                                                |     |
| Pc_TC040407 | -0.42 | 0.54  |      |  | -0.93 | 0.26      |      |  | -2.66 | 0.03      | Down | -2.08 | 0.02  | Down | Expressed protein                                                |     |
| Pc_TC040416 | -2.12 | 0.08  |      |  | -0.56 | 0.65      |      |  | -2.44 | 0.13      |      | -2.9  | 0.03  | Down | Expressed protein                                                |     |
| Pc_TC040440 | 1.98  | 0.03  | Up   |  | 0     | 0.05      |      |  | 1.5   | 0.29      |      | 0.63  | 0.64  |      | glycine rich protein 2                                           | CSD |
| Pc_TC040477 | -3.51 | 0.08  |      |  | -1.53 | 0.38      |      |  | 2.65  | 0.04      | Up   | -0.26 | 0.9   |      | Expressed protein                                                |     |
| Pc_TC040479 | -2.62 | 0.03  | Down |  | -0.83 | 0.47      |      |  | 0.45  | 0.74      |      | -0.03 | 1     |      | Putative uncharacterized protein                                 |     |
| Pc_TC040516 | 2.49  | 0.02  | Up   |  | 2.47  | 0.04      | Up   |  | -0.27 | 0.98      |      | -1.96 | 0.4   |      | Expressed protein                                                |     |
| Pc_TC040527 | 2.08  | 0.2   |      |  | 1.93  | 0.29      |      |  | 2.31  | 0.22      |      | 3.17  | 0.02  | Up   | Expressed protein                                                |     |
| Pc_TC040528 | 1.84  | 0.16  |      |  | 1.64  | 0.28      |      |  | 3.47  | 0.02      | Up   | 2.89  | 0.01  | Up   | Expressed protein                                                |     |
| Pc_TC040555 | 3.08  | ##### | Up   |  | 0     | 0.02      |      |  | 2.25  | 0.08      |      | 0.46  | 0.72  |      | E3 ubiquitin ligase SCF complex subunit SKP1/ASK1 family protein |     |
| Pc_TC040559 | 1.86  | 0.1   |      |  | 2.2   | 0.06      |      |  | 2.8   | 0.05      | Up   | 1.68  | 0.18  |      | Expressed protein                                                |     |
| Pc_TC040581 | 1.38  | 0.15  |      |  | -0.64 | 0.7       |      |  | 2.36  | 0.07      |      | 2.11  | 0.03  | Up   | Expressed protein                                                |     |
| Pc_TC040590 | 2.86  | ##### | Up   |  | 0     | 0         |      |  | 1.84  | 0.12      |      | 0.96  | 0.29  |      | cytochrome P450, family 72, subfamily A, polypeptide 7           |     |
| Pc_TC040604 | 1.4   | 0.61  |      |  | 2.87  | 0.11      |      |  | 3.09  | 0.11      |      | 3.38  | 0.03  | Up   | Expressed protein                                                |     |

|             |       |       |      |       |      |      |       |      |      |       |      |      |                                                                          |      |
|-------------|-------|-------|------|-------|------|------|-------|------|------|-------|------|------|--------------------------------------------------------------------------|------|
| Pc_TC040611 | 0.36  | 0.52  |      | 0.18  | 0.8  |      | -2.05 | 0.07 |      | -1.57 | 0.04 | Down | Hydrophobic protein LT16A                                                |      |
| Pc_TC040612 | 0.69  | 0.25  |      | 1.18  | 0.08 |      | -2.59 | 0.03 | Down | -1.16 | 0.15 |      | Expressed protein                                                        |      |
| Pc_TC040619 | -0.46 | 0.74  |      | 0.45  | 0.73 |      | 0     | 0.01 |      | -3.37 | 0.04 | Down | Expressed protein                                                        |      |
| Pc_TC040643 | 0.28  | 0.76  |      | 1.88  | 0.02 | Up   | -0.63 | 0.64 |      | -1.03 | 0.32 |      | Nucleic acid-binding,OB-fold-like protein                                |      |
| Pc_TC040652 | -0.11 | 0.99  |      | 2.04  | 0.03 | Up   | -2.91 | 0.12 |      | -1.37 | 0.31 |      | Expressed protein                                                        |      |
| Pc_TC040661 | 3.6   | 0.01  | Up   | 0     | 0.67 |      | 3.09  | 0.11 |      | 1.43  | 0.58 |      | signal peptide peptidase                                                 |      |
| Pc_TC040677 | -0.6  | 0.79  |      | 0.06  | 1    |      | 2.77  | 0.04 | Up   | 0.87  | 0.54 |      | uncharacterized protein                                                  |      |
| Pc_TC040680 | -1.84 | 0.04  | Down | 0.03  | 1    |      | 1.23  | 0.27 |      | 1.29  | 0.1  |      | Expressed protein                                                        |      |
| Pc_TC040689 | 1.02  | 0.05  | Up   | 0.44  | 0.51 |      | 1.25  | 0.21 |      | 0.9   | 0.17 |      | Expressed protein                                                        |      |
| Pc_TC040691 | -0.02 | 1     |      | -0.44 | 0.69 |      | -3.13 | 0.05 | Down | -1.52 | 0.16 |      | Os07g0531700 protein                                                     |      |
| Pc_TC040693 | -1.36 | 0.12  |      | 0.53  | 0.53 |      | -4.02 | 0.01 | Down | -3.58 | 0    | Down | Transposon mutator sub-class                                             |      |
| Pc_TC040713 | -2.09 | 0.12  |      | -0.41 | 0.78 |      | -4.67 | 0.03 | Down | -1.96 | 0.15 |      | Expressed protein                                                        |      |
| Pc_TC040725 | 2.4   | 0.19  |      | 4.89  | 0    | Up   | 0.09  | 1    |      | 1.21  | 0.69 |      | beta-amylase 3                                                           |      |
| Pc_TC040726 | 4.03  | ##### | Up   | 0     | 0.2  |      | 3.09  | 0.03 | Up   | 0.85  | 0.61 |      | glutathione S-transferase THETA 1                                        |      |
| Pc_TC040733 | -1.92 | 0.17  |      | -3.94 | 0.05 | Down | -2.91 | 0.12 |      | 0     | 0.01 |      | Expressed protein                                                        |      |
| Pc_TC040766 | 0.29  | 0.81  |      | 0.51  | 0.66 |      | -3.74 | 0.05 | Down | -1.3  | 0.3  |      | Expressed protein                                                        |      |
| Pc_TC040770 | 2.19  | 0.01  | Up   | 0     | 0.03 |      | 1.45  | 0.29 |      | -0.27 | 0.89 |      | Expressed protein                                                        |      |
| Pc_TC040808 | 2.22  | 0.02  | Up   | 0     | 0.07 |      | 1.85  | 0.19 |      | 0.76  | 0.56 |      | Expressed protein                                                        |      |
| Pc_TC040820 | -2.73 | 0.05  | Down | -3.33 | 0.04 | Down | -2.89 | 0.09 |      | 0     | 0    |      | Expressed protein                                                        |      |
| Pc_TC040834 | 0.11  | 0.85  |      | -0.22 | 0.75 |      | -2.83 | 0.01 | Down | 0.09  | 0.9  |      | SOS ribosomal protein L32, chloroplastic                                 |      |
| Pc_TC040835 | -0.06 | 0.84  |      | -0.25 | 0.55 |      | -1.66 | 0.05 |      | -1.36 | 0.01 | Down | Protein kinase superfamily protein                                       |      |
| Pc_TC040848 | 0.51  | 0.63  |      | 0.67  | 0.56 |      | -4.58 | 0.03 | Down | -1.14 | 0.38 |      | Expressed protein                                                        |      |
| Pc_TC040884 | 2.78  | 0     | Up   | 1.93  | 0.04 | Up   | 2.11  | 0.09 |      | 1.66  | 0.07 |      | laccase 7                                                                |      |
| Pc_TC040925 | 2.23  | 0.04  | Up   | 0     | 0.15 |      | 1.28  | 0.44 |      | -1.6  | 0.44 |      | Uncharacterized protein                                                  |      |
| Pc_TC040926 | 0.08  | 1     |      | 2.38  | 0.04 | Up   | -0.3  | 0.95 |      | 0.4   | 0.86 |      | Expressed protein                                                        |      |
| Pc_TC040930 | 1.76  | 0.01  | Up   | 0.87  | 0.31 |      | -1.01 | 0.44 |      | 2.46  | 0    | Up   | Expressed protein                                                        |      |
| Pc_TC040931 | 3.54  | 0.01  | Up   | 0     | 0.67 |      | 3.55  | 0.05 |      | 1.8   | 0.42 |      | isovaleryl-CoA-dehydrogenase                                             |      |
| Pc_TC040932 | 2.86  | 0     | Up   | 0     | 0.15 |      | 2.12  | 0.15 |      | 1.99  | 0.09 |      | isovaleryl-CoA-dehydrogenase                                             |      |
| Pc_TC040938 | -0.77 | 0.03  |      | -1.06 | 0.02 | Down | 1.15  | 0.17 |      | 0.62  | 0.23 |      | Homeodomain-like transcriptional regulator                               |      |
| Pc_TC040947 | 0.72  | 0.33  |      | 2.37  | 0    | Up   | 0.49  | 0.69 |      | -0.21 | 0.84 |      | Ribosomal protein S10p/S20e family protein                               |      |
| Pc_TC040982 | 0.76  | 0.71  |      | 0.74  | 0.74 |      | 3.23  | 0.03 | Up   | 2.21  | 0.09 |      | Expressed protein                                                        |      |
| Pc_TC040985 | 2.61  | 0.02  | Up   | 0.32  | 0.97 |      | 0.5   | 0.87 |      | 1.83  | 0.19 |      | Expressed protein                                                        |      |
| Pc_TC040994 | -0.32 | 0.56  |      | -0.61 | 0.35 |      | 1.72  | 0.07 |      | 1.26  | 0.04 | Up   | FKBP-like peptidyl-prolyl cis-trans isomerase family protein             |      |
| Pc_TC040996 | 0.58  | 0.29  |      | 1.2   | 0.05 |      | -2.45 | 0.03 | Down | -0.81 | 0.27 |      | Expressed protein                                                        |      |
| Pc_TC041003 | -3.17 | 0.04  | Down | -0.73 | 0.58 |      | -1.74 | 0.28 |      | -4.62 | 0.01 | Down | Expressed protein                                                        |      |
| Pc_TC041004 | -0.63 | 0.25  |      | -1.59 | 0.02 | Down | 1.12  | 0.25 |      | -0.39 | 0.56 |      | Expressed protein                                                        |      |
| Pc_TC041005 | 2.17  | 0.11  |      | 2.76  | 0.04 | Up   | 1.59  | 0.41 |      | 1.53  | 0.35 |      | Expressed protein                                                        |      |
| Pc_TC041009 | 2.95  | 0.03  | Up   | 2.17  | 0.21 |      | -0.08 | 1    |      | 0     | 0.35 |      | Expressed protein                                                        |      |
| Pc_TC041028 | 2.4   | 0.03  | Up   | 0     | 0.2  |      | 1.09  | 0.56 |      | -0.64 | 0.81 |      | Protein kinase superfamily protein                                       |      |
| Pc_TC041048 | 2.37  | 0.01  | Up   | 0     | 0.09 |      | 2.19  | 0.12 |      | 0.46  | 0.79 |      | Expressed protein                                                        |      |
| Pc_TC041055 | 1.17  | 0.21  |      | 2.57  | 0    | Up   | -1.04 | 0.53 |      | 1.3   | 0.2  |      | Expressed protein                                                        |      |
| Pc_TC041057 | 2.55  | 0.01  | Up   | 0     | 0.09 |      | 2.24  | 0.11 |      | 0.26  | 0.92 |      | Expressed protein                                                        |      |
| Pc_TC041070 | 0.79  | 0.13  |      | 0.44  | 0.5  |      | 0.53  | 0.61 |      | 1.38  | 0.03 | Up   | Uncharacterized protein                                                  |      |
| Pc_TC041091 | -3.62 | 0.06  |      | 0     | 0.03 |      | 2.89  | 0.02 | Up   | 1.65  | 0.11 |      | Expressed protein                                                        |      |
| Pc_TC041094 | 0.89  | 0.43  |      | 2.2   | 0.03 | Up   | 0.73  | 0.65 |      | -0.05 | 1    |      | Expressed protein                                                        |      |
| Pc_TC041146 | 0.39  | 0.41  |      | 0.5   | 0.38 |      | -3.18 | 0    | Down | -1.43 | 0.03 | Down | Expressed protein                                                        |      |
| Pc_TC041155 | 2.68  | 0     | Up   | 0     | 0.03 |      | 3.36  | 0.01 | Up   | 0.73  | 0.54 |      | Proline-rich extensin-like family protein                                |      |
| Pc_TC041169 | 2.3   | 0.02  | Up   | 0     | 0.09 |      | 2.09  | 0.14 |      | 0.26  | 0.92 |      | Lactate/malate dehydrogenase family protein                              |      |
| Pc_TC041179 | -0.77 | 0.36  |      | 0.29  | 0.75 |      | -1.99 | 0.13 |      | -2.41 | 0.02 | Down | Expressed protein                                                        |      |
| Pc_TC041182 | 0.86  | 0.41  |      | 2.11  | 0.03 | Up   | -0.84 | 0.63 |      | -0.48 | 0.75 |      | Expressed protein                                                        |      |
| Pc_TC041234 | -1.14 | 0.42  |      | -3.75 | 0.07 |      | 2.6   | 0.04 | Up   | 0.68  | 0.57 |      | Expressed protein                                                        |      |
| Pc_TC041235 | 3.25  | 0.03  | Up   | 0     | 0.67 |      | 1.5   | 0.6  |      | 0     | 0.54 |      | COP9-signalosome 5B                                                      |      |
| Pc_TC041264 | -2.17 | 0.11  |      | -3.19 | 0.05 |      | 0.81  | 0.55 |      | -3.62 | 0.02 | Down | Expressed protein                                                        |      |
| Pc_TC041285 | 0.08  | 1     |      | 1.64  | 0.53 |      | 4.06  | 0.02 | Up   | 3.63  | 0.01 | Up   | Expressed protein                                                        |      |
| Pc_TC041307 | 4.21  | 0     | Up   | 0     | 0.67 |      | 2.41  | 0.27 |      | 2.08  | 0.3  |      | Expressed protein                                                        |      |
| Pc_TC041320 | 1.65  | 0.03  | Up   | 0     | 0    |      | 1.87  | 0.11 |      | 1.23  | 0.16 |      | Expressed protein                                                        |      |
| Pc_TC041330 | 1.73  | 0.03  | Up   | 0     | 0    |      | 1.54  | 0.21 |      | 0.12  | 0.95 |      | xylem bark cysteine peptidase 3                                          |      |
| Pc_TC041331 | 0.43  | 0.48  |      | 0.64  | 0.36 |      | -2.44 | 0.04 | Down | -1.29 | 0.1  |      | Expressed protein                                                        |      |
| Pc_TC041378 | -0.75 | 0.57  |      | 2.04  | 0.03 | Up   | -1.17 | 0.48 |      | -2.05 | 0.15 |      | Ribosomal protein S3Ae                                                   | VARL |
| Pc_TC041380 | 0.73  | 0.32  |      | -0.15 | 0.89 |      | 0.04  | 0.99 |      | -3.25 | 0    | Down | P-loop containing nucleoside triphosphate hydrolases superfamily protein |      |
| Pc_TC041389 | 0.92  | 0.31  |      | 1.2   | 0.23 |      | -3.74 | 0.05 | Down | -1.45 | 0.25 |      | Expressed protein                                                        |      |
| Pc_TC041453 | 0.58  | 0.2   |      | 0.61  | 0.27 |      | -2.29 | 0.03 | Down | -1.65 | 0.01 | Down | Expressed protein                                                        |      |

|             |       |       |      |       |           |      |       |      |      |       |       |      |                                                                              |
|-------------|-------|-------|------|-------|-----------|------|-------|------|------|-------|-------|------|------------------------------------------------------------------------------|
| Pc_TC041463 | 2.56  | 0.03  | Up   | 0     | 0.27      |      | 2.04  | 0.22 |      | 0.76  | 0.7   |      | Expressed protein                                                            |
| Pc_TC041478 | 4.03  | 0     | Up   | 0     | 0.67      |      | 2.5   | 0.25 |      | 1.63  | 0.49  |      | Expressed protein                                                            |
| Pc_TC041492 | 2.45  | 0     | Up   | 0     | 0         |      | 2.27  | 0.05 |      | 0.72  | 0.44  |      | Expressed protein                                                            |
| Pc_TC041496 | 0.66  | 0.38  |      | 1.62  | 0.04      | Up   | -1.5  | 0.26 |      | 0     | 1     |      | Expressed protein                                                            |
| Pc_TC041498 | -0.16 | 0.97  |      | -0.83 | 0.61      |      | -1.88 | 0.31 |      | -4.08 | 0.04  | Down | gag protein                                                                  |
| Pc_TC041499 | 3.44  | 0     | Up   | 0     | 0.36      |      | 2.36  | 0.16 |      | 0.8   | 0.73  |      | Expressed protein                                                            |
| Pc_TC041553 | 0.72  | 0.48  |      | 1.52  | 0.13      |      | 2.49  | 0.04 | Up   | 1.38  | 0.16  |      | Expressed protein                                                            |
| Pc_TC041582 | -2.51 | 0.35  |      | 2.47  | 0.04      | Up   | -2.08 | 0.43 |      | -0.96 | 0.68  |      | Expressed protein                                                            |
| Pc_TC041590 | -3.09 | 0.04  | Down | 1.31  | 0.19      |      | 1.6   | 0.21 |      | 0.46  | 0.7   |      | 2-succinyl-5-enolpyruvyl-6-hydroxy-3-cyclohexene-1-carboxylic-acid synthases |
| Pc_TC041663 | 1.03  | 0.29  |      | 2.66  | 0         | Up   | -2.08 | 0.24 |      | 1.14  | 0.27  |      | Uncharacterized protein (Fragment)                                           |
| Pc_TC041691 | 0.87  | 0.27  |      | 1.06  | 0.23      |      | -4.4  | 0.01 | Down | -0.07 | 0.98  |      | RING/U-box superfamily protein                                               |
| Pc_TC041696 | -1.5  | 0.01  | Down | -0.86 | 0.2       |      | 0.85  | 0.39 |      | 0.41  | 0.54  |      | Expressed protein                                                            |
| Pc_TC041697 | 0.45  | 0.54  |      | 0.34  | 0.7       |      | 2.2   | 0.04 | Up   | 1.3   | 0.09  |      | Expressed protein                                                            |
| Pc_TC041735 | 2.51  | 0.03  | Up   | 1.2   | 0.49      |      | 0.18  | 1    |      | -1.7  | 0.52  |      | Expressed protein                                                            |
| Pc_TC041772 | -2.51 | 0.05  | Down | -1.2  | 0.32      |      | 0.13  | 0.95 |      | -0.87 | 0.44  |      | Expressed protein                                                            |
| Pc_TC041776 | 3.08  | 0.05  | Up   | 2.52  | 0.2       |      | -1.5  | 0.85 |      | 0     | 0.54  |      | Expressed protein                                                            |
| Pc_TC041780 | 2.46  | 0.04  | Up   | 0     | 0.27      |      | -0.23 | 1    |      | -2.7  | 0.34  |      | plant intracellular ras group-related LRR 9                                  |
| Pc_TC041781 | 5.52  | ##### | Up   | 0     | 0.27      |      | 2.7   | 0.08 |      | 0.47  | 0.87  |      | Expressed protein                                                            |
| Pc_TC041790 | 0.25  | 0.62  |      | 0.18  | 0.78      |      | -3.16 | 0.01 | Down | -1.78 | 0.01  | Down | Expressed protein                                                            |
| Pc_TC041799 | 0     | ##### |      | -3.75 | 0         | Down | 0     | 0    |      | -4.18 | 0     | Down | Expressed protein                                                            |
| Pc_TC041803 | -1.81 | 0.11  |      | -1.32 | 0.27      |      | -2.03 | 0.18 |      | -2.75 | 0.03  | Down | Putative uncharacterized protein                                             |
| Pc_TC041809 | 2.45  | 0.02  | Up   | 0     | 0.2       |      | 1.5   | 0.37 |      | 0.36  | 0.91  |      | Expressed protein                                                            |
| Pc_TC041814 | -0.67 | 0.42  |      | 0.67  | 0.42      |      | -2.73 | 0.05 | Down | -1.68 | 0.08  |      | Uncharacterized protein                                                      |
| Pc_TC041835 | 1.59  | 0.18  |      | 2.34  | 0.05      | Up   | 0     | 0.11 |      | -1.18 | 0.57  |      | Expressed protein                                                            |
| Pc_TC041853 | -3.73 | 0.05  | Down | -0.75 | 0.63      |      | -1.5  | 0.39 |      | -1.01 | 0.47  |      | Expressed protein                                                            |
| Pc_TC041868 | -2.68 | 0.03  | Down | -0.79 | 0.49      |      | -0.21 | 0.9  |      | 0.49  | 0.62  |      | Expressed protein                                                            |
| Pc_TC041880 | 2.04  | 0.03  | Up   | 1.13  | 0.37      |      | -0.12 | 1    |      | -0.53 | 0.77  |      | Uncharacterized protein                                                      |
| Pc_TC041900 | -3.73 | 0.05  | Down | -1.75 | 0.28      |      | -1.72 | 0.33 |      | -0.6  | 0.68  |      | Expressed protein                                                            |
| Pc_TC041949 | 3.17  | 0.04  | Up   | 2.23  | 0.29      |      | 1.83  | 0.47 |      | -1.37 | 0.88  |      | Expressed protein                                                            |
| Pc_TC041962 | -1.01 | 0.09  |      | -1.67 | 0.02      | Down | 0.8   | 0.43 |      | -0.13 | 0.86  |      | Expressed protein                                                            |
| Pc_TC041963 | -0.86 | 0.07  |      | -1.46 | 0.02      | Down | 1.34  | 0.14 |      | 0.51  | 0.39  |      | Expressed protein                                                            |
| Pc_TC041974 | 0.19  | 0.63  |      | 0.77  | 0.11      |      | -2.19 | 0.03 | Down | -0.94 | 0.11  |      | Expressed protein                                                            |
| Pc_TC042012 | 1.66  | 0.03  | Up   | 1.21  | 0.2       |      | 0.3   | 0.84 |      | 0.63  | 0.53  |      | Expressed protein                                                            |
| Pc_TC042020 | -0.01 | 1     |      | 2.22  | 0.02      | Up   | 0     | 0.01 |      | -4.46 | 0.01  | Down | Expressed protein                                                            |
| Pc_TC042060 | -0.62 | 0.51  |      | -3.03 | 0.02      | Down | -0.34 | 0.81 |      | -0.18 | 0.88  |      | Histone superfamily protein                                                  |
| Pc_TC042080 | -0.3  | 0.88  |      | 2.14  | 0.03      | Up   | 0.89  | 0.55 |      | -0.27 | 0.89  |      | Expressed protein                                                            |
| Pc_TC042107 | 3.71  | ##### | Up   | 0     | 6.30E-005 |      | 3.11  | 0    | Up   | 2.01  | 0.01  | Up   | Putative ubiquitin-binding protein                                           |
| Pc_TC042118 | 0.72  | 0.48  |      | 1.94  | 0.04      | Up   | -0.8  | 0.63 |      | -0.05 | 1     |      | Expressed protein                                                            |
| Pc_TC042121 | -0.33 | 0.67  |      | 0.95  | 0.21      |      | -1.67 | 0.18 |      | -2.14 | 0.02  | Down | Expressed protein                                                            |
| Pc_TC042132 | 0.63  | 0.45  |      | 0.82  | 0.37      |      | -2.23 | 0.13 |      | -2.28 | 0.05  | Down | Peritrophin-15                                                               |
| Pc_TC042143 | 3.08  | 0     | Up   | 0     | 0.2       |      | 2.65  | 0.07 |      | 0.85  | 0.61  |      | Putative uncharacterized protein OJ1115 D04.1                                |
| Pc_TC042158 | 1.19  | 0.25  |      | 2.15  | 0.03      | Up   | 0     | 0.03 |      | -2.96 | 0.1   |      | Expressed protein                                                            |
| Pc_TC042160 | -1.71 | 0.06  |      | -2.11 | 0.05      | Down | -0.9  | 0.48 |      | -1.7  | 0.08  |      | Expressed protein                                                            |
| Pc_TC042166 | 1.08  | 0.25  |      | 1.96  | 0.04      | Up   | -1.17 | 0.48 |      | 1.08  | 0.29  |      | Expressed protein                                                            |
| Pc_TC042185 | -7.82 | ##### | Down | -5.99 | 5.12E-018 | Down | -0.74 | 0.41 |      | -3.35 | ##### | Down | cysteine-rich RLK (RECEPTOR-like protein kinase) 8                           |
| Pc_TC042192 | -0.46 | 0.51  |      | -1.8  | 0.04      | Down | 0.3   | 0.79 |      | -0.36 | 0.65  |      | Expressed protein                                                            |
| Pc_TC042194 | 2.04  | 0.03  | Up   | 0     | 0.07      |      | 1.96  | 0.16 |      | 1.21  | 0.31  |      | Expressed protein                                                            |
| Pc_TC042216 | -1.62 | 0.03  | Down | -1.7  | 0.05      |      | 1.69  | 0.11 |      | 1.09  | 0.13  |      | Expressed protein                                                            |
| Pc_TC042219 | -3.92 | 0.03  | Down | -1.94 | 0.21      |      | -4.5  | 0.04 | Down | 0     | 0.01  |      | Zinc-binding ribosomal protein family protein                                |
| Pc_TC042239 | 0.08  | 0.97  |      | 0.98  | 0.28      |      | -3.35 | 0.04 | Down | -1.65 | 0.14  |      | Expressed protein                                                            |
| Pc_TC042246 | -2.14 | 0.06  |      | -4.75 | 0.01      | Down | 2.13  | 0.07 |      | 1.07  | 0.23  |      | Expressed protein                                                            |
| Pc_TC042249 | 1.33  | 0.03  | Up   | 1.5   | 0.04      | Up   | 0.61  | 0.59 |      | 1.17  | 0.12  |      | Uncharacterized protein (Fragment)                                           |
| Pc_TC042280 | 3.78  | 0.01  | Up   | 0     | 0.67      |      | 2.09  | 0.38 |      | 0.63  | 0.96  |      | Expressed protein                                                            |
| Pc_TC042281 | 2.29  | 0     | Up   | 0     | 0.02      |      | 1.96  | 0.12 |      | -0.37 | 0.8   |      | eukaryotic translation initiation factor 3K                                  |
| Pc_TC042284 | 0.4   | 0.45  |      | 0.45  | 0.49      |      | -3    | 0.01 | Down | -1.18 | 0.1   |      | Expressed protein                                                            |
| Pc_TC042321 | 2.99  | 0.01  | Up   | 0     | 0.36      |      | 3.03  | 0.06 |      | 1.43  | 0.39  |      | Expressed protein                                                            |
| Pc_TC042333 | 0.54  | 0.63  |      | 1.06  | 0.32      |      | -2.91 | 0.12 |      | -3.37 | 0.04  | Down | Uncharacterized protein                                                      |
| Pc_TC042348 | 0.48  | 0.21  |      | 0.26  | 0.59      |      | -2.17 | 0.02 | Down | -0.85 | 0.13  |      | Expressed protein                                                            |
| Pc_TC042349 | -0.04 | 1     |      | -0.06 | 1         |      | -3.2  | 0.05 |      | -2.49 | 0.04  | Down | Expressed protein                                                            |
| Pc_TC042422 | -4.51 | 0.01  | Down | -4.53 | 0.01      | Down | -1.08 | 0.46 |      | 0     | 0     |      | Expressed protein                                                            |
| Pc_TC042427 | -0.09 | 0.81  |      | -1.2  | 0.02      | Down | -0.32 | 0.72 |      | -0.32 | 0.56  |      | Expressed protein                                                            |
| Pc_TC042463 | 0.28  | 0.86  |      | 0.75  | 0.55      |      | 0     | 0.03 |      | -4.08 | 0.04  | Down | Expressed protein                                                            |



|             |       |       |      |       |           |      |       |      |      |       |       |      |                                            |
|-------------|-------|-------|------|-------|-----------|------|-------|------|------|-------|-------|------|--------------------------------------------|
| Pc_TC042476 | -2.45 | 0.01  | Down | -0.94 | 0.33      |      | -4.02 | 0.01 | Down | -2.9  | 0.01  | Down | Expressed protein                          |
| Pc_TC042495 | 2.53  | 0     | Up   | 0     | 0.02      |      | 2.34  | 0.06 |      | 1.27  | 0.21  |      | Expressed protein                          |
| Pc_TC042501 | 3.94  | 0     | Up   | 0     | 0.67      |      | 2.59  | 0.22 |      | 0.63  | 0.96  |      | nuclear transport factor 2A                |
| Pc_TC042509 | 2.25  | 0.05  | Up   | 1.56  | 0.27      |      | -2.08 | 0.43 |      | 0.04  | 1     |      | Expressed protein                          |
| Pc_TC042510 | 0.23  | 0.5   |      | -0.5  | 0.27      |      | 1.26  | 0.14 |      | 1.37  | 0.01  | Up   | Expressed protein                          |
| Pc_TC042511 | 1.75  | 0     | Up   | 0     | 1.56E-007 |      | 1.65  | 0.11 |      | 0.08  | 0.93  |      | 60S ribosomal protein L18A-1               |
| Pc_TC042519 | -0.92 | 0.73  |      | -1.53 | 0.58      |      | 3.03  | 0.04 | Up   | 1.36  | 0.33  |      | Expressed protein                          |
| Pc_TC042552 | 1.32  | 0.21  |      | 2.09  | 0.05      | Up   | -1.15 | 0.55 |      | 0.17  | 0.96  |      | Expressed protein                          |
| Pc_TC042561 | -0.69 | 0.59  |      | 0.43  | 0.74      |      | -3.58 | 0.07 |      | -4.46 | 0.01  | Down | Expressed protein                          |
| Pc_TC042567 | 0.78  | 0.59  |      | 2.34  | 0.04      | Up   | 1.75  | 0.24 |      | 1.27  | 0.32  |      | Expressed protein                          |
| Pc_TC042608 | 0.7   | 0.52  |      | 1.32  | 0.21      |      | -4.4  | 0.05 | Down | -1.47 | 0.29  |      | Expressed protein                          |
| Pc_TC042615 | 0.25  | 0.95  |      | 1.06  | 0.46      |      | 2.93  | 0.03 | Up   | 1.98  | 0.08  |      | Putative uncharacterized protein           |
| Pc_TC042627 | 0.6   | 0.46  |      | 0.55  | 0.56      |      | -2.91 | 0.06 |      | -3.05 | 0.01  | Down | Expressed protein                          |
| Pc_TC042628 | 3.17  | 0.04  | Up   | 2.76  | 0.13      |      | -1.5  | 0.85 |      | 0     | 0.54  |      | Expressed protein                          |
| Pc_TC042636 | 1.95  | 0.01  | Up   | 0     | 0         |      | 1.32  | 0.29 |      | 0.31  | 0.79  |      | Expressed protein                          |
| Pc_TC042670 | -0.2  | 0.89  |      | 1.42  | 0.12      |      | -5.02 | 0.01 | Down | -4.9  | 0     | Down | Expressed protein                          |
| Pc_TC042671 | 1.82  | 0.14  |      | 3.15  | 0         | Up   | 1.01  | 0.6  |      | 0.04  | 1     |      | Ribosomal protein S10p/S20e family protein |
| Pc_TC042688 | -0.01 | 1     |      | 0.49  | 0.6       |      | -3.58 | 0.02 | Down | -3.46 | 0.01  | Down | Expressed protein                          |
| Pc_TC042712 | 3.54  | 0.08  |      | 3.96  | 0.05      | Up   | 2.83  | 0.32 |      | 1.21  | 0.89  |      | Glutathione S-transferase family protein   |
| Pc_TC042740 | 3.47  | 0.02  | Up   | 0     | 0.67      |      | 2.41  | 0.27 |      | 2.21  | 0.26  |      | Expressed protein                          |
| Pc_TC042742 | -0.24 | 0.87  |      | -0.18 | 0.93      |      | -3.82 | 0.04 | Down | -2.11 | 0.11  |      | Expressed protein                          |
| Pc_TC042763 | 0.27  | 0.55  |      | 0.36  | 0.51      |      | -2.95 | 0.01 | Down | -0.9  | 0.15  |      | Expressed protein                          |
| Pc_TC042768 | 2.51  | 0.03  | Up   | 1.06  | 0.56      |      | 1.18  | 0.54 |      | 3.73  | 0     | Up   | Expressed protein                          |
| Pc_TC042773 | -3.24 | 0.03  | Down | -0.68 | 0.6       |      | -1.82 | 0.25 |      | -1.11 | 0.36  |      | Expressed protein                          |
| Pc_TC042787 | -0.18 | 0.88  |      | 1.41  | 0.1       |      | 0     | 0    |      | -2.33 | 0.04  | Down | Expressed protein                          |
| Pc_TC042795 | -0.13 | 0.98  |      | 0.15  | 0.96      |      | 3.1   | 0.01 | Up   | 1     | 0.35  |      | Expressed protein                          |
| Pc_TC042797 | 0.15  | 0.88  |      | 0.4   | 0.67      |      | -3.71 | 0.02 | Down | -1.5  | 0.14  |      | Expressed protein                          |
| Pc_TC042799 | 0.82  | 0.79  |      | 0.06  | 1         |      | 3.73  | 0.02 | Up   | 3.04  | 0.03  | Up   | Retrovirus-related Pol polyprotein LINE-1  |
| Pc_TC042802 | -1.89 | 0     | Down | -6.08 | 8.34E-008 | Down | -1.51 | 0.17 |      | -3.61 | ##### | Down | Expressed protein                          |
| Pc_TC042813 | 1.67  | 0.01  | Up   | 0.27  | 0.76      |      | 1.01  | 0.37 |      | 0.27  | 0.76  |      | Expressed protein                          |
| Pc_TC042827 | -0.51 | 0.67  |      | 0.62  | 0.56      |      | -3.89 | 0.04 | Down | -1.77 | 0.16  |      | Os01g0947400 protein                       |
| Pc_TC042853 | 0.35  | 0.33  |      | 0.51  | 0.26      |      | -3.31 | 0    | Down | -1.45 | 0.01  | Down | Expressed protein                          |
| Pc_TC042858 | 2.63  | 0.01  | Up   | 0     | 0.15      |      | 2.02  | 0.18 |      | -0.6  | 0.8   |      | Expressed protein                          |
| Pc_TC042859 | 0.37  | 0.85  |      | -0.11 | 1         |      | 2.76  | 0.04 | Up   | 1.95  | 0.08  |      | Expressed protein                          |
| Pc_TC042865 | 3.08  | 0.05  | Up   | 2.76  | 0.13      |      | 0.09  | 1    |      | 0.63  | 0.96  |      | Uncharacterized protein                    |
| Pc_TC042896 | -0.08 | 0.88  |      | 0.51  | 0.4       |      | -3.21 | 0.01 | Down | -1.58 | 0.03  | Down | Expressed protein                          |
| Pc_TC042915 | 0     | 1     |      | 4.06  | 0.04      | Up   | 0     | 0.87 |      | 0     | 0.9   |      | Expressed protein                          |
| Pc_TC042917 | 0.82  | 0.39  |      | 1.28  | 0.2       |      | -1.67 | 0.3  |      | -3.54 | 0.03  | Down | Expressed protein                          |
| Pc_TC042944 | -0.54 | 0.36  |      | -0.47 | 0.5       |      | -2.29 | 0.04 | Down | -2.03 | 0.01  | Down | general regulatory factor 9                |
| Pc_TC042946 | -4.38 | 0.01  | Down | -2.4  | 0.09      |      | -0.96 | 0.52 |      | -4.83 | 0     | Down | Os09g0421500 protein                       |
| Pc_TC042974 | -0.81 | 0.58  |      | -1.64 | 0.33      |      | -1.39 | 0.44 |      | -4.08 | 0.04  | Down | Expressed protein                          |
| Pc_TC043044 | 0.57  | 0.23  |      | 0.87  | 0.13      |      | -3.43 | 0    | Down | -0.85 | 0.2   |      | Putative retroelement                      |
| Pc_TC043053 | 1.16  | 0.14  |      | 2.09  | 0.01      | Up   | -2.61 | 0.1  |      | -0.83 | 0.45  |      | Expressed protein                          |
| Pc_TC043069 | 3.02  | 0     | Up   | 0     | 0.2       |      | 2.13  | 0.17 |      | 0.85  | 0.61  |      | Dihydroliipoamide succinyltransferase      |
| Pc_TC043104 | -2.13 | 0.03  | Down | -1.83 | 0.1       |      | -0.15 | 0.92 |      | 0.06  | 0.98  |      | receptor lectin kinase                     |
| Pc_TC043110 | 3.34  | ##### | Up   | 0     | 0.07      |      | 2.61  | 0.05 |      | 1.83  | 0.09  |      | NADH dehydrogenase subunit 9               |
| Pc_TC043112 | 1.25  | 0.31  |      | 0.38  | 0.87      |      | 2.96  | 0.03 | Up   | 2.21  | 0.05  | Up   | unknown protein                            |
| Pc_TC043132 | 0.4   | 0.96  |      | 0.38  | 0.97      |      | 2.5   | 0.13 |      | 2.63  | 0.05  | Up   | Expressed protein                          |
| Pc_TC043141 | 2.99  | 0.06  |      | 0     | 0.67      |      | 3.59  | 0.05 | Up   | 1.95  | 0.36  |      | Expressed protein                          |
| Pc_TC043143 | -0.92 | 0.27  |      | 0.09  | 0.94      |      | -3.02 | 0.03 | Down | -1.99 | 0.05  | Down | Expressed protein                          |
| Pc_TC043148 | -0.11 | 0.88  |      | -0.74 | 0.33      |      | -3.55 | 0.01 | Down | -1.22 | 0.12  |      | Expressed protein                          |
| Pc_TC043208 | 2.32  | 0     | Up   | 0     | 0.01      |      | 2.23  | 0.07 |      | 0.98  | 0.33  |      | Expressed protein                          |
| Pc_TC043238 | -3.17 | 0.04  | Down | 0     | 0.01      |      | -3.74 | 0.05 | Down | 0     | 0     |      | Ribosomal protein S8e family protein       |
| Pc_TC043244 | 1.92  | 0     | Up   | 0     | 6.30E-005 |      | 2.11  | 0.06 |      | 3.25  | ##### | Up   | biotin F                                   |
| Pc_TC043252 | -1.42 | 0.07  |      | 1.14  | 0.12      |      | -4.93 | 0    | Down | -1.23 | 0.16  |      | Expressed protein                          |
| Pc_TC043264 | 0.28  | 0.69  |      | 1.38  | 0.05      |      | -3.39 | 0.01 | Down | -3.63 | 0     | Down | Expressed protein                          |
| Pc_TC043267 | 1.19  | 0.4   |      | 2.68  | 0.02      | Up   | 0     | 0.14 |      | 0     | 0.11  |      | Expressed protein                          |
| Pc_TC043291 | -0.36 | 0.54  |      | -1.74 | 0.02      | Down | 0.63  | 0.54 |      | 0.51  | 0.45  |      | Expressed protein                          |
| Pc_TC043314 | 0.08  | 1     |      | 0     | 0.67      |      | 5.23  | 0    | Up   | 3.02  | 0.07  |      | Expressed protein                          |
| Pc_TC043316 | -0.54 | 0.65  |      | 0.49  | 0.67      |      | -4.82 | 0.02 | Down | -1.37 | 0.27  |      | Expressed protein                          |
| Pc_TC043320 | 1.36  | 0.09  |      | 0.66  | 0.52      |      | -4.02 | 0.03 | Down | -2.09 | 0.09  |      | Expressed protein                          |
| Pc_TC043327 | -1.16 | 0.23  |      | -2.66 | 0.03      | Down | 0.46  | 0.72 |      | -0.78 | 0.45  |      | Expressed protein                          |

|             |       |       |      |       |           |      |  |       |      |      |       |      |      |                                                                          |
|-------------|-------|-------|------|-------|-----------|------|--|-------|------|------|-------|------|------|--------------------------------------------------------------------------|
| Pc_TC043341 | 3.54  | 0     | Up   | 0     | 0.36      |      |  | 3.12  | 0.05 | Up   | 0.95  | 0.64 |      | Expressed protein                                                        |
| Pc_TC043349 | 0.66  | 0.58  |      | 1.9   | 0.07      |      |  | -0.62 | 0.74 |      | 2.06  | 0.04 | Up   | Expressed protein                                                        |
| Pc_TC043363 | 0.44  | 0.84  |      | -1.75 | 0.48      |      |  | 0.78  | 0.68 |      | 2.7   | 0.01 | Up   | Expressed protein                                                        |
| Pc_TC043379 | 0.86  | 0.57  |      | 2.46  | 0.03      | Up   |  | 0     | 0.11 |      | 0.14  | 1    |      | Expressed protein                                                        |
| Pc_TC043381 | 0.93  | 0.26  |      | 1.72  | 0.05      | Up   |  | 0     | 0    |      | -4.02 | 0.01 | Down | Expressed protein                                                        |
| Pc_TC043382 | -0.34 | 0.52  |      | 0.12  | 0.85      |      |  | -2.77 | 0.01 | Down | -0.61 | 0.37 |      | Expressed protein                                                        |
| Pc_TC043383 | 2.4   | 0.04  | Up   | 3.35  | 0         | Up   |  | 3.43  | 0.02 | Up   | 2.86  | 0.02 | Up   | Expressed protein                                                        |
| Pc_TC043405 | 2.69  | 0     | Up   | 0     | 0.11      |      |  | 1.55  | 0.31 |      | 0.63  | 0.69 |      | Expressed protein                                                        |
| Pc_TC043407 | 3.54  | 0.01  | Up   | 0     | 0.67      |      |  | 2.09  | 0.38 |      | 1.63  | 0.49 |      | Expressed protein                                                        |
| Pc_TC043463 | 0.25  | 0.82  |      | 1.23  | 0.18      |      |  | 3.2   | 0.01 | Up   | 2.01  | 0.02 | Up   | NB-ARC domain-containing disease resistance protein                      |
| Pc_TC043465 | 0.14  | 0.8   |      | -2.4  | 0         | Down |  | 0.57  | 0.57 |      | 0.2   | 0.77 |      | NB-ARC domain-containing disease resistance protein                      |
| Pc_TC043476 | 3.66  | 0.01  | Up   | 1.38  | 0.65      |      |  | 1.67  | 0.53 |      | 1.95  | 0.36 |      | Expressed protein                                                        |
| Pc_TC043491 | 2.74  | 0.05  | Up   | 0     | 0.48      |      |  | 3.28  | 0.05 | Up   | 0.04  | 1    |      | Expressed protein                                                        |
| Pc_TC043501 | -1.51 | 0.16  |      | -1.24 | 0.29      |      |  | -4.25 | 0.02 | Down | -2.32 | 0.05 |      | UniRef100                                                                |
| Pc_TC043502 | -4.51 | 0.01  | Down | -2.94 | 0.04      | Down |  | -4.08 | 0.03 | Down | -4.96 | 0    | Down | Expressed protein                                                        |
| Pc_TC043549 | -2.41 | 0.04  | Down | -1.58 | 0.18      |      |  | 0.45  | 0.74 |      | 0     | 0    |      | ADP/ATP carrier 2                                                        |
| Pc_TC043559 | 1.08  | 0.51  |      | 2.74  | 0.03      | Up   |  | 0.99  | 0.63 |      | -1.11 | 0.68 |      | Expressed protein                                                        |
| Pc_TC043573 | 0.15  | 0.81  |      | 0.24  | 0.72      |      |  | -2.88 | 0.01 | Down | -2.14 | 0.01 | Down | Expressed protein                                                        |
| Pc_TC043628 | 0.69  | 0.48  |      | 1.51  | 0.11      |      |  | 2.6   | 0.03 | Up   | 2.59  | 0    | Up   | Expressed protein                                                        |
| Pc_TC043630 | -0.67 | 0.27  |      | -0.63 | 0.37      |      |  | -0.21 | 0.85 |      | -2.02 | 0.01 | Down | Expressed protein                                                        |
| Pc_TC043670 | 1.49  | 0.25  |      | 1.28  | 0.4       |      |  | -0.08 | 1    |      | 2.56  | 0.03 | Up   | Expressed protein                                                        |
| Pc_TC043692 | -2.6  | 0     | Down | -6.32 | 3.62E-006 | Down |  | -1.62 | 0.17 |      | -3.05 | 0    | Down | NADH dehydrogenase 1A                                                    |
| Pc_TC043711 | -0.37 | 0.72  |      | -2.85 | 0.03      | Down |  | 0.15  | 0.93 |      | -0.24 | 0.84 |      | Expressed protein                                                        |
| Pc_TC043721 | 2.4   | 0.03  | Up   | 0     | 0.2       |      |  | 2.38  | 0.12 |      | -0.64 | 0.81 |      | Expressed protein                                                        |
| Pc_TC043734 | -2.11 | 0.03  | Down | -1.21 | 0.23      |      |  | -0.21 | 0.88 |      | -2.73 | 0.01 | Down | Expressed protein                                                        |
| Pc_TC043735 | 1.3   | 0.35  |      | 1.8   | 0.19      |      |  | 3.11  | 0.03 | Up   | 3.58  | 0    | Up   | inner membrane protein OXA1-like                                         |
| Pc_TC043737 | 2.4   | 0.04  | Up   | -0.26 | 1         |      |  | 0.5   | 0.87 |      | 1.7   | 0.23 |      | homolog of yeast oxidase assembly 1 (OXA1)                               |
| Pc_TC043739 | -2.8  | 0.04  | Down | -0.23 | 0.88      |      |  | -2.15 | 0.17 |      | -2.03 | 0.11 |      | Putative uncharacterized protein                                         |
| Pc_TC043750 | 0.37  | 0.75  |      | 2.08  | 0.02      | Up   |  | -2.67 | 0.13 |      | -1.74 | 0.19 |      | Expressed protein                                                        |
| Pc_TC043797 | 0.38  | 0.79  |      | -0.06 | 1         |      |  | 1.48  | 0.28 |      | 2.03  | 0.04 | Up   | Expressed protein                                                        |
| Pc_TC043808 | 0.48  | 0.57  |      | 2.29  | 0         | Up   |  | -0.54 | 0.69 |      | 0.31  | 0.76 |      | Expressed protein                                                        |
| Pc_TC043811 | 2.66  | 0.31  |      | 3.87  | 0.06      |      |  | 4.79  | 0.02 | Up   | 3.08  | 0.18 |      | Expressed protein                                                        |
| Pc_TC043827 | 0.84  | 0.49  |      | 1.74  | 0.12      |      |  | 1.83  | 0.19 |      | 2.21  | 0.03 | Up   | Expressed protein                                                        |
| Pc_TC043856 | 0.95  | 0.38  |      | 2.76  | 0         | Up   |  | 0.17  | 0.96 |      | 1.25  | 0.26 |      | Expressed protein                                                        |
| Pc_TC043857 | 0     | 1     |      | 0.54  | 0.34      |      |  | -2.35 | 0.03 | Down | -1.65 | 0.01 | Down | Expressed protein                                                        |
| Pc_TC043885 | 0.34  | 0.76  |      | 1.09  | 0.27      |      |  | -2.01 | 0.21 |      | -3.7  | 0.02 | Down | Expressed protein                                                        |
| Pc_TC043903 | -2.88 | 0.01  | Down | -2.57 | 0.04      | Down |  | 0.04  | 1    |      | -0.2  | 0.87 |      | Expressed protein                                                        |
| Pc_TC043923 | 3.25  | 0.03  | Up   | 0     | 0.67      |      |  | 1.31  | 0.68 |      | -0.37 | 1    |      | Expressed protein                                                        |
| Pc_TC043940 | 1.87  | 0.03  | Up   | 0     | 0.02      |      |  | 2.57  | 0.04 | Up   | 0.53  | 0.67 |      | Expressed protein                                                        |
| Pc_TC043945 | 0.86  | 0.41  |      | 1.34  | 0.21      |      |  | 1.34  | 0.33 |      | 2.1   | 0.03 | Up   | Expressed protein                                                        |
| Pc_TC043950 | -4.68 | ##### | Down | -1.61 | 0.09      |      |  | -2.79 | 0.04 | Down | -3.54 | 0    | Down | Aldolase superfamily protein                                             |
| Pc_TC043955 | -0.07 | 1     |      | 2.16  | 0.04      | Up   |  | -1.23 | 0.53 |      | -2.7  | 0.15 |      | Expressed protein                                                        |
| Pc_TC043991 | 2.66  | 0     | Up   | 0     | 0.07      |      |  | 2.11  | 0.12 |      | 0.11  | 1    |      | Serine protease inhibitor (SERPIN) family protein                        |
| Pc_TC044005 | 0.1   | 0.91  |      | 0.35  | 0.66      |      |  | 1.31  | 0.22 |      | 1.96  | 0.01 | Up   | Expressed protein                                                        |
| Pc_TC044020 | 0.49  | 0.83  |      | 2.8   | 0.02      | Up   |  | 0     | 0.14 |      | -0.96 | 0.68 |      | Expressed protein                                                        |
| Pc_TC044023 | 2.6   | 0.01  | Up   | 0     | 0.11      |      |  | 1.59  | 0.3  |      | -1.37 | 0.47 |      | DNA-directed RNA polymerase family protein                               |
| Pc_TC044031 | -0.34 | 0.93  |      | 1.58  | 0.21      |      |  | 2.98  | 0.03 | Up   | 0.95  | 0.49 |      | Expressed protein                                                        |
| Pc_TC044050 | 1.66  | 0.72  |      | 1.06  | 0.98      |      |  | 4.9   | 0.01 | Up   | 2.8   | 0.26 |      | sulphotransferase 12                                                     |
| Pc_TC044051 | -1.09 | 0.55  |      | -2.11 | 0.33      |      |  | 3.41  | 0.01 | Up   | 1.1   | 0.38 |      | P-loop containing nucleoside triphosphate hydrolases superfamily protein |
| Pc_TC044067 | 2.95  | 0     | Up   | 0     | 0.2       |      |  | 4.05  | 0    | Up   | -0.37 | 0.93 |      | Myzus persicae-induced lipase 1                                          |
| Pc_TC044072 | 0.31  | 0.66  |      | 0.6   | 0.43      |      |  | -2.82 | 0.03 | Down | -1.01 | 0.23 |      | Putative uncharacterized protein Sb08g003420                             |
| Pc_TC044079 | 0.08  | 0.99  |      | 2.35  | 0.01      | Up   |  | -2.23 | 0.17 |      | -3.7  | 0.02 | Down | ribosomal protein S6                                                     |
| Pc_TC044089 | -1.14 | 0.01  | Down | -1.66 | 0         | Down |  | 1.27  | 0.15 |      | -1.01 | 0.09 |      | Expressed protein                                                        |
| Pc_TC044145 | -1.19 | 0.24  |      | -1.8  | 0.13      |      |  | 2.89  | 0.01 | Up   | 1.28  | 0.14 |      | Uncharacterized protein                                                  |
| Pc_TC044150 | 0.3   | 0.77  |      | 1     | 0.3       |      |  | -3.5  | 0.04 | Down | -1.5  | 0.2  |      | Expressed protein                                                        |
| Pc_TC044168 | 1.45  | 0.05  | Up   | 1.13  | 0.2       |      |  | 0.01  | 1    |      | 1.52  | 0.07 |      | Expressed protein                                                        |
| Pc_TC044172 | 2.89  | 0.03  | Up   | 0     | 0.48      |      |  | 0.92  | 0.76 |      | 0.04  | 1    |      | Expressed protein                                                        |
| Pc_TC044173 | 2.32  | 0.01  | Up   | 0     | 0.02      |      |  | 1.85  | 0.16 |      | 0.52  | 0.68 |      | acetoacetyl-CoA thiolase 2                                               |
| Pc_TC044179 | 0.52  | 0.66  |      | 0.84  | 0.48      |      |  | 0     | 0.02 |      | -4.18 | 0.03 | Down | Expressed protein                                                        |
| Pc_TC044181 | -0.07 | 0.91  |      | -0.32 | 0.64      |      |  | 1.99  | 0.04 | Up   | 1.63  | 0.01 | Up   | Expressed protein                                                        |
| Pc_TC044215 | -0.92 | 0.6   |      | 0.06  | 1         |      |  | 3.01  | 0.02 | Up   | 1.7   | 0.12 |      | Expressed protein                                                        |
| Pc_TC044216 | 2.3   | 0.13  |      | 0.47  | 0.98      |      |  | 3.62  | 0.03 | Up   | 2.63  | 0.08 |      | Expressed protein                                                        |

|             |       |       |      |  |       |      |      |       |      |      |       |      |      |                                                                          |
|-------------|-------|-------|------|--|-------|------|------|-------|------|------|-------|------|------|--------------------------------------------------------------------------|
| Pc_TC044248 | -0.58 | 0.32  |      |  | -2.38 | 0    | Down | 2.04  | 0.04 | Up   | 1.49  | 0.02 | Up   | leucine-rich repeat transmembrane protein kinase family protein          |
| Pc_TC044252 | 0.26  | 0.77  |      |  | 1.26  | 0.13 |      | -4.71 | 0.01 | Down | -3    | 0.01 | Down | Expressed protein                                                        |
| Pc_TC044253 | 3.25  | 0.14  |      |  | 4.45  | 0.01 | Up   | 0     | 0.87 |      | 0     | 0.9  |      | Expressed protein                                                        |
| Pc_TC044258 | 1.36  | 0.28  |      |  | 1.77  | 0.16 |      | 3.04  | 0.03 | Up   | 1.21  | 0.37 |      | Major facilitator superfamily protein                                    |
| Pc_TC044283 | -1.58 | 0.21  |      |  | -0.28 | 0.86 |      | -1.42 | 0.37 |      | -3.04 | 0.04 | Down | S-adenosyl-L-methionine-dependent methyltransferases superfamily protein |
| Pc_TC044296 | 2.27  | 0.03  | Up   |  | 0     | 0.15 |      | 1.22  | 0.47 |      | -2.18 | 0.32 |      | Expressed protein                                                        |
| Pc_TC044302 | 2.55  | 0.01  | Up   |  | 0     | 0.09 |      | 2.24  | 0.11 |      | 0.78  | 0.57 |      | Serine carboxypeptidase S28 family protein                               |
| Pc_TC044309 | 2.25  | 0.05  | Up   |  | 3.06  | 0.01 | Up   | 2.05  | 0.19 |      | 0.95  | 0.55 |      | protein,putative,unclassified                                            |
| Pc_TC044334 | 1.96  | 0.02  | Up   |  | 0     | 0.02 |      | 3.49  | 0    | Up   | 2.24  | 0.01 | Up   | Fatty acid desaturase family protein                                     |
| Pc_TC044353 | 2.54  | 0.01  | Up   |  | 1.76  | 0.15 |      | -0.33 | 0.92 |      | 1.8   | 0.12 |      | Expressed protein                                                        |
| Pc_TC044355 | 3.25  | ##### | Up   |  | 0     | 0.02 |      | 2.06  | 0.1  |      | -0.79 | 0.55 |      | Expressed protein                                                        |
| Pc_TC044360 | 2.66  | 0.31  |      |  | 2.06  | 0.59 |      | 6.23  | 0    | Up   | 3.87  | 0.04 | Up   | Expressed protein                                                        |
| Pc_TC044368 | 2.19  | 0.16  |      |  | 3.52  | 0.01 | Up   | 0     | 0.36 |      | -0.96 | 0.86 |      | Expressed protein                                                        |
| Pc_TC044380 | -3.92 | 0     | Down |  | -1.94 | 0.1  |      | -2.33 | 0.11 |      | -3.37 | 0.01 | Down | Expressed protein                                                        |
| Pc_TC044386 | 0.37  | 0.41  |      |  | 0.4   | 0.46 |      | 1.92  | 0.04 | Up   | 0.6   | 0.31 |      | Expressed protein                                                        |
| Pc_TC044406 | -0.73 | 0.76  |      |  | -1.16 | 0.63 |      | 2.83  | 0.04 | Up   | 1.46  | 0.26 |      | Putative uncharacterized protein                                         |
| Pc_TC044407 | 1.36  | 0.07  |      |  | 2.1   | 0.01 | Up   | 0.45  | 0.74 |      | 1.37  | 0.11 |      | Putative uncharacterized protein                                         |
| Pc_TC044428 | 1.49  | 0.44  |      |  | 1.28  | 0.58 |      | 2.96  | 0.09 |      | 2.95  | 0.04 | Up   | Expressed protein                                                        |
| Pc_TC044429 | 0     | 0.44  |      |  | 1.28  | 0.58 |      | 3.94  | 0.01 | Up   | 2.5   | 0.1  |      | Expressed protein                                                        |
| Pc_TC044454 | 1.93  | 0.03  | Up   |  | 0.88  | 0.46 |      | 1.99  | 0.13 |      | 0.78  | 0.51 |      | Tetraspanin 42Ee                                                         |
| Pc_TC044455 | 2.04  | 0.01  | Up   |  | 0     | 0.01 |      | 1.79  | 0.16 |      | -0.46 | 0.73 |      | Expressed protein                                                        |
| Pc_TC044465 | 0.24  | 0.87  |      |  | 1.92  | 0.04 | Up   | 0     | 0.01 |      | -4.46 | 0.01 | Down | Expressed protein                                                        |
| Pc_TC044475 | 0.13  | 0.85  |      |  | 0.86  | 0.2  |      | -3.62 | 0    | Down | -2.14 | 0.01 | Down | Expressed protein                                                        |
| Pc_TC044504 | 0.37  | 0.7   |      |  | 0.43  | 0.68 |      | -3.25 | 0.05 | Down | -1.32 | 0.23 |      | Expressed protein                                                        |
| Pc_TC044512 | -3.09 | 0.04  | Down |  | -2.11 | 0.16 |      | -3.67 | 0.06 |      | -4.54 | 0.01 | Down | Expressed protein                                                        |
| Pc_TC044555 | 2.54  | 0     | Up   |  | 0     | 0.04 |      | 1.8   | 0.18 |      | -0.64 | 0.68 |      | emp24/gp25L/p24 family/GOLD family protein                               |
| Pc_TC044557 | 2.19  | 0.16  |      |  | 3.52  | 0.01 | Up   | 2.38  | 0.2  |      | 2.13  | 0.19 |      | Expressed protein                                                        |
| Pc_TC044583 | -0.2  | 0.92  |      |  | 1.88  | 0.05 | Up   | -1.41 | 0.39 |      | -2.46 | 0.09 |      | Glutaredoxin family protein                                              |
| Pc_TC044603 | 3.94  | 0     | Up   |  | 0     | 0.67 |      | 2.2   | 0.34 |      | 0.95  | 0.81 |      | Expressed protein                                                        |
| Pc_TC044617 | 1.89  | 0.38  |      |  | 2.52  | 0.2  |      | 3.93  | 0.03 | Up   | 2.71  | 0.12 |      | Expressed protein                                                        |
| Pc_TC044626 | 1.46  | 0.17  |      |  | 2.35  | 0.02 | Up   | 0.27  | 0.92 |      | 0.76  | 0.56 |      | Expressed protein                                                        |
| Pc_TC044630 | 0.2   | 0.66  |      |  | 0.1   | 0.86 |      | -2.76 | 0.01 | Down | -1.18 | 0.06 |      | PIF1 helicase                                                            |
| Pc_TC044648 | 3.38  | 0     | Up   |  | 0     | 0.2  |      | 2.41  | 0.11 |      | 0.04  | 1    |      | Inducible metalloproteinase inhibitor protein                            |
| Pc_TC044649 | 4.83  | ##### | Up   |  | 0     | 0.67 |      | 4.81  | 0    | Up   | 0     | 0.54 |      | Expressed protein                                                        |
| Pc_TC044664 | -0.07 | 0.93  |      |  | 0.61  | 0.4  |      | -2.51 | 0.04 | Down | -2.06 | 0.02 | Down | Putative uncharacterized protein (Fragment)                              |
| Pc_TC044675 | 2.08  | 0.54  |      |  | 3.96  | 0.05 | Up   | 0.5   | 1    |      | 0.63  | 1    |      | Expressed protein                                                        |
| Pc_TC044687 | 2.74  | 0.05  | Up   |  | 2.47  | 0.12 |      | 1.24  | 0.62 |      | 0.36  | 1    |      | Expressed protein                                                        |
| Pc_TC044696 | 2.99  | 0.06  |      |  | 2.06  | 0.36 |      | 3.09  | 0.11 |      | 3.98  | 0    | Up   | Expressed protein                                                        |
| Pc_TC044698 | 2.51  | 0     | Up   |  | 0     | 0.03 |      | 1.5   | 0.27 |      | 1.17  | 0.28 |      | Expressed protein                                                        |
| Pc_TC044708 | -0.77 | 0.45  |      |  | -1.11 | 0.34 |      | -2.25 | 0.14 |      | -2.81 | 0.03 | Down | Expressed protein                                                        |
| Pc_TC044711 | 0.97  | 0.34  |      |  | 2.18  | 0.02 | Up   | 0.74  | 0.62 |      | 1.63  | 0.1  |      | Expressed protein                                                        |
| Pc_TC044728 | 0.59  | 0.53  |      |  | -0.09 | 0.99 |      | 0     | 0.01 |      | -3.77 | 0.01 | Down | Expressed protein                                                        |
| Pc_TC044764 | 0     | 0.31  |      |  | 0     | 0.36 |      | 3.15  | 0.04 | Up   | 1.95  | 0.19 |      | Expressed protein                                                        |
| Pc_TC044774 | -0.92 | 0.83  |      |  | -0.36 | 1    |      | 3.12  | 0.05 | Up   | 1.21  | 0.5  |      | Expressed protein                                                        |
| Pc_TC044794 | -0.14 | 0.89  |      |  | -2.16 | 0.05 | Down | -0.76 | 0.55 |      | 0.04  | 0.99 |      | Expressed protein                                                        |
| Pc_TC044796 | -0.36 | 0.26  |      |  | 1.13  | 0    | Up   | -0.61 | 0.46 |      | -0.86 | 0.09 |      | Expressed protein                                                        |
| Pc_TC044800 | -0.48 | 0.62  |      |  | -0.57 | 0.6  |      | -3.45 | 0.03 | Down | -1.74 | 0.11 |      | Expressed protein                                                        |
| Pc_TC044814 | 0     | 1     |      |  | 0     | 1    |      | 4.46  | 0.03 | Up   | 2.63  | 0.32 |      | Expressed protein                                                        |
| Pc_TC044836 | 3.12  | 0.01  | Up   |  | 0     | 0.36 |      | 0.67  | 0.82 |      | -1.37 | 0.66 |      | Expressed protein                                                        |
| Pc_TC044858 | 0.73  | 0.14  |      |  | 1.52  | 0.01 | Up   | -2.55 | 0.02 | Down | -1.26 | 0.07 |      | Expressed protein                                                        |
| Pc_TC044867 | -1.51 | 0.77  |      |  | 1.93  | 0.29 |      | 4.56  | 0    | Up   | 2.74  | 0.06 |      | Expressed protein                                                        |
| Pc_TC044872 | 3.32  | 0     | Up   |  | 0     | 0.15 |      | 2.45  | 0.09 |      | 1.28  | 0.34 |      | thioredoxin M-type 4                                                     |
| Pc_TC044873 | 1.66  | 0.48  |      |  | 2.87  | 0.11 |      | 3.59  | 0.05 | Up   | 1.63  | 0.49 |      | Expressed protein                                                        |
| Pc_TC044874 | 0.91  | 0.47  |      |  | 2.44  | 0.02 | Up   | -1.08 | 0.61 |      | 1.16  | 0.35 |      | Expressed protein                                                        |
| Pc_TC044876 | -2.19 | 0.01  | Down |  | -0.02 | 1    |      | 1.51  | 0.16 |      | 0.4   | 0.6  |      | Expressed protein                                                        |
| Pc_TC044885 | 0.6   | 0.29  |      |  | -0.19 | 0.8  |      | 0.38  | 0.72 |      | 1.45  | 0.03 | Up   | Putative uncharacterized protein Sb05g003140                             |
| Pc_TC044920 | -3.73 | 0.01  | Down |  | -2.75 | 0.04 | Down | 2.79  | 0.02 | Up   | 1.08  | 0.22 |      | Expressed protein                                                        |
| Pc_TC044929 | -0.84 | 0.19  |      |  | -1.96 | 0.01 | Down | 1.47  | 0.15 |      | -0.25 | 0.74 |      | Putative uncharacterized protein                                         |
| Pc_TC044933 | -0.24 | 0.95  |      |  | -0.68 | 0.73 |      | 2.72  | 0.04 | Up   | 1.51  | 0.18 |      | Expressed protein                                                        |
| Pc_TC044964 | 0.84  | 0.11  |      |  | 2.09  | 0    | Up   | -3.02 | 0.01 | Down | -1.28 | 0.08 |      | Expressed protein                                                        |
| Pc_TC044965 | 0.38  | 0.62  |      |  | 1.47  | 0.06 |      | -1.66 | 0.2  |      | -2.23 | 0.03 | Down | Expressed protein                                                        |
| Pc_TC044966 | 1.86  | 0.01  | Up   |  | 2.12  | 0.01 | Up   | -1.94 | 0.16 |      | 0.28  | 0.77 |      | Os06g0146800 protein                                                     |

|             |       |       |      |           |      |      |       |           |      |       |       |      |                                                                |
|-------------|-------|-------|------|-----------|------|------|-------|-----------|------|-------|-------|------|----------------------------------------------------------------|
| Pc_TC044967 | 0.65  | 0.24  |      | 1.45      | 0.02 | Up   | -7.64 | 6.29E-006 | Down | -4.71 | ##### | Down | Os06g0146800 protein                                           |
| Pc_TC044968 | 0.4   | 0.24  |      | 0.69      | 0.12 |      | -4.58 | 9.30E-006 | Down | -1.93 | 0     | Down | Os06g0146800 protein                                           |
| Pc_TC044969 | 0.68  | 0.03  |      | 1.13      | 0    | Up   | -6.41 | 1.94E-009 | Down | -2.39 | ##### | Down | Expressed protein                                              |
| Pc_TC044989 | 0.08  | 0.99  |      | -0.66     | 0.59 |      | -1.21 | 0.41      |      | -2.58 | 0.05  | Down | Expressed protein                                              |
| Pc_TC044994 | 0.66  | 0.81  |      | 2.92      | 0.03 | Up   | 2.09  | 0.24      |      | 2.21  | 0.12  |      | Expressed protein                                              |
| Pc_TC045005 | 0.58  | 0.58  |      | 0.36      | 0.79 |      | -4.58 | 0.03      | Down | -1.29 | 0.32  |      | Uncharacterized protein                                        |
| Pc_TC045010 | 0.52  | 0.51  |      | 0.25      | 0.81 |      | 0.89  | 0.46      |      | 1.85  | 0.02  | Up   | Expressed protein                                              |
| Pc_TC045024 | 0.19  | 0.68  |      | 0.72      | 0.18 |      | -4.26 | 0         | Down | -2.01 | 0     | Down | Expressed protein                                              |
| Pc_TC045025 | 2.22  | 0.02  | Up   | 2.02      | 0.06 |      | 0.83  | 0.61      |      | 2.14  | 0.04  | Up   | Expressed protein                                              |
| Pc_TC045031 | 2.35  | 0     | Up   | 2.92      | 0    | Up   | 0.54  | 0.71      |      | 1.5   | 0.11  |      | Expressed protein                                              |
| Pc_TC045045 | 2.92  | 0     | Up   | 0         | 0.2  |      | 3.71  | 0.01      | Up   | 1.8   | 0.16  |      | NADP-malic enzyme 4                                            |
| Pc_TC045064 | -2.73 | 0.05  | Down | -1.53     | 0.25 |      | 0.63  | 0.64      |      | 0.28  | 0.82  |      | cysteine-rich RLK (RECEPTOR-like protein kinase) 8             |
| Pc_TC045074 | -0.06 | 0.95  |      | 0.89      | 0.21 |      | -2.63 | 0.03      | Down | -1.83 | 0.03  | Down | Expressed protein                                              |
| Pc_TC045075 | 1.16  | 0.33  |      | 1.59      | 0.19 |      | -0.86 | 0.69      |      | 2.24  | 0.04  | Up   | Expressed protein                                              |
| Pc_TC045128 | 0.59  | 0.43  |      | 1.81      | 0.02 | Up   | -2.89 | 0.04      | Down | -1.68 | 0.09  |      | Expressed protein                                              |
| Pc_TC045175 | 2.21  | 0     | Up   | -3.11     | 0.06 |      | 1.29  | 0.32      |      | -0.22 | 0.89  |      | Expressed protein                                              |
| Pc_TC045191 | 2.58  | 0.02  | Up   | 0         | 0.2  |      | 1.44  | 0.4       |      | -0.96 | 0.68  |      | Expressed protein                                              |
| Pc_TC045198 | -0.69 | 0.59  |      | -0.22     | 0.91 |      | 3.05  | 0.01      | Up   | 1.15  | 0.25  |      | Expressed protein                                              |
| Pc_TC045202 | 0.66  | 0.97  |      | 1.06      | 0.8  |      | 4.06  | 0.02      | Up   | 2.71  | 0.12  |      | Putative uncharacterized protein Sb06g016046 (Fragment)        |
| Pc_TC045221 | 1.54  | 0.34  |      | 3.48      | 0    | Up   | 1.59  | 0.41      |      | -0.79 | 0.84  |      | Expressed protein                                              |
| Pc_TC045260 | 2.89  | 0.03  | Up   | 0         | 0.48 |      | 2.67  | 0.13      |      | 0.63  | 0.88  |      | Expressed protein                                              |
| Pc_TC045272 | 0     | 0.64  |      | 0         | 0.67 |      | 3.9   | 0.03      | Up   | 0     | 0.54  |      | Putative retroelement                                          |
| Pc_TC045275 | 3.45  | 0     | Up   | 0         | 0.48 |      | 2.5   | 0.17      |      | 1.63  | 0.38  |      | Expressed protein                                              |
| Pc_TC045305 | 0.01  | 0.98  |      | 0.24      | 0.65 |      | -2.23 | 0.03      | Down | -1.45 | 0.02  | Down | Expressed protein                                              |
| Pc_TC045307 | 3.43  | ##### | Up   | 0         | 0.07 |      | 2.77  | 0.04      | Up   | 1.89  | 0.08  |      | Expressed protein                                              |
| Pc_TC045336 | 3.4   | 0.02  | Up   | 3.23      | 0.05 |      | -0.5  | 1         |      | 3.43  | 0.02  | Up   | Expressed protein                                              |
| Pc_TC045352 | 2.95  | 0     | Up   | 0         | 0.03 |      | 2.96  | 0.02      | Up   | -1.49 | 0.32  |      | Expressed protein                                              |
| Pc_TC045365 | -3.24 | ##### | Down | -2.82     | 0    | Down | -2.96 | 0.02      | Down | -2.63 | 0     | Down | Expressed protein                                              |
| Pc_TC045439 | 2.29  | 0     | Up   | 0         | 0.01 |      | 2.94  | 0.01      | Up   | 1.23  | 0.19  |      | Expressed protein                                              |
| Pc_TC045440 | 0.08  | 1     |      | 1.64      | 0.53 |      | 1.5   | 0.6       |      | 3.15  | 0.05  | Up   | Expressed protein                                              |
| Pc_TC045443 | 2.36  | 0.02  | Up   | 0.87      | 0.57 |      | 0.75  | 0.68      |      | -0.2  | 0.98  |      | Uncharacterized protein                                        |
| Pc_TC045452 | 0.03  | 1     |      | 0.51      | 0.6  |      | -3.4  | 0.03      | Down | -1.11 | 0.29  |      | disulfide isomerase-like protein [Oryza sativa Japonica Group] |
| Pc_TC045463 | 1.13  | 0.24  |      | 2.03      | 0.03 | Up   | -4.4  | 0.05      | Down | -2.28 | 0.13  |      | Uncharacterized protein                                        |
| Pc_TC045471 | -4.09 | 0.02  | Down | -1.11     | 0.42 |      | -0.08 | 0.99      |      | 0.41  | 0.73  |      | homolog of SU(var)3-9 1                                        |
| Pc_TC045486 | -0.34 | 0.8   |      | 1.2       | 0.22 |      | -1.65 | 0.29      |      | -4.7  | 0.01  | Down | Ribosomal protein L19e family protein                          |
| Pc_TC045487 | 1.66  | 0.36  |      | 2.87      | 0.05 |      | 3.73  | 0.02      | Up   | 2.99  | 0.03  | Up   | Expressed protein                                              |
| Pc_TC045488 | 2.54  | 0.05  | Up   | 0         | 0.36 |      | 1.96  | 0.27      |      | 0.63  | 0.82  |      | Defender against death (DAD family) protein                    |
| Pc_TC045489 | -1.03 | 0.04  | Down | -0.58     | 0.33 |      | 0.58  | 0.54      |      | -0.05 | 0.94  |      | Carbohydrate-binding X8 domain superfamily protein             |
| Pc_TC045498 | -2.19 | 0.05  | Down | -0.34     | 0.77 |      | 0.2   | 0.9       |      | 0.12  | 0.93  |      | Expressed protein                                              |
| Pc_TC045535 | -2.51 | 0.05  | Down | -2.2      | 0.1  |      | -1.5  | 0.31      |      | -1.64 | 0.17  |      | Expressed protein                                              |
| Pc_TC045537 | 0.59  | 0.74  |      | 2.34      | 0.05 | Up   | -1.3  | 0.58      |      | 0.99  | 0.5   |      | Expressed protein                                              |
| Pc_TC045545 | 2.08  | 0.54  |      | 4.38      | 0.02 | Up   | 2.09  | 0.56      |      | 1.63  | 0.71  |      | Expressed protein                                              |
| Pc_TC045559 | 0.18  | 0.88  |      | -2.75     | 0.04 | Down | 1.38  | 0.25      |      | 0.75  | 0.42  |      | Expressed protein                                              |
| Pc_TC045560 | 2.82  | 0     | Up   | 0         | 0.09 |      | 2.38  | 0.08      |      | 0.91  | 0.49  |      | Expressed protein                                              |
| Pc_TC045564 | 1.17  | 0.35  |      | -0.94     | 0.67 |      | 3.48  | 0.01      | Up   | 2.33  | 0.03  | Up   | Expressed protein                                              |
| Pc_TC045568 | 3.2   | ##### | Up   | 0         | 0.05 |      | 1.9   | 0.16      |      | 1.38  | 0.22  |      | acyl-CoA binding protein 1                                     |
| Pc_TC045573 | 1     | 0.03  |      | 0.6       | 0.31 |      | -0.45 | 0.66      |      | 1.31  | 0.03  | Up   | Expressed protein                                              |
| Pc_TC045578 | 2.75  | 0     | Up   | 2.64      | 0.01 | Up   | 0     | 0.08      |      | -1.79 | 0.36  |      | Expressed protein                                              |
| Pc_TC045587 | 1.47  | 0.2   |      | 0.87      | 0.57 |      | 2.73  | 0.05      | Up   | 1.38  | 0.27  |      | Expressed protein                                              |
| Pc_TC045607 | -0.06 | 1     |      | -0.82     | 0.65 |      | 3     | 0.02      | Up   | 1.69  | 0.11  |      | Expressed protein                                              |
| Pc_TC045636 | -0.5  | 0.33  |      | -1.3      | 0.04 | Down | 0.96  | 0.32      |      | 0.46  | 0.47  |      | UniRef100                                                      |
| Pc_TC045663 | 0.56  | 0.17  |      | 0.51      | 0.32 |      | -3.64 | 0         | Down | -0.61 | 0.3   |      | Expressed protein                                              |
| Pc_TC045670 | 1.47  | 0.1   |      | 2.73      | 0    | Up   | -1.5  | 0.37      |      | 0.75  | 0.49  |      | Expressed protein                                              |
| Pc_TC045713 | 2.72  | 0.03  | Up   | 0         | 0.36 |      | 1.59  | 0.41      |      | -0.37 | 0.99  |      | Expressed protein                                              |
| Pc_TC045750 | 3.14  | 0     | Up   | 0         | 0.2  |      | 2.31  | 0.13      |      | 0.04  | 1     |      | Putative polyprotein                                           |
| Pc_TC045761 | 2.18  | 0.01  | Up   | 0         | 0.02 |      | 1.12  | 0.42      |      | 0.14  | 0.96  |      | Protein of unknown function (DUF2012)                          |
| Pc_TC045782 | 0.08  | 1     |      | 3.64      | 0.02 | Up   | 0     | 0.53      |      | 0     | 0.54  |      | Putative uncharacterized protein                               |
| Pc_TC045795 | 0.52  | 0.18  |      | 2.28E-022 | 0.63 |      | -0.44 | 0.63      |      | -2.23 | 0     | Down | Expressed protein                                              |
| Pc_TC045827 | 3.35  | ##### | Up   | 0         | 0.02 |      | 2.34  | 0.07      |      | 0.28  | 0.86  |      | 3-hydroxyacyl-CoA dehydrogenase family protein                 |
| Pc_TC045832 | -1.85 | 0.03  | Down | -2.19     | 0.03 | Down | 0.01  | 1         |      | -0.28 | 0.76  |      | Expressed protein                                              |
| Pc_TC045844 | -0.8  | 0.48  |      | -0.15     | 0.94 |      | 0     | 0.01      |      | -2.83 | 0.04  | Down | Expressed protein                                              |
| Pc_TC045905 | 2.92  | ##### | Up   | 0         | 0.01 |      | 2.38  | 0.05      | Up   | 0.79  | 0.43  |      | Expressed protein                                              |

|             |       |       |      |       |           |      |  |       |           |      |       |       |      |                                                     |     |
|-------------|-------|-------|------|-------|-----------|------|--|-------|-----------|------|-------|-------|------|-----------------------------------------------------|-----|
| Pc_TC045910 | 0.32  | 0.53  |      | 0.84  | 0.16      |      |  | -3.58 | 0         | Down | -1.39 | 0.05  | Down | Expressed protein                                   |     |
| Pc_TC045934 | 1.71  | 0.01  | Up   | -0.94 | 0.35      |      |  | 0.11  | 0.95      |      | -0.27 | 0.79  |      | Expressed protein                                   |     |
| Pc_TC045943 | 2.49  | 0     | Up   | 0     | 0.04      |      |  | 2.36  | 0.07      |      | -0.64 | 0.68  |      | PAM domain (PCI/PINT associated module) protein     |     |
| Pc_TC045946 | -1.09 | 0.55  |      | -0.53 | 0.82      |      |  | 2.83  | 0.04      | Up   | 1.5   | 0.2   |      | Putative non-LTR retroelement reverse transcriptase |     |
| Pc_TC045959 | 0.99  | 0.45  |      | 2.48  | 0.02      | Up   |  | 0     | 0.08      |      | -3.37 | 0.15  |      | gag protein                                         |     |
| Pc_TC045967 | 0.56  | 0.31  |      | 1.1   | 0.08      |      |  | -4.43 | 0         | Down | -1.54 | 0.04  | Down | Expressed protein                                   |     |
| Pc_TC046000 | -0.08 | 0.89  |      | 0.23  | 0.7       |      |  | -2.31 | 0.03      | Down | -2.8  | 0     | Down | Expressed protein                                   |     |
| Pc_TC046002 | 0.11  | 0.78  |      | 0.19  | 0.69      |      |  | -2.14 | 0.02      | Down | -1.36 | 0.02  | Down | Expressed protein                                   |     |
| Pc_TC046016 | 0.01  | 0.99  |      | 0.35  | 0.47      |      |  | -1.64 | 0.08      |      | -1.66 | 0.01  | Down | Uncharacterized protein                             | HSF |
| Pc_TC046025 | 1.74  | 0.16  |      | 0.64  | 0.76      |      |  | 2.73  | 0.06      |      | 2.4   | 0.04  | Up   | Expressed protein                                   |     |
| Pc_TC046072 | 0     | 0.64  |      | 0     | 0.67      |      |  | 6.13  | 6.44E-005 | Up   | -0.37 | 1     |      | Expressed protein                                   |     |
| Pc_TC046119 | 2.4   | 0.4   |      | 4.06  | 0.04      | Up   |  | 0     | 0.87      |      | 0     | 0.9   |      | Expressed protein                                   |     |
| Pc_TC046120 | 0.08  | 1     |      | -1.36 | 0.54      |      |  | 3.37  | 0.01      | Up   | 1.08  | 0.41  |      | aconitase 3                                         |     |
| Pc_TC046144 | 0.43  | 0.4   |      | 1.2   | 0.04      | Up   |  | -1.73 | 0.11      |      | 0.37  | 0.57  |      | Expressed protein                                   |     |
| Pc_TC046178 | 2.33  | 0.02  | Up   | 1.58  | 0.21      |      |  | 2.26  | 0.11      |      | 1.53  | 0.21  |      | Expressed protein                                   |     |
| Pc_TC046181 | 3.31  | ##### | Up   | 0     | 0         |      |  | 3.24  | 0.01      | Up   | 0.13  | 0.94  |      | Zinc-binding dehydrogenase family protein           |     |
| Pc_TC046196 | 0     | 1     |      | 4.23  | 0.02      | Up   |  | 0     | 0.87      |      | 0     | 0.9   |      | Expressed protein                                   |     |
| Pc_TC046199 | -1.92 | 0     | Down | -2.27 | 0         | Down |  | 1.17  | 0.22      |      | -0.32 | 0.63  |      | Expressed protein                                   |     |
| Pc_TC046207 | 2.08  | 0.54  |      | 4.15  | 0.03      | Up   |  | 1.5   | 0.78      |      | 2.43  | 0.39  |      | Expressed protein                                   |     |
| Pc_TC046234 | 2.19  | 0.01  | Up   | 0     | 0.01      |      |  | 1.26  | 0.33      |      | -0.46 | 0.73  |      | Expressed protein                                   |     |
| Pc_TC046254 | 1.95  | 0.01  | Up   | 0     | 0         |      |  | 1.12  | 0.35      |      | 0.45  | 0.65  |      | ATPase,F1 complex,delta/epsilon subunit             |     |
| Pc_TC046279 | 0.02  | 0.97  |      | 0.12  | 0.84      |      |  | -0.56 | 0.57      |      | -1.3  | 0.04  | Down | Putative uncharacterized protein                    |     |
| Pc_TC046288 | 0.46  | 0.49  |      | 1.28  | 0.07      |      |  | -1.68 | 0.16      |      | -1.73 | 0.05  | Down | Expressed protein                                   |     |
| Pc_TC046307 | 0.76  | 0.55  |      | 2.23  | 0.04      | Up   |  | 0.5   | 0.79      |      | 0.21  | 0.94  |      | Expressed protein                                   |     |
| Pc_TC046309 | 0.55  | 0.4   |      | -2.79 | 0         | Down |  | -2.21 | 0.08      |      | -1.22 | 0.15  |      | hAT transposon superfamily                          |     |
| Pc_TC046317 | -0.56 | 0.7   |      | -0.94 | 0.54      |      |  | -2.3  | 0.21      |      | -4.18 | 0.03  | Down | Putative polyprotein                                |     |
| Pc_TC046318 | -0.18 | 0.84  |      | 0.06  | 0.97      |      |  | -6.11 | 0         | Down | 1.32  | 0.09  |      | Protein kinase superfamily protein                  |     |
| Pc_TC046319 | 0.5   | 0.39  |      | 0.35  | 0.62      |      |  | 1.05  | 0.31      |      | 1.45  | 0.03  | Up   | Protein kinase superfamily protein                  |     |
| Pc_TC046320 | -0.47 | 0.36  |      | -1.32 | 0.04      | Down |  | -2.3  | 0.03      | Down | -0.8  | 0.23  |      | Protein kinase superfamily protein                  |     |
| Pc_TC046339 | 1.17  | 0.07  |      | 0.5   | 0.53      |      |  | -2.77 | 0.04      | Down | 1.51  | 0.04  | Up   | Expressed protein                                   |     |
| Pc_TC046349 | 0.83  | 0.29  |      | 1.81  | 0.03      | Up   |  | -0.37 | 0.79      |      | 0.35  | 0.72  |      | Expressed protein                                   |     |
| Pc_TC046366 | 1.32  | 0.21  |      | 2.33  | 0.02      | Up   |  | 1.57  | 0.27      |      | 1.41  | 0.2   |      | Expressed protein                                   |     |
| Pc_TC046370 | 0.75  | 0.07  |      | 0.9   | 0.08      |      |  | -3.58 | 0         | Down | -1    | 0.11  |      | Expressed protein                                   |     |
| Pc_TC046371 | 0.28  | 0.69  |      | 0.61  | 0.43      |      |  | -4.96 | 0         | Down | -1.96 | 0.03  | Down | Expressed protein                                   |     |
| Pc_TC046380 | -0.51 | 1     |      | 0.8   | 0.82      |      |  | 3.34  | 0.04      | Up   | 0.85  | 0.76  |      | Expressed protein                                   |     |
| Pc_TC046392 | 1.48  | ##### | Up   | 0     | 1.12E-020 |      |  | 1.4   | 0.12      |      | 0.03  | 0.97  |      | poly(A) binding protein 8                           |     |
| Pc_TC046401 | -0.65 | 0.47  |      | -0.67 | 0.51      |      |  | -1.42 | 0.29      |      | -2.3  | 0.03  | Down | Expressed protein                                   |     |
| Pc_TC046473 | 2.54  | 0     | Up   | 0     | 0.02      |      |  | 0.94  | 0.51      |      | 0.14  | 0.96  |      | Signal peptidase subunit                            |     |
| Pc_TC046488 | -3.78 | 0.01  | Down | -2.8  | 0.03      | Down |  | -0.07 | 0.98      |      | -1.15 | 0.29  |      | unknown protein.                                    |     |
| Pc_TC046523 | 0.17  | 0.94  |      | 0.15  | 0.96      |      |  | -4.4  | 0.05      | Down | 0     | 0.01  |      | Expressed protein                                   |     |
| Pc_TC046567 | 3.4   | 0.02  | Up   | 0     | 0.67      |      |  | 2.67  | 0.2       |      | 1.95  | 0.36  |      | Expressed protein                                   |     |
| Pc_TC046581 | 1.54  | 0.11  |      | 2.4   | 0.01      | Up   |  | -1.5  | 0.42      |      | -0.15 | 0.97  |      | Expressed protein                                   |     |
| Pc_TC046600 | 2.94  | ##### | Up   | 0     | 0.01      |      |  | 2.32  | 0.05      |      | 0.96  | 0.32  |      | Expressed protein                                   |     |
| Pc_TC046653 | 0.19  | 0.84  |      | 1.53  | 0.06      |      |  | -3.2  | 0.03      | Down | -1.2  | 0.22  |      | Expressed protein                                   |     |
| Pc_TC046695 | -3.83 | 0.04  | Down | 1.15  | 0.29      |      |  | -0.16 | 0.96      |      | -1.7  | 0.23  |      | manganese superoxide dismutase 1                    |     |
| Pc_TC046703 | 1.84  | 0.06  |      | 2.2   | 0.04      | Up   |  | -0.5  | 0.82      |      | 0.55  | 0.71  |      | Expressed protein                                   |     |
| Pc_TC046714 | 2.08  | 0.06  |      | 2.46  | 0.03      | Up   |  | 0     | 0.11      |      | -1.6  | 0.44  |      | Expressed protein                                   |     |
| Pc_TC046715 | -1.24 | 0.47  |      | -0.94 | 0.62      |      |  | 2.91  | 0.03      | Up   | 1.43  | 0.21  |      | Expressed protein                                   |     |
| Pc_TC046726 | 1.14  | 0.12  |      | 1.73  | 0.03      | Up   |  | -0.3  | 0.83      |      | -0.25 | 0.82  |      | Expressed protein                                   |     |
| Pc_TC046743 | 1.45  | 0.05  | Up   | 0.6   | 0.53      |      |  | -0.28 | 0.85      |      | 0.29  | 0.78  |      | DDT domain superfamily                              |     |
| Pc_TC046750 | -0.51 | 0.64  |      | -0.53 | 0.67      |      |  | -0.91 | 0.53      |      | -4.96 | 0     | Down | Expressed protein                                   |     |
| Pc_TC046755 | -0.09 | 0.97  |      | 1     | 0.28      |      |  | 0     | 0         |      | -2.81 | 0.03  | Down | Expressed protein                                   |     |
| Pc_TC046762 | -0.34 | 0.93  |      | 2.27  | 0.04      | Up   |  | -1.91 | 0.4       |      | -0.79 | 0.69  |      | Expressed protein                                   |     |
| Pc_TC046816 | -0.02 | 1     |      | 0.4   | 0.78      |      |  | -4.4  | 0.05      | Down | -1.11 | 0.42  |      | Expressed protein                                   |     |
| Pc_TC046817 | -1.18 | 0.23  |      | -1.2  | 0.28      |      |  | 5.47  | 7.63E-007 | Up   | 4.1   | ##### | Up   | Expressed protein                                   |     |
| Pc_TC046829 | 1     | 0.07  |      | -0.17 | 0.82      |      |  | 0.7   | 0.51      |      | 1.38  | 0.04  | Up   | Expressed protein                                   |     |
| Pc_TC046841 | 1.86  | 0.01  | Up   | 1.72  | 0.04      | Up   |  | 1.12  | 0.36      |      | 1.8   | 0.03  | Up   | BtR175                                              |     |
| Pc_TC046847 | 2.45  | 0     | Up   | 0     | 0.01      |      |  | 1.84  | 0.14      |      | 0.9   | 0.37  |      | NADH:ubiquinone oxidoreductase,17.2kDa subunit      |     |
| Pc_TC046873 | -0.01 | 0.99  |      | 0.7   | 0.19      |      |  | -3.21 | 0         | Down | -2.4  | 0     | Down | cysteine-rich RLK (RECEPTOR-like protein kinase) 8  |     |
| Pc_TC046888 | 0.42  | 0.42  |      | 0.36  | 0.57      |      |  | -5.11 | 7.70E-005 | Down | -2.37 | 0     | Down | Putative uncharacterized protein                    |     |
| Pc_TC046891 | -3.73 | 0.05  | Down | -0.16 | 0.96      |      |  | 0.94  | 0.51      |      | 0.07  | 1     |      | Expressed protein                                   |     |
| Pc_TC046895 | 3     | 0     | Up   | 0     | 0.15      |      |  | 1.65  | 0.29      |      | 0.14  | 1     |      | Expressed protein                                   |     |

|             |       |       |      |       |           |      |       |           |      |       |       |      |                                                               |
|-------------|-------|-------|------|-------|-----------|------|-------|-----------|------|-------|-------|------|---------------------------------------------------------------|
| Pc_TC046905 | 3.72  | 0.01  | Up   | 4.52  | 0         | Up   | 1.5   | 0.6       |      | 0.21  | 1     |      | Expressed protein                                             |
| Pc_TC046931 | 1.83  | 0.09  |      | 2.42  | 0.03      | Up   | -2.5  | 0.3       |      | -0.2  | 0.98  |      | Expressed protein                                             |
| Pc_TC046936 | 2.3   | 0.04  | Up   | 1.8   | 0.19      |      | 0.62  | 0.79      |      | 1.56  | 0.25  |      | Expressed protein                                             |
| Pc_TC046938 | 1.08  | 0.43  |      | 0.84  | 0.61      |      | 1.6   | 0.31      |      | 2.65  | 0.02  | Up   | Expressed protein                                             |
| Pc_TC046941 | -3.55 | 0     | Down | -1.15 | 0.27      |      | -0.8  | 0.54      |      | -1    | 0.31  |      | Expressed protein                                             |
| Pc_TC046945 | 0.08  | 1     |      | -1.53 | 0.58      |      | 2.85  | 0.05      |      | 2.71  | 0.02  | Up   | Expressed protein                                             |
| Pc_TC046949 | 2.56  | 0     | Up   | 0     | 0.07      |      | 2.41  | 0.07      |      | 0.95  | 0.45  |      | P-loop nucleoside triphosphate hydrolases superfamily protein |
| Pc_TC046959 | 2.66  | 0.03  | Up   | 0     | 0.36      |      | 0.09  | 1         |      | -2.37 | 0.46  |      | Expressed protein                                             |
| Pc_TC046961 | 1.89  | 0.38  |      | 3.31  | 0.04      | Up   | 0     | 0.53      |      | 0     | 0.54  |      | Expressed protein                                             |
| Pc_TC046963 | 0.64  | 0.19  |      | 0.94  | 0.1       |      | -2.49 | 0.02      | Down | -1.64 | 0.02  | Down | Putative uncharacterized protein                              |
| Pc_TC046978 | 2.5   | 0.01  | Up   | 0     | 0.11      |      | 2.46  | 0.08      |      | 0.8   | 0.58  |      | Expressed protein                                             |
| Pc_TC047011 | -0.14 | 0.77  |      | 0.61  | 0.27      |      | -2.49 | 0.02      | Down | -2.36 | 0     | Down | Expressed protein                                             |
| Pc_TC047034 | 3.42  | 0     | Up   | 0     | 0.2       |      | 3.29  | 0.02      | Up   | 1.9   | 0.14  |      | Expressed protein                                             |
| Pc_TC047044 | -3.92 | 0.03  | Down | -1.13 | 0.44      |      | 1.86  | 0.15      |      | 1.12  | 0.28  |      | Expressed protein                                             |
| Pc_TC047047 | 3.33  | 0.03  | Up   | 0     | 0.67      |      | 2.5   | 0.25      |      | 1.95  | 0.36  |      | C2H2 and C2HC zinc fingers superfamily protein                |
| Pc_TC047092 | 0.31  | 0.56  |      | 0.97  | 0.11      |      | -3.14 | 0.01      | Down | -1.42 | 0.05  | Down | Expressed protein                                             |
| Pc_TC047113 | -1.51 | 0.24  |      | -1.11 | 0.42      |      | 0     | 0.01      |      | -3.54 | 0.03  | Down | protein,putative,unclassified                                 |
| Pc_TC047137 | -0.12 | 0.89  |      | 1.42  | 0.04      | Up   | -2.84 | 0.03      | Down | -0.72 | 0.39  |      | Expressed protein                                             |
| Pc_TC047144 | 0.01  | 1     |      | -1.44 | 0.11      |      | -1.39 | 0.25      |      | -2.31 | 0.01  | Down | cDNA,clone: J065174I21,full insert sequence                   |
| Pc_TC047145 | 0.8   | 0.07  |      | 1.49  | 0.01      | Up   | -3.38 | 0         | Down | -0.79 | 0.22  |      | Transposon protein,putative,Mutator sub-class                 |
| Pc_TC047146 | -0.12 | 0.77  |      | 0.23  | 0.64      |      | -5.11 | 4.21E-006 | Down | -1.85 | 0     | Down | Transposon protein,putative,Mutator sub-class                 |
| Pc_TC047147 | -0.63 | 0.11  |      | 0.24  | 0.62      |      | -3.01 | 0         | Down | -1.39 | 0.02  | Down | cDNA,clone: J065174I21,full insert sequence                   |
| Pc_TC047149 | 0.48  | 0.14  |      | -0.17 | 0.69      |      | -2.25 | 0.01      | Down | -0.99 | 0.06  |      | cDNA,clone: J065174I21,full insert sequence                   |
| Pc_TC047150 | 0.62  | 0.21  |      | 1.53  | 0.01      | Up   | -0.47 | 0.65      |      | -0.33 | 0.62  |      | Expressed protein                                             |
| Pc_TC047180 | -3.66 | 0     | Down | -4.26 | 0         | Down | -2.36 | 0.09      |      | -4.11 | 0     | Down | GTP binding Elongation factor Tu family protein               |
| Pc_TC047228 | -0.11 | 0.81  |      | -0.39 | 0.49      |      | -1.68 | 0.09      |      | -1.28 | 0.04  | Down | ATP/GTP-binding protein family                                |
| Pc_TC047281 | 3.08  | 0.01  | Up   | 0     | 0.36      |      | 2.67  | 0.1       |      | 2.38  | 0.08  |      | Expressed protein                                             |
| Pc_TC047284 | 1.59  | 0.03  | Up   | 0.95  | 0.3       |      | -0.78 | 0.58      |      | 1.77  | 0.03  | Up   | Expressed protein                                             |
| Pc_TC047310 | 1.08  | 0.18  |      | 1.86  | 0.03      | Up   | -3.14 | 0.06      |      | -5.02 | 0     | Down | Expressed protein                                             |
| Pc_TC047311 | 0.25  | 0.66  |      | 0.47  | 0.47      |      | -3.35 | 0.01      | Down | -6.16 | ##### | Down | Calcium-binding EF-hand family protein                        |
| Pc_TC047321 | 1.79  | 0.02  | Up   | 0     | 0.01      |      | 0.63  | 0.64      |      | -0.52 | 0.67  |      | Class I glutamine amidotransferase-like superfamily protein   |
| Pc_TC047328 | 3.78  | 0.05  | Up   | 2.38  | 0.46      |      | 2.09  | 0.56      |      | 1.63  | 0.71  |      | Expressed protein                                             |
| Pc_TC047344 | 1.9   | 0.04  | Up   | 1.88  | 0.08      |      | 2.76  | 0.03      | Up   | 1.45  | 0.19  |      | Expressed protein                                             |
| Pc_TC047370 | 0.08  | 0.97  |      | -0.09 | 0.96      |      | 0     | 0         |      | -4.28 | 0     | Down | Expressed protein                                             |
| Pc_TC047371 | -1.38 | 0.08  |      | -1.28 | 0.16      |      | -4.47 | 0         | Down | -3.18 | 0     | Down | Expressed protein                                             |
| Pc_TC047372 | 1.28  | 0.1   |      | 1.78  | 0.04      | Up   | 0.45  | 0.74      |      | -0.49 | 0.66  |      | Expressed protein                                             |
| Pc_TC047373 | -0.37 | 0.64  |      | 0.72  | 0.38      |      | -1.03 | 0.41      |      | -3.27 | 0     | Down | Expressed protein                                             |
| Pc_TC047386 | 1.79  | 0.01  | Up   | 0     | 0         |      | 1.23  | 0.31      |      | 0.29  | 0.78  |      | protein,putative,unclassified                                 |
| Pc_TC047393 | 1.22  | 0.2   |      | 1.98  | 0.04      | Up   | -1.82 | 0.3       |      | -0.28 | 0.87  |      | Expressed protein                                             |
| Pc_TC047441 | 3.59  | 0     | Up   | 0     | 0.27      |      | 1.88  | 0.26      |      | -0.11 | 1     |      | Expressed protein                                             |
| Pc_TC047442 | 1.92  | 0     | Up   | 0     | 3.51E-005 |      | 2.36  | 0.03      | Up   | 0.39  | 0.65  |      | Heat shock protein 70 (Hsp 70) family protein                 |
| Pc_TC047456 | 2.78  | 0.02  | Up   | 0     | 0.36      |      | 1.09  | 0.63      |      | 0.21  | 1     |      | Expressed protein                                             |
| Pc_TC047462 | 2.17  | 0.02  | Up   | 0     | 0.05      |      | 1.57  | 0.27      |      | 0.07  | 1     |      | Expressed protein                                             |
| Pc_TC047522 | 1.43  | 0.08  |      | 1.62  | 0.08      |      | -0.43 | 0.79      |      | 2.23  | 0.01  | Up   | Expressed protein                                             |
| Pc_TC047536 | 1.16  | 0.19  |      | 2.44  | 0.01      | Up   | 0     | 0.01      |      | -2.54 | 0.08  |      | Expressed protein                                             |
| Pc_TC047546 | -2.11 | 0     | Down | 0     | 1.59E-009 |      | -2.44 | 0.03      | Down | -6.56 | ##### | Down | Expressed protein                                             |
| Pc_TC047548 | 2.34  | 0.05  | Up   | 2.2   | 0.11      |      | 1.99  | 0.23      |      | 1.3   | 0.4   |      | Expressed protein                                             |
| Pc_TC047561 | -1.14 | 0.61  |      | 2.34  | 0.05      | Up   | -2.3  | 0.36      |      | -0.18 | 1     |      | Expressed protein                                             |
| Pc_TC047594 | -0.24 | 0.68  |      | 0.58  | 0.37      |      | -2.39 | 0.03      | Down | -0.99 | 0.17  |      | Expressed protein                                             |
| Pc_TC047618 | 1.46  | 0     | Up   | 0     | 8.97E-015 |      | 1.01  | 0.28      |      | -0.58 | 0.37  |      | Ribosomal protein L7Ae/L30e/S12e/Gadd45 family protein        |
| Pc_TC047631 | -1.34 | 0.5   |      | 2.61  | 0.02      | Up   | -2.5  | 0.3       |      | -3.37 | 0.15  |      | phosphate deficiency response 2                               |
| Pc_TC047643 | -0.28 | 0.94  |      | 2.17  | 0.05      | Up   | -1.67 | 0.43      |      | -0.54 | 0.78  |      | Expressed protein                                             |
| Pc_TC047729 | 2.4   | 0.03  | Up   | 0     | 0.2       |      | 1.31  | 0.45      |      | -1.37 | 0.55  |      | Expressed protein                                             |
| Pc_TC047732 | -1.84 | 0.01  | Down | -0.22 | 0.78      |      | 1.04  | 0.32      |      | 0.74  | 0.3   |      | Expressed protein                                             |
| Pc_TC047733 | 1.56  | 0.02  | Up   | -1.06 | 0.31      |      | 0.79  | 0.51      |      | 0.64  | 0.46  |      | Expressed protein                                             |
| Pc_TC047738 | -0.44 | 0.66  |      | -1.53 | 0.19      |      | 3.22  | 0         | Up   | 1.86  | 0.02  | Up   | Expressed protein                                             |
| Pc_TC047740 | -2.56 | ##### | Down | -1.04 | 0.11      |      | 0.12  | 0.91      |      | -0.79 | 0.23  |      | Expressed protein                                             |
| Pc_TC047764 | 0.32  | 0.74  |      | -0.66 | 0.56      |      | 1.37  | 0.26      |      | 1.69  | 0.05  | Up   | Expressed protein                                             |
| Pc_TC047765 | -0.15 | 0.85  |      | -1.88 | 0.04      | Down | 0.93  | 0.39      |      | -0.02 | 0.99  |      | Expressed protein                                             |
| Pc_TC047778 | 0.08  | 1     |      | -0.86 | 0.54      |      | -4.58 | 0.03      | Down | -1.46 | 0.27  |      | Expressed protein                                             |
| Pc_TC047794 | 0     | 0     |      | -3.26 | 0.05      | Down | -0.01 | 1         |      | -0.24 | 0.87  |      | Expressed protein                                             |
| Pc_TC047813 | -1.75 | 0.03  | Down | -1.28 | 0.14      |      | 1.71  | 0.11      |      | 0.49  | 0.53  |      | Expressed protein                                             |

|             |       |       |      |  |       |      |      |       |           |      |       |       |      |                                                        |
|-------------|-------|-------|------|--|-------|------|------|-------|-----------|------|-------|-------|------|--------------------------------------------------------|
| Pc_TC047823 | -0.28 | 0.94  |      |  | -2.11 | 0.33 |      | 2.76  | 0.04      | Up   | 0.7   | 0.62  |      | cellulose synthase-like D3                             |
| Pc_TC047830 | 0.59  | 0.74  |      |  | 2.74  | 0.01 | Up   | -0.13 | 1         |      | -0.18 | 1     |      | Expressed protein                                      |
| Pc_TC047875 | 1.58  | 0.22  |      |  | 2.43  | 0.05 | Up   | -1.5  | 0.56      |      | -0.15 | 1     |      | Expressed protein                                      |
| Pc_TC047882 | 2.04  | 0.03  | Up   |  | 3.48  | 0    | Up   | 0.57  | 0.75      |      | 0.55  | 0.71  |      | Ribosomal protein L7Ae/L30e/S12e/Gadd45 family protein |
| Pc_TC047918 | 2.51  | 0.03  | Up   |  | 2.44  | 0.06 |      | 2.18  | 0.18      |      | 1.76  | 0.21  |      | Expressed protein                                      |
| Pc_TC047925 | 0.38  | 0.53  |      |  | 0.73  | 0.28 |      | -2.77 | 0.02      | Down | -1.04 | 0.17  |      | Expressed protein                                      |
| Pc_TC047963 | 2.6   | 0.04  | Up   |  | 0     | 0.36 |      | 1.67  | 0.38      |      | -2.37 | 0.46  |      | Expressed protein                                      |
| Pc_TC047975 | 0.18  | 0.7   |      |  | -0.12 | 0.85 |      | -1.82 | 0.08      |      | -1.57 | 0.02  | Down | Expressed protein                                      |
| Pc_TC047976 | 2.15  | 0.01  | Up   |  | 1.85  | 0.06 |      | -1.23 | 0.46      |      | 1.08  | 0.31  |      | Expressed protein                                      |
| Pc_TC048032 | -1.24 | 0.67  |      |  | 2.78  | 0.02 | Up   | -1.23 | 0.68      |      | -2.7  | 0.34  |      | Expressed protein                                      |
| Pc_TC048066 | 0.71  | 0.57  |      |  | -0.4  | 0.85 |      | 1.72  | 0.22      |      | 2.32  | 0.02  | Up   | Expressed protein                                      |
| Pc_TC048069 | -1.42 | 0.14  |      |  | -2.03 | 0.08 |      | 2.37  | 0.04      | Up   | 1.43  | 0.08  |      | Expressed protein                                      |
| Pc_TC048077 | -0.41 | 0.64  |      |  | 0.16  | 0.88 |      | -3.89 | 0.01      | Down | -1.96 | 0.05  |      | TIR-NBS-LRR type disease resistance protein            |
| Pc_TC048084 | 1.4   | 0.4   |      |  | -0.94 | 0.84 |      | 3.96  | 0.01      | Up   | 2.43  | 0.07  |      | Expressed protein                                      |
| Pc_TC048133 | 0.1   | 0.79  |      |  | 0.68  | 0.16 |      | -4.53 | 2.76E-005 | Down | -3.09 | ##### | Down | Expressed protein                                      |
| Pc_TC048135 | -0.51 | 0.55  |      |  | 0.52  | 0.55 |      | -3.18 | 0.03      | Down | -0.82 | 0.38  |      | Expressed protein                                      |
| Pc_TC048144 | -1.42 | 0.14  |      |  | -3.44 | 0.01 | Down | 1.14  | 0.33      |      | 0.37  | 0.7   |      | Expressed protein                                      |
| Pc_TC048189 | -0.16 | 0.97  |      |  | -1.64 | 0.33 |      | 2.75  | 0.03      | Up   | 1.9   | 0.06  |      | Expressed protein                                      |
| Pc_TC048196 | -0.51 | 0.4   |      |  | 0.8   | 0.22 |      | -3.2  | 0.01      | Down | -2.25 | 0     | Down | Expressed protein                                      |
| Pc_TC048207 | -0.26 | 0.83  |      |  | 0.28  | 0.82 |      | 0.98  | 0.44      |      | 1.82  | 0.03  | Up   | Leucine-rich repeat protein kinase family protein      |
| Pc_TC048217 | 3.14  | 0     | Up   |  | 0     | 0.09 |      | 2.81  | 0.04      | Up   | 0.98  | 0.45  |      | Expressed protein                                      |
| Pc_TC048219 | 3.85  | ##### | Up   |  | 0     | 0.02 |      | 4.01  | 0         | Up   | 1.4   | 0.17  |      | Expressed protein                                      |
| Pc_TC048253 | 3.54  | 0     | Up   |  | 0     | 0.27 |      | 2.85  | 0.06      |      | -1.11 | 0.68  |      | Expressed protein                                      |
| Pc_TC048263 | 2.08  | 0.3   |      |  | 3.58  | 0.02 | Up   | 1.09  | 0.77      |      | 1.95  | 0.36  |      | Expressed protein                                      |
| Pc_TC048284 | 0.77  | 0.49  |      |  | 2.11  | 0.03 | Up   | -0.39 | 0.85      |      | -1.08 | 0.46  |      | Expressed protein                                      |
| Pc_TC048285 | 2.72  | 0.03  | Up   |  | 0     | 0.36 |      | -0.5  | 0.95      |      | 0.21  | 1     |      | Expressed protein                                      |
| Pc_TC048312 | 3.21  | 0     | Up   |  | 0     | 0.36 |      | 3     | 0.06      |      | 1.33  | 0.44  |      | Expressed protein                                      |
| Pc_TC048319 | -0.11 | 0.99  |      |  | 0.23  | 0.9  |      | -3.5  | 0.08      |      | -3.37 | 0.04  | Down | Expressed protein                                      |
| Pc_TC048329 | 2.59  | 0     | Up   |  | 0     | 0.01 |      | 2.1   | 0.09      |      | 0.59  | 0.58  |      | Uncharacterized protein                                |
| Pc_TC048338 | -0.92 | 0.65  |      |  | 0.23  | 0.97 |      | 3.06  | 0.02      | Up   | 1.91  | 0.1   |      | Expressed protein                                      |
| Pc_TC048351 | 0.82  | 0.63  |      |  | -0.53 | 0.89 |      | 2.31  | 0.13      |      | 2.8   | 0.01  | Up   | Expressed protein                                      |
| Pc_TC048374 | 1.75  | 0.01  | Up   |  | 0     | 0    |      | 1.49  | 0.19      |      | -0.3  | 0.76  |      | eukaryotic translation initiation factor 4E            |
| Pc_TC048377 | 3.08  | 0.01  | Up   |  | 0     | 0.36 |      | 2.03  | 0.25      |      | 0.63  | 0.82  |      | Expressed protein                                      |
| Pc_TC048406 | 0     | 1     |      |  | 0.67  | 0.27 |      | -3.25 | 0         | Down | -1.61 | 0.02  | Down | Expressed protein                                      |
| Pc_TC048431 | -0.92 | 1     |      |  | 2.06  | 0.36 |      | 3.71  | 0.04      | Up   | 2.21  | 0.26  |      | Expressed protein                                      |
| Pc_TC048441 | -1.54 | 0.04  | Down |  | -1.22 | 0.15 |      | 0.06  | 0.97      |      | -0.61 | 0.45  |      | RPS5-like 1                                            |
| Pc_TC048460 | -2.17 | 0.11  |      |  | -4.19 | 0.03 | Down | -3.16 | 0.08      |      | -1.45 | 0.25  |      | heat shock protein 70                                  |
| Pc_TC048475 | -1.15 | 0.02  | Down |  | -1.8  | 0    | Down | -6.79 | 5.71E-007 | Down | -2.88 | ##### | Down | Expressed protein                                      |
| Pc_TC048476 | -2.83 | 0.02  | Down |  | -3.85 | 0.01 | Down | -4.4  | 0.01      | Down | -2.47 | 0.04  | Down | Expressed protein                                      |
| Pc_TC048478 | 0.99  | 0.45  |      |  | 0.23  | 0.97 |      | 2.73  | 0.05      | Up   | 2.48  | 0.02  | Up   | Expressed protein                                      |
| Pc_TC048494 | 2.52  | 0.01  | Up   |  | 0     | 0.15 |      | 0.28  | 0.95      |      | -0.01 | 1     |      | Expressed protein                                      |
| Pc_TC048508 | 3.08  | 0.05  | Up   |  | 1.38  | 0.65 |      | 1.5   | 0.6       |      | 2.21  | 0.26  |      | Expressed protein                                      |
| Pc_TC048513 | 4.08  | 0.02  | Up   |  | 0     | 1    |      | 2.5   | 0.42      |      | 0.63  | 1     |      | Expressed protein                                      |
| Pc_TC048527 | 0.37  | 0.52  |      |  | 1.01  | 0.12 |      | -2.04 | 0.07      |      | -1.54 | 0.05  | Down | Expressed protein                                      |
| Pc_TC048537 | 0.66  | 0.97  |      |  | 3.31  | 0.04 | Up   | 0.83  | 0.88      |      | 2.08  | 0.3   |      | Expressed protein                                      |
| Pc_TC048549 | 2.65  | 0     | Up   |  | 0     | 0.02 |      | 2.98  | 0.02      | Up   | 1.18  | 0.27  |      | beta-hexosaminidase 2                                  |
| Pc_TC048550 | -0.92 | 0.6   |      |  | -0.94 | 0.62 |      | 2.74  | 0.04      | Up   | 1.35  | 0.24  |      | Expressed protein                                      |
| Pc_TC048557 | -0.57 | 0.74  |      |  | 2.12  | 0.04 | Up   | -1.96 | 0.32      |      | -1.83 | 0.27  |      | Expressed protein                                      |
| Pc_TC048564 | 1.78  | 0.23  |      |  | 2.7   | 0.05 | Up   | 2.26  | 0.19      |      | 2.33  | 0.09  |      | Expressed protein                                      |
| Pc_TC048568 | -0.92 | 0.32  |      |  | -0.33 | 0.77 |      | 1.87  | 0.1       |      | 1.65  | 0.04  | Up   | Expressed protein                                      |
| Pc_TC048586 | 1     | 0.07  |      |  | 0.91  | 0.18 |      | -2.7  | 0.02      | Down | -2.09 | 0.01  | Down | Expressed protein                                      |
| Pc_TC048667 | 0.1   | 0.88  |      |  | -0.02 | 0.99 |      | -2.56 | 0.03      | Down | -0.81 | 0.28  |      | Expressed protein                                      |
| Pc_TC048670 | 1.3   | 0.53  |      |  | 3     | 0.04 | Up   | 1.83  | 0.38      |      | 0.63  | 0.88  |      | Expressed protein                                      |
| Pc_TC048709 | 1.25  | 0.31  |      |  | 3.15  | 0    | Up   | -1.5  | 0.5       |      | -0.05 | 1     |      | Disease resistance RPP8-like protein 3                 |
| Pc_TC048729 | 5.69  | ##### | Up   |  | 0     | 0.67 |      | 4.5   | 0.01      | Up   | 3.43  | 0.02  | Up   | Expressed protein                                      |
| Pc_TC048769 | -0.41 | 0.58  |      |  | -0.14 | 0.88 |      | -3.04 | 0.02      | Down | -2.92 | 0     | Down | Expressed protein                                      |
| Pc_TC048795 | 0.75  | 0.13  |      |  | 0.08  | 0.9  |      | 1.3   | 0.18      |      | 1.5   | 0.02  | Up   | Uncharacterized protein                                |
| Pc_TC048798 | 3.99  | 0     | Up   |  | 0     | 0.67 |      | 1.83  | 0.47      |      | 1.63  | 0.49  |      | Expressed protein                                      |
| Pc_TC048802 | 2.74  | 0.05  | Up   |  | 0     | 0.48 |      | 2.96  | 0.09      |      | -1.96 | 0.63  |      | Expressed protein                                      |
| Pc_TC048807 | -2.42 | 0.1   |      |  | -2.44 | 0.12 |      | 3.05  | 0.01      | Up   | 1.96  | 0.03  | Up   | Expressed protein                                      |
| Pc_TC048822 | -0.26 | 0.64  |      |  | 0.5   | 0.42 |      | -1.78 | 0.1       |      | -2.28 | 0     | Down | Expressed protein                                      |
| Pc_TC048827 | 3.57  | 0     | Up   |  | 0     | 0.36 |      | 2.2   | 0.2       |      | -1.37 | 0.66  |      | Expressed protein                                      |

|             |       |       |      |  |       |           |      |  |       |           |      |       |       |      |                                                         |
|-------------|-------|-------|------|--|-------|-----------|------|--|-------|-----------|------|-------|-------|------|---------------------------------------------------------|
| Pc_TC048830 | -0.18 | 0.92  |      |  | -0.11 | 0.98      |      |  | -0.97 | 0.54      |      | -2.96 | 0.05  | Down | Expressed protein                                       |
| Pc_TC048837 | 0.37  | 0.38  |      |  | 0.91  | 0.07      |      |  | -5.11 | 1.18E-005 | Down | -2.22 | 0     | Down | Putative polyprotein                                    |
| Pc_TC048838 | 2     | 0.05  | Up   |  | 3.02  | 0         | Up   |  | -2.67 | 0.25      |      | -1.96 | 0.29  |      | Expressed protein                                       |
| Pc_TC048859 | 0.15  | 0.83  |      |  | 0.62  | 0.38      |      |  | -2.39 | 0.05      | Down | -1.29 | 0.1   |      | Expressed protein                                       |
| Pc_TC048862 | 1.34  | 0.15  |      |  | 2.01  | 0.04      | Up   |  | -2.4  | 0.19      |      | 0.04  | 1     |      | Expressed protein                                       |
| Pc_TC048889 | 1.78  | 0.23  |      |  | 2.76  | 0.04      | Up   |  | 0     | 0.26      |      | 0.21  | 1     |      | Expressed protein                                       |
| Pc_TC048898 | 3.25  | 0.03  | Up   |  | 0     | 0.67      |      |  | 1.5   | 0.6       |      | 0.63  | 0.96  |      | SecY protein transport family protein                   |
| Pc_TC048908 | 4.1   | ##### | Up   |  | 0     | 0.36      |      |  | 2.83  | 0.08      |      | 1.8   | 0.24  |      | Expressed protein                                       |
| Pc_TC048912 | 0.52  | 0.5   |      |  | 0.17  | 0.88      |      |  | 0     | 0         |      | -2.2  | 0.04  | Down | Uncharacterized protein                                 |
| Pc_TC048934 | -1.54 | 0.01  | Down |  | -6.71 | 4.24E-010 | Down |  | -1.23 | 0.24      |      | -2.82 | 0     | Down | Uncharacterized protein                                 |
| Pc_TC048943 | 0.66  | 0.66  |      |  | 2.31  | 0.04      | Up   |  | -2.5  | 0.3       |      | 0     | 0.06  |      | Quinone reductase family protein                        |
| Pc_TC048966 | 0.23  | 0.87  |      |  | 1.02  | 0.33      |      |  | -3.08 | 0.09      |      | -4.54 | 0.01  | Down | Expressed protein                                       |
| Pc_TC048971 | 0.56  | 0.82  |      |  | 0.91  | 0.65      |      |  | 3.04  | 0.04      | Up   | 2.55  | 0.04  | Up   | Uncharacterized protein                                 |
| Pc_TC048979 | -1.45 | 0.21  |      |  | -0.14 | 0.94      |      |  | -3.44 | 0.05      | Down | -0.65 | 0.57  |      | Expressed protein                                       |
| Pc_TC048999 | 2.6   | 0.04  | Up   |  | 2.15  | 0.15      |      |  | 0.96  | 0.69      |      | 0.95  | 0.64  |      | Expressed protein                                       |
| Pc_TC049020 | -0.66 | 0.58  |      |  | 0.69  | 0.52      |      |  | -3.82 | 0.04      | Down | -2.37 | 0.08  |      | Expressed protein                                       |
| Pc_TC049026 | 2.17  | 0.02  | Up   |  | 1.96  | 0.07      |      |  | -0.96 | 0.62      |      | 2.25  | 0.02  | Up   | Expressed protein                                       |
| Pc_TC049065 | 4.17  | 0.02  | Up   |  | 3.76  | 0.07      |      |  | 2.83  | 0.32      |      | 3.8   | 0.05  |      | Os01g0171800 protein                                    |
| Pc_TC049066 | 0.38  | 0.59  |      |  | 1.41  | 0.05      |      |  | -4.2  | 0         | Down | -2    | 0.03  | Down | Expressed protein                                       |
| Pc_TC049091 | -1.65 | 0     | Down |  | -0.25 | 0.7       |      |  | 0.85  | 0.39      |      | -0.11 | 0.87  |      | glucan synthase-like 10                                 |
| Pc_TC049093 | -4.97 | ##### | Down |  | -0.74 | 0.39      |      |  | 0.06  | 0.97      |      | -0.8  | 0.34  |      | glucan synthase-like 10                                 |
| Pc_TC049094 | -0.64 | 0.39  |      |  | -1.9  | 0.04      | Down |  | 1.49  | 0.17      |      | 0.45  | 0.57  |      | glucan synthase-like 10                                 |
| Pc_TC049103 | 2.11  | 0.02  | Up   |  | 0     | 0.05      |      |  | 1.47  | 0.3       |      | 0.63  | 0.64  |      | tubulin beta-1 chain                                    |
| Pc_TC049106 | -0.3  | 0.88  |      |  | 2.36  | 0.01      | Up   |  | -1.61 | 0.37      |      | -2.08 | 0.19  |      | Expressed protein                                       |
| Pc_TC049122 | 2.64  | 0     | Up   |  | 0     | 0.04      |      |  | 1.24  | 0.39      |      | -0.79 | 0.61  |      | Expressed protein                                       |
| Pc_TC049141 | 0.08  | 1     |      |  | 3.76  | 0.01      | Up   |  | 0     | 0.53      |      | 0     | 0.54  |      | ARP protein (REF)                                       |
| Pc_TC049197 | 0     | 0     |      |  | 0     | 0.01      |      |  | -3.82 | 0.04      | Down | 0     | 0     |      | OSIGBa0076114.9 protein                                 |
| Pc_TC049202 | -0.49 | 0.5   |      |  | 0.74  | 0.32      |      |  | -5.65 | 0         | Down | -4.2  | 0     | Down | Expressed protein                                       |
| Pc_TC049217 | 2.95  | ##### | Up   |  | 0     | 0         |      |  | 2.61  | 0.03      | Up   | 0.72  | 0.47  |      | Expressed protein                                       |
| Pc_TC049223 | 0.61  | 0.55  |      |  | 0.75  | 0.5       |      |  | 2.22  | 0.07      |      | 1.9   | 0.04  | Up   | Expressed protein                                       |
| Pc_TC049231 | -0.86 | 0.43  |      |  | 1.34  | 0.15      |      |  | -2.7  | 0.1       |      | -2.9  | 0.03  | Down | Os10g0317000 protein                                    |
| Pc_TC049247 | 1.16  | 0.33  |      |  | 1.59  | 0.19      |      |  | 2.98  | 0.03      | Up   | 1.78  | 0.11  |      | Expressed protein                                       |
| Pc_TC049254 | 2.13  | 0.05  | Up   |  | 1.25  | 0.38      |      |  | 2.4   | 0.1       |      | 1.57  | 0.21  |      | Expressed protein                                       |
| Pc_TC049265 | -2.74 | ##### | Down |  | -1.63 | 0.01      | Down |  | -4.83 | 4.89E-005 | Down | -5.29 | ##### | Down | light harvesting complex of photosystem II 5            |
| Pc_TC049289 | -1.45 | 0.03  | Down |  | -0.33 | 0.66      |      |  | 0.76  | 0.47      |      | -0.41 | 0.58  |      | Expressed protein                                       |
| Pc_TC049297 | 1.08  | 0.4   |      |  | 2.31  | 0.04      | Up   |  | -0.91 | 0.69      |      | -0.57 | 0.79  |      | Expressed protein                                       |
| Pc_TC049315 | 0.89  | 0.37  |      |  | 1.89  | 0.05      | Up   |  | -1.91 | 0.26      |      | -1.79 | 0.2   |      | Expressed protein                                       |
| Pc_TC049344 | -0.42 | 0.65  |      |  | -0.22 | 0.85      |      |  | -0.83 | 0.53      |      | -2.46 | 0.03  | Down | Expressed protein                                       |
| Pc_TC049363 | 2.86  | 0     | Up   |  | 0     | 0.11      |      |  | 1.36  | 0.39      |      | -0.05 | 1     |      | Serine protease inhibitor (SERPIN) family protein       |
| Pc_TC049364 | 1.72  | 0.02  | Up   |  | 0     | 0         |      |  | 1.68  | 0.15      |      | -0.01 | 1     |      | Expressed protein                                       |
| Pc_TC049370 | 1.08  | 0.65  |      |  | 2.17  | 0.21      |      |  | 0.24  | 1         |      | 3.08  | 0.02  | Up   | Expressed protein                                       |
| Pc_TC049394 | 0.95  | 0.54  |      |  | 1.28  | 0.4       |      |  | 0.62  | 0.79      |      | 2.87  | 0.01  | Up   | Expressed protein                                       |
| Pc_TC049400 | 2.28  | 0.06  |      |  | 2.59  | 0.04      | Up   |  | 1.43  | 0.43      |      | 2     | 0.13  |      | Putative uncharacterized protein Sb05g025655 (Fragment) |
| Pc_TC049420 | 2.17  | 0.11  |      |  | 2.76  | 0.04      | Up   |  | -1.5  | 0.66      |      | 2.75  | 0.03  | Up   | Expressed protein                                       |
| Pc_TC049429 | 1.73  | 0.14  |      |  | 2.06  | 0.09      |      |  | 2.34  | 0.11      |      | 2.82  | 0.01  | Up   | Ubiquitin carboxyl-terminal hydrolase                   |
| Pc_TC049471 | -0.3  | 0.7   |      |  | -2.05 | 0.04      | Down |  | -0.15 | 0.91      |      | -0.6  | 0.5   |      | Expressed protein                                       |
| Pc_TC049480 | 3.78  | 0.01  | Up   |  | 0     | 0.67      |      |  | 2.5   | 0.25      |      | 0.63  | 0.96  |      | Transcriptional coactivator/pterin dehydratase          |
| Pc_TC049489 | 2.89  | 0.23  |      |  | 3.96  | 0.05      | Up   |  | 0     | 0.87      |      | 2.21  | 0.47  |      | cysteine-rich RLK (RECEPTOR-like protein kinase) 8      |
| Pc_TC049498 | -1.41 | 0.33  |      |  | -1.16 | 0.45      |      |  | -4.3  | 0.06      |      | -4.18 | 0.03  | Down | Uncharacterized protein                                 |
| Pc_TC049508 | 0.21  | 0.74  |      |  | 0.84  | 0.22      |      |  | -4.22 | 0         | Down | -2.78 | 0     | Down | Expressed protein                                       |
| Pc_TC049514 | 2.05  | 0.03  | Up   |  | 1.18  | 0.32      |      |  | -1.96 | 0.32      |      | -0.51 | 0.77  |      | Expressed protein                                       |
| Pc_TC049520 | 0.66  | 0.66  |      |  | 2.58  | 0.02      | Up   |  | -1.91 | 0.4       |      | -3.37 | 0.15  |      | Expressed protein                                       |
| Pc_TC049527 | -0.69 | 0.31  |      |  | 0.26  | 0.73      |      |  | -3.11 | 0.01      | Down | -0.81 | 0.31  |      | Expressed protein                                       |
| Pc_TC049533 | 1.79  | 0.12  |      |  | 0     | 0.15      |      |  | 2.92  | 0.04      | Up   | 0.14  | 1     |      | Expressed protein                                       |
| Pc_TC049550 | 0.24  | 0.61  |      |  | 0.22  | 0.7       |      |  | -2.35 | 0.03      | Down | -0.91 | 0.16  |      | Expressed protein                                       |
| Pc_TC049575 | -0.39 | 0.77  |      |  | 0.14  | 0.96      |      |  | -0.67 | 0.68      |      | -2.96 | 0.05  | Down | Expressed protein                                       |
| Pc_TC049612 | 0.08  | 1     |      |  | -0.53 | 1         |      |  | 1.92  | 0.35      |      | 2.99  | 0.03  | Up   | Expressed protein                                       |
| Pc_TC049625 | 0.96  | 0.29  |      |  | 1.88  | 0.04      | Up   |  | 1.52  | 0.23      |      | 2.22  | 0.01  | Up   | Expressed protein                                       |
| Pc_TC049635 | 3.62  | 0     | Up   |  | 0     | 0.48      |      |  | 4.44  | 0         | Up   | 1.36  | 0.5   |      | Expressed protein                                       |
| Pc_TC049639 | -0.58 | 0.63  |      |  | -0.02 | 1         |      |  | -0.22 | 0.91      |      | -3.04 | 0.04  | Down | RAB GTPASE HOMOLOG B18                                  |
| Pc_TC049648 | 0.85  | 0.03  |      |  | 0.95  | 0.05      |      |  | -6.33 | 1.98E-007 | Down | -1.77 | 0     | Down | Uncharacterized protein                                 |
| Pc_TC049658 | 1.8   | 0.05  | Up   |  | 1.26  | 0.26      |      |  | -0.2  | 0.95      |      | 1.51  | 0.15  |      | Uncharacterized protein                                 |



|             |       |       |      |       |           |      |       |           |      |       |       |      |                                                                   |
|-------------|-------|-------|------|-------|-----------|------|-------|-----------|------|-------|-------|------|-------------------------------------------------------------------|
| Pc_TC049661 | 2.5   | 0.01  | Up   | 0     | 0.11      |      | 4.55  | 0         | Up   | -2.37 | 0.25  |      | Expressed protein                                                 |
| Pc_TC049678 | 3.78  | 0.01  | Up   | 0     | 0.67      |      | 2.83  | 0.16      |      | 1.95  | 0.36  |      | Expressed protein                                                 |
| Pc_TC049681 | 0.59  | 0.61  |      | 2.57  | 0.01      | Up   | 0.55  | 0.73      |      | -1.18 | 0.4   |      | ATP synthase D chain,mitochondrial                                |
| Pc_TC049687 | 2.36  | 0.02  | Up   | 1.84  | 0.15      |      | 0.5   | 0.83      |      | 3.23  | 0     | Up   | Expressed protein                                                 |
| Pc_TC049701 | -2.02 | 0.03  | Down | 1.04  | 0.19      |      | -0.88 | 0.48      |      | 0.02  | 1     |      | PDI-like 1-1                                                      |
| Pc_TC049721 | 3.17  | 0.01  | Up   | 0     | 0.36      |      | 1.67  | 0.38      |      | 0.21  | 1     |      | Expressed protein                                                 |
| Pc_TC049722 | 2.34  | 0.01  | Up   | 0     | 0.07      |      | 2.09  | 0.13      |      | -0.37 | 0.86  |      | Sugar isomerase (SIS) family protein                              |
| Pc_TC049723 | 2.82  | 0.04  | Up   | 0     | 0.48      |      | 0.92  | 0.76      |      | -1.96 | 0.63  |      | serine/arginine-rich 22                                           |
| Pc_TC049727 | 1.47  | 0.2   |      | 1.96  | 0.1       |      | 1.26  | 0.43      |      | 2.48  | 0.02  | Up   | Expressed protein                                                 |
| Pc_TC049729 | -1.34 | 0.5   |      | 2.79  | 0.01      | Up   | 0     | 0.08      |      | -2.37 | 0.25  |      | Expressed protein                                                 |
| Pc_TC049731 | -0.42 | 0.76  |      | -2.03 | 0.18      |      | -1.12 | 0.49      |      | -3.46 | 0.03  | Down | Expressed protein                                                 |
| Pc_TC049749 | 2.89  | 0     | Up   | 0     | 0.11      |      | 3.04  | 0.02      | Up   | -0.05 | 1     |      | Inositol monophosphatase family protein                           |
| Pc_TC049766 | 0.49  | 0.41  |      | 0.95  | 0.16      |      | -2.55 | 0.03      | Down | -1.5  | 0.06  |      | Expressed protein                                                 |
| Pc_TC049810 | -0.24 | 0.76  |      | 0.74  | 0.34      |      | -1.97 | 0.12      |      | -2.06 | 0.03  | Down | Expressed protein                                                 |
| Pc_TC049824 | 2.38  | 0.01  | Up   | -2.53 | 0.19      |      | 2.8   | 0.03      | Up   | 0.21  | 0.92  |      | cytochrome P450, family 711, subfamily A, polypeptide 1           |
| Pc_TC049827 | 0.21  | 0.61  |      | 0.7   | 0.16      |      | -5.86 | 1.22E-006 | Down | -2.69 | ##### | Down | Expressed protein                                                 |
| Pc_TC049839 | -1.51 | 0.77  |      | -1.53 | 0.79      |      | 3.59  | 0.03      | Up   | 3.04  | 0.03  | Up   | Expressed protein                                                 |
| Pc_TC049849 | 2.45  | 0.02  | Up   | 0     | 0.2       |      | 1.83  | 0.26      |      | 1.74  | 0.18  |      | Expressed protein                                                 |
| Pc_TC049866 | 0.19  | 0.94  |      | -0.2  | 0.95      |      | 3.05  | 0.02      | Up   | 2.19  | 0.03  | Up   | Expressed protein                                                 |
| Pc_TC049874 | 3.02  | 0     | Up   | 0     | 0.2       |      | 0.73  | 0.73      |      | 0.04  | 1     |      | Expressed protein                                                 |
| Pc_TC049882 | 0.29  | 0.45  |      | 0.05  | 0.91      |      | -2.42 | 0.01      | Down | -1.61 | 0.01  | Down | Expressed protein                                                 |
| Pc_TC049884 | 2.08  | 0.3   |      | 4.15  | 0         | Up   | 1.09  | 0.77      |      | -0.37 | 1     |      | Expressed protein                                                 |
| Pc_TC049898 | 0.53  | 0.29  |      | 1.04  | 0.08      |      | -3.24 | 0         | Down | -1.34 | 0.06  |      | Expressed protein                                                 |
| Pc_TC049901 | 2.54  | 0.05  | Up   | 0     | 0.36      |      | 0.67  | 0.82      |      | 0     | 0.24  |      | Expressed protein                                                 |
| Pc_TC049919 | 1.58  | 0.04  | Up   | 0     | 0         |      | 0.47  | 0.74      |      | -1.09 | 0.35  |      | Expressed protein                                                 |
| Pc_TC049927 | 1.77  | ##### | Up   | 0     | 1.23E-016 |      | 1.29  | 0.16      |      | -0.28 | 0.65  |      | R-protein L3 B                                                    |
| Pc_TC049939 | 0.08  | 1     |      | -2.53 | 0.4       |      | 2.92  | 0.04      | Up   | 2.43  | 0.04  | Up   | Expressed protein                                                 |
| Pc_TC049957 | 4.08  | 0.02  | Up   | 0     | 1         |      | 2.31  | 0.48      |      | 1.63  | 0.71  |      | Expressed protein                                                 |
| Pc_TC049970 | -0.35 | 0.72  |      | 1.48  | 0.08      |      | -1.64 | 0.24      |      | -2.33 | 0.04  | Down | Expressed protein                                                 |
| Pc_TC049995 | -1.59 | 0     | Down | -0.92 | 0.1       |      | -2.35 | 0.02      | Down | -2.7  | ##### | Down | UniRef100                                                         |
| Pc_TC050013 | 3.43  | ##### | Up   | 0     | 0         |      | 2.04  | 0.08      |      | 0.4   | 0.69  |      | pescafillo-related                                                |
| Pc_TC050033 | -3.92 | 0.03  | Down | -1.13 | 0.44      |      | -1.04 | 0.53      |      | -1.2  | 0.37  |      | Expressed protein                                                 |
| Pc_TC050048 | 2.08  | 0.01  | Up   | 1.8   | 0.07      |      | 1.32  | 0.33      |      | 2.16  | 0.02  | Up   | Expressed protein                                                 |
| Pc_TC050107 | -0.92 | 0.46  |      | 0.89  | 0.4       |      | -3.67 | 0.06      |      | -3.54 | 0.03  | Down | Expressed protein                                                 |
| Pc_TC050117 | 2.3   | 0.13  |      | 3.12  | 0.03      | Up   | -0.5  | 0.99      |      | 1.36  | 0.5   |      | Expressed protein                                                 |
| Pc_TC050139 | 0.92  | 0.19  |      | 0.18  | 0.86      |      | -2.15 | 0.11      |      | -2.25 | 0.03  | Down | Expressed protein                                                 |
| Pc_TC050143 | 1     | 0.42  |      | 2.53  | 0.02      | Up   | -1.34 | 0.52      |      | 0.26  | 0.92  |      | putative, Ty1-copia subclass                                      |
| Pc_TC050151 | 2.66  | 0.03  | Up   | 3.1   | 0.02      | Up   | 0.83  | 0.75      |      | 1.43  | 0.39  |      | Expressed protein                                                 |
| Pc_TC050159 | 3.28  | ##### | Up   | 0     | 0.07      |      | 2.52  | 0.06      |      | 1     | 0.42  |      | Os01g0146700 protein                                              |
| Pc_TC050160 | 0.79  | 0.23  |      | 0.86  | 0.27      |      | -1.52 | 0.22      |      | -1.98 | 0.03  | Down | Expressed protein                                                 |
| Pc_TC050171 | 2.33  | 0.01  | Up   | 0     | 0.03      |      | -0.03 | 1         |      | 0.09  | 1     |      | proteasome alpha subunit D2                                       |
| Pc_TC050173 | -1.51 | 0.24  |      | -0.79 | 0.56      |      | -2.08 | 0.21      |      | -3.54 | 0.03  | Down | Expressed protein                                                 |
| Pc_TC050178 | 3.43  | ##### | Up   | 0     | 0.07      |      | 2.27  | 0.1       |      | 1     | 0.42  |      | Expressed protein                                                 |
| Pc_TC050193 | 1.86  | 0.01  | Up   | 0     | 0         |      | 2.68  | 0.02      | Up   | 0.77  | 0.43  |      | NAD(P)-linked oxidoreductase superfamily protein                  |
| Pc_TC050211 | -0.24 | 0.95  |      | 2.76  | 0.01      | Up   | -0.23 | 0.95      |      | 0.55  | 0.71  |      | Ribosomal protein L18e/L15 superfamily protein                    |
| Pc_TC050239 | 2.89  | 0.02  | Up   | 0     | 0.36      |      | 3.09  | 0.05      | Up   | 1.87  | 0.21  |      | Expressed protein                                                 |
| Pc_TC050241 | 0.89  | 0.52  |      | 2.27  | 0.04      | Up   | 0.83  | 0.64      |      | -0.57 | 0.79  |      | Ribosomal protein L7Ae/L30e/S12e/Gadd45 family protein            |
| Pc_TC050243 | 0.82  | 0.63  |      | 1.93  | 0.14      |      | 0.62  | 0.79      |      | 2.53  | 0.03  | Up   | Expressed protein                                                 |
| Pc_TC050256 | 0.4   | 0.85  |      | 2.42  | 0.03      | Up   | -0.91 | 0.69      |      | -0.05 | 1     |      | Expressed protein                                                 |
| Pc_TC050278 | 0.4   | 0.32  |      | 1.09  | 0.03      | Up   | -1.56 | 0.11      |      | -0.32 | 0.58  |      | Expressed protein                                                 |
| Pc_TC050285 | 0.56  | 0.21  |      | 0.98  | 0.07      |      | -2.41 | 0.02      | Down | -0.58 | 0.36  |      | Expressed protein                                                 |
| Pc_TC050294 | 0.25  | 0.74  |      | -1.96 | 0.04      | Down | 0.31  | 0.79      |      | -0.75 | 0.38  |      | Expressed protein                                                 |
| Pc_TC050300 | 1.79  | 0.04  | Up   | 1.06  | 0.33      |      | -4.4  | 0.05      | Down | 1.39  | 0.17  |      | Uncharacterized protein                                           |
| Pc_TC050304 | 0.66  | 0.72  |      | 0.06  | 1         |      | 3.36  | 0.02      | Up   | 1.63  | 0.22  |      | Expressed protein                                                 |
| Pc_TC050306 | 0.09  | 0.81  |      | 0.32  | 0.52      |      | -2.88 | 0         | Down | -1.81 | 0     | Down | Haloacid dehalogenase-like hydrolase (HAD) superfamily protein    |
| Pc_TC050313 | -0.27 | 0.66  |      | 0.21  | 0.76      |      | -2.34 | 0.04      | Down | 0.79  | 0.24  |      | Serine protease inhibitor, potato inhibitor I-type family protein |
| Pc_TC050320 | 1.96  | ##### | Up   | 0     | 4.89E-010 |      | 1.58  | 0.11      |      | 0.03  | 0.98  |      | Major facilitator superfamily protein                             |
| Pc_TC050322 | 3.47  | 0.02  | Up   | 0     | 0.67      |      | 2.31  | 0.3       |      | -0.37 | 1     |      | Uncharacterized protein                                           |
| Pc_TC050324 | 3.4   | 0.02  | Up   | 0     | 0.67      |      | 1.83  | 0.47      |      | 1.21  | 0.69  |      | uncharacterized protein                                           |
| Pc_TC050328 | 2.08  | 0.3   |      | 3.58  | 0.02      | Up   | 0.5   | 1         |      | 2.87  | 0.09  |      | Expressed protein                                                 |
| Pc_TC050337 | 0.86  | 0.06  |      | 1.08  | 0.05      |      | -3.72 | 0         | Down | -1.67 | 0.01  | Down | Expressed protein                                                 |
| Pc_TC050344 | 0.02  | 0.98  |      | 0.36  | 0.58      |      | -2.88 | 0.01      | Down | -1.33 | 0.07  |      | Uncharacterized protein                                           |

|             |       |       |      |       |      |      |       |           |       |       |      |                                |                                                                            |      |
|-------------|-------|-------|------|-------|------|------|-------|-----------|-------|-------|------|--------------------------------|----------------------------------------------------------------------------|------|
| Pc_TC050367 | 2.38  | 0     | Up   | 0     | 0.02 |      | 1.78  | 0.18      | -0.48 | 0.75  |      | Uncharacterized protein        |                                                                            |      |
| Pc_TC050372 | 3.61  | ##### | Up   | 0     | 0.15 |      | 2.37  | 0.1       | 0.82  | 0.6   |      | AAA-type ATPase family protein |                                                                            |      |
| Pc_TC050424 | 2.72  | 0.03  | Up   | 0     | 0.36 |      | 2.75  | 0.09      | 0.95  | 0.64  |      | Expressed protein              |                                                                            |      |
| Pc_TC050431 | 0.08  | 1     |      | 0.82  | 0.55 |      | 3.06  | 0.02      | Up    | 2.16  | 0.04 | Up                             | Expressed protein                                                          |      |
| Pc_TC050433 | 3.99  | 0.03  | Up   | 3.38  | 0.14 |      | 3.96  | 0.08      |       | 3.53  | 0.09 |                                | Expressed protein                                                          |      |
| Pc_TC050448 | -0.4  | 0.72  |      | -0.42 | 0.74 |      | -3.56 | 0.04      | Down  | -1.43 | 0.21 |                                | Uncharacterized protein                                                    |      |
| Pc_TC050452 | 1.63  | 0.02  | Up   | 0     | 0    |      | 2     | 0.08      |       | -0.7  | 0.51 |                                | aminopeptidase M1                                                          |      |
| Pc_TC050499 | 2.8   | 0     | Up   | 0     | 0.07 |      | 1.8   | 0.2       |       | 0.3   | 0.88 |                                | NAD(P)-linked oxidoreductase superfamily protein                           |      |
| Pc_TC050509 | 0.79  | 0.46  |      | 0.5   | 0.71 |      | 3.48  | 0         | Up    | 2.34  | 0.01 | Up                             | Expressed protein                                                          |      |
| Pc_TC050513 | -0.12 | 0.79  |      | -0.87 | 0.11 |      | 2.08  | 0.02      | Up    | 1.28  | 0.02 | Up                             | Expressed protein                                                          |      |
| Pc_TC050520 | 0.44  | 0.36  |      | 1.45  | 0.01 | Up   | -4.9  | 6.52E-005 | Down  | -2.42 | 0    | Down                           | Expressed protein                                                          |      |
| Pc_TC050537 | -1.29 | 0.03  | Down | -1.65 | 0.02 | Down | -0.77 | 0.46      |       | -0.61 | 0.37 |                                | Ribonuclease H-like superfamily protein                                    |      |
| Pc_TC050556 | 0.08  | 1     |      | 0.64  | 0.98 |      | 4.53  | 0.01      | Up    | 2.95  | 0.08 |                                | Expressed protein                                                          |      |
| Pc_TC050567 | 3.29  | 0     | Up   | 0     | 0.11 |      | 2.55  | 0.07      |       | 2.21  | 0.05 | Up                             | electron transfer flavoprotein beta                                        |      |
| Pc_TC050579 | -4.17 | 0.02  | Down | -3.19 | 0.05 |      | 0     | 0.01      |       | 0     | 0    |                                | heat shock protein 81-2                                                    |      |
| Pc_TC050588 | 0.78  | 0.59  |      | 2.31  | 0.04 | Up   | -1.91 | 0.4       |       | -0.2  | 0.98 |                                | Expressed protein                                                          |      |
| Pc_TC050605 | 2.95  | 0.03  | Up   | 2.87  | 0.05 |      | -0.08 | 1         |       | 0.04  | 1    |                                | Expressed protein                                                          |      |
| Pc_TC050618 | 0.19  | 0.87  |      | -1.2  | 0.32 |      | 2.93  | 0.01      | Up    | 2.07  | 0.01 | Up                             | Expressed protein                                                          |      |
| Pc_TC050628 | 3.63  | ##### | Up   | 0     | 0.05 |      | 3.27  | 0.01      | Up    | 1.3   | 0.25 |                                | Glucose-methanol-choline (GMC) oxidoreductase family protein               |      |
| Pc_TC050638 | 0.08  | 1     |      | 1.64  | 0.53 |      | -1.5  | 0.85      |       | 3.21  | 0.04 | Up                             | Expressed protein                                                          |      |
| Pc_TC050657 | 0.47  | 0.22  |      | 0.7   | 0.14 |      | -2.29 | 0.02      | Down  | -0.74 | 0.19 |                                | Expressed protein                                                          |      |
| Pc_TC050665 | 0.87  | 0.39  |      | 1.96  | 0.04 | Up   | 0.55  | 0.72      |       | -0.11 | 0.98 |                                | Expressed protein                                                          |      |
| Pc_TC050670 | 2.11  | 0.02  | Up   | 0     | 0.03 |      | 1.87  | 0.16      |       | 0.32  | 0.84 |                                | aminopeptidase M1                                                          |      |
| Pc_TC050673 | -1.92 | 0.36  |      | -1.94 | 0.4  |      | 3.36  | 0.01      | Up    | 1.33  | 0.29 |                                | Expressed protein                                                          |      |
| Pc_TC050674 | -0.09 | 1     |      | 0.84  | 0.43 |      | -4.67 | 0.03      | Down  | -0.74 | 0.56 |                                | Expressed protein                                                          |      |
| Pc_TC050678 | 0.75  | 0.09  |      | 0.28  | 0.62 |      | -3.54 | 0         | Down  | -0.66 | 0.3  |                                | Expressed protein                                                          |      |
| Pc_TC050708 | 1.38  | 0.03  | Up   | 0.86  | 0.28 |      | -2.85 | 0.04      | Down  | -0.02 | 1    |                                | Expressed protein                                                          |      |
| Pc_TC050715 | 2.82  | 0.04  | Up   | 2.06  | 0.24 |      | 2.01  | 0.32      |       | 2.5   | 0.1  |                                | Expressed protein                                                          |      |
| Pc_TC050732 | 0.18  | 0.71  |      | 0.34  | 0.56 |      | -2.7  | 0.01      | Down  | -2.2  | 0    | Down                           | Expressed protein                                                          |      |
| Pc_TC050740 | 0     | 0.01  |      | 0     | 0.01 |      | -4.67 | 0.03      | Down  | 0     | 0    |                                | ATP synthase subunit 1                                                     |      |
| Pc_TC050742 | 2.36  | 0.02  | Up   | 0     | 0.11 |      | 1.5   | 0.33      |       | 0.95  | 0.49 |                                | Expressed protein                                                          | bZIP |
| Pc_TC050744 | -0.3  | 0.88  |      | 2.22  | 0.02 | Up   | 0.56  | 0.73      |       | -1.27 | 0.39 |                                | Ribosomal protein S14p/S29e family protein                                 |      |
| Pc_TC050747 | 5.5   | ##### | Up   | 0     | 0.11 |      | 2.12  | 0.14      |       | -0.37 | 0.89 |                                | Expressed protein                                                          |      |
| Pc_TC050750 | 3.25  | 0.03  | Up   | 1.06  | 0.8  |      | -0.5  | 1         |       | 1.21  | 0.69 |                                | Expressed protein                                                          |      |
| Pc_TC050764 | -1.24 | 0.3   |      | -3.26 | 0.05 | Down | 0.57  | 0.68      |       | -0.45 | 0.72 |                                | Expressed protein                                                          |      |
| Pc_TC050768 | -1.51 | 0.54  |      | 2.6   | 0.03 | Up   | 0.38  | 0.91      |       | 0     | 0.11 |                                | Ribosomal protein S8e family protein                                       |      |
| Pc_TC050771 | 1.89  | 0.38  |      | 3.38  | 0.04 | Up   | 0     | 0.53      |       | -1.37 | 0.88 |                                | Uncharacterized protein                                                    |      |
| Pc_TC050772 | -1.09 | 0.2   |      | -1.11 | 0.26 |      | -2.82 | 0.04      | Down  | -2.06 | 0.04 | Down                           | Expressed protein                                                          |      |
| Pc_TC050801 | -3.83 | 0.04  | Down | -3.85 | 0.06 |      | 0.12  | 0.98      |       | -0.19 | 0.93 |                                | Expressed protein                                                          |      |
| Pc_TC050813 | -1.24 | 0.12  |      | -2.04 | 0.04 | Down | -0.62 | 0.6       |       | -0.15 | 0.87 |                                | Expressed protein                                                          |      |
| Pc_TC050828 | 2.4   | 0.4   |      | 4.64  | 0.01 | Up   | 0     | 0.87      |       | 0     | 0.9  |                                | Expressed protein                                                          |      |
| Pc_TC050844 | 0.08  | 1     |      | 3.15  | 0.06 |      | 1.09  | 0.77      |       | 3.33  | 0.03 | Up                             | Expressed protein                                                          |      |
| Pc_TC050877 | 0.55  | 0.19  |      | 0.79  | 0.12 |      | -2.55 | 0.01      | Down  | -0.55 | 0.36 |                                | RNA-directed DNA polymerase (reverse transcriptase)-related family protein |      |
| Pc_TC050882 | -2.21 | 0.02  | Down | -0.65 | 0.5  |      | 1.98  | 0.08      |       | 0.36  | 0.69 |                                | Expressed protein                                                          |      |
| Pc_TC050910 | -0.13 | 0.84  |      | 0.09  | 0.91 |      | -6.38 | 4.44E-005 | Down  | -3.45 | 0    | Down                           | Expressed protein                                                          |      |
| Pc_TC050916 | 2.66  | 0.02  | Up   | 0.32  | 0.97 |      | -0.5  | 0.91      |       | 3.03  | 0.01 | Up                             | Expressed protein                                                          |      |
| Pc_TC050920 | -1.56 | 0.04  | Down | -0.53 | 0.51 |      | -0.57 | 0.62      |       | -0.2  | 0.81 |                                | Expressed protein                                                          |      |
| Pc_TC050936 | 0.25  | 0.72  |      | 0.62  | 0.42 |      | -2.21 | 0.08      |       | -2.15 | 0.02 | Down                           | Expressed protein                                                          |      |
| Pc_TC050950 | 2.33  | 0.02  | Up   | 0     | 0.11 |      | 3.06  | 0.02      | Up    | 1.43  | 0.25 |                                | Expressed protein                                                          |      |
| Pc_TC050953 | 0.19  | 0.94  |      | 0.75  | 0.55 |      | 3.8   | 0         | Up    | 2.09  | 0.03 | Up                             | Expressed protein                                                          |      |
| Pc_TC050969 | 1.66  | 0.48  |      | 3.76  | 0.01 | Up   | 0.83  | 0.88      |       | 2.08  | 0.3  |                                | Expressed protein                                                          |      |
| Pc_TC050973 | 0.6   | 0.08  |      | 0.66  | 0.14 |      | -2.78 | 0         | Down  | -1.4  | 0.01 | Down                           | Expressed protein                                                          |      |
| Pc_TC050985 | 3.7   | ##### | Up   | 0     | 0.2  |      | 2.01  | 0.2       |       | 0.74  | 0.67 |                                | Rad23 UV excision repair protein family                                    |      |
| Pc_TC050998 | 3.54  | 0.01  | Up   | 0.06  | 1    |      | 3.36  | 0.07      |       | 0.63  | 0.96 |                                | Expressed protein                                                          |      |
| Pc_TC051003 | -1.48 | 0.02  | Down | -1.65 | 0.02 | Down | 1.25  | 0.21      |       | -0.11 | 0.88 |                                | Expressed protein                                                          |      |
| Pc_TC051013 | 0.49  | 0.76  |      | 2.17  | 0.05 | Up   | -0.08 | 1         |       | 0.26  | 0.92 |                                | Expressed protein                                                          |      |
| Pc_TC051039 | 1.08  | 0.31  |      | 2.85  | 0    | Up   | -1.08 | 0.56      |       | 1.33  | 0.22 |                                | Expressed protein                                                          |      |
| Pc_TC051075 | 2.76  | 0     | Up   | 0     | 0.15 |      | 1.65  | 0.29      |       | -0.01 | 1    |                                | thioredoxin family protein                                                 |      |
| Pc_TC051089 | 2.27  | 0     | Up   | 0     | 0.02 |      | 1.43  | 0.28      |       | -0.2  | 0.91 |                                | SGS domain-containing protein                                              |      |
| Pc_TC051107 | -2.55 | 0.02  | Down | -0.81 | 0.46 |      | 0.46  | 0.73      |       | -0.28 | 0.8  |                                | Expressed protein                                                          |      |
| Pc_TC051116 | 2.6   | 0.04  | Up   | 1.87  | 0.24 |      | 3.2   | 0.04      | Up    | 2.83  | 0.03 | Up                             | Expressed protein                                                          |      |
| Pc_TC051159 | 2.6   | 0.04  | Up   | 0     | 0.36 |      | 2.36  | 0.16      |       | -0.37 | 0.99 |                                | Expressed protein                                                          |      |

|             |       |       |      |       |           |      |       |           |      |       |      |      |                                                               |       |
|-------------|-------|-------|------|-------|-----------|------|-------|-----------|------|-------|------|------|---------------------------------------------------------------|-------|
| Pc_TC051193 | 2.25  | 0.24  |      | 3.31  | 0.04      | Up   | 0     | 0.53      |      | -0.37 | 1    |      | Expressed protein                                             |       |
| Pc_TC051196 | 0     | 0.64  |      | -0.94 | 1         |      | 3.86  | 0.03      | Up   | 0.21  | 1    |      | Expressed protein                                             |       |
| Pc_TC051210 | 2.05  | 0.02  | Up   | 0     | 0.04      |      | 0.83  | 0.59      |      | 0.43  | 0.76 |      | AICARFT/IMPChase bienzyme family protein                      |       |
| Pc_TC051219 | 3.08  | 0.05  | Up   | 2.23  | 0.29      |      | 2.96  | 0.14      |      | 3.91  | 0.01 | Up   | Expressed protein                                             |       |
| Pc_TC051228 | 0.39  | 0.47  |      | 1.1   | 0.07      |      | -2.54 | 0.03      | Down | -1.06 | 0.14 |      | Expressed protein                                             |       |
| Pc_TC051263 | 0.52  | 0.66  |      | 0.77  | 0.52      |      | 2.58  | 0.04      | Up   | 2.12  | 0.03 | Up   | Expressed protein                                             |       |
| Pc_TC051281 | 0.26  | 0.68  |      | 0.73  | 0.29      |      | -2.99 | 0.02      | Down | -2.95 | 0    | Down | Expressed protein                                             |       |
| Pc_TC051293 | 1.9   | 0.03  | Up   | 0.75  | 0.55      |      | 0.93  | 0.53      |      | 1.05  | 0.34 |      | Putative neuropeptide precursor protein                       |       |
| Pc_TC051294 | 2.78  | 0.1   |      | 0     | 0.67      |      | 3.59  | 0.05      | Up   | 2.53  | 0.16 |      | Expressed protein                                             |       |
| Pc_TC051308 | 1.26  | 0.23  |      | 2.02  | 0.05      |      | 2.6   | 0.05      | Up   | 2.36  | 0.02 | Up   | Leucine-rich repeat protein kinase family protein             |       |
| Pc_TC051318 | 2.66  | 0.03  | Up   | 0     | 0.36      |      | 0.09  | 1         |      | 0     | 0.24 |      | Ankyrin repeat family protein                                 |       |
| Pc_TC051328 | -0.42 | 0.67  |      | -2.57 | 0.04      | Down | 1.79  | 0.12      |      | 0.82  | 0.36 |      | Expressed protein                                             |       |
| Pc_TC051330 | 1.89  | 0.03  | Up   | 0.77  | 0.52      |      | 0.34  | 0.85      |      | 0.07  | 1    |      | Uncharacterized protein                                       |       |
| Pc_TC051349 | 0.71  | 0.37  |      | 1.24  | 0.14      |      | -3.54 | 0.03      | Down | -2.61 | 0.02 | Down | Expressed protein                                             |       |
| Pc_TC051353 | -0.13 | 0.81  |      | 0.05  | 0.94      |      | -2.45 | 0.03      | Down | -0.98 | 0.15 |      | Uncharacterized protein                                       |       |
| Pc_TC051354 | 0.51  | 0.31  |      | 0.8   | 0.18      |      | -2.71 | 0.01      | Down | -0.82 | 0.23 |      | Expressed protein                                             |       |
| Pc_TC051366 | -1.34 | 0.5   |      | 3.31  | 0         | Up   | 0     | 0.08      |      | 0     | 0.06 |      | 12-oxophytodienoate reductase 1                               |       |
| Pc_TC051376 | 4.6   | 0     | Up   | 0     | 0.67      |      | 2.41  | 0.27      |      | 2.21  | 0.26 |      | Expressed protein                                             |       |
| Pc_TC051382 | -0.74 | 0.5   |      | 1.53  | 0.09      |      | -1.44 | 0.34      |      | -2.9  | 0.03 | Down | Expressed protein                                             |       |
| Pc_TC051388 | 1.4   | 0.4   |      | 0.38  | 0.97      |      | 3.28  | 0.03      | Up   | 2.53  | 0.06 |      | Expressed protein                                             |       |
| Pc_TC051404 | 0.54  | 0.23  |      | 1     | 0.06      |      | -5.43 | 1.18E-005 | Down | -2.35 | 0    | Down | Expressed protein                                             |       |
| Pc_TC051405 | -0.26 | 0.82  |      | 1.49  | 0.08      |      | -3.35 | 0.04      | Down | -2.43 | 0.04 | Down | Os01g0286100 protein                                          |       |
| Pc_TC051410 | 0.08  | 1     |      | 0     | 0.48      |      | 3.53  | 0.03      | Up   | 0.36  | 1    |      | Expressed protein                                             |       |
| Pc_TC051460 | -0.31 | 0.68  |      | -1.94 | 0.04      | Down | -0.83 | 0.48      |      | -0.31 | 0.71 |      | Expressed protein                                             |       |
| Pc_TC051461 | -2.23 | 0.01  | Down | -2.79 | 0         | Down | 0.06  | 0.97      |      | -1.15 | 0.16 |      | Putative uncharacterized protein OJ1136 C11.12                |       |
| Pc_TC051483 | 1.49  | 0.1   |      | 2.28  | 0.01      | Up   | -0.32 | 0.87      |      | 0.53  | 0.67 |      | Expressed protein                                             |       |
| Pc_TC051518 | -0.41 | 0.8   |      | -0.05 | 1         |      | -1.3  | 0.45      |      | -4.18 | 0.03 | Down | OO Ba0005L10-OO Ba0081K17.19 protein                          |       |
| Pc_TC051542 | -0.39 | 0.7   |      | -0.71 | 0.52      |      | -0.27 | 0.86      |      | -2.91 | 0.02 | Down | Expressed protein                                             |       |
| Pc_TC051543 | 0.35  | 0.54  |      | 0.71  | 0.28      |      | -2.37 | 0.04      | Down | -1.06 | 0.15 |      | UniRef100                                                     |       |
| Pc_TC051567 | -0.68 | 0.16  |      | -1.27 | 0.04      | Down | 1.14  | 0.22      |      | 0.14  | 0.82 |      | Uncharacterized protein                                       |       |
| Pc_TC051580 | 0.96  | 0.36  |      | 2     | 0.05      | Up   | -3.2  | 0.12      |      | -4.08 | 0.04 | Down | Expressed protein                                             |       |
| Pc_TC051606 | 0.08  | 1     |      | 0.47  | 0.86      |      | 2.78  | 0.06      |      | 2.53  | 0.03 | Up   | Expressed protein                                             |       |
| Pc_TC051609 | 0.34  | 0.65  |      | 1.2   | 0.12      |      | 0     | 0         |      | -5.02 | 0    | Down | Expressed protein                                             |       |
| Pc_TC051611 | 0     | 0.31  |      | 0.06  | 1         |      | 3.71  | 0.01      | Up   | 1.8   | 0.24 |      | Expressed protein                                             |       |
| Pc_TC051622 | 3.33  | 0.03  | Up   | 0     | 0.67      |      | 1.5   | 0.6       |      | 0     | 0.54 |      | Expressed protein                                             |       |
| Pc_TC051625 | 1.02  | 0.34  |      | 2.17  | 0.03      | Up   | 0     | 0.03      |      | -2.96 | 0.1  |      | Expressed protein                                             |       |
| Pc_TC051632 | 1.66  | 0.16  |      | 2.57  | 0.02      | Up   | 4.02  | 0         | Up   | 2.86  | 0.01 | Up   | gag protein                                                   |       |
| Pc_TC051634 | 2.66  | 0.03  | Up   | -0.94 | 0.84      |      | 1.41  | 0.49      |      | 1.33  | 0.44 |      | Expressed protein                                             |       |
| Pc_TC051657 | -0.24 | 0.9   |      | 0.32  | 0.83      |      | -4.4  | 0.05      | Down | -2.7  | 0.09 |      | serine carboxypeptidase-like 23                               |       |
| Pc_TC051680 | 1.5   | 0.04  | Up   | 0.98  | 0.28      |      | -0.35 | 0.81      |      | 0.6   | 0.53 |      | Expressed protein                                             |       |
| Pc_TC051683 | -0.69 | 0.59  |      | 0.67  | 0.56      |      | 0     | 0.01      |      | -3.46 | 0.03 | Down | Expressed protein                                             |       |
| Pc_TC051688 | 0     | 1     |      | 3.52  | 0.11      |      | 3.2   | 0.21      |      | 3.87  | 0.04 | Up   | Alpha-amylase isozyme 3B                                      |       |
| Pc_TC051695 | 3.41  | ##### | Up   | 0     | 0         |      | 2.74  | 0.02      | Up   | 1.69  | 0.06 |      | Expressed protein                                             |       |
| Pc_TC051716 | 1.08  | 0.77  |      | 4.15  | 0         | Up   | 3.2   | 0.09      |      | 3.02  | 0.07 |      | Expressed protein                                             |       |
| Pc_TC051736 | 2.92  | 0     | Up   | 0     | 0.15      |      | 3.19  | 0.02      | Up   | 0     | 0.08 |      | Inositol monophosphatase family protein                       |       |
| Pc_TC051746 | 2.15  | ##### | Up   | 0     | 5.37E-017 |      | 2.29  | 0.01      | Up   | 1.32  | 0.02 | Up   | Expressed protein                                             |       |
| Pc_TC051752 | -0.07 | 0.91  |      | 0.34  | 0.61      |      | 1.86  | 0.06      |      | 1.42  | 0.03 | Up   | Uncharacterized protein                                       |       |
| Pc_TC051759 | 2.71  | 0     | Up   | 0     | 0.02      |      | 1.45  | 0.28      |      | 1.21  | 0.25 |      | Expressed protein                                             |       |
| Pc_TC051774 | -0.51 | 0.69  |      | -2.11 | 0.16      |      | -0.58 | 0.72      |      | -2.96 | 0.05 | Down | Expressed protein                                             |       |
| Pc_TC051780 | -3.92 | 0.03  | Down | -2.94 | 0.09      |      | 0     | 0.01      |      | 0     | 0.01 |      | Mitochondrial substrate carrier family protein                |       |
| Pc_TC051782 | 1.64  | 0.05  | Up   | 0     | 0.01      |      | 1.17  | 0.38      |      | -0.64 | 0.62 |      | Expressed protein                                             |       |
| Pc_TC051787 | 0.04  | 0.9   |      | 0.09  | 0.82      |      | -1.93 | 0.03      | Down | -1.07 | 0.03 | Down | Expressed protein                                             |       |
| Pc_TC051794 | -3.92 | 0.03  | Down | -1.13 | 0.44      |      | 0.03  | 1         |      | 0.53  | 0.65 |      | Expressed protein                                             |       |
| Pc_TC051798 | 0.08  | 1     |      | 1.59  | 0.09      |      | -3.74 | 0.05      | Down | -1.45 | 0.25 |      | Expressed protein                                             |       |
| Pc_TC051800 | 2.18  | 0.04  | Up   | 0     | 0.15      |      | 0.78  | 0.68      |      | -0.6  | 0.8  |      | OSJNBa0067G20.11 protein                                      |       |
| Pc_TC051805 | -1.64 | 0.07  |      | -2.3  | 0.03      | Down | 0.53  | 0.65      |      | -0.31 | 0.74 |      | Mitochondrial transcription termination factor family protein | mTERF |
| Pc_TC051809 | 2.36  | 0     | Up   | 2.8   | 0         | Up   | 1.59  | 0.22      |      | 1.83  | 0.05 |      | Expressed protein                                             |       |
| Pc_TC051824 | 0.99  | 0.45  |      | 2.38  | 0.03      | Up   | -0.91 | 0.69      |      | -0.37 | 0.89 |      | Expressed protein                                             |       |
| Pc_TC051853 | 2.62  | 0     | Up   | 0     | 0.04      |      | 2.67  | 0.04      | Up   | 1.5   | 0.16 |      | triosephosphate isomerase                                     |       |
| Pc_TC051869 | 3.14  | ##### | Up   | 0     | 0.02      |      | 2.72  | 0.03      | Up   | 0.63  | 0.58 |      | Putative uncharacterized protein                              |       |
| Pc_TC051888 | -1.14 | 0.61  |      | 0.25  | 0.97      |      | 4.75  | 0         | Up   | 2.43  | 0.03 | Up   | Expressed protein                                             |       |
| Pc_TC051891 | 0.49  | 0.83  |      | 0.64  | 0.76      |      | 1.78  | 0.27      |      | 2.43  | 0.04 | Up   | Expressed protein                                             |       |

|             |       |       |      |       |           |      |       |           |      |       |       |      |                                                                                            |
|-------------|-------|-------|------|-------|-----------|------|-------|-----------|------|-------|-------|------|--------------------------------------------------------------------------------------------|
| Pc_TC051906 | 3.15  | 0     | Up   | 0     | 0.27      |      | 2.94  | 0.05      |      | 1.47  | 0.32  |      | Expressed protein                                                                          |
| Pc_TC051930 | 2.08  | 0.3   |      | 1.38  | 0.65      |      | 3.63  | 0.05      | Up   | 2.43  | 0.19  |      | Expressed protein                                                                          |
| Pc_TC051976 | -3.62 | 0.01  | Down | -4.64 | 0.01      | Down | 0.05  | 1         |      | -1.91 | 0.11  |      | Expressed protein                                                                          |
| Pc_TC051977 | -0.92 | 0.83  |      | 2.76  | 0.04      | Up   | 0     | 0.26      |      | 0     | 0.24  |      | Uncharacterized protein                                                                    |
| Pc_TC052006 | 3.12  | 0.01  | Up   | 0     | 0.36      |      | 2.63  | 0.11      |      | 0.63  | 0.82  |      | 10-formyltetrahydrofolate synthetase                                                       |
| Pc_TC052011 | 0.24  | 0.64  |      | 1.11  | 0.05      |      | -5.25 | 3.82E-005 | Down | -2.36 | 0     | Down | Expressed protein                                                                          |
| Pc_TC052044 | -0.51 | 0.41  |      | -0.26 | 0.72      |      | -2.32 | 0.04      | Down | -1.48 | 0.05  |      | Expressed protein                                                                          |
| Pc_TC052054 | 0.66  | 0.53  |      | 2.15  | 0.02      | Up   | -3.5  | 0.08      |      | -0.57 | 0.68  |      | B1234D02.10 protein                                                                        |
| Pc_TC052059 | 3.29  | ##### | Up   | 0     | 0.05      |      | 2.38  | 0.07      |      | 0.69  | 0.6   |      | Expressed protein                                                                          |
| Pc_TC052088 | 0.27  | 0.66  |      | 0.99  | 0.14      |      | -2.01 | 0.08      |      | -2.53 | 0     | Down | Expressed protein                                                                          |
| Pc_TC052110 | 1.08  | 0.04  | Up   | 2.8   | 1.02E-006 | Up   | -4.27 | 0         | Down | -1.08 | 0.14  |      | early nodulin-like protein 9                                                               |
| Pc_TC052112 | 0.53  | 0.22  |      | 0.73  | 0.17      |      | -2.73 | 0.01      | Down | -1.26 | 0.05  | Down | Expressed protein                                                                          |
| Pc_TC052115 | 0.49  | 0.64  |      | 0.7   | 0.53      |      | -3.67 | 0.06      |      | -2.96 | 0.05  | Down | Expressed protein                                                                          |
| Pc_TC052124 | 0.89  | 0.68  |      | 2.96  | 0.02      | Up   | -1.5  | 0.66      |      | 1.21  | 0.5   |      | Expressed protein                                                                          |
| Pc_TC052127 | 1.72  | 0.1   |      | 1.93  | 0.09      |      | 1.03  | 0.52      |      | 2.21  | 0.04  | Up   | Expressed protein                                                                          |
| Pc_TC052144 | 0.2   | 0.6   |      | 1.25  | 0.01      | Up   | -4.22 | 7.28E-005 | Down | -1.55 | 0.01  | Down | Expressed protein                                                                          |
| Pc_TC052149 | -0.92 | 0.65  |      | 0.64  | 0.71      |      | 1.26  | 0.43      |      | 2.46  | 0.02  | Up   | Expressed protein                                                                          |
| Pc_TC052163 | 0.55  | 0.45  |      | 1.63  | 0.03      | Up   | -5.11 | 0         | Down | -4.4  | 0     | Down | Expressed protein                                                                          |
| Pc_TC052205 | 3.33  | 0.03  | Up   | 1.38  | 0.65      |      | 2.09  | 0.38      |      | 2.08  | 0.3   |      | Expressed protein                                                                          |
| Pc_TC052212 | 0.71  | 0.2   |      | 1.45  | 0.02      | Up   | -4.48 | 0         | Down | -1.8  | 0.02  | Down | Expressed protein                                                                          |
| Pc_TC052214 | -1.92 | 0.17  |      | -1.94 | 0.21      |      | -2.5  | 0.16      |      | -4.37 | 0.02  | Down | Expressed protein                                                                          |
| Pc_TC052215 | 2.06  | 0.01  | Up   | 0     | 0.01      |      | 1.16  | 0.37      |      | -0.18 | 0.91  |      | Uncharacterized protein                                                                    |
| Pc_TC052219 | 0.05  | 0.91  |      | 0.27  | 0.63      |      | -2.06 | 0.05      | Down | -1.74 | 0.01  | Down | Expressed protein                                                                          |
| Pc_TC052230 | 0.66  | 0.62  |      | 2.96  | 0         | Up   | -1.82 | 0.37      |      | -0.89 | 0.6   |      | Expressed protein                                                                          |
| Pc_TC052232 | 2.23  | 0.02  | Up   | 0     | 0.09      |      | 1.09  | 0.49      |      | 0.04  | 1     |      | Os09g0537200 protein                                                                       |
| Pc_TC052272 | 0.49  | 0.83  |      | 1.06  | 0.52      |      | 2.56  | 0.08      |      | 2.74  | 0.02  | Up   | Expressed protein                                                                          |
| Pc_TC052288 | -0.11 | 0.92  |      | 0.49  | 0.59      |      | -2.82 | 0.05      | Down | -2    | 0.05  |      | Expressed protein                                                                          |
| Pc_TC052295 | -0.35 | 0.58  |      | -2.54 | 0         | Down | -1.89 | 0.1       |      | -2.01 | 0.01  | Down | Expressed protein                                                                          |
| Pc_TC052343 | 1.37  | 0.18  |      | -0.82 | 0.65      |      | 2.57  | 0.05      |      | 2.58  | 0.01  | Up   | Expressed protein                                                                          |
| Pc_TC052355 | 1.36  | 0.13  |      | 2.52  | 0.01      | Up   | 0     | 0.01      |      | 0     | 0.01  |      | Expressed protein                                                                          |
| Pc_TC052358 | 0     | 0.64  |      | 0.06  | 1         |      | 2.31  | 0.3       |      | 3.15  | 0.05  | Up   | Putative uncharacterized protein Sb10g027335 (Fragment)                                    |
| Pc_TC052363 | 2.71  | 0     | Up   | 0     | 0.07      |      | 2.59  | 0.05      |      | 1.39  | 0.23  |      | Uncharacterized protein                                                                    |
| Pc_TC052380 | 1.93  | 0.05  | Up   | 0     | 0.07      |      | 1.54  | 0.29      |      | -1.11 | 0.51  |      | NAD(P)-linked oxidoreductase superfamily protein                                           |
| Pc_TC052427 | -0.44 | 0.72  |      | -0.94 | 0.47      |      | -2.01 | 0.21      |      | -3.7  | 0.02  | Down | fructose-bisphosphate aldolase 1                                                           |
| Pc_TC052428 | 3.89  | 0.04  | Up   | 0     | 1         |      | 3.59  | 0.13      |      | 0.63  | 1     |      | Expressed protein                                                                          |
| Pc_TC052434 | 0.32  | 0.74  |      | 3.05  | 6.66E-005 | Up   | -0.98 | 0.48      |      | -0.66 | 0.54  |      | photosystem II reaction center protein M                                                   |
| Pc_TC052462 | -0.37 | 0.81  |      | 0.54  | 0.67      |      | -4.4  | 0.05      | Down | -2.28 | 0.13  |      | Expressed protein                                                                          |
| Pc_TC052506 | 0.57  | 0.11  |      | 0.5   | 0.27      |      | -4    | 8.29E-005 | Down | -2.55 | ##### | Down | Expressed protein                                                                          |
| Pc_TC052515 | -0.74 | 0.34  |      | -0.67 | 0.45      |      | -3.03 | 0.03      | Down | -1.43 | 0.11  |      | 20S proteasome beta subunit G1                                                             |
| Pc_TC052625 | 0.59  | 0.53  |      | 1.77  | 0.05      | Up   | 0     | 0.01      |      | 0     | 0     |      | Expressed protein                                                                          |
| Pc_TC052660 | 0.08  | 1     |      | -0.02 | 1         |      | 2.66  | 0.03      | Up   | 1.81  | 0.05  | Up   | Expressed protein                                                                          |
| Pc_TC052687 | 3.78  | 0.05  | Up   | 2.87  | 0.28      |      | 3.31  | 0.19      |      | 2.43  | 0.39  |      | Expressed protein                                                                          |
| Pc_TC052689 | 0.99  | 0.45  |      | 2.23  | 0.05      | Up   | -0.91 | 0.69      |      | 0.53  | 0.75  |      | Expressed protein                                                                          |
| Pc_TC052722 | -0.18 | 1     |      | 0     | 0.2       |      | 3.09  | 0.03      | Up   | 2.5   | 0.03  | Up   | cytochrome P450, family 76, subfamily C, polypeptide 2                                     |
| Pc_TC052726 | 3.92  | 0     | Up   | 0     | 0.48      |      | 3.13  | 0.06      |      | 1.36  | 0.5   |      | Expressed protein                                                                          |
| Pc_TC052739 | 2.66  | 0.31  |      | 4.06  | 0.04      | Up   | 0     | 0.87      |      | 0.63  | 1     |      | Expressed protein                                                                          |
| Pc_TC052748 | 0.97  | 0.49  |      | 2.42  | 0.04      | Up   | -0.72 | 0.78      |      | -0.6  | 0.8   |      | Putative uncharacterized protein                                                           |
| Pc_TC052753 | 1.13  | 0.24  |      | 1.93  | 0.05      | Up   | -0.01 | 1         |      | 0.81  | 0.47  |      | Expressed protein                                                                          |
| Pc_TC052758 | 2.29  | 0.02  | Up   | 2.06  | 0.08      |      | 2.55  | 0.07      |      | 2.63  | 0.01  | Up   | Expressed protein                                                                          |
| Pc_TC052763 | 2.15  | 0.08  |      | 2.64  | 0.04      | Up   | -0.5  | 0.91      |      | 0.3   | 0.97  |      | Expressed protein                                                                          |
| Pc_TC052770 | 1.15  | 0.31  |      | 1.06  | 0.41      |      | 2.85  | 0.03      | Up   | 2.3   | 0.02  | Up   | Expressed protein                                                                          |
| Pc_TC052802 | 0.4   | 0.85  |      | 2.52  | 0.02      | Up   | -0.5  | 0.85      |      | -0.37 | 0.89  |      | Expressed protein                                                                          |
| Pc_TC052807 | 0.74  | 0.2   |      | 1.44  | 0.03      | Up   | -1.87 | 0.11      |      | -1.43 | 0.07  |      | Uncharacterized protein                                                                    |
| Pc_TC052812 | 2.54  | 0     | Up   | 0     | 0.02      |      | 1.96  | 0.13      |      | 0.68  | 0.57  |      | tubulin beta 8                                                                             |
| Pc_TC052815 | 3.15  | ##### | Up   | 0     | 0.02      |      | 1.87  | 0.15      |      | 0.28  | 0.86  |      | Expressed protein                                                                          |
| Pc_TC052822 | 2.4   | 0.03  | Up   | 0     | 0.2       |      | 0.24  | 0.98      |      | -0.37 | 0.93  |      | dolichyl-diphosphooligosaccharide-protein glycosyltransferase 48kDa subunit family protein |
| Pc_TC052858 | -0.92 | 0.41  |      | 0.18  | 0.9       |      | -3.37 | 0.05      |      | -3.83 | 0.01  | Down | Expressed protein                                                                          |
| Pc_TC052883 | -0.45 | 0.43  |      | 0.18  | 0.79      |      | -1.49 | 0.17      |      | -1.87 | 0.01  | Down | Expressed protein                                                                          |
| Pc_TC052889 | 0.67  | 0.12  |      | 1.43  | 0.01      | Up   | -4.57 | 8.65E-005 | Down | -1.71 | 0.01  | Down | Expressed protein                                                                          |
| Pc_TC052901 | 1.08  | 0.57  |      | 2.7   | 0.05      | Up   | 0     | 0.26      |      | 0     | 0.24  |      | Expressed protein                                                                          |
| Pc_TC052902 | -0.92 | 0.83  |      | 3.34  | 0.01      | Up   | 1.2   | 0.58      |      | 0.95  | 0.64  |      | Putative uncharacterized protein                                                           |
| Pc_TC052915 | 3.91  | ##### | Up   | 0     | 0.01      |      | 2.56  | 0.04      | Up   | 0.29  | 0.83  |      | heat shock protein 70 (Hsp 70) family protein                                              |

|             |       |       |      |       |           |      |       |      |      |       |      |      |                                                                             |
|-------------|-------|-------|------|-------|-----------|------|-------|------|------|-------|------|------|-----------------------------------------------------------------------------|
| Pc_TC052924 | 0     | 0     |      | -1.16 | 0.37      |      | 2.66  | 0.03 | Up   | 1.32  | 0.16 |      | Expressed protein                                                           |
| Pc_TC052953 | 1.82  | 0.04  | Up   | 0     | 0.02      |      | 1.18  | 0.39 |      | -0.96 | 0.48 |      | Expressed protein                                                           |
| Pc_TC052974 | 0.84  | 0.44  |      | -0.06 | 1         |      | 3.03  | 0.02 | Up   | 1.63  | 0.11 |      | Expressed protein                                                           |
| Pc_TC053007 | 0     | 1     |      | 2.8   | 0         | Up   | -0.35 | 0.84 |      | 0.42  | 0.72 |      | Expressed protein                                                           |
| Pc_TC053015 | 2.08  | 0.2   |      | 1.93  | 0.29      |      | 3.09  | 0.07 |      | 3.21  | 0.02 | Up   | Expressed protein                                                           |
| Pc_TC053022 | 0.54  | 0.21  |      | 0.56  | 0.3       |      | -2.78 | 0.01 | Down | -1.72 | 0.01 | Down | Expressed protein                                                           |
| Pc_TC053032 | 0.08  | 1     |      | 3.19  | 0.01      | Up   | 0     | 0.26 |      | 0     | 0.24 |      | pleiotropic drug resistance 3                                               |
| Pc_TC053055 | -0.69 | 0.17  |      | -1.3  | 0.04      | Down | 2.11  | 0.02 | Up   | 1.23  | 0.04 | Up   | Expressed protein                                                           |
| Pc_TC053056 | -0.34 | 0.68  |      | -2.06 | 0.04      | Down | 1.54  | 0.16 |      | 0.92  | 0.24 |      | Expressed protein                                                           |
| Pc_TC053057 | 1.08  | 0.77  |      | 3.64  | 0.02      | Up   | 0     | 0.53 |      | 2.21  | 0.26 |      | Expressed protein                                                           |
| Pc_TC053069 | 0.66  | 0.97  |      | 3.52  | 0.03      | Up   | 0     | 0.53 |      | 0.63  | 0.96 |      | Expressed protein                                                           |
| Pc_TC053077 | 3.11  | 0     | Up   | 0     | 0.04      |      | 2.43  | 0.06 |      | 1.36  | 0.21 |      | Putative SWI/SNF-related matrix-associated actin-dependent regulator        |
| Pc_TC053088 | 0.13  | 0.88  |      | -0.53 | 0.56      |      | 2     | 0.07 |      | 1.56  | 0.04 | Up   | Expressed protein                                                           |
| Pc_TC053090 | 0.42  | 0.65  |      | 0.94  | 0.32      |      | -1.61 | 0.27 |      | -2.49 | 0.04 | Down | Expressed protein                                                           |
| Pc_TC053148 | -0.34 | 1     |      | 1.38  | 0.45      |      | 1.59  | 0.41 |      | 3.3   | 0.01 | Up   | Expressed protein                                                           |
| Pc_TC053177 | -2.04 | 0.02  | Down | -0.25 | 0.79      |      | 0.37  | 0.76 |      | -0.05 | 0.97 |      | Tudor/PWWP/MBT superfamily protein                                          |
| Pc_TC053182 | 1.92  | ##### | Up   | 0     | 4.26E-013 |      | 1.67  | 0.08 |      | 0.8   | 0.2  |      | calmodulin-like 11                                                          |
| Pc_TC053199 | 2.44  | 0.02  | Up   | 0     | 0.15      |      | 1.4   | 0.39 |      | 0.52  | 0.78 |      | vacuolar proton ATPase A3                                                   |
| Pc_TC053226 | 0.08  | 1     |      | 3.45  | 0.03      | Up   | 0.5   | 1    |      | -0.37 | 1    |      | Expressed protein                                                           |
| Pc_TC053230 | 0.73  | 0.65  |      | 2.5   | 0.03      | Up   | -2.3  | 0.36 |      | -0.6  | 0.8  |      | Expressed protein                                                           |
| Pc_TC053238 | -3.09 | 0.04  | Down | -3.11 | 0.06      |      | 2.01  | 0.11 |      | 1.13  | 0.26 |      | Expressed protein                                                           |
| Pc_TC053244 | -2.73 | 0.05  | Down | -0.63 | 0.62      |      | -0.37 | 0.82 |      | -0.77 | 0.52 |      | Expressed protein                                                           |
| Pc_TC053246 | 2.66  | 0.02  | Up   | 0     | 0.27      |      | 2.09  | 0.2  |      | -0.7  | 0.83 |      | N-terminal nucleophile aminohydrolases (Ntn hydrolases) superfamily protein |
| Pc_TC053247 | 2.08  | 0.3   |      | 3.76  | 0.01      | Up   | -0.5  | 1    |      | 0     | 0.54 |      | Putative uncharacterized protein                                            |
| Pc_TC053255 | -1.01 | 0.43  |      | 0.56  | 0.64      |      | 4     | 0    | Up   | 2.11  | 0.02 | Up   | Expressed protein                                                           |
| Pc_TC053263 | 0.08  | 0.96  |      | -0.9  | 0.38      |      | 2.39  | 0.03 | Up   | 1.03  | 0.22 |      | Kinetoplastid membrane protein 11                                           |
| Pc_TC053342 | 2.83  | 0.02  | Up   | 2.15  | 0.15      |      | 2.75  | 0.09 |      | 2.48  | 0.07 |      | Expressed protein                                                           |
| Pc_TC053359 | 0.85  | 0.38  |      | -1.44 | 0.32      |      | -3.58 | 0.07 |      | -3.46 | 0.03 | Down | Expressed protein                                                           |
| Pc_TC053373 | 0.61  | 0.23  |      | 1.26  | 0.03      | Up   | -2.23 | 0.04 | Down | -0.91 | 0.19 |      | Expressed protein                                                           |
| Pc_TC053379 | 0.08  | 1     |      | 1.21  | 0.23      |      | -4.67 | 0.03 | Down | -4.54 | 0.01 | Down | Expressed protein                                                           |
| Pc_TC053382 | 3.08  | 0.01  | Up   | 2.31  | 0.11      |      | 2.2   | 0.2  |      | 2.33  | 0.09 |      | Expressed protein                                                           |
| Pc_TC053406 | 0.95  | 0.54  |      | 2.47  | 0.04      | Up   | 0.62  | 0.79 |      | -0.37 | 0.93 |      | Putative uncharacterized protein Sb04g018075 (Fragment)                     |
| Pc_TC053421 | 3.33  | 0.03  | Up   | 0     | 0.67      |      | 3.09  | 0.11 |      | 0.63  | 0.96 |      | 26S proteasome regulatory complex,non-ATPase subcomplex,Rpn2/Psmd1 subunit  |
| Pc_TC053434 | 1.86  | 0.01  | Up   | 0     | 0         |      | 1.13  | 0.37 |      | 1.37  | 0.13 |      | Expressed protein                                                           |
| Pc_TC053451 | -2.24 | 0.23  |      | -2.26 | 0.27      |      | 3.67  | 0    | Up   | 2     | 0.06 |      | Expressed protein                                                           |
| Pc_TC053480 | 0.66  | 0.58  |      | 2.31  | 0.02      | Up   | -2.08 | 0.28 |      | -1.37 | 0.37 |      | Expressed protein                                                           |
| Pc_TC053492 | -1.46 | 0.06  |      | -0.31 | 0.72      |      | -1.52 | 0.21 |      | -2.12 | 0.02 | Down | Expressed protein                                                           |
| Pc_TC053498 | 2.54  | 0.02  | Up   | 0     | 0.2       |      | 1.67  | 0.31 |      | 0.63  | 0.74 |      | Expressed protein                                                           |
| Pc_TC053507 | -0.58 | 0.55  |      | -0.94 | 0.4       |      | -0.7  | 0.61 |      | -2.7  | 0.03 | Down | glucan synthase-like 11                                                     |
| Pc_TC053514 | 3.89  | 0.04  | Up   | 0     | 1         |      | 1.83  | 0.66 |      | -0.37 | 1    |      | Expressed protein                                                           |
| Pc_TC053523 | 1.49  | 0.44  |      | 3.06  | 0.03      | Up   | 1.09  | 0.69 |      | 1.36  | 0.5  |      | Expressed protein                                                           |
| Pc_TC053531 | -0.63 | 0.27  |      | -2.03 | 0.01      | Down | -0.07 | 0.95 |      | -0.76 | 0.28 |      | aconitase 3                                                                 |
| Pc_TC053544 | 2.19  | 0.02  | Up   | 2.28  | 0.04      | Up   | -2.67 | 0.25 |      | 0.98  | 0.45 |      | Expressed protein                                                           |
| Pc_TC053568 | 2.61  | 0.02  | Up   | 0     | 0.27      |      | 1.35  | 0.47 |      | 1.11  | 0.5  |      | Expressed protein                                                           |
| Pc_TC053580 | 2.25  | 0.05  | Up   | 0     | 0.2       |      | 0.73  | 0.73 |      | 1.13  | 0.45 |      | Expressed protein                                                           |
| Pc_TC053590 | -1.8  | 0.29  |      | -1.4  | 0.44      |      | 3.76  | 0    | Up   | 1.69  | 0.11 |      | Peroxidase superfamily protein                                              |
| Pc_TC053595 | 3.08  | 0.02  | Up   | 0     | 0.48      |      | 0.5   | 0.95 |      | 0     | 0.35 |      | Expressed protein                                                           |
| Pc_TC053596 | 1.4   | 0.61  |      | 1.87  | 0.44      |      | 3.55  | 0.05 |      | 3.98  | 0    | Up   | Expressed protein                                                           |
| Pc_TC053623 | -0.58 | 0.55  |      | 0.71  | 0.45      |      | 1.73  | 0.14 |      | 1.98  | 0.02 | Up   | Uncharacterized protein                                                     |
| Pc_TC053647 | 1.59  | 0.18  |      | -0.43 | 0.91      |      | 0.7   | 0.73 |      | 2.46  | 0.03 | Up   | Expressed protein                                                           |
| Pc_TC053651 | 0.08  | 1     |      | -0.36 | 0.92      |      | 3.06  | 0.02 | Up   | 1.87  | 0.1  |      | Uncharacterized protein                                                     |
| Pc_TC053659 | -1.09 | 0.29  |      | -1    | 0.39      |      | -3.25 | 0.05 | Down | -1.54 | 0.17 |      | Expressed protein                                                           |
| Pc_TC053660 | 3.25  | 0.03  | Up   | 3.92  | 0.01      | Up   | 0.83  | 0.88 |      | 0.21  | 1    |      | Expressed protein                                                           |
| Pc_TC053706 | 0.58  | 0.58  |      | -0.44 | 0.77      |      | -4.58 | 0.03 | Down | -2.46 | 0.09 |      | Expressed protein                                                           |
| Pc_TC053742 | 3.66  | 0.01  | Up   | 3.7   | 0.02      | Up   | 1.09  | 0.77 |      | 2.95  | 0.08 |      | Expressed protein                                                           |
| Pc_TC053743 | 1.08  | 0.51  |      | 2.87  | 0.02      | Up   | 1.27  | 0.5  |      | 1.95  | 0.15 |      | S-methyl-5'-thioadenosine phosphorylase                                     |
| Pc_TC053771 | -0.92 | 0.55  |      | -1.94 | 0.28      |      | 2.69  | 0.04 | Up   | 0.36  | 0.81 |      | Expressed protein                                                           |
| Pc_TC053779 | -0.14 | 1     |      | 0.42  | 0.87      |      | 3.3   | 0.02 | Up   | 2.86  | 0.01 | Up   | KH domain containing protein,expressed                                      |
| Pc_TC053794 | 3.4   | ##### | Up   | 0     | 0.04      |      | 2.46  | 0.06 |      | 0.85  | 0.48 |      | non-ATPase subunit 9                                                        |
| Pc_TC053807 | 3.06  | 0     | Up   | 0     | 0.11      |      | 0.75  | 0.68 |      | 1.33  | 0.29 |      | Carboxypeptidase I (Fragment)                                               |
| Pc_TC053831 | -0.92 | 0.83  |      | 0.06  | 1         |      | 3.2   | 0.04 | Up   | 0.43  | 0.93 |      | Expressed protein                                                           |
| Pc_TC053839 | 1.08  | 0.77  |      | 2.87  | 0.11      |      | 3.9   | 0.03 | Up   | 3.33  | 0.03 | Up   | Expressed protein                                                           |

|             |       |       |      |       |           |      |       |      |       |       |       |                                                           |                   |  |
|-------------|-------|-------|------|-------|-----------|------|-------|------|-------|-------|-------|-----------------------------------------------------------|-------------------|--|
| Pc_TC053853 | -1.86 | 0.12  |      | 0.18  | 0.91      |      | 0     | 0    | -2.9  | 0.03  | Down  | Expressed protein                                         |                   |  |
| Pc_TC053873 | 0.66  | 0.97  |      | 3.58  | 0.02      | Up   | 1.09  | 0.77 | 0     | 0.54  |       | Expressed protein                                         |                   |  |
| Pc_TC053876 | 3.23  | ##### | Up   | 0     | 0.02      |      | 1.45  | 0.28 | 0.72  | 0.53  |       | Expressed protein                                         |                   |  |
| Pc_TC053897 | 2.4   | 0.01  | Up   | 2.47  | 0.02      | Up   | 1.33  | 0.38 | 1.63  | 0.16  |       | Concanavalin A-like lectin protein kinase family protein  |                   |  |
| Pc_TC053899 | 0.22  | 0.95  |      | 2.52  | 0.01      | Up   | -1.82 | 0.37 | -1.7  | 0.32  |       | Expressed protein                                         |                   |  |
| Pc_TC053918 | -0.41 | 0.69  |      | -1.94 | 0.11      |      | -2.98 | 0.06 | -5.18 | 0     | Down  | Expressed protein                                         |                   |  |
| Pc_TC053936 | -1.41 | 0.01  | Down | -0.71 | 0.28      |      | 0.91  | 0.36 | 0.21  | 0.75  |       | Uncharacterized protein                                   |                   |  |
| Pc_TC053951 | -0.92 | 1     |      | 0.06  | 1         |      | 3.46  | 0.06 | 3.21  | 0.04  | Up    | Expressed protein                                         |                   |  |
| Pc_TC053962 | 0.08  | 0.99  |      | -0.18 | 0.93      |      | -3.82 | 0.04 | Down  | -1.7  | 0.18  | Expressed protein                                         |                   |  |
| Pc_TC053969 | 3.25  | 0.03  | Up   | 1.64  | 0.53      |      | 0     | 0.53 | 0     | 0.54  |       | Expressed protein                                         |                   |  |
| Pc_TC053978 | 2.17  | 0.03  | Up   | 1.06  | 0.46      |      | 0.2   | 0.97 | 1.02  | 0.45  |       | Expressed protein                                         |                   |  |
| Pc_TC054009 | 2.34  | 0.05  | Up   | 1.44  | 0.37      |      | 1.09  | 0.59 | 1.39  | 0.36  |       | Expressed protein                                         |                   |  |
| Pc_TC054014 | 0.08  | 1     |      | 2.11  | 0.03      | Up   | -0.5  | 0.79 | 0.21  | 0.91  |       | S18 ribosomal protein                                     |                   |  |
| Pc_TC054021 | 3.78  | 0     | Up   | 0     | 0.36      |      | 3.86  | 0.01 | Up    | 1.21  | 0.5   | 4-coumarate:CoA ligase 1                                  |                   |  |
| Pc_TC054022 | -0.02 | 0.98  |      | 0.14  | 0.81      |      | -3.73 | 0    | Down  | -2.76 | 0     | Down                                                      | Expressed protein |  |
| Pc_TC054029 | 3.66  | 0.06  |      | 0     | 1         |      | 4.5   | 0.03 | Up    | 1.95  | 0.58  | Expressed protein                                         |                   |  |
| Pc_TC054055 | -0.51 | 0.51  |      | 0.77  | 0.32      |      | -3.08 | 0.02 | Down  | -2.28 | 0.02  | Down                                                      | Expressed protein |  |
| Pc_TC054060 | 0.22  | 0.87  |      | -1.19 | 0.38      |      | 1.98  | 0.11 |       | 1.8   | 0.05  | Up                                                        | Expressed protein |  |
| Pc_TC054091 | 1.49  | 0.17  |      | 2.38  | 0.03      | Up   | -0.67 | 0.76 | 1.98  | 0.07  |       | Peritrophic matrix insect intestinal mucin (Fragment)     |                   |  |
| Pc_TC054092 | 3.14  | 0.01  | Up   | 0     | 0.48      |      | 2.67  | 0.13 | 1.85  | 0.29  |       | Expressed protein                                         |                   |  |
| Pc_TC054099 | 2.72  | 0.03  | Up   | 0     | 0.36      |      | 2.63  | 0.11 | 1.63  | 0.31  |       | Expressed protein                                         |                   |  |
| Pc_TC054108 | 1.95  | 0.24  |      | 3.12  | 0.03      | Up   | -2.08 | 0.63 | 0.36  | 1     |       | Expressed protein                                         |                   |  |
| Pc_TC054157 | 2.17  | 0     | Up   | -4.85 | 0         | Down | 1.94  | 0.1  | -0.28 | 0.8   |       | polyubiquitin 3                                           |                   |  |
| Pc_TC054176 | 2.3   | 0.04  | Up   | 0     | 0.2       |      | 2.5   | 0.09 | 0.63  | 0.74  |       | Uncharacterized protein                                   |                   |  |
| Pc_TC054190 | 0.76  | 0.33  |      | 0.99  | 0.26      |      | 2.39  | 0.04 | Up    | 1.51  | 0.07  | Expressed protein                                         |                   |  |
| Pc_TC054211 | 2.51  | 0.03  | Up   | 0     | 0.27      |      | 2.39  | 0.13 | 0.89  | 0.63  |       | Uncharacterized protein                                   |                   |  |
| Pc_TC054228 | 3.47  | 0     | Up   | 0     | 0.36      |      | 3.39  | 0.03 | Up    | 1.8   | 0.24  | Expressed protein                                         |                   |  |
| Pc_TC054237 | -1.51 | 0.24  |      | -4.11 | 0.03      | Down | 1.74  | 0.17 | 0.16  | 0.93  |       | Expressed protein                                         |                   |  |
| Pc_TC054242 | 2.66  | 0.31  |      | 4.23  | 0.02      | Up   | 0     | 0.87 | 0.63  | 1     |       | Expressed protein                                         |                   |  |
| Pc_TC054249 | -0.55 | 0.49  |      | -3.03 | 0.01      | Down | -3.58 | 0.01 | Down  | -6.05 | ##### | Down                                                      | Expressed protein |  |
| Pc_TC054270 | 0.31  | 0.53  |      | 1.09  | 0.05      |      | -2.25 | 0.03 | Down  | -1.78 | 0.01  | Down                                                      | Expressed protein |  |
| Pc_TC054285 | -5.13 | 0     | Down | 0.58  | 0.52      |      | -0.42 | 0.75 | 0.7   | 0.42  |       | Expressed protein                                         |                   |  |
| Pc_TC054305 | 0.46  | 0.42  |      | 0.97  | 0.14      |      | -3.1  | 0.01 | Down  | -2.23 | 0.01  | Down                                                      | Expressed protein |  |
| Pc_TC054315 | -1.21 | 0.29  |      | -0.31 | 0.82      |      | -3.37 | 0.05 | -3.25 | 0.02  | Down  | Expressed protein                                         |                   |  |
| Pc_TC054327 | 1.56  | 0.08  |      | 2.08  | 0.03      | Up   | -1.6  | 0.35 | 0.53  | 0.67  |       | Expressed protein                                         |                   |  |
| Pc_TC054336 | -0.92 | 0.83  |      | 1.06  | 0.62      |      | 3.2   | 0.04 | Up    | 1.95  | 0.19  | Expressed protein                                         |                   |  |
| Pc_TC054343 | 0.59  | 0.47  |      | 0.51  | 0.59      |      | 1.29  | 0.27 | 2.68  | 0     | Up    | Expressed protein                                         |                   |  |
| Pc_TC054359 | 3.4   | 0.02  | Up   | 0     | 0.67      |      | 0.09  | 1    | 0.21  | 1     |       | TCOP-1/cpn60 chaperonin family protein                    |                   |  |
| Pc_TC054378 | 1.88  | 0     | Up   | 0     | 4.35E-008 |      | 1.54  | 0.14 | -0.03 | 0.98  |       | Ribosomal L27e protein family                             |                   |  |
| Pc_TC054402 | 2.74  | 0.05  | Up   | 0     | 0.48      |      | -0.08 | 1    | 1.63  | 0.38  |       | Putative uncharacterized protein                          |                   |  |
| Pc_TC054463 | 1.34  | 0.21  |      | 2.26  | 0.03      | Up   | 0     | 0.05 | 0     | 0.03  |       | Expressed protein                                         |                   |  |
| Pc_TC054467 | -1.51 | 0.42  |      | 0     | 0.09      |      | 2.98  | 0.03 | Up    | -1.22 | 0.49  | Expressed protein                                         |                   |  |
| Pc_TC054488 | -1.01 | 0.21  |      | -2.5  | 0.02      | Down | -0.02 | 1    | -0.24 | 0.79  |       | Uncharacterized protein                                   |                   |  |
| Pc_TC054490 | -1.04 | 0     | Down | 1.9   | 5.82E-007 | Up   | -0.38 | 0.64 | -0.63 | 0.2   |       | Expressed protein                                         |                   |  |
| Pc_TC054496 | 1.98  | ##### | Up   | 0     | 4.64E-009 |      | 2.03  | 0.04 | Up    | -0.26 | 0.73  | Expressed protein                                         |                   |  |
| Pc_TC054512 | 2.46  | 0     | Up   | 0     | 0.02      |      | 2.04  | 0.12 | 0.28  | 0.86  |       | Expressed protein                                         |                   |  |
| Pc_TC054519 | 2.54  | 0.05  | Up   | 0.64  | 0.84      |      | 0.83  | 0.75 | 2.58  | 0.05  |       | Expressed protein                                         |                   |  |
| Pc_TC054532 | -1.24 | 0.67  |      | -0.26 | 1         |      | 3.11  | 0.04 | Up    | 2.83  | 0.02  | Up                                                        | Expressed protein |  |
| Pc_TC054547 | 0.55  | 0.24  |      | 1.03  | 0.06      |      | -2.69 | 0.01 | Down  | 0.26  | 0.68  | Expressed protein                                         |                   |  |
| Pc_TC054549 | 2.29  | 0.02  | Up   | 1.87  | 0.12      |      | -0.91 | 0.69 | 1.48  | 0.23  |       | Uncharacterized protein                                   |                   |  |
| Pc_TC054568 | -0.44 | 0.48  |      | -1.59 | 0.04      | Down | 1.18  | 0.25 | 0.61  | 0.38  |       | Expressed protein                                         |                   |  |
| Pc_TC054600 | 1.66  | 0.07  |      | 2.19  | 0.03      | Up   | -0.88 | 0.62 | 0.38  | 0.79  |       | Expressed protein                                         |                   |  |
| Pc_TC054615 | 1.66  | 0.72  |      | 3.96  | 0.05      | Up   | 1.5   | 0.78 | 0     | 0.9   |       | Expressed protein                                         |                   |  |
| Pc_TC054649 | 1.08  | 0.47  |      | 0.8   | 0.67      |      | 2.9   | 0.05 | Up    | 1.95  | 0.12  | Expressed protein                                         |                   |  |
| Pc_TC054655 | 2.32  | 0     | Up   | 0     | 0.02      |      | 2.32  | 0.07 | -0.11 | 0.98  |       | Expressed protein                                         |                   |  |
| Pc_TC054670 | 0.89  | 0.68  |      | 3.1   | 0.02      | Up   | -0.5  | 0.95 | 0.21  | 1     |       | gag protein                                               |                   |  |
| Pc_TC054675 | -2.04 | 0.2   |      | -1.06 | 0.51      |      | 0     | 0.03 | -4.08 | 0.04  | Down  | Expressed protein                                         |                   |  |
| Pc_TC054684 | -1.05 | 0.21  |      | -2.88 | 0.01      | Down | -4.02 | 0.01 | Down  | -0.31 | 0.74  | Expressed protein                                         |                   |  |
| Pc_TC054700 | 1.34  | 0.01  | Up   | 0     | 8.32E-011 |      | 1.22  | 0.22 | -0.2  | 0.78  |       | GATA type zinc finger transcription factor family protein | LIM               |  |
| Pc_TC054708 | -1.53 | 0.03  | Down | -0.69 | 0.37      |      | 0.98  | 0.35 | -0.45 | 0.56  |       | Uncharacterized protein                                   |                   |  |
| Pc_TC054750 | 3.89  | 0.04  | Up   | 3.23  | 0.18      |      | 3.96  | 0.08 | 1.63  | 0.71  |       | Expressed protein                                         |                   |  |
| Pc_TC054751 | 2.89  | 0.03  | Up   | 0     | 0.48      |      | 1.09  | 0.69 | 0     | 0.35  |       | organic cation/carnitine transporter4                     |                   |  |

|             |       |       |      |       |           |      |       |      |      |       |      |      |                                                        |     |
|-------------|-------|-------|------|-------|-----------|------|-------|------|------|-------|------|------|--------------------------------------------------------|-----|
| Pc_TC054760 | -0.39 | 0.77  |      | 1.93  | 0.04      | Up   | 0     | 0.01 |      | -2.54 | 0.08 |      | Expressed protein                                      |     |
| Pc_TC054798 | 2.14  | 0.02  | Up   | 3.29  | 0         | Up   | -1.15 | 0.55 |      | 1.17  | 0.31 |      | Expressed protein                                      |     |
| Pc_TC054802 | 2.7   | 0.01  | Up   | 0     | 0.2       |      | 2.17  | 0.16 |      | 0.04  | 1    |      | Bax inhibitor-1 family protein                         |     |
| Pc_TC054804 | 0.67  | 0.14  |      | 1.16  | 0.03      | Up   | -2.23 | 0.03 | Down | -0.76 | 0.24 |      | Expressed protein                                      |     |
| Pc_TC054814 | 2.47  | 0     | Up   | 0     | 0.04      |      | 1.53  | 0.27 |      | 1.43  | 0.18 |      | Expressed protein                                      |     |
| Pc_TC054825 | 0.49  | 0.96  |      | 0     | 0.48      |      | 3.59  | 0.03 | Up   | 2.43  | 0.11 |      | Expressed protein                                      |     |
| Pc_TC054835 | -0.47 | 0.43  |      | -0.12 | 0.87      |      | -1.18 | 0.27 |      | -1.57 | 0.04 | Down | Expressed protein                                      |     |
| Pc_TC054843 | 3.17  | 0.04  | Up   | 3.06  | 0.08      |      | -1.5  | 0.85 |      | -0.37 | 1    |      | Expressed protein                                      |     |
| Pc_TC054844 | 1.81  | 0.03  | Up   | 1.1   | 0.3       |      | 1.57  | 0.23 |      | 2.43  | 0.01 | Up   | Expressed protein                                      |     |
| Pc_TC054850 | 2.49  | 0.02  | Up   | 0     | 0.2       |      | 2.24  | 0.14 |      | 1.74  | 0.18 |      | Expressed protein                                      |     |
| Pc_TC054862 | -3.45 | 0.02  | Down | -0.77 | 0.53      |      | -2.02 | 0.19 |      | -2.58 | 0.05 | Down | Putative uncharacterized protein                       |     |
| Pc_TC054882 | 1.58  | 0.04  | Up   | 0     | 0         |      | 1.17  | 0.35 |      | 0.04  | 1    |      | Expressed protein                                      |     |
| Pc_TC054884 | -0.87 | 0.19  |      | -3.55 | 0         | Down | 0.24  | 0.83 |      | -0.19 | 0.81 |      | Expressed protein                                      |     |
| Pc_TC054907 | -0.42 | 0.58  |      | -0.04 | 0.99      |      | -2.13 | 0.09 |      | -2.33 | 0.01 | Down | Expressed protein                                      |     |
| Pc_TC054912 | 2.83  | 0     | Up   | 0     | 0.15      |      | 2.5   | 0.08 |      | 0.63  | 0.72 |      | Expressed protein                                      |     |
| Pc_TC054926 | 0.61  | 0.25  |      | 0.97  | 0.12      |      | -2.21 | 0.05 | Down | -1.71 | 0.02 | Down | Putative retroelement                                  |     |
| Pc_TC054930 | 4.08  | 0     | Up   | 0     | 0.67      |      | 2.83  | 0.16 |      | 1.43  | 0.58 |      | Cullin family protein                                  |     |
| Pc_TC054947 | 3.47  | 0     | Up   | 0     | 0.36      |      | 2.86  | 0.07 |      | -0.05 | 1    |      | Ribosomal RNA adenine dimethylase family protein       |     |
| Pc_TC054952 | 4.86  | ##### | Up   | 0     | 0.67      |      | 1.67  | 0.53 |      | 0     | 0.54 |      | Expressed protein                                      |     |
| Pc_TC054959 | 3.49  | 0     | Up   | 0     | 0.48      |      | 2.83  | 0.11 |      | 0.36  | 1    |      | Expressed protein                                      |     |
| Pc_TC054971 | -0.23 | 0.65  |      | -1.52 | 0.02      | Down | 1.15  | 0.23 |      | 0.33  | 0.6  |      | Expressed protein                                      |     |
| Pc_TC054977 | -0.18 | 1     |      | -0.53 | 0.89      |      | 2.87  | 0.05 | Up   | 1.56  | 0.25 |      | Expressed protein                                      |     |
| Pc_TC054987 | 4.36  | 0     | Up   | 0     | 0.67      |      | 3.83  | 0.03 | Up   | -1.37 | 0.88 |      | Expressed protein                                      |     |
| Pc_TC054999 | 4.33  | 0.01  | Up   | 0     | 1         |      | 2.67  | 0.36 |      | 1.63  | 0.71 |      | Expressed protein                                      |     |
| Pc_TC055008 | 0.61  | 0.68  |      | 3.25  | 0         | Up   | 0     | 0.07 |      | -1.96 | 0.29 |      | Expressed protein                                      |     |
| Pc_TC055011 | 0     | 0.64  |      | 1.06  | 0.8       |      | 4.06  | 0.02 | Up   | 3.27  | 0.04 | Up   | Expressed protein                                      |     |
| Pc_TC055012 | 0.11  | 0.91  |      | 0.35  | 0.68      |      | -1.7  | 0.18 |      | -2.02 | 0.04 | Down | Expressed protein                                      |     |
| Pc_TC055050 | 2.78  | 0.01  | Up   | 0     | 0.2       |      | 2.47  | 0.1  |      | 0.04  | 1    |      | Expressed protein                                      |     |
| Pc_TC055095 | 4.25  | 0.01  | Up   | 3.38  | 0.14      |      | 0     | 0.87 |      | 2.21  | 0.47 |      | Expressed protein                                      |     |
| Pc_TC055125 | 0.24  | 0.67  |      | 0.24  | 0.72      |      | -3.92 | 0    | Down | -2.24 | 0    | Down | Expressed protein                                      |     |
| Pc_TC055135 | 2.61  | 0.02  | Up   | 0     | 0.27      |      | 2.99  | 0.05 | Up   | 0.89  | 0.63 |      | Expressed protein                                      |     |
| Pc_TC055143 | -2.47 | 0.01  | Down | -0.66 | 0.51      |      | -1    | 0.44 |      | -0.92 | 0.33 |      | Expressed protein                                      |     |
| Pc_TC055157 | 2.72  | 0.03  | Up   | 0     | 0.36      |      | 3.12  | 0.05 | Up   | 1.8   | 0.24 |      | P450 reductase 2                                       |     |
| Pc_TC055178 | 0.93  | 0.18  |      | 1.92  | 0.01      | Up   | 0.53  | 0.65 |      | 0.1   | 0.93 |      | Expressed protein                                      |     |
| Pc_TC055211 | 3.25  | 0     | Up   | 0     | 0.2       |      | 2.56  | 0.08 |      | 1.95  | 0.12 |      | ATP synthase epsilon chain,mitochondrial               |     |
| Pc_TC055234 | 0.49  | 0.83  |      | -0.2  | 1         |      | 3.24  | 0.02 | Up   | 2.29  | 0.06 |      | Expressed protein                                      |     |
| Pc_TC055250 | -3.01 | 0.01  | Down | -2.71 | 0.03      | Down | -1    | 0.46 |      | 0.42  | 0.66 |      | Heat shock protein DnaJ with tetratricopeptide repeat  | TPR |
| Pc_TC055251 | -2.64 | 0.01  | Down | -0.51 | 0.59      |      | 1.94  | 0.08 |      | 0.95  | 0.24 |      | Heat shock protein DnaJ with tetratricopeptide repeat  | TPR |
| Pc_TC055278 | 3.99  | 0     | Up   | 0     | 0.67      |      | 2.96  | 0.14 |      | 2.33  | 0.22 |      | Expressed protein                                      |     |
| Pc_TC055297 | 0.37  | 0.66  |      | -1.2  | 0.25      |      | -0.91 | 0.49 |      | -2.74 | 0.02 | Down | Expressed protein                                      |     |
| Pc_TC055312 | 3.17  | 0.04  | Up   | 0     | 0.67      |      | 2.09  | 0.38 |      | 0     | 0.54 |      | Expressed protein                                      |     |
| Pc_TC055321 | -2.26 | ##### | Down | -3.77 | 3.28E-008 | Down | -0.83 | 0.39 |      | -1.07 | 0.08 |      | protein,putative,Ty1-copia subclass                    |     |
| Pc_TC055328 | 1.66  | 0.48  |      | 0.06  | 1         |      | 4     | 0.02 | Up   | 3.38  | 0.03 | Up   | Peroxisomal N1-acetyl-spermine/spermidine oxidase      |     |
| Pc_TC055332 | 2.64  | 0     | Up   | 0     | 0.01      |      | 1.92  | 0.12 |      | -0.37 | 0.78 |      | SecY protein transport family protein                  |     |
| Pc_TC055341 | 2.89  | 0.03  | Up   | 0     | 0.48      |      | 2.73  | 0.12 |      | 1.21  | 0.58 |      | Heat shock protein 70 (Hsp 70) family protein          |     |
| Pc_TC055359 | 0.76  | 0.71  |      | 0.06  | 1         |      | 3.14  | 0.03 | Up   | 1.47  | 0.32 |      | Transferrin                                            |     |
| Pc_TC055360 | 3.34  | ##### | Up   | 0     | 0.02      |      | 3.23  | 0.01 | Up   | -0.79 | 0.55 |      | Expressed protein                                      |     |
| Pc_TC055361 | 1.25  | 0.48  |      | 2.76  | 0.04      | Up   | 0.83  | 0.75 |      | 1.8   | 0.24 |      | Expressed protein                                      |     |
| Pc_TC055381 | 1.79  | 0.04  | Up   | 0     | 0.02      |      | 1.53  | 0.25 |      | 0.91  | 0.42 |      | NADH-ubiquinone oxidoreductase 24 kDa subunit,putative |     |
| Pc_TC055397 | -0.45 | 0.78  |      | -0.83 | 0.61      |      | -1.39 | 0.44 |      | -4.08 | 0.04 | Down | Expressed protein                                      |     |
| Pc_TC055418 | 1.08  | 0.4   |      | 2.73  | 0.01      | Up   | -3.5  | 0.19 |      | -2.37 | 0.25 |      | Expressed protein                                      |     |
| Pc_TC055419 | 3.18  | 0     | Up   | 0     | 0.27      |      | 2.64  | 0.09 |      | 2.06  | 0.12 |      | SELT-like protein precursor                            |     |
| Pc_TC055424 | -0.12 | 0.85  |      | 1.6   | 0.01      | Up   | -2.66 | 0.02 | Down | -1.27 | 0.08 |      | Expressed protein                                      |     |
| Pc_TC055438 | 2.54  | 0.05  | Up   | 0     | 0.36      |      | 2.5   | 0.13 |      | 1.71  | 0.27 |      | aspartate aminotransferase 3                           |     |
| Pc_TC055454 | 3.17  | 0.04  | Up   | 0     | 0.67      |      | 1.96  | 0.42 |      | 0.63  | 0.96 |      | Expressed protein                                      |     |
| Pc_TC055462 | 0     | 0.44  |      | 0     | 0.48      |      | 4.46  | 0    | Up   | 1.21  | 0.58 |      | Expressed protein                                      |     |
| Pc_TC055472 | 0     | 0.64  |      | -0.94 | 1         |      | 3.9   | 0.03 | Up   | 2.33  | 0.22 |      | Expressed protein                                      |     |
| Pc_TC055490 | -0.3  | 0.77  |      | 0.93  | 0.3       |      | -3.82 | 0.02 | Down | -2.47 | 0.04 | Down | Expressed protein                                      |     |
| Pc_TC055517 | 1.37  | 0.11  |      | 1.98  | 0.03      | Up   | -0.97 | 0.54 |      | 0.63  | 0.57 |      | Uncharacterized protein                                |     |
| Pc_TC055522 | 1.9   | 0.03  | Up   | 0     | 0.03      |      | 0.76  | 0.62 |      | 0.25  | 0.89 |      | emp24/gp25L/p24 family/GOLD family protein             |     |
| Pc_TC055538 | 3.08  | 0.05  | Up   | 1.64  | 0.53      |      | 1.5   | 0.6  |      | 2.33  | 0.22 |      | Expressed protein                                      |     |
| Pc_TC055549 | 4.08  | 0.02  | Up   | 3.64  | 0.09      |      | 4.41  | 0.03 | Up   | 3.8   | 0.05 |      | Expressed protein                                      |     |

|             |       |       |      |       |           |      |  |           |      |      |       |       |      |                                                                            |      |
|-------------|-------|-------|------|-------|-----------|------|--|-----------|------|------|-------|-------|------|----------------------------------------------------------------------------|------|
| Pc_TC055573 | 1.54  | 0.04  | Up   | 0.75  | 0.42      |      |  | -0.9      | 0.52 |      | 0.05  | 0.99  |      | Expressed protein                                                          |      |
| Pc_TC055591 | 0.19  | 0.87  |      | 1.36  | 0.14      |      |  | -2.27     | 0.14 |      | -3.37 | 0.02  | Down | Uncharacterized protein                                                    |      |
| Pc_TC055593 | 0.46  | 0.66  |      | 0.2   | 0.9       |      |  | 3.5       | 0    | Up   | 2.11  | 0.02  | Up   | Expressed protein                                                          |      |
| Pc_TC055620 | 0.42  | 0.43  |      | 0.29  | 0.66      |      |  | -3.16     | 0.01 | Down | -2.94 | 0     | Down | Expressed protein                                                          |      |
| Pc_TC055627 | 1.47  | 0.03  | Up   | -4.19 | 0         | Down |  | 1.36      | 0.24 |      | -0.87 | 0.37  |      | calmodulin 7                                                               |      |
| Pc_TC055628 | 2.77  | 0     | Up   | 0     | 0.01      |      |  | 1.55      | 0.23 |      | -0.56 | 0.68  |      | glutathione peroxidase 6                                                   |      |
| Pc_TC055675 | 0.32  | 0.61  |      | 0.07  | 0.94      |      |  | -3.74     | 0    | Down | -1.79 | 0.03  | Down | Expressed protein                                                          |      |
| Pc_TC055689 | -0.1  | 0.79  |      | 0.52  | 0.27      |      |  | -1.42     | 0.13 |      | -1.13 | 0.05  | Down | Expressed protein                                                          |      |
| Pc_TC055701 | -1.27 | 0.03  | Down | -0.08 | 0.91      |      |  | -0.18     | 0.87 |      | 0.04  | 0.96  |      | S-adenosyl-L-methionine-dependent methyltransferases superfamily protein   |      |
| Pc_TC055720 | 1.66  | 0.48  |      | 2.96  | 0.09      |      |  | 3.26      | 0.09 |      | 3.95  | 0.01  | Up   | Expressed protein                                                          |      |
| Pc_TC055737 | -0.91 | 0.1   |      | -1.39 | 0.04      | Down |  | 0.85      | 0.39 |      | -0.41 | 0.54  |      | Protein of Unknown Function (DUF239)                                       |      |
| Pc_TC055738 | 4.54  | 0.01  | Up   | 0     | 1         |      |  | 2.83      | 0.32 |      | 0.63  | 1     |      | Expressed protein                                                          |      |
| Pc_TC055781 | 1.44  | 0.03  | Up   | 1.19  | 0.12      |      |  | -1.15     | 0.35 |      | 0.01  | 1     |      | Expressed protein                                                          |      |
| Pc_TC055805 | 4.08  | 0     | Up   | 0     | 0.48      |      |  | 3.2       | 0.06 |      | 2.21  | 0.17  |      | Expressed protein                                                          |      |
| Pc_TC055807 | 5.29  | 0     | Up   | 0     | 1         |      |  | 5.41      | 0    | Up   | 4.58  | 0.01  | Up   | Expressed protein                                                          |      |
| Pc_TC055818 | 0     | 0.64  |      | 1.06  | 0.8       |      |  | 5.34      | 0    | Up   | 3.48  | 0.02  | Up   | Expressed protein                                                          |      |
| Pc_TC055839 | -1.24 | 0.67  |      | -1.26 | 0.7       |      |  | -0.01     | 1    |      | 2.63  | 0.03  | Up   | Putative uncharacterized protein                                           |      |
| Pc_TC055864 | 0.98  | 0.12  |      | 2.27  | 0         | Up   |  | 0.44      | 0.7  |      | 0.7   | 0.35  |      | Expressed protein                                                          |      |
| Pc_TC055867 | 0     | 0.16  |      | -1.53 | 0.58      |      |  | 3.47      | 0.01 | Up   | 0.74  | 0.67  |      | Expressed protein                                                          |      |
| Pc_TC055879 | 0.66  | 0.81  |      | 2.92  | 0.03      | Up   |  | 0         | 0.26 |      | 0.21  | 1     |      | Uncharacterized protein                                                    |      |
| Pc_TC055887 | 2.59  | 0     | Up   | 0     | 0.07      |      |  | 1.04      | 0.5  |      | -0.53 | 0.77  |      | Expressed protein                                                          |      |
| Pc_TC055927 | 2.23  | ##### | Up   | 0     | 1.76E-006 |      |  | 1.52      | 0.16 |      | 0.32  | 0.69  |      | high mobility group B1                                                     | HMG  |
| Pc_TC055935 | -0.68 | 0.54  |      | -1.4  | 0.28      |      |  | -4.96     | 0.02 | Down | -1.66 | 0.17  |      | Expressed protein                                                          |      |
| Pc_TC055968 | 0     | ##### |      | -7.59 | 4.17E-014 | Down |  | 2.91E-009 |      |      | 0     | ##### |      | calmodulin-like 11                                                         |      |
| Pc_TC055969 | -0.11 | 1     |      | 0.64  | 0.71      |      |  | 4.58      | 0    | Up   | 3.18  | 0     | Up   | Expressed protein                                                          |      |
| Pc_TC055977 | -0.06 | 0.93  |      | 0.36  | 0.59      |      |  | -3.72     | 0    | Down | -2.64 | 0     | Down | Expressed protein                                                          |      |
| Pc_TC055983 | -3.83 | 0.04  | Down | -1.53 | 0.32      |      |  | -0.08     | 1    |      | -0.28 | 0.87  |      | Putative uncharacterized protein                                           |      |
| Pc_TC056058 | 3.6   | 0     | Up   | 0     | 0.36      |      |  | 1.67      | 0.38 |      | 0.95  | 0.64  |      | pyrroline-5- carboxylate (P5C) reductase                                   |      |
| Pc_TC056069 | 4.54  | 0     | Up   | 0     | 0.67      |      |  | 3.31      | 0.08 |      | 2.43  | 0.19  |      | 26S proteasome regulatory complex,non-ATPase subcomplex,Rpn2/Psmd1 subunit |      |
| Pc_TC056080 | 3.6   | 0.01  | Up   | 3.45  | 0.03      | Up   |  | 0.5       | 1    |      | -0.37 | 1     |      | Expressed protein                                                          |      |
| Pc_TC056101 | -0.17 | 0.87  |      | -3.19 | 0.01      | Down |  | -0.22     | 0.88 |      | -3.3  | 0.01  | Down | Expressed protein                                                          |      |
| Pc_TC056108 | 2.33  | 0     | Up   | 0     | 0         |      |  | 1.38      | 0.23 |      | -0.74 | 0.46  |      | prohibitin 2                                                               |      |
| Pc_TC056127 | -0.73 | 0.76  |      | 2.77  | 0.01      | Up   |  | -0.3      | 0.95 |      | -1.6  | 0.44  |      | Expressed protein                                                          |      |
| Pc_TC056136 | 2.4   | 0.01  | Up   | 2.15  | 0.06      |      |  | -1.91     | 0.4  |      | 1.71  | 0.15  |      | Expressed protein                                                          |      |
| Pc_TC056137 | 0.4   | 0.53  |      | 1.13  | 0.11      |      |  | -3.06     | 0.02 | Down | -0.92 | 0.26  |      | Expressed protein                                                          |      |
| Pc_TC056154 | 3.08  | 0.02  | Up   | 0     | 0.48      |      |  | 1.92      | 0.35 |      | 1.63  | 0.38  |      | acyl-CoA oxidase 4                                                         |      |
| Pc_TC056159 | 2.92  | 0     | Up   | 0.57  | 0.66      |      |  | 0.91      | 0.53 |      | 2.99  | 0     | Up   | Cyst nematode resistance protein-like protein                              |      |
| Pc_TC056161 | 0.26  | 0.87  |      | 0.8   | 0.49      |      |  | 2.07      | 0.1  |      | 2.04  | 0.03  | Up   | Putative uncharacterized protein                                           |      |
| Pc_TC056190 | -1.18 | 0.05  |      | -1.74 | 0.02      | Down |  | -1.39     | 0.2  |      | -2.33 | 0     | Down | FAR1-related sequence 7                                                    | FAR1 |
| Pc_TC056204 | 0.08  | 0.96  |      | -0.27 | 0.81      |      |  | 0         | 0    |      | -2.29 | 0.04  | Down | Expressed protein                                                          |      |
| Pc_TC056206 | 4.25  | 0.01  | Up   | 0     | 1         |      |  | 3.2       | 0.21 |      | 2.63  | 0.32  |      | Expressed protein                                                          |      |
| Pc_TC056212 | 2.4   | 0.4   |      | 4.38  | 0.02      | Up   |  | 0         | 0.87 |      | 0.63  | 1     |      | Expressed protein                                                          |      |
| Pc_TC056236 | -1.34 | 0.06  |      | -2.13 | 0.02      | Down |  | -0.13     | 0.91 |      | 0.05  | 0.96  |      | Expressed protein                                                          |      |
| Pc_TC056258 | 0.93  | 0.44  |      | 2.57  | 0.01      | Up   |  | -0.36     | 0.89 |      | -0.11 | 1     |      | Putative uncharacterized protein B1047H05.30                               |      |
| Pc_TC056264 | -0.29 | 0.65  |      | 1.07  | 0.1       |      |  | -1.89     | 0.1  |      | -2.34 | 0     | Down | Symbols: CHR5                                                              | SNF2 |
| Pc_TC056287 | 1.4   | 0.23  |      | 0     | 0.11      |      |  | 1.31      | 0.41 |      | 2.51  | 0.02  | Up   | Expressed protein                                                          |      |
| Pc_TC056330 | 1.03  | 0.31  |      | 2.11  | 0.03      | Up   |  | 0.98      | 0.49 |      | 1.14  | 0.29  |      | Expressed protein                                                          |      |
| Pc_TC056336 | -2.98 | 0     | Down | -1.06 | 0.26      |      |  | -1.62     | 0.21 |      | -1.77 | 0.07  |      | Expressed protein                                                          |      |
| Pc_TC056343 | 2.54  | 0.05  | Up   | 2.23  | 0.13      |      |  | -2.5      | 0.48 |      | -0.37 | 0.99  |      | Expressed protein                                                          |      |
| Pc_TC056349 | 1.79  | 0.02  | Up   | 0     | 0         |      |  | 1.09      | 0.38 |      | -0.16 | 0.91  |      | Expressed protein                                                          |      |
| Pc_TC056350 | 3.44  | 0     | Up   | 0     | 0.36      |      |  | 2.55      | 0.12 |      | 1.95  | 0.19  |      | adenylate kinase 1                                                         |      |
| Pc_TC056435 | 2.96  | 0     | Up   | 0     | 0.11      |      |  | 3.78      | 0    | Up   | 1.43  | 0.25  |      | Expressed protein                                                          |      |
| Pc_TC056444 | 2.29  | 0.01  | Up   | 0     | 0.02      |      |  | 1.85      | 0.16 |      | 1.1   | 0.3   |      | Expressed protein                                                          |      |
| Pc_TC056508 | 1.64  | 0.04  | Up   | 0.85  | 0.4       |      |  | -0.2      | 0.91 |      | -0.13 | 0.94  |      | AMP-dependent synthetase and ligase family protein                         |      |
| Pc_TC056526 | 1.77  | 0.02  | Up   | 0.62  | 0.54      |      |  | 2.34      | 0.05 | Up   | -0.16 | 0.91  |      | Expressed protein                                                          |      |
| Pc_TC056528 | 4.25  | 0.01  | Up   | 3.06  | 0.22      |      |  | 2.09      | 0.56 |      | 2.21  | 0.47  |      | Expressed protein                                                          |      |
| Pc_TC056572 | -1.1  | 0.01  | Down | -1.02 | 0.06      |      |  | 0.6       | 0.51 |      | 0.04  | 0.95  |      | Expressed protein                                                          |      |
| Pc_TC056625 | -0.22 | 0.61  |      | -1.24 | 0.03      | Down |  | 0.16      | 0.86 |      | -0.18 | 0.76  |      | Expressed protein                                                          |      |
| Pc_TC056635 | 4.78  | 0     | Up   | 0     | 1         |      |  | 4.86      | 0.01 | Up   | 2.43  | 0.39  |      | Expressed protein                                                          |      |
| Pc_TC056639 | 1.89  | 0.19  |      | 0.64  | 0.84      |      |  | 2.2       | 0.2  |      | 2.67  | 0.04  | Up   | Glycosyl hydrolase family 31 protein                                       |      |
| Pc_TC056650 | -0.18 | 0.92  |      | -0.53 | 0.71      |      |  | 3.59      | 0    | Up   | 2.1   | 0.02  | Up   | Expressed protein                                                          |      |
| Pc_TC056661 | 2.08  | 0     | Up   | 0     | 0         |      |  | 2.4       | 0.03 | Up   | 0.5   | 0.58  |      | vacuolar ATPase subunit F family protein                                   |      |



|             |       |       |      |       |           |      |       |      |       |       |      |                                                       |                                           |
|-------------|-------|-------|------|-------|-----------|------|-------|------|-------|-------|------|-------------------------------------------------------|-------------------------------------------|
| Pc_TC056671 | 1.08  | 0.77  |      | 3.52  | 0.03      | Up   | 0     | 0.53 | 0     | 0.54  |      | cDNA clone:001-112-B09,full insert sequence           |                                           |
| Pc_TC056672 | 0.38  | 0.61  |      | -0.64 | 0.48      |      | 1.21  | 0.28 | 1.69  | 0.02  | Up   | Expressed protein                                     |                                           |
| Pc_TC056673 | -3.62 | 0.01  | Down | 0.72  | 0.46      |      | -2.61 | 0.1  | -3.08 | 0.02  | Down | heat shock protein 81-2                               |                                           |
| Pc_TC056674 | 0     | 0.31  |      | 2.92  | 0.03      | Up   | 0     | 0.26 | 0     | 0.24  |      | Expressed protein                                     |                                           |
| Pc_TC056679 | 1.44  | 0.24  |      | 2.46  | 0.03      | Up   | 0.87  | 0.64 | 1.34  | 0.31  |      | Expressed protein                                     |                                           |
| Pc_TC056684 | 3.17  | 0.04  | Up   | 3.52  | 0.03      | Up   | 0.83  | 0.88 | 3.08  | 0.06  |      | Protein of unknown function (DUF1262)                 |                                           |
| Pc_TC056724 | 2.18  | 0.01  | Up   | 0.71  | 0.56      |      | -0.22 | 0.93 | 1.28  | 0.22  |      | Ca-2+ dependent nuclease                              |                                           |
| Pc_TC056730 | 0     | 0.64  |      | 2.23  | 0.29      |      | 4.34  | 0.01 | Up    | 3.63  | 0.01 | Up                                                    | glutamine-dependent asparagine synthase 1 |
| Pc_TC056733 | 1.82  | 0.01  | Up   | 0     | 0         |      | 1.56  | 0.17 | -0.15 | 0.9   |      | Ribosomal protein S26e family protein                 |                                           |
| Pc_TC056788 | 1.49  | 0.44  |      | 3.12  | 0.03      | Up   | -1.08 | 0.83 | -0.37 | 1     |      | Expressed protein                                     |                                           |
| Pc_TC056798 | 3.4   | 0.02  | Up   | 0     | 0.67      |      | 0.09  | 1    | 1.43  | 0.58  |      | Expressed protein                                     |                                           |
| Pc_TC056810 | 2.72  | 0     | Up   | 0     | 0.11      |      | 1.9   | 0.2  | 0.63  | 0.69  |      | Expressed protein                                     |                                           |
| Pc_TC056820 | 1.49  | 0.25  |      | 3.36  | 0         | Up   | 1.87  | 0.24 | 1.56  | 0.25  |      | Expressed protein                                     |                                           |
| Pc_TC056841 | 2.04  | 0.03  | Up   | 1.26  | 0.3       |      | -0.5  | 0.82 | 0     | 0.03  |      | Expressed protein                                     |                                           |
| Pc_TC056877 | 1.6   | 0     | Up   | 2.2   | 0         | Up   | -0.87 | 0.44 | 0.39  | 0.6   |      | Uncharacterized protein                               |                                           |
| Pc_TC056878 | -3.54 | ##### | Down | -2.42 | 7.36E-005 | Down | -0.03 | 0.98 | -0.69 | 0.25  |      | Uncharacterized protein                               |                                           |
| Pc_TC056891 | 1.83  | 0.09  |      | 2.55  | 0.02      | Up   | 1.09  | 0.51 | 2.15  | 0.05  |      | Expressed protein                                     |                                           |
| Pc_TC056921 | 2.29  | 0.02  | Up   | 2.19  | 0.06      |      | 0.9   | 0.61 | 1.67  | 0.16  |      | Expressed protein                                     |                                           |
| Pc_TC056933 | 2.08  | 0.13  |      | 2.87  | 0.03      | Up   | 0.83  | 0.75 | 1.08  | 0.57  |      | Expressed protein                                     |                                           |
| Pc_TC056941 | 3.89  | 0.04  | Up   | 2.06  | 0.59      |      | 2.09  | 0.56 | 2.43  | 0.39  |      | Expressed protein                                     |                                           |
| Pc_TC056971 | -1.77 | 0.18  |      | -1.53 | 0.28      |      | -2.08 | 0.21 | -4.54 | 0.01  | Down | Expressed protein                                     |                                           |
| Pc_TC056976 | 1.66  | 0.08  |      | 2.4   | 0.01      | Up   | -0.38 | 0.86 | -0.37 | 0.83  |      | Expressed protein                                     |                                           |
| Pc_TC056984 | 2.89  | 0     | Up   | 0     | 0.2       |      | 2.05  | 0.19 | 1.13  | 0.45  |      | Expressed protein                                     |                                           |
| Pc_TC057018 | 1.66  | 0.48  |      | 3.64  | 0.02      | Up   | 0     | 0.53 | 1.43  | 0.58  |      | Expressed protein                                     |                                           |
| Pc_TC057054 | 2.17  | 0.03  | Up   | 0     | 0.11      |      | 1.59  | 0.3  | 1.02  | 0.45  |      | Expressed protein                                     |                                           |
| Pc_TC057055 | 4.17  | 0     | Up   | 0     | 0.67      |      | 3.5   | 0.06 | -0.37 | 1     |      | ferrochelatase 2                                      |                                           |
| Pc_TC057089 | 0.17  | 0.85  |      | 1.07  | 0.18      |      | -3.7  | 0.01 | Down  | -1.65 | 0.09 | Expressed protein                                     |                                           |
| Pc_TC057112 | 0.1   | 0.9   |      | 1.1   | 0.12      |      | -1.88 | 0.12 | -2.39 | 0.01  | Down | Expressed protein                                     |                                           |
| Pc_TC057122 | -0.11 | 0.99  |      | 0.64  | 0.59      |      | -4.5  | 0.04 | Down  | -1.2  | 0.37 | Expressed protein                                     |                                           |
| Pc_TC057148 | -0.03 | 0.96  |      | 0.2   | 0.77      |      | -3.81 | 0    | Down  | -1.99 | 0.01 | Down                                                  | Expressed protein                         |
| Pc_TC057179 | 0     | 0.64  |      | 3.31  | 0.04      | Up   | 1.09  | 0.77 | -0.37 | 1     |      | Expressed protein                                     |                                           |
| Pc_TC057202 | 3.29  | 0     | Up   | 0     | 0.36      |      | 3.09  | 0.05 | Up    | 0.21  | 1    | Expressed protein                                     |                                           |
| Pc_TC057212 | 3.94  | 0     | Up   | 0     | 0.67      |      | 0.5   | 1    | 0     | 0.54  |      | Expressed protein                                     |                                           |
| Pc_TC057223 | 5.12  | ##### | Up   | 0     | 0.67      |      | 4.18  | 0.02 | Up    | 3.02  | 0.07 | Uncharacterized protein                               |                                           |
| Pc_TC057230 | 0.82  | 0.47  |      | 0.64  | 0.63      |      | 1.9   | 0.16 | 2.02  | 0.04  | Up   | Expressed protein                                     |                                           |
| Pc_TC057234 | 1.12  | 0.04  | Up   | 0.92  | 0.17      |      | -1.3  | 0.24 | -0.08 | 0.93  |      | Expressed protein                                     |                                           |
| Pc_TC057296 | 2.08  | 0.1   |      | 3.69  | 0         | Up   | 0.18  | 1    | 1.11  | 0.5   |      | Expressed protein                                     |                                           |
| Pc_TC057307 | 4.33  | 0.01  | Up   | 0     | 1         |      | 4.46  | 0.03 | Up    | 3.43  | 0.1  | Ras-related small GTP-binding family protein          |                                           |
| Pc_TC057352 | 0     | 0     |      | 0     | 0         |      | -2.37 | 0.14 | -3.83 | 0.01  | Down | glyceraldehyde-3-phosphate dehydrogenase of plastid 1 |                                           |
| Pc_TC057378 | 0     | 0.64  |      | 0     | 0.67      |      | 4.57  | 0.01 | Up    | 0     | 0.54 | Expressed protein                                     |                                           |
| Pc_TC057383 | 0.51  | 0.24  |      | 0.71  | 0.18      |      | -2.78 | 0.01 | Down  | -1.61 | 0.01 | Down                                                  | Expressed protein                         |
| Pc_TC057401 | 1.95  | 0.03  | Up   | 0     | 0.04      |      | 1.2   | 0.4  | -1.96 | 0.22  |      | ARM repeat superfamily protein                        |                                           |
| Pc_TC057458 | -2.23 | 0     | Down | -2.16 | 0.02      | Down | 0.05  | 0.97 | -0.29 | 0.72  |      | Expressed protein                                     |                                           |
| Pc_TC057465 | 5.49  | ##### | Up   | 0     | 0.67      |      | 2.9   | 0.15 | 1.21  | 0.69  |      | Expressed protein                                     |                                           |
| Pc_TC057473 | -1.77 | 0.18  |      | 0.28  | 0.84      |      | 3.04  | 0.01 | Up    | 2.14  | 0.02 | Up                                                    | Expressed protein                         |
| Pc_TC057493 | 4.47  | 0.01  | Up   | 0     | 1         |      | 2.31  | 0.48 | 4.15  | 0.02  | Up   | Expressed protein                                     |                                           |
| Pc_TC057527 | 3.99  | 0.03  | Up   | 0     | 1         |      | 2.31  | 0.48 | 0     | 0.9   |      | Expressed protein                                     |                                           |
| Pc_TC057536 | 0.28  | 0.38  |      | -0.14 | 0.74      |      | -2.36 | 0.01 | Down  | -1.32 | 0.01 | Down                                                  | Expressed protein                         |
| Pc_TC057553 | 3.54  | 0.01  | Up   | 0.06  | 1         |      | 3.59  | 0.05 | Up    | 1.21  | 0.69 | Expressed protein                                     |                                           |
| Pc_TC057558 | 4.89  | 0     | Up   | 0     | 1         |      | 4.41  | 0.03 | Up    | 0.63  | 1    | Expressed protein                                     |                                           |
| Pc_TC057566 | -0.11 | 1     |      | 0.38  | 0.87      |      | 0.2   | 0.97 | 2.56  | 0.02  | Up   | Expressed protein                                     |                                           |
| Pc_TC057571 | 3.89  | 0.04  | Up   | 0     | 1         |      | 3.31  | 0.19 | 2.21  | 0.47  |      | Expressed protein                                     |                                           |
| Pc_TC057591 | 1.08  | 0.47  |      | 2.6   | 0.03      | Up   | -2.08 | 0.43 | 0     | 0.11  |      | Expressed protein                                     |                                           |
| Pc_TC057625 | 0.17  | 0.72  |      | 0.8   | 0.15      |      | -2.66 | 0.01 | Down  | -1.66 | 0.01 | Down                                                  | Expressed protein                         |
| Pc_TC057626 | 1.76  | 0.05  | Up   | 1.25  | 0.25      |      | 1.05  | 0.46 | 1.57  | 0.12  |      | Expressed protein                                     |                                           |
| Pc_TC057684 | 3.83  | 0     | Up   | 0     | 0.67      |      | 2.67  | 0.2  | 0.95  | 0.81  |      | Expressed protein                                     |                                           |
| Pc_TC057697 | -2.11 | 0.01  | Down | 0     | 1.76E-006 |      | -1.16 | 0.32 | -2.32 | 0.01  | Down | Expressed protein                                     |                                           |
| Pc_TC057744 | 4.03  | 0     | Up   | 0     | 0.67      |      | 2.9   | 0.15 | -0.37 | 1     |      | Expressed protein                                     |                                           |
| Pc_TC057749 | -0.1  | 0.86  |      | 0.99  | 0.1       |      | -2.27 | 0.04 | Down  | -1.46 | 0.04 | Down                                                  | Expressed protein                         |
| Pc_TC057766 | 0.23  | 0.71  |      | 0.68  | 0.33      |      | -1.85 | 0.11 | -1.91 | 0.02  | Down | Expressed protein                                     |                                           |
| Pc_TC057777 | -0.42 | 0.26  |      | -1.05 | 0.03      | Down | 1.34  | 0.12 | 0.45  | 0.39  |      | Uncharacterized protein                               |                                           |
| Pc_TC057798 | 0.54  | 0.63  |      | 2.21  | 0.02      | Up   | -0.25 | 0.9  | 0.48  | 0.69  |      | Expressed protein                                     |                                           |

|             |       |       |      |       |           |      |       |           |      |       |       |      |                                                         |
|-------------|-------|-------|------|-------|-----------|------|-------|-----------|------|-------|-------|------|---------------------------------------------------------|
| Pc_TC057808 | -0.66 | 0.47  |      | 0.36  | 0.72      |      | -1.04 | 0.43      |      | -2.18 | 0.05  | Down | Uncharacterized protein                                 |
| Pc_TC057810 | 0.08  | 1     |      | 0.91  | 0.65      |      | 3.23  | 0.03      | Up   | -1.11 | 0.68  |      | Expressed protein                                       |
| Pc_TC057830 | 2.86  | 0     | Up   | 0     | 0.11      |      | 1.36  | 0.39      |      | 0.08  | 1     |      | 26S proteasome regulatory subunit,putative (RPN5)       |
| Pc_TC057850 | 1.46  | 0.32  |      | 2.78  | 0.02      | Up   | -0.01 | 1         |      | 0.76  | 0.7   |      | UniRef100                                               |
| Pc_TC057884 | 2.13  | 0.01  | Up   | 0     | 0.02      |      | 2.21  | 0.08      |      | 0.72  | 0.53  |      | Expressed protein                                       |
| Pc_TC057898 | 0.35  | 0.55  |      | 1.53  | 0.02      | Up   | -4.2  | 0         | Down | -2.75 | 0     | Down | Expressed protein                                       |
| Pc_TC057899 | 0.32  | 0.69  |      | 1.62  | 0.04      | Up   | -0.96 | 0.45      |      | -0.7  | 0.45  |      | Expressed protein                                       |
| Pc_TC057929 | -0.21 | 0.77  |      | -0.29 | 0.72      |      | -1.97 | 0.1       |      | -2.15 | 0.01  | Down | Glutathione reductase,cytosolic                         |
| Pc_TC057935 | 4.35  | ##### | Up   | 0     | 0.36      |      | 2.41  | 0.15      |      | -2.37 | 0.46  |      | xylem cysteine peptidase 2                              |
| Pc_TC057951 | 4.21  | 0     | Up   | 0     | 0.67      |      | 2.9   | 0.15      |      | 1.95  | 0.36  |      | Expressed protein                                       |
| Pc_TC057955 | 3.08  | 0.18  |      | 4.06  | 0.04      | Up   | 0     | 0.87      |      | 0     | 0.9   |      | Expressed protein                                       |
| Pc_TC058010 | -0.92 | 0.83  |      | -0.94 | 0.84      |      | 3.2   | 0.04      | Up   | 2.02  | 0.17  |      | OSJNBb0072N21.4 protein                                 |
| Pc_TC058019 | -0.93 | 0.05  |      | -1.15 | 0.05      | Down | -3.76 | 0         | Down | -4.14 | ##### | Down | Expressed protein                                       |
| Pc_TC058026 | 0.29  | 0.52  |      | 0.44  | 0.43      |      | -3.48 | 0         | Down | -1.67 | 0.01  | Down | Expressed protein                                       |
| Pc_TC058031 | 0.19  | 0.81  |      | 0.99  | 0.19      |      | 0     | 6.79E-005 |      | -3.59 | 0     | Down | Expressed protein                                       |
| Pc_TC058046 | -0.94 | 0.07  |      | 0     | 1.88E-014 |      | -0.74 | 0.46      |      | -2.92 | ##### | Down | Expressed protein                                       |
| Pc_TC058100 | -1.44 | 0.24  |      | -0.18 | 0.93      |      | -3.82 | 0.04      | Down | -1.7  | 0.18  |      | Expressed protein                                       |
| Pc_TC058109 | 3.08  | 0.01  | Up   | 0     | 0.36      |      | 1.83  | 0.32      |      | -0.37 | 0.99  |      | organic cation/carnitine transporter4                   |
| Pc_TC058124 | 1.49  | 0.25  |      | 3.17  | 0         | Up   | 1.31  | 0.45      |      | 1.8   | 0.16  |      | Uncharacterized protein                                 |
| Pc_TC058126 | -0.07 | 0.96  |      | 1.57  | 0.04      | Up   | -3.85 | 0.01      | Down | -4.05 | 0     | Down | Expressed protein                                       |
| Pc_TC058142 | -0.94 | 0.05  |      | -1.25 | 0.03      | Down | 1.26  | 0.17      |      | 0.47  | 0.42  |      | Expressed protein                                       |
| Pc_TC058145 | 0.56  | 0.48  |      | 1.27  | 0.13      |      | -3.04 | 0.04      | Down | -1.5  | 0.15  |      | Tetratricopeptide repeat (TPR)-like superfamily protein |
| Pc_TC058159 | 0.66  | 0.97  |      | 3.31  | 0.04      | Up   | 0     | 0.53      |      | 0     | 0.54  |      | Expressed protein                                       |
| Pc_TC058167 | 0.08  | 1     |      | 0.64  | 0.76      |      | 3.55  | 0.01      | Up   | 2.13  | 0.08  |      | Expressed protein                                       |
| Pc_TC058180 | 2.78  | 0.02  | Up   | 0     | 0.36      |      | 2.59  | 0.12      |      | 0.95  | 0.64  |      | F-box family protein                                    |
| Pc_TC058183 | 1.82  | 0.04  | Up   | 0     | 0.02      |      | 0.81  | 0.58      |      | -1.7  | 0.23  |      | Expressed protein                                       |
| Pc_TC058184 | 1.91  | 0     | Up   | 0     | 5.26E-008 |      | 1.78  | 0.08      |      | 0.22  | 0.77  |      | catalase 1                                              |
| Pc_TC058196 | -0.24 | 1     |      | 0.74  | 0.74      |      | 3.14  | 0.03      | Up   | 1.11  | 0.5   |      | Expressed protein                                       |
| Pc_TC058254 | 0.08  | 1     |      | 2.87  | 0.11      |      | 4.48  | 0.01      | Up   | 1.21  | 0.69  |      | Expressed protein                                       |
| Pc_TC058275 | 2.08  | 0.3   |      | 0.06  | 1         |      | 2.9   | 0.15      |      | 3.15  | 0.05  | Up   | Expressed protein                                       |
| Pc_TC058280 | 3.08  | 0.05  | Up   | 0     | 0.67      |      | 1.5   | 0.6       |      | 0.95  | 0.81  |      | Expressed protein                                       |
| Pc_TC058304 | 2.08  | 0.54  |      | 4.15  | 0.03      | Up   | 0     | 0.87      |      | 0     | 0.9   |      | Expressed protein                                       |
| Pc_TC058345 | 0.42  | 0.37  |      | 0.4   | 0.49      |      | -3.83 | 0         | Down | -1.95 | 0     | Down | Expressed protein                                       |
| Pc_TC058346 | 0.32  | 0.35  |      | 0.76  | 0.08      |      | -3.01 | 0         | Down | -0.77 | 0.15  |      | Expressed protein                                       |
| Pc_TC058363 | -0.51 | 0.89  |      | 2.47  | 0.04      | Up   | -1.08 | 0.68      |      | -0.37 | 0.93  |      | 60S acidic ribosomal protein family                     |
| Pc_TC058372 | 0.49  | 0.83  |      | 0.47  | 0.86      |      | 1.62  | 0.33      |      | 2.77  | 0.01  | Up   | Expressed protein                                       |
| Pc_TC058373 | 0.46  | 0.58  |      | 1.99  | 0.01      | Up   | 0.73  | 0.56      |      | -0.42 | 0.69  |      | Expressed protein                                       |
| Pc_TC058381 | 3.29  | 0     | Up   | 0     | 0.36      |      | 2.2   | 0.2       |      | 2.02  | 0.17  |      | Expressed protein                                       |
| Pc_TC058398 | 8.66  | ##### | Up   | 0     | 0.67      |      | 0     | 0.53      |      | 0     | 0.54  |      | Expressed protein                                       |
| Pc_TC058405 | 0.49  | 0.83  |      | 2.47  | 0.04      | Up   | -0.5  | 0.89      |      | 0.04  | 1     |      | Translation elongation factor EF1B,gamma chain          |
| Pc_TC058431 | 0.49  | 0.76  |      | 2.25  | 0.04      | Up   | 0.14  | 1         |      | 0.04  | 1     |      | transcription regulatory protein SNF5,putative (BSH)    |
| Pc_TC058436 | 1.66  | 0.28  |      | 3.23  | 0.01      | Up   | -0.17 | 1         |      | 1.95  | 0.19  |      | Expressed protein                                       |
| Pc_TC058449 | 1.82  | 0.29  |      | 1.93  | 0.29      |      | 3.24  | 0.05      |      | 3.29  | 0.01  | Up   | Expressed protein                                       |
| Pc_TC058458 | 2.95  | 0     | Up   | 0     | 0.04      |      | 3.19  | 0.01      | Up   | 2.33  | 0.02  | Up   | Expressed protein                                       |
| Pc_TC058461 | -1.34 | 0.5   |      | -0.13 | 1         |      | 3.65  | 0.01      | Up   | 1.71  | 0.15  |      | Expressed protein                                       |
| Pc_TC058481 | -0.64 | 0.19  |      | -1.31 | 0.04      | Down | 1.29  | 0.17      |      | 0.54  | 0.37  |      | Expressed protein                                       |
| Pc_TC058492 | 1.08  | 0.65  |      | 3.72  | 0         | Up   | -0.08 | 1         |      | 0.04  | 1     |      | Expressed protein                                       |
| Pc_TC058516 | 3.17  | 0.04  | Up   | 3.64  | 0.02      | Up   | 0     | 0.53      |      | 0.21  | 1     |      | protein,putative,unclassified                           |
| Pc_TC058517 | 0.05  | 0.99  |      | 1.42  | 0.07      |      | -3.96 | 0.01      | Down | -3.03 | 0.01  | Down | Expressed protein                                       |
| Pc_TC058527 | 1.49  | 0.25  |      | 2.8   | 0.02      | Up   | -1.5  | 0.56      |      | -0.37 | 0.93  |      | Uncharacterized protein                                 |
| Pc_TC058528 | 1.89  | 0.01  | Up   | 0     | 0         |      | 1.26  | 0.3       |      | -0.37 | 0.74  |      | Expressed protein                                       |
| Pc_TC058560 | -1.81 | 0.01  | Down | -1.19 | 0.12      |      | 1.26  | 0.22      |      | 0.7   | 0.32  |      | Expressed protein                                       |
| Pc_TC058561 | -1.9  | 0.03  | Down | -0.68 | 0.45      |      | 0.26  | 0.83      |      | -0.6  | 0.5   |      | Expressed protein                                       |
| Pc_TC058600 | -0.34 | 1     |      | 2.7   | 0.05      | Up   | -0.5  | 0.95      |      | 0     | 0.24  |      | Expressed protein                                       |
| Pc_TC058607 | 0     | 0.22  |      | 0     | 0.27      |      | 5.49  | 4.67E-005 | Up   | -1.7  | 0.52  |      | Expressed protein                                       |
| Pc_TC058611 | -3.83 | 0.04  | Down | 0.4   | 0.78      |      | -0.4  | 0.83      |      | -1.47 | 0.29  |      | Expressed protein                                       |
| Pc_TC058631 | 1.89  | 0.19  |      | 1.87  | 0.24      |      | 3.61  | 0.02      | Up   | 2.48  | 0.07  |      | Expressed protein                                       |
| Pc_TC058635 | 1.97  | 0.04  | Up   | 0     | 0.07      |      | 1.88  | 0.18      |      | 0.3   | 0.88  |      | Expressed protein                                       |
| Pc_TC058643 | 0.32  | 0.55  |      | 0.77  | 0.21      |      | -2.23 | 0.04      | Down | -0.41 | 0.55  |      | Expressed protein                                       |
| Pc_TC058650 | 2.56  | 0.03  | Up   | -0.68 | 0.87      |      | 1.27  | 0.5       |      | 2.92  | 0.01  | Up   | Expressed protein                                       |
| Pc_TC058691 | 1.3   | 0.53  |      | 3.23  | 0.02      | Up   | 0.92  | 0.76      |      | 0.04  | 1     |      | Translation protein SH3-like family protein             |
| Pc_TC058696 | -0.18 | 0.74  |      | 1.24  | 0.03      | Up   | -3.85 | 0         | Down | -3.41 | ##### | Down | Expressed protein                                       |

|             |       |       |      |       |           |      |       |      |      |       |      |      |                                                                                         |
|-------------|-------|-------|------|-------|-----------|------|-------|------|------|-------|------|------|-----------------------------------------------------------------------------------------|
| Pc_TC058730 | 2.74  | 0.05  | Up   | 0.47  | 0.98      |      | 2.56  | 0.16 |      | 2.36  | 0.13 |      | Uncharacterized protein                                                                 |
| Pc_TC058739 | -0.2  | 0.82  |      | 1.06  | 0.17      |      | -2.74 | 0.04 | Down | 0.09  | 0.93 |      | Expressed protein                                                                       |
| Pc_TC058740 | 1.85  | 0     | Up   | 1.81  | 0.01      | Up   | -2.52 | 0.06 |      | 0.2   | 0.83 |      | Expressed protein                                                                       |
| Pc_TC058741 | 1.16  | 0.12  |      | 2.8   | 0         | Up   | -0.9  | 0.5  |      | 0.73  | 0.41 |      | Expressed protein                                                                       |
| Pc_TC058742 | 0.96  | 0.02  |      | 0.73  | 0.15      |      | -2.95 | 0    | Down | -0.62 | 0.3  |      | Expressed protein                                                                       |
| Pc_TC058744 | 1.4   | 0.61  |      | 1.06  | 0.8       |      | 3.93  | 0.03 | Up   | 3.08  | 0.06 |      | Expressed protein                                                                       |
| Pc_TC058750 | 0.39  | 0.33  |      | 1.4   | 0         | Up   | -3.7  | 0    | Down | -1.19 | 0.05 | Down | Expressed protein                                                                       |
| Pc_TC058756 | -1.14 | 0.04  | Down | -0.98 | 0.13      |      | 0.86  | 0.38 |      | 0.42  | 0.51 |      | putative,Ty3-gypsy subclass                                                             |
| Pc_TC058763 | 2.3   | 0.04  | Up   | 0     | 0.2       |      | 3.05  | 0.03 | Up   | 1.74  | 0.18 |      | Cox19-like CHCH family protein                                                          |
| Pc_TC058786 | -1.58 | 0.03  | Down | -0.33 | 0.69      |      | -1.12 | 0.33 |      | -1.88 | 0.03 | Down | Expressed protein                                                                       |
| Pc_TC058797 | 3.9   | ##### | Up   | 0     | 0.09      |      | 3.22  | 0.01 | Up   | 2.21  | 0.04 | Up   | NAD(P)-binding Rossmann-fold superfamily protein                                        |
| Pc_TC058852 | -0.16 | 0.82  |      | 0.63  | 0.38      |      | -2.1  | 0.08 |      | -3.42 | 0    | Down | Expressed protein                                                                       |
| Pc_TC058858 | 3.89  | 0     | Up   | 0     | 0.67      |      | 3.15  | 0.1  |      | 0.21  | 1    |      | Granulin repeat cysteine protease family protein                                        |
| Pc_TC058881 | 3.35  | 0.01  | Up   | 0     | 0.48      |      | 1.92  | 0.35 |      | 2.29  | 0.15 |      | Expressed protein                                                                       |
| Pc_TC058890 | 3.08  | 0.05  | Up   | 0     | 0.67      |      | 1.96  | 0.42 |      | 0     | 0.54 |      | Expressed protein                                                                       |
| Pc_TC058931 | 0.95  | 0.54  |      | 2.52  | 0.04      | Up   | 0.38  | 0.91 |      | 0.36  | 0.91 |      | Uncharacterized protein                                                                 |
| Pc_TC058935 | 0.42  | 0.39  |      | 0.75  | 0.2       |      | -2.74 | 0.01 | Down | -2.19 | 0    | Down | Expressed protein                                                                       |
| Pc_TC058936 | 4.21  | 0     | Up   | 3.52  | 0.03      | Up   | 4.59  | 0.01 | Up   | 3.58  | 0.02 | Up   | Expressed protein                                                                       |
| Pc_TC058937 | 3.89  | 0.04  | Up   | 0     | 1         |      | 2.83  | 0.32 |      | 1.63  | 0.71 |      | putative,Ty1-copia subclass                                                             |
| Pc_TC058961 | -0.92 | 0.83  |      | 0.87  | 0.72      |      | 3.31  | 0.03 | Up   | 0.95  | 0.64 |      | Expressed protein                                                                       |
| Pc_TC058963 | 5.4   | ##### | Up   | 0     | 0.15      |      | 1.55  | 0.33 |      | -2.18 | 0.32 |      | Expressed protein                                                                       |
| Pc_TC058981 | -1.95 | 0.03  | Down | -1.63 | 0.11      |      | 1.1   | 0.34 |      | 0.11  | 0.92 |      | Expressed protein                                                                       |
| Pc_TC059010 | 1.8   | 0.02  | Up   | 0     | 0.01      |      | 1.27  | 0.32 |      | -1.37 | 0.27 |      | Expressed protein                                                                       |
| Pc_TC059011 | -0.81 | 0.22  |      | -1.78 | 0.03      | Down | 0.56  | 0.6  |      | 0.55  | 0.44 |      | Expressed protein                                                                       |
| Pc_TC059020 | 2.92  | 0     | Up   | 0     | 0.15      |      | 3.81  | 0    | Up   | 1.57  | 0.21 |      | putative,unclassified                                                                   |
| Pc_TC059029 | 1.4   | 0.61  |      | 0     | 0.67      |      | 4.84  | 0    | Up   | 2.21  | 0.26 |      | Expressed protein                                                                       |
| Pc_TC059044 | 0.29  | 0.56  |      | 0.53  | 0.37      |      | -2.13 | 0.05 | Down | -1.04 | 0.12 |      | Expressed protein                                                                       |
| Pc_TC059061 | 3.69  | 0     | Up   | 0     | 0.36      |      | 4.28  | 0    | Up   | 2.08  | 0.15 |      | Expressed protein                                                                       |
| Pc_TC059101 | 2.54  | 0.05  | Up   | 3.01  | 0.02      | Up   | -1.5  | 0.66 |      | 0.63  | 0.82 |      | Expressed protein                                                                       |
| Pc_TC059107 | 0.66  | 0.81  |      | 2.7   | 0.05      | Up   | 1.5   | 0.45 |      | -0.79 | 0.84 |      | Expressed protein                                                                       |
| Pc_TC059112 | 0     | 1     |      | 0.09  | 0.9       |      | -2.78 | 0.01 | Down | -1.34 | 0.06 |      | Expressed protein                                                                       |
| Pc_TC059122 | 0.99  | 0.45  |      | 0.06  | 1         |      | 2.98  | 0.03 | Up   | 1.58  | 0.19 |      | Expressed protein                                                                       |
| Pc_TC059134 | 2.54  | 0.05  | Up   | 0     | 0.36      |      | 2.55  | 0.12 |      | 0.95  | 0.64 |      | Uncharacterized protein                                                                 |
| Pc_TC059154 | 0.47  | 0.43  |      | 0.17  | 0.83      |      | -1.48 | 0.19 |      | -1.6  | 0.04 | Down | Expressed protein                                                                       |
| Pc_TC059161 | 3.72  | 0     | Up   | 0     | 0.36      |      | 3.34  | 0.03 | Up   | 2.75  | 0.03 | Up   | Uncharacterized protein                                                                 |
| Pc_TC059177 | 2.99  | 0.01  | Up   | 0     | 0.36      |      | 1.96  | 0.27 |      | 0.63  | 0.82 |      | Expressed protein                                                                       |
| Pc_TC059218 | 1.08  | 0.77  |      | 0     | 0.67      |      | 3.9   | 0.03 | Up   | 3.08  | 0.06 |      | Expressed protein                                                                       |
| Pc_TC059287 | 0.08  | 1     |      | -0.94 | 0.84      |      | 3.31  | 0.03 | Up   | 1.95  | 0.19 |      | Expressed protein                                                                       |
| Pc_TC059288 | 1.6   | 0     | Up   | 0     | 2.41E-014 |      | 1.41  | 0.14 |      | -0.27 | 0.68 |      | ribosomal protein S6                                                                    |
| Pc_TC059317 | 0     | 0.64  |      | 0     | 0.67      |      | 4.31  | 0.01 | Up   | 0     | 0.54 |      | Expressed protein                                                                       |
| Pc_TC059326 | -1.24 | 0.08  |      | -0.48 | 0.54      |      | -1.6  | 0.17 |      | -1.65 | 0.04 | Down | Expressed protein                                                                       |
| Pc_TC059335 | 4.4   | 0     | Up   | 0     | 0.67      |      | 2.67  | 0.2  |      | 1.95  | 0.36 |      | Expressed protein                                                                       |
| Pc_TC059337 | 0.89  | 0.68  |      | 1.23  | 0.53      |      | 4.6   | 0    | Up   | 2.98  | 0.02 | Up   | Expressed protein                                                                       |
| Pc_TC059341 | 4.25  | 0.01  | Up   | 2.38  | 0.46      |      | 3.09  | 0.24 |      | 1.21  | 0.89 |      | Expressed protein                                                                       |
| Pc_TC059457 | -0.62 | 0.51  |      | -1.22 | 0.26      |      | -4    | 0.02 | Down | -1.37 | 0.19 |      | Expressed protein                                                                       |
| Pc_TC059500 | 0.76  | 0.71  |      | 2.91  | 0.02      | Up   | 1.57  | 0.37 |      | 1.21  | 0.45 |      | Uncharacterized protein                                                                 |
| Pc_TC059501 | 6.5   | ##### | Up   | 0     | 1         |      | 1.5   | 0.78 |      | 0.63  | 1    |      | Expressed protein                                                                       |
| Pc_TC059508 | 1.08  | 0.77  |      | 1.06  | 0.8       |      | 3.71  | 0.04 | Up   | 3.33  | 0.03 | Up   | Expressed protein                                                                       |
| Pc_TC059519 | 3.25  | 0     | Up   | 0     | 0.2       |      | 1.62  | 0.33 |      | 0.63  | 0.74 |      | deletion of SUV3 suppressor 1(I)                                                        |
| Pc_TC059580 | 2.89  | 0.03  | Up   | 0     | 0.48      |      | 2.38  | 0.2  |      | 2.5   | 0.1  |      | Expressed protein                                                                       |
| Pc_TC059586 | 2.82  | 0.04  | Up   | 0     | 0.48      |      | 1.38  | 0.56 |      | -0.37 | 1    |      | glucose-6-phosphate acetyltransferase 1                                                 |
| Pc_TC059593 | -1.57 | 0.16  |      | -2    | 0.12      |      | 0.41  | 0.77 |      | -4.02 | 0.01 | Down | Expressed protein                                                                       |
| Pc_TC059634 | 0.66  | 0.97  |      | 0     | 0.67      |      | 5.04  | 0    | Up   | 2.08  | 0.3  |      | Expressed protein                                                                       |
| Pc_TC059635 | 2.13  | 0.05  | Up   | 0     | 0.15      |      | 2.48  | 0.09 |      | 1.07  | 0.45 |      | Expressed protein                                                                       |
| Pc_TC059675 | 0.42  | 0.65  |      | -0.39 | 0.75      |      | -4.2  | 0.02 | Down | -2.27 | 0.06 |      | Expressed protein                                                                       |
| Pc_TC059694 | 2.12  | 0.03  | Up   | 1.28  | 0.31      |      | -0.34 | 0.9  |      | 0.85  | 0.53 |      | Expressed protein                                                                       |
| Pc_TC059732 | 0.99  | 0.45  |      | 2.31  | 0.04      | Up   | -0.91 | 0.69 |      | -0.05 | 1    |      | Transporter                                                                             |
| Pc_TC059734 | 2.78  | 0.02  | Up   | 0     | 0.36      |      | 1.5   | 0.45 |      | 0.63  | 0.82 |      | hypoxia-responsive family protein / zinc finger (C3HC4-type RING finger) family protein |
| Pc_TC059735 | 4.03  | 0     | Up   | 0     | 0.67      |      | 1.09  | 0.77 |      | 1.21  | 0.69 |      | Expressed protein                                                                       |
| Pc_TC059747 | 0.66  | 0.81  |      | 2.64  | 0.05      |      | 3.91  | 0.01 | Up   | 2.21  | 0.12 |      | Expressed protein                                                                       |
| Pc_TC059748 | 0.66  | 0.62  |      | -0.68 | 0.73      |      | 2.72  | 0.04 | Up   | 1.35  | 0.24 |      | Expressed protein                                                                       |
| Pc_TC059767 | 0     | 0.16  |      | 0.06  | 1         |      | 3.01  | 0.04 | Up   | 0.21  | 1    |      | Expressed protein                                                                       |

|             |       |       |      |       |           |      |       |           |      |       |       |      |                                                      |
|-------------|-------|-------|------|-------|-----------|------|-------|-----------|------|-------|-------|------|------------------------------------------------------|
| Pc_TC059776 | 0.21  | 0.65  |      | 0.17  | 0.77      |      | -1.29 | 0.2       |      | -1.37 | 0.04  | Down | Expressed protein                                    |
| Pc_TC059790 | 0.14  | 0.88  |      | 0.03  | 1         |      | -2.73 | 0.05      | Down | -1.54 | 0.11  |      | Expressed protein                                    |
| Pc_TC059807 | -0.92 | 0.51  |      | -0.94 | 0.54      |      | 2.66  | 0.03      | Up   | 1.57  | 0.12  |      | Expressed protein                                    |
| Pc_TC059809 | 2.91  | 0     | Up   | 0     | 0.07      |      | 2.11  | 0.12      |      | 1     | 0.42  |      | emp24/gp25L/p24 family/GOLD family protein           |
| Pc_TC059849 | 1.4   | 0.4   |      | -0.36 | 1         |      | 0     | 0.26      |      | 2.8   | 0.03  | Up   | Expressed protein                                    |
| Pc_TC059851 | 0.61  | 0.22  |      | 0.91  | 0.12      |      | -2.3  | 0.03      | Down | 0.8   | 0.21  |      | Expressed protein                                    |
| Pc_TC059863 | 0.73  | 0.65  |      | 2.38  | 0.04      | Up   | -3.3  | 0.23      |      | -2.18 | 0.32  |      | Expressed protein                                    |
| Pc_TC059892 | 0.45  | 0.43  |      | 0.44  | 0.52      |      | -2.5  | 0.03      | Down | -1.99 | 0.01  | Down | zinc finger (C3HC4-type RING finger) family protein  |
| Pc_TC059896 | 0.77  | 0.32  |      | 1.31  | 0.12      |      | -3    | 0.05      | Down | -1.07 | 0.29  |      | Expressed protein                                    |
| Pc_TC059897 | 0.28  | 0.34  |      | 0.57  | 0.13      |      | -2.06 | 0.02      | Down | -0.73 | 0.13  |      | heavy metal atpase 4                                 |
| Pc_TC059899 | 1.43  | 0.16  |      | 2.21  | 0.03      | Up   | 0.5   | 0.78      |      | -1.03 | 0.52  |      | heavy metal atpase 4                                 |
| Pc_TC059900 | 0.67  | 0.23  |      | 1.13  | 0.08      |      | -1.75 | 0.12      |      | -2.02 | 0.01  | Down | heavy metal atpase 4                                 |
| Pc_TC059901 | 0.28  | 0.45  |      | 0.25  | 0.6       |      | -2.33 | 0.01      | Down | -0.84 | 0.13  |      | heavy metal atpase 4                                 |
| Pc_TC059902 | 2.24  | ##### | Up   | 2.38  | 7.39E-005 | Up   | -3.55 | 0         | Down | 0.79  | 0.25  |      | heavy metal atpase 4                                 |
| Pc_TC059903 | -0.18 | 0.69  |      | -0.35 | 0.54      |      | -3.94 | 0         | Down | -1.37 | 0.03  | Down | heavy metal atpase 4                                 |
| Pc_TC059904 | 0.83  | 0.07  |      | 1.37  | 0.01      | Up   | -1.08 | 0.29      |      | -0.76 | 0.25  |      | heavy metal atpase 4                                 |
| Pc_TC059909 | 0.6   | 0.57  |      | 2.17  | 0.02      | Up   | -1.17 | 0.48      |      | -1.79 | 0.2   |      | glucose-6-phosphate dehydrogenase 5                  |
| Pc_TC059916 | -3.73 | 0.05  | Down | -3.75 | 0.07      |      | 1.91  | 0.14      |      | -0.09 | 1     |      | Expressed protein                                    |
| Pc_TC059928 | -0.66 | 0.53  |      | -0.5  | 0.68      |      | 2.41  | 0.04      | Up   | 1.52  | 0.08  |      | Expressed protein                                    |
| Pc_TC059945 | 0.43  | 0.52  |      | 0.7   | 0.36      |      | -2.58 | 0.04      | Down | -0.84 | 0.31  |      | Expressed protein                                    |
| Pc_TC059946 | 2.19  | 0.01  | Up   | 2.12  | 0.04      | Up   | 0.5   | 0.77      |      | -0.64 | 0.68  |      | Expressed protein                                    |
| Pc_TC059948 | 3.1   | 0     | Up   | 0     | 0.09      |      | 2.62  | 0.05      |      | 1.21  | 0.33  |      | Expressed protein                                    |
| Pc_TC059978 | 0.15  | 0.64  |      | -0.12 | 0.78      |      | -1.84 | 0.04      | Down | -0.93 | 0.07  |      | Expressed protein                                    |
| Pc_TC060011 | 0.96  | 0.05  |      | 0     | 1.27E-012 |      | 3.14  | 0         | Up   | -0.65 | 0.33  |      | Expressed protein                                    |
| Pc_TC060020 | 0.07  | 0.93  |      | 0.92  | 0.17      |      | -2.18 | 0.06      |      | -1.63 | 0.04  | Down | Expressed protein                                    |
| Pc_TC060025 | 1.49  | 0.25  |      | 2.33  | 0.06      |      | 1.56  | 0.35      |      | 2.59  | 0.02  | Up   | Expressed protein                                    |
| Pc_TC060036 | -0.42 | 0.61  |      | 1.44  | 0.06      |      | -3.76 | 0.01      | Down | -2.5  | 0.02  | Down | Expressed protein                                    |
| Pc_TC060038 | 3.25  | 0.03  | Up   | 0     | 0.67      |      | 1.83  | 0.47      |      | 1.21  | 0.69  |      | prefoldin 3                                          |
| Pc_TC060045 | -3.83 | 0.04  | Down | -3.85 | 0.06      |      | 0.12  | 0.98      |      | -0.82 | 0.55  |      | Expressed protein                                    |
| Pc_TC060060 | 2.36  | 0.02  | Up   | 0     | 0.11      |      | 2.43  | 0.08      |      | -0.37 | 0.89  |      | Uncharacterized protein                              |
| Pc_TC060082 | 2.89  | 0.08  |      | 4.52  | 0         | Up   | 0     | 0.53      |      | 0.63  | 0.96  |      | GTP binding Elongation factor Tu family protein      |
| Pc_TC060083 | -0.6  | 0.79  |      | 2.23  | 0.05      | Up   | -1.5  | 0.5       |      | -1.79 | 0.36  |      | Expressed protein                                    |
| Pc_TC060084 | 0.71  | 0.26  |      | 0.8   | 0.27      |      | -3.06 | 0.02      | Down | -1.36 | 0.11  |      | Transposable element protein,putative,Transposase 28 |
| Pc_TC060100 | -3.05 | 0.01  | Down | -2.49 | 0.04      | Down | 0.5   | 0.69      |      | -3.18 | 0.01  | Down | Expressed protein                                    |
| Pc_TC060114 | 2.56  | 0.03  | Up   | 0     | 0.27      |      | 2.43  | 0.12      |      | -0.11 | 1     |      | Expressed protein                                    |
| Pc_TC060119 | -0.41 | 0.91  |      | 0.57  | 0.77      |      | 2.8   | 0.05      | Up   | 2.07  | 0.08  |      | Expressed protein                                    |
| Pc_TC060129 | 0.49  | 0.83  |      | 2.93  | 0.01      | Up   | -0.5  | 0.89      |      | -0.64 | 0.81  |      | Expressed protein                                    |
| Pc_TC060139 | 1.08  | 0.77  |      | 0.06  | 1         |      | 4     | 0.02      | Up   | 1.95  | 0.36  |      | Expressed protein                                    |
| Pc_TC060169 | -1.51 | 0.77  |      | 0     | 0.48      |      | 3.94  | 0.01      | Up   | 1.74  | 0.33  |      | Expressed protein                                    |
| Pc_TC060175 | 0.08  | 1     |      | 1.06  | 0.8       |      | 1.5   | 0.6       |      | 3.33  | 0.03  | Up   | Expressed protein                                    |
| Pc_TC060208 | 2.4   | 0.03  | Up   | 0     | 0.2       |      | 0.5   | 0.85      |      | 0.04  | 1     |      | ubiquitin activating enzyme 2                        |
| Pc_TC060213 | 1.71  | 0.03  | Up   | 1.62  | 0.09      |      | -0.1  | 0.98      |      | 0.63  | 0.56  |      | Expressed protein                                    |
| Pc_TC060247 | 1.99  | 0.06  |      | 0.76  | 0.63      |      | 3.09  | 0.02      | Up   | 1.43  | 0.25  |      | Ribonuclease H-like superfamily protein              |
| Pc_TC060265 | -1.41 | 0.33  |      | -2.16 | 0.2       |      | -3.3  | 0.1       |      | -4.18 | 0.03  | Down | Expressed protein                                    |
| Pc_TC060292 | 3.25  | 0.03  | Up   | 3.31  | 0.04      | Up   | 1.5   | 0.6       |      | 2.21  | 0.26  |      | Expressed protein                                    |
| Pc_TC060322 | 0.08  | 1     |      | 3.27  | 0.01      | Up   | 0.83  | 0.75      |      | 0.95  | 0.64  |      | Expressed protein                                    |
| Pc_TC060327 | 3.46  | ##### | Up   | 0     | 0.09      |      | 3.15  | 0.02      | Up   | 2.01  | 0.07  |      | Expressed protein                                    |
| Pc_TC060332 | 0.82  | 0.47  |      | -0.2  | 0.95      |      | 3.37  | 0.01      | Up   | 1.17  | 0.3   |      | Expressed protein                                    |
| Pc_TC060362 | 0.41  | 0.18  |      | 0.44  | 0.27      |      | -1.9  | 0.03      | Down | -1.14 | 0.02  | Down | Uncharacterized protein                              |
| Pc_TC060363 | 0     | 0.99  |      | 0.29  | 0.54      |      | -2.31 | 0.01      | Down | -1.23 | 0.03  | Down | Expressed protein                                    |
| Pc_TC060372 | 1.25  | 0.31  |      | 0.76  | 0.63      |      | 2.93  | 0.03      | Up   | 2.15  | 0.05  |      | Expressed protein                                    |
| Pc_TC060378 | 1.78  | 0.01  | Up   | 0     | 5.43E-005 |      | 1.53  | 0.17      |      | -0.02 | 1     |      | Expressed protein                                    |
| Pc_TC060403 | 0     | ##### |      | 0     | 1.32E-008 |      | -7.42 | 1.40E-005 | Down | 0     | ##### |      | Expressed protein                                    |
| Pc_TC060407 | 4.08  | 0     | Up   | 0     | 0.67      |      | 1.96  | 0.42      |      | 0.63  | 0.96  |      | Uncharacterized protein                              |
| Pc_TC060427 | 4.17  | 0     | Up   | 0     | 0.67      |      | 0     | 0.53      |      | 0     | 0.54  |      | Expressed protein                                    |
| Pc_TC060446 | 4.33  | 0.01  | Up   | 3.87  | 0.06      |      | 0     | 0.87      |      | 1.63  | 0.71  |      | Expressed protein                                    |
| Pc_TC060448 | 2.25  | 0.05  | Up   | 0     | 0.2       |      | 1.78  | 0.27      |      | -1.37 | 0.55  |      | Expressed protein                                    |
| Pc_TC060475 | 0.66  | 0.81  |      | 2.87  | 0.03      | Up   | 0.09  | 1         |      | -1.37 | 0.66  |      | Expressed protein                                    |
| Pc_TC060483 | 2.4   | 0.06  |      | 3.27  | 0.01      | Up   | 2.46  | 0.14      |      | 3.12  | 0.01  | Up   | Small heat shock protein 19.8                        |
| Pc_TC060484 | 5.87  | ##### | Up   | 0     | 0.67      |      | 4.31  | 0.01      | Up   | 1.21  | 0.69  |      | Expressed protein                                    |
| Pc_TC060485 | 2.25  | 0.24  |      | 3.38  | 0.04      | Up   | -0.5  | 1         |      | 0     | 0.54  |      | Expressed protein                                    |
| Pc_TC060487 | 2.6   | 0.04  | Up   | 0     | 0.36      |      | 1.31  | 0.53      |      | -1.37 | 0.66  |      | Expressed protein                                    |

|             |       |       |      |  |       |      |      |  |       |           |      |       |       |      |                                                         |      |
|-------------|-------|-------|------|--|-------|------|------|--|-------|-----------|------|-------|-------|------|---------------------------------------------------------|------|
| Pc_TC060489 | -2.62 | 0.12  |      |  | -2.64 | 0.16 |      |  | 4.73  | 0         | Up   | 3.03  | 0     | Up   | Expressed protein                                       |      |
| Pc_TC060494 | 0.08  | 1     |      |  | 4.06  | 0    | Up   |  | -0.5  | 1         |      | 0     | 0.54  |      | 60S acidic ribosomal protein family                     |      |
| Pc_TC060518 | 0.83  | 0.01  |      |  | 0.43  | 0.27 |      |  | -1.9  | 0.03      | Down | 0.09  | 0.86  |      | Expressed protein                                       |      |
| Pc_TC060574 | 2.66  | 0.12  |      |  | 0     | 0.67 |      |  | 4.06  | 0.02      | Up   | -1.37 | 0.88  |      | Expressed protein                                       |      |
| Pc_TC060578 | 2.84  | 0.01  | Up   |  | 0     | 0.27 |      |  | 0.18  | 1         |      | 0.3   | 0.97  |      | probable small nuclear ribonucleoprotein G              |      |
| Pc_TC060598 | 0.3   | 0.95  |      |  | 0.06  | 1    |      |  | 3.38  | 0.02      | Up   | 0.95  | 0.55  |      | Expressed protein                                       |      |
| Pc_TC060609 | 0.77  | 0.04  |      |  | 0.52  | 0.28 |      |  | -3.16 | 0         | Down | -0.26 | 0.64  |      | Expressed protein                                       |      |
| Pc_TC060617 | 1.78  | 0.23  |      |  | 0.87  | 0.72 |      |  | 1.41  | 0.49      |      | 2.63  | 0.05  | Up   | Expressed protein                                       |      |
| Pc_TC060628 | 0.49  | 0.76  |      |  | 2.5   | 0.02 | Up   |  | 0.79  | 0.64      |      | 2.01  | 0.07  |      | Expressed protein                                       |      |
| Pc_TC060632 | 1.08  | 0.97  |      |  | 4.06  | 0.04 | Up   |  | 3.5   | 0.15      |      | 1.63  | 0.71  |      | Expressed protein                                       |      |
| Pc_TC060633 | -0.81 | 0.58  |      |  | 2.36  | 0.01 | Up   |  | -4.2  | 0.07      |      | -2.08 | 0.19  |      | Expressed protein                                       |      |
| Pc_TC060647 | 0.08  | 1     |      |  | 0     | 1    |      |  | 4.63  | 0.02      | Up   | 2.43  | 0.39  |      | Expressed protein                                       |      |
| Pc_TC060663 | -1.51 | 0.54  |      |  | -0.2  | 1    |      |  | 3.13  | 0.03      | Up   | 1.9   | 0.14  |      | Expressed protein                                       |      |
| Pc_TC060675 | 3.17  | 0     | Up   |  | 2.27  | 0.04 | Up   |  | 1.83  | 0.22      |      | 1.63  | 0.17  |      | laccase 7                                               |      |
| Pc_TC060696 | 0.08  | 1     |      |  | 0.52  | 0.78 |      |  | 3.53  | 0.01      | Up   | 3.38  | 0     | Up   | Expressed protein                                       |      |
| Pc_TC060698 | -0.28 | 0.83  |      |  | 1.64  | 0.07 |      |  | -0.44 | 0.78      |      | -3.31 | 0.02  | Down | Zinc-binding ribosomal protein family protein           |      |
| Pc_TC060706 | 2.54  | 0.05  | Up   |  | 1.38  | 0.45 |      |  | 0.83  | 0.75      |      | 0.95  | 0.64  |      | Expressed protein                                       |      |
| Pc_TC060710 | 0.36  | 0.35  |      |  | 0.69  | 0.15 |      |  | -6.26 | 1.31E-007 | Down | -2.16 | 0     | Down | Expressed protein                                       |      |
| Pc_TC060747 | 0.12  | 0.77  |      |  | 0.05  | 0.93 |      |  | -4.81 | 1.85E-005 | Down | -1.28 | 0.03  | Down | Expressed protein                                       |      |
| Pc_TC060786 | -0.51 | 0.89  |      |  | 2.83  | 0.01 | Up   |  | 0     | 0.14      |      | -0.96 | 0.68  |      | Expressed protein                                       |      |
| Pc_TC060787 | 4.12  | 0     | Up   |  | 0     | 0.67 |      |  | 1.83  | 0.47      |      | -0.37 | 1     |      | Expressed protein                                       |      |
| Pc_TC060792 | -1.24 | 0.37  |      |  | -1.26 | 0.4  |      |  | 0     | 0.02      |      | -4.28 | 0.02  | Down | Expressed protein                                       |      |
| Pc_TC060806 | -1.06 | 0.35  |      |  | 0.24  | 0.86 |      |  | -0.96 | 0.52      |      | -4.83 | 0     | Down | Expressed protein                                       |      |
| Pc_TC060816 | 1.66  | 0.72  |      |  | 4.06  | 0.04 | Up   |  | 1.5   | 0.78      |      | 1.21  | 0.89  |      | Uncharacterized protein                                 |      |
| Pc_TC060819 | 3.08  | 0.05  | Up   |  | 1.38  | 0.65 |      |  | 1.67  | 0.53      |      | 1.21  | 0.69  |      | Expressed protein                                       |      |
| Pc_TC060824 | 1.44  | 0.02  | Up   |  | 0.88  | 0.24 |      |  | 0.02  | 1         |      | 0.03  | 0.99  |      | Na+/H+ antiporter 6                                     |      |
| Pc_TC060825 | 0.25  | 0.65  |      |  | 0.57  | 0.38 |      |  | -2.7  | 0.02      | Down | -1.24 | 0.09  |      | Na+/H+ antiporter 6                                     |      |
| Pc_TC060855 | 2.82  | 0.04  | Up   |  | 0     | 0.48 |      |  | 2.87  | 0.1       |      | 1.21  | 0.58  |      | Expressed protein                                       |      |
| Pc_TC060910 | -1.24 | 0.67  |      |  | 0.74  | 0.74 |      |  | 3.27  | 0.03      | Up   | 2.3   | 0.07  |      | Expressed protein                                       |      |
| Pc_TC060914 | 1.15  | 0.06  |      |  | 0.95  | 0.2  |      |  | 0.76  | 0.49      |      | 1.51  | 0.04  | Up   | Expressed protein                                       |      |
| Pc_TC060916 | 2.78  | 0.01  | Up   |  | 0     | 0.2  |      |  | 2.56  | 0.08      |      | -0.64 | 0.81  |      | alpha/beta-Hydrolases superfamily protein               |      |
| Pc_TC060917 | 3.17  | 0.04  | Up   |  | 0     | 0.67 |      |  | 2.9   | 0.15      |      | 1.21  | 0.69  |      | Expressed protein                                       |      |
| Pc_TC060919 | 0     | 1     |      |  | 0.06  | 1    |      |  | 6.12  | 0         | Up   | 3.53  | 0.09  |      | Granulin repeat cysteine protease family protein        |      |
| Pc_TC060937 | 2.4   | 0.4   |      |  | 0     | 1    |      |  | 3.96  | 0.08      |      | 3.87  | 0.04  | Up   | cytochrome P450, family 711, subfamily A, polypeptide 1 |      |
| Pc_TC060950 | 2.46  | 0     | Up   |  | 0     | 0.01 |      |  | 1.66  | 0.19      |      | 0.16  | 0.93  |      | Expressed protein                                       |      |
| Pc_TC061010 | 1.3   | 0.35  |      |  | 2.72  | 0.02 | Up   |  | -1.08 | 0.68      |      | -0.37 | 0.93  |      | Expressed protein                                       |      |
| Pc_TC061018 | 4.33  | 0     | Up   |  | 0     | 0.67 |      |  | 3.5   | 0.06      |      | 2.08  | 0.3   |      | Transmembrane Fragile-X-F-associated protein            |      |
| Pc_TC061050 | 0.44  | 0.34  |      |  | 0.12  | 0.83 |      |  | -4.66 | 9.56E-005 | Down | -1.94 | 0     | Down | Expressed protein                                       |      |
| Pc_TC061057 | 3.54  | 0.01  | Up   |  | 0     | 0.67 |      |  | 3.03  | 0.12      |      | -1.37 | 0.88  |      | Expressed protein                                       |      |
| Pc_TC061082 | 0.66  | 0.97  |      |  | 4.01  | 0.01 | Up   |  | -1.5  | 0.85      |      | -1.37 | 0.88  |      | Expressed protein                                       |      |
| Pc_TC061106 | 3.08  | 0.05  | Up   |  | 0     | 0.67 |      |  | 2.09  | 0.38      |      | 0     | 0.54  |      | Expressed protein                                       |      |
| Pc_TC061125 | 3.83  | 0     | Up   |  | 0     | 0.36 |      |  | 3.36  | 0.03      | Up   | 1.53  | 0.35  |      | Alpha-helical ferredoxin                                |      |
| Pc_TC061127 | 0.56  | 0.82  |      |  | 2.95  | 0.01 | Up   |  | 7.42  | 1.46E-008 | Up   | 6.09  | ##### | Up   | Leucine-rich repeat (LRR) family protein                |      |
| Pc_TC061135 | 3.4   | 0.1   |      |  | 4.38  | 0.02 | Up   |  | 1.5   | 0.78      |      | 1.63  | 0.71  |      | Expressed protein                                       |      |
| Pc_TC061138 | -3.24 | 0.03  | Down |  | -2.68 | 0.08 |      |  | -2.82 | 0.1       |      | 0     | 0     |      | Uncharacterized protein                                 |      |
| Pc_TC061163 | 4.66  | ##### | Up   |  | 0     | 0.67 |      |  | 3.46  | 0.06      |      | 1.43  | 0.58  |      | GTP binding Elongation factor Tu family protein         |      |
| Pc_TC061176 | 1.37  | 0.18  |      |  | 2.27  | 0.03 | Up   |  | -1.15 | 0.55      |      | -0.83 | 0.6   |      | Expressed protein                                       |      |
| Pc_TC061180 | 1.4   | 0.19  |      |  | 0.74  | 0.6  |      |  | 1.91  | 0.17      |      | 2.08  | 0.05  | Up   | Expressed protein                                       |      |
| Pc_TC061182 | 2.78  | 0.1   |      |  | 2.06  | 0.36 |      |  | 3.83  | 0.03      | Up   | 2.8   | 0.1   |      | Expressed protein                                       |      |
| Pc_TC061219 | 4.08  | 0     | Up   |  | 0     | 0.67 |      |  | 0     | 0.53      |      | 0     | 0.54  |      | Expressed protein                                       |      |
| Pc_TC061228 | 0.08  | 1     |      |  | 3.31  | 0.04 | Up   |  | 3.63  | 0.05      | Up   | 2.43  | 0.19  |      | Expressed protein                                       |      |
| Pc_TC061232 | 0.14  | 0.82  |      |  | 1.49  | 0.02 | Up   |  | -0.99 | 0.36      |      | -0.64 | 0.38  |      | Expressed protein                                       |      |
| Pc_TC061254 | 0.79  | 0.07  |      |  | 1.17  | 0.03 | Up   |  | -7.22 | 1.88E-007 | Down | -2.4  | 0     | Down | Expressed protein                                       |      |
| Pc_TC061275 | 0.38  | 0.74  |      |  | 0.22  | 0.9  |      |  | -4.58 | 0.03      | Down | 0.06  | 1     |      | Expressed protein                                       |      |
| Pc_TC061282 | 0.32  | 0.53  |      |  | 0.81  | 0.17 |      |  | -2.77 | 0.01      | Down | -0.66 | 0.33  |      | Uncharacterized protein                                 |      |
| Pc_TC061283 | -2.29 | 0.04  | Down |  | -0.09 | 0.97 |      |  | 0.13  | 0.94      |      | -0.28 | 0.8   |      | Expressed protein                                       |      |
| Pc_TC061285 | 0     | 0.64  |      |  | 0     | 0.67 |      |  | 4.75  | 0         | Up   | 3.15  | 0.05  | Up   | Expressed protein                                       |      |
| Pc_TC061321 | 3.47  | 0.02  | Up   |  | 0     | 0.67 |      |  | -0.5  | 1         |      | 1.63  | 0.49  |      | ABI3-interacting protein 3                              |      |
| Pc_TC061339 | 0.78  | 0.12  |      |  | 1.41  | 0.02 | Up   |  | -1.35 | 0.2       |      | -0.43 | 0.53  |      | Expressed protein                                       | CCHC |
| Pc_TC061343 | 0     | 0     |      |  | -4.26 | 0.02 | Down |  | 0     | 0.01      |      | -1.24 | 0.31  |      | Ribosomal protein L7Ae/L30e/S12e/Gadd45 family protein  |      |
| Pc_TC061412 | 1.59  | 0.04  | Up   |  | 0     | 0    |      |  | 1.28  | 0.3       |      | -1.08 | 0.33  |      | Expressed protein                                       |      |
| Pc_TC061435 | 0.26  | 0.62  |      |  | 0.8   | 0.19 |      |  | -1.58 | 0.14      |      | -1.39 | 0.05  | Down | Expressed protein                                       |      |

|             |       |       |      |       |           |      |       |           |      |       |       |      |                                                                          |
|-------------|-------|-------|------|-------|-----------|------|-------|-----------|------|-------|-------|------|--------------------------------------------------------------------------|
| Pc_TC061436 | 0.61  | 0.09  |      | 0.44  | 0.33      |      | -2.19 | 0.02      | Down | -1.05 | 0.06  |      | Expressed protein                                                        |
| Pc_TC061446 | 3.25  | 0.01  | Up   | 0     | 0.48      |      | 2.38  | 0.2       |      | 0.36  | 1     |      | Uncharacterized protein                                                  |
| Pc_TC061491 | -0.14 | 0.87  |      | 0.06  | 0.96      |      | -4.5  | 0         | Down | -3.37 | 0     | Down | Expressed protein                                                        |
| Pc_TC061501 | 4.33  | 0.01  | Up   | 0     | 1         |      | 2.31  | 0.48      |      | 1.63  | 0.71  |      | Expressed protein                                                        |
| Pc_TC061513 | 1.22  | 0.44  |      | 2.74  | 0.03      | Up   | -1.82 | 0.53      |      | 0.47  | 0.87  |      | Expressed protein                                                        |
| Pc_TC061523 | 0.39  | 0.67  |      | 1.9   | 0.02      | Up   | -1.9  | 0.19      |      | -0.71 | 0.5   |      | Arabidopsis Inositol phosphorylceramide synthase 1                       |
| Pc_TC061539 | -0.17 | 0.8   |      | 0.13  | 0.87      |      | -1.65 | 0.15      |      | -1.7  | 0.04  | Down | Expressed protein                                                        |
| Pc_TC061540 | -0.6  | 0.66  |      | 0.58  | 0.63      |      | 0     | 0.01      |      | -3.37 | 0.04  | Down | PLC-like phosphodiesterases superfamily protein                          |
| Pc_TC061559 | 0     | 0.12  |      | 0     | 0.15      |      | 3.63  | 0.01      | Up   | 1.86  | 0.12  |      | Expressed protein                                                        |
| Pc_TC061566 | -1.48 | 0.07  |      | -2.29 | 0.02      | Down | 0.44  | 0.71      |      | 0.24  | 0.78  |      | Expressed protein                                                        |
| Pc_TC061568 | -0.51 | 0.89  |      | 3.38  | 0         | Up   | -1.5  | 0.56      |      | 0     | 0.11  |      | GroES-like zinc-binding alcohol dehydrogenase family protein             |
| Pc_TC061578 | -0.99 | 0.39  |      | 0.19  | 0.9       |      | 0.02  | 1         |      | -2.77 | 0.04  | Down | Expressed protein                                                        |
| Pc_TC061581 | -0.06 | 0.93  |      | 0.76  | 0.24      |      | -2.91 | 0.01      | Down | -1.39 | 0.06  |      | Expressed protein                                                        |
| Pc_TC061587 | -0.13 | 0.82  |      | 0.34  | 0.58      |      | -2.5  | 0.02      | Down | -1.68 | 0.02  | Down | Expressed protein                                                        |
| Pc_TC061614 | 0.08  | 1     |      | 0.06  | 1         |      | 3.39  | 0.03      | Up   | 0.95  | 0.64  |      | nodulin MtN21 /EamA-like transporter family protein                      |
| Pc_TC061618 | 0.66  | 0.97  |      | 4.01  | 0.01      | Up   | -1.5  | 0.85      |      | 0     | 0.54  |      | Expressed protein                                                        |
| Pc_TC061673 | 3.54  | 0.08  |      | 0     | 1         |      | 4.26  | 0.05      | Up   | 3.53  | 0.09  |      | Expressed protein                                                        |
| Pc_TC061702 | 3.94  | 0     | Up   | 0     | 0.67      |      | 1.5   | 0.6       |      | 2.53  | 0.16  |      | Expressed protein                                                        |
| Pc_TC061711 | 2.04  | 0.04  | Up   | 0.8   | 0.59      |      | 0.33  | 0.89      |      | 0.91  | 0.49  |      | Expressed protein                                                        |
| Pc_TC061727 | 2.5   | 0.01  | Up   | 0     | 0.11      |      | 1.67  | 0.27      |      | 0.43  | 0.82  |      | Expressed protein                                                        |
| Pc_TC061731 | 0.46  | 0.23  |      | 0.99  | 0.04      |      | -2.12 | 0.03      | Down | 0.37  | 0.5   |      | Uncharacterized protein                                                  |
| Pc_TC061732 | 2.08  | 0.01  | Up   | 0     | 0.01      |      | 1.42  | 0.27      |      | -0.15 | 0.94  |      | Expressed protein                                                        |
| Pc_TC061744 | 3.08  | 0.05  | Up   | 0     | 0.67      |      | 1.83  | 0.47      |      | 1.21  | 0.69  |      | Cornichon family protein                                                 |
| Pc_TC061750 | -0.34 | 1     |      | 2.7   | 0.05      | Up   | 1.09  | 0.63      |      | 1.43  | 0.39  |      | Expressed protein                                                        |
| Pc_TC061752 | 1.34  | 0.37  |      | -0.26 | 1         |      | 2.85  | 0.06      |      | 2.59  | 0.03  | Up   | Expressed protein                                                        |
| Pc_TC061758 | 4.81  | ##### | Up   | 0     | 0.67      |      | 3.5   | 0.06      |      | 0.63  | 0.96  |      | Expressed protein                                                        |
| Pc_TC061763 | 3.4   | 0.02  | Up   | 2.38  | 0.24      |      | -0.5  | 1         |      | 0.21  | 1     |      | Expressed protein                                                        |
| Pc_TC061765 | 1.08  | 0.97  |      | 5.64  | 0         | Up   | 0.5   | 1         |      | 1.21  | 0.89  |      | Myosin heavy chain-like protein (Fragment)                               |
| Pc_TC061766 | 0.03  | 1     |      | -0.77 | 0.47      |      | 2.53  | 0.03      | Up   | 1.75  | 0.03  | Up   | Expressed protein                                                        |
| Pc_TC061788 | 0.12  | 0.77  |      | 0.04  | 0.94      |      | -2.22 | 0.02      | Down | -1.62 | 0.01  | Down | Expressed protein                                                        |
| Pc_TC061797 | 0.83  | 0.05  |      | 0.8   | 0.13      |      | -2.12 | 0.04      | Down | 0.09  | 0.89  |      | Expressed protein                                                        |
| Pc_TC061805 | -2.11 | 0.01  | Down | -0.85 | 0.33      |      | 0.36  | 0.76      |      | -0.54 | 0.52  |      | DNA GYRASE A                                                             |
| Pc_TC061806 | -3.28 | 0     | Down | -1.53 | 0.09      |      | 0.69  | 0.53      |      | -0.02 | 1     |      | DNA GYRASE A                                                             |
| Pc_TC061807 | -0.63 | 0.32  |      | -1.9  | 0.02      | Down | 0.99  | 0.34      |      | 0.26  | 0.73  |      | DNA GYRASE A                                                             |
| Pc_TC061809 | -0.68 | 0.25  |      | -0.86 | 0.22      |      | 1.94  | 0.05      | Up   | 0.97  | 0.14  |      | DNA GYRASE A                                                             |
| Pc_TC061811 | -0.29 | 0.53  |      | -1.07 | 0.07      |      | 1.83  | 0.04      | Up   | 0.75  | 0.19  |      | DNA GYRASE A                                                             |
| Pc_TC061812 | 0.08  | 1     |      | 2.87  | 0.28      |      | 3.09  | 0.24      |      | 3.87  | 0.04  | Up   | Expressed protein                                                        |
| Pc_TC061824 | 0     | ##### |      | 0     | 4.78E-008 |      | -7.24 | 2.64E-005 | Down | -7.12 | ##### | Down | Expressed protein                                                        |
| Pc_TC061833 | 1.32  | 0.02  | Up   | 0     | 3.61E-007 |      | 1.9   | 0.07      |      | -0.36 | 0.65  |      | calmodulin-like domain protein kinase 9                                  |
| Pc_TC061840 | 0     | ##### |      | -4.26 | 0         | Down | 0     | 0         |      | 0     | ##### |      | Expressed protein                                                        |
| Pc_TC061855 | 3.25  | 0.03  | Up   | 0     | 0.67      |      | 2.2   | 0.34      |      | 1.21  | 0.69  |      | Expressed protein                                                        |
| Pc_TC061859 | 5.29  | ##### | Up   | 0     | 0.67      |      | 1.96  | 0.42      |      | -0.37 | 1     |      | Expressed protein                                                        |
| Pc_TC061901 | 2.25  | 0.09  |      | 1.38  | 0.45      |      | 2.96  | 0.06      |      | 3.12  | 0.01  | Up   | Formamidopyrimidine-DNA glycosylase                                      |
| Pc_TC061915 | 1.27  | 0.02  | Up   | 2.3   | 0         | Up   | -5.3  | 0         | Down | -5.18 | ##### | Down | Phosphatidylinositol N-acetylglucosaminyltransferase subunit A           |
| Pc_TC061948 | 0     | 0.31  |      | 0.06  | 1         |      | 2.75  | 0.09      |      | 2.63  | 0.05  | Up   | Expressed protein                                                        |
| Pc_TC061954 | 0.24  | 0.56  |      | 0.5   | 0.32      |      | -2.02 | 0.04      | Down | -0.79 | 0.18  |      | Expressed protein                                                        |
| Pc_TC061964 | 3.47  | 0.02  | Up   | 1.38  | 0.65      |      | 3.5   | 0.06      |      | 4.41  | 0     | Up   | cytochrome oxidase                                                       |
| Pc_TC061999 | 3.08  | 0.01  | Up   | 0     | 0.36      |      | 2.03  | 0.25      |      | 1.33  | 0.44  |      | Expressed protein                                                        |
| Pc_TC062006 | -0.39 | 0.65  |      | -0.24 | 0.82      |      | -4.92 | 0         | Down | -2.8  | 0.01  | Down | Expressed protein                                                        |
| Pc_TC062011 | 3.25  | 0.03  | Up   | 0     | 0.67      |      | 3.5   | 0.06      |      | -0.37 | 1     |      | vacuolar proton ATPase A1                                                |
| Pc_TC062044 | 0.66  | 0.81  |      | 1.52  | 0.39      |      | 2.96  | 0.06      |      | 2.83  | 0.03  | Up   | Expressed protein                                                        |
| Pc_TC062046 | -1.67 | 0.01  | Down | -1.62 | 0.03      | Down | 0.34  | 0.75      |      | -0.61 | 0.41  |      | Expressed protein                                                        |
| Pc_TC062048 | 4.17  | 0.02  | Up   | 0     | 1         |      | 0.5   | 1         |      | -0.37 | 1     |      | Expressed protein                                                        |
| Pc_TC062068 | 3.25  | 0.01  | Up   | 0     | 0.48      |      | 2.09  | 0.29      |      | 1.21  | 0.58  |      | FUS3-complementing gene 2                                                |
| Pc_TC062069 | 1.6   | 0.15  |      | -1.94 | 0.4       |      | 3.19  | 0.02      | Up   | 0.33  | 0.89  |      | Expressed protein                                                        |
| Pc_TC062116 | 3.17  | 0.04  | Up   | 0     | 0.67      |      | 1.67  | 0.53      |      | 0.63  | 0.96  |      | Expressed protein                                                        |
| Pc_TC062151 | 3.89  | 0     | Up   | 0     | 0.67      |      | 3.59  | 0.05      | Up   | 1.95  | 0.36  |      | Expressed protein                                                        |
| Pc_TC062185 | 2.08  | 0     | Up   | 1.67  | 0.04      | Up   | 2.03  | 0.08      |      | 0.74  | 0.42  |      | nucleic acid binding;binding;helicases;ATP binding;DNA binding;helicases |
| Pc_TC062186 | -1.96 | 0.01  | Down | 1.56  | 0.03      | Up   | -1.31 | 0.27      |      | 0.07  | 0.94  |      | nucleic acid binding;binding;helicases;ATP binding;DNA binding;helicases |
| Pc_TC062187 | -2.38 | ##### | Down | -0.48 | 0.42      |      | -0.07 | 0.94      |      | -0.35 | 0.58  |      | nucleic acid binding;binding;helicases;ATP binding;DNA binding;helicases |
| Pc_TC062204 | -0.2  | 0.74  |      | -1.61 | 0.03      | Down | 2.02  | 0.04      | Up   | 1.38  | 0.04  | Up   | Expressed protein                                                        |
| Pc_TC062214 | 1.66  | 0.48  |      | -0.94 | 1         |      | 4.55  | 0.01      | Up   | 3.43  | 0.02  | Up   | Expressed protein                                                        |

|             |       |       |      |       |      |      |       |      |      |       |       |      |                                              |
|-------------|-------|-------|------|-------|------|------|-------|------|------|-------|-------|------|----------------------------------------------|
| Pc_TC062237 | -0.57 | 0.2   |      | -1.32 | 0.02 | Down | 1.38  | 0.13 |      | 0.65  | 0.26  |      | Expressed protein                            |
| Pc_TC062239 | 3.08  | 0     | Up   | 0     | 0.2  |      | 1.96  | 0.21 |      | -0.96 | 0.68  |      | cell division cycle 48                       |
| Pc_TC062244 | 0.08  | 1     |      | 0     | 0.2  |      | 3.41  | 0.02 | Up   | 1.95  | 0.12  |      | Expressed protein                            |
| Pc_TC062245 | 3.89  | 0.04  | Up   | 0     | 1    |      | 4.15  | 0.06 |      | 2.21  | 0.47  |      | Expressed protein                            |
| Pc_TC062255 | 0.4   | 0.96  |      | 3.06  | 0.02 | Up   | 0     | 0.26 |      | 0     | 0.24  |      | Expressed protein                            |
| Pc_TC062271 | -4.45 | 0.01  | Down | 0.49  | 0.65 |      | -0.11 | 0.96 |      | -0.58 | 0.62  |      | Expressed protein                            |
| Pc_TC062273 | 0.8   | 0.22  |      | 0.53  | 0.5  |      | -2.93 | 0.03 | Down | -0.84 | 0.32  |      | Expressed protein                            |
| Pc_TC062274 | 0.7   | 0.54  |      | 1.49  | 0.17 |      | 2.77  | 0.03 | Up   | 1.32  | 0.22  |      | Expressed protein                            |
| Pc_TC062278 | 4.12  | 0     | Up   | 0     | 0.67 |      | 3.75  | 0.04 | Up   | 1.21  | 0.69  |      | Putative uncharacterized protein B1168F12.31 |
| Pc_TC062284 | -1.42 | 0.04  | Down | -2.4  | 0.01 | Down | 1.64  | 0.11 |      | 0.22  | 0.77  |      | Expressed protein                            |
| Pc_TC062297 | 3.02  | 0.02  | Up   | 2.93  | 0.05 | Up   | 0.73  | 0.85 |      | 2.13  | 0.19  |      | Expressed protein                            |
| Pc_TC062305 | 2.49  | 0.02  | Up   | 0     | 0.2  |      | 1.44  | 0.4  |      | 1.21  | 0.41  |      | Expressed protein                            |
| Pc_TC062309 | 1.34  | 0.37  |      | 2.54  | 0.05 | Up   | 1.35  | 0.47 |      | 1     | 0.56  |      | Dihydroxyacetone kinase                      |
| Pc_TC062317 | 0     | 0.64  |      | 0.06  | 1    |      | 3.59  | 0.05 | Up   | 2.63  | 0.14  |      | Expressed protein                            |
| Pc_TC062320 | 0.73  | 0.5   |      | 0.84  | 0.48 |      | 3.22  | 0.01 | Up   | 1.7   | 0.09  |      | Expressed protein                            |
| Pc_TC062323 | 1.95  | 0.1   |      | 2.56  | 0.03 | Up   | -2.08 | 0.43 |      | 1.04  | 0.5   |      | Expressed protein                            |
| Pc_TC062341 | 0     | 0.05  |      | 0     | 0.07 |      | 3.7   | 0    | Up   | 0     | 0.03  |      | Expressed protein                            |
| Pc_TC062351 | 1.25  | 0.48  |      | 3.01  | 0.02 | Up   | -0.5  | 0.95 |      | -0.05 | 1     |      | Expressed protein                            |
| Pc_TC062354 | 1.02  | 0.13  |      | 1.95  | 0.01 | Up   | -1.08 | 0.38 |      | -1    | 0.27  |      | Expressed protein                            |
| Pc_TC062355 | 0.64  | 0.26  |      | 1.81  | 0    | Up   | -3.9  | 0    | Down | -5.78 | ##### | Down | Expressed protein                            |
| Pc_TC062367 | 1.3   | 0.53  |      | 2.93  | 0.05 | Up   | -0.08 | 1    |      | 1.5   | 0.44  |      | Expressed protein                            |
| Pc_TC062369 | 1.49  | 0.13  |      | 3.16  | 0    | Up   | 0.38  | 0.84 |      | -0.37 | 0.83  |      | Ribosomal protein S5 family protein          |
| Pc_TC062376 | 2.54  | 0.02  | Up   | 0     | 0.2  |      | 1.62  | 0.33 |      | 0.85  | 0.61  |      | Expressed protein                            |
| Pc_TC062384 | -0.34 | 0.93  |      | 2.23  | 0.05 | Up   | -0.91 | 0.69 |      | -2.37 | 0.25  |      | Expressed protein                            |
| Pc_TC062391 | 2.49  | 0.02  | Up   | 0     | 0.2  |      | 1.44  | 0.4  |      | -0.37 | 0.93  |      | Cytochrome P450                              |
| Pc_TC062394 | 3.89  | 0.04  | Up   | 0     | 1    |      | 2.31  | 0.48 |      | 2.95  | 0.22  |      | Expressed protein                            |
| Pc_TC062397 | -1.47 | 0.13  |      | -0.75 | 0.47 |      | -3.63 | 0.02 | Down | -1.5  | 0.15  |      | receptor like protein 9                      |
| Pc_TC062398 | 4.25  | 0     | Up   | 0     | 0.67 |      | 1.83  | 0.47 |      | 1.63  | 0.49  |      | Uncharacterized protein                      |
| Pc_TC062419 | -0.66 | 0.5   |      | 0.24  | 0.83 |      | -4.4  | 0.01 | Down | -1.37 | 0.2   |      | Uncharacterized protein                      |
| Pc_TC062447 | 3.78  | 0.05  | Up   | 0     | 1    |      | 3.67  | 0.12 |      | 0.63  | 1     |      | F-box domain containing protein,expressed    |
| Pc_TC062450 | 1.4   | 0.61  |      | 1.38  | 0.65 |      | 3.67  | 0.04 | Up   | 3.08  | 0.06  |      | Expressed protein                            |
| Pc_TC062461 | 0.08  | 1     |      | 1.06  | 0.8  |      | 3.63  | 0.05 | Up   | 2.63  | 0.14  |      | Uncharacterized protein                      |
| Pc_TC062471 | -1.8  | 0     | Down | -2.68 | 0    | Down | 1.53  | 0.12 |      | 0.66  | 0.31  |      | Expressed protein                            |
| Pc_TC062477 | 4.08  | 0     | Up   | 0     | 0.67 |      | 2.5   | 0.25 |      | 0.95  | 0.81  |      | Expressed protein                            |
| Pc_TC062487 | 3.12  | 0.01  | Up   | 0     | 0.36 |      | 2.09  | 0.24 |      | -2.37 | 0.46  |      | Expressed protein                            |
| Pc_TC062493 | 0.4   | 0.96  |      | 0.38  | 0.97 |      | 2.31  | 0.18 |      | 2.83  | 0.03  | Up   | Expressed protein                            |
| Pc_TC062497 | 1.3   | 0.35  |      | 0     | 0.2  |      | 1.92  | 0.23 |      | 2.59  | 0.02  | Up   | Expressed protein                            |
| Pc_TC062515 | -1.32 | 0.04  | Down | 0.34  | 0.62 |      | -0.2  | 0.85 |      | -0.58 | 0.43  |      | Expressed protein                            |
| Pc_TC062571 | 2.08  | 0.13  |      | 0.64  | 0.84 |      | 1.96  | 0.27 |      | 2.87  | 0.02  | Up   | Expressed protein                            |
| Pc_TC062583 | 3.08  | 0.05  | Up   | 4.52  | 0    | Up   | 0     | 0.53 |      | 0.63  | 0.96  |      | Expressed protein                            |
| Pc_TC062593 | 3.66  | 0.06  |      | 4.52  | 0.01 | Up   | 2.96  | 0.28 |      | 3.33  | 0.12  |      | Expressed protein                            |
| Pc_TC062596 | 0.28  | 0.38  |      | 0.29  | 0.48 |      | -1.74 | 0.04 | Down | -1.29 | 0.01  | Down | Expressed protein                            |
| Pc_TC062618 | 1.08  | 0.37  |      | 1.06  | 0.43 |      | 0.66  | 0.72 |      | 2.16  | 0.04  | Up   | Expressed protein                            |
| Pc_TC062621 | 2.78  | 0.02  | Up   | 0     | 0.36 |      | 1.41  | 0.49 |      | -1.37 | 0.66  |      | Expressed protein                            |
| Pc_TC062630 | 2.4   | 0.4   |      | 3.96  | 0.05 | Up   | 3.09  | 0.24 |      | 2.21  | 0.47  |      | Expressed protein                            |
| Pc_TC062652 | 0     | 0.64  |      | 0.06  | 1    |      | 4.59  | 0.01 | Up   | 3.15  | 0.05  | Up   | Expressed protein                            |
| Pc_TC062687 | 2.34  | 0.01  | Up   | 0     | 0.07 |      | 0.7   | 0.68 |      | -0.89 | 0.6   |      | Expressed protein                            |
| Pc_TC062688 | 3.04  | 0     | Up   | 0     | 0.27 |      | 1.64  | 0.35 |      | 1.95  | 0.15  |      | proteasome alpha subunit F1                  |
| Pc_TC062691 | 1.4   | 0.61  |      | 3.38  | 0.04 | Up   | 0     | 0.53 |      | 0     | 0.54  |      | Expressed protein                            |
| Pc_TC062695 | 3.32  | ##### | Up   | -3.94 | 0.05 | Down | 2.87  | 0.02 | Up   | 1.15  | 0.26  |      | polyubiquitin 3                              |
| Pc_TC062743 | 0.27  | 0.68  |      | 0.94  | 0.18 |      | -2.41 | 0.05 | Down | -1.31 | 0.1   |      | Expressed protein                            |
| Pc_TC062744 | -0.92 | 1     |      | 0.06  | 1    |      | 2.41  | 0.27 |      | 3.43  | 0.02  | Up   | Expressed protein                            |
| Pc_TC062753 | 2.95  | 0.03  | Up   | 0     | 0.48 |      | 2.92  | 0.09 |      | 2.04  | 0.22  |      | Expressed protein                            |
| Pc_TC062757 | 2.31  | 0     | Up   | 0     | 0.02 |      | 2.37  | 0.06 |      | 1.08  | 0.29  |      | Succinyl-CoA ligase,alpha subunit            |
| Pc_TC062759 | 0     | 1     |      | 4.06  | 0.04 | Up   | 0     | 0.87 |      | 0     | 0.9   |      | Expressed protein                            |
| Pc_TC062761 | 3.03  | 0     | Up   | 0     | 0.15 |      | 1.78  | 0.25 |      | 1.14  | 0.41  |      | Expressed protein                            |
| Pc_TC062776 | 1.08  | 0.77  |      | 1.06  | 0.8  |      | 4.57  | 0.01 | Up   | 2.71  | 0.12  |      | Expressed protein                            |
| Pc_TC062793 | 3.17  | 0.04  | Up   | 0     | 0.67 |      | 2.31  | 0.3  |      | 0.63  | 0.96  |      | Expressed protein                            |
| Pc_TC062801 | 3.08  | 0.05  | Up   | 0     | 0.67 |      | 1.31  | 0.68 |      | -0.37 | 1     |      | Expressed protein                            |
| Pc_TC062814 | -0.01 | 1     |      | -4    | 0    | Down | 0.38  | 0.75 |      | 0.7   | 0.39  |      | Expressed protein                            |
| Pc_TC062830 | 3.94  | 0     | Up   | 1.64  | 0.53 |      | 2.41  | 0.27 |      | 0.21  | 1     |      | Expressed protein                            |
| Pc_TC062838 | -2.17 | 0.03  | Down | -1.87 | 0.09 |      | -2.29 | 0.1  |      | -2.3  | 0.03  | Down | Expressed protein                            |

|             |       |       |      |  |       |      |      |       |           |      |       |       |      |                                                    |
|-------------|-------|-------|------|--|-------|------|------|-------|-----------|------|-------|-------|------|----------------------------------------------------|
| Pc_TC062849 | 1.65  | 0.03  | Up   |  | 0     | 0    |      | 0.77  | 0.54      |      | -0.74 | 0.5   |      | prolyl oligopeptidase family protein               |
| Pc_TC062850 | 4.08  | 0     | Up   |  | 0     | 0.67 |      | 2.59  | 0.22      |      | 1.21  | 0.69  |      | end binding protein 1C                             |
| Pc_TC062896 | 2.05  | 0.02  | Up   |  | 0     | 0.03 |      | 1.69  | 0.21      |      | -0.08 | 1     |      | Expressed protein                                  |
| Pc_TC062906 | 2.74  | 0.05  | Up   |  | 1.06  | 0.69 |      | -1.08 | 0.83      |      | 0.04  | 1     |      | Expressed protein                                  |
| Pc_TC062927 | 0.66  | 0.62  |      |  | 1.87  | 0.09 |      | 0.64  | 0.71      |      | 2.41  | 0.02  | Up   | MuDR family transposase                            |
| Pc_TC062936 | 3.08  | 0.05  | Up   |  | 0     | 0.67 |      | 2.59  | 0.22      |      | 1.43  | 0.58  |      | farnesyltransferase A                              |
| Pc_TC062961 | -0.47 | 0.6   |      |  | 1.85  | 0.02 | Up   | -2.94 | 0.05      | Down | -3.62 | 0     | Down | Expressed protein                                  |
| Pc_TC062967 | 4.06  | ##### | Up   |  | 0     | 0.36 |      | 3.23  | 0.04      | Up   | 1.43  | 0.39  |      | Major facilitator superfamily protein              |
| Pc_TC062977 | -1.11 | 0.16  |      |  | -2.19 | 0.03 | Down | 1.07  | 0.34      |      | -0.3  | 0.74  |      | Expressed protein                                  |
| Pc_TC062978 | 0.61  | 0.68  |      |  | 1.28  | 0.31 |      | 3.67  | 0         | Up   | 3.56  | 0     | Up   | Expressed protein                                  |
| Pc_TC062998 | -0.64 | 0.28  |      |  | 1.25  | 0.04 | Up   | -0.6  | 0.57      |      | -0.22 | 0.76  |      | Expressed protein                                  |
| Pc_TC062999 | 1.05  | 0.03  | Up   |  | -0.19 | 0.77 |      | -1.26 | 0.23      |      | 0.46  | 0.48  |      | Expressed protein                                  |
| Pc_TC063028 | -2.68 | 0.03  | Down |  | -3.7  | 0.01 | Down | 0.66  | 0.61      |      | -3.54 | 0.01  | Down | Expressed protein                                  |
| Pc_TC063035 | -1.69 | 0.21  |      |  | 0.36  | 0.79 |      | -4.58 | 0.03      | Down | -3.46 | 0.03  | Down | Expressed protein                                  |
| Pc_TC063057 | 2.66  | 0.31  |      |  | 1.64  | 0.75 |      | 4.36  | 0.04      | Up   | 2.43  | 0.39  |      | Expressed protein                                  |
| Pc_TC063084 | 3.78  | 0.05  | Up   |  | 0     | 1    |      | 2.96  | 0.28      |      | 3.53  | 0.09  |      | Expressed protein                                  |
| Pc_TC063087 | 3.8   | ##### | Up   |  | 0     | 0.2  |      | 2.9   | 0.05      | Up   | 1.21  | 0.41  |      | regulatory particle non-ATPase 10                  |
| Pc_TC063106 | 0.5   | 0.09  |      |  | 0.52  | 0.16 |      | -2.48 | 0         | Down | -0.75 | 0.12  |      | Expressed protein                                  |
| Pc_TC063111 | 2.08  | 0.3   |      |  | 3.7   | 0.02 | Up   | -0.5  | 1         |      | -0.37 | 1     |      | Expressed protein                                  |
| Pc_TC063134 | 1.08  | 0.27  |      |  | -1.04 | 0.49 |      | 2.93  | 0.02      | Up   | 2.3   | 0.01  | Up   | Expressed protein                                  |
| Pc_TC063156 | 1.95  | 0.1   |      |  | 0.93  | 0.59 |      | 2.05  | 0.19      |      | 2.36  | 0.05  | Up   | Expressed protein                                  |
| Pc_TC063157 | 0.08  | 0.93  |      |  | 1.91  | 0    | Up   | -4.2  | 0         | Down | -3.34 | 0     | Down | ARP protein (REF)                                  |
| Pc_TC063159 | -1.92 | 0.17  |      |  | -0.94 | 0.52 |      | 2.54  | 0.04      | Up   | 1.38  | 0.16  |      | Expressed protein                                  |
| Pc_TC063163 | -0.81 | 0.58  |      |  | 2.51  | 0.01 | Up   | 1.42  | 0.3       |      | 0.78  | 0.51  |      | Putative uncharacterized protein                   |
| Pc_TC063165 | 2.26  | 0.01  | Up   |  | -0.26 | 0.89 |      | 1.38  | 0.3       |      | 1.93  | 0.04  | Up   | Expressed protein                                  |
| Pc_TC063170 | 2.49  | 0.02  | Up   |  | 0     | 0.2  |      | 3.28  | 0.02      | Up   | 0.21  | 1     |      | Myzus persicae-induced lipase 1                    |
| Pc_TC063177 | -1.41 | 0.02  | Down |  | -0.52 | 0.46 |      | -2.61 | 0.02      | Down | -2.89 | 0     | Down | Expressed protein                                  |
| Pc_TC063189 | 2.27  | 0.02  | Up   |  | 0     | 0.09 |      | 1.38  | 0.36      |      | -0.54 | 0.78  |      | Signal recognition particle(SRP54) subunit protein |
| Pc_TC063218 | 0.08  | 1     |      |  | -1.94 | 0.4  |      | 3.75  | 0         | Up   | 2.15  | 0.05  |      | Expressed protein                                  |
| Pc_TC063233 | 1.08  | 0.65  |      |  | 1.06  | 0.69 |      | 4.05  | 0.01      | Up   | 4.73  | ##### | Up   | Expressed protein                                  |
| Pc_TC063253 | 0.96  | 0.01  |      |  | 0.63  | 0.19 |      | -3.52 | 0         | Down | 0.02  | 0.98  |      | Expressed protein                                  |
| Pc_TC063260 | -0.72 | 0.25  |      |  | 0.71  | 0.29 |      | -4.32 | 0         | Down | -3.78 | ##### | Down | putative Ty1-copia subclass                        |
| Pc_TC063300 | 2.13  | 0     | Up   |  | -4.33 | 0.02 | Down | 2.05  | 0.09      |      | -0.07 | 1     |      | tubulin beta-9 chain                               |
| Pc_TC063323 | 1.66  | 0.48  |      |  | 3.58  | 0.02 | Up   | 0.83  | 0.88      |      | -0.37 | 1     |      | Os07g0108200 protein                               |
| Pc_TC063340 | 2.66  | 0.31  |      |  | 3.96  | 0.05 | Up   | 3.31  | 0.19      |      | 1.21  | 0.89  |      | Expressed protein                                  |
| Pc_TC063356 | 0.24  | 0.59  |      |  | -1.22 | 0.04 | Down | 0.48  | 0.61      |      | 0.97  | 0.09  |      | Expressed protein                                  |
| Pc_TC063364 | 0     | ##### |      |  | -4.37 | 0    | Down | -1.75 | 0.18      |      | 0     | ##### |      | Expressed protein                                  |
| Pc_TC063389 | 0.87  | 0.39  |      |  | 0.47  | 0.72 |      | 3.12  | 0.01      | Up   | -0.11 | 0.98  |      | Expressed protein                                  |
| Pc_TC063393 | 4.89  | 0     | Up   |  | 0     | 1    |      | 6.73  | 8.72E-005 | Up   | 1.63  | 0.71  |      | Expressed protein                                  |
| Pc_TC063417 | 1.08  | 0.43  |      |  | 2.57  | 0.02 | Up   | 0     | 0.11      |      | -1.18 | 0.57  |      | Expressed protein                                  |
| Pc_TC063418 | 3.78  | 0.01  | Up   |  | 0     | 0.67 |      | 1.83  | 0.47      |      | 1.63  | 0.49  |      | Endoribonuclease XendoU                            |
| Pc_TC063445 | 4.6   | ##### | Up   |  | 0     | 0.36 |      | 3.28  | 0.03      | Up   | 1.43  | 0.39  |      | Mov34/MPN/PAD-1 family protein                     |
| Pc_TC063468 | 0.1   | 0.86  |      |  | 0.49  | 0.43 |      | -1.62 | 0.13      |      | -1.46 | 0.04  | Down | Expressed protein                                  |
| Pc_TC063499 | -1.51 | 0.54  |      |  | 0     | 0.2  |      | 2.9   | 0.05      | Up   | 1.04  | 0.5   |      | Expressed protein                                  |
| Pc_TC063505 | 0.13  | 0.79  |      |  | 0.33  | 0.58 |      | -3.91 | 0         | Down | -2.16 | 0     | Down | Expressed protein                                  |
| Pc_TC063527 | -0.54 | 0.65  |      |  | -3.26 | 0.05 | Down | -1.65 | 0.29      |      | -0.89 | 0.46  |      | Expressed protein                                  |
| Pc_TC063538 | -1.67 | 0.06  |      |  | -2.5  | 0.02 | Down | -0.88 | 0.48      |      | -1.47 | 0.12  |      | Argonate family protein                            |
| Pc_TC063541 | 1.25  | 0.48  |      |  | 2.87  | 0.03 | Up   | 0     | 0.26      |      | 0     | 0.24  |      | Expressed protein                                  |
| Pc_TC063548 | -1.51 | 0.54  |      |  | 2.68  | 0.02 | Up   | -0.27 | 0.98      |      | -0.37 | 0.93  |      | Expressed protein                                  |
| Pc_TC063585 | 2.54  | 0.01  | Up   |  | 0     | 0.11 |      | 1.5   | 0.33      |      | 0.63  | 0.69  |      | Expressed protein                                  |
| Pc_TC063603 | 1.08  | 0.77  |      |  | 0.64  | 0.98 |      | 3.55  | 0.05      |      | 3.43  | 0.02  | Up   | Expressed protein                                  |
| Pc_TC063604 | 0.66  | 0.81  |      |  | 0     | 0.36 |      | 3.57  | 0.02      | Up   | 1.95  | 0.19  |      | Expressed protein                                  |
| Pc_TC063631 | 2.19  | 0.05  |      |  | 2.56  | 0.03 | Up   | -2.08 | 0.43      |      | 0.63  | 0.74  |      | Expressed protein                                  |
| Pc_TC063651 | -0.83 | 0.4   |      |  | 0.47  | 0.63 |      | -2.4  | 0.11      |      | -2.96 | 0.02  | Down | Expressed protein                                  |
| Pc_TC063674 | 3.4   | 0.02  | Up   |  | 4.1   | 0    | Up   | 2.75  | 0.18      |      | 2.63  | 0.14  |      | Expressed protein                                  |
| Pc_TC063703 | 3.6   | 0.01  | Up   |  | 0     | 0.67 |      | -1.5  | 0.85      |      | -0.37 | 1     |      | Expressed protein                                  |
| Pc_TC063708 | -0.92 | 1     |      |  | 1.06  | 0.8  |      | 4.34  | 0.01      | Up   | 3.63  | 0.01  | Up   | Expressed protein                                  |
| Pc_TC063727 | 2.6   | 0.04  | Up   |  | 0     | 0.36 |      | 2.31  | 0.18      |      | 0.63  | 0.82  |      | Transducin/WD40 repeat-like superfamily protein    |
| Pc_TC063764 | 2.25  | 0.24  |      |  | 0     | 0.67 |      | 5.79  | 0         | Up   | 2.43  | 0.19  |      | Expressed protein                                  |
| Pc_TC063791 | -0.14 | 0.94  |      |  | 0.84  | 0.41 |      | 0     | 0.01      |      | -2.77 | 0.04  | Down | Expressed protein                                  |
| Pc_TC063794 | 0.93  | 0.6   |      |  | 1.91  | 0.18 |      | 3.09  | 0.04      | Up   | 2.11  | 0.11  |      | Expressed protein                                  |
| Pc_TC063809 | 2.4   | 0.19  |      |  | 3.7   | 0.02 | Up   | 0     | 0.53      |      | 1.95  | 0.36  |      | Expressed protein                                  |



|             |       |      |      |       |           |      |  |       |      |      |       |       |      |                                                          |
|-------------|-------|------|------|-------|-----------|------|--|-------|------|------|-------|-------|------|----------------------------------------------------------|
| Pc_TC063824 | 1.77  | 0    | Up   | 0.31  | 0.7       |      |  | 0.21  | 0.87 |      | 0.99  | 0.19  |      | Expressed protein                                        |
| Pc_TC063834 | 3.47  | 0.02 | Up   | 0     | 0.67      |      |  | 2.31  | 0.3  |      | 0.63  | 0.96  |      | Expressed protein                                        |
| Pc_TC063836 | -0.24 | 1    |      | 2.59  | 0.04      | Up   |  | 0     | 0.19 |      | 0     | 0.16  |      | Expressed protein                                        |
| Pc_TC063840 | 0.39  | 0.49 |      | 0.9   | 0.16      |      |  | -3.01 | 0.01 | Down | -0.39 | 0.59  |      | Expressed protein                                        |
| Pc_TC063841 | 0.52  | 0.43 |      | 0.77  | 0.31      |      |  | -6.61 | 0    | Down | -3.02 | 0     | Down | Expressed protein                                        |
| Pc_TC063846 | 0.79  | 0.51 |      | 1.24  | 0.29      |      |  | 3.83  | 0    | Up   | 2.47  | 0.01  | Up   | Expressed protein                                        |
| Pc_TC063880 | 0     | 0.64 |      | 3.31  | 0.04      | Up   |  | 0     | 0.53 |      | -0.37 | 1     |      | Expressed protein                                        |
| Pc_TC063882 | 2.25  | 0.24 |      | 3.52  | 0.03      | Up   |  | 1.5   | 0.6  |      | 1.21  | 0.69  |      | Expressed protein                                        |
| Pc_TC063904 | -1.96 | 0    | Down | 0.42  | 0.53      |      |  | 1.02  | 0.32 |      | 1.21  | 0.07  |      | Uncharacterized protein                                  |
| Pc_TC063906 | 2.04  | 0    | Up   | 0.11  | 0.95      |      |  | 0.48  | 0.72 |      | -0.05 | 0.99  |      | Putative retroelement                                    |
| Pc_TC063918 | 4.83  | 0    | Up   | 0     | 1         |      |  | 3.5   | 0.15 |      | 1.63  | 0.71  |      | Expressed protein                                        |
| Pc_TC063925 | 3.89  | 0    | Up   | 3.06  | 0.08      |      |  | 2.5   | 0.25 |      | 3.15  | 0.05  | Up   | putative unclassified                                    |
| Pc_TC063966 | -0.62 | 0.48 |      | -1.32 | 0.2       |      |  | -0.69 | 0.59 |      | -2.2  | 0.04  | Down | Os08g0389500 protein                                     |
| Pc_TC063971 | 1.08  | 0.77 |      | 1.87  | 0.44      |      |  | 2.5   | 0.25 |      | 4.43  | 0     | Up   | Expressed protein                                        |
| Pc_TC063975 | 2.25  | 0.09 |      | 4.08  | 0         | Up   |  | 2.93  | 0.07 |      | 2.21  | 0.12  |      | Expressed protein                                        |
| Pc_TC064002 | 1.89  | 0.19 |      | 2.92  | 0.03      | Up   |  | 0     | 0.26 |      | 0     | 0.24  |      | Expressed protein                                        |
| Pc_TC064004 | 1.08  | 0.77 |      | 3.52  | 0.03      | Up   |  | 1.09  | 0.77 |      | -0.37 | 1     |      | Expressed protein                                        |
| Pc_TC064047 | 2.08  | 0.54 |      | 2.06  | 0.59      |      |  | 3.96  | 0.08 |      | 3.95  | 0.04  | Up   | Expressed protein                                        |
| Pc_TC064079 | 1.89  | 0.38 |      | 3.38  | 0.04      | Up   |  | 0.09  | 1    |      | 1.21  | 0.69  |      | Expressed protein                                        |
| Pc_TC064124 | 3.66  | 0    | Up   | 0     | 0.36      |      |  | 3.18  | 0.04 | Up   | 0.43  | 0.93  |      | Expressed protein                                        |
| Pc_TC064139 | -0.29 | 0.74 |      | 0.02  | 1         |      |  | -4.37 | 0.01 | Down | -1.51 | 0.12  |      | Expressed protein                                        |
| Pc_TC064145 | 1.01  | 0.03 | Up   | 0.3   | 0.62      |      |  | -0.18 | 0.86 |      | 1.05  | 0.09  |      | Expressed protein                                        |
| Pc_TC064150 | 2.17  | 0.11 |      | 0     | 0.36      |      |  | 3.2   | 0.04 | Up   | 2.53  | 0.06  |      | Expressed protein                                        |
| Pc_TC064153 | 2.16  | 0.03 | Up   | 1.47  | 0.23      |      |  | -1.08 | 0.61 |      | 1.58  | 0.17  |      | Expressed protein                                        |
| Pc_TC064166 | 0.27  | 0.95 |      | 2.38  | 0.04      | Up   |  | 0.02  | 1    |      | 0.82  | 0.6   |      | Expressed protein                                        |
| Pc_TC064209 | 2.11  | 0.02 | Up   | -1.32 | 0.42      |      |  | -0.03 | 1    |      | 1.35  | 0.2   |      | Expressed protein                                        |
| Pc_TC064223 | -0.92 | 0.83 |      | 1.38  | 0.45      |      |  | 1.9   | 0.3  |      | 2.63  | 0.05  | Up   | Expressed protein                                        |
| Pc_TC064248 | 2.66  | 0.12 |      | 2.87  | 0.11      |      |  | 1.09  | 0.77 |      | 3.15  | 0.05  | Up   | Expressed protein                                        |
| Pc_TC064263 | 1.66  | 0.72 |      | 0     | 1         |      |  | 4.36  | 0.04 | Up   | 3.08  | 0.18  |      | Expressed protein                                        |
| Pc_TC064278 | 3.99  | 0    | Up   | 0     | 0.67      |      |  | 2.75  | 0.18 |      | 0.21  | 1     |      | Expressed protein                                        |
| Pc_TC064292 | 4.12  | 0    | Up   | 0     | 0.67      |      |  | 4.36  | 0.01 | Up   | 2.63  | 0.14  |      | fumarase 1                                               |
| Pc_TC064296 | 1.89  | 0.38 |      | 0.06  | 1         |      |  | 4.61  | 0.01 | Up   | 3.53  | 0.02  | Up   | putative unclassified                                    |
| Pc_TC064305 | 0.23  | 0.95 |      | 0.21  | 0.96      |      |  | 2.89  | 0.03 | Up   | 1.88  | 0.09  |      | Expressed protein                                        |
| Pc_TC064328 | 3.94  | 0    | Up   | 0     | 0.36      |      |  | 3.53  | 0.02 | Up   | 2.02  | 0.17  |      | OPC-8:0 CoA ligase1                                      |
| Pc_TC064354 | -1.36 | 0.03 | Down | -1.12 | 0.12      |      |  | 0.8   | 0.43 |      | -0.2  | 0.77  |      | D-alanine--D-alanine ligase family                       |
| Pc_TC064379 | 3.33  | 0.03 | Up   | 2.64  | 0.16      |      |  | 0.5   | 1    |      | 1.43  | 0.58  |      | Expressed protein                                        |
| Pc_TC064384 | 2.4   | 0.01 | Up   | 0     | 0.11      |      |  | 1.9   | 0.2  |      | 0.71  | 0.64  |      | polyubiquitin 3                                          |
| Pc_TC064397 | -0.92 | 1    |      | 3.58  | 0.02      | Up   |  | 0     | 0.53 |      | 0     | 0.54  |      | Expressed protein                                        |
| Pc_TC064401 | 1.66  | 0.28 |      | 0.06  | 1         |      |  | 3.36  | 0.03 | Up   | 2.08  | 0.15  |      | Expressed protein                                        |
| Pc_TC064467 | -1.38 | 0.4  |      | 2.18  | 0.03      | Up   |  | 0     | 0.04 |      | -2.83 | 0.12  |      | Expressed protein                                        |
| Pc_TC064473 | -1.2  | 0.03 | Down | -1.11 | 0.1       |      |  | 0.95  | 0.33 |      | 0.09  | 0.9   |      | Expressed protein                                        |
| Pc_TC064478 | -1.04 | 0.08 |      | -1.6  | 0.03      | Down |  | 1.59  | 0.11 |      | -0.41 | 0.55  |      | Expressed protein                                        |
| Pc_TC064503 | 0.29  | 0.54 |      | 0.59  | 0.31      |      |  | -2.1  | 0.05 | Down | -1.63 | 0.02  | Down | Expressed protein                                        |
| Pc_TC064507 | 1.54  | 0.34 |      | 3.06  | 0.02      | Up   |  | 0.5   | 0.9  |      | -1.37 | 0.66  |      | Glutathione reductase,cytosolic                          |
| Pc_TC064510 | 0.69  | 0.49 |      | 0.22  | 0.9       |      |  | -4.58 | 0.03 | Down | 0     | 0     |      | Expressed protein                                        |
| Pc_TC064540 | 2.7   | 0    | Up   | 0     | 0.03      |      |  | 2.01  | 0.13 |      | 0.68  | 0.58  |      | Expressed protein                                        |
| Pc_TC064559 | 3.25  | 0.03 | Up   | 3.38  | 0.04      | Up   |  | 1.09  | 0.77 |      | 0.63  | 0.96  |      | Expressed protein                                        |
| Pc_TC064606 | 2.33  | 0.02 | Up   | 1.38  | 0.29      |      |  | 1.31  | 0.41 |      | 3.02  | 0     | Up   | Concanavalin A-like lectin protein kinase family protein |
| Pc_TC064615 | 0.08  | 1    |      | 2.93  | 0.05      | Up   |  | 0.92  | 0.76 |      | 0     | 0.35  |      | Putative uncharacterized protein                         |
| Pc_TC064617 | 2.83  | 0.02 | Up   | 0     | 0.36      |      |  | 1.2   | 0.58 |      | -1.37 | 0.66  |      | TCOP-1/cpn60 chaperonin family protein                   |
| Pc_TC064636 | 1.23  | 0.02 | Up   | 0.56  | 0.38      |      |  | 0     | 1    |      | 2.8   | ##### | Up   | Expressed protein                                        |
| Pc_TC064638 | 5.4   | 0    | Up   | 0     | 1         |      |  | 5.06  | 0.01 | Up   | 2.95  | 0.22  |      | ornithine-delta-aminotransferase                         |
| Pc_TC064659 | 1.66  | 0.23 |      | 3.8   | 0         | Up   |  | 2.54  | 0.1  |      | 2.59  | 0.03  | Up   | Uncharacterized protein                                  |
| Pc_TC064660 | -0.47 | 0.43 |      | -4.18 | 6.30E-006 | Down |  | -0.55 | 0.61 |      | 0.18  | 0.8   |      | Uncharacterized protein                                  |
| Pc_TC064687 | 4.03  | 0    | Up   | 0     | 0.67      |      |  | 2.75  | 0.18 |      | 1.21  | 0.69  |      | nucleolar RNA-binding Nop10p family protein              |
| Pc_TC064691 | 2.66  | 0.31 |      | 4.45  | 0.01      | Up   |  | 1.5   | 0.78 |      | 2.8   | 0.26  |      | Expressed protein                                        |
| Pc_TC064697 | 2.82  | 0.04 | Up   | 2.64  | 0.09      |      |  | 1.09  | 0.69 |      | 1.85  | 0.29  |      | Expressed protein                                        |
| Pc_TC064727 | 2.66  | 0.12 |      | 0.06  | 1         |      |  | 4.12  | 0.02 | Up   | 3.58  | 0.02  | Up   | wall associated kinase 4                                 |
| Pc_TC064739 | 3.08  | 0.05 | Up   | 0     | 0.67      |      |  | 1.09  | 0.77 |      | 0.63  | 0.96  |      | Ribosomal protein L10 family protein                     |
| Pc_TC064741 | 1.82  | 0.29 |      | 3     | 0.04      | Up   |  | 1.62  | 0.46 |      | 2.9   | 0.04  | Up   | Expressed protein                                        |
| Pc_TC064742 | 0.46  | 0.77 |      | 2.54  | 0.01      | Up   |  | 0.7   | 0.68 |      | -0.11 | 1     |      | Putative polyprotein                                     |
| Pc_TC064745 | -0.26 | 0.61 |      | -1.44 | 0.03      | Down |  | 0.85  | 0.37 |      | -0.82 | 0.21  |      | Expressed protein                                        |

|             |       |       |      |       |           |      |  |       |      |      |       |       |      |                                                                      |         |
|-------------|-------|-------|------|-------|-----------|------|--|-------|------|------|-------|-------|------|----------------------------------------------------------------------|---------|
| Pc_TC064746 | 1.75  | 0     | Up   | 0.86  | 0.23      |      |  | -0.55 | 0.63 |      | 0.99  | 0.17  |      | SEUSS transcriptional co-regulator                                   |         |
| Pc_TC064758 | 3.25  | 0.03  | Up   | 2.38  | 0.24      |      |  | -0.5  | 1    |      | 0     | 0.54  |      | Expressed protein                                                    |         |
| Pc_TC064768 | 0.56  | 0.82  |      | 1.54  | 0.32      |      |  | 3.59  | 0.01 | Up   | 2.39  | 0.06  |      | Expressed protein                                                    |         |
| Pc_TC064772 | 0.53  | 0.28  |      | 1.21  | 0.03      | Up   |  | -1.43 | 0.17 |      | -0.29 | 0.67  |      | Expressed protein                                                    |         |
| Pc_TC064773 | -0.51 | 0.54  |      | 0.96  | 0.23      |      |  | -2.62 | 0.06 |      | -4.37 | 0     | Down | Expressed protein                                                    |         |
| Pc_TC064783 | -2.24 | 0.04  | Down | -2.26 | 0.07      |      |  | -0.05 | 1    |      | -0.64 | 0.54  |      | Expressed protein                                                    |         |
| Pc_TC064799 | 0     | ##### |      | 0     | 1.74E-005 |      |  | -3.11 | 0.02 | Down | 0     | ##### |      | Expressed protein                                                    |         |
| Pc_TC064808 | 3.17  | 0.04  | Up   | 4.99  | 9.12E-005 | Up   |  | 0     | 0.53 |      | 1.8   | 0.42  |      | Expressed protein                                                    |         |
| Pc_TC064822 | 2.49  | 0     | Up   | 0     | 0         |      |  | 1.97  | 0.09 |      | 0.14  | 0.91  |      | Expressed protein                                                    |         |
| Pc_TC064852 | -0.85 | 0.09  |      | -2.01 | 0         | Down |  | 0.83  | 0.38 |      | -0.11 | 0.86  |      | Expressed protein                                                    |         |
| Pc_TC064870 | 0.69  | 0.24  |      | 1.53  | 0.02      | Up   |  | -0.66 | 0.55 |      | 0.38  | 0.6   |      | Expressed protein                                                    |         |
| Pc_TC064916 | 0.26  | 0.55  |      | -0.3  | 0.59      |      |  | -3.65 | 0    | Down | -0.71 | 0.24  |      | Expressed protein                                                    |         |
| Pc_TC064966 | 0.09  | 0.87  |      | -4.53 | 4.82E-007 | Down |  | 0.56  | 0.58 |      | -1.92 | 0.01  | Down | cytochrome oxidase                                                   |         |
| Pc_TC064969 | -0.34 | 1     |      | 3.06  | 0.02      | Up   |  | 0     | 0.26 |      | -0.05 | 1     |      | OSJNBa0035i04.5 protein                                              |         |
| Pc_TC064970 | 1.66  | 0.36  |      | 3.12  | 0.03      | Up   |  | 0     | 0.36 |      | 0.04  | 1     |      | Expressed protein                                                    |         |
| Pc_TC064980 | 3.17  | 0.04  | Up   | 0     | 0.67      |      |  | 2.75  | 0.18 |      | -0.37 | 1     |      | Expressed protein                                                    |         |
| Pc_TC064997 | 1     | 0.02  | Up   | 1.21  | 0.02      | Up   |  | -0.62 | 0.52 |      | 0.64  | 0.27  |      | Inhibitor of apoptosis                                               | G2-like |
| Pc_TC064998 | 2.6   | 0.04  | Up   | 0     | 0.36      |      |  | 1.96  | 0.27 |      | 0.21  | 1     |      | Expressed protein                                                    |         |
| Pc_TC065028 | 0     | 0.64  |      | 2.87  | 0.11      |      |  | 4.23  | 0.01 | Up   | 2.53  | 0.16  |      | Expressed protein                                                    |         |
| Pc_TC065036 | 3.17  | 0.04  | Up   | 0     | 0.67      |      |  | 1.5   | 0.6  |      | 0     | 0.54  |      | Expressed protein                                                    |         |
| Pc_TC065046 | -0.8  | 0.16  |      | -1.65 | 0.02      | Down |  | 0.04  | 0.97 |      | -1.16 | 0.1   |      | Expressed protein                                                    |         |
| Pc_TC065067 | -0.21 | 0.96  |      | 2.09  | 0.05      | Up   |  | -1.63 | 0.4  |      | -0.66 | 0.69  |      | Expressed protein                                                    |         |
| Pc_TC065077 | 3.25  | 0.03  | Up   | 0     | 0.67      |      |  | 2.5   | 0.25 |      | 2.53  | 0.16  |      | Expressed protein                                                    |         |
| Pc_TC065118 | 0.15  | 0.81  |      | -0.44 | 0.56      |      |  | 1.24  | 0.23 |      | 2.02  | 0     | Up   | Expressed protein                                                    |         |
| Pc_TC065126 | 2     | 0.01  | Up   | 1.94  | 0.03      | Up   |  | 0.65  | 0.63 |      | 1.23  | 0.18  |      | Putative SWI/SNF-related matrix-associated actin-dependent regulator |         |
| Pc_TC065128 | 2.99  | 0.06  |      | 3.38  | 0.04      | Up   |  | 1.5   | 0.6  |      | 0.95  | 0.81  |      | Expressed protein                                                    |         |
| Pc_TC065147 | 3.99  | 0.03  | Up   | 0     | 1         |      |  | 2.09  | 0.56 |      | 1.21  | 0.89  |      | Expressed protein                                                    |         |
| Pc_TC065167 | 1.08  | 0.65  |      | 0     | 0.48      |      |  | 2.17  | 0.26 |      | 3.13  | 0.02  | Up   | Expressed protein                                                    |         |
| Pc_TC065173 | 0.4   | 0.71  |      | 0.98  | 0.33      |      |  | -4.82 | 0.02 | Down | -3.7  | 0.02  | Down | Expressed protein                                                    |         |
| Pc_TC065177 | -0.17 | 0.78  |      | 0.77  | 0.24      |      |  | -2.53 | 0.03 | Down | -1.12 | 0.14  |      | Expressed protein                                                    |         |
| Pc_TC065192 | -1.07 | 0.22  |      | -2.33 | 0.04      | Down |  | -0.72 | 0.57 |      | -0.86 | 0.37  |      | Expressed protein                                                    |         |
| Pc_TC065198 | 3.25  | 0.03  | Up   | 0     | 0.67      |      |  | 1.96  | 0.42 |      | 2.21  | 0.26  |      | Expressed protein                                                    |         |
| Pc_TC065212 | 2.08  | 0.54  |      | 2.38  | 0.46      |      |  | 3.67  | 0.12 |      | 3.95  | 0.04  | Up   | Putative uncharacterized protein                                     |         |
| Pc_TC065230 | 1.66  | 0.36  |      | 0.47  | 0.98      |      |  | 3.31  | 0.05 | Up   | 3.08  | 0.02  | Up   | Ssu72-like family protein                                            |         |
| Pc_TC065240 | 3.17  | 0.04  | Up   | 0     | 0.67      |      |  | 2.09  | 0.38 |      | -0.37 | 1     |      | Expressed protein                                                    |         |
| Pc_TC065252 | 2.75  | ##### | Up   | 2.77  | 0         | Up   |  | -2.71 | 0.06 |      | -1.78 | 0.09  |      | Uncharacterized protein                                              |         |
| Pc_TC065253 | -0.66 | 0.53  |      | 0.06  | 1         |      |  | -5.14 | 0.01 | Down | -2.7  | 0.04  | Down | Expressed protein                                                    |         |
| Pc_TC065254 | 0.8   | 0.07  |      | 1.23  | 0.02      | Up   |  | -3.46 | 0    | Down | -3.15 | ##### | Down | Protein with RNI-like/FBD-like domains                               |         |
| Pc_TC065255 | -0.27 | 0.63  |      | 0.82  | 0.17      |      |  | -4.51 | 0    | Down | -2.87 | 0     | Down | Protein with RNI-like/FBD-like domains                               |         |
| Pc_TC065261 | 4.08  | ##### | Up   | 0     | 0.36      |      |  | 2.36  | 0.16 |      | 1.53  | 0.35  |      | eukaryotic translation initiation factor 2 beta subunit              |         |
| Pc_TC065266 | -0.95 | 0.13  |      | -1.5  | 0.05      |      |  | 2.62  | 0.01 | Up   | 1.55  | 0.02  | Up   | Uncharacterized protein (Fragment)                                   |         |
| Pc_TC065268 | 1.4   | 0.4   |      | 2.06  | 0.18      |      |  | 2.2   | 0.2  |      | 3.33  | 0.01  | Up   | Expressed protein                                                    |         |
| Pc_TC065297 | 0.66  | 0.97  |      | 0.06  | 1         |      |  | 3.63  | 0.05 | Up   | 1.21  | 0.69  |      | TPA: hypothetical protein ZEAMMB73 106697 [Zea mays]                 |         |
| Pc_TC065298 | 0.4   | 0.57  |      | 1.42  | 0.05      | Up   |  | -0.43 | 0.72 |      | -0.09 | 0.93  |      | Expressed protein                                                    |         |
| Pc_TC065314 | 0.38  | 0.64  |      | 2.22  | 0         | Up   |  | -0.88 | 0.5  |      | -1.85 | 0.07  |      | Ribosomal protein L30/L7 family protein                              |         |
| Pc_TC065315 | 0.08  | 1     |      | -0.94 | 1         |      |  | 3.67  | 0.04 | Up   | 1.43  | 0.58  |      | Expressed protein                                                    |         |
| Pc_TC065333 | 0.08  | 1     |      | 2.38  | 0.46      |      |  | 2.83  | 0.32 |      | 4.02  | 0.03  | Up   | unknown protein                                                      |         |
| Pc_TC065334 | 2.89  | 0.08  |      | 4.1   | 0         | Up   |  | 0     | 0.53 |      | -0.37 | 1     |      | Uncharacterized protein                                              |         |
| Pc_TC065346 | 0     | 0.01  |      | 0     | 0.02      |      |  | -0.69 | 0.68 |      | -3.37 | 0.04  | Down | Expressed protein                                                    |         |
| Pc_TC065364 | -0.45 | 0.49  |      | 0.49  | 0.49      |      |  | -2.99 | 0.02 | Down | -3.03 | 0     | Down | Expressed protein                                                    |         |
| Pc_TC065378 | 1.89  | 0.38  |      | 1.06  | 0.8       |      |  | 5.61  | 0    | Up   | 4.08  | 0     | Up   | Expressed protein                                                    |         |
| Pc_TC065380 | 0     | 1     |      | 0     | 1         |      |  | 4.63  | 0.02 | Up   | 2.8   | 0.26  |      | Expressed protein                                                    |         |
| Pc_TC065381 | -1.92 | 0.59  |      | 0.38  | 0.97      |      |  | 3.23  | 0.04 | Up   | 2.08  | 0.15  |      | Expressed protein                                                    |         |
| Pc_TC065388 | 0.4   | 0.96  |      | 0     | 0.36      |      |  | 3.34  | 0.03 | Up   | 2.08  | 0.15  |      | Expressed protein                                                    |         |
| Pc_TC065389 | 2.08  | 0.54  |      | 4.58  | 0.01      | Up   |  | 0     | 0.87 |      | 2.43  | 0.39  |      | Expressed protein                                                    |         |
| Pc_TC065395 | 3.27  | 0     | Up   | 0     | 0.09      |      |  | 3.41  | 0.01 | Up   | 0.85  | 0.53  |      | Expressed protein                                                    |         |
| Pc_TC065399 | 2.54  | 0.15  |      | 4.15  | 0         | Up   |  | 0     | 0.53 |      | -0.37 | 1     |      | Expressed protein                                                    |         |
| Pc_TC065411 | 0.08  | 1     |      | 2.23  | 0.29      |      |  | 3.2   | 0.09 |      | 3.15  | 0.05  | Up   | Expressed protein                                                    |         |
| Pc_TC065423 | 3.66  | 0.01  | Up   | 0     | 0.67      |      |  | -0.5  | 1    |      | 0     | 0.54  |      | Expressed protein                                                    |         |
| Pc_TC065451 | 3.08  | 0.05  | Up   | 0     | 0.67      |      |  | 1.96  | 0.42 |      | 0     | 0.54  |      | uncharacterized protein                                              |         |
| Pc_TC065473 | -0.71 | 0.46  |      | -2.57 | 0.04      | Down |  | -0.06 | 0.99 |      | -0.2  | 0.87  |      | Expressed protein                                                    |         |
| Pc_TC065506 | 5.4   | 0     | Up   | 0     | 1         |      |  | 0     | 0.87 |      | 0     | 0.9   |      | Expressed protein                                                    |         |

|             |       |       |      |  |       |           |      |  |       |           |      |       |       |      |                                                   |
|-------------|-------|-------|------|--|-------|-----------|------|--|-------|-----------|------|-------|-------|------|---------------------------------------------------|
| Pc_TC065510 | 0.44  | 0.13  |      |  | 0.89  | 0.02      |      |  | -7.54 | 3.37E-012 | Down | -3.75 | ##### | Down | ATP-binding cassette sub-family A member 7        |
| Pc_TC065512 | 3.33  | 0.03  | Up   |  | 0     | 0.67      |      |  | 2.5   | 0.25      |      | 0     | 0.54  |      | Os09g0566500 protein (Fragment)                   |
| Pc_TC065545 | 1.25  | 0.48  |      |  | 2.92  | 0.03      | Up   |  | 0     | 0.26      |      | -1.37 | 0.66  |      | Expressed protein                                 |
| Pc_TC065549 | 3.78  | 0.05  | Up   |  | 0     | 1         |      |  | 1.09  | 0.94      |      | 0     | 0.9   |      | Expressed protein                                 |
| Pc_TC065573 | 0     | 0.64  |      |  | 0     | 0.67      |      |  | 3.63  | 0.05      | Up   | 2.95  | 0.08  |      | Expressed protein                                 |
| Pc_TC065582 | 1.66  | 0.48  |      |  | 0     | 0.67      |      |  | 1.96  | 0.42      |      | 3.53  | 0.02  | Up   | Expressed protein                                 |
| Pc_TC065590 | 0.66  | 0.97  |      |  | 3.45  | 0.03      | Up   |  | -0.5  | 1         |      | 0     | 0.54  |      | Expressed protein                                 |
| Pc_TC065596 | 3.78  | 0.05  | Up   |  | 3.23  | 0.18      |      |  | 2.5   | 0.42      |      | 2.21  | 0.47  |      | Uncharacterized protein                           |
| Pc_TC065598 | 3.33  | 0.03  | Up   |  | 0     | 0.67      |      |  | 1.67  | 0.53      |      | -0.37 | 1     |      | Expressed protein                                 |
| Pc_TC065608 | 1.42  | 0.01  | Up   |  | 0     | 4.64E-009 |      |  | 1.18  | 0.25      |      | -0.27 | 0.71  |      | RNA binding Plectin/S10 domain-containing protein |
| Pc_TC065651 | 0.86  | 0.57  |      |  | -1.16 | 0.63      |      |  | 2.87  | 0.04      | Up   | 1.68  | 0.18  |      | Expressed protein                                 |
| Pc_TC065657 | 3.5   | 0     | Up   |  | 0     | 0.36      |      |  | 2.03  | 0.25      |      | 0.95  | 0.64  |      | Expressed protein                                 |
| Pc_TC065686 | 2.89  | 0.02  | Up   |  | 0     | 0.36      |      |  | 2.26  | 0.19      |      | 0.21  | 1     |      | Expressed protein                                 |
| Pc_TC065719 | 1.4   | 0.61  |      |  | 1.06  | 0.8       |      |  | 1.5   | 0.6       |      | 3.27  | 0.04  | Up   | Expressed protein                                 |
| Pc_TC065726 | 2.08  | 0.54  |      |  | 4.06  | 0.04      | Up   |  | 0     | 0.87      |      | 0     | 0.9   |      | Expressed protein                                 |
| Pc_TC065727 | 1.49  | 0.44  |      |  | 3.28  | 0.02      | Up   |  | 1.38  | 0.56      |      | 0.04  | 1     |      | Ribosomal L5P family protein                      |
| Pc_TC065728 | 2.82  | 0.04  | Up   |  | 3.23  | 0.02      | Up   |  | 1.24  | 0.62      |      | 1.5   | 0.44  |      | Expressed protein                                 |
| Pc_TC065735 | 2.08  | 0.3   |      |  | 3.38  | 0.04      | Up   |  | 1.31  | 0.68      |      | 1.43  | 0.58  |      | Expressed protein                                 |
| Pc_TC065738 | 1.99  | 0.16  |      |  | 1.06  | 0.62      |      |  | 2.59  | 0.12      |      | 2.75  | 0.03  | Up   | Expressed protein                                 |
| Pc_TC065746 | 1.83  | 0.09  |      |  | 2.27  | 0.04      | Up   |  | 1.09  | 0.51      |      | 0.8   | 0.58  |      | Expressed protein                                 |
| Pc_TC065773 | 3.66  | 0.01  | Up   |  | 0     | 0.67      |      |  | 3.2   | 0.09      |      | 1.95  | 0.36  |      | Expressed protein                                 |
| Pc_TC065796 | -3.31 | 0.02  | Down |  | -2.01 | 0.15      |      |  | -1.57 | 0.31      |      | -0.45 | 0.72  |      | Expressed protein                                 |
| Pc_TC065819 | 1.66  | 0.48  |      |  | 3.31  | 0.04      | Up   |  | -1.5  | 0.85      |      | 0     | 0.54  |      | Expressed protein                                 |
| Pc_TC065820 | 2.54  | 0.15  |      |  | 3.96  | 0.01      | Up   |  | 1.96  | 0.42      |      | 2.71  | 0.12  |      | Sialic acid phosphatase synthase                  |
| Pc_TC065821 | 2.72  | 0.03  | Up   |  | 0     | 0.36      |      |  | 1.75  | 0.35      |      | 0.43  | 0.93  |      | Expressed protein                                 |
| Pc_TC065826 | 3.6   | 0.01  | Up   |  | 0     | 0.67      |      |  | 2.59  | 0.22      |      | 0.63  | 0.96  |      | OSIGBa0114M03.4 protein                           |
| Pc_TC065860 | 2.4   | 0.19  |      |  | 2.96  | 0.09      |      |  | 3.59  | 0.05      | Up   | 2.43  | 0.19  |      | Expressed protein                                 |
| Pc_TC065866 | 5.31  | ##### | Up   |  | 0     | 0.2       |      |  | 5.72  | 1.34E-005 | Up   | 0.63  | 0.74  |      | Expressed protein                                 |
| Pc_TC065869 | 0.32  | 0.57  |      |  | 0.59  | 0.36      |      |  | -1.99 | 0.07      |      | -1.63 | 0.03  | Down | Expressed protein                                 |
| Pc_TC065876 | 0.56  | 0.82  |      |  | 1.44  | 0.37      |      |  | 1.7   | 0.32      |      | 2.95  | 0.01  | Up   | Uncharacterized protein                           |
| Pc_TC065881 | 0.66  | 0.97  |      |  | 1.87  | 0.44      |      |  | 2.75  | 0.18      |      | 3.21  | 0.04  | Up   | Expressed protein                                 |
| Pc_TC065917 | 2.08  | 0.2   |      |  | 0.8   | 0.82      |      |  | 3.8   | 0.02      | Up   | 3.63  | 0     | Up   | Expressed protein                                 |
| Pc_TC065940 | 3.08  | 0     | Up   |  | 4.4   | 7.44E-006 | Up   |  | -2.08 | 0.43      |      | 2.47  | 0.04  | Up   | Expressed protein                                 |
| Pc_TC065948 | 0.57  | 0.36  |      |  | 1.14  | 0.1       |      |  | -2.56 | 0.04      | Down | -1.16 | 0.15  |      | Expressed protein                                 |
| Pc_TC065960 | 1.82  | 0.14  |      |  | 3.4   | 0         | Up   |  | -0.5  | 0.89      |      | 1.5   | 0.27  |      | unknown protein                                   |
| Pc_TC065961 | -0.17 | 0.81  |      |  | 0     | 1         |      |  | -1.06 | 0.35      |      | -2.29 | 0.01  | Down | unknown protein                                   |
| Pc_TC065964 | 0.08  | 1     |      |  | 2.43  | 0.05      | Up   |  | -2.08 | 0.43      |      | 0     | 0.11  |      | Expressed protein                                 |
| Pc_TC065978 | 1.4   | 0.23  |      |  | 2.92  | 0.01      | Up   |  | 1.03  | 0.54      |      | -1.37 | 0.47  |      | Ribosomal protein L14p/L23e family protein        |
| Pc_TC065982 | 1.1   | 0.09  |      |  | 2.4   | 0         | Up   |  | -0.6  | 0.62      |      | 0.99  | 0.2   |      | Expressed protein                                 |
| Pc_TC066001 | 0.77  | 0.05  |      |  | 0.78  | 0.12      |      |  | -2.25 | 0.02      | Down | -0.39 | 0.51  |      | Expressed protein                                 |
| Pc_TC066013 | 3.66  | 0.06  |      |  | 3.96  | 0.05      | Up   |  | 3.83  | 0.09      |      | 3.21  | 0.15  |      | Expressed protein                                 |
| Pc_TC066024 | 1.22  | 0.16  |      |  | 1.59  | 0.09      |      |  | 4.22  | 0         | Up   | 3.11  | 0     | Up   | Expressed protein                                 |
| Pc_TC066026 | 2.17  | 0.11  |      |  | 0.06  | 1         |      |  | 4.53  | 0         | Up   | 4.23  | 0     | Up   | Expressed protein                                 |
| Pc_TC066035 | 3.08  | 0.18  |      |  | 1.06  | 0.98      |      |  | 4.36  | 0.04      | Up   | 1.95  | 0.58  |      | Expressed protein                                 |
| Pc_TC066058 | 2.66  | 0.02  | Up   |  | 0     | 0.27      |      |  | 0.77  | 0.74      |      | -0.37 | 0.96  |      | Expressed protein                                 |
| Pc_TC066099 | 2.89  | 0.03  | Up   |  | 0     | 0.48      |      |  | 3.05  | 0.07      |      | 0     | 0.35  |      | Expressed protein                                 |
| Pc_TC066171 | 3.54  | 0.01  | Up   |  | 0     | 0.67      |      |  | 1.83  | 0.47      |      | -0.37 | 1     |      | Expressed protein                                 |
| Pc_TC066241 | -0.2  | 0.68  |      |  | 0.57  | 0.32      |      |  | -1.09 | 0.28      |      | -1.31 | 0.05  | Down | methyltransferases                                |
| Pc_TC066262 | -0.86 | 0.16  |      |  | -1.59 | 0.03      | Down |  | 2.42  | 0.01      | Up   | 1.28  | 0.05  |      | Expressed protein                                 |
| Pc_TC066289 | 0.97  | 0.34  |      |  | 2.61  | 0         | Up   |  | -3.3  | 0.1       |      | -0.48 | 0.75  |      | Expressed protein                                 |
| Pc_TC066318 | 0     | 0     |      |  | -2.94 | 0.02      | Down |  | -3.5  | 0.03      | Down | 0     | 0     |      | Expressed protein                                 |
| Pc_TC066326 | 3.08  | 0.05  | Up   |  | 3.38  | 0.04      | Up   |  | 2.31  | 0.3       |      | 0.63  | 0.96  |      | Expressed protein                                 |
| Pc_TC066330 | -1.25 | 0.03  | Down |  | -1.37 | 0.05      | Down |  | 0.7   | 0.48      |      | -0.13 | 0.85  |      | Uncharacterized protein (Fragment)                |
| Pc_TC066337 | 3.83  | 0     | Up   |  | 0     | 0.67      |      |  | 3.71  | 0.04      | Up   | 1.43  | 0.58  |      | RING-box 1                                        |
| Pc_TC066338 | -1.24 | 0.67  |      |  | 0     | 0.27      |      |  | 3.9   | 0.01      | Up   | 2.76  | 0.02  | Up   | Expressed protein                                 |
| Pc_TC066341 | 0.08  | 1     |      |  | 3.7   | 0.02      | Up   |  | -1.5  | 0.85      |      | 1.21  | 0.69  |      | Expressed protein                                 |
| Pc_TC066360 | 2.58  | 0.01  | Up   |  | 0     | 0.09      |      |  | 1.89  | 0.19      |      | 0.91  | 0.49  |      | Expressed protein                                 |
| Pc_TC066390 | 0.49  | 0.96  |      |  | 0.06  | 1         |      |  | 3.75  | 0.02      | Up   | 2.43  | 0.11  |      | Expressed protein                                 |
| Pc_TC066395 | -1.18 | 0.06  |      |  | -1.72 | 0.02      | Down |  | 0.59  | 0.57      |      | -0.31 | 0.67  |      | Expressed protein                                 |
| Pc_TC066418 | 2.72  | 0.03  | Up   |  | 0     | 0.36      |      |  | 2.41  | 0.15      |      | 0.95  | 0.64  |      | Expressed protein                                 |
| Pc_TC066451 | 3.6   | 0.01  | Up   |  | 0     | 0.67      |      |  | 3.93  | 0.03      | Up   | 3.33  | 0.03  | Up   | Expressed protein                                 |
| Pc_TC066452 | 0.49  | 0.83  |      |  | 2.43  | 0.05      | Up   |  | 0.24  | 0.98      |      | 1.95  | 0.12  |      | Expressed protein                                 |

|             |       |       |      |       |           |      |       |           |      |       |       |      |                                                     |
|-------------|-------|-------|------|-------|-----------|------|-------|-----------|------|-------|-------|------|-----------------------------------------------------|
| Pc_TC066455 | -0.41 | 0.62  |      | 0.61  | 0.46      |      | -3.11 | 0.03      | Down | -2.4  | 0.02  | Down | Expressed protein                                   |
| Pc_TC066457 | 0.66  | 0.97  |      | 2.38  | 0.24      |      | 3.9   | 0.03      | Up   | 2.33  | 0.22  |      | Expressed protein                                   |
| Pc_TC066458 | 2.66  | 0.31  |      | 4.06  | 0.04      | Up   | 0     | 0.87      |      | 0.63  | 1     |      | Expressed protein                                   |
| Pc_TC066459 | 1.82  | 0.29  |      | 2.93  | 0.05      | Up   | 0.5   | 0.95      |      | 2.5   | 0.1   |      | Expressed protein                                   |
| Pc_TC066476 | -0.28 | 0.48  |      | -1.08 | 0.04      | Down | 0.03  | 0.98      |      | 0.16  | 0.77  |      | Expressed protein                                   |
| Pc_TC066491 | 3.66  | 0.06  |      | 3.23  | 0.18      |      | 4.41  | 0.03      | Up   | 3.33  | 0.12  |      | Expressed protein                                   |
| Pc_TC066494 | 1.82  | 0     | Up   | 0     | 1.73E-007 |      | 2.56  | 0.01      | Up   | -0.01 | 1     |      | Expressed protein                                   |
| Pc_TC066499 | 3.83  | 0     | Up   | 0     | 0.67      |      | 2.83  | 0.16      |      | 1.21  | 0.69  |      | Os02g0539900 protein                                |
| Pc_TC066545 | 1.3   | 0.35  |      | 2.43  | 0.05      | Up   | -0.76 | 0.79      |      | 0.36  | 0.91  |      | Expressed protein                                   |
| Pc_TC066553 | 3.08  | 0.05  | Up   | 2.06  | 0.36      |      | 0.83  | 0.88      |      | 2.33  | 0.22  |      | suppressor of npr1-1 constitutive 4                 |
| Pc_TC066601 | 0.26  | 0.58  |      | 0.07  | 0.9       |      | -2.58 | 0.02      | Down | -1.13 | 0.08  |      | Expressed protein                                   |
| Pc_TC066605 | 3.08  | 0.05  | Up   | 0     | 0.67      |      | 4.03  | 0.02      | Up   | 2.08  | 0.3   |      | unknown protein                                     |
| Pc_TC066609 | 3.08  | 0.05  | Up   | 0     | 0.67      |      | 1.5   | 0.6       |      | -0.37 | 1     |      | Expressed protein                                   |
| Pc_TC066642 | 0.76  | 0.71  |      | 1.44  | 0.37      |      | 2.99  | 0.05      | Up   | 2     | 0.13  |      | Expressed protein                                   |
| Pc_TC066645 | 1.66  | 0.12  |      | 2.28  | 0.04      | Up   | -0.67 | 0.76      |      | -0.74 | 0.69  |      | Uncharacterized protein (Fragment)                  |
| Pc_TC066647 | 0.2   | 0.8   |      | -3.48 | 0         | Down | 0.53  | 0.65      |      | -0.19 | 0.84  |      | Expressed protein                                   |
| Pc_TC066652 | 0.08  | 1     |      | 2.87  | 0.03      | Up   | 0     | 0.26      |      | -1.37 | 0.66  |      | Expressed protein                                   |
| Pc_TC066683 | 3.89  | 0     | Up   | 0     | 0.67      |      | 3.93  | 0.03      | Up   | 2.21  | 0.26  |      | Expressed protein                                   |
| Pc_TC066689 | 1.29  | ##### | Up   | 2.15  | 3.27E-008 | Up   | -2.56 | 0         | Down | -1.46 | 0     | Down | Expressed protein                                   |
| Pc_TC066694 | 0.69  | 0.02  |      | 1.41  | 0         | Up   | -3.42 | 0         | Down | -1.6  | 0     | Down | Uncharacterized protein                             |
| Pc_TC066695 | -0.33 | 0.29  |      | -0.65 | 0.11      |      | -2.66 | 0         | Down | -1.39 | 0.01  | Down | Expressed protein                                   |
| Pc_TC066705 | 3.17  | 0.04  | Up   | 0     | 0.67      |      | 1.5   | 0.6       |      | 1.43  | 0.58  |      | lipid transporters                                  |
| Pc_TC066714 | 4.55  | ##### | Up   | 0     | 0.2       |      | 3.97  | 0         | Up   | 2.33  | 0.05  |      | ARP protein (REF)                                   |
| Pc_TC066727 | -2.73 | 0.05  | Down | -0.01 | 1         |      | 0.84  | 0.53      |      | 0.23  | 0.86  |      | Expressed protein                                   |
| Pc_TC066760 | 2.33  | ##### | Up   | 0     | 4.53E-010 |      | 2.06  | 0.04      | Up   | 1.11  | 0.09  |      | Expressed protein                                   |
| Pc_TC066765 | 2.66  | 0.12  |      | 1.64  | 0.53      |      | 3.59  | 0.05      | Up   | 3.15  | 0.05  | Up   | Expressed protein                                   |
| Pc_TC066783 | 0     | 0.64  |      | 0     | 0.67      |      | 3.59  | 0.05      | Up   | 2.33  | 0.22  |      | Expressed protein                                   |
| Pc_TC066803 | 2.78  | 0.02  | Up   | 0     | 0.36      |      | 2.09  | 0.24      |      | 0.43  | 0.93  |      | Expressed protein                                   |
| Pc_TC066804 | 0.57  | 0.38  |      | 1.24  | 0.08      |      | -5.12 | 0         | Down | -0.58 | 0.48  |      | Expressed protein                                   |
| Pc_TC066807 | 3.25  | 0.14  |      | 4.23  | 0.02      | Up   | 1.09  | 0.94      |      | 0     | 0.9   |      | Expressed protein                                   |
| Pc_TC066826 | -0.09 | 0.87  |      | -0.17 | 0.79      |      | -1.84 | 0.08      |      | -1.49 | 0.03  | Down | Expressed protein                                   |
| Pc_TC066832 | 1.34  | 0.37  |      | 3.44  | 0         | Up   | -1.82 | 0.53      |      | 0.89  | 0.63  |      | pescafillo-related                                  |
| Pc_TC066845 | 0     | 0.64  |      | 1.87  | 0.44      |      | 4.61  | 0.01      | Up   | 3.27  | 0.04  | Up   | Expressed protein                                   |
| Pc_TC066862 | 3.08  | 0.05  | Up   | 0     | 0.67      |      | 1.83  | 0.47      |      | 1.8   | 0.42  |      | Expressed protein                                   |
| Pc_TC066864 | 3.78  | 0.05  | Up   | 4.15  | 0.03      | Up   | 2.09  | 0.56      |      | 4.08  | 0.03  | Up   | Expressed protein                                   |
| Pc_TC066867 | 4.6   | 0     | Up   | 0     | 1         |      | 2.83  | 0.32      |      | 2.63  | 0.32  |      | Expressed protein                                   |
| Pc_TC066912 | 0.86  | 0.26  |      | 0.21  | 0.84      |      | -2.63 | 0.07      |      | -2.33 | 0.04  | Down | Expressed protein                                   |
| Pc_TC066928 | 1.78  | 0.02  | Up   | 0     | 0         |      | 1.17  | 0.35      |      | 0.15  | 0.92  |      | Cytochrome c oxidase,subunit Vib family protein     |
| Pc_TC066935 | -0.51 | 1     |      | 0.06  | 1         |      | 4.13  | 0.01      | Up   | 2.9   | 0.04  | Up   | Expressed protein                                   |
| Pc_TC066947 | 2.4   | 0.03  | Up   | 0     | 0.2       |      | 1.83  | 0.26      |      | -0.15 | 1     |      | Expressed protein                                   |
| Pc_TC066951 | 1.3   | 0.53  |      | 2.93  | 0.05      | Up   | 0     | 0.36      |      | 0     | 0.35  |      | Expressed protein                                   |
| Pc_TC066956 | 4.33  | 0.01  | Up   | 0     | 1         |      | 1.09  | 0.94      |      | 3.53  | 0.09  |      | Uncharacterized protein                             |
| Pc_TC066957 | 1.89  | 0.38  |      | 1.64  | 0.53      |      | 1.5   | 0.6       |      | 3.43  | 0.02  | Up   | Expressed protein                                   |
| Pc_TC066963 | 2.4   | 0.04  | Up   | 0.54  | 0.85      |      | 0     | 0.19      |      | 0.47  | 0.87  |      | acyl-CoA oxidase 3                                  |
| Pc_TC066979 | 0.74  | 0.07  |      | 0.73  | 0.16      |      | -4.56 | 6.05E-005 | Down | -4.07 | ##### | Down | Expressed protein                                   |
| Pc_TC066981 | 3.25  | 0.03  | Up   | 0     | 0.67      |      | 1.5   | 0.6       |      | -1.37 | 0.88  |      | Expressed protein                                   |
| Pc_TC067015 | 3.78  | 0.05  | Up   | 0     | 1         |      | 4.46  | 0.03      | Up   | 0.63  | 1     |      | Putative uncharacterized protein P0582D05.125       |
| Pc_TC067018 | 0.83  | 0.13  |      | 0.87  | 0.18      |      | -4.15 | 0         | Down | -1.68 | 0.03  | Down | Expressed protein                                   |
| Pc_TC067022 | 1.19  | 0.14  |      | 2.12  | 0.01      | Up   | -1.38 | 0.35      |      | 0.47  | 0.65  |      | Expressed protein                                   |
| Pc_TC067028 | -0.34 | 1     |      | 1.06  | 0.62      |      | 3.09  | 0.05      | Up   | 2.08  | 0.15  |      | Expressed protein                                   |
| Pc_TC067046 | 1.66  | 0.48  |      | 0.06  | 1         |      | 4.03  | 0.02      | Up   | 2.71  | 0.12  |      | NB-ARC domain-containing disease resistance protein |
| Pc_TC067070 | 0.9   | 0.01  |      | 1.8   | 6.50E-005 | Up   | -5.37 | 1.88E-006 | Down | -3.57 | ##### | Down | Uncharacterized protein                             |
| Pc_TC067078 | -0.92 | 1     |      | 0.06  | 1         |      | 3.55  | 0.05      |      | 3.15  | 0.05  | Up   | Expressed protein                                   |
| Pc_TC067084 | 3.17  | 0.04  | Up   | 0     | 0.67      |      | 2.67  | 0.2       |      | -0.37 | 1     |      | Expressed protein                                   |
| Pc_TC067107 | 2.25  | 0.24  |      | 0.06  | 1         |      | 7.91  | 7.07E-008 | Up   | 0.95  | 0.81  |      | Expressed protein                                   |
| Pc_TC067116 | 0.33  | 0.62  |      | 1.67  | 0.02      | Up   | -1.67 | 0.17      |      | -1.05 | 0.21  |      | Expressed protein                                   |
| Pc_TC067119 | 2.95  | 0.03  | Up   | 2.38  | 0.15      |      | 2.44  | 0.19      |      | 2.9   | 0.04  | Up   | Expressed protein                                   |
| Pc_TC067134 | 0.44  | 0.38  |      | 0.61  | 0.31      |      | -2.38 | 0.03      | Down | -1.51 | 0.03  | Down | Expressed protein                                   |
| Pc_TC067228 | 1.54  | 0.34  |      | 3.38  | 0.01      | Up   | -1.5  | 0.66      |      | -2.37 | 0.46  |      | Putative uncharacterized protein                    |
| Pc_TC067234 | 4.17  | 0     | Up   | 0     | 0.67      |      | 2.75  | 0.18      |      | 0.21  | 1     |      | starch branching enzyme 2.1                         |
| Pc_TC067236 | 3.89  | 0.04  | Up   | 1.06  | 0.98      |      | -0.5  | 1         |      | 2.21  | 0.47  |      | Expressed protein                                   |
| Pc_TC067238 | 3.38  | 0     | Up   | 0     | 0.11      |      | 0.59  | 0.77      |      | -0.37 | 0.89  |      | Expressed protein                                   |

|             |       |       |      |  |       |      |      |  |       |      |      |       |      |      |                                                         |
|-------------|-------|-------|------|--|-------|------|------|--|-------|------|------|-------|------|------|---------------------------------------------------------|
| Pc_TC067247 | 0.66  | 0.97  |      |  | 3.76  | 0.01 | Up   |  | -0.5  | 1    |      | -0.37 | 1    |      | Expressed protein                                       |
| Pc_TC067258 | 1.66  | 0.48  |      |  | 3.38  | 0.04 | Up   |  | 0     | 0.53 |      | 1.21  | 0.69 |      | Expressed protein                                       |
| Pc_TC067285 | -1.36 | 0.27  |      |  | -0.1  | 0.98 |      |  | 0     | 0.01 |      | -4.62 | 0.01 | Down | Uncharacterized protein                                 |
| Pc_TC067292 | 4.25  | 0.01  | Up   |  | 0     | 1    |      |  | 1.09  | 0.94 |      | 0     | 0.9  |      | Expressed protein                                       |
| Pc_TC067297 | 1.66  | 0.48  |      |  | -0.94 | 1    |      |  | 2.83  | 0.16 |      | 3.38  | 0.03 | Up   | Expressed protein                                       |
| Pc_TC067304 | 0.66  | 0.97  |      |  | 0.06  | 1    |      |  | 4.12  | 0.02 | Up   | 3.02  | 0.07 |      | Expressed protein                                       |
| Pc_TC067306 | 3.78  | 0.05  | Up   |  | 3.23  | 0.18 |      |  | 3.59  | 0.13 |      | 3.53  | 0.09 |      | Expressed protein                                       |
| Pc_TC067334 | 2.82  | 0.01  | Up   |  | 0     | 0.2  |      |  | 2.67  | 0.07 |      | 0.95  | 0.55 |      | Glycosyl hydrolase family 38 protein                    |
| Pc_TC067335 | 4.22  | ##### | Up   |  | 0     | 0.01 |      |  | 2.74  | 0.02 | Up   | 0.7   | 0.5  |      | UDP-Glycosyltransferase superfamily protein             |
| Pc_TC067354 | -0.42 | 0.65  |      |  | -1.86 | 0.1  |      |  | -4    | 0.02 | Down | -3.14 | 0.01 | Down | Expressed protein                                       |
| Pc_TC067359 | 1.08  | 0.97  |      |  | 2.38  | 0.46 |      |  | 3.41  | 0.17 |      | 4.02  | 0.03 | Up   | Expressed protein                                       |
| Pc_TC067366 | 4.29  | 0     | Up   |  | 0     | 0.67 |      |  | 4.36  | 0.01 | Up   | 2.43  | 0.19 |      | Expressed protein                                       |
| Pc_TC067380 | 0.56  | 0.82  |      |  | 1.32  | 0.43 |      |  | 2.74  | 0.07 |      | 2.8   | 0.02 | Up   | Expressed protein                                       |
| Pc_TC067421 | 3.08  | 0.01  | Up   |  | 2.96  | 0.02 | Up   |  | -1.5  | 0.66 |      | 1.43  | 0.39 |      | Expressed protein                                       |
| Pc_TC067448 | 3.08  | 0.05  | Up   |  | 0     | 0.67 |      |  | 2.41  | 0.27 |      | 0.63  | 0.96 |      | Expressed protein                                       |
| Pc_TC067460 | 0.89  | 0.52  |      |  | 0.38  | 0.87 |      |  | 3.63  | 0.01 | Up   | 2.27  | 0.04 | Up   | Expressed protein                                       |
| Pc_TC067472 | 0.3   | 0.54  |      |  | 0.36  | 0.54 |      |  | -1.73 | 0.1  |      | -1.78 | 0.01 | Down | Expressed protein                                       |
| Pc_TC067481 | -0.24 | 0.72  |      |  | 0.33  | 0.65 |      |  | -2.74 | 0.03 | Down | -0.36 | 0.65 |      | uncharacterized protein                                 |
| Pc_TC067499 | 3.66  | 0.01  | Up   |  | 0     | 0.67 |      |  | 2.31  | 0.3  |      | 0.63  | 0.96 |      | Expressed protein                                       |
| Pc_TC067533 | -0.67 | 0.25  |      |  | -0.98 | 0.16 |      |  | -0.91 | 0.39 |      | -1.52 | 0.04 | Down | Expressed protein                                       |
| Pc_TC067540 | 2.66  | 0.03  | Up   |  | 2.7   | 0.05 | Up   |  | 2.15  | 0.22 |      | 2.53  | 0.06 |      | Expressed protein                                       |
| Pc_TC067589 | -1.73 | 0.16  |      |  | -0.43 | 0.75 |      |  | -1.57 | 0.31 |      | -2.77 | 0.04 | Down | cysteine-rich RLK (RECEPTOR-like protein kinase) 8      |
| Pc_TC067590 | 4.47  | 0.01  | Up   |  | 0     | 1    |      |  | 3.67  | 0.12 |      | 2.43  | 0.39 |      | Expressed protein                                       |
| Pc_TC067626 | 1.95  | 0.03  | Up   |  | 0     | 0.04 |      |  | 1.9   | 0.16 |      | 0.04  | 1    |      | Expressed protein                                       |
| Pc_TC067632 | 1.08  | 0.97  |      |  | 3.96  | 0.05 | Up   |  | 0.5   | 1    |      | 0.63  | 1    |      | Expressed protein                                       |
| Pc_TC067637 | 2.78  | 0.02  | Up   |  | 0     | 0.36 |      |  | 1.5   | 0.45 |      | -0.37 | 0.99 |      | RNA-binding (RRM/RBD/RNP motifs) family protein         |
| Pc_TC067668 | 0.3   | 0.44  |      |  | 0.64  | 0.19 |      |  | -1.61 | 0.09 |      | -1.19 | 0.04 | Down | DENN (AEX-3) domain-containing protein                  |
| Pc_TC067670 | 2.6   | 0.04  | Up   |  | -0.36 | 1    |      |  | 2.79  | 0.08 |      | 3.38  | 0    | Up   | glutathione reductase                                   |
| Pc_TC067673 | 3.78  | 0.05  | Up   |  | 2.06  | 0.59 |      |  | 1.83  | 0.66 |      | 3.33  | 0.12 |      | Expressed protein                                       |
| Pc_TC067684 | 2.3   | 0.13  |      |  | 1.28  | 0.58 |      |  | -0.08 | 1    |      | 3.33  | 0.01 | Up   | Uncharacterized protein                                 |
| Pc_TC067692 | 1.66  | 0.48  |      |  | 3.52  | 0.03 | Up   |  | -0.5  | 1    |      | 1.63  | 0.49 |      | Expressed protein                                       |
| Pc_TC067719 | 2.54  | 0.05  | Up   |  | 1.76  | 0.29 |      |  | 0     | 0.26 |      | 0.21  | 1    |      | Expressed protein                                       |
| Pc_TC067722 | 3.4   | 0.02  | Up   |  | 1.64  | 0.53 |      |  | 2.41  | 0.27 |      | 3.21  | 0.04 | Up   | Expressed protein                                       |
| Pc_TC067730 | 4.89  | 0     | Up   |  | 0     | 1    |      |  | 4.31  | 0.04 | Up   | 2.63  | 0.32 |      | transducin family protein / WD-40 repeat family protein |
| Pc_TC067745 | -0.18 | 0.85  |      |  | 0.71  | 0.4  |      |  | 0     | 0    |      | -3.18 | 0.01 | Down | Expressed protein                                       |
| Pc_TC067750 | 0.25  | 0.67  |      |  | 0.67  | 0.31 |      |  | -2.56 | 0.03 | Down | -0.66 | 0.37 |      | putative Ty1-copia subclass                             |
| Pc_TC067818 | 1.08  | 0.97  |      |  | 3.96  | 0.05 | Up   |  | 0     | 0.87 |      | 0     | 0.9  |      | Expressed protein                                       |
| Pc_TC067822 | 4.21  | 0     | Up   |  | 0     | 0.67 |      |  | 3.31  | 0.08 |      | 3.08  | 0.06 |      | heat shock protein 60                                   |
| Pc_TC067825 | 4.29  | 0     | Up   |  | 0     | 0.67 |      |  | 2.67  | 0.2  |      | 2.21  | 0.26 |      | Putative uncharacterized protein OJ1124 D06.20          |
| Pc_TC067831 | -0.51 | 0.89  |      |  | 0     | 0.2  |      |  | 3.47  | 0.01 | Up   | 0.85  | 0.61 |      | Expressed protein                                       |
| Pc_TC067835 | 1.79  | 0.06  |      |  | 2.06  | 0.05 | Up   |  | 2.6   | 0.05 | Up   | 1.87  | 0.07 |      | Expressed protein                                       |
| Pc_TC067850 | 3.89  | 0.04  | Up   |  | 2.06  | 0.59 |      |  | 3.5   | 0.15 |      | 1.63  | 0.71 |      | Expressed protein                                       |
| Pc_TC067880 | -1.04 | 0.04  | Down |  | -0.34 | 0.56 |      |  | -0.21 | 0.83 |      | -0.58 | 0.36 |      | Expressed protein                                       |
| Pc_TC067903 | -1.29 | 0.19  |      |  | -2.9  | 0.03 | Down |  | -1.45 | 0.3  |      | -2.74 | 0.02 | Down | Expressed protein                                       |
| Pc_TC067926 | 2.4   | 0.19  |      |  | 3.31  | 0.04 | Up   |  | 0     | 0.53 |      | 0     | 0.54 |      | Expressed protein                                       |
| Pc_TC067932 | -1.01 | 0.28  |      |  | -4.03 | 0    | Down |  | 0.76  | 0.54 |      | -1.46 | 0.16 |      | Expressed protein                                       |
| Pc_TC067945 | 3.25  | 0.03  | Up   |  | 0     | 0.67 |      |  | 3.26  | 0.09 |      | 1.43  | 0.58 |      | Expressed protein                                       |
| Pc_TC067955 | 0.31  | 0.69  |      |  | -0.35 | 0.72 |      |  | -2.82 | 0.04 | Down | -1.06 | 0.26 |      | Expressed protein                                       |
| Pc_TC067965 | 5.93  | ##### | Up   |  | 0     | 0.48 |      |  | 3.09  | 0.07 |      | -0.96 | 0.86 |      | Expressed protein                                       |
| Pc_TC067971 | 4.9   | ##### | Up   |  | 0     | 0.36 |      |  | 3.96  | 0.01 | Up   | 2.33  | 0.09 |      | Expressed protein                                       |
| Pc_TC067974 | 2.25  | 0.03  | Up   |  | 0     | 0.11 |      |  | 2.57  | 0.07 |      | 0.95  | 0.49 |      | Uncharacterized protein                                 |
| Pc_TC067975 | 3.66  | 0.01  | Up   |  | 0     | 0.67 |      |  | 3.09  | 0.11 |      | 1.21  | 0.69 |      | Expressed protein                                       |
| Pc_TC068000 | 2.08  | 0.2   |      |  | 0.47  | 0.98 |      |  | 4.49  | 0    | Up   | 3.47  | 0.01 | Up   | Expressed protein                                       |
| Pc_TC068020 | -0.92 | 1     |      |  | 3.38  | 0.04 | Up   |  | 0     | 0.53 |      | -0.37 | 1    |      | Expressed protein                                       |
| Pc_TC068029 | 3.08  | 0.05  | Up   |  | 0     | 0.67 |      |  | 2.5   | 0.25 |      | 2.8   | 0.1  |      | Expressed protein                                       |
| Pc_TC068030 | 0.53  | 0.7   |      |  | -1.08 | 0.54 |      |  | 2.07  | 0.13 |      | 2.38  | 0.02 | Up   | Cobalamin-independent synthase family protein           |
| Pc_TC068043 | 0.66  | 0.97  |      |  | 2.64  | 0.16 |      |  | 3.83  | 0.03 | Up   | 2.8   | 0.1  |      | cysteine-rich RLK (RECEPTOR-like protein kinase) 8      |
| Pc_TC068056 | -0.92 | 1     |      |  | 0.64  | 0.98 |      |  | 2.67  | 0.2  |      | 3.15  | 0.05 | Up   | Expressed protein                                       |
| Pc_TC068075 | 1.08  | 0.57  |      |  | -0.36 | 1    |      |  | 3.5   | 0.02 | Up   | 2.75  | 0.03 | Up   | Expressed protein                                       |
| Pc_TC068079 | -0.92 | 0.83  |      |  | 0.87  | 0.72 |      |  | 3.73  | 0.01 | Up   | 2.53  | 0.06 |      | Expressed protein                                       |
| Pc_TC068113 | 1.75  | 0.07  |      |  | 2.87  | 0    | Up   |  | -1.96 | 0.32 |      | -0.66 | 0.69 |      | Expressed protein                                       |
| Pc_TC068142 | 3.08  | 0.05  | Up   |  | 0     | 0.67 |      |  | 0.5   | 1    |      | -0.37 | 1    |      | Expressed protein                                       |

|             |       |       |      |       |           |      |       |           |      |       |       |      |                                                         |     |
|-------------|-------|-------|------|-------|-----------|------|-------|-----------|------|-------|-------|------|---------------------------------------------------------|-----|
| Pc_TC068144 | 3.66  | 0.01  | Up   | 0     | 0.67      |      | 3.31  | 0.08      |      | 1.8   | 0.42  |      | Expressed protein                                       |     |
| Pc_TC068145 | 0.39  | 0.61  |      | 0.03  | 1         |      | -3.44 | 0.02      | Down | -2.73 | 0.01  | Down | Expressed protein                                       |     |
| Pc_TC068147 | 3.4   | 0.02  | Up   | 0     | 0.67      |      | 2.09  | 0.38      |      | -0.37 | 1     |      | tubulin beta chain 4                                    |     |
| Pc_TC068160 | 3.4   | 0.1   |      | 4.38  | 0.02      | Up   | 1.5   | 0.78      |      | 1.21  | 0.89  |      | Expressed protein                                       |     |
| Pc_TC068167 | 3.54  | 0.01  | Up   | 0     | 0.67      |      | 2.2   | 0.34      |      | -0.37 | 1     |      | Expressed protein                                       |     |
| Pc_TC068192 | 0.08  | 1     |      | 2.87  | 0.02      | Up   | -1.23 | 0.68      |      | 1     | 0.56  |      | Expressed protein                                       |     |
| Pc_TC068210 | 0.76  | 0.55  |      | 1.06  | 0.41      |      | 2.41  | 0.07      |      | 2.26  | 0.03  | Up   | Expressed protein                                       |     |
| Pc_TC068216 | 3.19  | 0.01  | Up   | 0     | 0.48      |      | 1.24  | 0.62      |      | 1.04  | 0.66  |      | Expressed protein                                       |     |
| Pc_TC068231 | 3.4   | 0.02  | Up   | 0     | 0.67      |      | 2.5   | 0.25      |      | 1.63  | 0.49  |      | Uncharacterized protein                                 |     |
| Pc_TC068262 | 0.49  | 0.29  |      | 0.13  | 0.82      |      | -2.24 | 0.03      | Down | -1.68 | 0.01  | Down | Expressed protein                                       |     |
| Pc_TC068269 | 0.49  | 0.67  |      | 1.54  | 0.13      |      | -2.82 | 0.14      |      | -4.28 | 0.02  | Down | uncharacterized protein                                 |     |
| Pc_TC068284 | 3.4   | 0.02  | Up   | 0     | 0.67      |      | 0.5   | 1         |      | 1.63  | 0.49  |      | Expressed protein                                       |     |
| Pc_TC068286 | 1.66  | 0.48  |      | 2.06  | 0.36      |      | 2.75  | 0.18      |      | 3.15  | 0.05  | Up   | Expressed protein                                       |     |
| Pc_TC068291 | 2.46  | 0.04  | Up   | 0     | 0.27      |      | 1.64  | 0.35      |      | -1.11 | 0.68  |      | Expressed protein                                       |     |
| Pc_TC068293 | -0.05 | 0.97  |      | -0.99 | 0.27      |      | -0.3  | 0.81      |      | -2.03 | 0.03  | Down | Expressed protein                                       |     |
| Pc_TC068294 | 1.49  | 0.02  | Up   | 1.69  | 0.02      | Up   | 1.19  | 0.28      |      | 1.63  | 0.03  | Up   | Expressed protein                                       |     |
| Pc_TC068295 | -1.36 | 0.03  | Down | -1.58 | 0.04      | Down | -0.81 | 0.45      |      | -0.02 | 0.98  |      | Expressed protein                                       |     |
| Pc_TC068314 | 2.25  | 0.09  |      | 2.96  | 0.02      | Up   | -0.91 | 0.82      |      | 1.21  | 0.5   |      | Expressed protein                                       |     |
| Pc_TC068332 | 0.08  | 1     |      | 2.92  | 0.03      | Up   | 0     | 0.26      |      | -0.37 | 0.99  |      | Putative sugar transporter                              |     |
| Pc_TC068334 | 0.08  | 1     |      | 2.38  | 0.24      |      | 1.67  | 0.53      |      | 3.8   | 0.01  | Up   | Expressed protein                                       |     |
| Pc_TC068355 | 3.99  | 0     | Up   | 0     | 0.67      |      | 2.5   | 0.25      |      | 0.63  | 0.96  |      | Expressed protein                                       |     |
| Pc_TC068356 | 0.66  | 0.97  |      | 0.06  | 1         |      | 3.63  | 0.05      | Up   | 3.38  | 0.03  | Up   | Expressed protein                                       |     |
| Pc_TC068371 | 2.14  | 0.02  | Up   | 0     | 0.05      |      | 1.29  | 0.37      |      | 0.41  | 0.79  |      | Expressed protein                                       |     |
| Pc_TC068374 | -3.24 | 0.01  | Down | -2.85 | 0.03      | Down | -0.65 | 0.64      |      | -2.7  | 0.03  | Down | Histone superfamily protein                             |     |
| Pc_TC068379 | 3.4   | 0.02  | Up   | 0     | 0.67      |      | 2.2   | 0.34      |      | -1.37 | 0.88  |      | Expressed protein                                       |     |
| Pc_TC068389 | 0.89  | 0.68  |      | 2.7   | 0.05      | Up   | 1.83  | 0.32      |      | 1.21  | 0.5   |      | Expressed protein                                       |     |
| Pc_TC068390 | 0.32  | 0.65  |      | 1.36  | 0.06      |      | -3.56 | 0.01      | Down | -1.69 | 0.06  |      | Expressed protein                                       |     |
| Pc_TC068410 | 2     | 0.05  | Up   | 0     | 0.09      |      | 2.54  | 0.06      |      | 0.78  | 0.57  |      | Expressed protein                                       |     |
| Pc_TC068415 | 1.08  | 0.57  |      | 2.76  | 0.04      | Up   | 1.2   | 0.58      |      | 1.43  | 0.39  |      | Expressed protein                                       |     |
| Pc_TC068421 | 1.27  | 0.18  |      | 1.3   | 0.23      |      | 2.97  | 0.02      | Up   | 2.85  | 0     | Up   | Expressed protein                                       |     |
| Pc_TC068457 | 3.47  | 0.02  | Up   | 3.15  | 0.06      |      | 3.5   | 0.06      |      | 2.43  | 0.19  |      | Expressed protein                                       |     |
| Pc_TC068473 | 1.08  | 0.65  |      | 3.33  | 0.02      | Up   | 0.5   | 0.95      |      | 0     | 0.35  |      | Putative uncharacterized protein                        |     |
| Pc_TC068489 | 0.16  | 0.82  |      | 0.77  | 0.29      |      | -1.71 | 0.15      |      | -2.91 | 0     | Down | Expressed protein                                       |     |
| Pc_TC068493 | 2.4   | 0.03  | Up   | 0     | 0.2       |      | 1.78  | 0.27      |      | 1.04  | 0.5   |      | Expressed protein                                       |     |
| Pc_TC068502 | -0.51 | 0.89  |      | 0.06  | 1         |      | 3.56  | 0.01      | Up   | 2.33  | 0.05  |      | Expressed protein                                       |     |
| Pc_TC068503 | 3.4   | 0.02  | Up   | 2.76  | 0.13      |      | 1.09  | 0.77      |      | 2.8   | 0.1   |      | Expressed protein                                       |     |
| Pc_TC068530 | 0.27  | 0.95  |      | 2.34  | 0.05      | Up   | 1.45  | 0.37      |      | 2.07  | 0.08  |      | Expressed protein                                       |     |
| Pc_TC068538 | 2.08  | 0.3   |      | -0.94 | 1         |      | 2.96  | 0.14      |      | 4.51  | 0     | Up   | Expressed protein                                       |     |
| Pc_TC068558 | 0.49  | 0.96  |      | 1.93  | 0.29      |      | 1.09  | 0.69      |      | 2.85  | 0.05  | Up   | Expressed protein                                       |     |
| Pc_TC068559 | 1.08  | 0.97  |      | 0     | 1         |      | 4.46  | 0.03      | Up   | 3.21  | 0.15  |      | Expressed protein                                       |     |
| Pc_TC068580 | 3.4   | 0.02  | Up   | 0     | 0.67      |      | 3.41  | 0.07      |      | 2.21  | 0.26  |      | Filamentous hemagglutinin family outer membrane protein |     |
| Pc_TC068589 | -1.77 | 0     | Down | 0     | 3.38E-011 |      | -7.13 | 2.99E-006 | Down | 0     | ##### |      | Expressed protein                                       |     |
| Pc_TC068606 | -2.09 | 0.04  | Down | -0.86 | 0.41      |      | -0.34 | 0.8       |      | 0.56  | 0.53  |      | Uncharacterized protein                                 |     |
| Pc_TC068613 | 3.4   | 0.02  | Up   | 0     | 0.67      |      | 1.31  | 0.68      |      | 0.21  | 1     |      | Expressed protein                                       |     |
| Pc_TC068635 | 1.08  | 0.57  |      | 2.7   | 0.05      | Up   | -0.5  | 0.95      |      | -0.79 | 0.84  |      | Expressed protein                                       | HRT |
| Pc_TC068639 | 4.12  | 0     | Up   | 0     | 0.67      |      | 2.2   | 0.34      |      | 0.21  | 1     |      | Expressed protein                                       |     |
| Pc_TC068641 | 6.13  | ##### | Up   | 0     | 0.02      |      | 6.72  | 1.21E-008 | Up   | 1.84  | 0.06  |      | Expressed protein                                       |     |
| Pc_TC068681 | 0     | 0.44  |      | 0.06  | 1         |      | 4.63  | 0         | Up   | 3.59  | 0.01  | Up   | Expressed protein                                       |     |
| Pc_TC068699 | 8.77  | ##### | Up   | 0     | 0.67      |      | 12.26 | 1.36E-018 | Up   | 0     | 0.54  |      | Expressed protein                                       |     |
| Pc_TC068704 | 1.35  | 0     | Up   | 0     | 4.89E-016 |      | 1.3   | 0.16      |      | 0.1   | 0.87  |      | COP1-interactive protein 1                              |     |
| Pc_TC068730 | 0.08  | 1     |      | -0.94 | 1         |      | 4.69  | 0         | Up   | 3.08  | 0.06  |      | Expressed protein                                       |     |
| Pc_TC068734 | 2.4   | 0.19  |      | 3.64  | 0.02      | Up   | 2.83  | 0.16      |      | 2.8   | 0.1   |      | Uncharacterized protein                                 |     |
| Pc_TC068739 | 4.81  | ##### | Up   | 0     | 0.67      |      | 3.46  | 0.06      |      | 1.95  | 0.36  |      | Expressed protein                                       |     |
| Pc_TC068750 | 3.25  | 0.03  | Up   | 0     | 0.67      |      | -1.5  | 0.85      |      | -1.37 | 0.88  |      | Expressed protein                                       |     |
| Pc_TC068756 | -0.08 | 0.92  |      | -0.71 | 0.39      |      | 2.72  | 0.01      | Up   | 1.5   | 0.04  | Up   | phosphoglucomutase,putative                             |     |
| Pc_TC068758 | 0.93  | 0.6   |      | 2.2   | 0.11      |      | 2.91  | 0.05      |      | 2.76  | 0.02  | Up   | Expressed protein                                       |     |
| Pc_TC068770 | 2.99  | 0.06  |      | 0     | 0.67      |      | 3.15  | 0.1       |      | 3.33  | 0.03  | Up   | Expressed protein                                       |     |
| Pc_TC068771 | 0.66  | 0.97  |      | -0.94 | 1         |      | 3.67  | 0.04      | Up   | 3.63  | 0.01  | Up   | Expressed protein                                       |     |
| Pc_TC068810 | 0.1   | 0.87  |      | 0.83  | 0.19      |      | -3.93 | 0         | Down | -1.74 | 0.02  | Down | Uncharacterized protein                                 |     |
| Pc_TC068811 | -0.97 | 0.08  |      | 0.45  | 0.46      |      | -1.72 | 0.1       |      | -2.89 | 0     | Down | Uncharacterized protein                                 |     |
| Pc_TC068812 | 1.28  | 0     | Up   | 1.43  | 0.01      | Up   | -2.02 | 0.06      |      | -1.18 | 0.08  |      | Uncharacterized protein                                 |     |
| Pc_TC068813 | -1.87 | 0.01  | Down | 0.11  | 0.88      |      | -0.95 | 0.39      |      | -0.98 | 0.19  |      | Expressed protein                                       |     |

|             |       |       |      |       |      |      |       |      |      |       |      |      |                                                 |            |
|-------------|-------|-------|------|-------|------|------|-------|------|------|-------|------|------|-------------------------------------------------|------------|
| Pc_TC068815 | 1.08  | 0.77  |      | 3.31  | 0.04 | Up   | -1.5  | 0.85 |      | 2.21  | 0.26 |      | Expressed protein                               |            |
| Pc_TC068823 | 1.66  | 0.19  |      | 2.6   | 0.03 | Up   | 1.24  | 0.48 |      | 1.63  | 0.22 |      | Expressed protein                               |            |
| Pc_TC068830 | 2.66  | 0.03  | Up   | 0     | 0.36 |      | 1.2   | 0.58 |      | 0.21  | 1    |      | Expressed protein                               |            |
| Pc_TC068846 | 3.17  | 0.04  | Up   | 1.06  | 0.8  |      | 0.09  | 1    |      | 2.08  | 0.3  |      | Putative uncharacterized protein                |            |
| Pc_TC068852 | -2.42 | 0.01  | Down | -0.49 | 0.6  |      | -0.17 | 0.9  |      | 0.29  | 0.74 |      | Expressed protein                               |            |
| Pc_TC068859 | 3.25  | 0     | Up   | 0     | 0.36 |      | 2.55  | 0.12 |      | 0.63  | 0.82 |      | Expressed protein                               |            |
| Pc_TC068861 | 2     | 0.04  | Up   | 2.09  | 0.05 |      | -0.82 | 0.69 |      | 0     | 1    |      | Expressed protein                               |            |
| Pc_TC068879 | 3.33  | 0.03  | Up   | 0     | 0.67 |      | 3.83  | 0.03 | Up   | 2.71  | 0.12 |      | Expressed protein                               |            |
| Pc_TC068884 | -0.45 | 0.46  |      | -1.54 | 0.05 | Down | 0.52  | 0.62 |      | -0.65 | 0.38 |      | Expressed protein                               |            |
| Pc_TC068891 | 2.46  | 0.04  | Up   | 1.44  | 0.37 |      | 0.35  | 0.95 |      | 0.47  | 0.87 |      | Expressed protein                               |            |
| Pc_TC068912 | 3.33  | 0.03  | Up   | 0     | 0.67 |      | 0.83  | 0.88 |      | 1.63  | 0.49 |      | Expressed protein                               |            |
| Pc_TC068920 | 0     | 1     |      | 4.15  | 0.03 | Up   | 0     | 0.87 |      | 0.63  | 1    |      | Expressed protein                               |            |
| Pc_TC068922 | -0.13 | 0.81  |      | 0.4   | 0.5  |      | -1.73 | 0.1  |      | -1.44 | 0.04 | Down | OSJNBa0033H08.2 protein                         |            |
| Pc_TC068932 | 1.08  | 0.65  |      | 3.33  | 0.02 | Up   | 0     | 0.36 |      | -0.96 | 0.86 |      | 6-phosphogluconate dehydrogenase family protein |            |
| Pc_TC068936 | 0.34  | 0.42  |      | 0.42  | 0.42 |      | -2.39 | 0.02 | Down | -0.64 | 0.29 |      | Expressed protein                               |            |
| Pc_TC068958 | 2.4   | 0.19  |      | 1.06  | 0.8  |      | 2.59  | 0.22 |      | 3.33  | 0.03 | Up   | Expressed protein                               |            |
| Pc_TC068961 | 2.08  | 0.54  |      | 3.96  | 0.05 | Up   | 0.5   | 1    |      | 1.63  | 0.71 |      | Expressed protein                               |            |
| Pc_TC068967 | 3.54  | 0.08  |      | 0     | 1    |      | 4.31  | 0.04 | Up   | 3.43  | 0.1  |      | Expressed protein                               |            |
| Pc_TC068976 | -0.7  | 0.28  |      | -2.98 | 0    | Down | -0.82 | 0.46 |      | -0.92 | 0.23 |      | Expressed protein                               |            |
| Pc_TC068977 | 1.27  | 0.08  |      | 1.97  | 0.01 | Up   | -0.38 | 0.78 |      | 1.18  | 0.16 |      | Expressed protein                               |            |
| Pc_TC068994 | 1.56  | 0.27  |      | 0.74  | 0.74 |      | 2.39  | 0.13 |      | 2.59  | 0.03 | Up   | Uncharacterized protein                         |            |
| Pc_TC069047 | 2.95  | 0.03  | Up   | 0     | 0.48 |      | 2.56  | 0.16 |      | 1.74  | 0.33 |      | Expressed protein                               |            |
| Pc_TC069049 | 3.47  | 0.02  | Up   | 0     | 0.67 |      | 0.5   | 1    |      | 1.21  | 0.69 |      | Patched family protein                          |            |
| Pc_TC069055 | 3.66  | 0.01  | Up   | 0     | 0.67 |      | 3.09  | 0.11 |      | 0.63  | 0.96 |      | Expressed protein                               |            |
| Pc_TC069076 | 2.66  | 0.12  |      | 3.52  | 0.03 | Up   | 0.09  | 1    |      | 0     | 0.54 |      | Expressed protein                               |            |
| Pc_TC069083 | 1.08  | 0.77  |      | -0.94 | 1    |      | 2.96  | 0.14 |      | 3.87  | 0.01 | Up   | Expressed protein                               |            |
| Pc_TC069116 | 4.33  | 0.01  | Up   | 0     | 1    |      | 2.5   | 0.42 |      | 1.21  | 0.89 |      | Expressed protein                               |            |
| Pc_TC069143 | 0.12  | 0.88  |      | -0.13 | 0.89 |      | -2.59 | 0.05 | Down | -2.2  | 0.02 | Down | Expressed protein                               |            |
| Pc_TC069144 | -0.19 | 0.79  |      | -0.81 | 0.32 |      | -1.9  | 0.11 |      | -1.69 | 0.05 | Down | Uncharacterized protein                         |            |
| Pc_TC069150 | -0.22 | 0.64  |      | 0.05  | 0.94 |      | -2.83 | 0.01 | Down | -1.75 | 0.01 | Down | Expressed protein                               |            |
| Pc_TC069190 | 4.25  | 0.01  | Up   | 0     | 1    |      | 2.67  | 0.36 |      | 0.63  | 1    |      | unknown protein                                 |            |
| Pc_TC069195 | 5.78  | ##### | Up   | 0     | 1    |      | 5.48  | 0    | Up   | 3.95  | 0.04 | Up   | temperature-induced lipocalin                   |            |
| Pc_TC069218 | 3.4   | 0.02  | Up   | 0     | 0.67 |      | 2.09  | 0.38 |      | 0.63  | 0.96 |      | Expressed protein                               |            |
| Pc_TC069232 | -0.81 | 0.58  |      | 0.53  | 0.7  |      | -2.61 | 0.18 |      | -4.08 | 0.04 | Down | Expressed protein                               |            |
| Pc_TC069234 | 3.54  | 0.01  | Up   | 0     | 0.67 |      | 3.79  | 0.03 | Up   | 0     | 0.54 |      | Expressed protein                               |            |
| Pc_TC069237 | 1.66  | 0.36  |      | 3.12  | 0.03 | Up   | 0     | 0.36 |      | 1.21  | 0.58 |      | DNA/RNA polymerases superfamily protein         |            |
| Pc_TC069243 | 2.78  | 0.1   |      | 3.38  | 0.04 | Up   | 0     | 0.53 |      | 1.21  | 0.69 |      | Expressed protein                               |            |
| Pc_TC069249 | 0.08  | 1     |      | 1.8   | 0.35 |      | 3.47  | 0.03 | Up   | 2.85  | 0.05 | Up   | Expressed protein                               |            |
| Pc_TC069250 | 1.08  | 0.77  |      | 3.52  | 0.03 | Up   | 0.5   | 1    |      | 0.21  | 1    |      | Expressed protein                               |            |
| Pc_TC069276 | 1.4   | 0.23  |      | 2.58  | 0.02 | Up   | -0.91 | 0.69 |      | -0.2  | 0.98 |      | Ribosomal protein S26e family protein           |            |
| Pc_TC069282 | 3.14  | 0.01  | Up   | 3.12  | 0.03 | Up   | 1.83  | 0.38 |      | 1.85  | 0.29 |      | Expressed protein                               |            |
| Pc_TC069287 | -1.62 | 0     | Down | -0.91 | 0.15 |      | 1.05  | 0.27 |      | 0.23  | 0.72 |      | Expressed protein                               | PBF-2-like |
| Pc_TC069288 | 2.66  | 0.31  |      | 4.23  | 0.02 | Up   | -0.5  | 1    |      | 1.95  | 0.58 |      | Expressed protein                               |            |
| Pc_TC069300 | 0.82  | 0.79  |      | 2.28  | 0.17 |      | 3.01  | 0.08 |      | 2.9   | 0.04 | Up   | Expressed protein                               |            |
| Pc_TC069304 | 4.4   | 0.01  | Up   | 0     | 1    |      | 3.2   | 0.21 |      | 0     | 0.9  |      | Peptidase C13 family                            |            |
| Pc_TC069320 | 0.61  | 0.11  |      | 1.1   | 0.02 | Up   | -1.62 | 0.09 |      | 0.77  | 0.16 |      | pleiotropic drug resistance 12                  |            |
| Pc_TC069324 | 2.66  | 0.31  |      | 4.15  | 0.03 | Up   | 0.5   | 1    |      | 0.63  | 1    |      | Expressed protein                               |            |
| Pc_TC069338 | 4.4   | 0.01  | Up   | 0     | 1    |      | 2.5   | 0.42 |      | 0     | 0.9  |      | Expressed protein                               |            |
| Pc_TC069344 | 3.89  | 0     | Up   | 0.06  | 1    |      | 3.93  | 0.03 | Up   | 1.95  | 0.36 |      | Expressed protein                               |            |
| Pc_TC069360 | 1.66  | 0.48  |      | 3.76  | 0.01 | Up   | 2.2   | 0.34 |      | 1.63  | 0.49 |      | Expressed protein                               |            |
| Pc_TC069372 | 2.08  | 0.3   |      | 3.38  | 0.04 | Up   | -0.5  | 1    |      | 0     | 0.54 |      | OSJNBa0073E02.10 protein                        |            |
| Pc_TC069382 | 3.11  | ##### | Up   | 0     | 0.02 |      | 1.43  | 0.28 |      | 0.3   | 0.83 |      | Expressed protein                               |            |
| Pc_TC069394 | 0     | 0.31  |      | -0.94 | 0.84 |      | 4.01  | 0.01 | Up   | 2.43  | 0.07 |      | Expressed protein                               |            |
| Pc_TC069398 | 1.3   | 0.35  |      | 0.8   | 0.67 |      | 3.17  | 0.03 | Up   | 1.74  | 0.18 |      | Expressed protein                               |            |
| Pc_TC069408 | 0.33  | 0.3   |      | 0.38  | 0.35 |      | -2.42 | 0.01 | Down | -1.22 | 0.02 | Down | Expressed protein                               |            |
| Pc_TC069431 | 3.66  | 0.06  |      | 1.64  | 0.75 |      | 4.55  | 0.03 | Up   | 4.15  | 0.02 | Up   | Expressed protein                               |            |
| Pc_TC069434 | 1.89  | 0.38  |      | 3.31  | 0.04 | Up   | 3.71  | 0.04 | Up   | 3.58  | 0.02 | Up   | Uncharacterized protein                         |            |
| Pc_TC069441 | 3.89  | 0     | Up   | 0     | 0.67 |      | 4.23  | 0.01 | Up   | 2.8   | 0.1  |      | homolog of mammalian P58IPK                     | TPR        |
| Pc_TC069482 | 0.5   | 0.27  |      | 0.81  | 0.14 |      | -3.96 | 0    | Down | -2.73 | 0    | Down | Expressed protein                               |            |
| Pc_TC069488 | -0.28 | 0.4   |      | 1.36  | 0    | Up   | -0.5  | 0.55 |      | -0.35 | 0.49 |      | Expressed protein                               |            |
| Pc_TC069489 | 4.4   | 0     | Up   | 0     | 0.67 |      | 3.96  | 0.02 | Up   | 2.95  | 0.08 |      | RNAhelicase-like 8                              |            |
| Pc_TC069499 | -0.92 | 1     |      | -0.94 | 1    |      | 4.03  | 0.02 | Up   | 3.27  | 0.04 | Up   | Expressed protein                               |            |

|             |       |       |      |       |           |      |       |           |      |       |      |      |                                                             |      |
|-------------|-------|-------|------|-------|-----------|------|-------|-----------|------|-------|------|------|-------------------------------------------------------------|------|
| Pc_TC069500 | 3.25  | 0.03  | Up   | 0     | 0.67      |      | 2.31  | 0.3       |      | 0.63  | 0.96 |      | Ribosomal protein S7p/S5e family protein                    |      |
| Pc_TC069507 | 1.4   | 0.61  |      | 1.64  | 0.53      |      | 4.63  | 0.01      | Up   | 2.95  | 0.08 |      | Expressed protein                                           |      |
| Pc_TC069520 | -0.34 | 1     |      | -0.94 | 0.84      |      | 3.73  | 0.01      | Up   | 2.33  | 0.09 |      | Expressed protein                                           |      |
| Pc_TC069523 | 2.66  | 0.12  |      | 1.06  | 0.8       |      | 3.59  | 0.05      | Up   | 3.02  | 0.07 |      | Expressed protein                                           |      |
| Pc_TC069526 | 1.74  | 0.16  |      | 2.47  | 0.04      | Up   | 1.01  | 0.6       |      | 1.21  | 0.41 |      | Uncharacterized protein                                     |      |
| Pc_TC069530 | 2.78  | 0.1   |      | 3.58  | 0.02      | Up   | 0     | 0.53      |      | 2.43  | 0.19 |      | Expressed protein                                           |      |
| Pc_TC069562 | 3.78  | 0.01  | Up   | 0     | 0.67      |      | 1.83  | 0.47      |      | 0     | 0.54 |      | Expressed protein                                           |      |
| Pc_TC069565 | 3.4   | 0.01  | Up   | 0     | 0.48      |      | 1.24  | 0.62      |      | 0     | 0.35 |      | Expressed protein                                           |      |
| Pc_TC069573 | 2.51  | 0.03  | Up   | 2.64  | 0.04      | Up   | -1.82 | 0.53      |      | -0.37 | 0.96 |      | Putative membrane protein                                   |      |
| Pc_TC069600 | -1.67 | 0.03  | Down | -1.57 | 0.08      |      | -1.06 | 0.37      |      | -1.5  | 0.08 |      | Expressed protein                                           |      |
| Pc_TC069613 | 0.22  | 0.83  |      | -0.04 | 1         |      | -3.4  | 0.03      | Down | -3.7  | 0.01 | Down | Expressed protein                                           |      |
| Pc_TC069620 | -0.54 | 0.37  |      | -0.92 | 0.2       |      | 2.01  | 0.04      | Up   | 1.58  | 0.01 | Up   | Expressed protein                                           |      |
| Pc_TC069637 | 0.35  | 0.51  |      | 1.57  | 0.01      | Up   | -1.72 | 0.11      |      | 0.28  | 0.68 |      | C2 calcium/lipid-binding and GRAM domain containing protein |      |
| Pc_TC069653 | 2.25  | 0.24  |      | 3.45  | 0.03      | Up   | 0     | 0.53      |      | -0.37 | 1    |      | Expressed protein                                           |      |
| Pc_TC069669 | 1.08  | 0.77  |      | 1.64  | 0.53      |      | 3.67  | 0.04      | Up   | 1.63  | 0.49 |      | Uncharacterized protein                                     |      |
| Pc_TC069690 | 3.54  | 0.01  | Up   | 2.06  | 0.36      |      | 1.67  | 0.53      |      | 1.63  | 0.49 |      | Expressed protein                                           |      |
| Pc_TC069692 | 4.08  | 0.02  | Up   | 0     | 1         |      | 4.41  | 0.03      | Up   | 2.43  | 0.39 |      | Expressed protein                                           |      |
| Pc_TC069722 | 0.41  | 0.44  |      | 0.71  | 0.25      |      | -3.21 | 0.01      | Down | -1.97 | 0.01 | Down | Expressed protein                                           |      |
| Pc_TC069730 | -1.45 | 0.01  | Down | -2.55 | 0         | Down | 0.73  | 0.46      |      | -2.1  | 0    | Down | Expressed protein                                           |      |
| Pc_TC069738 | 0     | 0.31  |      | 0     | 0.36      |      | 4.77  | 0         | Up   | 0     | 0.24 |      | Expressed protein                                           |      |
| Pc_TC069750 | 3.25  | 0.14  |      | 1.64  | 0.75      |      | 2.09  | 0.56      |      | 4.27  | 0.02 | Up   | Expressed protein                                           |      |
| Pc_TC069768 | 3.47  | 0.02  | Up   | 0     | 0.67      |      | 1.67  | 0.53      |      | 0.95  | 0.81 |      | Expressed protein                                           |      |
| Pc_TC069774 | 2.54  | 0.15  |      | 2.64  | 0.16      |      | -1.5  | 0.85      |      | 3.21  | 0.04 | Up   | Expressed protein                                           |      |
| Pc_TC069799 | 1.3   | 0.01  | Up   | 0.74  | 0.26      |      | 1.52  | 0.14      |      | 2.11  | 0    | Up   | phytochrome interacting factor 3                            | bHLH |
| Pc_TC069807 | 0.25  | 0.67  |      | 1.18  | 0.07      |      | -2.66 | 0.02      | Down | -0.81 | 0.27 |      | Expressed protein                                           |      |
| Pc_TC069808 | 0.08  | 1     |      | 1.64  | 0.53      |      | 3.46  | 0.06      |      | 3.43  | 0.02 | Up   | Uncharacterized protein                                     |      |
| Pc_TC069815 | -0.11 | 0.99  |      | 0.31  | 0.84      |      | 2.53  | 0.04      | Up   | 1.12  | 0.28 |      | Expressed protein                                           |      |
| Pc_TC069822 | 3.54  | 0.08  |      | 4.23  | 0.02      | Up   | 0     | 0.87      |      | 0.63  | 1    |      | Leucine-rich repeat protein kinase family protein           |      |
| Pc_TC069824 | 2.33  | 0.08  |      | 2.96  | 0.02      | Up   | 0.83  | 0.75      |      | -1.37 | 0.66 |      | Expressed protein                                           |      |
| Pc_TC069828 | 1.89  | 0.19  |      | 3.15  | 0.01      | Up   | 1.5   | 0.45      |      | 2.08  | 0.15 |      | Os09g0544400 protein                                        |      |
| Pc_TC069841 | 3.08  | 0.05  | Up   | 0     | 0.67      |      | 1.5   | 0.6       |      | -0.37 | 1    |      | Phospholipid-transporting ATPase 2                          |      |
| Pc_TC069849 | -0.51 | 1     |      | 3.33  | 0.02      | Up   | -2.08 | 0.63      |      | 0     | 0.35 |      | ABC-2 and Plant PDR ABC-type transporter family protein     |      |
| Pc_TC069852 | 2.78  | 0.1   |      | 4.1   | 0         | Up   | 1.31  | 0.68      |      | 1.21  | 0.69 |      | Expressed protein                                           |      |
| Pc_TC069874 | 4.29  | 0     | Up   | 3.76  | 0.01      | Up   | 2.31  | 0.3       |      | 4.63  | 0    | Up   | Expressed protein                                           |      |
| Pc_TC069877 | 2.66  | 0.12  |      | 3.38  | 0.04      | Up   | 1.09  | 0.77      |      | 2.33  | 0.22 |      | Expressed protein                                           |      |
| Pc_TC069878 | 0     | 0.64  |      | 0.06  | 1         |      | 3.79  | 0.03      | Up   | 2.33  | 0.22 |      | Putative uncharacterized protein                            |      |
| Pc_TC069890 | 2.08  | 0.3   |      | 0.06  | 1         |      | 3.75  | 0.04      | Up   | 2.95  | 0.08 |      | Expressed protein                                           |      |
| Pc_TC069905 | 1.4   | 0.61  |      | 3.38  | 0.04      | Up   | -1.5  | 0.85      |      | 0.63  | 0.96 |      | Expressed protein                                           |      |
| Pc_TC069908 | 3.54  | 0.08  |      | 2.38  | 0.46      |      | 3.09  | 0.24      |      | 4.33  | 0.01 | Up   | Expressed protein                                           |      |
| Pc_TC069911 | -0.13 | 0.84  |      | -1.84 | 0.02      | Down | 1.43  | 0.16      |      | 0.48  | 0.49 |      | Expressed protein                                           |      |
| Pc_TC069918 | 0.66  | 0.97  |      | 0     | 0.67      |      | 4.12  | 0.02      | Up   | 1.21  | 0.69 |      | multidrug resistance-associated protein 4                   |      |
| Pc_TC069920 | 2.33  | 0     | Up   | 0     | 4.69E-005 |      | 1.7   | 0.13      |      | 0.92  | 0.25 |      | peroxisomal NAD-malate dehydrogenase 1                      |      |
| Pc_TC069924 | 0.82  | 0.79  |      | 1.8   | 0.35      |      | 3.59  | 0.03      | Up   | 2.29  | 0.15 |      | Expressed protein                                           |      |
| Pc_TC069932 | 0     | 0.16  |      | -2.53 | 0.4       |      | 3.29  | 0.02      | Up   | 0.85  | 0.61 |      | Glucose-6-phosphate/phosphate translocator-related          |      |
| Pc_TC069951 | 4.25  | 0.01  | Up   | 0     | 1         |      | 3.31  | 0.19      |      | 2.21  | 0.47 |      | Expressed protein                                           |      |
| Pc_TC069957 | 4.27  | ##### | Up   | 0     | 0.48      |      | 3.92  | 0.01      | Up   | 1.5   | 0.44 |      | Expressed protein                                           |      |
| Pc_TC069963 | 1.66  | 0.72  |      | 2.64  | 0.36      |      | 4.79  | 0.02      | Up   | 3.8   | 0.05 |      | Expressed protein                                           |      |
| Pc_TC069966 | 1.08  | 0.97  |      | 3.96  | 0.05      | Up   | 3.2   | 0.21      |      | 0.63  | 1    |      | Putative mitochondrial ribosomal protein,L38                |      |
| Pc_TC069970 | 1.26  | 0     | Up   | 0.74  | 0.14      |      | 0.1   | 0.92      |      | 0.68  | 0.23 |      | Expressed protein                                           |      |
| Pc_TC069983 | 2.25  | 0.24  |      | 3.58  | 0.02      | Up   | 0.09  | 1         |      | -0.37 | 1    |      | Expressed protein                                           |      |
| Pc_TC069996 | 0.82  | 0.63  |      | 2.56  | 0.03      | Up   | 0.09  | 1         |      | 0.36  | 0.91 |      | Expressed protein                                           |      |
| Pc_TC070003 | 2.99  | 0.01  | Up   | 0     | 0.36      |      | 3.15  | 0.04      | Up   | 1.53  | 0.35 |      | Major facilitator superfamily protein                       |      |
| Pc_TC070007 | 3.54  | 0.01  | Up   | 0     | 0.67      |      | 3.83  | 0.03      | Up   | 2.63  | 0.14 |      | VIRB2-interacting protein 1                                 |      |
| Pc_TC070028 | 1.89  | 0.38  |      | 4.01  | 0.01      | Up   | 0     | 0.53      |      | 0.63  | 0.96 |      | Quinone reductase family protein                            |      |
| Pc_TC070048 | 3.17  | 0.04  | Up   | 2.23  | 0.29      |      | -0.5  | 1         |      | 1.63  | 0.49 |      | Expressed protein                                           |      |
| Pc_TC070049 | 1.91  | 0     | Up   | 0     | 4.78E-008 |      | 1.78  | 0.08      |      | -0.01 | 1    |      | Expressed protein                                           |      |
| Pc_TC070058 | 2.08  | 0.54  |      | 4.45  | 0.01      | Up   | 1.5   | 0.78      |      | 1.21  | 0.89 |      | Expressed protein                                           |      |
| Pc_TC070066 | 4.81  | ##### | Up   | 0     | 0.67      |      | 3.46  | 0.06      |      | 0.63  | 0.96 |      | Expressed protein                                           |      |
| Pc_TC070084 | 0.77  | 0.01  |      | 1.01  | 0.01      | Up   | -3.62 | 7.57E-005 | Down | -1.79 | 0    | Down | Expressed protein                                           |      |
| Pc_TC070105 | 0.66  | 0.97  |      | 0.06  | 1         |      | 4.23  | 0.01      | Up   | 2.33  | 0.22 |      | Expressed protein                                           |      |
| Pc_TC070107 | 1.08  | 0.57  |      | 1.06  | 0.62      |      | 3.09  | 0.05      | Up   | 1.08  | 0.57 |      | Inhibitor of apoptosis                                      |      |
| Pc_TC070108 | 4.17  | 0.02  | Up   | 0     | 1         |      | 4.31  | 0.04      | Up   | 1.21  | 0.89 |      | Expressed protein                                           |      |



|             |       |       |      |       |      |      |      |       |           |       |       |      |                                                         |                               |  |
|-------------|-------|-------|------|-------|------|------|------|-------|-----------|-------|-------|------|---------------------------------------------------------|-------------------------------|--|
| Pc_TC070114 | 4.66  | ##### | Up   | 0     | 0.67 |      | 5.23 | 0     | Up        | 3.58  | 0.02  | Up   | Expressed protein                                       |                               |  |
| Pc_TC070123 | 2.4   | 0.19  |      | 3.31  | 0.04 | Up   | 0    | 0.53  |           | -0.37 | 1     |      | Expressed protein                                       |                               |  |
| Pc_TC070131 | 1.29  | 0.11  |      | 3.02  | 0    | Up   |      | -0.96 | 0.52      | 1     | 0.3   |      | Expressed protein                                       |                               |  |
| Pc_TC070154 | 6.09  | ##### | Up   | 0     | 0.48 |      | 3.13 | 0.06  |           | 2.04  | 0.22  |      | Expressed protein                                       |                               |  |
| Pc_TC070185 | 3.08  | 0.05  | Up   | 3.7   | 0.02 | Up   |      | 0.09  | 1         |       | 2.08  | 0.3  | Expressed protein                                       |                               |  |
| Pc_TC070205 | 4.4   | 0.01  | Up   | 5.06  | 0    | Up   |      | 1.09  | 0.94      |       | 2.95  | 0.22 | Expressed protein                                       |                               |  |
| Pc_TC070220 | 3.74  | 0     | Up   | 0     | 0.48 |      |      | 2.01  | 0.32      |       | -0.37 | 1    | Expressed protein                                       |                               |  |
| Pc_TC070247 | 2.6   | 0.04  | Up   | 0     | 0.36 |      |      | 2.55  | 0.12      |       | 1.8   | 0.24 | Expressed protein                                       |                               |  |
| Pc_TC070253 | 4.89  | 0     | Up   | 0     | 1    |      |      | 1.09  | 0.94      |       | 0     | 0.9  | Expressed protein                                       |                               |  |
| Pc_TC070284 | 6.33  | ##### | Up   | 0     | 0.36 |      |      | 0.09  | 1         |       | -2.37 | 0.46 | Proline-rich protein                                    |                               |  |
| Pc_TC070302 | 0.4   | 0.96  |      | 2.81  | 0.04 | Up   |      | -0.91 | 0.82      |       | 0.63  | 0.82 | Ribosomal protein L2 family                             |                               |  |
| Pc_TC070306 | -0.36 | 0.56  |      | 0.53  | 0.44 |      |      | -3.66 | 0         | Down  | -2.25 | 0.01 | Down                                                    | Expressed protein             |  |
| Pc_TC070312 | 3.08  | 0.18  |      | 4.31  | 0.02 | Up   |      | 0.5   | 1         |       | 1.21  | 0.89 | Expressed protein                                       |                               |  |
| Pc_TC070321 | 3.89  | 0.04  | Up   | 1.64  | 0.75 |      |      | 2.83  | 0.32      |       | 2.43  | 0.39 | Expressed protein                                       |                               |  |
| Pc_TC070326 | 1.44  | 0.04  | Up   | 1     | 0.23 |      |      | -0.82 | 0.53      |       | 2.35  | 0    | Up                                                      | Expressed protein             |  |
| Pc_TC070343 | 3.4   | 0.1   |      | 4.23  | 0.02 | Up   |      | 3.96  | 0.08      |       | 3.71  | 0.06 | Expressed protein                                       |                               |  |
| Pc_TC070345 | 3.78  | 0.05  | Up   | 0     | 1    |      |      | 2.83  | 0.32      |       | -0.37 | 1    | Expressed protein                                       |                               |  |
| Pc_TC070354 | 3.99  | 0.03  | Up   | 0     | 1    |      |      | 2.83  | 0.32      |       | 0     | 0.9  | Expressed protein                                       |                               |  |
| Pc_TC070358 | 3.48  | ##### | Up   | 0     | 0.07 |      |      | 2.64  | 0.05      | Up    | 1.43  | 0.21 | 20S proteasome alpha subunit E2                         |                               |  |
| Pc_TC070359 | 6.69  | ##### | Up   | 0     | 0.67 |      |      | 4.03  | 0.02      | Up    | 1.21  | 0.69 | Expressed protein                                       |                               |  |
| Pc_TC070380 | 1.93  | 0.05  | Up   | 0     | 0.07 |      |      | 1.83  | 0.19      |       | 0.7   | 0.61 | Moricin-like peptide B                                  |                               |  |
| Pc_TC070392 | 2.78  | 0.02  | Up   | 0     | 0.36 |      |      | 1.5   | 0.45      |       | 0.8   | 0.73 | Uncharacterized protein                                 |                               |  |
| Pc_TC070409 | 0.25  | 0.71  |      | -0.19 | 0.83 |      |      | -2.01 | 0.1       |       | -1.83 | 0.04 | Down                                                    | Expressed protein             |  |
| Pc_TC070415 | 2.08  | 0.54  |      | 2.06  | 0.59 |      |      | 5     | 0.01      | Up    | 3.43  | 0.1  | Expressed protein                                       |                               |  |
| Pc_TC070455 | 3.99  | 0.03  | Up   | 0     | 1    |      |      | 2.96  | 0.28      |       | 0.63  | 1    | TCOP-1/cpn60 chaperonin family protein                  |                               |  |
| Pc_TC070472 | 5.08  | 0     | Up   | 0     | 1    |      |      | 4.09  | 0.06      |       | 1.95  | 0.58 | Expressed protein                                       |                               |  |
| Pc_TC070475 | 3.54  | 0.01  | Up   | 0     | 0.67 |      |      | 2.96  | 0.14      |       | 1.43  | 0.58 | Uncharacterized protein                                 |                               |  |
| Pc_TC070476 | 1.95  | 0.24  |      | 0.47  | 0.98 |      |      | 3.56  | 0.03      | Up    | 2.56  | 0.09 | Expressed protein                                       |                               |  |
| Pc_TC070492 | -5.3  | ##### | Down | -3.51 | 0    | Down |      | -4.87 | 0         | Down  | -3.94 | 0    | Down                                                    | Putative Spectrin alpha chain |  |
| Pc_TC070515 | 3.08  | 0.18  |      | 2.06  | 0.59 |      |      | 4.63  | 0.02      | Up    | 3.08  | 0.18 | Expressed protein                                       |                               |  |
| Pc_TC070521 | 0.66  | 0.18  |      | 1.48  | 0.01 | Up   |      | -4.93 | 9.79E-005 | Down  | -2.78 | 0    | Down                                                    | Expressed protein             |  |
| Pc_TC070535 | 2.59  | 0     | Up   | 0     | 0    |      |      | 3.1   | 0.01      | Up    | 0.36  | 0.74 | Expressed protein                                       |                               |  |
| Pc_TC070539 | 4.4   | 0     | Up   | 0     | 0.67 |      |      | 3.75  | 0.04      | Up    | 2.95  | 0.08 | AMP-dependent synthetase and ligase family protein      |                               |  |
| Pc_TC070554 | 3.78  | 0.05  | Up   | 2.38  | 0.46 |      |      | -0.5  | 1         |       | 2.43  | 0.39 | Expressed protein                                       |                               |  |
| Pc_TC070564 | 4.33  | 0.01  | Up   | 0     | 1    |      |      | 3.2   | 0.21      |       | 2.63  | 0.32 | Expressed protein                                       |                               |  |
| Pc_TC070571 | 0.78  | 0.06  |      | 0.67  | 0.2  |      |      | -2.75 | 0.01      | Down  | -1.06 | 0.09 | Expressed protein                                       |                               |  |
| Pc_TC070575 | 2.08  | 0.54  |      | 2.64  | 0.36 |      |      | 4.5   | 0.03      | Up    | 2.63  | 0.32 | Expressed protein                                       |                               |  |
| Pc_TC070582 | 2.66  | 0.06  |      | 3.06  | 0.03 | Up   |      | 1.24  | 0.62      |       | 1.63  | 0.38 | Uncharacterized protein                                 |                               |  |
| Pc_TC070596 | 3.08  | 0.05  | Up   | 0     | 0.67 |      |      | 1.09  | 0.77      |       | 0.63  | 0.96 | tRNA synthetase class I (I,L,M and V) family protein    |                               |  |
| Pc_TC070599 | 1.08  | 0.65  |      | 0.06  | 1    |      |      | 3.41  | 0.04      | Up    | 2.29  | 0.15 | Uncharacterized protein                                 |                               |  |
| Pc_TC070649 | 3.25  | 0.03  | Up   | 2.96  | 0.09 |      |      | 1.09  | 0.77      |       | 1.43  | 0.58 | Uncharacterized protein                                 |                               |  |
| Pc_TC070656 | 1.17  | 0.02  | Up   | -2.41 | 0    | Down |      | -2.02 | 0.07      |       | -0.14 | 0.84 | Tetratricopeptide repeat (TPR)-like superfamily protein | TPR                           |  |
| Pc_TC070657 | 0.45  | 0.36  |      | 0.18  | 0.77 |      |      | -2.97 | 0.01      | Down  | 0.06  | 0.93 | Tetratricopeptide repeat (TPR)-like superfamily protein | TPR                           |  |
| Pc_TC070663 | 3.99  | 0.03  | Up   | 2.06  | 0.59 |      |      | 3.09  | 0.24      |       | 3.08  | 0.18 | Expressed protein                                       |                               |  |
| Pc_TC070667 | 3.83  | 0     | Up   | 0     | 0.67 |      |      | 2.83  | 0.16      |       | -0.37 | 1    | Expressed protein                                       |                               |  |
| Pc_TC070669 | 2.71  | 0.02  | Up   | 0     | 0.27 |      |      | 2.47  | 0.12      |       | 0.89  | 0.63 | Uncharacterized protein                                 |                               |  |
| Pc_TC070679 | 3.66  | 0.06  |      | 0.06  | 1    |      |      | 4.71  | 0.02      | Up    | 4.33  | 0.01 | Up                                                      | Expressed protein             |  |
| Pc_TC070681 | 4.66  | 0     | Up   | 0     | 1    |      |      | 2.96  | 0.28      |       | 1.95  | 0.58 | Expressed protein                                       |                               |  |
| Pc_TC070692 | 3.78  | 0.05  | Up   | 3.64  | 0.09 |      |      | 1.5   | 0.78      |       | 3.43  | 0.1  | Expressed protein                                       |                               |  |
| Pc_TC070734 | 3.99  | 0.03  | Up   | 0     | 1    |      |      | 0     | 0.87      |       | 0     | 0.9  | Expressed protein                                       |                               |  |
| Pc_TC070762 | 3.78  | 0.05  | Up   | 3.52  | 0.11 |      |      | 3.67  | 0.12      |       | 3.95  | 0.04 | Up                                                      | Expressed protein             |  |
| Pc_TC070763 | 0.8   | 0.08  |      | 1.21  | 0.03 | Up   |      | -3.36 | 0         | Down  | 0.21  | 0.74 | Expressed protein                                       |                               |  |
| Pc_TC070788 | 2.94  | 0.01  | Up   | 0     | 0.36 |      |      | 1.59  | 0.41      |       | 0.21  | 1    | Cuticular protein PpolCPR38                             |                               |  |
| Pc_TC070790 | -3.35 | 0     | Down | -3.37 | 0    | Down |      | 0     | 0         |       | -3.81 | 0    | Down                                                    | Expressed protein             |  |
| Pc_TC070791 | 2.36  | 0     | Up   | 0     | 0.01 |      |      | 1.52  | 0.23      |       | -0.17 | 0.92 | Expressed protein                                       |                               |  |
| Pc_TC070798 | 1.66  | 0.48  |      | 1.64  | 0.53 |      |      | 3.71  | 0.04      | Up    | 0.21  | 1    | Expressed protein                                       |                               |  |
| Pc_TC070832 | -1.2  | 0.35  |      | 0.73  | 0.52 |      |      | -1.78 | 0.28      |       | -4.46 | 0.01 | Down                                                    | heat shock protein 90.1       |  |
| Pc_TC070837 | 2.66  | 0.31  |      | 4.06  | 0.04 | Up   |      | 2.09  | 0.56      |       | 2.21  | 0.47 | Uncharacterized protein                                 |                               |  |
| Pc_TC070854 | 4.66  | 0     | Up   | 0     | 1    |      |      | 1.5   | 0.78      |       | 0.63  | 1    | Expressed protein                                       |                               |  |
| Pc_TC070870 | 1.64  | 0.01  | Up   | -0.2  | 0.85 |      |      | -1.84 | 0.17      |       | -0.13 | 0.91 | Expressed protein                                       |                               |  |
| Pc_TC070875 | 0.77  | 0.14  |      | 1.29  | 0.03 | Up   |      | -2.43 | 0.03      | Down  | -0.8  | 0.26 | Expressed protein                                       |                               |  |
| Pc_TC070909 | 0.86  | 0.08  |      | 1.01  | 0.08 |      |      | -2.77 | 0.01      | Down  | 0.81  | 0.2  | Uncharacterized protein                                 |                               |  |

|             |       |       |      |  |       |           |      |  |       |           |      |       |      |      |                                                                             |
|-------------|-------|-------|------|--|-------|-----------|------|--|-------|-----------|------|-------|------|------|-----------------------------------------------------------------------------|
| Pc_TC070924 | 1.08  | 0.97  |      |  | 4.23  | 0.02      | Up   |  | 1.5   | 0.78      |      | 2.21  | 0.47 |      | Expressed protein                                                           |
| Pc_TC070933 | -0.04 | 1     |      |  | 1.06  | 0.2       |      |  | -3.2  | 0.03      | Down | -0.14 | 0.91 |      | Expressed protein                                                           |
| Pc_TC070999 | 3.54  | 0.01  | Up   |  | 0     | 0.67      |      |  | 0.5   | 1         |      | 0     | 0.54 |      | regulatory particle triple-A ATPase 5A                                      |
| Pc_TC071013 | 1.66  | 0     | Up   |  | 0     | 9.59E-011 |      |  | 0.68  | 0.5       |      | -0.61 | 0.38 |      | Ribosomal protein L10 family protein                                        |
| Pc_TC071055 | 2.49  | 0.01  | Up   |  | 0     | 0.09      |      |  | 1.95  | 0.17      |      | 0.46  | 0.79 |      | Expressed protein                                                           |
| Pc_TC071062 | 1.76  | 0.05  | Up   |  | 0     | 0.02      |      |  | 1.7   | 0.2       |      | 0.52  | 0.68 |      | Expressed protein                                                           |
| Pc_TC071071 | -0.21 | 0.86  |      |  | -2.75 | 0.04      | Down |  | 0.48  | 0.72      |      | 0.65  | 0.49 |      | DNA-directed RNA polymerase                                                 |
| Pc_TC071079 | 3.99  | 0.03  | Up   |  | 0     | 1         |      |  | 4.15  | 0.06      |      | 2.95  | 0.22 |      | Expressed protein                                                           |
| Pc_TC071089 | 1.43  | 0.03  | Up   |  | 1.59  | 0.03      | Up   |  | -0.29 | 0.82      |      | 0.45  | 0.59 |      | RING finger protein                                                         |
| Pc_TC071103 | 5.12  | ##### | Up   |  | 0     | 0.67      |      |  | 3.96  | 0.02      | Up   | 2.63  | 0.14 |      | regulatory particle triple-A ATPase 5A                                      |
| Pc_TC071120 | 3.03  | ##### | Up   |  | 0     | 0.02      |      |  | 3.02  | 0.01      | Up   | 1.08  | 0.29 |      | Expressed protein                                                           |
| Pc_TC071136 | 2.25  | 0.24  |      |  | 3.31  | 0.04      | Up   |  | 0.5   | 1         |      | 0.95  | 0.81 |      | Os11g0153700 protein                                                        |
| Pc_TC071137 | 2.37  | 0     | Up   |  | 0     | 0         |      |  | 2.24  | 0.05      |      | 0.91  | 0.32 |      | GRIM-19 protein                                                             |
| Pc_TC071139 | 4.08  | 0.02  | Up   |  | 2.64  | 0.36      |      |  | 4.46  | 0.03      | Up   | 3.8   | 0.05 |      | Expressed protein                                                           |
| Pc_TC071152 | 0.56  | 0.82  |      |  | -0.68 | 0.87      |      |  | 2.67  | 0.08      |      | 2.51  | 0.04 | Up   | Expressed protein                                                           |
| Pc_TC071183 | 3.17  | 0.04  | Up   |  | 3.23  | 0.05      |      |  | 0.83  | 0.88      |      | 2.33  | 0.22 |      | Uncharacterized protein                                                     |
| Pc_TC071186 | 3.99  | 0.03  | Up   |  | 0     | 1         |      |  | 2.5   | 0.42      |      | -0.37 | 1    |      | Expressed protein                                                           |
| Pc_TC071195 | 3.08  | 0.05  | Up   |  | 0     | 0.67      |      |  | 1.31  | 0.68      |      | 2.08  | 0.3  |      | Expressed protein                                                           |
| Pc_TC071207 | 5.31  | ##### | Up   |  | 0     | 0.67      |      |  | 3.9   | 0.03      | Up   | 4.02  | 0    | Up   | Expressed protein                                                           |
| Pc_TC071238 | 1.32  | 0.03  | Up   |  | 1.09  | 0.13      |      |  | -0.5  | 0.67      |      | 0.71  | 0.35 |      | Expressed protein                                                           |
| Pc_TC071239 | 3.89  | 0.04  | Up   |  | 0     | 1         |      |  | 1.83  | 0.66      |      | 1.63  | 0.71 |      | Expressed protein                                                           |
| Pc_TC071246 | 3.08  | 0.18  |      |  | 1.64  | 0.75      |      |  | 2.09  | 0.56      |      | 3.87  | 0.04 | Up   | Expressed protein                                                           |
| Pc_TC071271 | 0.44  | 0.46  |      |  | 0.54  | 0.44      |      |  | -2.55 | 0.03      | Down | -2.32 | 0.01 | Down | Putative retroelement                                                       |
| Pc_TC071278 | 2.13  | 0.05  | Up   |  | 0     | 0.15      |      |  | 2.63  | 0.07      |      | 1.52  | 0.23 |      | Late embryogenesis abundant protein (LEA) family protein                    |
| Pc_TC071279 | 2.4   | 0.19  |      |  | 1.06  | 0.8       |      |  | 3.59  | 0.05      | Up   | 2.21  | 0.26 |      | Expressed protein                                                           |
| Pc_TC071316 | 3.12  | 0.01  | Up   |  | 0     | 0.36      |      |  | 1.5   | 0.45      |      | 1.21  | 0.5  |      | N-terminal nucleophile aminohydrolases (Ntn hydrolases) superfamily protein |
| Pc_TC071338 | -0.09 | 0.89  |      |  | 0.35  | 0.6       |      |  | -2.36 | 0.04      | Down | -0.81 | 0.26 |      | Expressed protein                                                           |
| Pc_TC071346 | 3.58  | 0     | Up   |  | 0     | 0.48      |      |  | 3.83  | 0.02      | Up   | 1.95  | 0.25 |      | Expressed protein                                                           |
| Pc_TC071350 | 2.08  | 0.3   |      |  | 0     | 0.67      |      |  | 5.28  | 0         | Up   | 2.21  | 0.26 |      | Expressed protein                                                           |
| Pc_TC071381 | 0.41  | 0.4   |      |  | 1.51  | 0.01      | Up   |  | -3.51 | 0         | Down | -1.25 | 0.07 |      | Expressed protein                                                           |
| Pc_TC071383 | 0.08  | 1     |      |  | 2.38  | 0.03      | Up   |  | -0.17 | 0.99      |      | -1.37 | 0.47 |      | Translation elongation factor EF1B,gamma chain                              |
| Pc_TC071448 | -1.71 | 0.02  | Down |  | -0.16 | 0.85      |      |  | -3.71 | 0         | Down | -1.24 | 0.12 |      | Putative uncharacterized protein                                            |
| Pc_TC071449 | -0.86 | 0.3   |      |  | -0.94 | 0.33      |      |  | -3.21 | 0.03      | Down | -2.31 | 0.02 | Down | Putative uncharacterized protein                                            |
| Pc_TC071450 | 0.88  | 0.15  |      |  | 0.09  | 0.92      |      |  | -3.7  | 0.01      | Down | -1.11 | 0.18 |      | Expressed protein                                                           |
| Pc_TC071451 | 0.66  | 0.81  |      |  | 3.19  | 0.01      | Up   |  | -0.5  | 0.95      |      | -0.05 | 1    |      | Ribosomal protein L14p/L23e family protein                                  |
| Pc_TC071469 | 2.87  | 0     | Up   |  | 0     | 0.07      |      |  | 2.06  | 0.13      |      | 0.7   | 0.61 |      | Expressed protein                                                           |
| Pc_TC071477 | 2     | 0.04  | Up   |  | 0     | 0.07      |      |  | 2.04  | 0.14      |      | 0.11  | 1    |      | eukaryotic translation initiation factor 3G2                                |
| Pc_TC071503 | 4.54  | 0.01  | Up   |  | 0     | 1         |      |  | 5.09  | 0.01      | Up   | 1.95  | 0.58 |      | Myzus persicae-induced lipase 1                                             |
| Pc_TC071520 | 1.4   | 0.61  |      |  | 3.45  | 0.03      | Up   |  | 1.09  | 0.77      |      | -0.37 | 1    |      | Histone superfamily protein                                                 |
| Pc_TC071528 | 4.4   | 0     | Up   |  | 0     | 0.67      |      |  | 3.9   | 0.03      | Up   | 0.21  | 1    |      | Expressed protein                                                           |
| Pc_TC071537 | 3.63  | 0     | Up   |  | 0     | 0.36      |      |  | 2.03  | 0.25      |      | 1.33  | 0.44 |      | Expressed protein                                                           |
| Pc_TC071540 | 2.4   | 0.4   |      |  | 3.52  | 0.11      |      |  | 5.43  | 0         | Up   | 4.38  | 0.01 | Up   | Expressed protein                                                           |
| Pc_TC071545 | 1.4   | 0.19  |      |  | 2.2   | 0.04      | Up   |  | 0.64  | 0.71      |      | 0.63  | 0.66 |      | Endonuclease-reverse transcriptase                                          |
| Pc_TC071549 | -4.97 | 0     | Down |  | -1.82 | 0.11      |      |  | -2.54 | 0.08      |      | -2.25 | 0.05 | Down | Expressed protein                                                           |
| Pc_TC071553 | 3.89  | 0.04  | Up   |  | 2.38  | 0.46      |      |  | 1.09  | 0.94      |      | 0.63  | 1    |      | Expressed protein                                                           |
| Pc_TC071558 | 0.73  | 0.19  |      |  | 1.21  | 0.06      |      |  | -3.42 | 0.01      | Down | -0.72 | 0.33 |      | Expressed protein                                                           |
| Pc_TC071566 | 4.6   | 0     | Up   |  | 3.87  | 0.06      |      |  | 3.31  | 0.19      |      | 3.08  | 0.18 |      | Expressed protein                                                           |
| Pc_TC071576 | 0.56  | 0.82  |      |  | 2.54  | 0.05      | Up   |  | -0.23 | 1         |      | -0.11 | 1    |      | Translation protein SH3-like family protein                                 |
| Pc_TC071589 | 2.91  | 0     | Up   |  | 0     | 0.11      |      |  | 1.67  | 0.27      |      | -0.37 | 0.89 |      | Expressed protein                                                           |
| Pc_TC071597 | -0.09 | 0.89  |      |  | 0.14  | 0.85      |      |  | -6.85 | 8.44E-006 | Down | -3.14 | 0    | Down | Expressed protein                                                           |
| Pc_TC071613 | 1.4   | 0.61  |      |  | 0     | 0.67      |      |  | 3.63  | 0.05      | Up   | 1.63  | 0.49 |      | Expressed protein                                                           |
| Pc_TC071617 | 1.84  | 0     | Up   |  | -4.53 | 0         | Down |  | 1.52  | 0.17      |      | -0.79 | 0.39 |      | polyubiquitin 3                                                             |
| Pc_TC071634 | 2.66  | 0.31  |      |  | 4.06  | 0.04      | Up   |  | -0.5  | 1         |      | 0.63  | 1    |      | Expressed protein                                                           |
| Pc_TC071652 | 0.4   | 0.44  |      |  | 0.25  | 0.7       |      |  | -2.16 | 0.05      | Down | -1.05 | 0.14 |      | Os01g0117000 protein                                                        |
| Pc_TC071664 | 1.66  | 0.72  |      |  | 0     | 1         |      |  | 6.36  | 0         | Up   | 0     | 0.9  |      | GTP binding Elongation factor Tu family protein                             |
| Pc_TC071698 | 3.89  | 0.04  | Up   |  | 3.06  | 0.22      |      |  | 3.5   | 0.15      |      | 2.21  | 0.47 |      | Expressed protein                                                           |
| Pc_TC071703 | 3.66  | 0.01  | Up   |  | 0     | 0.67      |      |  | 2.41  | 0.27      |      | 1.63  | 0.49 |      | Expressed protein                                                           |
| Pc_TC071715 | 0.66  | 0.97  |      |  | 0.06  | 1         |      |  | 4.36  | 0.01      | Up   | 2.95  | 0.08 |      | Uncharacterized protein (Fragment)                                          |
| Pc_TC071722 | 3.54  | 0.08  |      |  | 4.52  | 0.01      | Up   |  | 2.31  | 0.48      |      | 2.95  | 0.22 |      | Expressed protein                                                           |
| Pc_TC071742 | 2.52  | 0     | Up   |  | 0     | 0.04      |      |  | -2.5  | 0.21      |      | -3.96 | 0.05 |      | Expressed protein                                                           |
| Pc_TC071761 | 0     | ##### |      |  | -4.43 | 0         | Down |  | 0     | 0         |      | -3.54 | 0    | Down | Muscle-specific protein 300                                                 |
| Pc_TC071778 | 0.66  | 0.45  |      |  | 0.43  | 0.7       |      |  | -0.33 | 0.83      |      | -2.64 | 0.04 | Down | Uncharacterized protein                                                     |

|             |       |       |      |       |           |      |       |      |      |       |       |                                            |
|-------------|-------|-------|------|-------|-----------|------|-------|------|------|-------|-------|--------------------------------------------|
| Pc_TC071791 | 3.6   | 0.01  | Up   | 0     | 0.67      |      | 3.41  | 0.07 |      | 1.21  | 0.69  | Major facilitator superfamily protein      |
| Pc_TC071795 | 0.46  | 0.16  |      | 1.12  | 0.01      | Up   | -1.58 | 0.07 |      | -0.51 | 0.33  | Expressed protein                          |
| Pc_TC071813 | -0.27 | 0.72  |      | 1.26  | 0.08      |      | -3.93 | 0.01 | Down | -1.27 | 0.15  | Expressed protein                          |
| Pc_TC071884 | 3.33  | 0.03  | Up   | 0     | 0.67      |      | 3.96  | 0.02 | Up   | 1.63  | 0.49  | Expressed protein                          |
| Pc_TC071898 | 2.08  | 0.54  |      | 4.15  | 0.03      | Up   | 0     | 0.87 |      | 0.63  | 1     | Tim10/DDP family zinc finger protein       |
| Pc_TC071918 | -2.03 | 0     | Down | -2.16 | 0.01      | Down | -0.04 | 0.98 |      | -1.14 | 0.14  | Expressed protein                          |
| Pc_TC071933 | 3.4   | 0.02  | Up   | 0     | 0.67      |      | 1.96  | 0.42 |      | 0.63  | 0.96  | Expressed protein                          |
| Pc_TC071939 | -0.28 | 0.58  |      | -1.53 | 0.02      | Down | 1.27  | 0.18 |      | 0.16  | 0.81  | Expressed protein                          |
| Pc_TC071958 | 4.17  | 0.02  | Up   | 4.38  | 0.02      | Up   | 1.09  | 0.94 |      | 4.02  | 0.03  | Up acetyl-CoA synthetase                   |
| Pc_TC072027 | 2.66  | 0.31  |      | 5.31  | 0         | Up   | 1.5   | 0.78 |      | 2.8   | 0.26  | Expressed protein                          |
| Pc_TC072048 | 3.4   | 0.1   |      | 4.23  | 0.02      | Up   | 2.09  | 0.56 |      | 0     | 0.9   | Expressed protein                          |
| Pc_TC072058 | 2.08  | 0.3   |      | 1.87  | 0.44      |      | 3.75  | 0.04 | Up   | 3.27  | 0.04  | Up Uncharacterized protein                 |
| Pc_TC072073 | 1.08  | 0.57  |      | -0.36 | 1         |      | 4.24  | 0    | Up   | 2.43  | 0.07  | Expressed protein                          |
| Pc_TC072087 | 3.72  | 0.01  | Up   | 3.87  | 0.01      | Up   | 0.09  | 1    |      | 2.53  | 0.16  | Expressed protein                          |
| Pc_TC072089 | 2.66  | 0.31  |      | 4.38  | 0.02      | Up   | 0     | 0.87 |      | 0.63  | 1     | Expressed protein                          |
| Pc_TC072098 | -0.59 | 0.57  |      | -0.53 | 0.65      |      | -0.61 | 0.67 |      | -2.54 | 0.04  | Down Expressed protein                     |
| Pc_TC072139 | -0.08 | 0.86  |      | 0.69  | 0.21      |      | -3.01 | 0.01 | Down | -2.03 | 0     | Down P260                                  |
| Pc_TC072144 | 0.66  | 0.97  |      | 3.87  | 0.01      | Up   | -0.5  | 1    |      | 0.95  | 0.81  | PDI-like 1-1                               |
| Pc_TC072153 | 3.17  | 0.04  | Up   | 2.96  | 0.09      |      | 0.5   | 1    |      | 1.8   | 0.42  | Expressed protein                          |
| Pc_TC072174 | 2.7   | 0     | Up   | 0     | 0.03      |      | 2.79  | 0.03 | Up   | 1.45  | 0.17  | Expressed protein                          |
| Pc_TC072176 | 0.25  | 0.53  |      | 0.89  | 0.07      |      | -2.82 | 0.01 | Down | -1.06 | 0.07  | Expressed protein                          |
| Pc_TC072208 | 5.63  | ##### | Up   | 0     | 1         |      | 2.83  | 0.32 |      | 4.33  | 0.01  | Up Expressed protein                       |
| Pc_TC072210 | 3.89  | 0.04  | Up   | 2.64  | 0.36      |      | -0.5  | 1    |      | 2.21  | 0.47  | Expressed protein                          |
| Pc_TC072244 | 3.17  | 0.04  | Up   | 2.96  | 0.09      |      | 0.09  | 1    |      | 1.21  | 0.69  | Expressed protein                          |
| Pc_TC072249 | 4.17  | 0.02  | Up   | 3.23  | 0.18      |      | 2.5   | 0.42 |      | 2.43  | 0.39  | Uncharacterized protein                    |
| Pc_TC072254 | 1.66  | 0.72  |      | 4.64  | 0.01      | Up   | 0     | 0.87 |      | 0     | 0.9   | Expressed protein                          |
| Pc_TC072282 | 0.24  | 0.44  |      | 0.47  | 0.23      |      | -3.17 | 0    | Down | -2.21 | ##### | Down Expressed protein                     |
| Pc_TC072283 | -1.66 | 0.18  |      | 2.62  | 0         | Up   | -2.5  | 0.13 |      | -0.89 | 0.46  | Uncharacterized protein                    |
| Pc_TC072324 | 3.08  | 0.18  |      | 3.96  | 0.05      | Up   | 1.83  | 0.66 |      | 3.43  | 0.1   | Expressed protein                          |
| Pc_TC072338 | 0.3   | 0.55  |      | 0.13  | 0.84      |      | -2.49 | 0.02 | Down | -0.13 | 0.85  | Expressed protein                          |
| Pc_TC072354 | -1.96 | 0.05  | Down | -1.83 | 0.1       |      | 0.36  | 0.78 |      | 0.59  | 0.51  | Expressed protein                          |
| Pc_TC072373 | -1.54 | 0.1   |      | -1.09 | 0.28      |      | -2.36 | 0.09 |      | -4.7  | 0     | Down Uncharacterized protein               |
| Pc_TC072375 | 1.79  | 0.04  | Up   | 1.3   | 0.23      |      | 0.02  | 1    |      | -1.18 | 0.4   | high-affinity K+ transporter 1             |
| Pc_TC072376 | -2.04 | 0.02  | Down | 0.45  | 0.6       |      | -3.03 | 0.03 | Down | -2.27 | 0.02  | Down Expressed protein                     |
| Pc_TC072420 | 0.44  | 0.34  |      | 0.31  | 0.09      |      | -3.42 | 0    | Down | -1.62 | 0.02  | Down Expressed protein                     |
| Pc_TC072426 | 3.78  | 0.05  | Up   | 3.64  | 0.09      |      | 2.67  | 0.36 |      | 0     | 0.9   | OSJNBb0115I09.14 protein                   |
| Pc_TC072434 | -0.06 | 0.9   |      | 1.01  | 0.07      |      | -2.94 | 0.01 | Down | 0.27  | 0.67  | Expressed protein                          |
| Pc_TC072468 | 0.08  | 1     |      | 0.64  | 0.98      |      | 4.26  | 0.01 | Up   | 1.8   | 0.42  | Expressed protein                          |
| Pc_TC072470 | 0.48  | 0.26  |      | 1.23  | 0.02      | Up   | -2.24 | 0.03 | Down | -0.8  | 0.19  | Expressed protein                          |
| Pc_TC072490 | 2.89  | 0.23  |      | 3.96  | 0.05      | Up   | 3.31  | 0.19 |      | 2.21  | 0.47  | Expressed protein                          |
| Pc_TC072496 | 0.23  | 0.59  |      | 0.69  | 0.19      |      | -2.42 | 0.02 | Down | -1.34 | 0.03  | Down Expressed protein                     |
| Pc_TC072507 | 3.4   | 0.1   |      | 3.64  | 0.09      |      | 4.75  | 0.02 | Up   | 4.15  | 0.02  | Up Expressed protein                       |
| Pc_TC072523 | 0.1   | 0.81  |      | 0.28  | 0.59      |      | -1.35 | 0.16 |      | -1.33 | 0.03  | Down Expressed protein                     |
| Pc_TC072538 | 0.17  | 0.74  |      | -0.03 | 0.97      |      | 0.25  | 0.81 |      | 1.57  | 0.01  | Up pleiotropic drug resistance 6           |
| Pc_TC072568 | 0.45  | 0.48  |      | 0.27  | 0.73      |      | -2.31 | 0.06 |      | -1.91 | 0.03  | Down Expressed protein                     |
| Pc_TC072574 | 4.4   | 0.01  | Up   | 0     | 1         |      | 2.96  | 0.28 |      | 1.21  | 0.89  | Expressed protein                          |
| Pc_TC072583 | 0.31  | 0.51  |      | 0.56  | 0.32      |      | -2.09 | 0.04 | Down | -1.44 | 0.03  | Down Expressed protein                     |
| Pc_TC072591 | 0.65  | 0.34  |      | 1.04  | 0.18      |      | -6.28 | 0    | Down | 0     | ##### | Expressed protein                          |
| Pc_TC072634 | 3.08  | 0.05  | Up   | 3.06  | 0.08      |      | 0     | 0.53 |      | 1.95  | 0.36  | Expressed protein                          |
| Pc_TC072641 | -0.47 | 0.29  |      | -0.88 | 0.12      |      | 1.77  | 0.05 | Up   | 1.27  | 0.02  | Up Uncharacterized protein                 |
| Pc_TC072659 | 1.29  | 0.03  | Up   | -0.54 | 0.49      |      | 0.76  | 0.48 |      | 0.89  | 0.22  | Expressed protein                          |
| Pc_TC072660 | 2.07  | 0     | Up   | 0     | 0         |      | 1.72  | 0.14 |      | -0.29 | 0.79  | Serine carboxypeptidase S28 family protein |
| Pc_TC072663 | 0.83  | 0.4   |      | 2.43  | 0.01      | Up   | 0.03  | 1    |      | 0.67  | 0.55  | Expressed protein                          |
| Pc_TC072689 | 1.75  | 0.01  | Up   | 0     | 0         |      | 1.03  | 0.39 |      | 0.22  | 0.83  | general regulatory factor 11               |
| Pc_TC072690 | 1.83  | 0     | Up   | 0     | 1.59E-009 |      | 1.57  | 0.12 |      | -0.04 | 0.96  | general regulatory factor 11               |
| Pc_TC072727 | 3.4   | 0.1   |      | 4.38  | 0.02      | Up   | 0     | 0.87 |      | 2.21  | 0.47  | heat shock protein 70                      |
| Pc_TC072788 | 0.11  | 0.85  |      | 0.5   | 0.42      |      | -2.23 | 0.04 | Down | -0.65 | 0.35  | Major facilitator superfamily protein      |
| Pc_TC072805 | 0.62  | 0.24  |      | 0.92  | 0.14      |      | -3.47 | 0    | Down | -1.54 | 0.04  | Down Expressed protein                     |
| Pc_TC072821 | -1.82 | 0.01  | Down | -0.39 | 0.62      |      | -0.15 | 0.9  |      | -0.41 | 0.61  | Expressed protein                          |
| Pc_TC072824 | 3.72  | 0.01  | Up   | 2.96  | 0.09      |      | 1.31  | 0.68 |      | 3.21  | 0.04  | Up Trypsin-like PiT2c                      |
| Pc_TC072828 | -1.92 | 0.1   |      | -4.53 | 0.01      | Down | -0.99 | 0.49 |      | -2.15 | 0.08  | Expressed protein                          |
| Pc_TC072830 | 1.66  | 0.48  |      | 0.64  | 0.98      |      | 3.83  | 0.03 | Up   | 1.21  | 0.69  | Expressed protein                          |

|             |       |       |      |       |           |      |       |           |      |       |       |      |                                                                            |
|-------------|-------|-------|------|-------|-----------|------|-------|-----------|------|-------|-------|------|----------------------------------------------------------------------------|
| Pc_TC072835 | 1.46  | 0.32  |      | 2.59  | 0.04      | Up   | 1.83  | 0.28      |      | 2.35  | 0.06  |      | Leucine-rich repeat (LRR) family protein                                   |
| Pc_TC072843 | -2.19 | 0.05  | Down | -2.21 | 0.08      |      | 0.26  | 0.86      |      | -1.06 | 0.32  |      | Expressed protein                                                          |
| Pc_TC072854 | 0.08  | 1     |      | 2.81  | 0.04      | Up   | -0.17 | 1         |      | 0.43  | 0.93  |      | Ribosomal protein S4                                                       |
| Pc_TC072889 | 3.78  | 0.05  | Up   | 1.64  | 0.75      |      | 2.31  | 0.48      |      | 1.63  | 0.71  |      | Expressed protein                                                          |
| Pc_TC072902 | 3.25  | 0.14  |      | 4.52  | 0.01      | Up   | 0     | 0.87      |      | 0.63  | 1     |      | Expressed protein                                                          |
| Pc_TC072907 | 1.08  | 0.65  |      | 2.17  | 0.21      |      | 3.38  | 0.04      | Up   | 2.85  | 0.05  | Up   | Putative polyprotein                                                       |
| Pc_TC072908 | 2.66  | 0.31  |      | 4.23  | 0.02      | Up   | 2.09  | 0.56      |      | 1.63  | 0.71  |      | Expressed protein                                                          |
| Pc_TC072930 | 3.08  | 0.05  | Up   | 3.15  | 0.06      |      | 1.5   | 0.6       |      | 1.43  | 0.58  |      | Expressed protein                                                          |
| Pc_TC072931 | -0.23 | 0.69  |      | -1.74 | 0.02      | Down | 2.54  | 0.01      | Up   | 2.11  | 0     | Up   | Expressed protein                                                          |
| Pc_TC072947 | 0.24  | 0.74  |      | 1.09  | 0.14      |      | -3.1  | 0.02      | Down | -1.44 | 0.1   |      | Expressed protein                                                          |
| Pc_TC072958 | 3.89  | 0     | Up   | 4.23  | 0         | Up   | 2.67  | 0.2       |      | 3.08  | 0.06  |      | Expressed protein                                                          |
| Pc_TC072965 | 1.42  | 0.04  | Up   | 0     | 0         |      | 2.02  | 0.07      |      | 1.08  | 0.19  |      | Expressed protein                                                          |
| Pc_TC072972 | 0.21  | 0.78  |      | 1.49  | 0.04      | Up   | -2.28 | 0.07      |      | -0.26 | 0.76  |      | Expressed protein                                                          |
| Pc_TC072977 | 4.17  | 0.02  | Up   | 3.64  | 0.09      |      | 2.09  | 0.56      |      | 1.95  | 0.58  |      | ARM repeat superfamily protein                                             |
| Pc_TC073008 | 0.66  | 0.97  |      | 0.64  | 0.98      |      | 3.09  | 0.11      |      | 3.21  | 0.04  | Up   | Expressed protein                                                          |
| Pc_TC073073 | 4.41  | ##### | Up   | 0     | 2.16E-018 |      | 3.91  | 2.42E-005 | Up   | 2.27  | ##### | Up   | Expressed protein                                                          |
| Pc_TC073082 | 2.49  | 0.09  |      | 2.93  | 0.05      | Up   | 0     | 0.36      |      | 0     | 0.35  |      | Expressed protein                                                          |
| Pc_TC073123 | 0.94  | 0.03  |      | 0.51  | 0.36      |      | -2.14 | 0.04      | Down | -0.62 | 0.33  |      | Lysine ketoglutarate reductase/saccharopine dehydrogenase                  |
| Pc_TC073184 | 0.4   | 0.23  |      | 0.31  | 0.47      |      | -2.51 | 0.01      | Down | -1.76 | 0     | Down | Putative retroelement                                                      |
| Pc_TC073189 | 0.66  | 0.72  |      | -0.94 | 0.74      |      | 3.38  | 0.02      | Up   | 1.5   | 0.27  |      | Expressed protein                                                          |
| Pc_TC073222 | -1.84 | 0.04  | Down | -0.8  | 0.39      |      | -0.16 | 0.91      |      | -2.08 | 0.04  | Down | Expressed protein                                                          |
| Pc_TC073240 | -0.24 | 0.82  |      | 0.51  | 0.6       |      | 0     | 0         |      | -4.28 | 0     | Down | Expressed protein                                                          |
| Pc_TC073245 | 1.87  | 0.03  | Up   | 0.67  | 0.58      |      | -0.4  | 0.83      |      | -0.58 | 0.68  |      | Uncharacterized protein                                                    |
| Pc_TC073302 | -1.76 | 0.04  | Down | -0.16 | 0.88      |      | -0.93 | 0.45      |      | 0     | 1     |      | Expressed protein                                                          |
| Pc_TC073306 | 3.89  | 0.04  | Up   | 0     | 1         |      | 4.59  | 0.02      | Up   | 3.33  | 0.12  |      | Expressed protein                                                          |
| Pc_TC073310 | 0.25  | 0.54  |      | 0.87  | 0.08      |      | -4.47 | 6.80E-005 | Down | -1.46 | 0.02  | Down | Expressed protein                                                          |
| Pc_TC073321 | 3.78  | 0.05  | Up   | 2.64  | 0.36      |      | 3.31  | 0.19      |      | 3.43  | 0.1   |      | Expressed protein                                                          |
| Pc_TC073334 | 1.4   | 0.61  |      | 0.64  | 0.98      |      | 3.63  | 0.05      | Up   | 2.87  | 0.09  |      | Expressed protein                                                          |
| Pc_TC073342 | 3.25  | 0.14  |      | 3.64  | 0.09      |      | 4.26  | 0.05      | Up   | 3.33  | 0.12  |      | OSINBa0028I23.25 protein                                                   |
| Pc_TC073343 | 1.08  | 0.97  |      | 4.06  | 0.04      | Up   | 0     | 0.87      |      | 1.21  | 0.89  |      | Expressed protein                                                          |
| Pc_TC073344 | -1.77 | 0.07  |      | -4.11 | 0         | Down | 0.33  | 0.8       |      | -0.22 | 0.84  |      | Expressed protein                                                          |
| Pc_TC073369 | -1.48 | 0.03  | Down | -0.58 | 0.44      |      | 2.01  | 0.05      | Up   | 1     | 0.15  |      | long chain acyl-CoA synthetase 9                                           |
| Pc_TC073451 | 3.4   | 0.1   |      | 4.23  | 0.02      | Up   | 1.83  | 0.66      |      | 0     | 0.9   |      | Expressed protein                                                          |
| Pc_TC073458 | 0.16  | 0.8   |      | 0.22  | 0.75      |      | -5.7  | 6.20E-005 | Down | -3.11 | 0     | Down | Expressed protein                                                          |
| Pc_TC073496 | 0.7   | 0.29  |      | -1.87 | 0.05      | Down | 1.36  | 0.21      |      | -0.45 | 0.6   |      | Putative uncharacterized protein                                           |
| Pc_TC073497 | -1.36 | 0.02  | Down | -1.53 | 0.03      | Down | -0.35 | 0.73      |      | -2.87 | 0     | Down | Putative uncharacterized protein                                           |
| Pc_TC073499 | 0.33  | 0.61  |      | 0.87  | 0.22      |      | 2.56  | 0.01      | Up   | 2.26  | 0     | Up   | Expressed protein                                                          |
| Pc_TC073500 | -1.64 | 0.01  | Down | -1.48 | 0.05      | Down | -0.77 | 0.47      |      | -0.83 | 0.25  |      | RNA-directed DNA polymerase (reverse transcriptase)-related family protein |
| Pc_TC073503 | 0.95  | 0.54  |      | 0.64  | 0.76      |      | 4.01  | 0         | Up   | 2.53  | 0.03  | Up   | Expressed protein                                                          |
| Pc_TC073540 | -1.92 | 0.1   |      | -1.07 | 0.38      |      | 2.32  | 0.05      | Up   | 0.87  | 0.36  |      | Expressed protein                                                          |
| Pc_TC073559 | 1.4   | 0.4   |      | 1.06  | 0.62      |      | 4.07  | 0.01      | Up   | 2.71  | 0.04  | Up   | Expressed protein                                                          |
| Pc_TC073570 | 1.89  | 0.38  |      | 1.87  | 0.44      |      | 2.5   | 0.25      |      | 3.58  | 0.02  | Up   | Uncharacterized protein                                                    |
| Pc_TC073575 | 1.66  | 0.16  |      | 2.46  | 0.03      | Up   | 2.28  | 0.12      |      | 2.7   | 0.01  | Up   | Uncharacterized protein                                                    |
| Pc_TC073587 | 3.78  | 0.05  | Up   | 3.87  | 0.06      |      | -0.5  | 1         |      | 1.21  | 0.89  |      | Expressed protein                                                          |
| Pc_TC073606 | 0.45  | 0.41  |      | 0.5   | 0.44      |      | -2.01 | 0.07      |      | -1.86 | 0.01  | Down | Expressed protein                                                          |
| Pc_TC073636 | -1.4  | 0.03  | Down | -0.69 | 0.33      |      | 1.17  | 0.25      |      | 0.79  | 0.24  |      | Expressed protein                                                          |
| Pc_TC073645 | 3.4   | 0.1   |      | 3.38  | 0.14      |      | 5.23  | 0.01      | Up   | 4.33  | 0.01  | Up   | Uncharacterized protein                                                    |
| Pc_TC073677 | 2.27  | 0     | Up   | 0     | 0         |      | 2.25  | 0.05      |      | 0.68  | 0.48  |      | nitrate reductase 2                                                        |
| Pc_TC073708 | -0.85 | 0.34  |      | -0.19 | 0.87      |      | 0     | 0         |      | -4.62 | 0     | Down | Expressed protein                                                          |
| Pc_TC073726 | 2.08  | 0.54  |      | 2.06  | 0.59      |      | 3.5   | 0.15      |      | 4.08  | 0.03  | Up   | Expressed protein                                                          |
| Pc_TC073733 | 2.66  | 0.31  |      | 4.15  | 0.03      | Up   | 1.5   | 0.78      |      | 2.21  | 0.47  |      | Expressed protein                                                          |
| Pc_TC073761 | 1.82  | 0.29  |      | 3.17  | 0.02      | Up   | 3.78  | 0.02      | Up   | 3.29  | 0.01  | Up   | Expressed protein                                                          |
| Pc_TC073781 | 1.08  | 0.57  |      | 2.76  | 0.04      | Up   | 0     | 0.26      |      | 0     | 0.24  |      | cinnamyl alcohol dehydrogenase 5                                           |
| Pc_TC073786 | -0.21 | 0.69  |      | -0.37 | 0.55      |      | -2.08 | 0.05      | Down | -0.72 | 0.27  |      | Expressed protein                                                          |
| Pc_TC073807 | 2.4   | 0.06  |      | 1.23  | 0.53      |      | 1.59  | 0.41      |      | 2.71  | 0.04  | Up   | DNA/RNA polymerases superfamily protein                                    |
| Pc_TC073818 | 1.66  | 0.48  |      | 1.87  | 0.44      |      | 2.75  | 0.18      |      | 3.21  | 0.04  | Up   | Expressed protein                                                          |
| Pc_TC073819 | 0.77  | 0.15  |      | 1.25  | 0.04      | Up   | -1.8  | 0.1       |      | -0.83 | 0.25  |      | Expressed protein                                                          |
| Pc_TC073932 | 1.08  | 0.97  |      | 0     | 1         |      | 4.26  | 0.05      | Up   | -0.37 | 1     |      | Expressed protein                                                          |
| Pc_TC073944 | 2.66  | 0.31  |      | 4.45  | 0.01      | Up   | 0     | 0.87      |      | 1.63  | 0.71  |      | Expressed protein                                                          |
| Pc_TC073968 | 0.67  | 0.08  |      | 0.68  | 0.15      |      | -2.74 | 0.01      | Down | -0.92 | 0.11  |      | Expressed protein                                                          |
| Pc_TC073975 | -1    | 0.03  | Down | -0.68 | 0.22      |      | 0.15  | 0.87      |      | -0.36 | 0.54  |      | Expressed protein                                                          |
| Pc_TC073983 | 0.3   | 0.55  |      | 0.57  | 0.33      |      | -1.92 | 0.07      |      | -1.73 | 0.01  | Down | Expressed protein                                                          |

|             |       |      |      |       |           |      |       |           |      |       |       |      |                                                                           |     |
|-------------|-------|------|------|-------|-----------|------|-------|-----------|------|-------|-------|------|---------------------------------------------------------------------------|-----|
| Pc_TC073996 | 0.89  | 0.68 |      | 1.23  | 0.53      |      | 4.95  | 0         | Up   | 3.38  | 0     | Up   | Expressed protein                                                         |     |
| Pc_TC074030 | -3.31 | 0.02 | Down | -1.75 | 0.19      |      | 1.13  | 0.38      |      | -1.18 | 0.33  |      | Expressed protein                                                         |     |
| Pc_TC074052 | -3.73 | 0.05 | Down | -2.75 | 0.13      |      | 0.5   | 0.76      |      | -2.18 | 0.15  |      | Expressed protein                                                         |     |
| Pc_TC074054 | -2.03 | 0    | Down | -0.18 | 0.81      |      | 0.69  | 0.51      |      | -0.06 | 0.95  |      | Expressed protein                                                         |     |
| Pc_TC074056 | -0.43 | 0.45 |      | -2.77 | 0         | Down | 1.01  | 0.31      |      | 0.42  | 0.53  |      | Os11g0550500 protein                                                      |     |
| Pc_TC074073 | 1.66  | 0.48 |      | 3.58  | 0.02      | Up   | 0     | 0.53      |      | 0     | 0.54  |      | Expressed protein                                                         |     |
| Pc_TC074074 | 1.96  | 0.01 | Up   | -3.75 | 0.01      | Down | 2.18  | 0.06      |      | 0.31  | 0.77  |      | tubulin beta-5 chain                                                      |     |
| Pc_TC074075 | 0.35  | 0.56 |      | 0.58  | 0.39      |      | -2.92 | 0.02      | Down | -1.48 | 0.06  |      | Expressed protein                                                         |     |
| Pc_TC074123 | 2.08  | 0.3  |      | 0.06  | 1         |      | 2.31  | 0.3       |      | 3.58  | 0.02  | Up   | Expressed protein                                                         |     |
| Pc_TC074156 | 0.08  | 1    |      | 1.06  | 0.98      |      | 5.81  | 0         | Up   | 0.63  | 1     |      | Ribosomal protein S8 family protein                                       |     |
| Pc_TC074168 | 1.49  | 0.44 |      | 3.33  | 0.02      | Up   | 0.92  | 0.76      |      | 0.85  | 0.76  |      | Translation protein SH3-like family protein                               |     |
| Pc_TC074187 | 3.08  | 0.18 |      | 2.64  | 0.36      |      | 5.03  | 0.01      | Up   | 4.21  | 0.02  | Up   | Expressed protein                                                         |     |
| Pc_TC074196 | 0.03  | 0.97 |      | -0.04 | 0.95      |      | 2.27  | 0.02      | Up   | 0.75  | 0.24  |      | sulfotransferase 2A                                                       |     |
| Pc_TC074284 | 0.7   | 0.1  |      | 0.7   | 0.19      |      | -2.27 | 0.03      | Down | -0.42 | 0.49  |      | Expressed protein                                                         |     |
| Pc_TC074293 | 1.08  | 0.97 |      | 3.96  | 0.05      | Up   | 0     | 0.87      |      | 0.63  | 1     |      | Expressed protein                                                         |     |
| Pc_TC074324 | 2.89  | 0.08 |      | 4.67  | 0         | Up   | 2.2   | 0.34      |      | 2.21  | 0.26  |      | Expressed protein                                                         |     |
| Pc_TC074328 | 1.24  | 0    | Up   | 2.12  | 9.88E-006 | Up   | 0.18  | 0.85      |      | 0.67  | 0.24  |      | Expressed protein                                                         |     |
| Pc_TC074341 | 0.38  | 0.38 |      | -0.48 | 0.4       |      | 0.97  | 0.29      |      | 1.83  | 0     | Up   | Expressed protein                                                         |     |
| Pc_TC074387 | 0.2   | 0.72 |      | 1.06  | 0.09      |      | -2.01 | 0.07      |      | -2.25 | 0     | Down | Expressed protein                                                         |     |
| Pc_TC074405 | 1.66  | 0.48 |      | 3.76  | 0.01      | Up   | 1.67  | 0.53      |      | 0.95  | 0.81  |      | Expressed protein                                                         |     |
| Pc_TC074416 | 2.08  | 0.54 |      | 3.96  | 0.05      | Up   | 0.5   | 1         |      | 2.8   | 0.26  |      | Expressed protein                                                         |     |
| Pc_TC074417 | 0.22  | 0.67 |      | 0.6   | 0.31      |      | -3.24 | 0         | Down | -2.3  | 0     | Down | Expressed protein                                                         |     |
| Pc_TC074446 | 2.4   | 0.4  |      | 4.45  | 0.01      | Up   | 0     | 0.87      |      | 2.21  | 0.47  |      | Expressed protein                                                         |     |
| Pc_TC074457 | 1.47  | 0.08 |      | 1.98  | 0.03      | Up   | 2.06  | 0.09      |      | 1.79  | 0.05  |      | Expressed protein                                                         |     |
| Pc_TC074542 | 0.25  | 0.7  |      | 0.66  | 0.37      |      | -2.74 | 0.03      | Down | -0.88 | 0.28  |      | Expressed protein                                                         |     |
| Pc_TC074551 | 2.89  | 0.23 |      | 4.58  | 0.01      | Up   | 2.09  | 0.56      |      | 2.21  | 0.47  |      | Expressed protein                                                         |     |
| Pc_TC074554 | 2.4   | 0.4  |      | 1.64  | 0.75      |      | 3.75  | 0.11      |      | 4.08  | 0.03  | Up   | Expressed protein                                                         |     |
| Pc_TC074556 | -1.26 | 0.04 | Down | -0.89 | 0.22      |      | -0.09 | 0.94      |      | 0.25  | 0.73  |      | Expressed protein                                                         |     |
| Pc_TC074574 | 1.08  | 0.77 |      | 3.45  | 0.03      | Up   | 1.5   | 0.6       |      | 0.63  | 0.96  |      | Expressed protein                                                         |     |
| Pc_TC074618 | 1.08  | 0.77 |      | 1.64  | 0.53      |      | 3.55  | 0.05      |      | 3.15  | 0.05  | Up   | Expressed protein                                                         |     |
| Pc_TC074630 | 0.82  | 0.79 |      | 0.8   | 0.82      |      | 3.28  | 0.05      | Up   | 1.5   | 0.44  |      | Expressed protein                                                         |     |
| Pc_TC074654 | 1.08  | 0.97 |      | 2.38  | 0.46      |      | 5.06  | 0.01      | Up   | 3.33  | 0.12  |      | Cellular retinaldehyde-binding protein                                    |     |
| Pc_TC074685 | 1.08  | 0.97 |      | 4.31  | 0.02      | Up   | 0.5   | 1         |      | 0.63  | 1     |      | Expressed protein                                                         |     |
| Pc_TC074686 | 1.09  | 0    | Up   | 1.17  | 0.01      | Up   | -2.81 | 0.01      | Down | -0.21 | 0.72  |      | Expressed protein                                                         |     |
| Pc_TC074704 | 0.13  | 0.86 |      | 0.06  | 0.96      |      | -2.62 | 0.03      | Down | -2.01 | 0.02  | Down | Expressed protein                                                         |     |
| Pc_TC074739 | 1.93  | 0.05 | Up   | 0     | 0.07      |      | 1.27  | 0.4       |      | 0.11  | 1     |      | Expressed protein                                                         |     |
| Pc_TC074752 | 0.42  | 0.42 |      | 0.32  | 0.62      |      | -2.55 | 0.02      | Down | -1.33 | 0.06  |      | Expressed protein                                                         |     |
| Pc_TC074769 | 0.91  | 0.47 |      | 2.17  | 0.05      | Up   | 0.66  | 0.72      |      | 0.63  | 0.67  |      | Expressed protein                                                         |     |
| Pc_TC074773 | 1.66  | 0.48 |      | -0.94 | 1         |      | 0     | 0.53      |      | 3.48  | 0.02  | Up   | terpene synthase 14                                                       |     |
| Pc_TC074802 | 1.66  | 0.72 |      | 4.06  | 0.04      | Up   | 1.5   | 0.78      |      | 1.21  | 0.89  |      | Expressed protein                                                         |     |
| Pc_TC074826 | 2.66  | 0.31 |      | 0     | 1         |      | 2.67  | 0.36      |      | 4.08  | 0.03  | Up   | Expressed protein                                                         |     |
| Pc_TC074852 | 1.08  | 0.97 |      | 3.76  | 0.07      |      | 2.96  | 0.28      |      | 3.95  | 0.04  | Up   | Expressed protein                                                         |     |
| Pc_TC074853 | 0.06  | 0.89 |      | -0.1  | 0.86      |      | -1.98 | 0.04      | Down | -1.5  | 0.01  | Down | Expressed protein                                                         |     |
| Pc_TC074902 | 0.53  | 0.23 |      | 1.13  | 0.03      | Up   | -7.24 | 1.70E-007 | Down | -3.48 | ##### | Down | Expressed protein                                                         |     |
| Pc_TC074909 | 2.08  | 0.04 | Up   | 0     | 0.11      |      | 1.79  | 0.23      |      | -0.05 | 1     |      | Glycine cleavage T-protein family                                         |     |
| Pc_TC074981 | 1.08  | 0.97 |      | 2.87  | 0.28      |      | 4.67  | 0.02      | Up   | 3.33  | 0.12  |      | Expressed protein                                                         |     |
| Pc_TC074988 | 3.89  | 0.04 | Up   | 3.23  | 0.18      |      | 5.53  | 0         | Up   | 4.53  | 0.01  | Up   | Expressed protein                                                         |     |
| Pc_TC075060 | 1.96  | 0    | Up   | 0     | 1.52E-005 |      | 1.4   | 0.21      |      | 0.1   | 0.92  |      | nascent polypeptide-associated complex subunit alpha-like protein 3       |     |
| Pc_TC075069 | -0.46 | 0.63 |      | 0.96  | 0.28      |      | -3.5  | 0.03      | Down | -1.79 | 0.1   |      | Expressed protein                                                         |     |
| Pc_TC075098 | 1.66  | 0.72 |      | 1.06  | 0.98      |      | 4.41  | 0.03      | Up   | 3.08  | 0.18  |      | Expressed protein                                                         |     |
| Pc_TC075104 | 0.19  | 0.69 |      | 0.99  | 0.07      |      | -2.51 | 0.02      | Down | -1.89 | 0     | Down | Late embryogenesis abundant (LEA) hydroxyproline-rich glycoprotein family |     |
| Pc_TC075106 | 0     | 1    |      | 1.06  | 0.98      |      | 4.41  | 0.03      | Up   | 1.63  | 0.71  |      | Expressed protein                                                         |     |
| Pc_TC075141 | 1.66  | 0.72 |      | 0     | 1         |      | 3.2   | 0.21      |      | 3.87  | 0.04  | Up   | Expressed protein                                                         |     |
| Pc_TC075170 | -1.22 | 0.06 |      | 1.35  | 0.03      | Up   | -3.25 | 0.01      | Down | -0.23 | 0.75  |      | Expressed protein                                                         | HRT |
| Pc_TC075175 | 2.08  | 0.54 |      | 2.06  | 0.59      |      | 4.26  | 0.05      | Up   | 2.95  | 0.22  |      | Expressed protein                                                         |     |
| Pc_TC075183 | 0.44  | 0.62 |      | -0.16 | 0.91      |      | 3.33  | 0         | Up   | 1.78  | 0.03  | Up   | Expressed protein                                                         |     |
| Pc_TC075191 | 0     | 1    |      | 3.96  | 0.05      | Up   | 0.5   | 1         |      | 0     | 0.9   |      | Expressed protein                                                         |     |
| Pc_TC075230 | 0.08  | 1    |      | 2.06  | 0.59      |      | 4.31  | 0.04      | Up   | 3.63  | 0.07  |      | Expressed protein                                                         |     |
| Pc_TC075291 | 1.66  | 0.48 |      | 4.06  | 0         | Up   | 2.31  | 0.3       |      | 2.33  | 0.22  |      | Expressed protein                                                         |     |
| Pc_TC075345 | 0     | 0.12 |      | 2.5   | 0.03      | Up   | -2.3  | 0.36      |      | 0     | 0.08  |      | heat shock cognate protein 70-1                                           | TPR |
| Pc_TC075351 | -2.58 | 0    | Down | -1.69 | 0.08      |      | -3.52 | 0.01      | Down | -0.43 | 0.63  |      | Uncharacterized protein                                                   |     |
| Pc_TC075352 | -0.21 | 0.78 |      | -2    | 0.03      | Down | -0.92 | 0.43      |      | -0.77 | 0.36  |      | Uncharacterized protein                                                   |     |

|             |       |       |      |       |           |      |       |      |      |       |       |      |                                                        |
|-------------|-------|-------|------|-------|-----------|------|-------|------|------|-------|-------|------|--------------------------------------------------------|
| Pc_TC075355 | -2.41 | 0.01  | Down | -3.43 | 0         | Down | 0.92  | 0.43 |      | 0.38  | 0.66  |      | Expressed protein                                      |
| Pc_TC075356 | -0.07 | 0.98  |      | -0.26 | 0.83      |      | 0.02  | 1    |      | 1.74  | 0.04  | Up   | Expressed protein                                      |
| Pc_TC075377 | 0     | 0.64  |      | 4.52  | 0         | Up   | 1.67  | 0.53 |      | -1.37 | 0.88  |      | Expressed protein                                      |
| Pc_TC075382 | 0.43  | 0.3   |      | 1.45  | 0         | Up   | -3.44 | 0    | Down | -1.56 | 0.01  | Down | Expressed protein                                      |
| Pc_TC075388 | 0     | 1     |      | 3.96  | 0.05      | Up   | 1.5   | 0.78 |      | -0.37 | 1     |      | serine acetyltransferase 2;2                           |
| Pc_TC075410 | -1.29 | 0.07  |      | -0.81 | 0.31      |      | -1.06 | 0.35 |      | -1.63 | 0.05  | Down | ATP binding microtubule motor family protein           |
| Pc_TC075421 | -0.95 | 0.12  |      | -1.7  | 0.02      | Down | -0.51 | 0.63 |      | -0.35 | 0.63  |      | Expressed protein                                      |
| Pc_TC075427 | -1.46 | 0.06  |      | -3.36 | 0         | Down | 0.07  | 0.96 |      | -1.42 | 0.11  |      | Expressed protein                                      |
| Pc_TC075590 | -0.3  | 0.72  |      | 0.43  | 0.62      |      | -2.27 | 0.09 |      | -2.37 | 0.02  | Down | Expressed protein                                      |
| Pc_TC075607 | 0     | 0.16  |      | 1.06  | 0.52      |      | 4.1   | 0    | Up   | 2.25  | 0.06  |      | Expressed protein                                      |
| Pc_TC075612 | 0.85  | 0.19  |      | 1.72  | 0.02      | Up   | -1.45 | 0.24 |      | 0.43  | 0.6   |      | Uncharacterized protein                                |
| Pc_TC075625 | 0.82  | 0.79  |      | 1.93  | 0.29      |      | 3.24  | 0.05 |      | 3.66  | 0     | Up   | Expressed protein                                      |
| Pc_TC075676 | 0.1   | 0.82  |      | 0.07  | 0.91      |      | -2.21 | 0.03 | Down | -0.81 | 0.18  |      | Expressed protein                                      |
| Pc_TC075706 | 0.86  | 0.57  |      | 2.38  | 0.04      | Up   | -1.3  | 0.58 |      | -0.18 | 1     |      | Expressed protein                                      |
| Pc_TC075735 | -0.27 | 0.42  |      | -0.24 | 0.58      |      | -1.9  | 0.03 | Down | -0.93 | 0.07  |      | DNA/RNA polymerases superfamily protein                |
| Pc_TC075756 | 0.08  | 1     |      | 2.06  | 0.59      |      | 4.46  | 0.03 | Up   | 3.53  | 0.09  |      | Expressed protein                                      |
| Pc_TC075760 | 1.04  | 0     | Up   | -0.4  | 0.42      |      | 0.19  | 0.83 |      | 2.22  | ##### | Up   | Expressed protein                                      |
| Pc_TC075781 | -0.36 | 0.66  |      | -2.42 | 0.02      | Down | 0.29  | 0.82 |      | -0.43 | 0.63  |      | Expressed protein                                      |
| Pc_TC075784 | 0.27  | 0.66  |      | 0.99  | 0.15      |      | -4.38 | 0    | Down | -3.15 | 0     | Down | Expressed protein                                      |
| Pc_TC075794 | 0.08  | 1     |      | 2.64  | 0.36      |      | 5.15  | 0.01 | Up   | 1.63  | 0.71  |      | Expressed protein                                      |
| Pc_TC075846 | 0     | 1     |      | 2.06  | 0.59      |      | 4.93  | 0.01 | Up   | 2.8   | 0.26  |      | Expressed protein                                      |
| Pc_TC075849 | -0.92 | 1     |      | 1.64  | 0.53      |      | 3.03  | 0.12 |      | 3.15  | 0.05  | Up   | Expressed protein                                      |
| Pc_TC075868 | 0     | 0.64  |      | 1.06  | 0.8       |      | 3.59  | 0.05 | Up   | -0.37 | 1     |      | cysteine-rich RLK (RECEPTOR-like protein kinase) 8     |
| Pc_TC075878 | -0.92 | 1     |      | 1.06  | 0.8       |      | 3.15  | 0.1  |      | 3.58  | 0.02  | Up   | Expressed protein                                      |
| Pc_TC075880 | 0     | 1     |      | 2.06  | 0.59      |      | 6.06  | 0    | Up   | 4.8   | 0     | Up   | Argonaute2 (AGO2)                                      |
| Pc_TC075899 | -0.32 | 0.64  |      | 0.8   | 0.26      |      | -0.65 | 0.57 |      | -1.63 | 0.05  | Down | Expressed protein                                      |
| Pc_TC075911 | 0.69  | 0.48  |      | 1.4   | 0.15      |      | -3.74 | 0.05 | Down | -1.3  | 0.3   |      | Glucose-repressible protein Grg1                       |
| Pc_TC075916 | 1.08  | 0.97  |      | 2.38  | 0.46      |      | 5.57  | 0    | Up   | 4.33  | 0.01  | Up   | Expressed protein                                      |
| Pc_TC075966 | 0.57  | 0.44  |      | 1.23  | 0.12      |      | -3.63 | 0.02 | Down | -2.37 | 0.02  | Down | Expressed protein                                      |
| Pc_TC075971 | 2.08  | 0.54  |      | 0     | 1         |      | 4.46  | 0.03 | Up   | 4.53  | 0.01  | Up   | Putative uncharacterized protein                       |
| Pc_TC075983 | -5.81 | ##### | Down | -2.83 | 0         | Down | -3.86 | 0    | Down | -3.74 | ##### | Down | Expressed protein                                      |
| Pc_TC075989 | 1.08  | 0.57  |      | 0.64  | 0.84      |      | 3.09  | 0.05 | Up   | -0.37 | 0.99  |      | Expressed protein                                      |
| Pc_TC075994 | 0     | 0.64  |      | 0     | 0.67      |      | 3.79  | 0.03 | Up   | 2.43  | 0.19  |      | Expressed protein                                      |
| Pc_TC076037 | 2     | 0.02  | Up   | 1.87  | 0.06      |      | 0.02  | 1    |      | 1.52  | 0.13  |      | Expressed protein                                      |
| Pc_TC076045 | 2.03  | 0.02  | Up   | 1.25  | 0.25      |      | 1.16  | 0.41 |      | -1.01 | 0.47  |      | Uncharacterized protein                                |
| Pc_TC076052 | 0     | 1     |      | 0     | 1         |      | 4.31  | 0.04 | Up   | 2.8   | 0.26  |      | Expressed protein                                      |
| Pc_TC076056 | -4.31 | 0.01  | Down | -2.01 | 0.15      |      | 1.93  | 0.11 |      | -0.07 | 1     |      | Uncharacterized protein                                |
| Pc_TC076062 | 3.25  | 0.01  | Up   | 0     | 0.48      |      | 2.73  | 0.12 |      | 1.95  | 0.25  |      | Expressed protein                                      |
| Pc_TC076068 | -0.21 | 0.79  |      | 0.57  | 0.47      |      | -2.22 | 0.08 |      | -1.9  | 0.04  | Down | Expressed protein                                      |
| Pc_TC076100 | 0.89  | 0.43  |      | 2.66  | 0.01      | Up   | -0.38 | 0.86 |      | 1.8   | 0.08  |      | Expressed protein                                      |
| Pc_TC076101 | -2.32 | 0     | Down | -2.08 | 0.02      | Down | -0.67 | 0.56 |      | -0.25 | 0.76  |      | Expressed protein                                      |
| Pc_TC076110 | -0.66 | 0.87  |      | 0     | 0.27      |      | 3.56  | 0.01 | Up   | -1.11 | 0.68  |      | Ribosomal protein L1p/L10e family                      |
| Pc_TC076114 | 0     | 1     |      | 1.06  | 0.98      |      | 5.46  | 0    | Up   | 3.08  | 0.18  |      | Expressed protein                                      |
| Pc_TC076143 | 0.7   | 0.09  |      | 1.19  | 0.02      | Up   | -4.22 | 0    | Down | -3.13 | ##### | Down | Expressed protein                                      |
| Pc_TC076145 | -1.09 | 0.55  |      | -2.11 | 0.33      |      | 4.09  | 0    | Up   | -1.54 | 0.39  |      | Ribosomal protein L30/L7 family protein                |
| Pc_TC076163 | 1.08  | 0.97  |      | 1.64  | 0.75      |      | 4.46  | 0.03 | Up   | 1.63  | 0.71  |      | DNA/RNA polymerases superfamily protein                |
| Pc_TC076189 | 0     | 1     |      | 0     | 1         |      | 5.57  | 0    | Up   | 3.21  | 0.15  |      | Expressed protein                                      |
| Pc_TC076289 | 0     | 1     |      | 0     | 1         |      | 6.5   | 0    | Up   | 0.63  | 1     |      | Ribosomal protein S4 (RPS4A) family protein            |
| Pc_TC076301 | 1.08  | 0.51  |      | 0.32  | 0.97      |      | 3.09  | 0.04 | Up   | 1.76  | 0.21  |      | Expressed protein                                      |
| Pc_TC076308 | 0.22  | 0.75  |      | 1.06  | 0.14      |      | -2.74 | 0.03 | Down | -1.37 | 0.11  |      | Expressed protein                                      |
| Pc_TC076328 | 0     | 1     |      | 0     | 1         |      | 6.06  | 0    | Up   | 0     | 0.9   |      | Expressed protein                                      |
| Pc_TC076332 | -2.83 | 0.02  | Down | -3.85 | 0.01      | Down | 1.59  | 0.18 |      | -2.7  | 0.03  | Down | GTP binding Elongation factor Tu family protein        |
| Pc_TC076333 | 0     | 1     |      | 0     | 1         |      | 5.03  | 0.01 | Up   | 0     | 0.9   |      | enolase 1                                              |
| Pc_TC076338 | -2.92 | 0.21  |      | 0     | 0.11      |      | 3.57  | 0.01 | Up   | -2.37 | 0.25  |      | Ribosomal protein S3Ae                                 |
| Pc_TC076346 | 0     | 0     |      | -3.94 | 0.01      | Down | 0     | 0    |      | -5.37 | 0     | Down | GTP binding Elongation factor Tu family protein        |
| Pc_TC076356 | 0     | 1     |      | 0     | 1         |      | 5.71  | 0    | Up   | 0     | 0.9   |      | Ribosomal protein L7Ae/L30e/S12e/Gadd45 family protein |
| Pc_TC076385 | 0     | ##### |      | -3.85 | 2.02E-006 | Down | 0.9   | 0.36 |      | -6.28 | ##### | Down | Expressed protein                                      |
| Pc_TC076396 | 0     | 0.64  |      | 0     | 0.67      |      | 3.67  | 0.04 | Up   | 0     | 0.54  |      | glyceraldehyde-3-phosphate dehydrogenase C subunit 1   |
| Pc_TC076400 | 0     | 0.64  |      | 0     | 0.67      |      | 4.15  | 0.02 | Up   | 0     | 0.54  |      | ribosomal protein L5 B                                 |
| Pc_TC076408 | 0.47  | 0.2   |      | 0.51  | 0.28      |      | -1.9  | 0.04 | Down | -0.45 | 0.42  |      | 40S ribosomal protein s25                              |
| Pc_TC076422 | 1.76  | 0     | Up   | 0     | 1.73E-007 |      | 1.27  | 0.23 |      | 0.37  | 0.62  |      | WupA                                                   |
| Pc_TC076424 | 1.98  | 0     | Up   | 0     | 9.94E-005 |      | 2.25  | 0.04 | Up   | 1.01  | 0.22  |      | Troponin I transcript variant A                        |

|             |       |      |      |       |           |      |       |      |      |       |       |      |                                                                            |     |
|-------------|-------|------|------|-------|-----------|------|-------|------|------|-------|-------|------|----------------------------------------------------------------------------|-----|
| Pc_TC076426 | 1.67  | 0    | Up   | 0     | 1.73E-007 |      | 1.94  | 0.06 |      | -0.16 | 0.84  |      | Expressed protein                                                          |     |
| Pc_TC076436 | -2.24 | 0.46 |      | -1.26 | 0.7       |      | 3.27  | 0.03 | Up   | 0     | 0.16  |      | Zinc-binding ribosomal protein family protein                              |     |
| Pc_TC076442 | 0     | 1    |      | 0     | 1         |      | 5     | 0.01 | Up   | 0     | 0.9   |      | S18 ribosomal protein                                                      |     |
| Pc_TC076444 | 0.08  | 1    |      | 0     | 1         |      | 4.5   | 0.03 | Up   | 0     | 0.9   |      | senescence associated gene 24                                              |     |
| Pc_TC076457 | 0.28  | 0.54 |      | 0.24  | 0.68      |      | -1.63 | 0.11 |      | -1.95 | 0     | Down | Expressed protein                                                          |     |
| Pc_TC076462 | 0.08  | 0.91 |      | 0.14  | 0.85      |      | -3.46 | 0    | Down | -0.48 | 0.52  |      | Uncharacterized protein                                                    |     |
| Pc_TC076483 | -1.51 | 0.77 |      | 0     | 0.48      |      | 3.9   | 0.01 | Up   | 0     | 0.35  |      | Ribosomal S17 family protein                                               |     |
| Pc_TC076490 | 2.08  | 0.54 |      | 4.31  | 0.02      | Up   | 0     | 0.87 |      | 3.53  | 0.09  |      | Expressed protein                                                          |     |
| Pc_TC076497 | 1.03  | 0.31 |      | 1.01  | 0.38      |      | 0.83  | 0.57 |      | 2.01  | 0.04  | Up   | Expressed protein                                                          |     |
| Pc_TC076499 | 0.05  | 0.95 |      | 0.89  | 0.17      |      | -2.67 | 0.02 | Down | -1.87 | 0.02  | Down | Expressed protein                                                          |     |
| Pc_TC076507 | 0.36  | 0.55 |      | 0.31  | 0.67      |      | 1.13  | 0.28 |      | 1.44  | 0.04  | Up   | Exostosin family protein                                                   | NAC |
| Pc_TC076511 | -2.12 | 0.02 | Down | -0.26 | 0.8       |      | 0.69  | 0.55 |      | 0.06  | 0.97  |      | Expressed protein                                                          |     |
| Pc_TC076514 | 2.72  | 0.03 | Up   | 2.31  | 0.11      |      | -2.5  | 0.48 |      | 0     | 0.24  |      | Uncharacterized protein                                                    |     |
| Pc_TC076520 | -1.57 | 0.05 | Down | -0.59 | 0.49      |      | 0.97  | 0.38 |      | 0.36  | 0.65  |      | Putative retrovirus-related pol polyprotein                                |     |
| Pc_TC076525 | 0.04  | 0.96 |      | 0.37  | 0.56      |      | -2.58 | 0.02 | Down | -2.52 | 0     | Down | Expressed protein                                                          |     |
| Pc_TC076538 | -0.41 | 0.41 |      | -0.2  | 0.73      |      | -3.83 | 0    | Down | -2.68 | 0     | Down | Expressed protein                                                          |     |
| Pc_TC076552 | -0.79 | 0.16 |      | -1.49 | 0.03      | Down | 1.39  | 0.15 |      | 0.47  | 0.47  |      | Expressed protein                                                          |     |
| Pc_TC076581 | 0.5   | 0.32 |      | 0.49  | 0.42      |      | -3.55 | 0    | Down | -1.65 | 0.02  | Down | Expressed protein                                                          |     |
| Pc_TC076583 | -1.92 | 0.07 |      | -3.36 | 0.01      | Down | 0.18  | 0.91 |      | -2.37 | 0.04  | Down | Os03g0229575 protein                                                       |     |
| Pc_TC076586 | 0.46  | 0.25 |      | 0.61  | 0.22      |      | -3.06 | 0    | Down | -1.03 | 0.08  |      | Expressed protein                                                          |     |
| Pc_TC076589 | 2     | 0.05 | Up   | 0.47  | 0.79      |      | 0.33  | 0.89 |      | 0.98  | 0.45  |      | Expressed protein                                                          |     |
| Pc_TC076596 | 1.48  | 0    | Up   | 0     | 1.59E-010 |      | 0.8   | 0.43 |      | -0.41 | 0.56  |      | 40s ribosomal protein SA                                                   |     |
| Pc_TC076603 | 0.26  | 0.72 |      | -0.99 | 0.27      |      | 1.66  | 0.13 |      | 1.67  | 0.02  | Up   | Expressed protein                                                          |     |
| Pc_TC076609 | -1.38 | 0.4  |      | 2.15  | 0.04      | Up   | -0.96 | 0.62 |      | -0.66 | 0.69  |      | Expressed protein                                                          |     |
| Pc_TC076614 | 2.29  | 0.02 | Up   | -1.94 | 0.4       |      | 1.59  | 0.3  |      | 1.98  | 0.08  |      | Expressed protein                                                          |     |
| Pc_TC076624 | 0.68  | 0.19 |      | 1.08  | 0.08      |      | -2.91 | 0.01 | Down | -1.13 | 0.11  |      | Expressed protein                                                          |     |
| Pc_TC076625 | 0.5   | 0.51 |      | 0.77  | 0.37      |      | -3.27 | 0.03 | Down | -2.73 | 0.01  | Down | Expressed protein                                                          |     |
| Pc_TC076627 | 0.41  | 0.37 |      | 0.84  | 0.13      |      | -2.58 | 0.01 | Down | -1.59 | 0.02  | Down | Expressed protein                                                          |     |
| Pc_TC076629 | 0.19  | 0.71 |      | 0.1   | 0.88      |      | -3.57 | 0    | Down | -1.94 | 0.01  | Down | Expressed protein                                                          |     |
| Pc_TC076634 | 0.41  | 0.61 |      | 0.66  | 0.45      |      | 1.57  | 0.17 |      | 1.64  | 0.04  | Up   | Expressed protein                                                          |     |
| Pc_TC076637 | -1.41 | 0.07 |      | -1.98 | 0.03      | Down | -0.38 | 0.75 |      | -0.22 | 0.8   |      | Expressed protein                                                          |     |
| Pc_TC076638 | 1.31  | 0.02 | Up   | 0     | 3.25E-007 |      | 1.37  | 0.2  |      | -0.98 | 0.23  |      | Translation elongation factor EF1B/ ribosomal protein S6 family protein    |     |
| Pc_TC076645 | -0.08 | 0.91 |      | 0.72  | 0.3       |      | -2.39 | 0.05 | Down | -2.68 | 0     | Down | Expressed protein                                                          |     |
| Pc_TC076651 | 0.33  | 0.63 |      | 0.77  | 0.31      |      | -3.98 | 0.01 | Down | -0.83 | 0.33  |      | Uncharacterized protein                                                    |     |
| Pc_TC076652 | 0.43  | 0.21 |      | 0.51  | 0.25      |      | -2.75 | 0    | Down | -1.27 | 0.02  | Down | Putative uncharacterized protein                                           |     |
| Pc_TC076655 | -0.08 | 0.9  |      | 0.56  | 0.4       |      | -2.4  | 0.04 | Down | -1.36 | 0.07  |      | Expressed protein                                                          |     |
| Pc_TC076660 | 0.44  | 0.28 |      | 0.67  | 0.18      |      | -3.32 | 0    | Down | -1.24 | 0.04  | Down | Expressed protein                                                          |     |
| Pc_TC076662 | -2.35 | 0.02 | Down | -1.91 | 0.07      |      | 0.36  | 0.77 |      | -0.19 | 0.86  |      | Uncharacterized protein (Fragment)                                         |     |
| Pc_TC076667 | 1.75  | 0.01 | Up   | 0     | 8.53E-005 |      | 0.63  | 0.6  |      | -1.08 | 0.25  |      | metallopeptidase M24 family protein                                        |     |
| Pc_TC076677 | -0.14 | 0.81 |      | -1.68 | 0.02      | Down | -0.48 | 0.64 |      | -2.28 | 0     | Down | RNA-directed DNA polymerase (reverse transcriptase)-related family protein |     |
| Pc_TC076702 | 0.27  | 0.61 |      | 0.37  | 0.55      |      | -2.74 | 0.02 | Down | -1.07 | 0.13  |      | Expressed protein                                                          |     |
| Pc_TC076704 | 0.15  | 0.64 |      | 0.85  | 0.03      |      | -2.52 | 0    | Down | -1.71 | 0     | Down | Expressed protein                                                          |     |
| Pc_TC076709 | -0.14 | 0.9  |      | -0.26 | 0.81      |      | -1.82 | 0.19 |      | -2.92 | 0.01  | Down | Expressed protein                                                          |     |
| Pc_TC076710 | 0.35  | 0.64 |      | 0.16  | 0.87      |      | -0.44 | 0.72 |      | -2.54 | 0.01  | Down | Expressed protein                                                          |     |
| Pc_TC076713 | 0.1   | 0.91 |      | 0.04  | 0.99      |      | -3.17 | 0.02 | Down | -3.2  | 0     | Down | Putative uncharacterized protein                                           |     |
| Pc_TC076714 | 1.39  | 0.04 | Up   | 1.98  | 0.01      | Up   | -1.83 | 0.16 |      | -0.96 | 0.3   |      | Putative uncharacterized protein                                           |     |
| Pc_TC076715 | -2.81 | 0    | Down | 1.04  | 0.18      |      | 0     | 0    |      | -5.08 | ##### | Down | Expressed protein                                                          |     |
| Pc_TC076719 | 1.66  | 0.06 |      | 3.03  | 0         | Up   | -1.08 | 0.52 |      | 1.33  | 0.19  |      | Uridine diphosphate glycosyltransferase 74E2                               |     |
| Pc_TC076720 | 1.64  | 0    | Up   | 2.39  | 0         | Up   | -3.21 | 0.01 | Down | 1.98  | 0     | Up   | Uridine diphosphate glycosyltransferase 74E2                               |     |
| Pc_TC076728 | -0.15 | 0.78 |      | 0.05  | 0.95      |      | -2.31 | 0.03 | Down | -1.31 | 0.06  |      | Expressed protein                                                          |     |
| Pc_TC076731 | 0.74  | 0.04 |      | -0.02 | 0.96      |      | -2.57 | 0.01 | Down | 0.49  | 0.35  |      | Expressed protein                                                          |     |
| Pc_TC076732 | 0.03  | 0.96 |      | 0.14  | 0.81      |      | -2.43 | 0.02 | Down | -0.74 | 0.26  |      | Expressed protein                                                          |     |
| Pc_TC076738 | -0.23 | 0.74 |      | 0.68  | 0.35      |      | -4.15 | 0    | Down | -3.37 | 0     | Down | Expressed protein                                                          |     |
| Pc_TC076748 | -2.55 | 0.02 | Down | -2.15 | 0.06      |      | -0.95 | 0.47 |      | -1.78 | 0.09  |      | Expressed protein                                                          |     |
| Pc_TC076751 | -1.17 | 0.2  |      | 0.81  | 0.35      |      | -2.94 | 0.05 | Down | -0.54 | 0.58  |      | Expressed protein                                                          |     |
| Pc_TC076803 | 1.3   | 0.01 | Up   | 0     | 9.59E-011 |      | 1.33  | 0.18 |      | 0.27  | 0.69  |      | Expressed protein                                                          |     |
| Pc_TC076804 | 0.32  | 0.56 |      | 0.3   | 0.66      |      | -3.39 | 0    | Down | -1.8  | 0.02  | Down | Expressed protein                                                          |     |
| Pc_TC076809 | 0.54  | 0.4  |      | -2.68 | 0         | Down | 0.47  | 0.67 |      | 0.68  | 0.36  |      | Expressed protein                                                          |     |
| Pc_TC076810 | 1.66  | 0.48 |      | 0.06  | 1         |      | 3.71  | 0.04 | Up   | 2.33  | 0.22  |      | Expressed protein                                                          |     |
| Pc_TC076817 | 0.48  | 0.46 |      | 0.06  | 0.96      |      | 1.78  | 0.09 |      | 1.59  | 0.03  | Up   | Expressed protein                                                          |     |
| Pc_TC076824 | 0.74  | 0.07 |      | 1.83  | 0         | Up   | -3.49 | 0    | Down | -1.6  | 0.01  | Down | Expressed protein                                                          |     |
| Pc_TC076835 | 0.26  | 0.63 |      | 0.1   | 0.88      |      | -2.62 | 0.02 | Down | -1.09 | 0.12  |      | Expressed protein                                                          |     |

|             |       |       |      |  |       |           |      |       |           |      |       |       |      |                                                                     |         |
|-------------|-------|-------|------|--|-------|-----------|------|-------|-----------|------|-------|-------|------|---------------------------------------------------------------------|---------|
| Pc_TC076850 | 2.08  | 0.3   |      |  | 2.52  | 0.2       |      | 3.71  | 0.04      | Up   | 3.27  | 0.04  | Up   | transcription regulators                                            |         |
| Pc_TC076876 | -0.7  | 0.41  |      |  | -0.46 | 0.64      |      | -0.68 | 0.6       |      | -1.99 | 0.05  | Down | Expressed protein                                                   |         |
| Pc_TC076888 | 0.06  | 0.95  |      |  | -0.09 | 0.92      |      | -2.5  | 0.05      | Down | -0.97 | 0.24  |      | Uncharacterized protein                                             |         |
| Pc_TC076907 | -0.49 | 0.5   |      |  | 2.16  | 0         | Up   | -1.48 | 0.22      |      | 0.68  | 0.38  |      | Expressed protein                                                   |         |
| Pc_TC076910 | 1.14  | 0     | Up   |  | 1.34  | 0.01      | Up   | -4.46 | 8.16E-005 | Down | -0.2  | 0.74  |      | Expressed protein                                                   |         |
| Pc_TC076915 | 0.5   | 0.45  |      |  | 0.64  | 0.4       |      | 0.93  | 0.4       |      | 1.9   | 0.01  | Up   | Expressed protein                                                   |         |
| Pc_TC076917 | -2.98 | 0.02  | Down |  | -0.34 | 0.79      |      | -2.14 | 0.16      |      | -1.21 | 0.28  |      | Expressed protein                                                   |         |
| Pc_TC076934 | -2.62 | 0.03  | Down |  | -2.64 | 0.05      |      | 0.29  | 0.84      |      | -0.03 | 1     |      | Expressed protein                                                   |         |
| Pc_TC076939 | -0.35 | 0.7   |      |  | 0.33  | 0.73      |      | -2.97 | 0.04      | Down | -2.08 | 0.05  | Down | Expressed protein                                                   |         |
| Pc_TC076940 | 0.38  | 0.64  |      |  | 0.68  | 0.44      |      | -5.78 | 0         | Down | 0     | ##### |      | Expressed protein                                                   |         |
| Pc_TC076944 | 0.45  | 0.35  |      |  | 0.56  | 0.33      |      | -2.22 | 0.04      | Down | -1.88 | 0.01  | Down | Expressed protein                                                   |         |
| Pc_TC076951 | 0.01  | 1     |      |  | -0.57 | 0.44      |      | 1.85  | 0.07      |      | 1.82  | 0.01  | Up   | Expressed protein                                                   |         |
| Pc_TC076982 | -0.59 | 0.49  |      |  | 0.16  | 0.89      |      | -3.92 | 0.01      | Down | -0.99 | 0.3   |      | Expressed protein                                                   |         |
| Pc_TC076985 | 1.57  | 0     | Up   |  | 0     | 1.15E-009 |      | 2.07  | 0.04      | Up   | 1.08  | 0.11  |      | GNS1/SUR4 membrane protein family                                   |         |
| Pc_TC076990 | 0.52  | 0.4   |      |  | 0.85  | 0.22      |      | -2.02 | 0.09      |      | -1.94 | 0.02  | Down | Expressed protein                                                   |         |
| Pc_TC076991 | 0.15  | 0.93  |      |  | -0.09 | 0.99      |      | -3.82 | 0.04      | Down | -1.37 | 0.27  |      | Fatty acid hydroxylase superfamily                                  |         |
| Pc_TC077011 | 2     | 0     | Up   |  | 0     | 8.90E-006 |      | 1.81  | 0.09      |      | 1.11  | 0.14  |      | calmodulin-like 11                                                  |         |
| Pc_TC077016 | 2.8   | 0.01  | Up   |  | -0.26 | 1         |      | 1.18  | 0.54      |      | 1.21  | 0.45  |      | Expressed protein                                                   |         |
| Pc_TC077020 | 0.21  | 0.67  |      |  | 0.31  | 0.6       |      | -2.83 | 0.01      | Down | -1.86 | 0.01  | Down | Expressed protein                                                   |         |
| Pc_TC077022 | -2.22 | 0.01  | Down |  | -3.47 | 0         | Down | -0.63 | 0.59      |      | -4.9  | ##### | Down | Uncharacterized protein                                             |         |
| Pc_TC077024 | 1.82  | 0.02  | Up   |  | 1.98  | 0.03      | Up   | 1.01  | 0.44      |      | 2.03  | 0.02  | Up   | Uncharacterized protein                                             |         |
| Pc_TC077028 | -0.56 | 0.58  |      |  | -0.66 | 0.56      |      | -5.3  | 0.01      | Down | -3.18 | 0.01  | Down | Putative uncharacterized protein                                    |         |
| Pc_TC077029 | 0.57  | 0.32  |      |  | 0.13  | 0.87      |      | -1.3  | 0.24      |      | -1.85 | 0.02  | Down | Putative uncharacterized protein                                    |         |
| Pc_TC077037 | -0.02 | 1     |      |  | 0.06  | 0.98      |      | -1.74 | 0.18      |      | -2.06 | 0.04  | Down | Expressed protein                                                   |         |
| Pc_TC077038 | -0.18 | 0.77  |      |  | -0.44 | 0.54      |      | -2.06 | 0.07      |      | -1.57 | 0.04  | Down | unknown protein                                                     |         |
| Pc_TC077039 | 0.4   | 0.45  |      |  | 0.04  | 0.96      |      | -2.6  | 0.02      | Down | -1.2  | 0.09  |      | Expressed protein                                                   |         |
| Pc_TC077043 | -0.02 | 1     |      |  | 0.03  | 0.99      |      | -0.45 | 0.69      |      | -1.88 | 0.03  | Down | Expressed protein                                                   |         |
| Pc_TC077045 | -0.31 | 0.67  |      |  | 0.44  | 0.57      |      | -2.3  | 0.06      |      | -2.39 | 0.01  | Down | Expressed protein                                                   |         |
| Pc_TC077048 | 0.66  | 0.5   |      |  | 1.06  | 0.31      |      | -4.67 | 0.03      | Down | -0.22 | 0.89  |      | Expressed protein                                                   |         |
| Pc_TC077059 | 1.08  | 0.97  |      |  | 1.64  | 0.75      |      | 5.5   | 0         | Up   | 4.08  | 0.03  | Up   | Homeodomain-like superfamily protein                                | G2-like |
| Pc_TC077060 | 2.93  | ##### | Up   |  | 1.4   | 0.09      |      | 0.35  | 0.79      |      | 2.14  | 0.01  | Up   | Homeodomain-like superfamily protein                                | G2-like |
| Pc_TC077074 | -0.6  | 0.23  |      |  | -0.01 | 0.99      |      | -0.81 | 0.42      |      | -1.55 | 0.02  | Down | Expressed protein                                                   |         |
| Pc_TC077076 | -0.24 | 0.95  |      |  | 0.74  | 0.6       |      | 2.94  | 0.03      | Up   | 1.47  | 0.19  |      | Expressed protein                                                   |         |
| Pc_TC077079 | -0.16 | 0.85  |      |  | -2.34 | 0.02      | Down | 0.15  | 0.91      |      | 0.28  | 0.75  |      | Expressed protein                                                   |         |
| Pc_TC077090 | -0.12 | 0.83  |      |  | 0.3   | 0.63      |      | -3.56 | 0         | Down | -1.39 | 0.05  | Down | Expressed protein                                                   |         |
| Pc_TC077093 | 1.56  | 0.13  |      |  | 2.8   | 0         | Up   | 1.96  | 0.16      |      | 3     | 0     | Up   | protein kinase family protein                                       |         |
| Pc_TC077095 | 1.73  | 0.14  |      |  | -1.75 | 0.48      |      | 2.78  | 0.05      | Up   | 2.14  | 0.07  |      | Metallo-hydrolase/oxidoreductase superfamily protein                |         |
| Pc_TC077109 | 0.84  | 0.11  |      |  | 0.03  | 0.97      |      | -3.74 | 0         | Down | 0.68  | 0.31  |      | Uncharacterized protein                                             |         |
| Pc_TC077110 | 1.26  | 0.03  | Up   |  | 2.54  | 7.85E-005 | Up   | -4.58 | 0         | Down | -1.57 | 0.06  |      | Os06g0714200 protein (Fragment)                                     |         |
| Pc_TC077112 | -0.2  | 0.72  |      |  | 0.22  | 0.72      |      | -3.95 | 0         | Down | -1.76 | 0.01  | Down | Expressed protein                                                   |         |
| Pc_TC077115 | 0.9   | 0.19  |      |  | 1.55  | 0.04      | Up   | -2.27 | 0.09      |      | 0.68  | 0.41  |      | Expressed protein                                                   |         |
| Pc_TC077136 | -2.99 | 0     | Down |  | -1.11 | 0.17      |      | -1.32 | 0.25      |      | -0.81 | 0.31  |      | Expressed protein                                                   |         |
| Pc_TC077138 | -0.78 | 0.19  |      |  | 0.09  | 0.9       |      | -0.18 | 0.86      |      | -1.76 | 0.02  | Down | Expressed protein                                                   |         |
| Pc_TC077150 | -2.92 | 0.03  | Down |  | -1.36 | 0.27      |      | -0.17 | 0.92      |      | -0.26 | 0.84  |      | Expressed protein                                                   |         |
| Pc_TC077168 | 1.65  | 0.03  | Up   |  | 0.7   | 0.47      |      | 0     | 1         |      | 1.51  | 0.08  |      | I-branching beta-1,6-N-acetylglucosaminyltransferase family protein |         |
| Pc_TC077172 | -2.3  | 0.05  |      |  | -3.64 | 0.02      | Down | -0.55 | 0.7       |      | 0.71  | 0.46  |      | Expressed protein                                                   |         |
| Pc_TC077177 | -3.92 | 0.03  | Down |  | -3.94 | 0.05      | Down | -0.59 | 0.73      |      | -0.2  | 0.91  |      | ARM repeat superfamily protein                                      |         |
| Pc_TC077180 | -0.39 | 0.56  |      |  | 0.41  | 0.57      |      | -4.45 | 0         | Down | -3.59 | 0     | Down | Expressed protein                                                   |         |
| Pc_TC077186 | -3.7  | 0     | Down |  | -0.97 | 0.29      |      | 1.17  | 0.29      |      | 0.27  | 0.76  |      | Basic-leucine zipper (bZIP) transcription factor family protein     |         |
| Pc_TC077189 | 0.61  | 0.04  |      |  | 0.78  | 0.04      |      | -4.57 | 1.52E-006 | Down | -1.44 | 0     | Down | Expressed protein                                                   |         |
| Pc_TC077206 | 0.31  | 0.54  |      |  | -0.81 | 0.21      |      | 1.04  | 0.28      |      | 1.27  | 0.04  | Up   | Serine carboxypeptidase-like 19                                     |         |
| Pc_TC077211 | -1.24 | 0.07  |      |  | -1.94 | 0.02      | Down | -1.28 | 0.25      |      | -0.28 | 0.72  |      | Expressed protein                                                   |         |
| Pc_TC077215 | 0.54  | 0.33  |      |  | 0.69  | 0.29      |      | -3.69 | 0         | Down | -2.07 | 0.01  | Down | Expressed protein                                                   |         |
| Pc_TC077223 | -0.51 | 0.89  |      |  | 3.4   | 0         | Up   | -0.5  | 0.89      |      | -0.64 | 0.81  |      | Expressed protein                                                   |         |
| Pc_TC077224 | -1.08 | 0.2   |      |  | -0.43 | 0.65      |      | -4.11 | 0.01      | Down | -2.99 | 0.01  | Down | Expressed protein                                                   |         |
| Pc_TC077226 | 1.29  | 0.02  | Up   |  | 0     | 1.28E-007 |      | 0.66  | 0.54      |      | -0.73 | 0.35  |      | Glutathione S-transferase                                           |         |
| Pc_TC077228 | -0.84 | 0.27  |      |  | -0.13 | 0.89      |      | 2.97  | 0.01      | Up   | 1.65  | 0.02  | Up   | Expressed protein                                                   |         |
| Pc_TC077236 | -0.13 | 0.8   |      |  | 0.29  | 0.63      |      | -2.02 | 0.06      |      | -1.48 | 0.03  | Down | Expressed protein                                                   |         |
| Pc_TC077246 | 1.36  | 0.03  | Up   |  | 0.94  | 0.22      |      | -1.13 | 0.35      |      | 0.69  | 0.38  |      | Uncharacterized protein                                             |         |
| Pc_TC077249 | 5.08  | 0     | Up   |  | 4.52  | 0.01      | Up   | 4.03  | 0.07      |      | 4.58  | 0.01  | Up   | Expressed protein                                                   |         |
| Pc_TC077252 | -0.41 | 0.45  |      |  | -1.17 | 0.08      |      | 2.06  | 0.03      | Up   | 1.11  | 0.08  |      | Putative disease resistance protein                                 |         |
| Pc_TC077262 | 0.81  | 0.09  |      |  | 0.62  | 0.29      |      | -3.48 | 0         | Down | -1.91 | 0.01  | Down | Putative uncharacterized protein OSJNBb0026F09.30                   |         |



|             |       |       |      |       |           |      |       |           |      |       |       |      |                                                                          |
|-------------|-------|-------|------|-------|-----------|------|-------|-----------|------|-------|-------|------|--------------------------------------------------------------------------|
| Pc_TC077263 | -0.19 | 0.67  |      | 0.42  | 0.43      |      | -3.25 | 0         | Down | -2.66 | ##### | Down | Putative uncharacterized protein OSJNBb0026F09.30                        |
| Pc_TC077264 | 0.34  | 0.37  |      | 0.33  | 0.49      |      | -2.85 | 0         | Down | -2.09 | 0     | Down | Putative uncharacterized protein OSJNBb0026F09.30                        |
| Pc_TC077267 | -3.17 | 0.04  | Down | -0.19 | 0.92      |      | -0.04 | 1         |      | 0.63  | 0.56  |      | Expressed protein                                                        |
| Pc_TC077272 | 2.11  | ##### | Up   | 0     | 1.11E-010 |      | 1.26  | 0.21      |      | -0.04 | 0.96  |      | Thioredoxin superfamily protein                                          |
| Pc_TC077273 | 2.4   | 0.4   |      | 5.45  | 0         | Up   | 1.83  | 0.66      |      | -0.37 | 1     |      | Expressed protein                                                        |
| Pc_TC077274 | 0.08  | 1     |      | 2.46  | 0.03      | Up   | -1.72 | 0.47      |      | -1.18 | 0.57  |      | Expressed protein                                                        |
| Pc_TC077286 | -0.12 | 0.86  |      | 0.33  | 0.65      |      | -5.14 | 0         | Down | -1.19 | 0.14  |      | Expressed protein                                                        |
| Pc_TC077291 | 1.31  | 0     | Up   | 0     | 1.66E-017 |      | 1.05  | 0.25      |      | -0.39 | 0.52  |      | ribosomal protein L5 B                                                   |
| Pc_TC077299 | 0.34  | 0.48  |      | 0.5   | 0.39      |      | -3.58 | 0         | Down | -2.08 | 0     | Down | Expressed protein                                                        |
| Pc_TC077308 | 0.97  | 0.04  |      | -0.66 | 0.31      |      | 1.31  | 0.18      |      | 2.13  | 0     | Up   | Expressed protein                                                        |
| Pc_TC077311 | 2.29  | 0     | Up   | 2.38  | 0.01      | Up   | 0.6   | 0.66      |      | 2.1   | 0.02  | Up   | Expressed protein                                                        |
| Pc_TC077312 | -0.14 | 0.88  |      | -0.78 | 0.4       |      | 0.35  | 0.77      |      | -2.21 | 0.03  | Down | Expressed protein                                                        |
| Pc_TC077333 | 2.97  | 0     | Up   | 0     | 0.15      |      | 1.74  | 0.26      |      | -3.18 | 0.19  |      | Expressed protein                                                        |
| Pc_TC077337 | 0     | ##### |      | -5.28 | 1.64E-005 | Down | -4.84 | 0         | Down | 0     | ##### |      | Expressed protein                                                        |
| Pc_TC077356 | 1.21  | 0.03  | Up   | 0.65  | 0.33      |      | -0.49 | 0.65      |      | 0.83  | 0.23  |      | Expressed protein                                                        |
| Pc_TC077365 | 0.62  | 0.25  |      | 0.61  | 0.34      |      | -2.39 | 0.03      | Down | -0.04 | 0.96  |      | Expressed protein                                                        |
| Pc_TC077395 | 1.06  | 0.05  |      | 0.35  | 0.62      |      | -0.51 | 0.64      |      | 1.57  | 0.02  | Up   | Expressed protein                                                        |
| Pc_TC077397 | 1.92  | 0.09  |      | 2.38  | 0.04      | Up   | 1.34  | 0.42      |      | 0.28  | 0.94  |      | Expressed protein                                                        |
| Pc_TC077398 | -0.64 | 0.56  |      | 0.23  | 0.86      |      | -0.02 | 1         |      | -3.31 | 0.02  | Down | Expressed protein                                                        |
| Pc_TC077413 | -1.06 | 0.02  | Down | -0.6  | 0.29      |      | 2.86  | 0         | Up   | 1.88  | 0     | Up   | desulfo-glucosinolate sulfotransferase 18                                |
| Pc_TC077414 | 0.66  | 0.81  |      | 0.38  | 0.97      |      | 3.55  | 0.02      | Up   | 2.95  | 0.02  | Up   | P-loop containing nucleoside triphosphate hydrolases superfamily protein |
| Pc_TC077416 | -0.55 | 0.44  |      | -1.02 | 0.23      |      | -1.99 | 0.1       |      | -1.92 | 0.03  | Down | Expressed protein                                                        |
| Pc_TC077417 | -3.45 | 0.02  | Down | 0     | 0         |      | -0.85 | 0.56      |      | -4.9  | 0     | Down | Expressed protein                                                        |
| Pc_TC077420 | -3.38 | 0.01  | Down | -0.59 | 0.58      |      | -0.84 | 0.53      |      | -1.03 | 0.32  |      | Expressed protein                                                        |
| Pc_TC077430 | -0.63 | 0.21  |      | -1.87 | 0         | Down | 2.33  | 0.01      | Up   | 1.14  | 0.06  |      | Uncharacterized protein                                                  |
| Pc_TC077431 | 2.93  | ##### | Up   | 0     | 0         |      | 1.41  | 0.23      |      | 0.19  | 0.86  |      | Expressed protein                                                        |
| Pc_TC077435 | 0.17  | 0.8   |      | 0.68  | 0.34      |      | -1.87 | 0.11      |      | -2.59 | 0     | Down | Expressed protein                                                        |
| Pc_TC077440 | 0.52  | 0.22  |      | 0.41  | 0.44      |      | -2.33 | 0.02      | Down | 0.65  | 0.26  |      | Putative uncharacterized protein                                         |
| Pc_TC077441 | 1.49  | 0     | Up   | 0     | 2.25E-011 |      | 1.09  | 0.27      |      | -0.51 | 0.46  |      | Ribosomal protein S8 family protein                                      |
| Pc_TC077449 | 0.5   | 0.28  |      | 0.18  | 0.76      |      | -3.59 | 0         | Down | -2.24 | 0     | Down | Expressed protein                                                        |
| Pc_TC077450 | 0.57  | 0.22  |      | 1.08  | 0.05      |      | -2.16 | 0.04      | Down | -0.9  | 0.17  |      | Expressed protein                                                        |
| Pc_TC077457 | 0.48  | 0.41  |      | 0.91  | 0.17      |      | -2    | 0.08      |      | -2.13 | 0.01  | Down | Expressed protein                                                        |
| Pc_TC077463 | -0.24 | 0.67  |      | -0.12 | 0.86      |      | -1.58 | 0.14      |      | -1.73 | 0.02  | Down | Expressed protein                                                        |
| Pc_TC077467 | -1.26 | 0.08  |      | -1.53 | 0.08      |      | -1.41 | 0.23      |      | -1.91 | 0.03  | Down | Expressed protein                                                        |
| Pc_TC077468 | 0.89  | 0.2   |      | 2.07  | 0.01      | Up   | -1.56 | 0.23      |      | -0.99 | 0.29  |      | Expressed protein                                                        |
| Pc_TC077469 | 0.08  | 0.98  |      | 0.83  | 0.38      |      | -4.25 | 0.02      | Down | -2.54 | 0.04  | Down | Expressed protein                                                        |
| Pc_TC077478 | 1     | 0.17  |      | 0.33  | 0.73      |      | -4.78 | 0.01      | Down | -1.08 | 0.27  |      | Uncharacterized protein                                                  |
| Pc_TC077483 | -1.54 | 0.02  | Down | -1.92 | 0.02      | Down | 1.22  | 0.24      |      | -0.48 | 0.53  |      | Uncharacterized protein (Fragment)                                       |
| Pc_TC077484 | 0.25  | 0.53  |      | 0.23  | 0.64      |      | -3.19 | 0         | Down | -1.64 | 0.01  | Down | Expressed protein                                                        |
| Pc_TC077485 | 0.23  | 0.57  |      | -0.17 | 0.75      |      | -1.87 | 0.06      |      | -1.72 | 0.01  | Down | Expressed protein                                                        |
| Pc_TC077494 | 0.64  | 0.04  |      | -0.23 | 0.57      |      | 0.53  | 0.53      |      | 1.08  | 0.03  | Up   | Expressed protein                                                        |
| Pc_TC077506 | -0.79 | 0.19  |      | -1.67 | 0.03      | Down | -1.32 | 0.22      |      | -1.21 | 0.1   |      | U5 small nuclear ribonucleoprotein helicase                              |
| Pc_TC077520 | -3.24 | 0.03  | Down | -1.68 | 0.22      |      | 2.96  | 0.01      | Up   | 1.41  | 0.13  |      | Expressed protein                                                        |
| Pc_TC077528 | 0.03  | 0.98  |      | 1.26  | 0.06      |      | -2.57 | 0.03      | Down | -1.82 | 0.02  | Down | Expressed protein                                                        |
| Pc_TC077533 | -0.24 | 0.87  |      | -1.26 | 0.34      |      | -3.82 | 0.04      | Down | -0.11 | 0.96  |      | Expressed protein                                                        |
| Pc_TC077544 | 0.25  | 0.76  |      | 1.66  | 0.03      | Up   | -5.08 | 0         | Down | -2.15 | 0.03  | Down | Expressed protein                                                        |
| Pc_TC077555 | 0.51  | 0.37  |      | 0.59  | 0.38      |      | -3.27 | 0.01      | Down | -1.34 | 0.08  |      | Expressed protein                                                        |
| Pc_TC077562 | 0.22  | 0.62  |      | 0.28  | 0.61      |      | -9.57 | 2.18E-009 | Down | -3.38 | ##### | Down | Expressed protein                                                        |
| Pc_TC077566 | 3.22  | 0     | Up   | 1.8   | 0.19      |      | 1.17  | 0.52      |      | -0.96 | 0.68  |      | Expressed protein                                                        |
| Pc_TC077567 | -0.05 | 0.93  |      | -0.77 | 0.25      |      | -3.65 | 0         | Down | -1.36 | 0.05  |      | Expressed protein                                                        |
| Pc_TC077579 | 0.48  | 0.48  |      | 1.06  | 0.16      |      | -4.45 | 0         | Down | -3.33 | 0     | Down | Expressed protein                                                        |
| Pc_TC077583 | 0.41  | 0.42  |      | 1.35  | 0.02      | Up   | -4.02 | 0         | Down | -0.74 | 0.28  |      | PWWP domain containing protein,expressed                                 |
| Pc_TC077592 | 0.39  | 0.48  |      | 0.6   | 0.35      |      | -2.68 | 0.02      | Down | -2.16 | 0     | Down | Expressed protein                                                        |
| Pc_TC077593 | 1.12  | 0.03  | Up   | 1.02  | 0.1       |      | -2.34 | 0.04      | Down | 0.18  | 0.8   |      | Expressed protein                                                        |
| Pc_TC077607 | -0.77 | 0.18  |      | -0.63 | 0.35      |      | 1.98  | 0.04      | Up   | 0.78  | 0.24  |      | Expressed protein                                                        |
| Pc_TC077619 | -0.52 | 0.42  |      | -0.05 | 0.96      |      | -0.68 | 0.53      |      | -1.73 | 0.03  | Down | DEA(D/H)-box RNA helicase family protein                                 |
| Pc_TC077648 | -0.8  | 0.13  |      | -1.83 | 0.01      | Down | 1.46  | 0.13      |      | 0.48  | 0.44  |      | Uncharacterized protein                                                  |
| Pc_TC077649 | 0.11  | 0.85  |      | 0.66  | 0.29      |      | -2.17 | 0.05      | Down | -1.13 | 0.11  |      | Uncharacterized protein                                                  |
| Pc_TC077650 | -3.34 | 0.01  | Down | 0.01  | 1         |      | -0.07 | 0.98      |      | -3.79 | 0     | Down | Expressed protein                                                        |
| Pc_TC077651 | 0.21  | 0.67  |      | 1.36  | 0.01      | Up   | -3.48 | 0         | Down | -2.27 | 0     | Down | Expressed protein                                                        |
| Pc_TC077656 | -2.33 | ##### | Down | -2.91 | 8.69E-008 | Down | -1.8  | 0.05      | Down | -0.31 | 0.56  |      | unknown protein                                                          |
| Pc_TC077658 | -1.05 | 0.01  | Down | 0.4   | 0.38      |      | -0.67 | 0.45      |      | -0.43 | 0.43  |      | P-loop containing nucleoside triphosphate hydrolases superfamily protein |

|             |       |       |      |  |       |           |      |   |           |           |      |       |       |      |                                                          |
|-------------|-------|-------|------|--|-------|-----------|------|---|-----------|-----------|------|-------|-------|------|----------------------------------------------------------|
| Pc_TC077662 | 0.86  | 0.11  |      |  | 0.76  | 0.24      |      |   | -2.5      | 0.03      | Down | -1.78 | 0.02  | Down | Expressed protein                                        |
| Pc_TC077674 | 0.45  | 0.44  |      |  | 0.5   | 0.47      |      |   | -2.52     | 0.03      | Down | 0.44  | 0.53  |      | Putative uncharacterized protein                         |
| Pc_TC077675 | 0.21  | 0.69  |      |  | 0.77  | 0.21      |      | 0 | 1.71E-007 |           |      | -4.46 | ##### | Down | Expressed protein                                        |
| Pc_TC077683 | 0.42  | 0.48  |      |  | 0.86  | 0.2       |      |   | -2.71     | 0.02      | Down | 0.71  | 0.31  |      | Expressed protein                                        |
| Pc_TC077685 | 2.75  | ##### | Up   |  | 0     | 0         |      |   | 2.49      | 0.03      | Up   | 0.85  | 0.31  |      | Expressed protein                                        |
| Pc_TC077689 | 1.76  | 0.04  | Up   |  | -0.15 | 0.97      |      |   | -1.6      | 0.35      |      | 1.04  | 0.33  |      | Uncharacterized protein                                  |
| Pc_TC077702 | -1.36 | 0.01  | Down |  | -2.39 | 0         | Down |   | 0.5       | 0.6       |      | -0.87 | 0.18  |      | cysteine-rich RLK (RECEPTOR-like protein kinase) 8       |
| Pc_TC077729 | 0.19  | 0.71  |      |  | 0.48  | 0.42      |      |   | -2.63     | 0.02      | Down | -1.64 | 0.02  | Down | Expressed protein                                        |
| Pc_TC077730 | 0.45  | 0.45  |      |  | 0.28  | 0.7       |      |   | -3.53     | 0.01      | Down | -1.61 | 0.04  | Down | Expressed protein                                        |
| Pc_TC077733 | 1.55  | ##### | Up   |  | 0     | 3.92E-025 |      |   | 1.33      | 0.13      |      | 0.91  | 0.09  |      | Expressed protein                                        |
| Pc_TC077737 | 0.08  | 0.9   |      |  | 0.28  | 0.68      |      |   | -2.6      | 0.02      | Down | -1.9  | 0.01  | Down | Expressed protein                                        |
| Pc_TC077740 | 0.08  | 0.94  |      |  | -0.4  | 0.66      |      |   | 2.95      | 0.01      | Up   | 0.82  | 0.29  |      | Expressed protein                                        |
| Pc_TC077741 | 0.89  | 0.52  |      |  | 0.96  | 0.51      |      |   | 3.46      | 0.01      | Up   | 1.83  | 0.11  |      | Expressed protein                                        |
| Pc_TC077744 | 0.26  | 0.7   |      |  | 0.59  | 0.43      |      |   | -3.03     | 0.02      | Down | -1.76 | 0.04  | Down | Expressed protein                                        |
| Pc_TC077753 | -1.61 | 0.07  |      |  | -1.26 | 0.2       |      |   | -0.21     | 0.88      |      | -2.17 | 0.03  | Down | Uncharacterized protein                                  |
| Pc_TC077762 | -0.16 | 0.85  |      |  | 0.24  | 0.78      |      |   | -1.68     | 0.18      |      | -2.09 | 0.03  | Down | Expressed protein                                        |
| Pc_TC077765 | -0.29 | 0.7   |      |  | -0.03 | 0.99      |      |   | -2.98     | 0.02      | Down | -1.23 | 0.15  |      | Expressed protein                                        |
| Pc_TC077772 | 0.67  | 0.12  |      |  | 0.78  | 0.14      |      |   | -3.83     | 0         | Down | -1.12 | 0.08  |      | Expressed protein                                        |
| Pc_TC077775 | -0.28 | 0.83  |      |  | -0.47 | 0.71      |      |   | -1.85     | 0.23      |      | -2.58 | 0.05  | Down | Uncharacterized protein                                  |
| Pc_TC077783 | 1.77  | 0.05  |      |  | 1.06  | 0.36      |      |   | 2.69      | 0.03      | Up   | 2.01  | 0.04  | Up   | Expressed protein                                        |
| Pc_TC077784 | -2.08 | 0.02  | Down |  | -1.41 | 0.13      |      |   | -0.52     | 0.67      |      | -1.06 | 0.23  |      | Expressed protein                                        |
| Pc_TC077796 | 1.93  | 0     | Up   |  | 0     | 4.69E-005 |      |   | 1.94      | 0.08      |      | 0.33  | 0.71  |      | Expressed protein                                        |
| Pc_TC077798 | -0.23 | 0.73  |      |  | -2.86 | 0         | Down |   | 0.25      | 0.83      |      | 0.49  | 0.51  |      | Expressed protein                                        |
| Pc_TC077802 | -0.01 | 1     |      |  | 0.01  | 1         |      |   | -4.45     | 0         | Down | -3.16 | 0     | Down | Expressed protein                                        |
| Pc_TC077813 | 0.03  | 0.96  |      |  | 1.8   | 0         | Up   |   | -2.1      | 0.05      | Down | -1.59 | 0.02  | Down | Expressed protein                                        |
| Pc_TC077819 | 0.04  | 0.95  |      |  | 0.31  | 0.65      |      |   | -3.12     | 0.01      | Down | -3.22 | 0     | Down | Expressed protein                                        |
| Pc_TC077835 | -0.12 | 0.77  |      |  | 0.17  | 0.74      |      |   | -6.64     | 1.25E-007 | Down | -4.44 | ##### | Down | putative,CACTA,En/Spm sub-class                          |
| Pc_TC077839 | -1.67 | 0.04  | Down |  | -0.69 | 0.42      |      |   | -0.48     | 0.69      |      | -0.92 | 0.28  |      | putative,CACTA,En/Spm sub-class                          |
| Pc_TC077840 | 0.42  | 0.6   |      |  | 0.63  | 0.48      |      |   | 1.52      | 0.19      |      | 1.63  | 0.04  | Up   | putative,CACTA,En/Spm sub-class                          |
| Pc_TC077841 | -0.08 | 0.89  |      |  | -1.76 | 0.01      | Down |   | 0.4       | 0.69      |      | -0.48 | 0.49  |      | Expressed protein                                        |
| Pc_TC077852 | -0.44 | 0.58  |      |  | 0     | 2.30E-005 |      |   | -1.58     | 0.21      |      | -3.1  | 0     | Down | Expressed protein                                        |
| Pc_TC077863 | 1.12  | 0.22  |      |  | 2.1   | 0.02      | Up   |   | 1.25      | 0.35      |      | 1.12  | 0.27  |      | Uncharacterized protein                                  |
| Pc_TC077867 | 0     | 0     |      |  | 0     | 0         |      |   | -4.25     | 0.02      | Down | 0     | 0     |      | Major facilitator superfamily protein                    |
| Pc_TC077905 | 0.83  | 0.05  |      |  | 0.73  | 0.17      |      |   | -2.61     | 0.01      | Down | -0.32 | 0.6   |      | Expressed protein                                        |
| Pc_TC077920 | 0.04  | 1     |      |  | -0.8  | 0.43      |      |   | -2.16     | 0.12      |      | -3.04 | 0.01  | Down | Os05g0108500 protein                                     |
| Pc_TC077929 | 0.57  | 0.43  |      |  | 1.33  | 0.08      |      |   | -2.11     | 0.11      |      | -2.27 | 0.02  | Down | Expressed protein                                        |
| Pc_TC077930 | -0.56 | 0.45  |      |  | -0.72 | 0.4       |      |   | 2.34      | 0.03      | Up   | 1.48  | 0.04  | Up   | Expressed protein                                        |
| Pc_TC077934 | 0.39  | 0.3   |      |  | 0.73  | 0.13      |      |   | -1.99     | 0.04      | Down | -1.26 | 0.03  | Down | Expressed protein                                        |
| Pc_TC077935 | 0.46  | 0.77  |      |  | -0.94 | 0.62      |      |   | 0.7       | 0.68      |      | 2.28  | 0.03  | Up   | Expressed protein                                        |
| Pc_TC077939 | 0.46  | 0.44  |      |  | 0.61  | 0.37      |      |   | -2.76     | 0.02      | Down | -0.95 | 0.21  |      | Expressed protein                                        |
| Pc_TC077940 | 0.4   | 0.34  |      |  | 1.29  | 0.01      | Up   |   | -2.58     | 0.01      | Down | -0.36 | 0.55  |      | Expressed protein                                        |
| Pc_TC077946 | 0     | 0     |      |  | 0     | 0.01      |      |   | -3.82     | 0.04      | Down | 0     | 0     |      | Expressed protein                                        |
| Pc_TC077965 | -2.07 | 0.05  |      |  | 0.53  | 0.58      |      |   | -1.36     | 0.33      |      | -3.33 | 0.01  | Down | Expressed protein                                        |
| Pc_TC077972 | 0.53  | 0.54  |      |  | -0.79 | 0.49      |      |   | 0.48      | 0.72      |      | 1.87  | 0.03  | Up   | Putative uncharacterized protein                         |
| Pc_TC077979 | -0.27 | 0.55  |      |  | -0.09 | 0.87      |      |   | -1.37     | 0.16      |      | -1.4  | 0.03  | Down | Expressed protein                                        |
| Pc_TC077990 | 0.54  | 0.29  |      |  | -0.68 | 0.31      |      |   | 0.08      | 0.94      |      | 1.56  | 0.01  | Up   | Uncharacterized protein                                  |
| Pc_TC078007 | 1.13  | 0.04  | Up   |  | 0.77  | 0.25      |      |   | 0.39      | 0.72      |      | 0.39  | 0.58  |      | Expressed protein                                        |
| Pc_TC078009 | -0.92 | 0.73  |      |  | -0.53 | 0.89      |      |   | 3.2       | 0.02      | Up   | 1.43  | 0.3   |      | Expressed protein                                        |
| Pc_TC078032 | 0.08  | 0.93  |      |  | 1.88  | 0.01      | Up   |   | -4.22     | 0         | Down | -1.25 | 0.15  |      | Expressed protein                                        |
| Pc_TC078054 | -1.84 | 0.02  | Down |  | -2.11 | 0.02      | Down |   | 1.61      | 0.13      |      | 0.31  | 0.7   |      | Expressed protein                                        |
| Pc_TC078058 | 0.79  | 0.17  |      |  | 0.77  | 0.26      |      |   | -3.4      | 0.01      | Down | -0.77 | 0.31  |      | Expressed protein                                        |
| Pc_TC078059 | -1.27 | 0.04  | Down |  | -0.43 | 0.54      |      |   | -5.14     | 0         | Down | -2.21 | 0     | Down | Expressed protein                                        |
| Pc_TC078064 | 0.64  | 0.48  |      |  | -0.38 | 0.77      |      |   | -0.7      | 0.64      |      | -2.58 | 0.05  | Down | Expressed protein                                        |
| Pc_TC078067 | 0.78  | 0.22  |      |  | 0.29  | 0.73      |      |   | -3.63     | 0.01      | Down | -2.18 | 0.02  | Down | Putative BRCA1 interacting protein C-terminal helicase 1 |
| Pc_TC078081 | 0.75  | 0.1   |      |  | 1.02  | 0.07      |      |   | -2.25     | 0.03      | Down | -0.14 | 0.83  |      | Expressed protein                                        |
| Pc_TC078083 | -0.8  | 0.15  |      |  | -1.6  | 0.02      | Down |   | 0.85      | 0.39      |      | 0     | 1     |      | Expressed protein                                        |
| Pc_TC078086 | 0.29  | 0.44  |      |  | 0.43  | 0.37      |      |   | -2.73     | 0.01      | Down | -1.17 | 0.04  | Down | Expressed protein                                        |
| Pc_TC078091 | -0.45 | 0.48  |      |  | 0.07  | 0.93      |      |   | -3.56     | 0         | Down | -3.44 | 0     | Down | Expressed protein                                        |
| Pc_TC078093 | 0.66  | 0.32  |      |  | 0.76  | 0.32      |      |   | -1.76     | 0.15      |      | 1.75  | 0.02  | Up   | Expressed protein                                        |
| Pc_TC078095 | 0.2   | 0.74  |      |  | 0.52  | 0.44      |      |   | -3.28     | 0.01      | Down | -1.9  | 0.02  | Down | Expressed protein                                        |
| Pc_TC078109 | -3.04 | 0.02  | Down |  | -0.74 | 0.53      |      |   | 0.89      | 0.48      |      | 0.42  | 0.68  |      | N2,N2-dimethylguanosine tRNA methyltransferase           |
| Pc_TC078126 | 0.91  | 0.47  |      |  | 0.21  | 0.96      |      |   | 2.09      | 0.14      |      | 2.34  | 0.03  | Up   | Expressed protein                                        |

|             |       |       |      |       |           |      |       |           |      |       |       |      |                                                                            |
|-------------|-------|-------|------|-------|-----------|------|-------|-----------|------|-------|-------|------|----------------------------------------------------------------------------|
| Pc_TC078144 | 1.74  | 0     | Up   | 0     | 6.39E-008 |      | 1.66  | 0.11      |      | 0.52  | 0.47  |      | P-loop nucleoside triphosphate hydrolases superfamily protein              |
| Pc_TC078177 | 0.03  | 1     |      | 0.95  | 0.29      |      | -0.96 | 0.49      |      | -3.65 | 0.01  | Down | unknown protein                                                            |
| Pc_TC078189 | -2.34 | 0.11  |      | -1.62 | 0.28      |      | 0.09  | 0.99      |      | -3.37 | 0.04  | Down | Expressed protein                                                          |
| Pc_TC078193 | -0.32 | 0.35  |      | -1.1  | 0.02      | Down | 1.37  | 0.1       |      | 0.52  | 0.31  |      | Expressed protein                                                          |
| Pc_TC078198 | 0.26  | 0.66  |      | 1.26  | 0.05      | Up   | -2.51 | 0.03      | Down | -1.17 | 0.12  |      | Expressed protein                                                          |
| Pc_TC078208 | 1.93  | ##### | Up   | 0     | 7.75E-011 |      | 1.3   | 0.19      |      | -0.43 | 0.54  |      | breast basic conserved 1                                                   |
| Pc_TC078213 | 0.28  | 0.62  |      | 0.28  | 0.68      |      | -5.16 | 0         | Down | -2.67 | 0     | Down | Expressed protein                                                          |
| Pc_TC078214 | -0.22 | 0.68  |      | -0.18 | 0.78      |      | -2.39 | 0.03      | Down | -2.09 | 0     | Down | Expressed protein                                                          |
| Pc_TC078218 | -1.29 | 0.09  |      | -0.96 | 0.27      |      | -2.66 | 0.04      | Down | -1.31 | 0.13  |      | DNA/RNA polymerases superfamily protein                                    |
| Pc_TC078228 | 0.44  | 0.49  |      | 0.31  | 0.68      |      | -4.96 | 0         | Down | -1.66 | 0.05  | Down | Expressed protein                                                          |
| Pc_TC078230 | -0.43 | 0.45  |      | 0.28  | 0.66      |      | -2.67 | 0.02      | Down | -2.04 | 0.01  | Down | Expressed protein                                                          |
| Pc_TC078233 | 0.5   | 0.36  |      | 1.25  | 0.04      | Up   | -1.76 | 0.11      |      | -1.18 | 0.11  |      | Expressed protein                                                          |
| Pc_TC078236 | -2.13 | 0.03  | Down | -1.34 | 0.2       |      | 0.02  | 1         |      | 0.14  | 0.9   |      | Expressed protein                                                          |
| Pc_TC078245 | 0.44  | 0.35  |      | 1.73  | 0         | Up   | -3.66 | 0         | Down | -1.52 | 0.02  | Down | Expressed protein                                                          |
| Pc_TC078267 | 0.78  | 0.28  |      | 1.29  | 0.1       |      | -1.34 | 0.3       |      | -3.87 | 0     | Down | Expressed protein                                                          |
| Pc_TC078273 | 0.25  | 0.73  |      | 0.31  | 0.7       |      | -2.69 | 0.04      | Down | -1.24 | 0.14  |      | Expressed protein                                                          |
| Pc_TC078278 | 0.21  | 0.69  |      | 0.32  | 0.6       |      | -2.65 | 0.02      | Down | -2.13 | 0     | Down | Expressed protein                                                          |
| Pc_TC078285 | -1.72 | 0.04  | Down | -0.65 | 0.46      |      | 1.1   | 0.32      |      | 0.06  | 0.96  |      | Expressed protein                                                          |
| Pc_TC078289 | 0.23  | 0.7   |      | -0.69 | 0.35      |      | -1.35 | 0.22      |      | -1.92 | 0.02  | Down | Alkaline-phosphatase-like family protein                                   |
| Pc_TC078312 | 1.66  | 0.72  |      | 3.23  | 0.18      |      | 4.41  | 0.03      | Up   | 4.58  | 0.01  | Up   | Expressed protein                                                          |
| Pc_TC078347 | -3.73 | 0.05  | Down | -0.05 | 1         |      | 0.34  | 0.85      |      | 0.07  | 1     |      | Os04g0626700 protein (Fragment)                                            |
| Pc_TC078391 | 0.67  | 0.25  |      | 0.99  | 0.14      |      | 0     | 4.39E-006 |      | -2.39 | 0     | Down | DNA binding protein-like                                                   |
| Pc_TC078398 | -1.29 | 0.03  | Down | -0.5  | 0.47      |      | -0.56 | 0.6       |      | -0.67 | 0.34  |      | putative,Mariner sub-class                                                 |
| Pc_TC078406 | -1.46 | 0.05  | Down | -0.75 | 0.36      |      | 0.23  | 0.84      |      | 0.36  | 0.64  |      | Expressed protein                                                          |
| Pc_TC078410 | -4.28 | 0     | Down | -1.71 | 0.1       |      | -3.05 | 0.04      | Down | -1.64 | 0.1   |      | Expressed protein                                                          |
| Pc_TC078426 | 0.62  | 0.25  |      | 0.25  | 0.71      |      | 0.47  | 0.65      |      | 1.4   | 0.03  | Up   | Expressed protein                                                          |
| Pc_TC078462 | -1.44 | 0.07  |      | -2.53 | 0.01      | Down | -4.4  | 0         | Down | -0.92 | 0.29  |      | Expressed protein                                                          |
| Pc_TC078463 | 1.28  | 0.05  | Up   | 1.4   | 0.06      |      | 1.09  | 0.33      |      | 1.73  | 0.02  | Up   | Expressed protein                                                          |
| Pc_TC078470 | 0.5   | 0.35  |      | 1.11  | 0.07      |      | -2.31 | 0.04      | Down | -0.95 | 0.18  |      | Expressed protein                                                          |
| Pc_TC078479 | -0.39 | 0.5   |      | -1.55 | 0.03      | Down | 1.07  | 0.29      |      | 0.32  | 0.64  |      | MuDR family transposase                                                    |
| Pc_TC078490 | 0.35  | 0.38  |      | 0.7   | 0.16      |      | -2.97 | 0         | Down | -1.34 | 0.03  | Down | Expressed protein                                                          |
| Pc_TC078491 | 0.32  | 0.3   |      | 0.43  | 0.28      |      | -2.74 | 0         | Down | -1.33 | 0.01  | Down | Uncharacterized protein                                                    |
| Pc_TC078492 | -1.28 | 0.03  | Down | 0.45  | 0.48      |      | 0.34  | 0.74      |      | -0.29 | 0.68  |      | Expressed protein                                                          |
| Pc_TC078498 | -0.45 | 0.51  |      | 0.63  | 0.38      |      | -1.67 | 0.15      |      | -2.42 | 0.01  | Down | Expressed protein                                                          |
| Pc_TC078506 | 0.63  | 0.43  |      | 0.84  | 0.35      |      | -2.91 | 0.06      |      | -3.37 | 0.01  | Down | Putative uncharacterized protein                                           |
| Pc_TC078509 | 1.59  | 0.01  | Up   | 0     | 2.85E-006 |      | 1.07  | 0.32      |      | -2.09 | 0.02  | Down | Pyridoxamine 5'-phosphate oxidase family protein                           |
| Pc_TC078512 | -1.46 | 0.05  | Down | -1.53 | 0.07      |      | 0.16  | 0.9       |      | -0.32 | 0.69  |      | RNA-directed DNA polymerase (reverse transcriptase)-related family protein |
| Pc_TC078514 | 0.66  | 0.5   |      | 2     | 0.03      | Up   | -0.08 | 0.99      |      | 0.5   | 0.66  |      | Expressed protein                                                          |
| Pc_TC078529 | -3.14 | ##### | Down | -3.37 | 8.38E-006 | Down | -7.63 | 4.35E-007 | Down | -1.04 | 0.12  |      | Expressed protein                                                          |
| Pc_TC078537 | -0.06 | 0.84  |      | -0.75 | 0.05      |      | 1.75  | 0.04      | Up   | 1.05  | 0.03  | Up   | Ribulose bisphosphate carboxylase (small chain) family protein             |
| Pc_TC078538 | 0.02  | 0.96  |      | -0.4  | 0.31      |      | 1.74  | 0.04      | Up   | 1.12  | 0.02  | Up   | Ribulose bisphosphate carboxylase (small chain) family protein             |
| Pc_TC078540 | 2.97  | 0.01  | Up   | 2.54  | 0.05      | Up   | 1.27  | 0.5       |      | 1.63  | 0.26  |      | Expressed protein                                                          |
| Pc_TC078541 | -2.07 | 0.05  |      | -3.9  | 0.01      | Down | -0.5  | 0.72      |      | -3.01 | 0.01  | Down | Expressed protein                                                          |
| Pc_TC078542 | -0.14 | 0.86  |      | 0.04  | 0.98      |      | -2.76 | 0.03      | Down | -1.69 | 0.05  |      | Expressed protein                                                          |
| Pc_TC078544 | 0.32  | 0.52  |      | 0.59  | 0.32      |      | -2.57 | 0.02      | Down | -0.36 | 0.58  |      | Expressed protein                                                          |
| Pc_TC078545 | 0.43  | 0.48  |      | 1.6   | 0.01      | Up   | -3.28 | 0.01      | Down | -1.2  | 0.12  |      | Expressed protein                                                          |
| Pc_TC078560 | 1.16  | 0.02  | Up   | 0.33  | 0.62      |      | -0.29 | 0.78      |      | 1.09  | 0.1   |      | Expressed protein                                                          |
| Pc_TC078562 | -0.18 | 0.79  |      | 0.69  | 0.33      |      | -1.71 | 0.14      |      | -1.84 | 0.03  | Down | Expressed protein                                                          |
| Pc_TC078567 | 0.82  | 0.47  |      | 1.17  | 0.31      |      | 3.76  | 0         | Up   | 2.55  | 0.01  | Up   | Expressed protein                                                          |
| Pc_TC078569 | -2.92 | 0     | Down | -0.44 | 0.64      |      | -0.99 | 0.43      |      | 0.17  | 0.86  |      | Uncharacterized protein                                                    |
| Pc_TC078572 | 2.46  | 0.04  | Up   | 0     | 0.27      |      | 1.99  | 0.23      |      | 0.47  | 0.87  |      | Expressed protein                                                          |
| Pc_TC078578 | -0.13 | 0.78  |      | -0.61 | 0.29      |      | 1.89  | 0.04      | Up   | 0.82  | 0.16  |      | Uncharacterized protein                                                    |
| Pc_TC078579 | 0.54  | 0.49  |      | 1.6   | 0.05      | Up   | -2.01 | 0.15      |      | -3    | 0.01  | Down | Expressed protein                                                          |
| Pc_TC078581 | -0.22 | 0.79  |      | 0     | 1         |      | -2.77 | 0.04      | Down | -0.64 | 0.47  |      | Expressed protein                                                          |
| Pc_TC078592 | 2.4   | 0.02  | Up   | 1.95  | 0.12      |      | 1.34  | 0.42      |      | 0.91  | 0.54  |      | Expressed protein                                                          |
| Pc_TC078593 | 2.26  | 0.01  | Up   | -1.64 | 0.33      |      | 1.09  | 0.45      |      | 1.65  | 0.11  |      | Expressed protein                                                          |
| Pc_TC078596 | -1.33 | 0.05  | Down | -1.72 | 0.03      | Down | -0.52 | 0.63      |      | -0.48 | 0.53  |      | Uncharacterized protein                                                    |
| Pc_TC078625 | -2.1  | 0     | Down | -2.42 | 0         | Down | -4.53 | 0         | Down | -4.33 | ##### | Down | photosystem I light harvesting complex gene 1                              |
| Pc_TC078633 | -0.65 | 0.2   |      | -1.34 | 0.04      | Down | 0.48  | 0.62      |      | -0.12 | 0.85  |      | PLAC8 family protein                                                       |
| Pc_TC078639 | -1.37 | 0.08  |      | -5.03 | 6.58E-005 | Down | -0.94 | 0.43      |      | -1.07 | 0.21  |      | Expressed protein                                                          |
| Pc_TC078640 | -2.38 | 0.01  | Down | -2.53 | 0.01      | Down | -1.18 | 0.32      |      | -0.8  | 0.34  |      | Uncharacterized protein                                                    |
| Pc_TC078641 | -1.2  | 0.35  |      | 0.78  | 0.48      |      | 1.59  | 0.22      |      | 2.18  | 0.02  | Up   | Expressed protein                                                          |

|             |       |       |      |       |           |      |       |           |      |       |       |      |                                                                              |
|-------------|-------|-------|------|-------|-----------|------|-------|-----------|------|-------|-------|------|------------------------------------------------------------------------------|
| Pc_TC078645 | -1.12 | 0.21  |      | -0.06 | 0.98      |      | -4.78 | 0.01      | Down | 0     | ##### |      | Uncharacterized protein                                                      |
| Pc_TC078646 | -0.79 | 0.22  |      | -1.74 | 0.03      | Down | 0.26  | 0.81      |      | -1.58 | 0.05  | Down | HEAT repeat ;HECT-domain (ubiquitin-transferase)                             |
| Pc_TC078651 | -5.9  | ##### | Down | -4.04 | 3.11E-006 | Down | -3.54 | 0         | Down | -5.62 | ##### | Down | Expressed protein                                                            |
| Pc_TC078667 | 4.33  | 0     | Up   | 3.06  | 0.08      |      | 3.63  | 0.05      | Up   | 3.83  | 0.01  | Up   | FBD,F-box and Leucine Rich Repeat domains containing protein                 |
| Pc_TC078683 | 0.67  | 0.29  |      | 1.38  | 0.05      | Up   | 0     | 1         |      | 0.98  | 0.18  |      | Expressed protein                                                            |
| Pc_TC078703 | -4.28 | 0     | Down | -1.71 | 0.1       |      | -0.07 | 0.97      |      | -0.37 | 0.7   |      | aminoacyl-tRNA ligases;nucleotide binding;ATP binding;aminoacyl-tRNA ligases |
| Pc_TC078711 | -1.45 | 0.03  | Down | -1.56 | 0.04      | Down | 0.21  | 0.85      |      | 0.2   | 0.79  |      | Uncharacterized protein (Fragment)                                           |
| Pc_TC078712 | 0.84  | 0.44  |      | 2.29  | 0.02      | Up   | 3.53  | 0         | Up   | 2.25  | 0.02  | Up   | Expressed protein                                                            |
| Pc_TC078714 | -0.16 | 0.87  |      | 0.18  | 0.86      |      | -2.85 | 0.04      | Down | -1.31 | 0.17  |      | Expressed protein                                                            |
| Pc_TC078715 | -2.57 | 0.04  | Down | 0.46  | 0.67      |      | -5.14 | 0.01      | Down | -2.43 | 0.05  |      | Expressed protein                                                            |
| Pc_TC078722 | -1.57 | 0.07  |      | -3    | 0.01      | Down | 0.98  | 0.39      |      | 1.17  | 0.13  |      | Expressed protein                                                            |
| Pc_TC078725 | 1.04  | 0.23  |      | 1.75  | 0.05      |      | 0.07  | 1         |      | 1.83  | 0.04  | Up   | Expressed protein                                                            |
| Pc_TC078728 | -0.54 | 0.53  |      | -3.26 | 0.01      | Down | 0.23  | 0.87      |      | -0.7  | 0.47  |      | Expressed protein                                                            |
| Pc_TC078744 | 0.89  | 0.11  |      | 1.4   | 0.03      | Up   | -4.41 | 0         | Down | -2.6  | 0     | Down | Leucine-rich repeat protein kinase family protein                            |
| Pc_TC078746 | 1.37  | 0.18  |      | 2.53  | 0.01      | Up   | 1.8   | 0.19      |      | 0.56  | 0.69  |      | Expressed protein                                                            |
| Pc_TC078751 | 0.84  | 0.13  |      | -5.45 | 3.67E-007 | Down | 1.12  | 0.27      |      | -0.2  | 0.79  |      | actin 7                                                                      |
| Pc_TC078754 | 2.58  | 0     | Up   | 0     | 0.01      |      | 2.11  | 0.08      |      | 0.73  | 0.48  |      | Putative uncharacterized protein OSJNBb0024F06.8                             |
| Pc_TC078761 | -2.36 | 0.02  | Down | -0.19 | 0.87      |      | 1.33  | 0.25      |      | 0.13  | 0.91  |      | Expressed protein                                                            |
| Pc_TC078773 | 0.04  | 0.94  |      | 0.07  | 0.92      |      | -3.94 | 0         | Down | -3.14 | ##### | Down | Expressed protein                                                            |
| Pc_TC078785 | 0.43  | 0.39  |      | 1.14  | 0.05      |      | -2.03 | 0.06      |      | -1.48 | 0.04  | Down | Expressed protein                                                            |
| Pc_TC078797 | 0.18  | 0.81  |      | 0.72  | 0.34      |      | -3.19 | 0.02      | Down | -1.88 | 0.03  | Down | Expressed protein                                                            |
| Pc_TC078810 | 0.65  | 0.17  |      | 0.53  | 0.36      |      | -1.1  | 0.28      |      | -1.95 | 0.01  | Down | Expressed protein                                                            |
| Pc_TC078815 | -0.01 | 1     |      | 1.24  | 0.02      | Up   | -2.82 | 0.01      | Down | -1.55 | 0.02  | Down | Expressed protein                                                            |
| Pc_TC078826 | -2.41 | 0.04  | Down | -2.43 | 0.06      |      | 0.8   | 0.52      |      | -0.18 | 0.89  |      | Expressed protein                                                            |
| Pc_TC078832 | -2.38 | 0.06  |      | -3.4  | 0.03      | Down | -1.26 | 0.4       |      | -1.51 | 0.21  |      | cytidine/deoxycytidylate deaminase family protein                            |
| Pc_TC078834 | -2.77 | 0.01  | Down | -1.94 | 0.08      |      | -0.14 | 0.93      |      | 0.16  | 0.89  |      | cytidine/deoxycytidylate deaminase family protein                            |
| Pc_TC078838 | 0.17  | 0.72  |      | 0.32  | 0.59      |      | -1.5  | 0.14      |      | -1.34 | 0.04  | Down | Uncharacterized protein                                                      |
| Pc_TC078852 | -0.6  | 0.46  |      | -0.13 | 0.9       |      | 2.11  | 0.06      |      | 1.62  | 0.03  | Up   | Uncharacterized protein                                                      |
| Pc_TC078853 | -1.04 | 0.09  |      | -2.02 | 0.01      | Down | 0.06  | 0.96      |      | -0.32 | 0.66  |      | Putative uncharacterized protein Sb10g024703 (Fragment)                      |
| Pc_TC078854 | -1.68 | 0.04  | Down | -1.17 | 0.19      |      | 0.85  | 0.45      |      | -0.24 | 0.79  |      | Uncharacterized protein                                                      |
| Pc_TC078865 | 0.29  | 0.64  |      | 0.52  | 0.45      |      | -2.4  | 0.04      | Down | -1.45 | 0.06  |      | Expressed protein                                                            |
| Pc_TC078868 | 0.83  | 0.18  |      | 1.37  | 0.05      | Up   | -0.22 | 0.85      |      | 0.21  | 0.79  |      | Expressed protein                                                            |
| Pc_TC078877 | -0.28 | 0.85  |      | 0.06  | 1         |      | -4.67 | 0.03      | Down | -1.54 | 0.24  |      | Expressed protein                                                            |
| Pc_TC078882 | 0.08  | 0.95  |      | -2.3  | 0.03      | Down | -0.09 | 0.96      |      | 1.12  | 0.16  |      | Expressed protein                                                            |
| Pc_TC078900 | 2.04  | 0     | Up   | 0     | 0         |      | 1.53  | 0.18      |      | 0.16  | 0.88  |      | Expressed protein                                                            |
| Pc_TC078909 | 0.48  | 0.13  |      | 0.07  | 0.87      |      | -1.05 | 0.22      |      | -1.26 | 0.01  | Down | Expressed protein                                                            |
| Pc_TC078910 | -0.32 | 0.78  |      | 0.54  | 0.6       |      | -2.82 | 0.08      |      | -3.43 | 0.01  | Down | Expressed protein                                                            |
| Pc_TC078922 | 1.99  | 0     | Up   | 0     | 3.22E-006 |      | 1.86  | 0.08      |      | -0.56 | 0.51  |      | Expressed protein                                                            |
| Pc_TC078923 | 0.38  | 0.53  |      | 0.43  | 0.54      |      | -2.46 | 0.04      | Down | -0.21 | 0.78  |      | Expressed protein                                                            |
| Pc_TC078931 | -0.09 | 0.94  |      | 0.29  | 0.75      |      | -2.99 | 0.04      | Down | -2.28 | 0.03  | Down | Expressed protein                                                            |
| Pc_TC078935 | 0.87  | 0.02  |      | 0.25  | 0.62      |      | -0.52 | 0.57      |      | 1.13  | 0.04  | Up   | Expressed protein                                                            |
| Pc_TC078949 | -0.92 | 0.36  |      | -0.16 | 0.91      |      | -5.3  | 0.01      | Down | -2.86 | 0.02  | Down | Expressed protein                                                            |
| Pc_TC078961 | -0.34 | 1     |      | 0.38  | 0.97      |      | 3.2   | 0.04      | Up   | 1.95  | 0.19  |      | Expressed protein                                                            |
| Pc_TC078968 | -1.96 | 0     | Down | -0.46 | 0.53      |      | -0.52 | 0.63      |      | -0.85 | 0.25  |      | Expressed protein                                                            |
| Pc_TC078978 | 0.9   | 0     |      | 1.08  | 0.01      | Up   | -4.33 | 1.04E-005 | Down | -1.1  | 0.04  | Down | Expressed protein                                                            |
| Pc_TC078984 | 0.12  | 0.88  |      | 0.24  | 0.77      |      | -2.69 | 0.04      | Down | -3.11 | 0     | Down | Expressed protein                                                            |
| Pc_TC078991 | 0.58  | 0.13  |      | 0.89  | 0.06      |      | -2.48 | 0.01      | Down | -1.03 | 0.07  |      | Expressed protein                                                            |
| Pc_TC079011 | 0.28  | 0.61  |      | 0.35  | 0.6       |      | -2.79 | 0.02      | Down | -1.89 | 0.01  | Down | Expressed protein                                                            |
| Pc_TC079021 | -0.51 | 1     |      | 3     | 0.04      | Up   | 0     | 0.36      |      | -1.96 | 0.63  |      | Expressed protein                                                            |
| Pc_TC079026 | -0.31 | 0.81  |      | 0.06  | 1         |      | -1.89 | 0.23      |      | -3.18 | 0.03  | Down | Expressed protein                                                            |
| Pc_TC079027 | 0.47  | 0.68  |      | 0.64  | 0.59      |      | -4.5  | 0.04      | Down | -1.57 | 0.25  |      | Transducin/WD40 repeat-like superfamily protein                              |
| Pc_TC079032 | -0.56 | 0.29  |      | -1.31 | 0.05      | Down | 1.48  | 0.12      |      | 0.69  | 0.27  |      | Expressed protein                                                            |
| Pc_TC079035 | 1.42  | 0.01  | Up   | 0     | 1.89E-008 |      | 1.46  | 0.16      |      | -0.19 | 0.8   |      | Ribosomal protein L7Ae/L30e/S12e/Gadd45 family protein                       |
| Pc_TC079037 | 0.15  | 0.88  |      | 1.63  | 0.04      | Up   | -1.53 | 0.25      |      | 0.01  | 1     |      | Expressed protein                                                            |
| Pc_TC079045 | 0.65  | 0.17  |      | 1     | 0.08      |      | 0.58  | 0.55      |      | 1.21  | 0.05  | Up   | S-adenosyl-L-methionine-dependent methyltransferases superfamily protein     |
| Pc_TC079051 | 0     | 0     |      | -3.26 | 0.05      | Down | -3.23 | 0.07      |      | -2.11 | 0.11  |      | aldehyde dehydrogenase 2B4                                                   |
| Pc_TC079054 | -1.38 | 0.05  | Down | -0.55 | 0.48      |      | 1.09  | 0.3       |      | 0.06  | 0.95  |      | Expressed protein                                                            |
| Pc_TC079057 | -0.2  | 0.77  |      | 0.11  | 0.89      |      | -3.28 | 0.01      | Down | -1.81 | 0.03  | Down | Expressed protein                                                            |
| Pc_TC079078 | 0.49  | 0.71  |      | 2.76  | 0         | Up   | -2.08 | 0.28      |      | -2.96 | 0.1   |      | Expressed protein                                                            |
| Pc_TC079080 | -0.31 | 0.62  |      | -1.58 | 0.04      | Down | 0.25  | 0.82      |      | -0.63 | 0.39  |      | nodulin MtN21 /EamA-like transporter family protein                          |
| Pc_TC079082 | 2.4   | 0.4   |      | 3.23  | 0.18      |      | 3.67  | 0.12      |      | 4.08  | 0.03  | Up   | cysteine-rich RLK (RECEPTOR-like protein kinase) 8                           |
| Pc_TC079085 | 1.82  | 0.03  | Up   | 1.31  | 0.19      |      | 3.25  | 0.01      | Up   | 2.73  | 0     | Up   | disease resistance protein (TIR-NBS-LRR class)                               |

|             |       |       |      |  |       |           |      |       |      |      |       |      |      |                                                                          |
|-------------|-------|-------|------|--|-------|-----------|------|-------|------|------|-------|------|------|--------------------------------------------------------------------------|
| Pc_TC079086 | -0.82 | 0.15  |      |  | -1.63 | 0.02      | Down | -0.7  | 0.5  |      | -0.71 | 0.3  |      | disease resistance protein (TIR-NBS-LRR class)                           |
| Pc_TC079090 | 1.05  | 0.11  |      |  | 0.57  | 0.49      |      | -2.79 | 0.04 | Down | -1.27 | 0.16 |      | Expressed protein                                                        |
| Pc_TC079100 | 0.16  | 0.88  |      |  | -0.03 | 1         |      | 2.26  | 0.05 | Up   | 1.32  | 0.11 |      | Expressed protein                                                        |
| Pc_TC079114 | 3.89  | ##### | Up   |  | 3.98  | 1.54E-007 | Up   | 1.04  | 0.42 |      | 3.04  | 0    | Up   | Expressed protein                                                        |
| Pc_TC079120 | -0.61 | 0.28  |      |  | -1.42 | 0.05      | Down | -0.22 | 0.83 |      | 0.07  | 0.92 |      | Expressed protein                                                        |
| Pc_TC079126 | 1.02  | 0.33  |      |  | 2.09  | 0.04      | Up   | 0.71  | 0.65 |      | 0.92  | 0.42 |      | high-affinity K+ transporter 1                                           |
| Pc_TC079137 | 0.41  | 0.37  |      |  | 0.48  | 0.39      |      | -2.04 | 0.05 | Down | -1.3  | 0.05 | Down | Expressed protein                                                        |
| Pc_TC079145 | -0.48 | 0.49  |      |  | -2.75 | 0         | Down | -0.72 | 0.52 |      | -0.6  | 0.45 |      | Expressed protein                                                        |
| Pc_TC079146 | 1.6   | 0.01  | Up   |  | 0.95  | 0.24      |      | 0.71  | 0.54 |      | 2.09  | 0.01 | Up   | Expressed protein                                                        |
| Pc_TC079156 | -0.49 | 0.27  |      |  | -1.52 | 0.01      | Down | 0.48  | 0.6  |      | 0.6   | 0.3  |      | Expressed protein                                                        |
| Pc_TC079157 | -1.01 | 0.14  |      |  | -1.78 | 0.03      | Down | 0.51  | 0.64 |      | 0.09  | 0.91 |      | Expressed protein                                                        |
| Pc_TC079162 | 0.58  | 0.35  |      |  | 0.76  | 0.29      |      | -1.09 | 0.34 |      | -2.39 | 0.01 | Down | Expressed protein                                                        |
| Pc_TC079168 | 0.43  | 0.45  |      |  | 0.13  | 0.86      |      | -4.24 | 0    | Down | -2.16 | 0.01 | Down | Expressed protein                                                        |
| Pc_TC079171 | 0.2   | 0.7   |      |  | -0.13 | 0.84      |      | -1.55 | 0.14 |      | -1.4  | 0.05 | Down | Expressed protein                                                        |
| Pc_TC079173 | 0.67  | 0.36  |      |  | 2.01  | 0.01      | Up   | 0     | 0    |      | -0.55 | 0.56 |      | Expressed protein                                                        |
| Pc_TC079174 | 0.89  | 0.68  |      |  | 2.96  | 0.02      | Up   | 0     | 0.26 |      | -0.79 | 0.84 |      | Uncharacterized protein                                                  |
| Pc_TC079176 | -4.49 | ##### | Down |  | -2.77 | 0.01      | Down | 1.4   | 0.19 |      | -3.2  | 0    | Down | Expressed protein                                                        |
| Pc_TC079180 | -0.47 | 0.6   |      |  | 0.3   | 0.76      |      | -2.04 | 0.14 |      | -2.3  | 0.03 | Down | Expressed protein                                                        |
| Pc_TC079184 | -1.43 | 0     | Down |  | -2.15 | 5.28E-005 | Down | -0.48 | 0.59 |      | 0.28  | 0.61 |      | EF-TU receptor                                                           |
| Pc_TC079191 | -2.24 | 0.01  | Down |  | -0.48 | 0.6       |      | 0.53  | 0.65 |      | -0.35 | 0.7  |      | Polynucleotidyl transferase,ribonuclease H-like superfamily protein      |
| Pc_TC079193 | 2.87  | ##### | Up   |  | -0.87 | 0.49      |      | 0.78  | 0.56 |      | 0.69  | 0.5  |      | Expressed protein                                                        |
| Pc_TC079194 | -2.08 | 0     | Down |  | 0.53  | 0.45      |      | -0.63 | 0.57 |      | -0.95 | 0.22 |      | Expressed protein                                                        |
| Pc_TC079201 | 0.08  | 1     |      |  | 3.23  | 0.02      | Up   | 0     | 0.36 |      | 0     | 0.35 |      | Putative uncharacterized protein                                         |
| Pc_TC079207 | -3.48 | 0     | Down |  | -1.1  | 0.25      |      | -0.24 | 0.85 |      | -3.12 | 0    | Down | Expressed protein                                                        |
| Pc_TC079208 | -0.65 | 0.03  |      |  | -1.32 | 0         | Down | 0.57  | 0.49 |      | -0.08 | 0.88 |      | Expressed protein                                                        |
| Pc_TC079210 | -0.79 | 0.11  |      |  | -1.38 | 0.03      | Down | 0.53  | 0.57 |      | -0.56 | 0.37 |      | Expressed protein                                                        |
| Pc_TC079224 | 0.89  | 0.17  |      |  | 1.6   | 0.02      | Up   | -1.19 | 0.32 |      | 0.01  | 1    |      | Expressed protein                                                        |
| Pc_TC079231 | 2.27  | 0.01  | Up   |  | 2.73  | 0         | Up   | 2.11  | 0.1  |      | 2.16  | 0.02 | Up   | P-loop containing nucleoside triphosphate hydrolases superfamily protein |
| Pc_TC079276 | 2.22  | 0.07  |      |  | 2.2   | 0.11      |      | 2.09  | 0.2  |      | 2.7   | 0.03 | Up   | Expressed protein                                                        |
| Pc_TC079278 | 2.6   | 0.04  | Up   |  | 2.15  | 0.15      |      | 1.5   | 0.45 |      | 2.48  | 0.07 |      | Expressed protein                                                        |
| Pc_TC079281 | 2.98  | 0     | Up   |  | 0     | 0.05      |      | 2.47  | 0.06 |      | 1.45  | 0.19 |      | Expressed protein                                                        |
| Pc_TC079285 | 1.58  | 0.01  | Up   |  | 0     | 8.90E-006 |      | 0.53  | 0.65 |      | -0.58 | 0.5  |      | Uncharacterized protein                                                  |
| Pc_TC079309 | 0.16  | 0.83  |      |  | 0.56  | 0.46      |      | -4.28 | 0    | Down | -0.65 | 0.44 |      | Expressed protein                                                        |
| Pc_TC079326 | -0.21 | 0.72  |      |  | -0.99 | 0.16      |      | 2.82  | 0    | Up   | 1.28  | 0.05 | Up   | aconitase 3                                                              |
| Pc_TC079332 | 1.46  | 0     | Up   |  | 0     | 6.74E-011 |      | 1.06  | 0.29 |      | -0.53 | 0.45 |      | Ribosomal protein L19e family protein                                    |
| Pc_TC079340 | 0     | 0     |      |  | -2.68 | 0.08      |      | -0.06 | 1    |      | -4.7  | 0.01 | Down | Expressed protein                                                        |
| Pc_TC079347 | -2.92 | 0.01  | Down |  | -2.36 | 0.05      |      | 1.86  | 0.11 |      | 1.48  | 0.07 |      | Expressed protein                                                        |
| Pc_TC079348 | -3.68 | ##### | Down |  | -1.09 | 0.18      |      | -0.59 | 0.6  |      | -0.74 | 0.35 |      | Expressed protein                                                        |
| Pc_TC079349 | 0.16  | 0.85  |      |  | 1.03  | 0.19      |      | -2.77 | 0.04 | Down | 0.03  | 1    |      | Expressed protein                                                        |
| Pc_TC079350 | 0.9   | 0.12  |      |  | 0.17  | 0.83      |      | 1.37  | 0.19 |      | 1.61  | 0.02 | Up   | Expressed protein                                                        |
| Pc_TC079351 | -0.55 | 0.21  |      |  | -1.58 | 0.01      | Down | 0.69  | 0.45 |      | -0.01 | 0.99 |      | Expressed protein                                                        |
| Pc_TC079357 | 0     | 0     |      |  | 0     | 0         |      | -5.35 | 0.01 | Down | -1.91 | 0.09 |      | GTP binding Elongation factor Tu family protein                          |
| Pc_TC079363 | 0.72  | 0.26  |      |  | 1.01  | 0.16      |      | -3.4  | 0.01 | Down | -2.21 | 0.01 | Down | Expressed protein                                                        |
| Pc_TC079368 | -0.94 | 0.07  |      |  | -1.76 | 0.01      | Down | 1.5   | 0.11 |      | 0.79  | 0.19 |      | Expressed protein                                                        |
| Pc_TC079370 | -1.9  | 0.03  | Down |  | -2.14 | 0.03      | Down | 0.2   | 0.88 |      | 0.15  | 0.88 |      | Expressed protein                                                        |
| Pc_TC079379 | 0.4   | 0.41  |      |  | 0.4   | 0.51      |      | -1.95 | 0.07 |      | -1.38 | 0.04 | Down | SC35-like splicing factor 30A                                            |
| Pc_TC079380 | 0.48  | 0.22  |      |  | 0.39  | 0.43      |      | -2.49 | 0.01 | Down | -1.34 | 0.03 | Down | SC35-like splicing factor 30A                                            |
| Pc_TC079390 | -0.92 | 0.39  |      |  | -2.94 | 0.04      | Down | 0.59  | 0.66 |      | -0.96 | 0.4  |      | Expressed protein                                                        |
| Pc_TC079397 | -0.56 | 0.45  |      |  | 1.06  | 0.15      |      | -4.98 | 0    | Down | -3.44 | 0    | Down | Expressed protein                                                        |
| Pc_TC079411 | 0.69  | 0.33  |      |  | 1.06  | 0.18      |      | -6.11 | 0    | Down | -1.13 | 0.22 |      | Expressed protein                                                        |
| Pc_TC079417 | -0.53 | 0.29  |      |  | -0.41 | 0.51      |      | -0.23 | 0.81 |      | -1.56 | 0.02 | Down | Expressed protein                                                        |
| Pc_TC079425 | 0.14  | 0.88  |      |  | 1.57  | 0.04      | Up   | -5.05 | 0    | Down | -2.47 | 0.02 | Down | Expressed protein                                                        |
| Pc_TC079427 | -0.32 | 0.61  |      |  | 0.04  | 0.97      |      | -0.84 | 0.44 |      | -1.92 | 0.02 | Down | Expressed protein                                                        |
| Pc_TC079440 | -2.05 | 0.05  | Down |  | -2.07 | 0.07      |      | -1.63 | 0.23 |      | -1.6  | 0.13 |      | Expressed protein                                                        |
| Pc_TC079441 | 0.91  | 0.07  |      |  | 0.27  | 0.68      |      | -0.34 | 0.74 |      | 1.35  | 0.03 | Up   | Expressed protein                                                        |
| Pc_TC079445 | 0.14  | 0.93  |      |  | -1.66 | 0.2       |      | 0.27  | 0.87 |      | -2.9  | 0.03 | Down | Expressed protein                                                        |
| Pc_TC079472 | 3.25  | 0.03  | Up   |  | 4.81  | 0         | Up   | 2.31  | 0.3  |      | 3.98  | 0    | Up   | Expressed protein                                                        |
| Pc_TC079484 | 1.59  | 0.18  |      |  | 1.77  | 0.16      |      | 1.98  | 0.19 |      | 2.46  | 0.03 | Up   | Photosystem II reaction center PsbP family protein                       |
| Pc_TC079485 | 4.06  | ##### | Up   |  | 2.87  | 0.02      | Up   | 2.91  | 0.05 |      | 1.95  | 0.15 |      | Photosystem II reaction center PsbP family protein                       |
| Pc_TC079486 | -4.31 | ##### | Down |  | -0.56 | 0.45      |      | -0.63 | 0.56 |      | -0.81 | 0.28 |      | Photosystem II reaction center PsbP family protein                       |
| Pc_TC079497 | 0.41  | 0.4   |      |  | -0.57 | 0.36      |      | 0.34  | 0.73 |      | 1.3   | 0.03 | Up   | Expressed protein                                                        |
| Pc_TC079505 | 2.4   | 0.11  |      |  | 3.52  | 0.01      | Up   | 2.09  | 0.29 |      | -0.37 | 1    |      | Expressed protein                                                        |

|             |       |       |      |       |           |      |       |           |      |       |       |      |                                                     |     |
|-------------|-------|-------|------|-------|-----------|------|-------|-----------|------|-------|-------|------|-----------------------------------------------------|-----|
| Pc_TC079507 | 0.8   | 0.07  |      | 0     | 2.86E-015 |      | -0.6  | 0.54      |      | -2.13 | 0     | Down | Triacylglycerol lipase                              |     |
| Pc_TC079508 | 4.6   | ##### | Up   | 0     | 0.48      |      | 1.92  | 0.35      |      | 0.04  | 1     |      | Expressed protein                                   |     |
| Pc_TC079511 | -1.65 | 0.02  | Down | 0.56  | 0.44      |      | -0.17 | 0.88      |      | -1.18 | 0.14  |      | NB-ARC domain-containing disease resistance protein |     |
| Pc_TC079512 | 1.85  | 0.03  | Up   | 1.43  | 0.15      |      | 0.63  | 0.67      |      | 0.49  | 0.67  |      | Expressed protein                                   |     |
| Pc_TC079527 | -0.28 | 0.64  |      | 1.34  | 0.03      | Up   | -2.86 | 0.02      | Down | -1.12 | 0.13  |      | Expressed protein                                   |     |
| Pc_TC079528 | 0.37  | 0.42  |      | 0.67  | 0.23      |      | -2.97 | 0.01      | Down | -2.05 | 0     | Down | Expressed protein                                   | HSF |
| Pc_TC079536 | 5.08  | 0     | Up   | 2.87  | 0.28      |      | 4.83  | 0.02      | Up   | 6.03  | ##### | Up   | Expressed protein                                   |     |
| Pc_TC079565 | -0.11 | 0.86  |      | 0.94  | 0.14      |      | -2.37 | 0.04      | Down | -1.66 | 0.03  | Down | Expressed protein                                   |     |
| Pc_TC079577 | 3.33  | 0.03  | Up   | 3.52  | 0.03      | Up   | -0.5  | 1         |      | 1.95  | 0.36  |      | Expressed protein                                   |     |
| Pc_TC079580 | 0.38  | 0.41  |      | 0.45  | 0.43      |      | -2.75 | 0.01      | Down | -1.41 | 0.03  | Down | Expressed protein                                   |     |
| Pc_TC079588 | 0.25  | 0.49  |      | 0.28  | 0.54      |      | -5.04 | 2.67E-006 | Down | -1.88 | 0     | Down | Expressed protein                                   |     |
| Pc_TC079593 | 2.21  | 0.03  | Up   | 1.38  | 0.29      |      | 2.2   | 0.12      |      | 2.38  | 0.03  | Up   | Expressed protein                                   |     |
| Pc_TC079604 | 0.44  | 0.43  |      | 0.88  | 0.17      |      | -3.43 | 0         | Down | -2.31 | 0     | Down | Expressed protein                                   |     |
| Pc_TC079613 | -1.82 | 0.01  | Down | -0.57 | 0.47      |      | -3.71 | 0         | Down | -3.01 | 0     | Down | Expressed protein                                   |     |
| Pc_TC079615 | -0.52 | 0.41  |      | 0.59  | 0.38      |      | -3.58 | 0         | Down | -2.9  | 0     | Down | Expressed protein                                   |     |
| Pc_TC079620 | 0.88  | 0.15  |      | 0.87  | 0.22      |      | -3.22 | 0.01      | Down | -2.16 | 0.01  | Down | Putative uncharacterized protein OSJNBa0038J17.29   |     |
| Pc_TC079624 | 0.34  | 0.52  |      | 0.44  | 0.48      |      | -4.28 | 0         | Down | -2.09 | 0     | Down | Expressed protein                                   |     |
| Pc_TC079635 | -3.8  | ##### | Down | -0.47 | 0.56      |      | -0.04 | 0.98      |      | -2.13 | 0.01  | Down | Expressed protein                                   |     |
| Pc_TC079636 | -3.73 | 0.05  | Down | 1.34  | 0.21      |      | 0.16  | 0.96      |      | -0.18 | 0.94  |      | Expressed protein                                   |     |
| Pc_TC079640 | 0.48  | 0.25  |      | 0.49  | 0.36      |      | -3.4  | 0         | Down | -1.46 | 0.02  | Down | Expressed protein                                   |     |
| Pc_TC079648 | -0.41 | 0.8   |      | 0.89  | 0.44      |      | 1.37  | 0.32      |      | 2.63  | 0     | Up   | Expressed protein                                   |     |
| Pc_TC079649 | -0.72 | 0.23  |      | -1.56 | 0.04      | Down | 1.95  | 0.05      | Up   | 1.19  | 0.07  |      | Expressed protein                                   |     |
| Pc_TC079660 | -1.42 | 0.28  |      | -0.44 | 0.77      |      | -4.58 | 0.03      | Down | -1    | 0.44  |      | Expressed protein                                   |     |
| Pc_TC079672 | 2.66  | 0.02  | Up   | 2.13  | 0.12      |      | 1.83  | 0.28      |      | 1.3   | 0.4   |      | Uncharacterized protein                             |     |
| Pc_TC079681 | 0.15  | 0.83  |      | 1.27  | 0.06      |      | -3.22 | 0.01      | Down | -1.49 | 0.06  |      | Expressed protein                                   |     |
| Pc_TC079690 | 0.08  | 0.86  |      | 0.73  | 0.16      |      | -3.89 | 0         | Down | -2.04 | 0     | Down | Leucine Rich Repeat family protein expressed        |     |
| Pc_TC079691 | 4.52  | ##### | Up   | 4.96  | 1.08E-005 | Up   | 3.17  | 0.06      |      | 0.63  | 0.88  |      | Uncharacterized protein                             |     |
| Pc_TC079698 | 0.13  | 0.79  |      | 0.7   | 0.2       |      | -1.21 | 0.23      |      | -1.56 | 0.02  | Down | Expressed protein                                   |     |
| Pc_TC079703 | 1.91  | 0.02  | Up   | 2.89  | 0         | Up   | -2.5  | 0.16      |      | -2.37 | 0.11  |      | Expressed protein                                   |     |
| Pc_TC079708 | 1.09  | 0.04  | Up   | 0.64  | 0.33      |      | -0.76 | 0.48      |      | 0.47  | 0.5   |      | Expressed protein                                   |     |
| Pc_TC079714 | -0.57 | 0.4   |      | -0.97 | 0.22      |      | 2.6   | 0.01      | Up   | 1.31  | 0.06  |      | Expressed protein                                   |     |
| Pc_TC079724 | 0.02  | 0.99  |      | 0.61  | 0.39      |      | -2.67 | 0.03      | Down | -1.92 | 0.02  | Down | Uncharacterized protein                             |     |
| Pc_TC079725 | -0.99 | 0.16  |      | -1.11 | 0.17      |      | -4.67 | 0         | Down | -1.87 | 0.03  | Down | Expressed protein                                   |     |
| Pc_TC079749 | -3.73 | 0.01  | Down | 0     | 0         |      | -0.4  | 0.78      |      | -1.37 | 0.21  |      | Expressed protein                                   |     |
| Pc_TC079755 | 0.33  | 0.41  |      | 0.41  | 0.42      |      | -2.09 | 0.03      | Down | -1    | 0.1   |      | starch branching enzyme 2.2                         |     |
| Pc_TC079763 | -1.27 | 0.01  | Down | -0.14 | 0.8       |      | -1.87 | 0.06      |      | -0.53 | 0.39  |      | Expressed protein                                   |     |
| Pc_TC079764 | 1.86  | 0.03  | Up   | 1.16  | 0.29      |      | 1.74  | 0.19      |      | 1.65  | 0.1   |      | Expressed protein                                   |     |
| Pc_TC079766 | 0.78  | 0.08  |      | -0.86 | 0.16      |      | 0.14  | 0.89      |      | -2.09 | 0     | Down | Expressed protein                                   |     |
| Pc_TC079770 | 0.84  | 0.44  |      | 1.68  | 0.11      |      | 0     | 0.03      |      | -4.08 | 0.04  | Down | Expressed protein                                   |     |
| Pc_TC079784 | -0.53 | 0.61  |      | 0     | 1         |      | -3.61 | 0.03      | Down | -1.08 | 0.33  |      | Expressed protein                                   |     |
| Pc_TC079801 | -2.99 | 0     | Down | -0.58 | 0.56      |      | -0.68 | 0.6       |      | -0.86 | 0.37  |      | Expressed protein                                   |     |
| Pc_TC079805 | 1.36  | 0.04  | Up   | 0     | 8.53E-005 |      | 1.5   | 0.18      |      | 0.56  | 0.51  |      | Expressed protein                                   |     |
| Pc_TC079825 | 0.49  | 0.49  |      | 1.23  | 0.1       |      | -3.47 | 0.01      | Down | -1.07 | 0.23  |      | Expressed protein                                   |     |
| Pc_TC079826 | 0.33  | 0.55  |      | 0.88  | 0.17      |      | -4.61 | 0         | Down | -3.49 | ##### | Down | Expressed protein                                   |     |
| Pc_TC079830 | -1.76 | 0.06  |      | -3.37 | 0.01      | Down | 1.4   | 0.22      |      | 0.03  | 1     |      | Expressed protein                                   |     |
| Pc_TC079834 | 0.35  | 0.36  |      | 0.71  | 0.14      |      | -1.87 | 0.05      | Down | -0.77 | 0.18  |      | Expressed protein                                   |     |
| Pc_TC079840 | 1.73  | 0.14  |      | 2.38  | 0.04      | Up   | -2.3  | 0.36      |      | -2.18 | 0.32  |      | Expressed protein                                   |     |
| Pc_TC079842 | -0.25 | 0.8   |      | 1.82  | 0.02      | Up   | -0.68 | 0.61      |      | -1.65 | 0.12  |      | RNA binding Plectin/S10 domain-containing protein   |     |
| Pc_TC079851 | 0.11  | 0.91  |      | 0     | 5.43E-005 |      | 0.79  | 0.49      |      | -2.12 | 0.03  | Down | Expressed protein                                   |     |
| Pc_TC079853 | -0.46 | 0.74  |      | -2.36 | 0.15      |      | -3.5  | 0.08      |      | -3.37 | 0.04  | Down | Expressed protein                                   |     |
| Pc_TC079860 | -0.18 | 0.69  |      | -1.16 | 0.05      | Down | 2.22  | 0.01      | Up   | 1.18  | 0.04  | Up   | Expressed protein                                   |     |
| Pc_TC079864 | 0.28  | 0.56  |      | 0.27  | 0.64      |      | -2.09 | 0.05      | Down | -0.68 | 0.29  |      | Expressed protein                                   |     |
| Pc_TC079878 | 2.04  | 0.01  | Up   | 0     | 0.01      |      | 3.27  | 0.01      | Up   | 2.54  | 0     | Up   | glycine/proline-rich protein                        |     |
| Pc_TC079880 | -0.38 | 0.54  |      | -0.98 | 0.18      |      | 0.78  | 0.45      |      | 1.41  | 0.03  | Up   | Expressed protein                                   |     |
| Pc_TC079894 | 0.43  | 0.56  |      | 1.18  | 0.13      |      | -3.14 | 0.03      | Down | -2.32 | 0.02  | Down | Expressed protein                                   |     |
| Pc_TC079908 | -3.73 | 0.05  | Down | -0.75 | 0.63      |      | -0.84 | 0.63      |      | -0.09 | 1     |      | Expressed protein                                   |     |
| Pc_TC079915 | 1.11  | 0.01  | Up   | 0     | 7.39E-015 |      | 1.28  | 0.17      |      | -0.01 | 0.99  |      | COP1-interactive protein 1                          |     |
| Pc_TC079918 | -2.17 | 0.03  | Down | -1.1  | 0.29      |      | -0.32 | 0.81      |      | -0.72 | 0.46  |      | Expressed protein                                   |     |
| Pc_TC079924 | 0.15  | 0.93  |      | 0.26  | 0.85      |      | -3.82 | 0.04      | Down | -2.7  | 0.05  |      | Uncharacterized protein                             |     |
| Pc_TC079929 | 0.03  | 0.97  |      | 0.69  | 0.3       |      | -1.47 | 0.18      |      | -1.69 | 0.03  | Down | Expressed protein                                   |     |
| Pc_TC079938 | 0.58  | 0.16  |      | 0.84  | 0.1       |      | -3.05 | 0         | Down | -1.77 | 0.01  | Down | Expressed protein                                   |     |
| Pc_TC079939 | -0.25 | 0.71  |      | 0.09  | 0.92      |      | -3.18 | 0.01      | Down | -2.25 | 0.01  | Down | Expressed protein                                   |     |

|             |       |       |      |       |           |      |  |       |           |      |       |       |      |                                                        |
|-------------|-------|-------|------|-------|-----------|------|--|-------|-----------|------|-------|-------|------|--------------------------------------------------------|
| Pc_TC079946 | 1.52  | 0.03  | Up   | 1.26  | 0.12      |      |  | -1.03 | 0.43      |      | 0.41  | 0.66  |      | Expressed protein                                      |
| Pc_TC079949 | 0.38  | 0.4   |      | 1.21  | 0.02      | Up   |  | -3.58 | 0         | Down | -1.89 | 0     | Down | Expressed protein                                      |
| Pc_TC079950 | 0.16  | 0.8   |      | 1.21  | 0.07      |      |  | -2.77 | 0.02      | Down | -2.59 | 0     | Down | Expressed protein                                      |
| Pc_TC079953 | 1.01  | 0.19  |      | 1.98  | 0.01      | Up   |  | -1.91 | 0.18      |      | -0.13 | 0.93  |      | Expressed protein                                      |
| Pc_TC079962 | 0.19  | 0.59  |      | 0.21  | 0.65      |      |  | -2.55 | 0.01      | Down | -1.25 | 0.03  | Down | Expressed protein                                      |
| Pc_TC079966 | -1.96 | 0.04  | Down | -2.98 | 0.01      | Down |  | -0.43 | 0.74      |      | -0.69 | 0.47  |      | Expressed protein                                      |
| Pc_TC079974 | -0.36 | 0.57  |      | 0.23  | 0.74      |      |  | -5.85 | 7.87E-005 | Down | -1.54 | 0.05  | Down | Expressed protein                                      |
| Pc_TC079977 | 0.01  | 1     |      | -0.1  | 0.89      |      |  | -1.52 | 0.17      |      | -1.64 | 0.03  | Down | Expressed protein                                      |
| Pc_TC079983 | 0.26  | 0.75  |      | 1.63  | 0.03      | Up   |  | -1.44 | 0.26      |      | -0.28 | 0.77  |      | Expressed protein                                      |
| Pc_TC079997 | 0.63  | 0.34  |      | 1.8   | 0.01      | Up   |  | -2.84 | 0.03      | Down | -0.54 | 0.53  |      | Expressed protein                                      |
| Pc_TC080009 | 0.32  | 0.52  |      | 0.24  | 0.69      |      |  | -2.29 | 0.03      | Down | -1.13 | 0.1   |      | Expressed protein                                      |
| Pc_TC080010 | -1.74 | 0.03  | Down | -0.48 | 0.57      |      |  | -0.44 | 0.71      |      | 0.25  | 0.76  |      | Expressed protein                                      |
| Pc_TC080018 | 1.08  | 0.51  |      | 1.64  | 0.28      |      |  | 0.18  | 1         |      | 2.55  | 0.04  | Up   | Expressed protein                                      |
| Pc_TC080024 | 0.02  | 0.97  |      | 0.46  | 0.45      |      |  | -2.46 | 0.02      | Down | -1.22 | 0.08  |      | Uncharacterized protein                                |
| Pc_TC080025 | -1.67 | 0.03  | Down | -0.15 | 0.87      |      |  | 0.2   | 0.87      |      | -0.06 | 0.96  |      | Os05g0196100 protein (Fragment)                        |
| Pc_TC080033 | 3.17  | 0.04  | Up   | 2.23  | 0.29      |      |  | 3.55  | 0.05      |      | 2.21  | 0.26  |      | Expressed protein                                      |
| Pc_TC080038 | 2.58  | ##### | Up   | 0     | 0         |      |  | 1.4   | 0.23      |      | -0.25 | 0.82  |      | PDI-like 1-1                                           |
| Pc_TC080039 | 0.6   | 0.31  |      | 1.51  | 0.02      | Up   |  | -1.23 | 0.27      |      | -0.65 | 0.4   |      | Expressed protein                                      |
| Pc_TC080047 | -1.08 | 0.02  | Down | -4    | 3.22E-009 | Down |  | -1.25 | 0.19      |      | -3.05 | ##### | Down | RING/U-box superfamily protein                         |
| Pc_TC080048 | 0.69  | 0.1   |      | 0.43  | 0.42      |      |  | -1.34 | 0.17      |      | -1.51 | 0.02  | Down | RING/U-box superfamily protein                         |
| Pc_TC080049 | 0.39  | 0.35  |      | 1.07  | 0.03      | Up   |  | -1.04 | 0.28      |      | -1.44 | 0.02  | Down | RING/U-box superfamily protein                         |
| Pc_TC080050 | -0.08 | 0.84  |      | 0.06  | 0.91      |      |  | -2.51 | 0.01      | Down | -0.43 | 0.46  |      | RING/U-box superfamily protein                         |
| Pc_TC080058 | 1.9   | ##### | Up   | 0     | 4.77E-022 |      |  | 1.72  | 0.05      |      | 0.29  | 0.6   |      | NADH dehydrogenase subunit 4                           |
| Pc_TC080081 | 0.89  | 0.68  |      | 2.81  | 0.04      | Up   |  | 0     | 0.26      |      | 0     | 0.24  |      | cytochrome P450, family 76, subfamily C, polypeptide 4 |
| Pc_TC080086 | 1.56  | 0     | Up   | 1.05  | 0.11      |      |  | 0.1   | 0.94      |      | 1.03  | 0.14  |      | Expressed protein                                      |
| Pc_TC080088 | 0.33  | 0.53  |      | -0.2  | 0.76      |      |  | -2.3  | 0.04      | Down | -0.27 | 0.69  |      | Expressed protein                                      |
| Pc_TC080091 | -0.08 | 0.88  |      | 0.14  | 0.82      |      |  | -1.37 | 0.18      |      | -1.4  | 0.04  | Down | Expressed protein                                      |
| Pc_TC080094 | 0.04  | 0.93  |      | -0.38 | 0.52      |      |  | -1.47 | 0.14      |      | -1.76 | 0.01  | Down | Expressed protein                                      |
| Pc_TC080120 | 1.52  | 0.1   |      | 0.16  | 0.96      |      |  | 1.28  | 0.35      |      | -4.18 | 0.03  | Down | Expressed protein                                      |
| Pc_TC080125 | 0.07  | 0.87  |      | -0.12 | 0.82      |      |  | -2.84 | 0.01      | Down | -1.26 | 0.04  | Down | Expressed protein                                      |
| Pc_TC080126 | 0.18  | 0.72  |      | 0.64  | 0.27      |      |  | -1.33 | 0.2       |      | -1.37 | 0.04  | Down | Expressed protein                                      |
| Pc_TC080139 | -0.27 | 0.69  |      | 0.46  | 0.52      |      |  | -3.38 | 0.01      | Down | -2.31 | 0.01  | Down | Putative RRM RNA binding protein NSAP1                 |
| Pc_TC080164 | -2.48 | 0.01  | Down | -1.02 | 0.26      |      |  | -2.47 | 0.06      |      | -2.8  | 0.01  | Down | Expressed protein                                      |
| Pc_TC080166 | -5.07 | ##### | Down | -3.09 | 0         | Down |  | 0     | 4.49E-005 |      | -5.52 | ##### | Down | cytochrome oxidase                                     |
| Pc_TC080173 | -0.22 | 0.52  |      | 0.19  | 0.66      |      |  | -1.73 | 0.05      |      | -1.12 | 0.03  | Down | Expressed protein                                      |
| Pc_TC080182 | 1.1   | 0     | Up   | 0     | 1.34E-029 |      |  | 1.03  | 0.23      |      | -0.01 | 0.98  |      | ADP/ATP carrier 3                                      |
| Pc_TC080183 | -2.23 | 0.01  | Down | -0.92 | 0.27      |      |  | 0.81  | 0.46      |      | 0.12  | 0.89  |      | Expressed protein                                      |
| Pc_TC080184 | 0     | 1     |      | 0.28  | 0.75      |      |  | -1.82 | 0.15      |      | -2.99 | 0     | Down | Expressed protein                                      |
| Pc_TC080192 | 0.41  | 0.35  |      | 0.53  | 0.32      |      |  | -2.07 | 0.04      | Down | -1.27 | 0.04  | Down | Expressed protein                                      |
| Pc_TC080205 | -2.18 | 0.02  | Down | -4.53 | 0         | Down |  | -1.56 | 0.22      |      | -1.5  | 0.11  |      | Expressed protein                                      |
| Pc_TC080210 | -0.33 | 0.42  |      | -0.42 | 0.41      |      |  | -1.85 | 0.05      |      | -1.87 | 0     | Down | Expressed protein                                      |
| Pc_TC080219 | 0.15  | 0.63  |      | 0.37  | 0.36      |      |  | -2.34 | 0.01      | Down | -1.74 | 0     | Down | Uncharacterized protein                                |
| Pc_TC080240 | 1.4   | 0.4   |      | 3.15  | 0.01      | Up   |  | 0     | 0.26      |      | -1.37 | 0.66  |      | Expressed protein                                      |
| Pc_TC080256 | -0.49 | 0.52  |      | -1.87 | 0.05      | Down |  | 0.13  | 0.92      |      | 0.58  | 0.47  |      | Expressed protein                                      |
| Pc_TC080265 | 0.99  | 0.45  |      | 2.27  | 0.04      | Up   |  | -1.5  | 0.5       |      | 0.63  | 0.69  |      | Putative uncharacterized protein                       |
| Pc_TC080268 | -0.67 | 0.2   |      | -0.59 | 0.34      |      |  | -3.84 | 0         | Down | -3.49 | ##### | Down | Expressed protein                                      |
| Pc_TC080269 | 0.29  | 0.61  |      | 0.78  | 0.23      |      |  | -2.35 | 0.04      | Down | -1.21 | 0.1   |      | Expressed protein                                      |
| Pc_TC080270 | 0.47  | 0.33  |      | 0.44  | 0.46      |      |  | -5.21 | 3.73E-005 | Down | -2.46 | 0     | Down | Expressed protein                                      |
| Pc_TC080280 | 0.7   | 0.29  |      | 0.82  | 0.28      |      |  | -2.71 | 0.04      | Down | -0.97 | 0.26  |      | Expressed protein                                      |
| Pc_TC080295 | 1.43  | 0.01  | Up   | 1.97  | 0         | Up   |  | 0.55  | 0.6       |      | 1.69  | 0.01  | Up   | Expressed protein                                      |
| Pc_TC080296 | -0.6  | 0.17  |      | -0.32 | 0.55      |      |  | -0.87 | 0.36      |      | -2.62 | ##### | Down | Expressed protein                                      |
| Pc_TC080312 | 0.14  | 0.84  |      | -0.27 | 0.74      |      |  | 1.73  | 0.1       |      | 1.59  | 0.02  | Up   | Expressed protein                                      |
| Pc_TC080315 | 0.81  | 0.04  |      | 0.87  | 0.08      |      |  | -1.96 | 0.05      | Down | -0.83 | 0.16  |      | Expressed protein                                      |
| Pc_TC080326 | -0.59 | 0.37  |      | -2.11 | 0.01      | Down |  | 0.61  | 0.57      |      | 0.13  | 0.87  |      | peptidyl-prolyl cis-trans isomerases                   |
| Pc_TC080328 | 0.55  | 0.23  |      | 0.55  | 0.33      |      |  | -3.25 | 0         | Down | -1.36 | 0.04  | Down | Expressed protein                                      |
| Pc_TC080332 | 0.1   | 0.91  |      | 0.91  | 0.22      |      |  | -2.58 | 0.04      | Down | -2.37 | 0.01  | Down | Expressed protein                                      |
| Pc_TC080342 | -0.3  | 0.65  |      | -1.62 | 0.05      | Down |  | -0.74 | 0.5       |      | -0.97 | 0.21  |      | Putative uncharacterized protein                       |
| Pc_TC080348 | 0.46  | 0.48  |      | 1.12  | 0.11      |      |  | -3.29 | 0.01      | Down | -2.29 | 0.01  | Down | Expressed protein                                      |
| Pc_TC080349 | -0.52 | 0.49  |      | 0.82  | 0.28      |      |  | -4.2  | 0         | Down | -4.4  | ##### | Down | Expressed protein                                      |
| Pc_TC080352 | -1.71 | 0.07  |      | -3.19 | 0.01      | Down |  | 1.72  | 0.13      |      | -0.13 | 0.91  |      | Expressed protein                                      |
| Pc_TC080353 | -2.62 | 0.03  | Down | -0.47 | 0.69      |      |  | 2.44  | 0.04      | Up   | 0.97  | 0.29  |      | Expressed protein                                      |
| Pc_TC080371 | 0.08  | 0.87  |      | 0.8   | 0.17      |      |  | -2.58 | 0.02      | Down | -1.76 | 0.01  | Down | Expressed protein                                      |

|             |       |       |      |       |           |      |       |           |      |       |       |      |                                                                          |
|-------------|-------|-------|------|-------|-----------|------|-------|-----------|------|-------|-------|------|--------------------------------------------------------------------------|
| Pc_TC080374 | 0.33  | 0.43  |      | 0.34  | 0.52      |      | -2.21 | 0.03      | Down | -0.97 | 0.11  |      | Uncharacterized protein                                                  |
| Pc_TC080378 | 0.08  | 1     |      | -1.75 | 0.28      |      | 1.37  | 0.32      |      | 2.86  | 0     | Up   | Expressed protein                                                        |
| Pc_TC080380 | -0.32 | 0.65  |      | 0.65  | 0.38      |      | -2.87 | 0.02      | Down | -1.26 | 0.13  |      | Uncharacterized protein                                                  |
| Pc_TC080386 | 0     | 1     |      | 0.43  | 0.56      |      | -3.51 | 0.01      | Down | -2.6  | 0     | Down | Expressed protein                                                        |
| Pc_TC080388 | -2.05 | 0.01  | Down | 0.48  | 0.52      |      | -0.32 | 0.78      |      | -0.26 | 0.75  |      | Uncharacterized protein                                                  |
| Pc_TC080414 | 0.83  | 0.23  |      | 0.66  | 0.42      |      | -5.14 | 0         | Down | -5.02 | 0     | Down | Expressed protein                                                        |
| Pc_TC080415 | 1.03  | 0.17  |      | 1.92  | 0.02      | Up   | 1.71  | 0.14      |      | 1.35  | 0.11  |      | Ribosomal L38e protein family                                            |
| Pc_TC080416 | -1.2  | 0.05  | Down | 0.11  | 0.88      |      | 0.21  | 0.85      |      | 0.27  | 0.69  |      | Ribosomal L38e protein family                                            |
| Pc_TC080478 | -0.26 | 0.74  |      | 0.93  | 0.23      |      | -2.74 | 0.04      | Down | -3.21 | 0     | Down | Structure-specific endonuclease subunit SLX1 homolog                     |
| Pc_TC080482 | 1.13  | 0.25  |      | 2.52  | 0.01      | Up   | -2.3  | 0.21      |      | 0.28  | 0.86  |      | P-glycoprotein 21                                                        |
| Pc_TC080498 | -1.36 | 0.05  |      | -1.34 | 0.1       |      | -0.62 | 0.58      |      | -2.16 | 0.01  | Down | Expressed protein                                                        |
| Pc_TC080516 | 0.39  | 0.31  |      | 0.66  | 0.17      |      | -4.51 | 3.36E-005 | Down | -1.73 | 0     | Down | Expressed protein                                                        |
| Pc_TC080519 | -0.98 | 0.23  |      | -2.26 | 0.03      | Down | 0.05  | 0.98      |      | -0.66 | 0.46  |      | Expressed protein                                                        |
| Pc_TC080523 | 0.04  | 1     |      | 1.38  | 0.09      |      | 0     | 0         |      | -3.54 | 0     | Down | Expressed protein                                                        |
| Pc_TC080527 | 2.07  | ##### | Up   | 0     | 2.48E-008 |      | 1.84  | 0.07      |      | 1.2   | 0.08  |      | NADH dehydrogenase 1A                                                    |
| Pc_TC080528 | -4.8  | ##### | Down | -2.5  | 0.01      | Down | -1.33 | 0.28      |      | -4.67 | ##### | Down | Expressed protein                                                        |
| Pc_TC080536 | 1.91  | 0.02  | Up   | 1.41  | 0.14      |      | -2.23 | 0.17      |      | 1.66  | 0.07  |      | Expressed protein                                                        |
| Pc_TC080537 | 0.31  | 0.45  |      | 0.1   | 0.85      |      | -3.28 | 0         | Down | -2.06 | 0     | Down | Expressed protein                                                        |
| Pc_TC080549 | -0.59 | 0.57  |      | 1.06  | 0.25      |      | -0.79 | 0.57      |      | -2.54 | 0.04  | Down | Expressed protein                                                        |
| Pc_TC080553 | -1.33 | 0.05  | Down | -1.22 | 0.12      |      | 0.58  | 0.58      |      | -0.73 | 0.34  |      | Expressed protein                                                        |
| Pc_TC080560 | -1.24 | 0.14  |      | -2    | 0.05      | Down | 0.86  | 0.45      |      | 0.32  | 0.71  |      | Expressed protein                                                        |
| Pc_TC080569 | -3.03 | 0     | Down | -1.37 | 0.18      |      | 0.58  | 0.63      |      | 0.03  | 1     |      | Pupative polyprotein                                                     |
| Pc_TC080574 | -1.14 | 0.05  | Down | -1.43 | 0.04      | Down | 0.93  | 0.35      |      | -0.26 | 0.7   |      | Expressed protein                                                        |
| Pc_TC080583 | 0.23  | 0.7   |      | 0.67  | 0.32      |      | -2.3  | 0.05      | Down | -0.78 | 0.3   |      | Expressed protein                                                        |
| Pc_TC080594 | -4.01 | ##### | Down | -2.71 | 0.01      | Down | -0.01 | 1         |      | -0.4  | 0.64  |      | Expressed protein                                                        |
| Pc_TC080595 | 2.47  | 0     | Up   | 0.36  | 0.73      |      | 2.47  | 0.03      | Up   | 3.26  | ##### | Up   | Expressed protein                                                        |
| Pc_TC080619 | 0.28  | 0.63  |      | 0.51  | 0.44      |      | -2.67 | 0.02      | Down | -1.35 | 0.07  |      | Expressed protein                                                        |
| Pc_TC080631 | 0.19  | 0.76  |      | 0.57  | 0.4       |      | -3.39 | 0.01      | Down | -1.74 | 0.03  | Down | OSJNBa0035M09.1 protein                                                  |
| Pc_TC080633 | 0.14  | 0.86  |      | 0.1   | 0.92      |      | -1.9  | 0.12      |      | -2.34 | 0.01  | Down | Expressed protein                                                        |
| Pc_TC080640 | -1.14 | 0.11  |      | 0.31  | 0.69      |      | -0.98 | 0.39      |      | -1.68 | 0.05  | Down | Expressed protein                                                        |
| Pc_TC080644 | 0.25  | 0.64  |      | 0.55  | 0.38      |      | -2.1  | 0.06      |      | -1.54 | 0.03  | Down | Expressed protein                                                        |
| Pc_TC080650 | -2.06 | 0.01  | Down | -0.88 | 0.28      |      | 1.15  | 0.28      |      | 0.25  | 0.75  |      | Ubiquitin carboxyl-terminal hydrolase                                    |
| Pc_TC080655 | 0.33  | 0.51  |      | 0.82  | 0.16      |      | -2.59 | 0.02      | Down | 0.02  | 0.99  |      | Expressed protein                                                        |
| Pc_TC080660 | -1.71 | 0.01  | Down | -0.99 | 0.19      |      | 0.85  | 0.42      |      | 0.33  | 0.65  |      | Uncharacterized protein                                                  |
| Pc_TC080668 | -0.9  | 0.17  |      | -1.63 | 0.04      | Down | 1.1   | 0.29      |      | 0.63  | 0.38  |      | Putative uncharacterized protein P0705E11.12                             |
| Pc_TC080687 | -0.38 | 0.48  |      | -0.82 | 0.21      |      | 1.91  | 0.05      | Up   | 0.98  | 0.12  |      | Expressed protein                                                        |
| Pc_TC080695 | 0     | ##### |      | -5.9  | 3.23E-007 | Down | 0     | 2.67E-006 |      | 0     | ##### |      | Uncharacterized protein                                                  |
| Pc_TC080697 | -2.38 | 0.06  |      | -4.4  | 0.01      | Down | -0.79 | 0.6       |      | -1.66 | 0.17  |      | 3'-5' exonuclease domain-containing protein                              |
| Pc_TC080705 | -0.07 | 0.92  |      | -0.24 | 0.74      |      | 1.49  | 0.14      |      | 1.3   | 0.05  | Up   | Expressed protein                                                        |
| Pc_TC080706 | 0.79  | 0.18  |      | 0.64  | 0.37      |      | -2.4  | 0.05      | Down | -1.09 | 0.17  |      | Expressed protein                                                        |
| Pc_TC080707 | -0.02 | 0.99  |      | 1.04  | 0.12      |      | -2.61 | 0.03      | Down | -0.9  | 0.24  |      | Expressed protein                                                        |
| Pc_TC080713 | 0.26  | 0.42  |      | -0.06 | 0.89      |      | -2.26 | 0.01      | Down | -1.32 | 0.01  | Down | aldehyde dehydrogenase 12A1                                              |
| Pc_TC080715 | 0.53  | 0.08  |      | 0.46  | 0.23      |      | -2.03 | 0.02      | Down | -0.88 | 0.08  |      | aldehyde dehydrogenase 12A1                                              |
| Pc_TC080717 | 0.63  | 0.08  |      | 1.32  | 0         | Up   | -2.61 | 0.01      | Down | -0.79 | 0.16  |      | aldehyde dehydrogenase 12A1                                              |
| Pc_TC080718 | 0.14  | 0.69  |      | -0.43 | 0.34      |      | -1.97 | 0.03      | Down | -2.25 | ##### | Down | aldehyde dehydrogenase 12A1                                              |
| Pc_TC080719 | -0.16 | 0.65  |      | -0.1  | 0.83      |      | -2.01 | 0.03      | Down | -0.07 | 0.9   |      | aldehyde dehydrogenase 12A1                                              |
| Pc_TC080720 | 0.06  | 0.87  |      | 0.3   | 0.49      |      | -3.03 | 0         | Down | -1.16 | 0.03  | Down | aldehyde dehydrogenase 12A1                                              |
| Pc_TC080721 | 0.45  | 0.18  |      | -0.39 | 0.38      |      | -3.17 | 0         | Down | -2.32 | ##### | Down | aldehyde dehydrogenase 12A1                                              |
| Pc_TC080727 | 1.72  | 0     | Up   | 0     | 1.48E-010 |      | 2.19  | 0.03      | Up   | -0.15 | 0.84  |      | Zn-dependent exopeptidases superfamily protein                           |
| Pc_TC080740 | 3.04  | ##### | Up   | 0     | 0.01      |      | 2.77  | 0.02      | Up   | 1.1   | 0.27  |      | Ribosomal protein S25 family protein                                     |
| Pc_TC080753 | 3.17  | ##### | Up   | 0     | 0.02      |      | 1.48  | 0.26      |      | -0.05 | 1     |      | AAA-type ATPase family protein                                           |
| Pc_TC080763 | 0.24  | 0.71  |      | 0.62  | 0.38      |      | -4.39 | 0         | Down | -2.49 | 0     | Down | Expressed protein                                                        |
| Pc_TC080783 | -1.78 | 0     | Down | -1.95 | 0.01      | Down | 1.28  | 0.19      |      | -0.71 | 0.29  |      | Expressed protein                                                        |
| Pc_TC080796 | 2.14  | 0     | Up   | 0     | 6.03E-006 |      | 1.46  | 0.18      |      | 0.31  | 0.71  |      | ATPase,F1 complex,alpha subunit protein                                  |
| Pc_TC080815 | 0.37  | 0.43  |      | -1.56 | 0.02      | Down | 1.25  | 0.18      |      | 0.7   | 0.25  |      | Expressed protein                                                        |
| Pc_TC080821 | -0.81 | 0.45  |      | -3.53 | 0.02      | Down | 0.53  | 0.7       |      | 0.53  | 0.6   |      | P-loop containing nucleoside triphosphate hydrolases superfamily protein |
| Pc_TC080826 | -0.62 | 0.29  |      | 0.05  | 0.95      |      | -2.61 | 0.02      | Down | -1.12 | 0.13  |      | Expressed protein                                                        |
| Pc_TC080838 | -0.34 | 0.35  |      | -1.56 | 0         | Down | -0.35 | 0.68      |      | -0.23 | 0.67  |      | Uncharacterized protein                                                  |
| Pc_TC080842 | -0.88 | 0.35  |      | 1.08  | 0.21      |      | -2.54 | 0.08      |      | -3.83 | 0     | Down | Expressed protein                                                        |
| Pc_TC080843 | 2.71  | 0     | Up   | 2.76  | 0.01      | Up   | -1.23 | 0.53      |      | 0.55  | 0.71  |      | Expressed protein                                                        |
| Pc_TC080844 | -0.15 | 0.84  |      | -0.15 | 0.86      |      | -3.1  | 0.01      | Down | -2.39 | 0.01  | Down | Expressed protein                                                        |
| Pc_TC080849 | 1.58  | 0.01  | Up   | 1.7   | 0.02      | Up   | 0.89  | 0.42      |      | -0.08 | 0.94  |      | Expressed protein                                                        |



|             |       |       |      |       |           |      |       |           |      |       |       |      |                                                                               |     |
|-------------|-------|-------|------|-------|-----------|------|-------|-----------|------|-------|-------|------|-------------------------------------------------------------------------------|-----|
| Pc_TC080867 | -4.57 | 0     | Down | -1.26 | 0.3       |      | 0.38  | 0.79      |      | -0.7  | 0.53  |      | actin binding                                                                 |     |
| Pc_TC080868 | -3.92 | 0.03  | Down | 0     | 0.02      |      | -1.69 | 0.32      |      | -3.37 | 0.04  | Down | Expressed protein                                                             |     |
| Pc_TC080875 | -3.44 | ##### | Down | -0.15 | 0.84      |      | -2.67 | 0.02      | Down | -1.31 | 0.09  |      | Expressed protein                                                             |     |
| Pc_TC080880 | -0.19 | 0.74  |      | -1.43 | 0.04      | Down | 0.42  | 0.68      |      | 0.47  | 0.48  |      | Expressed protein                                                             |     |
| Pc_TC080887 | 2.82  | 0     | Up   | 2.69  | 0.01      | Up   | 3.08  | 0.02      | Up   | 2.28  | 0.03  | Up   | Expressed protein                                                             |     |
| Pc_TC080896 | -0.74 | 0.21  |      | -0.7  | 0.32      |      | -2.23 | 0.05      | Down | -1.58 | 0.03  | Down | Expressed protein                                                             |     |
| Pc_TC080904 | 0.44  | 0.56  |      | 0.23  | 0.81      |      | 1.63  | 0.14      |      | 1.82  | 0.02  | Up   | Expressed protein                                                             |     |
| Pc_TC080915 | 0.62  | 0.28  |      | 0.72  | 0.29      |      | -2.62 | 0.03      | Down | -1.31 | 0.09  |      | Expressed protein                                                             |     |
| Pc_TC080920 | 0.13  | 0.93  |      | 0.61  | 0.55      |      | 0     | 0         |      | -4.08 | 0.01  | Down | Expressed protein                                                             |     |
| Pc_TC080937 | 0.68  | 0.45  |      | -0.77 | 0.53      |      | 2.16  | 0.07      |      | 1.95  | 0.02  | Up   | hAT transposon superfamily protein                                            |     |
| Pc_TC080938 | 0.82  | 0.25  |      | -0.51 | 0.59      |      | 2.55  | 0.02      | Up   | 2.21  | 0     | Up   | hAT dimerisation domain-containing protein                                    |     |
| Pc_TC080939 | -2.4  | ##### | Down | -0.96 | 0.14      |      | 1.09  | 0.26      |      | 0.19  | 0.78  |      | hAT dimerisation domain-containing protein                                    |     |
| Pc_TC080947 | 1.12  | 0.05  | Up   | 0.03  | 0.98      |      | -1.66 | 0.15      |      | -0.37 | 0.62  |      | Mitochondrial import inner membrane translocase subunit family protein        |     |
| Pc_TC080950 | -0.49 | 0.43  |      | -0.21 | 0.77      |      | -2.87 | 0.02      | Down | -1.62 | 0.04  | Down | Expressed protein                                                             |     |
| Pc_TC080956 | -2.32 | 0     | Down | -0.31 | 0.65      |      | -1.07 | 0.31      |      | -2.77 | 0     | Down | Expressed protein                                                             |     |
| Pc_TC080971 | 0.18  | 0.75  |      | 0     | 6.16E-010 |      | 0.11  | 0.92      |      | -2.32 | 0     | Down | Expressed protein                                                             |     |
| Pc_TC080972 | -0.1  | 0.94  |      | 0.33  | 0.74      |      | -1.19 | 0.38      |      | -2.46 | 0.03  | Down | H0512B01.8 protein                                                            |     |
| Pc_TC080978 | -0.21 | 0.69  |      | -0.35 | 0.59      |      | -2.73 | 0.01      | Down | -0.21 | 0.76  |      | Expressed protein                                                             |     |
| Pc_TC080990 | 0.24  | 0.8   |      | 0.41  | 0.68      |      | -3.54 | 0.03      | Down | -2.42 | 0.03  | Down | Expressed protein                                                             |     |
| Pc_TC080993 | -2.24 | 0.01  | Down | -1.08 | 0.24      |      | -0.47 | 0.7       |      | -0.07 | 0.96  |      | Expressed protein                                                             |     |
| Pc_TC080995 | 0.82  | 0.25  |      | 0.72  | 0.38      |      | -2.85 | 0.04      | Down | -0.51 | 0.58  |      | Putative uncharacterized protein                                              |     |
| Pc_TC080996 | -3.17 | 0.04  | Down | 0.57  | 0.62      |      | 1.01  | 0.45      |      | -0.16 | 0.93  |      | Expressed protein                                                             |     |
| Pc_TC080997 | 0.07  | 0.93  |      | 0.57  | 0.41      |      | -2.47 | 0.04      | Down | -1.87 | 0.02  | Down | Expressed protein                                                             |     |
| Pc_TC081003 | 1.08  | 0.57  |      | 1.23  | 0.53      |      | 3.55  | 0.02      | Up   | 1.33  | 0.44  |      | Expressed protein                                                             |     |
| Pc_TC081007 | 1.3   | 0.08  |      | 1.97  | 0.02      | Up   | -2.23 | 0.13      |      | 0     | 1     |      | Expressed protein                                                             |     |
| Pc_TC081011 | 0.23  | 0.72  |      | -1.26 | 0.11      |      | 0.77  | 0.46      |      | 1.71  | 0.01  | Up   | Expressed protein                                                             |     |
| Pc_TC081012 | 2.09  | 0     | Up   | 0     | 5.31E-006 |      | 2.07  | 0.05      |      | 0.82  | 0.28  |      | Major facilitator superfamily protein                                         |     |
| Pc_TC081043 | 0.29  | 0.57  |      | 0.88  | 0.14      |      | -3.97 | 0         | Down | -1.32 | 0.06  |      | Expressed protein                                                             |     |
| Pc_TC081046 | 0.36  | 0.54  |      | 0.28  | 0.69      |      | -2.67 | 0.02      | Down | -1.5  | 0.05  |      | Expressed protein                                                             |     |
| Pc_TC081048 | 0.15  | 0.88  |      | 1.67  | 0.03      | Up   | -3.3  | 0.03      | Down | -0.18 | 0.86  |      | Expressed protein                                                             |     |
| Pc_TC081053 | -3.83 | 0.04  | Down | -1.26 | 0.4       |      | -2.08 | 0.24      |      | -0.96 | 0.48  |      | Expressed protein                                                             |     |
| Pc_TC081061 | 3.99  | 0.03  | Up   | 4.58  | 0.01      | Up   | 0     | 0.87      |      | 1.21  | 0.89  |      | recovery protein 3                                                            |     |
| Pc_TC081063 | -0.56 | 0.58  |      | -0.29 | 0.81      |      | -1.22 | 0.39      |      | -2.37 | 0.05  | Down | recovery protein 3                                                            |     |
| Pc_TC081068 | -2.31 | 0     | Down | -1.77 | 0.03      | Down | -2.07 | 0.08      |      | -2.2  | 0.01  | Down | Signal peptidase complex subunit 3                                            |     |
| Pc_TC081076 | -0.26 | 0.71  |      | -0.65 | 0.42      |      | 2.21  | 0.03      | Up   | 1.03  | 0.15  |      | Expressed protein                                                             |     |
| Pc_TC081080 | 0.17  | 0.82  |      | 0.55  | 0.46      |      | -2.61 | 0.04      | Down | -2.75 | 0     | Down | Expressed protein                                                             |     |
| Pc_TC081082 | 0.5   | 0.42  |      | 0.61  | 0.4       |      | -3.1  | 0.01      | Down | -0.69 | 0.38  |      | Expressed protein                                                             |     |
| Pc_TC081089 | 0.56  | 0.36  |      | 1.58  | 0.02      | Up   | -2.94 | 0.02      | Down | -0.3  | 0.7   |      | Expressed protein                                                             |     |
| Pc_TC081092 | 0.65  | 0.22  |      | 0.88  | 0.16      |      | -4.72 | 0         | Down | -3.45 | ##### | Down | Expressed protein                                                             |     |
| Pc_TC081101 | -1.11 | 0.4   |      | -0.04 | 1         |      | -3.5  | 0.08      |      | -4.37 | 0.02  | Down | Expressed protein                                                             |     |
| Pc_TC081103 | 0.5   | 0.11  |      | 0.34  | 0.41      |      | -2.23 | 0.01      | Down | -1.69 | 0     | Down | Expressed protein                                                             |     |
| Pc_TC081104 | -0.92 | 0.17  |      | 1.06  | 0.12      |      | -5.2  | 0         | Down | -4.08 | ##### | Down | Expressed protein                                                             |     |
| Pc_TC081110 | 0.63  | 0.4   |      | 0.68  | 0.43      |      | -2.85 | 0.05      | Down | -1.92 | 0.06  |      | Expressed protein                                                             |     |
| Pc_TC081139 | -0.84 | 0.51  |      | -0.57 | 0.69      |      | 3     | 0.01      | Up   | 1.15  | 0.25  |      | cysteine-rich RLK (RECEPTOR-like protein kinase) 8                            |     |
| Pc_TC081148 | -0.01 | 1     |      | 0.57  | 0.42      |      | -1.98 | 0.09      |      | -2.23 | 0.01  | Down | Expressed protein                                                             |     |
| Pc_TC081151 | 1.04  | 0.11  |      | 1.55  | 0.04      | Up   | -3.3  | 0.02      | Down | -2.6  | 0.01  | Down | Expressed protein                                                             |     |
| Pc_TC081155 | 0.32  | 0.74  |      | 0.25  | 0.83      |      | -2.98 | 0.06      |      | -3.18 | 0.01  | Down | Expressed protein                                                             |     |
| Pc_TC081173 | -0.25 | 0.58  |      | 0     | 1         |      | -1.02 | 0.29      |      | -1.43 | 0.02  | Down | Expressed protein                                                             |     |
| Pc_TC081176 | -0.6  | 0.26  |      | -0.68 | 0.28      |      | 2.27  | 0.02      | Up   | 0.72  | 0.25  |      | Expressed protein                                                             |     |
| Pc_TC081193 | 0.07  | 0.87  |      | 0.9   | 0.07      |      | -8.01 | 4.42E-009 | Down | -3.53 | ##### | Down | Uncharacterized protein                                                       |     |
| Pc_TC081209 | 0.19  | 0.66  |      | 0.7   | 0.17      |      | -1.82 | 0.06      |      | -1.54 | 0.01  | Down | Expressed protein                                                             |     |
| Pc_TC081222 | -3.09 | 0.04  | Down | -1.53 | 0.28      |      | -1.34 | 0.4       |      | -1.37 | 0.29  |      | Expressed protein                                                             |     |
| Pc_TC081230 | -0.89 | 0.3   |      | 0.88  | 0.29      |      | -2.92 | 0.04      | Down | -1.63 | 0.1   |      | Expressed protein                                                             |     |
| Pc_TC081234 | 3.25  | 0.03  | Up   | 1.06  | 0.8       |      | 2.75  | 0.18      |      | 2.87  | 0.09  |      | NAC (No Apical Meristem) domain transcriptional regulator superfamily protein | NAC |
| Pc_TC081263 | -0.34 | 0.32  |      | -0.89 | 0.05      |      | 1.02  | 0.22      |      | 1.47  | 0     | Up   | Leucine-rich repeat protein kinase family protein                             |     |
| Pc_TC081273 | -0.21 | 0.77  |      | -0.38 | 0.64      |      | -4.89 | 0         | Down | -2.24 | 0.01  | Down | Expressed protein                                                             |     |
| Pc_TC081278 | 0.68  | 0.3   |      | 1.08  | 0.14      |      | -0.54 | 0.65      |      | -1.86 | 0.04  | Down | Expressed protein                                                             |     |
| Pc_TC081291 | -1.24 | 0.19  |      | 0.18  | 0.88      |      | -2.63 | 0.07      |      | -2.5  | 0.03  | Down | Expressed protein                                                             |     |
| Pc_TC081293 | 0.74  | 0.19  |      | 0.95  | 0.15      |      | -4.03 | 0         | Down | -2.06 | 0.01  | Down | Expressed protein                                                             |     |
| Pc_TC081298 | -0.06 | 0.94  |      | 0.67  | 0.33      |      | -3.29 | 0.01      | Down | -3.26 | 0     | Down | Expressed protein                                                             |     |
| Pc_TC081304 | 0.45  | 0.55  |      | 1.44  | 0.06      |      | -3.5  | 0.02      | Down | -0.79 | 0.39  |      | Putative uncharacterized protein                                              |     |
| Pc_TC081314 | 0.22  | 0.69  |      | -0.67 | 0.33      |      | -2.06 | 0.06      |      | -1.52 | 0.04  | Down | Expressed protein                                                             |     |

|             |       |       |      |       |           |      |  |       |      |      |  |       |       |      |                                                                                             |
|-------------|-------|-------|------|-------|-----------|------|--|-------|------|------|--|-------|-------|------|---------------------------------------------------------------------------------------------|
| Pc_TC081321 | -2.15 | 0.02  | Down | -1.5  | 0.13      |      |  | -1.59 | 0.22 |      |  | -0.93 | 0.32  |      | Expressed protein                                                                           |
| Pc_TC081324 | -0.37 | 0.47  |      | 0.02  | 0.97      |      |  | -1.83 | 0.08 |      |  | -1.52 | 0.03  | Down | Expressed protein                                                                           |
| Pc_TC081325 | -0.19 | 0.81  |      | -0.21 | 0.82      |      |  | -1.83 | 0.15 |      |  | -1.84 | 0.05  | Down | Expressed protein                                                                           |
| Pc_TC081327 | 0.7   | 0.42  |      | 1.7   | 0.05      |      |  | 0     | 0    |      |  | -2.96 | 0.03  | Down | Expressed protein                                                                           |
| Pc_TC081330 | 0.14  | 0.73  |      | 0.48  | 0.35      |      |  | -2.57 | 0.01 | Down |  | -1.36 | 0.03  | Down | Expressed protein                                                                           |
| Pc_TC081334 | -2.14 | 0.03  | Down | -1.63 | 0.12      |      |  | 0.63  | 0.6  |      |  | -0.31 | 0.75  |      | Uncharacterized protein                                                                     |
| Pc_TC081339 | -1.51 | 0.03  | Down | -1.7  | 0.04      | Down |  | 1.53  | 0.14 |      |  | 0.28  | 0.71  |      | Expressed protein                                                                           |
| Pc_TC081345 | -4.09 | 0.02  | Down | -4.11 | 0.03      | Down |  | -0.76 | 0.63 |      |  | -2.54 | 0.08  |      | Expressed protein                                                                           |
| Pc_TC081346 | 4.66  | 0     | Up   | 3.87  | 0.06      |      |  | 2.5   | 0.42 |      |  | 2.8   | 0.26  |      | Expressed protein                                                                           |
| Pc_TC081347 | 1.49  | 0.44  |      | 1.64  | 0.41      |      |  | 3.38  | 0.04 | Up   |  | 0.63  | 0.88  |      | Expressed protein                                                                           |
| Pc_TC081352 | 1.44  | 0.11  |      | 2.67  | 0         | Up   |  | 0.36  | 0.83 |      |  | 0.02  | 1     |      | Expressed protein                                                                           |
| Pc_TC081359 | -0.56 | 0.51  |      | 0.42  | 0.64      |      |  | 1.78  | 0.11 |      |  | 1.63  | 0.04  | Up   | pentatricopeptide (PPR) repeat-containing protein                                           |
| Pc_TC081361 | -0.79 | 0.32  |      | -3.08 | 0.01      | Down |  | 0.8   | 0.48 |      |  | 0.05  | 0.98  |      | pentatricopeptide (PPR) repeat-containing protein                                           |
| Pc_TC081379 | -1.49 | 0.03  | Down | -0.98 | 0.21      |      |  | 1.79  | 0.08 |      |  | 0.92  | 0.19  |      | Expressed protein                                                                           |
| Pc_TC081385 | -1.19 | 0.06  |      | -1.55 | 0.04      | Down |  | 1.4   | 0.17 |      |  | 0.61  | 0.37  |      | P-loop containing nucleoside triphosphate hydrolases superfamily protein                    |
| Pc_TC081391 | 2.09  | 0     | Up   | 0     | 0         |      |  | 1.86  | 0.11 |      |  | -0.47 | 0.65  |      | tubulin beta-1 chain                                                                        |
| Pc_TC081392 | 0.14  | 0.77  |      | 0.62  | 0.26      |      |  | -1.93 | 0.06 |      |  | -1.31 | 0.04  | Down | Transducin/WD40 repeat-like superfamily protein                                             |
| Pc_TC081394 | -0.46 | 0.51  |      | 0     | 1         |      |  | -1.73 | 0.15 |      |  | -2.7  | 0     | Down | Putative uncharacterized protein OSJNBa0081P02.14                                           |
| Pc_TC081399 | -0.54 | 0.38  |      | -1.65 | 0.03      | Down |  | 1.65  | 0.1  |      |  | 0.87  | 0.2   |      | Expressed protein                                                                           |
| Pc_TC081401 | -0.14 | 0.94  |      | 0.13  | 0.95      |      |  | -2.3  | 0.15 |      |  | -4.77 | 0.01  | Down | Expressed protein                                                                           |
| Pc_TC081409 | 0.11  | 0.88  |      | 0.62  | 0.4       |      |  | -3.43 | 0.01 | Down |  | -1.12 | 0.17  |      | Uncharacterized protein                                                                     |
| Pc_TC081410 | 1.62  | 0     | Up   | 0     | 1.92E-007 |      |  | 1.92  | 0.07 |      |  | 1.29  | 0.07  |      | Expressed protein                                                                           |
| Pc_TC081412 | 0.3   | 0.59  |      | 0.76  | 0.23      |      |  | -2.56 | 0.03 | Down |  | -1.93 | 0.01  | Down | Expressed protein                                                                           |
| Pc_TC081416 | 0.07  | 0.91  |      | 0.16  | 0.82      |      |  | -1.55 | 0.16 |      |  | -1.77 | 0.02  | Down | Expressed protein                                                                           |
| Pc_TC081420 | 0.5   | 0.38  |      | 0.61  | 0.36      |      |  | 1.62  | 0.11 |      |  | 1.49  | 0.03  | Up   | Transcription factor jumonji (jnj) family protein / zinc finger (C5HC2 type) family protein |
| Pc_TC081421 | -1.26 | 0.07  |      | -1.17 | 0.14      |      |  | -1.3  | 0.25 |      |  | -2.33 | 0.01  | Down | Transcription factor jumonji (jnj) family protein / zinc finger (C5HC2 type) family protein |
| Pc_TC081426 | 1.03  | 0.14  |      | 1.35  | 0.09      |      |  | -2.37 | 0.08 |      |  | -2.25 | 0.03  | Down | Expressed protein                                                                           |
| Pc_TC081430 | 1.12  | 0     | Up   | 0     | 1.42E-021 |      |  | 1.24  | 0.16 |      |  | -0.02 | 0.97  |      | CONTAINS InterPro DOMAIN/s: Prefoldin (InterPro:IPR009053)                                  |
| Pc_TC081431 | 0.06  | 0.94  |      | 1.26  | 0.07      |      |  | -3.03 | 0.02 | Down |  | -2.65 | 0     | Down | Os03g0168400 protein                                                                        |
| Pc_TC081435 | 0.08  | 0.88  |      | 0.54  | 0.37      |      |  | -2.89 | 0.01 | Down |  | -1.12 | 0.1   |      | Putative uncharacterized protein                                                            |
| Pc_TC081437 | -0.36 | 0.78  |      | -4.19 | 0.03      | Down |  | -0.29 | 0.87 |      |  | -0.23 | 0.88  |      | Expressed protein                                                                           |
| Pc_TC081449 | 0.59  | 0.5   |      | -1.83 | 0.14      |      |  | 1.94  | 0.1  |      |  | 1.9   | 0.02  | Up   | Expressed protein                                                                           |
| Pc_TC081453 | -0.8  | 0.3   |      | 0.44  | 0.59      |      |  | -6.38 | 0    | Down |  | -0.9  | 0.3   |      | Expressed protein                                                                           |
| Pc_TC081455 | 1.42  | 0.01  | Up   | 1.41  | 0.03      | Up   |  | -1.93 | 0.1  |      |  | 0.47  | 0.53  |      | Expressed protein                                                                           |
| Pc_TC081456 | -0.18 | 0.73  |      | -0.01 | 0.99      |      |  | -2.83 | 0.01 | Down |  | -0.43 | 0.51  |      | Expressed protein                                                                           |
| Pc_TC081457 | 0.28  | 0.52  |      | 0.14  | 0.8       |      |  | -3.12 | 0    | Down |  | -0.81 | 0.19  |      | Expressed protein                                                                           |
| Pc_TC081458 | 0.41  | 0.32  |      | 0.33  | 0.53      |      |  | -3.08 | 0    | Down |  | -0.09 | 0.88  |      | Expressed protein                                                                           |
| Pc_TC081459 | 0.48  | 0.16  |      | 0.58  | 0.19      |      |  | -2.9  | 0    | Down |  | -0.03 | 0.96  |      | cysteine-rich RLK (RECEPTOR-like protein kinase) 8                                          |
| Pc_TC081481 | 3.1   | 0     | Up   | 2.61  | 0.02      | Up   |  | 0.6   | 0.78 |      |  | 1.72  | 0.16  |      | Expressed protein                                                                           |
| Pc_TC081492 | -2.16 | 0.01  | Down | -2.35 | 0.01      | Down |  | -2.51 | 0.04 | Down |  | -0.63 | 0.43  |      | S-locus lectin protein kinase family protein                                                |
| Pc_TC081495 | 1.51  | 0.03  | Up   | 0.46  | 0.63      |      |  | 1.52  | 0.19 |      |  | 1.49  | 0.07  |      | S-locus lectin protein kinase family protein                                                |
| Pc_TC081513 | -0.61 | 0.33  |      | -0.35 | 0.63      |      |  | -2.7  | 0.02 | Down |  | -3.48 | ##### | Down | Uncharacterized protein                                                                     |
| Pc_TC081527 | -0.4  | 0.65  |      | 0.77  | 0.37      |      |  | -2.61 | 0.07 |      |  | -2.66 | 0.02  | Down | Expressed protein                                                                           |
| Pc_TC081546 | 2.08  | 0.54  |      | 3.23  | 0.18      |      |  | 4.2   | 0.05 |      |  | 4.15  | 0.02  | Up   | Expressed protein                                                                           |
| Pc_TC081553 | 1.89  | ##### | Up   | 0     | 1.48E-010 |      |  | 1.35  | 0.17 |      |  | -0.07 | 0.93  |      | ribosomal protein 5B                                                                        |
| Pc_TC081560 | 0.27  | 0.69  |      | 0.72  | 0.33      |      |  | -4.2  | 0    | Down |  | -2.34 | 0.01  | Down | Calponin                                                                                    |
| Pc_TC081567 | -0.34 | 0.71  |      | -0.18 | 0.88      |      |  | -0.5  | 0.7  |      |  | -2.11 | 0.04  | Down | Expressed protein                                                                           |
| Pc_TC081573 | 0.25  | 0.58  |      | 0.45  | 0.42      |      |  | -1.46 | 0.15 |      |  | -1.7  | 0.01  | Down | Expressed protein                                                                           |
| Pc_TC081574 | 0.34  | 0.49  |      | 0.89  | 0.12      |      |  | -2.23 | 0.04 | Down |  | -1.13 | 0.09  |      | Expressed protein                                                                           |
| Pc_TC081586 | 0.22  | 0.72  |      | -0.38 | 0.61      |      |  | -3.47 | 0.01 | Down |  | -0.2  | 0.79  |      | Expressed protein                                                                           |
| Pc_TC081591 | 1.5   | 0.02  | Up   | -1.13 | 0.22      |      |  | 1.55  | 0.16 |      |  | 1.12  | 0.14  |      | Uncharacterized protein                                                                     |
| Pc_TC081596 | 0.38  | 0.29  |      | 0.73  | 0.1       |      |  | -2.21 | 0.02 | Down |  | -1.04 | 0.06  |      | Uncharacterized protein                                                                     |
| Pc_TC081598 | -0.07 | 0.88  |      | 0.43  | 0.45      |      |  | -3.46 | 0    | Down |  | -2.16 | 0     | Down | Expressed protein                                                                           |
| Pc_TC081605 | 1.74  | 0     | Up   | 0     | 1.72E-009 |      |  | 1.47  | 0.15 |      |  | -0.02 | 0.98  |      | glutamate dehydrogenase 1                                                                   |
| Pc_TC081608 | -1.92 | 0.01  | Down | -1.87 | 0.04      | Down |  | -1.54 | 0.2  |      |  | -2.3  | 0.01  | Down | Expressed protein                                                                           |
| Pc_TC081612 | -0.49 | 0.29  |      | -2.67 | 3.14E-005 | Down |  | 2.1   | 0.02 | Up   |  | 1.4   | 0.01  | Up   | Leucine-rich repeat protein kinase family protein                                           |
| Pc_TC081614 | 0.54  | 0.22  |      | 1.08  | 0.04      | Up   |  | -3.02 | 0    | Down |  | -2.14 | 0     | Down | Uncharacterized protein                                                                     |
| Pc_TC081623 | 0.44  | 0.33  |      | 0.67  | 0.22      |      |  | -4.46 | 0    | Down |  | -2.1  | 0     | Down | Expressed protein                                                                           |
| Pc_TC081626 | -2.3  | 0     | Down | -1.82 | 0.01      | Down |  | 1.31  | 0.17 |      |  | -0.66 | 0.32  |      | cysteine-rich RLK (RECEPTOR-like protein kinase) 8                                          |
| Pc_TC081663 | -0.39 | 0.56  |      | 0.55  | 0.44      |      |  | -2.3  | 0.05 |      |  | -2.08 | 0.01  | Down | Expressed protein                                                                           |
| Pc_TC081670 | -1    | 0.1   |      | -2.41 | 0         | Down |  | 0.54  | 0.6  |      |  | -0.18 | 0.8   |      | Expressed protein                                                                           |
| Pc_TC081674 | -0.35 | 0.68  |      | 1.16  | 0.14      |      |  | -1.35 | 0.29 |      |  | -2.93 | 0.01  | Down | Expressed protein                                                                           |

|             |       |       |      |       |           |      |       |           |      |       |       |      |                                                              |
|-------------|-------|-------|------|-------|-----------|------|-------|-----------|------|-------|-------|------|--------------------------------------------------------------|
| Pc_TC081685 | 0.18  | 0.71  |      | 1.31  | 0.02      | Up   | -3.29 | 0         | Down | -0.74 | 0.26  |      | Expressed protein                                            |
| Pc_TC081747 | -4.01 | 0.02  | Down | -2.44 | 0.12      |      | -3.58 | 0.07      |      | 0     | 0     |      | Expressed protein                                            |
| Pc_TC081751 | -0.22 | 0.81  |      | -0.46 | 0.64      |      | 2.52  | 0.02      | Up   | 1.47  | 0.06  |      | Expressed protein                                            |
| Pc_TC081753 | -0.18 | 0.83  |      | 0.95  | 0.21      |      | -3.28 | 0.02      | Down | -1.57 | 0.08  |      | Expressed protein                                            |
| Pc_TC081759 | 0.49  | 0.37  |      | 1.29  | 0.04      | Up   | -3.05 | 0.01      | Down | -2.56 | 0     | Down | Expressed protein                                            |
| Pc_TC081768 | -1.41 | 0.01  | Down | -1.7  | 0.01      | Down | 2.06  | 0.03      | Up   | -0.01 | 0.99  |      | Expressed protein                                            |
| Pc_TC081771 | 2.94  | 0.01  | Up   | 0     | 0.36      |      | 2.15  | 0.22      |      | 0.21  | 1     |      | Uncharacterized protein                                      |
| Pc_TC081772 | 0.08  | 1     |      | 2.87  | 0.03      | Up   | 0.31  | 0.99      |      | -1.37 | 0.66  |      | ferric reduction oxidase 5                                   |
| Pc_TC081782 | 1.08  | 0.43  |      | 0.84  | 0.61      |      | 3.16  | 0.02      | Up   | 2.31  | 0.04  | Up   | Leucine-rich repeat protein kinase family protein            |
| Pc_TC081787 | -3.24 | 0.03  | Down | -0.68 | 0.6       |      | 1.43  | 0.26      |      | 1.03  | 0.29  |      | Expressed protein                                            |
| Pc_TC081788 | -2.73 | 0.02  | Down | 0     | 0         |      | -1.84 | 0.21      |      | -0.66 | 0.54  |      | Expressed protein                                            |
| Pc_TC081789 | 0.67  | 0.29  |      | 1.05  | 0.14      |      | -1.94 | 0.11      |      | -2.68 | 0     | Down | Expressed protein                                            |
| Pc_TC081794 | 0.26  | 0.54  |      | 0.53  | 0.31      |      | -2.65 | 0.01      | Down | -1.62 | 0.01  | Down | Expressed protein                                            |
| Pc_TC081806 | 0.13  | 0.79  |      | 0.89  | 0.1       |      | -3.07 | 0         | Down | -1.97 | 0     | Down | Putative uncharacterized protein Sb09g001330                 |
| Pc_TC081810 | -1.45 | 0.03  | Down | -1.86 | 0.02      | Down | 1.36  | 0.19      |      | 0.56  | 0.43  |      | Expressed protein                                            |
| Pc_TC081819 | -0.84 | 0.13  |      | -2.64 | 0         | Down | 1.34  | 0.17      |      | 0.71  | 0.27  |      | Expressed protein                                            |
| Pc_TC081825 | -3.09 | 0.01  | Down | -1.11 | 0.29      |      | -0.54 | 0.69      |      | -1.46 | 0.16  |      | Expressed protein                                            |
| Pc_TC081843 | 2.47  | ##### | Up   | 0     | 6.30E-005 |      | 2.69  | 0.01      | Up   | -0.31 | 0.74  |      | Expressed protein                                            |
| Pc_TC081849 | -0.02 | 0.98  |      | -0.31 | 0.68      |      | 0.59  | 0.58      |      | 1.34  | 0.05  | Up   | Expressed protein                                            |
| Pc_TC081853 | 3.25  | ##### | Up   | 0     | 0.02      |      | 2.04  | 0.12      |      | 1.52  | 0.13  |      | cytochrome P450, family 711, subfamily A, polypeptide 1      |
| Pc_TC081874 | -0.07 | 0.88  |      | -0.33 | 0.57      |      | -9.35 | 6.36E-009 | Down | -5.76 | ##### | Down | Expressed protein                                            |
| Pc_TC081880 | 0.69  | 0.17  |      | 0.65  | 0.29      |      | -1.88 | 0.08      |      | -2.04 | 0.01  | Down | Expressed protein                                            |
| Pc_TC081883 | 0.15  | 0.85  |      | -0.14 | 0.88      |      | -2.75 | 0.04      | Down | -2.08 | 0.03  | Down | Leaf senescence related protein-like                         |
| Pc_TC081888 | 0.28  | 0.64  |      | -0.27 | 0.71      |      | -2.37 | 0.04      | Down | -2.14 | 0.01  | Down | Expressed protein                                            |
| Pc_TC081891 | 0.38  | 0.62  |      | 1.13  | 0.15      |      | -4.47 | 0         | Down | -2.61 | 0.01  | Down | Uncharacterized protein                                      |
| Pc_TC081897 | -2.73 | 0.02  | Down | -0.11 | 0.96      |      | -2.5  | 0.1       |      | -0.28 | 0.81  |      | RAS-related nuclear protein-1                                |
| Pc_TC081898 | 1.57  | 0.05  | Up   | 0     | 0         |      | 1.88  | 0.12      |      | 1     | 0.3   |      | Expressed protein                                            |
| Pc_TC081911 | 0.78  | 0.21  |      | 1.1   | 0.12      |      | -2.59 | 0.04      | Down | 0.11  | 0.91  |      | Expressed protein                                            |
| Pc_TC081913 | -1.52 | 0.04  | Down | -1.17 | 0.16      |      | 0.06  | 0.97      |      | -0.24 | 0.77  |      | Expressed protein                                            |
| Pc_TC081920 | -2.54 | 0     | Down | -0.43 | 0.53      |      | 0.49  | 0.63      |      | -0.16 | 0.83  |      | transcription factor jumonji (jmc) domain-containing protein |
| Pc_TC081922 | 0.66  | 0.23  |      | 0.13  | 0.85      |      | 0.36  | 0.73      |      | -1.65 | 0.03  | Down | Putative uncharacterized protein                             |
| Pc_TC081932 | -1.85 | 0.01  | Down | -3.99 | 8.18E-005 | Down | 0.96  | 0.36      |      | -0.07 | 0.93  |      | Expressed protein                                            |
| Pc_TC081933 | -2.13 | 0.02  | Down | -1.09 | 0.25      |      | 0.84  | 0.46      |      | -2.59 | 0.01  | Down | Expressed protein                                            |
| Pc_TC081934 | -0.45 | 0.47  |      | -1.64 | 0.04      | Down | 0.92  | 0.38      |      | 0.52  | 0.46  |      | Expressed protein                                            |
| Pc_TC081936 | 0.18  | 0.57  |      | -0.06 | 0.88      |      | -4.83 | 7.56E-007 | Down | -2.49 | ##### | Down | Expressed protein                                            |
| Pc_TC081938 | 2.28  | 0.01  | Up   | 0     | 0.07      |      | 0.43  | 0.83      |      | -3.7  | 0.08  |      | annexin 5                                                    |
| Pc_TC081939 | 0.89  | 0.19  |      | -4.59 | 0         | Down | 2.28  | 0.04      | Up   | 0.36  | 0.68  |      | Expressed protein                                            |
| Pc_TC081940 | 5.36  | ##### | Up   | 0     | 0.67      |      | 3.96  | 0.02      | Up   | -0.37 | 1     |      | annexin 5                                                    |
| Pc_TC081941 | 3.15  | ##### | Up   | 0     | 0         |      | 2.01  | 0.07      |      | 0.51  | 0.57  |      | Expressed protein                                            |
| Pc_TC081945 | 0.55  | 0.35  |      | 1.43  | 0.03      | Up   | -4.02 | 0         | Down | -1.41 | 0.07  |      | Expressed protein                                            |
| Pc_TC081948 | 0.51  | 0.22  |      | 0.91  | 0.07      |      | -2.29 | 0.02      | Down | -1.25 | 0.05  | Down | Expressed protein                                            |
| Pc_TC081968 | -2.29 | 0.04  | Down | 0.15  | 0.91      |      | -0.45 | 0.75      |      | -0.87 | 0.4   |      | Expressed protein                                            |
| Pc_TC081969 | -0.1  | 0.94  |      | -2.82 | 0.01      | Down | 0.5   | 0.68      |      | -0.34 | 0.72  |      | Expressed protein                                            |
| Pc_TC081982 | 0.33  | 0.58  |      | 0.68  | 0.32      |      | -3.42 | 0.01      | Down | -3.21 | 0     | Down | Expressed protein                                            |
| Pc_TC081996 | -0.66 | 0.5   |      | 1.92  | 0.02      | Up   | -1.6  | 0.26      |      | -1.7  | 0.12  |      | Expressed protein                                            |
| Pc_TC081999 | -0.43 | 0.5   |      | -0.55 | 0.46      |      | -2.37 | 0.04      | Down | -1.27 | 0.1   |      | Expressed protein                                            |
| Pc_TC082025 | 3.02  | 0.02  | Up   | 2.87  | 0.05      |      | 1.24  | 0.62      |      | 2.8   | 0.05  |      | Expressed protein                                            |
| Pc_TC082028 | 0.08  | 1     |      | -4.11 | 0.03      | Down | -1.08 | 0.49      |      | -1.09 | 0.39  |      | Expressed protein                                            |
| Pc_TC082029 | 0.37  | 0.72  |      | 0.6   | 0.57      |      | -3.96 | 0.03      | Down | -0.19 | 0.9   |      | Expressed protein                                            |
| Pc_TC082040 | -0.06 | 0.97  |      | 2.73  | 0         | Up   | -4.96 | 0         | Down | -1.19 | 0.21  |      | Transposase family tnp2, putative                            |
| Pc_TC082041 | 1.31  | 0.01  | Up   | 2.13  | 0         | Up   | -2.46 | 0.03      | Down | -2.74 | 0     | Down | putative CACTA, En/Spm sub-class                             |
| Pc_TC082042 | -0.13 | 0.91  |      | -0.4  | 0.7       |      | -3.38 | 0.03      | Down | -2.58 | 0.02  | Down | Expressed protein                                            |
| Pc_TC082046 | -0.17 | 0.7   |      | 1.08  | 0.03      | Up   | -0.73 | 0.44      |      | -0.59 | 0.32  |      | Uncharacterized protein                                      |
| Pc_TC082050 | 0.26  | 0.82  |      | 0.88  | 0.38      |      | 2.37  | 0.05      | Up   | 1.74  | 0.05  | Up   | Wall-associated kinase family protein                        |
| Pc_TC082060 | 0.29  | 0.58  |      | 0.91  | 0.13      |      | -2.19 | 0.04      | Down | -1.02 | 0.14  |      | Expressed protein                                            |
| Pc_TC082061 | -3.92 | 0     | Down | 0.45  | 0.64      |      | -2.17 | 0.13      |      | 0.67  | 0.46  |      | Expressed protein                                            |
| Pc_TC082065 | 0.57  | 0.26  |      | 0.99  | 0.09      |      | -7.35 | 1.29E-006 | Down | -4.23 | ##### | Down | Expressed protein                                            |
| Pc_TC082070 | 2.22  | 0     | Up   | 1.44  | 0.08      |      | 1.49  | 0.2       |      | 2.24  | 0     | Up   | Expressed protein                                            |
| Pc_TC082088 | -2.78 | 0.02  | Down | -2.21 | 0.08      |      | -2.55 | 0.09      |      | -3.65 | 0.01  | Down | Expressed protein                                            |
| Pc_TC082089 | -0.15 | 0.75  |      | -0.26 | 0.65      |      | -2.09 | 0.04      | Down | -1.44 | 0.02  | Down | Expressed protein                                            |
| Pc_TC082098 | 0.66  | 0.45  |      | -0.44 | 0.72      |      | 1.55  | 0.2       |      | 2.86  | 0     | Up   | Expressed protein                                            |
| Pc_TC082105 | 1.31  | 0.04  | Up   | 0.58  | 0.46      |      | 0.08  | 0.96      |      | 1.23  | 0.11  |      | Expressed protein                                            |

|             |       |       |      |  |       |           |      |  |       |           |      |       |       |      |                                                              |     |
|-------------|-------|-------|------|--|-------|-----------|------|--|-------|-----------|------|-------|-------|------|--------------------------------------------------------------|-----|
| Pc_TC082108 | 0.17  | 0.74  |      |  | -0.09 | 0.88      |      |  | -2.18 | 0.04      | Down | -1.28 | 0.06  |      | Uncharacterized protein                                      |     |
| Pc_TC082124 | 0.48  | 0.2   |      |  | 0.73  | 0.12      |      |  | -4    | 0         | Down | -1.7  | 0     | Down | Expressed protein                                            |     |
| Pc_TC082128 | 0.21  | 0.77  |      |  | 1.86  | 0.01      | Up   |  | -0.21 | 0.86      |      | -0.73 | 0.38  |      | Zinc-binding ribosomal protein family protein                |     |
| Pc_TC082147 | -1.19 | 0.24  |      |  | 1.98  | 0.02      | Up   |  | -3.35 | 0.04      | Down | -4.23 | 0     | Down | heat shock protein 70B                                       |     |
| Pc_TC082153 | 2.33  | 0.08  |      |  | 0.64  | 0.84      |      |  | 3.61  | 0.02      | Up   | 2.75  | 0.03  | Up   | Expressed protein                                            |     |
| Pc_TC082179 | -2.8  | 0.04  | Down |  | -2.4  | 0.09      |      |  | -2.15 | 0.17      |      | 0.52  | 0.62  |      | Uncharacterized protein                                      |     |
| Pc_TC082183 | 2.58  | 0.07  |      |  | 0.06  | 1         |      |  | 2.5   | 0.17      |      | 3.25  | 0.02  | Up   | Expressed protein                                            |     |
| Pc_TC082190 | -0.92 | 0.3   |      |  | -1.49 | 0.16      |      |  | -0.62 | 0.64      |      | -2.82 | 0.01  | Down | Uncharacterized protein                                      |     |
| Pc_TC082195 | -1.81 | 0.04  | Down |  | -0.12 | 0.91      |      |  | -1.03 | 0.41      |      | -0.55 | 0.54  |      | Expressed protein                                            |     |
| Pc_TC082198 | 0.72  | 0.08  |      |  | 1.03  | 0.04      | Up   |  | -1.44 | 0.14      |      | -0.04 | 0.95  |      | Expressed protein                                            |     |
| Pc_TC082220 | -1.09 | 0.11  |      |  | -1.79 | 0.03      | Down |  | 0.83  | 0.44      |      | 0.15  | 0.85  |      | Expressed protein                                            |     |
| Pc_TC082223 | 2.02  | 0.09  |      |  | 2.43  | 0.05      | Up   |  | 1.44  | 0.4       |      | 1.74  | 0.18  |      | Putative uncharacterized protein Sb04g007670                 |     |
| Pc_TC082233 | 0.51  | 0.4   |      |  | 0.71  | 0.31      |      |  | -3.15 | 0.01      | Down | -1.51 | 0.06  |      | Expressed protein                                            |     |
| Pc_TC082234 | -0.51 | 0.64  |      |  | -0.36 | 0.78      |      |  | -2.08 | 0.18      |      | -2.64 | 0.04  | Down | Expressed protein                                            |     |
| Pc_TC082253 | -0.08 | 0.92  |      |  | 0.33  | 0.67      |      |  | -2.35 | 0.05      |      | -2.29 | 0.01  | Down | Expressed protein                                            |     |
| Pc_TC082264 | -0.37 | 0.64  |      |  | -2.29 | 0.02      | Down |  | 0.8   | 0.48      |      | -0.14 | 0.89  |      | Expressed protein                                            |     |
| Pc_TC082267 | -0.05 | 0.9   |      |  | 0.16  | 0.71      |      |  | -1.43 | 0.11      |      | -1.19 | 0.03  | Down | Expressed protein                                            |     |
| Pc_TC082280 | 1.7   | 0.02  | Up   |  | 1.61  | 0.06      |      |  | -5.2  | 0.01      | Down | -2.49 | 0.04  | Down | Expressed protein                                            |     |
| Pc_TC082282 | -1.64 | 0.03  | Down |  | -0.55 | 0.51      |      |  | -0.59 | 0.61      |      | -1.19 | 0.15  |      | Expressed protein                                            |     |
| Pc_TC082285 | 1.83  | ##### | Up   |  | 0     | 6.76E-018 |      |  | 1.57  | 0.09      |      | 0.37  | 0.53  |      | kinesin 4                                                    |     |
| Pc_TC082291 | 2.54  | 0.05  | Up   |  | 1.64  | 0.33      |      |  | 3.53  | 0.02      | Up   | 2.63  | 0.05  | Up   | Expressed protein                                            |     |
| Pc_TC082312 | 3.02  | 0.02  | Up   |  | 3.38  | 0.01      | Up   |  | 2.83  | 0.11      |      | 4.17  | 0     | Up   | actin-related protein 5                                      |     |
| Pc_TC082313 | 1.59  | 0.05  | Up   |  | 1.19  | 0.22      |      |  | 2.89  | 0.01      | Up   | 1.5   | 0.1   |      | actin-related protein 5                                      |     |
| Pc_TC082332 | -2.21 | 0.02  | Down |  | -0.59 | 0.54      |      |  | 0.58  | 0.63      |      | -0.05 | 0.98  |      | Expressed protein                                            |     |
| Pc_TC082341 | 0.79  | 0.22  |      |  | 0.66  | 0.39      |      |  | -3.41 | 0.01      | Down | -1.07 | 0.21  |      | winged-helix DNA-binding transcription factor family protein | HSF |
| Pc_TC082350 | -0.35 | 0.58  |      |  | 0.15  | 0.84      |      |  | -1.74 | 0.12      |      | -1.71 | 0.03  | Down | Uncharacterized protein                                      |     |
| Pc_TC082358 | 0.36  | 0.49  |      |  | 1.01  | 0.09      |      |  | -2.96 | 0.01      | Down | -0.29 | 0.67  |      | Expressed protein                                            |     |
| Pc_TC082367 | -2.47 | 0     | Down |  | -0.98 | 0.24      |      |  | -4.16 | 0         | Down | -4.62 | ##### | Down | GTP binding Elongation factor Tu family protein              |     |
| Pc_TC082373 | 0.13  | 0.73  |      |  | 0.18  | 0.71      |      |  | -2.08 | 0.03      | Down | -1.62 | 0.01  | Down | Expressed protein                                            |     |
| Pc_TC082380 | 0.14  | 0.83  |      |  | -0.09 | 0.91      |      |  | -2.71 | 0.02      | Down | -2.08 | 0.01  | Down | Expressed protein                                            |     |
| Pc_TC082389 | 0.24  | 0.72  |      |  | 1.82  | 0.01      | Up   |  | -1.18 | 0.31      |      | -1.41 | 0.09  |      | Putative non-LTR retroelement reverse transcriptase          |     |
| Pc_TC082404 | 1.1   | 0.14  |      |  | 1.75  | 0.03      | Up   |  | -0.26 | 0.85      |      | 0.69  | 0.44  |      | Expressed protein                                            |     |
| Pc_TC082422 | 0.4   | 0.51  |      |  | 0.89  | 0.19      |      |  | -3.92 | 0         | Down | -1.21 | 0.12  |      | Expressed protein                                            |     |
| Pc_TC082432 | -1.46 | 0.01  | Down |  | -1.48 | 0.02      | Down |  | -5.98 | 5.53E-006 | Down | -2.42 | 0     | Down | Expressed protein                                            |     |
| Pc_TC082435 | 0.64  | 0.3   |      |  | 0.43  | 0.56      |      |  | -2.58 | 0.04      | Down | -2.16 | 0.01  | Down | Expressed protein                                            |     |
| Pc_TC082445 | -0.11 | 0.9   |      |  | -0.26 | 0.77      |      |  | -3.71 | 0.01      | Down | -4.4  | ##### | Down | Expressed protein                                            |     |
| Pc_TC082452 | -0.35 | 0.63  |      |  | -0.42 | 0.61      |      |  | -2.9  | 0.02      | Down | -2    | 0.02  | Down | Expressed protein                                            |     |
| Pc_TC082454 | -0.3  | 0.77  |      |  | 1.44  | 0.09      |      |  | 1.79  | 0.13      |      | 1.91  | 0.02  | Up   | Expressed protein                                            |     |
| Pc_TC082463 | -0.88 | 0.37  |      |  | -2.9  | 0.03      | Down |  | 1.13  | 0.35      |      | 0.26  | 0.81  |      | Uncharacterized protein                                      |     |
| Pc_TC082467 | 0.18  | 0.76  |      |  | 0.43  | 0.53      |      |  | -3.57 | 0         | Down | -2.36 | 0     | Down | Expressed protein                                            |     |
| Pc_TC082475 | 0.26  | 0.72  |      |  | 0.04  | 0.98      |      |  | -2.8  | 0.03      | Down | -1.58 | 0.07  |      | Expressed protein                                            |     |
| Pc_TC082479 | -1.4  | 0.01  | Down |  | -2.62 | 0         | Down |  | 0.99  | 0.3       |      | -0.53 | 0.42  |      | Expressed protein                                            |     |
| Pc_TC082494 | 1.48  | 0.02  | Up   |  | 1.17  | 0.13      |      |  | -2.41 | 0.07      |      | 0.78  | 0.34  |      | Transcription factor-like protein                            |     |
| Pc_TC082504 | -3.14 | 0.01  | Down |  | -4.75 | 0.01      | Down |  | -1.98 | 0.18      |      | -0.01 | 1     |      | Expressed protein                                            |     |
| Pc_TC082536 | -0.19 | 0.73  |      |  | 0.9   | 0.14      |      |  | -1.89 | 0.08      |      | -2.16 | 0     | Down | cysteine-rich RLK (RECEPTOR-like protein kinase) 8           |     |
| Pc_TC082538 | 1.17  | 0.15  |      |  | 0.66  | 0.52      |      |  | -0.27 | 0.87      |      | 2.2   | 0.01  | Up   | Expressed protein                                            |     |
| Pc_TC082541 | -0.33 | 0.6   |      |  | -0.3  | 0.68      |      |  | 2.16  | 0.03      | Up   | 1.28  | 0.06  |      | Expressed protein                                            |     |
| Pc_TC082542 | -1.6  | 0.02  | Down |  | -0.69 | 0.37      |      |  | 0.24  | 0.83      |      | 0.21  | 0.79  |      | Expressed protein                                            |     |
| Pc_TC082544 | 0.17  | 0.77  |      |  | -0.11 | 0.87      |      |  | -2.54 | 0.03      | Down | -1.97 | 0.01  | Down | Expressed protein                                            |     |
| Pc_TC082545 | 0     | 1     |      |  | 0.33  | 0.68      |      |  | -3.67 | 0.01      | Down | -0.82 | 0.33  |      | Expressed protein                                            |     |
| Pc_TC082550 | -0.92 | 0.6   |      |  | 0.98  | 0.45      |      |  | 2.88  | 0.03      | Up   | 2.98  | 0     | Up   | Predicted protein                                            |     |
| Pc_TC082552 | 0.68  | 0.15  |      |  | 1.45  | 0.01      | Up   |  | -2.71 | 0.01      | Down | -0.69 | 0.3   |      | Expressed protein                                            |     |
| Pc_TC082555 | -0.05 | 0.97  |      |  | 0.72  | 0.36      |      |  | -1.7  | 0.17      |      | -2.03 | 0.03  | Down | Expressed protein                                            |     |
| Pc_TC082570 | 0.21  | 0.77  |      |  | 1.38  | 0.05      | Up   |  | -1.54 | 0.2       |      | -1.41 | 0.1   |      | Expressed protein                                            |     |
| Pc_TC082577 | -0.61 | 0.45  |      |  | -1.06 | 0.26      |      |  | -0.89 | 0.47      |      | -3.02 | 0     | Down | Expressed protein                                            |     |
| Pc_TC082589 | -1.98 | 0.01  | Down |  | -1.94 | 0.02      | Down |  | 0.79  | 0.46      |      | -0.11 | 0.89  |      | Expressed protein                                            |     |
| Pc_TC082593 | 0.19  | 0.82  |      |  | 0.27  | 0.77      |      |  | -3.17 | 0.02      | Down | -1.24 | 0.18  |      | Uncharacterized protein                                      |     |
| Pc_TC082597 | 0     | 0     |      |  | 0     | 0         |      |  | 0     | 0         |      | -5.37 | 0     | Down | Ferritin/ribonucleotide reductase-like family protein        |     |
| Pc_TC082626 | 0.19  | 0.82  |      |  | 0.47  | 0.58      |      |  | 0     | 0         |      | -4.08 | 0     | Down | Expressed protein                                            |     |
| Pc_TC082627 | 0.21  | 0.72  |      |  | 0.97  | 0.13      |      |  | -2.54 | 0.03      | Down | -1.38 | 0.06  |      | Expressed protein                                            |     |
| Pc_TC082641 | 1.45  | 0     | Up   |  | 0.3   | 0.65      |      |  | 0.27  | 0.8       |      | 1.18  | 0.07  |      | Expressed protein                                            |     |
| Pc_TC082657 | 0.61  | 0.45  |      |  | 1.82  | 0.02      | Up   |  | -3    | 0.05      | Down | -3.14 | 0.01  | Down | Expressed protein                                            |     |

|             |       |      |      |       |           |      |  |       |           |      |       |       |      |                                                                          |         |
|-------------|-------|------|------|-------|-----------|------|--|-------|-----------|------|-------|-------|------|--------------------------------------------------------------------------|---------|
| Pc_TC082666 | -1.61 | 0.03 | Down | -0.26 | 0.75      |      |  | -2.48 | 0.04      | Down | -2.82 | 0     | Down | Expressed protein                                                        |         |
| Pc_TC082683 | 0.44  | 0.51 |      | 0.26  | 0.75      |      |  | -3.71 | 0.01      | Down | -2.34 | 0.01  | Down | Expressed protein                                                        |         |
| Pc_TC082684 | 0.59  | 0.06 |      | 0.6   | 0.14      |      |  | -2.29 | 0.01      | Down | -0.69 | 0.18  |      | Expressed protein                                                        |         |
| Pc_TC082720 | 0.2   | 0.62 |      | 0.31  | 0.55      |      |  | -3.44 | 0         | Down | -1.77 | 0     | Down | Expressed protein                                                        |         |
| Pc_TC082722 | 0.36  | 0.47 |      | 0.42  | 0.48      |      |  | -3.04 | 0.01      | Down | -1.21 | 0.08  |      | Expressed protein                                                        |         |
| Pc_TC082737 | -3.01 | 0.01 | Down | -5.03 | 0         | Down |  | 0.12  | 0.95      |      | -4.46 | 0     | Down | Expressed protein                                                        |         |
| Pc_TC082748 | 3.43  | 0    | Up   | 0     | 0.27      |      |  | 2.23  | 0.17      |      | -1.11 | 0.68  |      | Heat shock protein 70 (Hsp 70) family protein                            |         |
| Pc_TC082752 | 0.28  | 0.61 |      | 0.68  | 0.29      |      |  | -2.26 | 0.04      | Down | -0.61 | 0.39  |      | Expressed protein                                                        |         |
| Pc_TC082754 | -0.86 | 0.22 |      | -0.78 | 0.33      |      |  | 2.41  | 0.02      | Up   | 1.53  | 0.03  | Up   | Expressed protein                                                        |         |
| Pc_TC082758 | 0.33  | 0.62 |      | 0.57  | 0.44      |      |  | 0     | 2.69E-005 |      | -5.68 | ##### | Down | Expressed protein                                                        |         |
| Pc_TC082759 | 0.14  | 0.82 |      | 0.65  | 0.32      |      |  | -3.21 | 0.01      | Down | -1.54 | 0.04  | Down | Expressed protein                                                        |         |
| Pc_TC082763 | 1.79  | 0.04 | Up   | 1.24  | 0.24      |      |  | 1.94  | 0.13      |      | -0.28 | 0.87  |      | unknown protein                                                          |         |
| Pc_TC082764 | 1.56  | 0.05 |      | 1.64  | 0.08      |      |  | 1.11  | 0.39      |      | 2.12  | 0.02  | Up   | unknown protein                                                          |         |
| Pc_TC082765 | -0.27 | 0.7  |      | -2.08 | 0.02      | Down |  | 0.41  | 0.71      |      | 0.85  | 0.24  |      | unknown protein                                                          |         |
| Pc_TC082771 | -2.4  | 0    | Down | -4.42 | 4.88E-005 | Down |  | 0.21  | 0.86      |      | -1.18 | 0.15  |      | cysteine-rich RLK (RECEPTOR-like protein kinase) 8                       |         |
| Pc_TC082777 | -1.33 | 0.02 | Down | -2.17 | 0         | Down |  | 1.22  | 0.21      |      | -0.87 | 0.2   |      | Expressed protein                                                        |         |
| Pc_TC082780 | 0.31  | 0.62 |      | 2.04  | 0         | Up   |  | -4.76 | 0         | Down | -1.83 | 0.03  | Down | Expressed protein                                                        |         |
| Pc_TC082782 | 1.68  | 0    | Up   | -6.81 | 1.40E-007 | Down |  | 1.71  | 0.09      |      | 0.03  | 0.98  |      | S18 ribosomal protein                                                    |         |
| Pc_TC082785 | -0.15 | 0.84 |      | 0.91  | 0.21      |      |  | -1.44 | 0.22      |      | -2.54 | 0.01  | Down | Uncharacterized protein                                                  |         |
| Pc_TC082794 | 0.69  | 0.11 |      | 0.42  | 0.44      |      |  | 1.89  | 0.04      | Up   | 0.3   | 0.62  |      | Expressed protein                                                        |         |
| Pc_TC082806 | 1.4   | 0.01 | Up   | 0.8   | 0.22      |      |  | -2.78 | 0.02      | Down | -1.71 | 0.03  | Down | Os05g0374000 protein                                                     |         |
| Pc_TC082808 | -1.86 | 0    | Down | -3.01 | 2.17E-005 | Down |  | 1.92  | 0.04      | Up   | 0.23  | 0.71  |      | Expressed protein                                                        |         |
| Pc_TC082809 | 2.15  | 0    | Up   | 0     | 3.04E-005 |      |  | 1.9   | 0.08      |      | 1.15  | 0.14  |      | CYTOCHROME C-1                                                           |         |
| Pc_TC082811 | -0.41 | 0.51 |      | 0.3   | 0.67      |      |  | -2.25 | 0.05      |      | -2.21 | 0.01  | Down | Expressed protein                                                        |         |
| Pc_TC082815 | -0.76 | 0.19 |      | 0     | 1.11E-010 |      |  | -0.79 | 0.45      |      | -2.55 | 0     | Down | Uncharacterized protein                                                  |         |
| Pc_TC082834 | -2.19 | 0.05 | Down | -2.48 | 0.05      |      |  | 0.84  | 0.5       |      | -0.37 | 0.73  |      | Expressed protein                                                        |         |
| Pc_TC082843 | 0.92  | 0.16 |      | 1.03  | 0.17      |      |  | -2.73 | 0.04      | Down | 0.03  | 0.99  |      | cysteine-rich RLK (RECEPTOR-like protein kinase) 5                       |         |
| Pc_TC082844 | 0.44  | 0.53 |      | 0.88  | 0.25      |      |  | 1.2   | 0.27      |      | 1.66  | 0.02  | Up   | S-locus lectin protein kinase family protein                             |         |
| Pc_TC082863 | 0.34  | 0.41 |      | 0.73  | 0.15      |      |  | -2.85 | 0.01      | Down | -1.67 | 0.01  | Down | Expressed protein                                                        |         |
| Pc_TC082865 | -1.05 | 0.05 | Down | -3.74 | 9.62E-007 | Down |  | 0.23  | 0.82      |      | 0.59  | 0.34  |      | cysteine-rich RLK (RECEPTOR-like protein kinase) 8                       |         |
| Pc_TC082872 | -1.13 | 0.26 |      | -2.53 | 0.05      | Down |  | -0.65 | 0.64      |      | -1.7  | 0.12  |      | Expressed protein                                                        |         |
| Pc_TC082876 | -2.88 | 0    | Down | -4.31 | 0         | Down |  | -6.45 | 0         | Down | -3.74 | 0     | Down | Expressed protein                                                        |         |
| Pc_TC082897 | 3.17  | 0.04 | Up   | 0     | 0.67      |      |  | 1.67  | 0.53      |      | 2.33  | 0.22  |      | Expressed protein                                                        |         |
| Pc_TC082903 | 0.3   | 0.59 |      | 0.79  | 0.21      |      |  | -7.96 | 1.86E-006 | Down | -2.75 | 0     | Down | Expressed protein                                                        |         |
| Pc_TC082911 | -2.17 | 0.03 | Down | -1.87 | 0.09      |      |  | 1.55  | 0.18      |      | -0.87 | 0.37  |      | Expressed protein                                                        |         |
| Pc_TC082951 | -2.36 | 0.02 | Down | -1.73 | 0.11      |      |  | 0.21  | 0.88      |      | -0.76 | 0.43  |      | Expressed protein                                                        |         |
| Pc_TC082972 | 0.85  | 0.01 |      | 1.15  | 0.01      | Up   |  | -3.49 | 0         | Down | -0.88 | 0.11  |      | Caleosin-related family protein                                          |         |
| Pc_TC082984 | -0.64 | 0.52 |      | 0.34  | 0.75      |      |  | -1.98 | 0.18      |      | -3.6  | 0.01  | Down | Expressed protein                                                        |         |
| Pc_TC083000 | 1.55  | 0.15 |      | 2.1   | 0.06      |      |  | 2.22  | 0.11      |      | 2.21  | 0.04  | Up   | Expressed protein                                                        |         |
| Pc_TC083002 | -1.08 | 0.11 |      | -1.66 | 0.04      | Down |  | 0.84  | 0.43      |      | -0.01 | 1     |      | Expressed protein                                                        |         |
| Pc_TC083029 | -1.06 | 0.35 |      | -2.08 | 0.13      |      |  | 2.93  | 0.01      | Up   | 0.63  | 0.54  |      | Expressed protein                                                        |         |
| Pc_TC083034 | 0.4   | 0.44 |      | 0.69  | 0.26      |      |  | -2.06 | 0.06      |      | -1.91 | 0.01  | Down | Expressed protein                                                        |         |
| Pc_TC083037 | 0.43  | 0.78 |      | 1.41  | 0.22      |      |  | 3.34  | 0.01      | Up   | 2.49  | 0.01  | Up   | BED zinc finger ;hAT family dimerisation domain                          |         |
| Pc_TC083038 | 1.32  | 0.05 | Up   | -0.25 | 0.8       |      |  | 1.86  | 0.09      |      | 0.58  | 0.49  |      | BED zinc finger ;hAT family dimerisation domain                          |         |
| Pc_TC083039 | -1.46 | 0.03 | Down | -0.66 | 0.37      |      |  | 0.55  | 0.6       |      | 0.39  | 0.59  |      | BED zinc finger ;hAT family dimerisation domain                          |         |
| Pc_TC083040 | -2.11 | 0.01 | Down | -2.13 | 0.03      | Down |  | -0.64 | 0.59      |      | 0.23  | 0.79  |      | BED zinc finger ;hAT family dimerisation domain                          |         |
| Pc_TC083041 | 0.6   | 0.21 |      | 0.82  | 0.16      |      |  | -6.62 | 2.16E-006 | Down | -3.01 | ##### | Down | C2 calcium/lipid-binding and GRAM domain containing protein              |         |
| Pc_TC083055 | -1.58 | 0.02 | Down | -0.68 | 0.36      |      |  | 0.51  | 0.63      |      | -0.14 | 0.86  |      | AP2/B3-like transcriptional factor family protein                        | ABI3VP1 |
| Pc_TC083063 | -1.99 | 0.01 | Down | -1.76 | 0.04      | Down |  | 3.68  | 0         | Up   | 2.18  | 0     | Up   | P-loop containing nucleoside triphosphate hydrolases superfamily protein |         |
| Pc_TC083064 | -0.89 | 0.08 |      | -1.56 | 0.01      | Down |  | 3.11  | 0         | Up   | 2.06  | 0     | Up   | desulfo-glucosinolate sulfotransferase 18                                |         |
| Pc_TC083069 | -0.65 | 0.28 |      | -2.86 | 0         | Down |  | 0.14  | 0.9       |      | -0.41 | 0.57  |      | Expressed protein                                                        |         |
| Pc_TC083070 | 1.3   | 0.1  |      | 2     | 0.02      | Up   |  | 2.09  | 0.08      |      | 1.89  | 0.03  | Up   | Expressed protein                                                        |         |
| Pc_TC083094 | -0.5  | 0.24 |      | -1.7  | 0         | Down |  | 1.53  | 0.09      |      | 0.44  | 0.44  |      | Expressed protein                                                        |         |
| Pc_TC083098 | 0.39  | 0.38 |      | -0.11 | 0.85      |      |  | -3    | 0.01      | Down | -0.77 | 0.22  |      | Os05g0524100 protein (Fragment)                                          |         |
| Pc_TC083099 | 0.82  | 0.21 |      | 1.38  | 0.06      |      |  | -4.15 | 0         | Down | -2.1  | 0.02  | Down | Expressed protein                                                        |         |
| Pc_TC083119 | 0.18  | 0.72 |      | 0.36  | 0.55      |      |  | -2.08 | 0.05      |      | -1.64 | 0.02  | Down | Expressed protein                                                        |         |
| Pc_TC083120 | -3.73 | 0.05 | Down | -1.75 | 0.28      |      |  | 0.28  | 0.89      |      | -1.37 | 0.34  |      | Expressed protein                                                        |         |
| Pc_TC083122 | -1.73 | 0.11 |      | 0.61  | 0.53      |      |  | -1.98 | 0.18      |      | -2.37 | 0.05  | Down | RAS-related nuclear protein-1                                            |         |
| Pc_TC083126 | -1.18 | 0.04 | Down | -1.05 | 0.12      |      |  | 1.28  | 0.19      |      | -0.39 | 0.57  |      | OSJNBa0033H08.10 protein                                                 |         |
| Pc_TC083129 | 0.48  | 0.36 |      | 0.55  | 0.38      |      |  | -3.06 | 0.01      | Down | -0.74 | 0.29  |      | Expressed protein                                                        |         |
| Pc_TC083134 | 1.82  | 0.01 | Up   | 1.93  | 0.02      | Up   |  | -0.32 | 0.83      |      | 1.58  | 0.06  |      | Expressed protein                                                        |         |
| Pc_TC083142 | 1.08  | 0.57 |      | 0.06  | 1         |      |  | 2.55  | 0.12      |      | 3.12  | 0.01  | Up   | Expressed protein                                                        |         |

|             |       |       |      |       |           |      |       |           |      |       |       |      |                                                                  |
|-------------|-------|-------|------|-------|-----------|------|-------|-----------|------|-------|-------|------|------------------------------------------------------------------|
| Pc_TC083146 | -0.23 | 0.68  |      | 0.22  | 0.74      |      | -1.46 | 0.17      |      | -1.8  | 0.01  | Down | Expressed protein                                                |
| Pc_TC083158 | 1.32  | ##### | Up   | 0.85  | 0.03      |      | -0.15 | 0.86      |      | 1.14  | 0.02  | Up   | Expressed protein                                                |
| Pc_TC083168 | 0.11  | 0.8   |      | -0.27 | 0.62      |      | -2.67 | 0.01      | Down | -2.04 | 0     | Down | Putative retroelement                                            |
| Pc_TC083172 | -0.97 | 0.06  |      | -0.14 | 0.82      |      | -2.18 | 0.04      | Down | -2.7  | 0     | Down | Expressed protein                                                |
| Pc_TC083174 | -0.24 | 0.84  |      | 1.22  | 0.18      |      | -3.56 | 0.04      | Down | -1.32 | 0.25  |      | Expressed protein                                                |
| Pc_TC083175 | -2.73 | 0.02  | Down | -1.29 | 0.27      |      | -0.5  | 0.73      |      | -0.6  | 0.58  |      | Expressed protein                                                |
| Pc_TC083187 | -0.09 | 0.93  |      | -2.02 | 0.04      | Down | 0.26  | 0.83      |      | -0.37 | 0.67  |      | Expressed protein                                                |
| Pc_TC083188 | 0.66  | 0.97  |      | 3.52  | 0.03      | Up   | 3.71  | 0.04      | Up   | 4.02  | 0     | Up   | Expressed protein                                                |
| Pc_TC083190 | -0.13 | 0.89  |      | -0.12 | 0.91      |      | -1.92 | 0.14      |      | -2.05 | 0.04  | Down | Expressed protein                                                |
| Pc_TC083209 | 0.49  | 0.25  |      | 0.94  | 0.07      |      | -3.15 | 0         | Down | -2.26 | 0     | Down | Expressed protein                                                |
| Pc_TC083224 | -0.26 | 0.67  |      | -0.2  | 0.78      |      | -4.38 | 0         | Down | -3.04 | 0     | Down | Expressed protein                                                |
| Pc_TC083238 | 0.46  | 0.21  |      | 0.51  | 0.27      |      | -1.86 | 0.05      | Down | -0.56 | 0.31  |      | Expressed protein                                                |
| Pc_TC083246 | 0     | 1     |      | 0.64  | 0.57      |      | -4.67 | 0.03      | Down | -3.54 | 0.03  | Down | Expressed protein                                                |
| Pc_TC083247 | -0.06 | 0.92  |      | 1.16  | 0.05      | Up   | -3.42 | 0         | Down | -0.71 | 0.29  |      | Expressed protein                                                |
| Pc_TC083248 | -1.19 | 0.11  |      | 0.02  | 1         |      | -2.68 | 0.03      | Down | -2.12 | 0.02  | Down | Expressed protein                                                |
| Pc_TC083259 | -0.46 | 0.57  |      | -2.94 | 0.01      | Down | -3.76 | 0.01      | Down | -1.26 | 0.18  |      | Expressed protein                                                |
| Pc_TC083260 | 1.45  | 0.08  |      | 1.81  | 0.05      | Up   | 1.9   | 0.13      |      | 1.63  | 0.08  |      | Expressed protein                                                |
| Pc_TC083265 | 0.31  | 0.59  |      | 0.11  | 0.89      |      | -2.89 | 0.01      | Down | -1.22 | 0.1   |      | Expressed protein                                                |
| Pc_TC083282 | 3.25  | 0.14  |      | 3.96  | 0.05      | Up   | 2.83  | 0.32      |      | 3.87  | 0.04  | Up   | Expressed protein                                                |
| Pc_TC083298 | 0.27  | 0.67  |      | 0.94  | 0.17      |      | -2.7  | 0.03      | Down | -1.24 | 0.11  |      | Expressed protein                                                |
| Pc_TC083327 | -4.24 | 0.01  | Down | -0.36 | 0.8       |      | -1.82 | 0.25      |      | -1.7  | 0.18  |      | Putative uncharacterized protein                                 |
| Pc_TC083331 | 0.57  | 0.15  |      | 0.77  | 0.12      |      | -5.38 | 3.61E-006 | Down | -3.26 | ##### | Down | Expressed protein                                                |
| Pc_TC083342 | 0.95  | 0.38  |      | 0.38  | 0.82      |      | 2.96  | 0.02      | Up   | 1.71  | 0.1   |      | Expressed protein                                                |
| Pc_TC083344 | -2.42 | 0.01  | Down | -1.37 | 0.13      |      | 0.9   | 0.42      |      | -0.31 | 0.72  |      | putative recombination initiation defect 1                       |
| Pc_TC083367 | 0.31  | 0.61  |      | 1.16  | 0.08      |      | -3.67 | 0         | Down | -1.52 | 0.05  |      | Expressed protein                                                |
| Pc_TC083370 | 1.29  | 0.07  |      | 2     | 0.01      | Up   | -0.83 | 0.53      |      | 0.44  | 0.63  |      | ORF16-lacZ fusion protein                                        |
| Pc_TC083371 | -0.72 | 0.32  |      | -1.36 | 0.12      |      | -1.92 | 0.12      |      | -1.85 | 0.04  | Down | Expressed protein                                                |
| Pc_TC083394 | 0.79  | 0.12  |      | 0.89  | 0.14      |      | -2.57 | 0.02      | Down | -1.15 | 0.1   |      | Expressed protein                                                |
| Pc_TC083401 | 0.67  | 0.05  |      | 0.77  | 0.08      |      | -4.36 | 1.96E-005 | Down | -1.38 | 0.01  | Down | Expressed protein                                                |
| Pc_TC083409 | 0.87  | 0.09  |      | 0.49  | 0.45      |      | -0.71 | 0.5       |      | 1.47  | 0.02  | Up   | Expressed protein                                                |
| Pc_TC083415 | 0.27  | 0.55  |      | 1.15  | 0.03      | Up   | 0     | 3.05E-009 |      | -5.01 | ##### | Down | EST D48432(S14625) corresponds to a region of the predicted gene |
| Pc_TC083439 | 1.89  | 0     | Up   | -5.43 | 0         | Down | 1.32  | 0.25      |      | -0.37 | 0.69  |      | Expressed protein                                                |
| Pc_TC083445 | 0     | ##### |      | 0     | 1.16E-005 |      | -5.35 | 0         | Down | 0     | ##### |      | Expressed protein                                                |
| Pc_TC083453 | 0.5   | 0.52  |      | 2.07  | 0.01      | Up   | 0.19  | 0.9       |      | 0.16  | 0.88  |      | Expressed protein                                                |
| Pc_TC083455 | -1.2  | 0.05  | Down | -1.38 | 0.05      |      | -0.16 | 0.88      |      | -1    | 0.16  |      | Expressed protein                                                |
| Pc_TC083464 | 0.87  | 0.2   |      | 1.02  | 0.19      |      | -3.11 | 0.02      | Down | -0.25 | 0.78  |      | Expressed protein                                                |
| Pc_TC083474 | -0.3  | 0.5   |      | -1.14 | 0.05      | Down | 1.84  | 0.04      | Up   | 1.08  | 0.06  |      | Serine protease 33                                               |
| Pc_TC083481 | -2.96 | 0     | Down | -4.68 | 1.02E-005 | Down | 1.16  | 0.27      |      | 0.05  | 0.95  |      | Expressed protein                                                |
| Pc_TC083483 | -1.69 | 0.03  | Down | 0.1   | 0.92      |      | -2.26 | 0.07      |      | -3    | 0     | Down | Expressed protein                                                |
| Pc_TC083484 | 2.06  | 0     | Up   | 1.72  | 0.03      | Up   | -0.83 | 0.52      |      | -0.14 | 0.91  |      | Os10g0154200 protein (Fragment)                                  |
| Pc_TC083485 | -0.2  | 0.68  |      | 1.39  | 0.01      | Up   | -4.49 | 0         | Down | -3    | ##### | Down | Expressed protein                                                |
| Pc_TC083486 | -0.58 | 0.35  |      | -3.3  | 0         | Down | 1.79  | 0.08      |      | 0.68  | 0.32  |      | Uncharacterized protein                                          |
| Pc_TC083488 | 0.23  | 0.7   |      | 0.98  | 0.14      |      | -3.07 | 0.01      | Down | -1.51 | 0.05  |      | Expressed protein                                                |
| Pc_TC083501 | 0.33  | 0.43  |      | 0.45  | 0.38      |      | -2.27 | 0.02      | Down | -2.08 | 0     | Down | Putative uncharacterized protein                                 |
| Pc_TC083502 | -0.6  | 0.53  |      | -1.13 | 0.3       |      | -3.5  | 0.03      | Down | -1.67 | 0.12  |      | Expressed protein                                                |
| Pc_TC083503 | 0.38  | 0.53  |      | 1.39  | 0.04      | Up   | -0.79 | 0.48      |      | -0.77 | 0.31  |      | Leucine-rich repeat transmembrane protein kinase                 |
| Pc_TC083507 | 0.38  | 0.57  |      | 1.09  | 0.13      |      | -4.12 | 0         | Down | -2.34 | 0.01  | Down | Expressed protein                                                |
| Pc_TC083510 | -0.14 | 0.8   |      | 0.25  | 0.69      |      | -2.79 | 0.01      | Down | -2.61 | 0     | Down | Expressed protein                                                |
| Pc_TC083529 | 0.72  | 0.1   |      | 1.02  | 0.06      |      | -3.63 | 0         | Down | -0.68 | 0.29  |      | Expressed protein                                                |
| Pc_TC083532 | -2.7  | 0.01  | Down | -1.94 | 0.06      |      | 1.87  | 0.09      |      | 0.11  | 0.92  |      | Expressed protein                                                |
| Pc_TC083544 | 0.49  | 0.37  |      | 0.87  | 0.18      |      | -2.55 | 0.03      | Down | -0.89 | 0.22  |      | Expressed protein                                                |
| Pc_TC083549 | -1.18 | 0.02  | Down | -0.56 | 0.35      |      | 0.79  | 0.4       |      | 0.21  | 0.73  |      | Protein of unknown function (DUF3414)                            |
| Pc_TC083551 | 0.2   | 0.77  |      | 1.49  | 0.03      | Up   | -5.07 | 0         | Down | -3.49 | 0     | Down | Expressed protein                                                |
| Pc_TC083582 | 3.25  | 0.01  | Up   | 3.23  | 0.02      | Up   | 3.24  | 0.05      |      | 1.5   | 0.44  |      | Expressed protein                                                |
| Pc_TC083595 | -4.57 | 0     | Down | -2.26 | 0.09      |      | -1.23 | 0.39      |      | -2.43 | 0.05  |      | putative unclassified expressed                                  |
| Pc_TC083601 | 0.78  | 0.13  |      | 0.46  | 0.47      |      | -2.62 | 0.02      | Down | 0.4   | 0.55  |      | Expressed protein                                                |
| Pc_TC083614 | 1.94  | 0     | Up   | 0     | 2.48E-008 |      | 1.96  | 0.06      |      | 0.08  | 0.93  |      | Leucine-rich repeat transmembrane protein kinase family protein  |
| Pc_TC083616 | -0.67 | 0.43  |      | -0.48 | 0.63      |      | -1.8  | 0.18      |      | -2.6  | 0.02  | Down | Expressed protein                                                |
| Pc_TC083627 | 0     | 0     |      | -1.88 | 0.15      |      | -4.02 | 0.03      | Down | -2.58 | 0.05  | Down | Ribosomal L22e protein family                                    |
| Pc_TC083635 | 0.58  | 0.29  |      | 1.29  | 0.04      | Up   | -2.88 | 0.01      | Down | -1.71 | 0.03  | Down | Expressed protein                                                |
| Pc_TC083658 | -1.98 | 0.03  | Down | -4    | 0         | Down | -2.14 | 0.1       |      | -2.02 | 0.04  | Down | light harvesting complex photosystem II                          |
| Pc_TC083674 | 0.42  | 0.15  |      | -0.04 | 0.91      |      | -1.79 | 0.03      | Down | -1.26 | 0.01  | Down | Expressed protein                                                |

|             |       |       |      |       |           |      |       |           |      |       |       |      |                                                                     |     |
|-------------|-------|-------|------|-------|-----------|------|-------|-----------|------|-------|-------|------|---------------------------------------------------------------------|-----|
| Pc_TC083678 | 0.77  | 0.27  |      | 0.62  | 0.45      |      | -3.88 | 0.01      | Down | -2.75 | 0.01  | Down | Expressed protein                                                   |     |
| Pc_TC083698 | 2.89  | 0.08  |      | 3.64  | 0.02      | Up   | 1.83  | 0.47      |      | 1.95  | 0.36  |      | manganese superoxide dismutase 1                                    |     |
| Pc_TC083708 | 0.54  | 0.31  |      | 0.72  | 0.25      |      | -1.68 | 0.12      |      | -1.76 | 0.02  | Down | Expressed protein                                                   |     |
| Pc_TC083715 | -1.83 | 0.01  | Down | -1.63 | 0.05      |      | 0.77  | 0.48      |      | 0     | 1     |      | putative glycine decarboxylase subunit [Triticum aestivum]          |     |
| Pc_TC083726 | -1.86 | 0     | Down | 1.61  | 0.01      | Up   | -0.48 | 0.64      |      | -0.82 | 0.24  |      | Structural maintenance of chromosomes (SMC) family protein          |     |
| Pc_TC083740 | 3.62  | ##### | Up   | 0     | 0.2       |      | 2.09  | 0.18      |      | 0.85  | 0.61  |      | 20S proteasome beta subunit C2                                      |     |
| Pc_TC083765 | 0.17  | 0.83  |      | 0.34  | 0.68      |      | -2.7  | 0.04      | Down | -2.47 | 0.01  | Down | Expressed protein                                                   |     |
| Pc_TC083769 | 0.99  | 0.09  |      | -1.06 | 0.18      |      | 0.9   | 0.39      |      | -2.11 | 0.01  | Down | Expressed protein                                                   |     |
| Pc_TC083771 | 0.03  | 0.97  |      | -0.2  | 0.77      |      | -2.01 | 0.07      |      | -2.09 | 0.01  | Down | Expressed protein                                                   |     |
| Pc_TC083789 | -1.61 | 0.13  |      | -3.8  | 0.01      | Down | -0.77 | 0.58      |      | -0.59 | 0.58  |      | Expressed protein                                                   |     |
| Pc_TC083799 | 0.73  | 0.02  |      | 0.61  | 0.12      |      | -2.85 | 0         | Down | 0.31  | 0.52  |      | Expressed protein                                                   |     |
| Pc_TC083804 | 0.19  | 0.7   |      | 0.67  | 0.24      |      | -1.23 | 0.23      |      | -1.38 | 0.04  | Down | Expressed protein                                                   |     |
| Pc_TC083814 | -2.24 | 0.01  | Down | -1.11 | 0.21      |      | 0.76  | 0.5       |      | 0.11  | 0.91  |      | Expressed protein                                                   |     |
| Pc_TC083815 | -1.34 | 0.32  |      | -3.94 | 0.05      | Down | 1.26  | 0.35      |      | -0.47 | 0.74  |      | Expressed protein                                                   |     |
| Pc_TC083821 | -0.05 | 0.92  |      | -0.04 | 0.94      |      | -1.19 | 0.24      |      | -1.32 | 0.05  | Down | Expressed protein                                                   |     |
| Pc_TC083840 | 1.94  | 0.02  | Up   | 0     | 0.02      |      | 1.48  | 0.27      |      | -0.72 | 0.61  |      | Expressed protein                                                   |     |
| Pc_TC083850 | -0.54 | 0.53  |      | 1.2   | 0.14      |      | -4.82 | 0         | Down | -2.53 | 0.02  | Down | Expressed protein                                                   |     |
| Pc_TC083851 | 1.4   | 0.12  |      | 3.98  | 8.57E-007 | Up   | -4.5  | 0.04      | Down | 0.08  | 1     |      | Expressed protein                                                   |     |
| Pc_TC083852 | 1.33  | 0.03  | Up   | 2.46  | 0         | Up   | -5.2  | 0         | Down | -1.34 | 0.11  |      | Expressed protein                                                   |     |
| Pc_TC083854 | -0.51 | 1     |      | 3.17  | 0.02      | Up   | -0.5  | 0.99      |      | -0.37 | 1     |      | Uncharacterized protein                                             |     |
| Pc_TC083857 | 0.3   | 0.55  |      | 1.12  | 0.05      | Up   | -2.37 | 0.03      | Down | -2.73 | 0     | Down | Expressed protein                                                   |     |
| Pc_TC083871 | 0.15  | 0.8   |      | 0.3   | 0.67      |      | -2.27 | 0.05      | Down | -1.08 | 0.15  |      | Expressed protein                                                   |     |
| Pc_TC083894 | 0.79  | 0.18  |      | 0.94  | 0.17      |      | -2.14 | 0.07      |      | -2.22 | 0.01  | Down | Expressed protein                                                   |     |
| Pc_TC083903 | 0.4   | 0.4   |      | 1.16  | 0.04      | Up   | -4.8  | 8.30E-005 | Down | -3.39 | ##### | Down | Expressed protein                                                   |     |
| Pc_TC083926 | 0.83  | 0.13  |      | -1.15 | 0.12      |      | -0.08 | 0.94      |      | 1.69  | 0.01  | Up   | Expressed protein                                                   |     |
| Pc_TC083946 | 0.53  | 0.44  |      | 1.09  | 0.14      |      | 0     | 7.84E-005 |      | -2.26 | 0.02  | Down | Expressed protein                                                   |     |
| Pc_TC083947 | 1.37  | 0.02  | Up   | 0     | 3.61E-007 |      | 1.65  | 0.12      |      | 0.59  | 0.43  |      | GATA type zinc finger transcription factor family protein           | LIM |
| Pc_TC083964 | 0.91  | 0.09  |      | 1.33  | 0.03      | Up   | -0.42 | 0.69      |      | 0.83  | 0.22  |      | Expressed protein                                                   |     |
| Pc_TC083967 | 0.4   | 0.71  |      | 1.69  | 0.07      |      | -0.06 | 1         |      | 2     | 0.02  | Up   | Uncharacterized protein                                             |     |
| Pc_TC083972 | 0.61  | 0.21  |      | 1.27  | 0.03      | Up   | -2.67 | 0.02      | Down | -1.76 | 0.01  | Down | Expressed protein                                                   |     |
| Pc_TC083983 | -0.7  | 0.38  |      | -2.35 | 0.02      | Down | -1.52 | 0.23      |      | 0.36  | 0.67  |      | Expressed protein                                                   |     |
| Pc_TC083985 | -0.65 | 0.47  |      | 0.2   | 0.85      |      | 1.27  | 0.27      |      | -2.3  | 0.03  | Down | Expressed protein                                                   |     |
| Pc_TC083988 | 0.08  | 1     |      | 2.76  | 0.01      | Up   | -0.17 | 0.99      |      | -0.37 | 0.89  |      | Expressed protein                                                   |     |
| Pc_TC083998 | 0.49  | 0.76  |      | 2.93  | 0         | Up   | -1.34 | 0.52      |      | -0.74 | 0.69  |      | Expressed protein                                                   |     |
| Pc_TC084001 | -2.26 | 0     | Down | -0.91 | 0.25      |      | -1.5  | 0.19      |      | -1.75 | 0.03  | Down | Expressed protein                                                   |     |
| Pc_TC084009 | -0.15 | 0.82  |      | -0.41 | 0.59      |      | 2.58  | 0.01      | Up   | 1.78  | 0.01  | Up   | Putative uncharacterized protein                                    |     |
| Pc_TC084016 | -0.7  | 0.52  |      | -0.53 | 0.67      |      | -2.27 | 0.14      |      | -2.96 | 0.03  | Down | Expressed protein                                                   |     |
| Pc_TC084020 | 0.43  | 0.21  |      | 0.36  | 0.42      |      | -5.92 | 6.80E-008 | Down | -1.84 | 0     | Down | Expressed protein                                                   |     |
| Pc_TC084035 | -0.56 | 0.43  |      | -0.61 | 0.46      |      | -3.08 | 0.02      | Down | -1.8  | 0.04  | Down | Expressed protein                                                   |     |
| Pc_TC084050 | -2.06 | 0.01  | Down | -1.59 | 0.06      |      | 1     | 0.35      |      | 0.18  | 0.83  |      | Expressed protein                                                   |     |
| Pc_TC084062 | -0.68 | 0.42  |      | -0.15 | 0.89      |      | -2.15 | 0.11      |      | -2.25 | 0.03  | Down | Expressed protein                                                   |     |
| Pc_TC084063 | -0.02 | 1     |      | 1.87  | 0.02      | Up   | -3.35 | 0.04      | Down | -2.65 | 0.03  | Down | Expressed protein                                                   |     |
| Pc_TC084075 | 0.1   | 0.88  |      | 1     | 0.12      |      | -2.62 | 0.03      | Down | -0.93 | 0.21  |      | Expressed protein                                                   |     |
| Pc_TC084079 | -1.35 | 0.05  |      | -0.96 | 0.23      |      | 2.27  | 0.03      | Up   | 1.19  | 0.09  |      | Expressed protein                                                   |     |
| Pc_TC084104 | -0.75 | 0.26  |      | 0.16  | 0.84      |      | -3.11 | 0.01      | Down | -1.04 | 0.19  |      | meristematic receptor-like kinase                                   |     |
| Pc_TC084105 | 0.11  | 0.86  |      | 0.55  | 0.41      |      | -2.22 | 0.05      |      | -1.58 | 0.04  | Down | meristematic receptor-like kinase                                   |     |
| Pc_TC084112 | 1.05  | 0.19  |      | 0.97  | 0.3       |      | 1.54  | 0.2       |      | 1.99  | 0.02  | Up   | T-complex protein 1 alpha subunit                                   |     |
| Pc_TC084115 | 1.25  | 0.48  |      | 1.38  | 0.45      |      | 2.03  | 0.25      |      | 2.87  | 0.02  | Up   | T-complex protein 1 alpha subunit                                   |     |
| Pc_TC084138 | 0.57  | 0.31  |      | 1.45  | 0.02      | Up   | -2.22 | 0.05      |      | -1    | 0.18  |      | Expressed protein                                                   |     |
| Pc_TC084142 | 0.54  | 0.42  |      | 0.73  | 0.34      |      | -5.56 | 0         | Down | -2.27 | 0.01  | Down | Expressed protein                                                   |     |
| Pc_TC084146 | 0.88  | 0.01  |      | 1.33  | 0         | Up   | -2.87 | 0         | Down | -0.03 | 0.95  |      | FAD-binding Berberine family protein                                |     |
| Pc_TC084148 | -0.63 | 0.19  |      | -1.22 | 0.04      | Down | 2.29  | 0.01      | Up   | 1.28  | 0.03  | Up   | Expressed protein                                                   |     |
| Pc_TC084154 | 1.58  | 0.22  |      | 1.87  | 0.16      |      | 2.78  | 0.06      |      | 3.34  | 0     | Up   | CONTAINS InterPro DOMAIN/s: Defective-in-cullin neddylation protein |     |
| Pc_TC084163 | 1.34  | 0.01  | Up   | 0.27  | 0.67      |      | 0.81  | 0.42      |      | 0.18  | 0.79  |      | Expressed protein                                                   |     |
| Pc_TC084182 | -2.06 | 0     | Down | -1.88 | 0.02      | Down | -2.68 | 0.02      | Down | -3.41 | 0     | Down | Expressed protein                                                   |     |
| Pc_TC084194 | 0.22  | 0.73  |      | -0.07 | 0.93      |      | -2.54 | 0.04      | Down | -0.97 | 0.21  |      | Expressed protein                                                   |     |
| Pc_TC084219 | 0.18  | 0.73  |      | 0.89  | 0.14      |      | -1.83 | 0.09      |      | -1.4  | 0.05  | Down | Expressed protein                                                   |     |
| Pc_TC084224 | -0.17 | 0.93  |      | -0.38 | 0.79      |      | 2.64  | 0.03      | Up   | 0.87  | 0.39  |      | Uncharacterized protein                                             |     |
| Pc_TC084233 | 0.23  | 0.66  |      | 1.2   | 0.04      | Up   | -2.21 | 0.04      | Down | -1.87 | 0.01  | Down | Expressed protein                                                   |     |
| Pc_TC084248 | 0.34  | 0.56  |      | 0.37  | 0.59      |      | -4.32 | 0         | Down | -4.94 | ##### | Down | galactinol synthase 2                                               |     |
| Pc_TC084252 | -1.24 | 0.19  |      | -0.55 | 0.6       |      | -3.63 | 0.02      | Down | -2.04 | 0.06  |      | Uncharacterized protein                                             |     |
| Pc_TC084264 | -2.73 | 0.05  | Down | -2.33 | 0.1       |      | -0.57 | 0.71      |      | -2.45 | 0.07  |      | Prolyl oligopeptidase family protein                                |     |

|             |       |       |      |       |           |      |       |           |      |       |       |      |                                                                            |
|-------------|-------|-------|------|-------|-----------|------|-------|-----------|------|-------|-------|------|----------------------------------------------------------------------------|
| Pc_TC084274 | -1.4  | 0.09  |      | -2.08 | 0.04      | Down | 0.91  | 0.42      |      | -0.08 | 0.95  |      | Putative receptor-like protein kinase 4                                    |
| Pc_TC084277 | -0.64 | 0.56  |      | -0.77 | 0.53      |      | -4.02 | 0.03      | Down | -1.31 | 0.26  |      | Expressed protein                                                          |
| Pc_TC084300 | 0.4   | 0.45  |      | 1.24  | 0.04      | Up   | -1.72 | 0.11      |      | -0.24 | 0.73  |      | Expressed protein                                                          |
| Pc_TC084304 | 2.66  | 0.31  |      | 2.06  | 0.59      |      | 4.9   | 0.01      | Up   | 3.53  | 0.09  |      | Expressed protein                                                          |
| Pc_TC084313 | -0.85 | 0.48  |      | -3.19 | 0.05      |      | 2.98  | 0.01      | Up   | 2.18  | 0.01  | Up   | Putative uncharacterized protein                                           |
| Pc_TC084317 | 0.98  | 0.09  |      | 1.01  | 0.14      |      | 0.95  | 0.37      |      | -2.02 | 0.02  | Down | Expressed protein                                                          |
| Pc_TC084328 | -2.44 | 0.02  | Down | -3.68 | 0         | Down | -1.5  | 0.26      |      | -4.11 | 0     | Down | Expressed protein                                                          |
| Pc_TC084337 | -0.05 | 1     |      | -0.01 | 1         |      | -3.44 | 0.05      | Down | -2.58 | 0.05  | Down | Expressed protein                                                          |
| Pc_TC084347 | 0.21  | 0.7   |      | -0.59 | 0.39      |      | 2.1   | 0.03      | Up   | 0.62  | 0.35  |      | Expressed protein                                                          |
| Pc_TC084352 | 0.11  | 0.92  |      | -0.58 | 0.56      |      | 2.21  | 0.05      | Up   | 0.61  | 0.48  |      | Expressed protein                                                          |
| Pc_TC084365 | 1.29  | 0.01  | Up   | 0.64  | 0.33      |      | -0.45 | 0.67      |      | 0.29  | 0.69  |      | Expressed protein                                                          |
| Pc_TC084375 | 1.17  | 0.16  |      | -0.31 | 0.82      |      | 2.18  | 0.07      |      | 2.17  | 0.01  | Up   | Expressed protein                                                          |
| Pc_TC084390 | -2.92 | 0     | Down | 0     | 4.69E-005 |      | -0.47 | 0.71      |      | -3.15 | 0     | Down | Expressed protein                                                          |
| Pc_TC084392 | 1.19  | 0.4   |      | 0.93  | 0.59      |      | 3.39  | 0.02      | Up   | 1.68  | 0.2   |      | Expressed protein                                                          |
| Pc_TC084406 | -1.42 | 0.16  |      | -3.31 | 0.02      | Down | -1.45 | 0.3       |      | -2.01 | 0.07  |      | Expressed protein                                                          |
| Pc_TC084422 | 0.85  | 0.38  |      | 0.88  | 0.42      |      | -1.58 | 0.33      |      | -3.46 | 0.03  | Down | Expressed protein                                                          |
| Pc_TC084430 | 2.15  | 0.08  |      | 2.69  | 0.03      | Up   | 0     | 0.19      |      | 0     | 0.16  |      | Expressed protein                                                          |
| Pc_TC084431 | 0.25  | 0.62  |      | 0.32  | 0.59      |      | -5.04 | 5.86E-005 | Down | -3.25 | ##### | Down | Expressed protein                                                          |
| Pc_TC084435 | 0.7   | 0.33  |      | 0.39  | 0.66      |      | 0     | 0         |      | -4.9  | 0     | Down | Expressed protein                                                          |
| Pc_TC084438 | 1.4   | 0.61  |      | 3.92  | 0.01      | Up   | 0     | 0.53      |      | 0     | 0.54  |      | Expressed protein                                                          |
| Pc_TC084441 | 1.17  | 0.12  |      | 1.81  | 0.03      | Up   | 0     | 0         |      | -2.28 | 0.05  | Down | Expressed protein                                                          |
| Pc_TC084445 | 2.1   | ##### | Up   | 0     | 6.28E-011 |      | 2     | 0.04      | Up   | 0.45  | 0.5   |      | lipase 1                                                                   |
| Pc_TC084467 | 0.12  | 0.73  |      | 0.24  | 0.61      |      | -3.68 | 0         | Down | -1.82 | 0     | Down | Expressed protein                                                          |
| Pc_TC084479 | -1.27 | 0.04  | Down | -1.74 | 0.02      | Down | -0.28 | 0.79      |      | -0.93 | 0.2   |      | Expressed protein                                                          |
| Pc_TC084480 | -0.79 | 0.36  |      | -0.16 | 0.88      |      | 2.95  | 0.01      | Up   | 1.32  | 0.1   |      | Expressed protein                                                          |
| Pc_TC084489 | -0.22 | 0.77  |      | 0.39  | 0.62      |      | -1.65 | 0.17      |      | -1.84 | 0.04  | Down | putative LINE subclass                                                     |
| Pc_TC084491 | 0.11  | 0.91  |      | -0.45 | 0.64      |      | -2.88 | 0.04      | Down | -1.41 | 0.14  |      | Expressed protein                                                          |
| Pc_TC084492 | 1.78  | 0.02  | Up   | 0.35  | 0.75      |      | 2.29  | 0.05      | Up   | 1.31  | 0.13  |      | Expressed protein                                                          |
| Pc_TC084499 | -0.26 | 0.69  |      | 0.39  | 0.58      |      | -7.42 | 1.40E-005 | Down | -2.77 | 0     | Down | Expressed protein                                                          |
| Pc_TC084509 | 0.08  | 0.88  |      | 0.72  | 0.23      |      | -3.03 | 0.01      | Down | -2.36 | 0     | Down | Expressed protein                                                          |
| Pc_TC084514 | -1.11 | 0.03  | Down | -1.44 | 0.02      | Down | 1.28  | 0.17      |      | 0.78  | 0.2   |      | cysteine-rich RLK (RECEPTOR-like protein kinase) 8                         |
| Pc_TC084515 | 0.29  | 0.53  |      | 0     | 1.25E-015 |      | -0.13 | 0.9       |      | -6.38 | ##### | Down | Expressed protein                                                          |
| Pc_TC084518 | 2.67  | ##### | Up   | 0     | 9.94E-005 |      | 1.2   | 0.3       |      | 0.37  | 0.68  |      | Expressed protein                                                          |
| Pc_TC084519 | -0.51 | 0.45  |      | -2.66 | 0         | Down | 0.63  | 0.56      |      | 0.48  | 0.52  |      | Expressed protein                                                          |
| Pc_TC084521 | 0.46  | 0.77  |      | 0.06  | 1         |      | -0.36 | 0.89      |      | 2.7   | 0.01  | Up   | Expressed protein                                                          |
| Pc_TC084522 | 2.69  | 0     | Up   | 3.31  | 0         | Up   | 2.14  | 0.12      |      | 2.98  | 0     | Up   | Expressed protein                                                          |
| Pc_TC084523 | -0.27 | 0.68  |      | -0.36 | 0.64      |      | -4.3  | 0         | Down | -1.07 | 0.17  |      | Expressed protein                                                          |
| Pc_TC084530 | -0.44 | 0.66  |      | -0.39 | 0.73      |      | -3.82 | 0.02      | Down | -3.28 | 0.01  | Down | Expressed protein                                                          |
| Pc_TC084535 | -0.62 | 0.42  |      | -2.15 | 0.03      | Down | -0.85 | 0.48      |      | -0.24 | 0.79  |      | Expressed protein                                                          |
| Pc_TC084536 | -1.61 | 0.02  | Down | -2.17 | 0.01      | Down | -0.11 | 0.93      |      | -0.51 | 0.51  |      | Expressed protein                                                          |
| Pc_TC084538 | -1.87 | 0.03  | Down | 0.41  | 0.62      |      | 1.47  | 0.18      |      | 1.14  | 0.13  |      | Expressed protein                                                          |
| Pc_TC084539 | 0.08  | 0.97  |      | -0.74 | 0.49      |      | -0.45 | 0.74      |      | -2.25 | 0.05  | Down | Expressed protein                                                          |
| Pc_TC084548 | -2.4  | 0.01  | Down | -2    | 0.05      | Down | -0.53 | 0.67      |      | -0.53 | 0.56  |      | Expressed protein                                                          |
| Pc_TC084559 | -0.11 | 0.91  |      | 0.17  | 0.86      |      | -2.5  | 0.07      |      | -2.26 | 0.02  | Down | Expressed protein                                                          |
| Pc_TC084573 | -0.04 | 0.95  |      | -0.04 | 0.95      |      | -1.99 | 0.07      |      | -1.42 | 0.04  | Down | Predicted protein                                                          |
| Pc_TC084613 | 1.4   | 0.61  |      | 2.52  | 0.2       |      | 3.67  | 0.04      | Up   | 0.95  | 0.81  |      | Expressed protein                                                          |
| Pc_TC084615 | -3.92 | 0.03  | Down | -1.13 | 0.44      |      | -0.59 | 0.73      |      | -1.05 | 0.43  |      | Expressed protein                                                          |
| Pc_TC084617 | 2.62  | 0.01  | Up   | 0.28  | 0.97      |      | 2.56  | 0.08      |      | 2.74  | 0.02  | Up   | Expressed protein                                                          |
| Pc_TC084623 | 0.51  | 0.23  |      | -0.05 | 0.94      |      | -4.98 | 1.96E-005 | Down | -1.2  | 0.05  |      | Expressed protein                                                          |
| Pc_TC084636 | 2.47  | ##### | Up   | 0     | 2.30E-005 |      | 1.66  | 0.13      |      | 0.45  | 0.59  |      | nucleoside diphosphate kinase 3                                            |
| Pc_TC084639 | 1.33  | 0.03  | Up   | 0.18  | 0.84      |      | -2.06 | 0.1       |      | 1.22  | 0.1   |      | Expressed protein                                                          |
| Pc_TC084643 | 0.51  | 0.48  |      | 0.62  | 0.45      |      | -4.2  | 0.01      | Down | -1.49 | 0.11  |      | Expressed protein                                                          |
| Pc_TC084645 | 1.11  | 0.03  | Up   | -0.32 | 0.65      |      | -0.29 | 0.79      |      | 0.41  | 0.55  |      | Expressed protein                                                          |
| Pc_TC084666 | -1.95 | ##### | Down | -0.29 | 0.6       |      | 0.39  | 0.67      |      | 0.47  | 0.42  |      | Putative uncharacterized protein                                           |
| Pc_TC084667 | -0.35 | 0.35  |      | -0.03 | 0.94      |      | -1.94 | 0.04      | Down | -1.08 | 0.05  |      | RNA-directed DNA polymerase (reverse transcriptase)-related family protein |
| Pc_TC084675 | -1.51 | 0.54  |      | 1.06  | 0.52      |      | 3.11  | 0.03      | Up   | 1.99  | 0.11  |      | Expressed protein                                                          |
| Pc_TC084676 | 1.4   | 0.4   |      | 1.23  | 0.53      |      | 2.96  | 0.06      |      | 2.87  | 0.02  | Up   | Expressed protein                                                          |
| Pc_TC084678 | 0.14  | 0.86  |      | 0.55  | 0.47      |      | -1.65 | 0.17      |      | -2.62 | 0.01  | Down | Expressed protein                                                          |
| Pc_TC084691 | -2.13 | 0.03  | Down | -1.98 | 0.08      |      | 0.22  | 0.87      |      | -0.5  | 0.61  |      | Expressed protein                                                          |
| Pc_TC084693 | -0.14 | 0.86  |      | -0.58 | 0.49      |      | -2.82 | 0.03      | Down | -2.33 | 0.01  | Down | Expressed protein                                                          |
| Pc_TC084695 | 0.82  | 0.63  |      | 2.47  | 0.04      | Up   | 0     | 0.14      |      | 1.36  | 0.33  |      | Putative uncharacterized protein                                           |
| Pc_TC084697 | -2.76 | ##### | Down | -0.76 | 0.28      |      | -1.93 | 0.08      |      | -1.89 | 0.01  | Down | Putative uncharacterized protein                                           |



|             |       |       |      |       |           |      |       |           |      |       |       |      |                                                    |
|-------------|-------|-------|------|-------|-----------|------|-------|-----------|------|-------|-------|------|----------------------------------------------------|
| Pc_TC084698 | 0.93  | 0.05  |      | 1.57  | 0.01      | Up   | -0.41 | 0.69      |      | -1.32 | 0.06  |      | Expressed protein                                  |
| Pc_TC084700 | 0.02  | 1     |      | -0.24 | 0.86      |      | -3.67 | 0.03      | Down | -2.32 | 0.05  |      | Expressed protein                                  |
| Pc_TC084707 | 1.97  | 0.01  | Up   | 0     | 0.01      |      | 1.37  | 0.28      |      | 0.21  | 0.88  |      | Expressed protein                                  |
| Pc_TC084710 | -1.14 | 0.12  |      | -0.45 | 0.58      |      | -2.96 | 0.02      | Down | -1.94 | 0.03  | Down | Expressed protein                                  |
| Pc_TC084732 | -0.31 | 0.65  |      | -1.17 | 0.15      |      | 0.9   | 0.4       |      | 1.77  | 0.01  | Up   | Uncharacterized protein (Fragment)                 |
| Pc_TC084737 | 1.08  | 0.06  |      | 1.3   | 0.05      | Up   | -2.03 | 0.08      |      | -0.44 | 0.56  |      | Uncharacterized protein                            |
| Pc_TC084743 | 0.14  | 0.93  |      | 0.11  | 0.95      |      | -3.56 | 0.04      | Down | -0.32 | 0.79  |      | Expressed protein                                  |
| Pc_TC084769 | -0.85 | 0.14  |      | -1.73 | 0.02      | Down | 0.1   | 0.92      |      | -0.65 | 0.35  |      | Expressed protein                                  |
| Pc_TC084783 | 0.1   | 0.84  |      | -0.22 | 0.73      |      | -2.81 | 0.01      | Down | -0.84 | 0.2   |      | Expressed protein                                  |
| Pc_TC084801 | -1.75 | 0.02  | Down | -0.57 | 0.48      |      | 0.93  | 0.39      |      | 0.16  | 0.85  |      | Uncharacterized protein                            |
| Pc_TC084804 | -1.15 | 0.05  | Down | -0.32 | 0.63      |      | 0.68  | 0.5       |      | 0.27  | 0.69  |      | Expressed protein                                  |
| Pc_TC084829 | -2.41 | 0.04  | Down | -2.75 | 0.04      | Down | -1.72 | 0.23      |      | -1.48 | 0.18  |      | Putative uncharacterized protein                   |
| Pc_TC084836 | 0.42  | 0.37  |      | 0.71  | 0.21      |      | -2.43 | 0.02      | Down | -0.74 | 0.26  |      | Expressed protein                                  |
| Pc_TC084857 | 0.93  | 0.12  |      | 1.81  | 0.01      | Up   | -4.06 | 0         | Down | -0.71 | 0.38  |      | Expressed protein                                  |
| Pc_TC084858 | 0.8   | 0.12  |      | 1.25  | 0.04      | Up   | -3.67 | 0         | Down | 0.18  | 0.8   |      | Expressed protein                                  |
| Pc_TC084867 | 0.87  | 0.08  |      | 1.09  | 0.07      |      | -2.86 | 0.01      | Down | -1.12 | 0.11  |      | Expressed protein                                  |
| Pc_TC084868 | -0.84 | 0.37  |      | -1.33 | 0.22      |      | -0.73 | 0.59      |      | -2.29 | 0.04  | Down | leo1-like family protein                           |
| Pc_TC084870 | -1.36 | 0.06  |      | -1.8  | 0.04      | Down | 0.09  | 0.94      |      | -0.75 | 0.35  |      | Expressed protein                                  |
| Pc_TC084871 | 1.52  | 0.1   |      | -1.75 | 0.28      |      | 0.91  | 0.53      |      | 2.07  | 0.03  | Up   | HEAT repeat ;HECT-domain (ubiquitin-transferase)   |
| Pc_TC084872 | -3.99 | ##### | Down | -1.25 | 0.14      |      | 0.04  | 0.98      |      | -0.91 | 0.26  |      | HEAT repeat ;HECT-domain (ubiquitin-transferase)   |
| Pc_TC084873 | 0.66  | 0.44  |      | 1.97  | 0.02      | Up   | 0.8   | 0.53      |      | 0.48  | 0.63  |      | HEAT repeat ;HECT-domain (ubiquitin-transferase)   |
| Pc_TC084874 | -2.16 | 0.01  | Down | -1.03 | 0.24      |      | -0.26 | 0.83      |      | 0.44  | 0.58  |      | HEAT repeat ;HECT-domain (ubiquitin-transferase)   |
| Pc_TC084875 | 1.4   | 0.05  | Up   | 0.28  | 0.78      |      | 1.02  | 0.39      |      | 0.83  | 0.34  |      | HEAT repeat ;HECT-domain (ubiquitin-transferase)   |
| Pc_TC084878 | -1.73 | 0.24  |      | -0.94 | 0.54      |      | -0.72 | 0.68      |      | -4.18 | 0.03  | Down | HEAT repeat ;HECT-domain (ubiquitin-transferase)   |
| Pc_TC084884 | 2.68  | 0     | Up   | 0     | 0.01      |      | 1.9   | 0.13      |      | 0.55  | 0.62  |      | Ribosomal L38e protein family                      |
| Pc_TC084898 | 0.57  | 0.43  |      | 0.4   | 0.64      |      | -3.39 | 0.02      | Down | -1.22 | 0.18  |      | Putative uncharacterized protein OSJNBb0050B07.3   |
| Pc_TC084911 | -1.06 | 0.19  |      | -0.72 | 0.42      |      | 2.57  | 0.02      | Up   | 1.15  | 0.14  |      | Expressed protein                                  |
| Pc_TC084923 | -0.05 | 0.96  |      | -0.91 | 0.27      |      | 2.2   | 0.04      | Up   | 1.1   | 0.13  |      | Expressed protein                                  |
| Pc_TC084940 | -0.05 | 0.93  |      | 1.08  | 0.06      |      | -3.93 | 0         | Down | -2.81 | 0     | Down | Expressed protein                                  |
| Pc_TC084943 | 1.76  | 0.05  | Up   | 0     | 0.02      |      | 1.53  | 0.25      |      | 0.82  | 0.47  |      | Expressed protein                                  |
| Pc_TC084944 | 2.18  | 0.01  | Up   | 0     | 0.01      |      | 1.17  | 0.38      |      | -0.22 | 0.89  |      | Expressed protein                                  |
| Pc_TC084945 | 2.12  | 0     | Up   | 0     | 1.33E-005 |      | 1.81  | 0.1       |      | -0.3  | 0.74  |      | Expressed protein                                  |
| Pc_TC084956 | -2.27 | 0.01  | Down | -2.81 | 0.01      | Down | -2    | 0.12      |      | -2.24 | 0.02  | Down | Expressed protein                                  |
| Pc_TC084957 | -2.12 | 0.02  | Down | 0.13  | 0.89      |      | -1.52 | 0.22      |      | -0.03 | 1     |      | Expressed protein                                  |
| Pc_TC084960 | 1.74  | 0.01  | Up   | 1.51  | 0.05      |      | 1.51  | 0.18      |      | 1.33  | 0.09  |      | Expressed protein                                  |
| Pc_TC084964 | 1.11  | 0.03  | Up   | -0.01 | 0.99      |      | 0.36  | 0.73      |      | 0.42  | 0.54  |      | Expressed protein                                  |
| Pc_TC084972 | -2.92 | 0.21  |      | 0.76  | 0.63      |      | 2.95  | 0.03      | Up   | 1.33  | 0.29  |      | Expressed protein                                  |
| Pc_TC084993 | 0.34  | 0.59  |      | 0.76  | 0.27      |      | -2.04 | 0.08      |      | -1.92 | 0.02  | Down | Uncharacterized protein                            |
| Pc_TC084997 | -3.14 | 0.01  | Down | -0.94 | 0.41      |      | -1.98 | 0.18      |      | -1.72 | 0.13  |      | Uncharacterized protein                            |
| Pc_TC084998 | 0.71  | 0.13  |      | 1.12  | 0.05      | Up   | 0.19  | 0.85      |      | 0.4   | 0.52  |      | Expressed protein                                  |
| Pc_TC084999 | 0.66  | 0.81  |      | -0.36 | 1         |      | 2.03  | 0.25      |      | 2.8   | 0.03  | Up   | Uncharacterized protein                            |
| Pc_TC085006 | 0.2   | 0.81  |      | -2.11 | 0.05      | Down | 1.03  | 0.37      |      | -2.54 | 0.02  | Down | cysteine-rich RLK (RECEPTOR-like protein kinase) 8 |
| Pc_TC085007 | -3.92 | 0.03  | Down | -0.24 | 0.9       |      | -0.69 | 0.68      |      | -0.05 | 1     |      | Expressed protein                                  |
| Pc_TC085021 | -7.34 | ##### | Down | -7.36 | 1.95E-009 | Down | -6.33 | 1.49E-005 | Down | -6.79 | ##### | Down | Uncharacterized protein                            |
| Pc_TC085022 | -2.02 | 0     | Down | 1.5   | 0.02      | Up   | -0.69 | 0.52      |      | -1.92 | 0.01  | Down | Expressed protein                                  |
| Pc_TC085035 | 0     | ##### |      | 0     | 9.09E-010 |      | -0.85 | 0.43      |      | -3.11 | 0     | Down | Expressed protein                                  |
| Pc_TC085048 | -1.83 | 0     | Down | -2.06 | 0         | Down | 1.5   | 0.12      |      | -0.51 | 0.44  |      | Expressed protein                                  |
| Pc_TC085061 | -1.1  | 0.21  |      | -2.56 | 0.02      | Down | -0.4  | 0.76      |      | -0.55 | 0.56  |      | Expressed protein                                  |
| Pc_TC085071 | 0.26  | 0.67  |      | 1.45  | 0.02      | Up   | -0.82 | 0.45      |      | -0.66 | 0.38  |      | Os07g0118900 protein                               |
| Pc_TC085075 | 0     | ##### |      | -2.43 | 0.02      | Down | 0     | 0         |      | 0     | ##### |      | Expressed protein                                  |
| Pc_TC085090 | -1.04 | 0.07  |      | -2.36 | 0         | Down | 1.03  | 0.3       |      | 0.36  | 0.59  |      | Expressed protein                                  |
| Pc_TC085092 | 1.78  | 0.01  | Up   | 2.46  | 0         | Up   | 3.53  | 0         | Up   | 3.78  | ##### | Up   | Expressed protein                                  |
| Pc_TC085098 | 2.26  | ##### | Up   | 0     | 6.03E-006 |      | 2.48  | 0.02      | Up   | 1.37  | 0.07  |      | Putative reverse transcriptase                     |
| Pc_TC085100 | 2.15  | ##### | Up   | 0     | 3.96E-008 |      | 2.05  | 0.05      | Up   | -2.28 | 0.01  | Down | Expressed protein                                  |
| Pc_TC085102 | 0.04  | 0.97  |      | 1.4   | 0.04      | Up   | -2.8  | 0.03      | Down | -1.77 | 0.04  | Down | Expressed protein                                  |
| Pc_TC085104 | 2.05  | 0     | Up   | 0.87  | 0.22      |      | 1.95  | 0.06      |      | 1.29  | 0.07  |      | Expressed protein                                  |
| Pc_TC085108 | -2.4  | ##### | Down | -0.36 | 0.57      |      | -1.02 | 0.32      |      | -0.09 | 0.89  |      | Expressed protein                                  |
| Pc_TC085119 | -2    | 0.01  | Down | -3.6  | 0         | Down | 1.36  | 0.2       |      | -0.79 | 0.34  |      | Pentatricopeptide repeat (PPR) superfamily protein |
| Pc_TC085121 | -1.57 | 0.04  | Down | -0.73 | 0.39      |      | 0.8   | 0.47      |      | 0.02  | 0.99  |      | Putative uncharacterized protein OSJNBb0089F16.20  |
| Pc_TC085123 | -2.22 | 0     | Down | -1.84 | 0.03      | Down | 0.46  | 0.67      |      | 0.18  | 0.81  |      | Putative uncharacterized protein OSJNBb0089F16.20  |
| Pc_TC085124 | -0.73 | 0.23  |      | -2.75 | 0         | Down | -0.41 | 0.7       |      | -3.25 | 0     | Down | Putative uncharacterized protein OSJNBb0089F16.20  |
| Pc_TC085126 | 0.16  | 0.8   |      | -0.39 | 0.6       |      | 2.2   | 0.03      | Up   | 1.02  | 0.14  |      | Putative uncharacterized protein OSJNBb0089F16.20  |

|             |       |       |      |       |           |      |       |           |      |       |       |      |                                                                          |
|-------------|-------|-------|------|-------|-----------|------|-------|-----------|------|-------|-------|------|--------------------------------------------------------------------------|
| Pc_TC085128 | 0.99  | 0.09  |      | 0.84  | 0.22      |      | 0.75  | 0.48      |      | 1.47  | 0.03  | Up   | Expressed protein                                                        |
| Pc_TC085130 | -3.92 | 0.03  | Down | -1.36 | 0.36      |      | -0.69 | 0.68      |      | 0.21  | 0.9   |      | Protein kinase family protein with leucine-rich repeat domain            |
| Pc_TC085144 | -0.81 | 0.58  |      | -1.06 | 0.51      |      | -0.61 | 0.74      |      | -4.08 | 0.04  | Down | Expressed protein                                                        |
| Pc_TC085149 | -2.41 | 0.04  | Down | -0.5  | 0.66      |      | 1.34  | 0.27      |      | 0.99  | 0.27  |      | Expressed protein                                                        |
| Pc_TC085154 | -0.4  | 0.48  |      | -1.41 | 0.05      | Down | 1.38  | 0.16      |      | 0.84  | 0.2   |      | Expressed protein                                                        |
| Pc_TC085171 | -1.08 | 0.2   |      | -3.23 | 0.01      | Down | -2.2  | 0.1       |      | -1.99 | 0.04  | Down | Expressed protein                                                        |
| Pc_TC085196 | -1.72 | 0     | Down | -1.55 | 0.02      | Down | 2.35  | 0.01      | Up   | 0.85  | 0.17  |      | Expressed protein                                                        |
| Pc_TC085218 | 2.27  | 0.03  | Up   | 0.06  | 1         |      | 0.5   | 0.83      |      | -1.18 | 0.57  |      | Expressed protein                                                        |
| Pc_TC085229 | 0.86  | 0.08  |      | 1.43  | 0.01      | Up   | -1.55 | 0.15      |      | -0.64 | 0.35  |      | Expressed protein                                                        |
| Pc_TC085233 | 0.54  | 0.35  |      | 1.65  | 0.01      | Up   | -2.44 | 0.04      | Down | 0.11  | 0.88  |      | Expressed protein                                                        |
| Pc_TC085239 | 0.44  | 0.43  |      | 0.39  | 0.56      |      | -2.6  | 0.02      | Down | -1.1  | 0.14  |      | Expressed protein                                                        |
| Pc_TC085247 | -0.22 | 0.73  |      | -0.68 | 0.36      |      | 2.59  | 0.01      | Up   | 1.23  | 0.07  |      | Expressed protein                                                        |
| Pc_TC085248 | 0.01  | 1     |      | -0.33 | 0.68      |      | -2.08 | 0.08      |      | -2.06 | 0.02  | Down | Expressed protein                                                        |
| Pc_TC085257 | -3.19 | 0.01  | Down | 0.11  | 0.95      |      | 0.35  | 0.8       |      | -0.23 | 0.84  |      | gag protein                                                              |
| Pc_TC085264 | -1.08 | 0.23  |      | -1.38 | 0.19      |      | 2.26  | 0.04      | Up   | 1.75  | 0.03  | Up   | Expressed protein                                                        |
| Pc_TC085269 | 3.27  | 0     | Up   | 0     | 0.15      |      | 2.55  | 0.08      |      | 0.99  | 0.5   |      | Expressed protein                                                        |
| Pc_TC085280 | -2.51 | 0.01  | Down | -3.7  | 0         | Down | -5.25 | 0         | Down | 0     | ##### |      | Expressed protein                                                        |
| Pc_TC085291 | 0.18  | 0.68  |      | 0.12  | 0.82      |      | -3.89 | 0         | Down | -1.46 | 0.02  | Down | Expressed protein                                                        |
| Pc_TC085297 | 1.12  | 0.01  | Up   | 0.84  | 0.12      |      | 0.45  | 0.64      |      | -0.66 | 0.3   |      | pleckstrin homology (PH) domain-containing protein                       |
| Pc_TC085317 | -3.17 | 0.04  | Down | -0.49 | 0.72      |      | -0.5  | 0.76      |      | -0.82 | 0.51  |      | Expressed protein                                                        |
| Pc_TC085338 | -0.57 | 0.39  |      | -2.44 | 0.01      | Down | -1.17 | 0.3       |      | 0.53  | 0.47  |      | Os02g0464500 protein                                                     |
| Pc_TC085344 | -0.1  | 0.89  |      | 0.35  | 0.63      |      | -6.17 | 9.11E-005 | Down | -1.56 | 0.05  |      | Expressed protein                                                        |
| Pc_TC085350 | 0.23  | 0.73  |      | 0.29  | 0.7       |      | -3.1  | 0.01      | Down | -0.75 | 0.34  |      | Expressed protein                                                        |
| Pc_TC085357 | 0.33  | 0.47  |      | 0.2   | 0.73      |      | -2.8  | 0.01      | Down | -1.05 | 0.1   |      | Expressed protein                                                        |
| Pc_TC085365 | 0.42  | 0.4   |      | 0.27  | 0.66      |      | -2.12 | 0.05      | Down | -1.77 | 0.01  | Down | Expressed protein                                                        |
| Pc_TC085368 | 0.44  | 0.32  |      | 0.27  | 0.63      |      | -3.03 | 0         | Down | -2.33 | 0     | Down | Expressed protein                                                        |
| Pc_TC085370 | -3.92 | 0.03  | Down | 0.52  | 0.68      |      | 0     | 0.01      |      | -2.79 | 0.07  |      | heat shock protein 70                                                    |
| Pc_TC085371 | -3.78 | 0.01  | Down | 0.81  | 0.38      |      | -0.15 | 0.93      |      | -0.77 | 0.47  |      | Expressed protein                                                        |
| Pc_TC085375 | -2.62 | 0.03  | Down | -1.64 | 0.18      |      | -0.07 | 0.99      |      | -0.12 | 0.94  |      | Expressed protein                                                        |
| Pc_TC085409 | 0.53  | 0.43  |      | 1.27  | 0.08      |      | -3.73 | 0.01      | Down | -3.83 | 0     | Down | Expressed protein                                                        |
| Pc_TC085418 | 1.89  | 0.38  |      | 3.64  | 0.02      | Up   | 2.67  | 0.2       |      | 3.21  | 0.04  | Up   | Expressed protein                                                        |
| Pc_TC085452 | 0.27  | 0.76  |      | 0.81  | 0.36      |      | -3.04 | 0.04      | Down | -0.5  | 0.62  |      | endoplasmic reticulum-type calcium-transporting ATPase 3                 |
| Pc_TC085461 | 0.55  | 0.46  |      | 1.66  | 0.03      | Up   | 0     | 0         |      | -1.41 | 0.14  |      | Expressed protein                                                        |
| Pc_TC085465 | 0.2   | 0.66  |      | 0.53  | 0.34      |      | -1.35 | 0.18      |      | -1.38 | 0.03  | Down | Putative uncharacterized protein                                         |
| Pc_TC085469 | 3.99  | ##### | Up   | 0     | 1.02E-005 |      | 4.62  | 1.16E-005 | Up   | 0.25  | 0.77  |      | Expressed protein                                                        |
| Pc_TC085476 | 0.63  | 0.2   |      | 0.21  | 0.74      |      | -2.19 | 0.04      | Down | 0.79  | 0.21  |      | Expressed protein                                                        |
| Pc_TC085512 | -2.21 | 0.02  | Down | 0.75  | 0.36      |      | 0     | 1         |      | -0.67 | 0.46  |      | Uncharacterized protein                                                  |
| Pc_TC085517 | -0.36 | 0.78  |      | -4.19 | 0.03      | Down | 1.43  | 0.26      |      | 1.24  | 0.2   |      | P-loop containing nucleoside triphosphate hydrolases superfamily protein |
| Pc_TC085533 | 0.08  | 0.99  |      | -1.4  | 0.28      |      | -1.5  | 0.32      |      | -2.83 | 0.04  | Down | Expressed protein                                                        |
| Pc_TC085548 | 0.4   | 0.68  |      | -0.83 | 0.49      |      | 2.39  | 0.04      | Up   | 0.97  | 0.3   |      | Probable protein phosphatase 2C 50                                       |
| Pc_TC085549 | 1.08  | 0.25  |      | 2.31  | 0.01      | Up   | -4.5  | 0.04      | Down | -1.57 | 0.25  |      | Expressed protein                                                        |
| Pc_TC085552 | -2.62 | 0.01  | Down | -0.53 | 0.6       |      | -0.46 | 0.73      |      | -1.08 | 0.27  |      | Antennal binding protein                                                 |
| Pc_TC085553 | 1.91  | 0.02  | Up   | 0     | 0.01      |      | 0.79  | 0.57      |      | -0.09 | 0.99  |      | Expressed protein                                                        |
| Pc_TC085569 | 0.72  | 0.36  |      | 1.06  | 0.23      |      | -4.5  | 0.01      | Down | -1.92 | 0.08  |      | Expressed protein                                                        |
| Pc_TC085570 | 0.08  | 0.94  |      | -0.26 | 0.78      |      | 2.14  | 0.05      | Up   | 1.32  | 0.08  |      | Expressed protein                                                        |
| Pc_TC085571 | 1.77  | 0.01  | Up   | 2.72  | 0         | Up   | 0.99  | 0.4       |      | 0     | 1     |      | Expressed protein                                                        |
| Pc_TC085572 | -0.51 | 0.17  |      | 0.07  | 0.88      |      | -3.6  | 0         | Down | -2.68 | ##### | Down | Expressed protein                                                        |
| Pc_TC085573 | 0.91  | 0.03  |      | 1.89  | 0         | Up   | -6.31 | 7.82E-007 | Down | -1.58 | 0.01  | Down | Expressed protein                                                        |
| Pc_TC085574 | 0.46  | 0.16  |      | 0.44  | 0.29      |      | -4.07 | 3.10E-005 | Down | -1.57 | 0     | Down | Expressed protein                                                        |
| Pc_TC085579 | 1.53  | 0.01  | Up   | 0     | 7.04E-008 |      | 1     | 0.34      |      | -0.08 | 0.92  |      | Lactate/malate dehydrogenase family protein                              |
| Pc_TC085588 | 0.69  | 0.21  |      | 1.33  | 0.04      | Up   | -3.58 | 0         | Down | -2.1  | 0.01  | Down | Expressed protein                                                        |
| Pc_TC085604 | 1.13  | 0.14  |      | 0.01  | 1         |      | -3.82 | 0.02      | Down | -0.28 | 0.8   |      | alanine:glyoxylate aminotransferase 3                                    |
| Pc_TC085618 | -0.1  | 0.88  |      | 0.94  | 0.15      |      | -3.35 | 0.01      | Down | -0.89 | 0.23  |      | Expressed protein                                                        |
| Pc_TC085626 | -2.18 | 0.01  | Down | -2.9  | 0.01      | Down | 0.98  | 0.37      |      | -0.74 | 0.39  |      | EF-TU receptor                                                           |
| Pc_TC085631 | 0.32  | 0.57  |      | 0.55  | 0.4       |      | -2.57 | 0.03      | Down | -2.61 | 0     | Down | Os04g0423600 protein                                                     |
| Pc_TC085635 | 0.58  | 0.31  |      | 0.43  | 0.53      |      | -2.29 | 0.05      | Down | 0.25  | 0.73  |      | Expressed protein                                                        |
| Pc_TC085637 | -0.95 | 0.17  |      | -0.82 | 0.3       |      | -1.85 | 0.12      |      | -2.58 | 0     | Down | Expressed protein                                                        |
| Pc_TC085642 | 0.26  | 0.57  |      | 0.77  | 0.16      |      | -2.38 | 0.02      | Down | -1.12 | 0.08  |      | Expressed protein                                                        |
| Pc_TC085643 | 0.78  | 0.14  |      | 0.94  | 0.13      |      | -5.88 | 3.27E-005 | Down | -2.59 | 0     | Down | Expressed protein                                                        |
| Pc_TC085649 | 0.54  | 0.18  |      | 0.93  | 0.06      |      | -2.75 | 0.01      | Down | -1.02 | 0.09  |      | Expressed protein                                                        |
| Pc_TC085650 | 0.63  | 0.1   |      | 0.61  | 0.2       |      | -2.79 | 0.01      | Down | -1.42 | 0.02  | Down | Expressed protein                                                        |
| Pc_TC085655 | -3.09 | 0.04  | Down | -1.11 | 0.42      |      | 0.03  | 1         |      | -0.15 | 0.94  |      | DNA-directed RNA polymerase                                              |

|             |       |       |      |       |           |      |       |           |      |       |       |      |                                                                           |
|-------------|-------|-------|------|-------|-----------|------|-------|-----------|------|-------|-------|------|---------------------------------------------------------------------------|
| Pc_TC085661 | 0.34  | 0.56  |      | 0.23  | 0.74      |      | -3.28 | 0.01      | Down | -1.81 | 0.02  | Down | Expressed protein                                                         |
| Pc_TC085665 | 0.42  | 0.41  |      | 0.86  | 0.15      |      | -2.31 | 0.04      | Down | -1.57 | 0.03  | Down | Expressed protein                                                         |
| Pc_TC085678 | -1.34 | 0.23  |      | -1.36 | 0.27      |      | -1.5  | 0.31      |      | -4.96 | 0     | Down | Expressed protein                                                         |
| Pc_TC085682 | 1.78  | 0     | Up   | 0     | 2.00E-005 |      | 2.69  | 0.01      | Up   | 1.1   | 0.16  |      | Expressed protein                                                         |
| Pc_TC085685 | 0.49  | 0.27  |      | 0.54  | 0.32      |      | -2.16 | 0.04      | Down | -1.52 | 0.02  | Down | Chitin synthase                                                           |
| Pc_TC085695 | 0.89  | 0.19  |      | 1.27  | 0.1       |      | -3.14 | 0.03      | Down | -3.02 | 0     | Down | Expressed protein                                                         |
| Pc_TC085697 | 0.23  | 0.74  |      | 0.8   | 0.27      |      | -3.19 | 0.01      | Down | -2.68 | 0     | Down | Expressed protein                                                         |
| Pc_TC085702 | 2.51  | 0.03  | Up   | 1.74  | 0.24      |      | 2.85  | 0.06      |      | 2     | 0.13  |      | Expressed protein                                                         |
| Pc_TC085714 | 0.29  | 0.68  |      | 0.18  | 0.84      |      | -4.04 | 0         | Down | -1.26 | 0.14  |      | Expressed protein                                                         |
| Pc_TC085716 | -0.14 | 0.81  |      | -0.13 | 0.85      |      | -1.97 | 0.08      |      | -2.54 | 0     | Down | Expressed protein                                                         |
| Pc_TC085721 | 0.69  | 0.38  |      | 0.46  | 0.63      |      | -0.94 | 0.48      |      | -2.46 | 0.03  | Down | Expressed protein                                                         |
| Pc_TC085735 | -1.92 | 0.1   |      | 1.95  | 0.02      | Up   | -0.5  | 0.74      |      | -0.87 | 0.44  |      | NADH dehydrogenase 5B                                                     |
| Pc_TC085739 | 0.48  | 0.1   |      | 0.86  | 0.02      |      | -4.57 | 1.37E-006 | Down | -2.16 | ##### | Down | Expressed protein                                                         |
| Pc_TC085755 | -1.42 | 0.28  |      | 0.22  | 0.9       |      | -4.58 | 0.03      | Down | -3.46 | 0.03  | Down | Expressed protein                                                         |
| Pc_TC085756 | -1.35 | 0.03  | Down | -0.58 | 0.42      |      | -0.09 | 0.93      |      | 0.08  | 0.92  |      | Expressed protein                                                         |
| Pc_TC085767 | 0.69  | 0.49  |      | 0.88  | 0.42      |      | -1.26 | 0.44      |      | -3.46 | 0.03  | Down | Expressed protein                                                         |
| Pc_TC085774 | 0.19  | 0.73  |      | -0.03 | 0.97      |      | -2.96 | 0.01      | Down | -0.99 | 0.16  |      | Expressed protein                                                         |
| Pc_TC085775 | 0.08  | 0.89  |      | 0.89  | 0.15      |      | -2.03 | 0.06      |      | -1.48 | 0.04  | Down | Expressed protein                                                         |
| Pc_TC085797 | 0.34  | 0.55  |      | -0.38 | 0.59      |      | -1.34 | 0.22      |      | -1.47 | 0.05  | Down | Expressed protein                                                         |
| Pc_TC085800 | 0.38  | 0.19  |      | 0.52  | 0.16      |      | -2.8  | 0         | Down | -1.84 | 0     | Down | Expressed protein                                                         |
| Pc_TC085803 | 0.26  | 0.68  |      | 0.72  | 0.3       |      | -2.38 | 0.05      | Down | -0.87 | 0.26  |      | Expressed protein                                                         |
| Pc_TC085826 | 1.28  | 0.24  |      | 2.52  | 0.01      | Up   | -0.65 | 0.76      |      | 1.06  | 0.39  |      | cysteine-rich RLK (RECEPTOR-like protein kinase) 8                        |
| Pc_TC085832 | -0.06 | 0.95  |      | -0.19 | 0.84      |      | -3.17 | 0.02      | Down | -1.98 | 0.03  | Down | Expressed protein                                                         |
| Pc_TC085840 | 0.34  | 0.37  |      | 0.09  | 0.85      |      | -1.53 | 0.1       |      | -2.63 | ##### | Down | Expressed protein                                                         |
| Pc_TC085862 | 0.58  | 0.23  |      | 1.18  | 0.04      | Up   | -2.94 | 0.01      | Down | -1.11 | 0.1   |      | Expressed protein                                                         |
| Pc_TC085886 | 0.97  | 0.49  |      | 0.25  | 0.97      |      | 3.07  | 0.03      | Up   | 2.03  | 0.09  |      | Expressed protein                                                         |
| Pc_TC085888 | -3.28 | 0     | Down | -1.71 | 0.1       |      | -5.85 | 0         | Down | -2.41 | 0.02  | Down | ABC transporter family protein                                            |
| Pc_TC085899 | -0.46 | 0.42  |      | -1.14 | 0.1       |      | -1.22 | 0.25      |      | -1.85 | 0.01  | Down | Expressed protein                                                         |
| Pc_TC085903 | -2.46 | 0.03  | Down | -1.63 | 0.17      |      | -1.03 | 0.46      |      | -1.91 | 0.09  |      | Expressed protein                                                         |
| Pc_TC085906 | 0.81  | 0.18  |      | 0.5   | 0.49      |      | -0.04 | 0.98      |      | 1.54  | 0.03  | Up   | Uncharacterized protein                                                   |
| Pc_TC085917 | -0.84 | 0.27  |      | -2.29 | 0.02      | Down | 1.53  | 0.16      |      | 0.64  | 0.41  |      | Expressed protein                                                         |
| Pc_TC085924 | -0.91 | 0.11  |      | -1.83 | 0.01      | Down | 1.7   | 0.08      |      | 0.94  | 0.14  |      | rubisco activase                                                          |
| Pc_TC085925 | -0.66 | 0.11  |      | -1.64 | 0         | Down | 1.92  | 0.03      | Up   | 1.15  | 0.03  | Up   | rubisco activase                                                          |
| Pc_TC085926 | -0.17 | 0.68  |      | -1.92 | 0         | Down | 1.4   | 0.11      |      | 1.08  | 0.05  | Up   | rubisco activase                                                          |
| Pc_TC085927 | -0.34 | 0.27  |      | -1.58 | 0         | Down | 1.58  | 0.06      |      | 1     | 0.04  |      | rubisco activase                                                          |
| Pc_TC085933 | 1.11  | 0.05  | Up   | 0.2   | 0.79      |      | -0.3  | 0.78      |      | 0.87  | 0.21  |      | Expressed protein                                                         |
| Pc_TC085937 | 0.19  | 0.84  |      | 1     | 0.24      |      | -0.62 | 0.64      |      | -2.58 | 0.02  | Down | Expressed protein                                                         |
| Pc_TC085938 | -0.04 | 0.96  |      | -1.9  | 0.01      | Down | -0.58 | 0.58      |      | 0.79  | 0.24  |      | S-adenosyl-L-methionine-dependent methyl transferases superfamily protein |
| Pc_TC085939 | 0.12  | 0.92  |      | 1.5   | 0.07      |      | 2.28  | 0.04      | Up   | 1.83  | 0.02  | Up   | Expressed protein                                                         |
| Pc_TC085941 | 2.9   | ##### | Up   | 3.78  | 1.01E-007 | Up   | 2.92  | 0.01      | Up   | 2.33  | 0     | Up   | S-adenosyl-L-methionine-dependent methyl transferases superfamily protein |
| Pc_TC085947 | 3.54  | 0.08  |      | 1.64  | 0.75      |      | 6.03  | 0         | Up   | 2.63  | 0.32  |      | Expressed protein                                                         |
| Pc_TC085961 | -0.29 | 0.66  |      | -0.22 | 0.78      |      | 0     | 9.72E-006 |      | -3.17 | 0     | Down | Expressed protein                                                         |
| Pc_TC085969 | 1.28  | 0.01  | Up   | 0.47  | 0.47      |      | 1     | 0.32      |      | 0.7   | 0.29  |      | Protein kinase-3                                                          |
| Pc_TC085978 | 0.97  | 0.15  |      | 1.25  | 0.1       |      | -3.47 | 0.01      | Down | -0.48 | 0.58  |      | Expressed protein                                                         |
| Pc_TC085990 | 0.31  | 0.69  |      | 0.27  | 0.78      |      | -0.94 | 0.46      |      | -2.7  | 0.01  | Down | Expressed protein                                                         |
| Pc_TC085991 | 0.72  | 0.2   |      | 0.76  | 0.26      |      | 0.39  | 0.71      |      | 1.88  | 0     | Up   | Expressed protein                                                         |
| Pc_TC086007 | 0.1   | 0.86  |      | 0.59  | 0.35      |      | -2.42 | 0.03      | Down | -2.37 | 0     | Down | Expressed protein                                                         |
| Pc_TC086023 | 0.28  | 0.68  |      | 0.35  | 0.65      |      | -4.5  | 0         | Down | -3    | 0     | Down | Expressed protein                                                         |
| Pc_TC086030 | 0.93  | 0.24  |      | 1.64  | 0.05      | Up   | -1.08 | 0.43      |      | 0.97  | 0.28  |      | Expressed protein                                                         |
| Pc_TC086051 | 0.58  | 0.38  |      | 0.24  | 0.78      |      | -2.66 | 0.04      | Down | -1.92 | 0.03  | Down | Expressed protein                                                         |
| Pc_TC086067 | -0.09 | 0.86  |      | 0.8   | 0.15      |      | -2.99 | 0.01      | Down | -3.66 | ##### | Down | Expressed protein                                                         |
| Pc_TC086069 | -0.74 | 0.37  |      | -0.14 | 0.9       |      | -0.85 | 0.5       |      | -2.09 | 0.04  | Down | serine hydroxymethyltransferase 7                                         |
| Pc_TC086072 | 0.23  | 0.62  |      | 0.41  | 0.47      |      | -2.06 | 0.05      | Down | -1.76 | 0.01  | Down | Expressed protein                                                         |
| Pc_TC086082 | -1.01 | 0.18  |      | -1.9  | 0.04      | Down | 0.61  | 0.58      |      | -0.06 | 0.96  |      | Expressed protein                                                         |
| Pc_TC086083 | -2.05 | 0.05  | Down | -3.07 | 0.02      | Down | 2.14  | 0.06      |      | 0.54  | 0.55  |      | Expressed protein                                                         |
| Pc_TC086084 | -3.69 | 0     | Down | -2.49 | 0.03      | Down | 1.9   | 0.09      |      | 1.01  | 0.22  |      | Expressed protein                                                         |
| Pc_TC086087 | 0.89  | 0.1   |      | 1.88  | 0         | Up   | -4.01 | 0         | Down | -1.58 | 0.04  | Down | Expressed protein                                                         |
| Pc_TC086096 | 3.47  | 0     | Up   | 0     | 0.2       |      | 1.09  | 0.56      |      | 0.36  | 0.91  |      | proteasome subunit PAB1                                                   |
| Pc_TC086104 | 0.21  | 0.58  |      | 0.55  | 0.25      |      | -3.33 | 0         | Down | -2.17 | 0     | Down | RING-type Zinc finger protein                                             |
| Pc_TC086110 | 0.95  | 0.02  |      | 0.7   | 0.19      |      | -1.93 | 0.06      |      | -1.3  | 0.04  | Down | Expressed protein                                                         |
| Pc_TC086120 | 0.11  | 0.82  |      | -0.39 | 0.51      |      | -3.84 | 0         | Down | -2.63 | 0     | Down | Expressed protein                                                         |
| Pc_TC086121 | 0.32  | 0.62  |      | 0.67  | 0.36      |      | -3.92 | 0         | Down | -2.99 | 0     | Down | Expressed protein                                                         |

|             |       |       |      |       |           |      |       |           |      |       |       |      |                                                          |
|-------------|-------|-------|------|-------|-----------|------|-------|-----------|------|-------|-------|------|----------------------------------------------------------|
| Pc_TC086122 | 0.08  | 0.91  |      | 0.1   | 0.91      |      | -3.23 | 0.01      | Down | -1.95 | 0.02  | Down | Uncharacterized protein (Fragment)                       |
| Pc_TC086135 | -0.38 | 0.65  |      | -2.36 | 0.03      | Down | 2.18  | 0.05      | Up   | 0.87  | 0.28  |      | Expressed protein                                        |
| Pc_TC086144 | -3.04 | 0.02  | Down | -1.83 | 0.14      |      | 1.71  | 0.15      |      | -0.12 | 0.94  |      | Expressed protein                                        |
| Pc_TC086164 | -0.01 | 1     |      | 0.45  | 0.73      |      | -3.5  | 0.08      |      | -3.37 | 0.04  | Down | Expressed protein                                        |
| Pc_TC086170 | 0.47  | 0.49  |      | 0.21  | 0.81      |      | -2.8  | 0.03      | Down | -0.62 | 0.47  |      | Expressed protein                                        |
| Pc_TC086179 | 0.66  | 0.28  |      | 0.8   | 0.26      |      | 0     | 1.50E-005 |      | -2.27 | 0.01  | Down | Expressed protein                                        |
| Pc_TC086190 | 0.13  | 0.92  |      | -0.05 | 1         |      | -3.3  | 0.04      | Down | -1.72 | 0.13  |      | Expressed protein                                        |
| Pc_TC086191 | 0.13  | 0.88  |      | 0.27  | 0.76      |      | -6.33 | 0         | Down | -3.04 | 0     | Down | Expressed protein                                        |
| Pc_TC086200 | -0.43 | 0.55  |      | 1.28  | 0.07      |      | -1.9  | 0.12      |      | -3    | 0     | Down | Plant protein 1589 of unknown function                   |
| Pc_TC086219 | 1.51  | 0.04  | Up   | 1.36  | 0.11      |      | 1.2   | 0.32      |      | 0.47  | 0.62  |      | Expressed protein                                        |
| Pc_TC086223 | 0.88  | 0.03  |      | 0.96  | 0.06      |      | -2.61 | 0.01      | Down | -0.14 | 0.82  |      | Expressed protein                                        |
| Pc_TC086237 | -1.86 | 0     | Down | -1.43 | 0.06      |      | 1.83  | 0.07      |      | -0.03 | 0.98  |      | Expressed protein                                        |
| Pc_TC086243 | 0.48  | 0.53  |      | 1.66  | 0.03      | Up   | -2.82 | 0.05      | Down | -1.37 | 0.17  |      | Expressed protein                                        |
| Pc_TC086256 | 0.47  | 0.56  |      | 1.09  | 0.19      |      | -2.78 | 0.05      |      | -2.2  | 0.04  | Down | Expressed protein                                        |
| Pc_TC086264 | 2.24  | 0     | Up   | 0     | 4.69E-005 |      | 1.88  | 0.09      |      | 0.89  | 0.27  |      | delta subunit of Mt ATP synthase                         |
| Pc_TC086283 | -0.09 | 0.95  |      | -0.72 | 0.49      |      | -0.86 | 0.52      |      | -3.96 | 0     | Down | Expressed protein                                        |
| Pc_TC086290 | -0.42 | 0.36  |      | -0.21 | 0.71      |      | -0.96 | 0.32      |      | -1.38 | 0.03  | Down | Expressed protein                                        |
| Pc_TC086307 | 0.2   | 0.68  |      | 0.18  | 0.77      |      | -2.25 | 0.04      | Down | -0.44 | 0.51  |      | lectin protein kinase family protein                     |
| Pc_TC086311 | 0.03  | 0.98  |      | 0.87  | 0.2       |      | -2.57 | 0.03      | Down | -1.75 | 0.03  | Down | Expressed protein                                        |
| Pc_TC086322 | -1.47 | 0.11  |      | -2.49 | 0.03      | Down | 0.3   | 0.82      |      | 0.17  | 0.86  |      | Putative uncharacterized protein                         |
| Pc_TC086325 | -1.98 | 0     | Down | -1.26 | 0.1       |      | 0.89  | 0.39      |      | -2.02 | 0.01  | Down | Expressed protein                                        |
| Pc_TC086330 | -1.29 | 0.19  |      | 1.31  | 0.13      |      | -3.45 | 0.03      | Down | -1.24 | 0.24  |      | Expressed protein                                        |
| Pc_TC086343 | 0.38  | 0.31  |      | 0.97  | 0.03      |      | -1.63 | 0.08      |      | -1.45 | 0.01  | Down | Expressed protein                                        |
| Pc_TC086355 | 0.5   | 0.51  |      | 0.73  | 0.39      |      | -1.37 | 0.29      |      | -4.25 | 0     | Down | Expressed protein                                        |
| Pc_TC086356 | 0     | ##### |      | -5.35 | 1.09E-005 | Down | -5.91 | 0         | Down | 0     | ##### |      | Expressed protein                                        |
| Pc_TC086363 | 0     | 1     |      | -0.03 | 0.97      |      | -4.24 | 0         | Down | -3.31 | ##### | Down | Expressed protein                                        |
| Pc_TC086372 | 1.76  | 0     | Up   | 0     | 6.86E-006 |      | 1.4   | 0.2       |      | -0.77 | 0.37  |      | Translation elongation factor EF1B,gamma chain           |
| Pc_TC086373 | -3.38 | 0     | Down | -2.82 | 0.01      | Down | 1.33  | 0.24      |      | -0.83 | 0.37  |      | Expressed protein                                        |
| Pc_TC086379 | 0.08  | 1     |      | -1.94 | 0.4       |      | 3.07  | 0.02      | Up   | 1.33  | 0.29  |      | Putative protein                                         |
| Pc_TC086384 | 0.27  | 0.71  |      | 1.85  | 0.01      | Up   | -1.5  | 0.22      |      | -0.06 | 0.96  |      | Expressed protein                                        |
| Pc_TC086385 | 0.88  | 0.09  |      | 0.56  | 0.39      |      | -1.34 | 0.22      |      | 1.5   | 0.02  | Up   | Expressed protein                                        |
| Pc_TC086434 | -0.69 | 0.19  |      | -1.29 | 0.05      | Down | 1.19  | 0.22      |      | 0.15  | 0.82  |      | Expressed protein                                        |
| Pc_TC086445 | -0.69 | 0.28  |      | -0.67 | 0.37      |      | 1.88  | 0.07      |      | 1.36  | 0.05  | Up   | Expressed protein                                        |
| Pc_TC086447 | -0.37 | 0.6   |      | -1.92 | 0.03      | Down | 1.19  | 0.27      |      | 0.52  | 0.49  |      | Expressed protein                                        |
| Pc_TC086454 | 0.14  | 0.88  |      | 1.3   | 0.09      |      | -4.56 | 0         | Down | -2.85 | 0.01  | Down | Leucine-rich receptor-like protein kinase family protein |
| Pc_TC086483 | 0.7   | 0.27  |      | 1.8   | 0.01      | Up   | -1.46 | 0.22      |      | -0.02 | 0.99  |      | cysteine-rich RLK (RECEPTOR-like protein kinase) 8       |
| Pc_TC086487 | -0.69 | 0.42  |      | -1.05 | 0.3       |      | 1.02  | 0.38      |      | -3.41 | 0     | Down | Expressed protein                                        |
| Pc_TC086488 | -2.53 | 0     | Down | -0.79 | 0.37      |      | -0.52 | 0.66      |      | 0.89  | 0.25  |      | Uncharacterized protein (Fragment)                       |
| Pc_TC086493 | 0.42  | 0.4   |      | 0.18  | 0.78      |      | -2.19 | 0.04      | Down | -0.37 | 0.58  |      | thylakoid processing peptide                             |
| Pc_TC086501 | 0.24  | 0.75  |      | 0.66  | 0.4       |      | -2.7  | 0.04      | Down | -1    | 0.25  |      | Putative uncharacterized protein Sb03g027495 (Fragment)  |
| Pc_TC086502 | -0.06 | 0.96  |      | 0.35  | 0.66      |      | -2.63 | 0.04      | Down | -2.17 | 0.02  | Down | Expressed protein                                        |
| Pc_TC086509 | 2.9   | ##### | Up   | 0     | 0         |      | 1.16  | 0.33      |      | -0.25 | 0.82  |      | beta-hexosaminidase 3                                    |
| Pc_TC086520 | -2.68 | 0.03  | Down | -1.24 | 0.29      |      | 0.42  | 0.76      |      | 0.08  | 0.97  |      | Expressed protein                                        |
| Pc_TC086531 | -0.02 | 0.98  |      | 0.74  | 0.23      |      | -2.7  | 0.02      | Down | -1.31 | 0.07  |      | Expressed protein                                        |
| Pc_TC086542 | -2.11 | 0.05  | Down | -0.42 | 0.7       |      | 1.3   | 0.27      |      | 0.08  | 0.96  |      | Os10g0317000 protein                                     |
| Pc_TC086545 | -2.51 | 0.01  | Down | -0.87 | 0.38      |      | -2.89 | 0.04      | Down | -0.91 | 0.34  |      | Expressed protein                                        |
| Pc_TC086552 | 0.34  | 0.46  |      | 0.56  | 0.32      |      | -3.43 | 0         | Down | -2.06 | 0     | Down | Expressed protein                                        |
| Pc_TC086561 | 0.22  | 0.7   |      | 0.51  | 0.44      |      | -2.35 | 0.04      | Down | -1.35 | 0.07  |      | Expressed protein                                        |
| Pc_TC086562 | 0.47  | 0.68  |      | 1.92  | 0.04      | Up   | 1.5   | 0.25      |      | -0.29 | 0.86  |      | Expressed protein                                        |
| Pc_TC086573 | 0.45  | 0.42  |      | 1.24  | 0.05      | Up   | -1.92 | 0.09      |      | -2.02 | 0.01  | Down | Expressed protein                                        |
| Pc_TC086587 | -0.73 | 0.53  |      | 0.52  | 0.64      |      | -1.89 | 0.23      |      | -2.77 | 0.04  | Down | Expressed protein                                        |
| Pc_TC086636 | -1.62 | 0.01  | Down | -0.55 | 0.42      |      | 0.44  | 0.66      |      | -0.09 | 0.9   |      | Expressed protein                                        |
| Pc_TC086643 | 0.23  | 0.68  |      | 0.92  | 0.14      |      | -2.79 | 0.01      | Down | -2.27 | 0     | Down | Expressed protein                                        |
| Pc_TC086648 | 1.03  | 0.02  | Up   | 0     | 1.88E-014 |      | 1.05  | 0.27      |      | -0.12 | 0.86  |      | COP1-interactive protein 1                               |
| Pc_TC086659 | -0.24 | 0.77  |      | -0.3  | 0.75      |      | -2.03 | 0.11      |      | -2.16 | 0.03  | Down | Expressed protein                                        |
| Pc_TC086668 | 0.08  | 0.95  |      | 0.25  | 0.8       |      | -4.34 | 0.01      | Down | -2.48 | 0.02  | Down | Expressed protein                                        |
| Pc_TC086670 | 0.36  | 0.5   |      | 1.24  | 0.04      | Up   | -1.25 | 0.24      |      | -0.34 | 0.62  |      | Expressed protein                                        |
| Pc_TC086679 | -2.12 | 0.02  | Down | -3.88 | 0         | Down | -0.02 | 1         |      | -1.44 | 0.13  |      | translation elongation factor Ts (EF-Ts),putative        |
| Pc_TC086682 | -0.6  | 0.66  |      | -1.13 | 0.44      |      | 2.59  | 0.04      | Up   | 2.66  | 0     | Up   | translation elongation factor Ts (EF-Ts),putative        |
| Pc_TC086683 | -2.07 | 0.01  | Down | -0.9  | 0.31      |      | 1.68  | 0.12      |      | 0.94  | 0.22  |      | translation elongation factor Ts (EF-Ts),putative        |
| Pc_TC086688 | 0.13  | 0.88  |      | 0.88  | 0.27      |      | 0     | 0         |      | -3.08 | 0     | Down | Uncharacterized protein                                  |
| Pc_TC086708 | -2.73 | 0.05  | Down | -3.33 | 0.04      | Down | -4.89 | 0.02      | Down | -3.77 | 0.01  | Down | Uncharacterized protein                                  |

|             |       |       |      |       |           |      |       |           |      |       |       |      |                                                |
|-------------|-------|-------|------|-------|-----------|------|-------|-----------|------|-------|-------|------|------------------------------------------------|
| Pc_TC086717 | 2.22  | 0     | Up   | 0     | 0         |      | 2.49  | 0.03      | Up   | 0.01  | 1     |      | Expressed protein                              |
| Pc_TC086721 | 2.55  | 0.01  | Up   | 0     | 0.09      |      | 2.11  | 0.13      |      | -0.37 | 0.87  |      | Expressed protein                              |
| Pc_TC086731 | 0.39  | 0.62  |      | 0.95  | 0.25      |      | -4.85 | 0         | Down | -1.73 | 0.09  |      | Expressed protein                              |
| Pc_TC086736 | -0.09 | 0.87  |      | -0.59 | 0.38      |      | 0.68  | 0.49      |      | 1.25  | 0.05  | Up   | Expressed protein                              |
| Pc_TC086750 | 2.05  | 0.03  | Up   | 1.85  | 0.09      |      | 1.21  | 0.41      |      | 2.41  | 0.01  | Up   | Expressed protein                              |
| Pc_TC086754 | 0.32  | 0.7   |      | 0.33  | 0.73      |      | -0.88 | 0.5       |      | -2.08 | 0.05  | Down | Expressed protein                              |
| Pc_TC086761 | 0.21  | 0.69  |      | 0.34  | 0.58      |      | -2.75 | 0.01      | Down | -1.81 | 0.01  | Down | Expressed protein                              |
| Pc_TC086762 | -1.14 | 0.09  |      | 0.15  | 0.85      |      | -1.15 | 0.3       |      | -2.86 | 0     | Down | Lipases hydrolases                             |
| Pc_TC086771 | 0.13  | 0.71  |      | 0.4   | 0.38      |      | -1.05 | 0.24      |      | -1.25 | 0.02  | Down | Expressed protein                              |
| Pc_TC086805 | 0.34  | 0.5   |      | 0.49  | 0.42      |      | -2.36 | 0.03      | Down | -0.98 | 0.15  |      | Expressed protein                              |
| Pc_TC086809 | -1.92 | 0.01  | Down | -0.76 | 0.35      |      | 0.04  | 0.98      |      | 0.55  | 0.46  |      | Uncharacterized protein                        |
| Pc_TC086811 | -0.09 | 0.88  |      | -0.04 | 0.96      |      | -0.86 | 0.41      |      | -1.48 | 0.04  | Down | Expressed protein                              |
| Pc_TC086827 | 0.08  | 0.96  |      | 0.23  | 0.82      |      | -2.2  | 0.11      |      | -3.66 | 0     | Down | Uncharacterized protein                        |
| Pc_TC086836 | 0.72  | 0.6   |      | 1.64  | 0.17      |      | 2.93  | 0.03      | Up   | 0.16  | 0.99  |      | Expressed protein                              |
| Pc_TC086838 | 0.54  | 0.31  |      | 1.11  | 0.07      |      | -4    | 0         | Down | -3.02 | 0     | Down | Expressed protein                              |
| Pc_TC086841 | 0.84  | 0.09  |      | 1.87  | 0         | Up   | -7.37 | 1.17E-006 | Down | -2.73 | 0     | Down | Expressed protein                              |
| Pc_TC086850 | 1.49  | 0.02  | Up   | 1.08  | 0.15      |      | -1.01 | 0.4       |      | -0.09 | 0.93  |      | Expressed protein                              |
| Pc_TC086851 | 0.24  | 0.73  |      | 0.83  | 0.26      |      | -3.74 | 0.01      | Down | -3.62 | 0     | Down | Expressed protein                              |
| Pc_TC086856 | -0.45 | 0.51  |      | -0.23 | 0.78      |      | -2.98 | 0.02      | Down | -2.77 | 0     | Down | Expressed protein                              |
| Pc_TC086857 | -0.02 | 0.98  |      | -0.1  | 0.9       |      | -2.45 | 0.04      | Down | -1.23 | 0.11  |      | Expressed protein                              |
| Pc_TC086862 | 0.36  | 0.5   |      | 0.78  | 0.2       |      | -3.01 | 0.01      | Down | -1.6  | 0.03  | Down | Expressed protein                              |
| Pc_TC086871 | 0.86  | 0.28  |      | -0.21 | 0.87      |      | 0     | 0         |      | -2.43 | 0.04  | Down | Expressed protein                              |
| Pc_TC086874 | 0     | ##### |      | 0     | 2.00E-005 |      | -6.25 | 0         | Down | 0     | ##### |      | Histone superfamily protein                    |
| Pc_TC086876 | -0.43 | 0.5   |      | 0.08  | 0.92      |      | -1.67 | 0.14      |      | -1.78 | 0.02  | Down | Expressed protein                              |
| Pc_TC086882 | -2.51 | 0.05  | Down | -0.07 | 1         |      | 0.7   | 0.59      |      | 0.33  | 0.77  |      | Expressed protein                              |
| Pc_TC086892 | -1.34 | 0.05  |      | -1.68 | 0.04      | Down | -1.22 | 0.28      |      | -0.66 | 0.39  |      | Expressed protein                              |
| Pc_TC086899 | 1.54  | 0.01  | Up   | 0.33  | 0.67      |      | -2    | 0.09      |      | 0.46  | 0.54  |      | Expressed protein                              |
| Pc_TC086922 | -0.28 | 0.72  |      | -0.74 | 0.41      |      | -0.6  | 0.62      |      | -2.01 | 0.03  | Down | unknown protein                                |
| Pc_TC086938 | 0.18  | 0.75  |      | 0.46  | 0.46      |      | -1.63 | 0.13      |      | -1.58 | 0.03  | Down | Expressed protein                              |
| Pc_TC086940 | 0.77  | 0.2   |      | 1.06  | 0.13      |      | -2.97 | 0.02      | Down | -0.58 | 0.46  |      | Expressed protein                              |
| Pc_TC086958 | 0.62  | 0.21  |      | 0.82  | 0.16      |      | -2.18 | 0.04      | Down | -1.24 | 0.07  |      | Uncharacterized protein                        |
| Pc_TC086961 | -2.12 | 0.02  | Down | -1.38 | 0.16      |      | -0.73 | 0.56      |      | -0.51 | 0.58  |      | Expressed protein                              |
| Pc_TC086963 | -0.81 | 0.2   |      | -1.24 | 0.1       |      | -0.62 | 0.57      |      | -2    | 0.01  | Down | farnesylcysteine lyase                         |
| Pc_TC086968 | 1.24  | 0.07  |      | -0.04 | 0.99      |      | 0.19  | 0.89      |      | 2.03  | 0.01  | Up   | receptor lectin kinase                         |
| Pc_TC086973 | -0.12 | 0.84  |      | 1.4   | 0.02      | Up   | -5.24 | 6.05E-005 | Down | -1.93 | 0.01  | Down | Expressed protein                              |
| Pc_TC086975 | -0.82 | 0.19  |      | -1.58 | 0.04      | Down | -0.12 | 0.91      |      | -0.42 | 0.57  |      | Expressed protein                              |
| Pc_TC086978 | -0.8  | 0.29  |      | -0.01 | 1         |      | -3.08 | 0.02      | Down | -1.29 | 0.14  |      | Expressed protein                              |
| Pc_TC086979 | 0.5   | 0.15  |      | 0.39  | 0.38      |      | -2.96 | 0         | Down | -1.6  | 0     | Down | Expressed protein                              |
| Pc_TC086980 | -0.63 | 0.21  |      | 0.53  | 0.35      |      | -3.8  | 0         | Down | -2.44 | 0     | Down | Expressed protein                              |
| Pc_TC086993 | 0.26  | 0.65  |      | 0.84  | 0.19      |      | -2.64 | 0.02      | Down | -0.97 | 0.18  |      | Expressed protein                              |
| Pc_TC087002 | 0.28  | 0.53  |      | 0.57  | 0.29      |      | -2.12 | 0.04      | Down | -1.21 | 0.06  |      | Expressed protein                              |
| Pc_TC087010 | 0.62  | 0.29  |      | 0.39  | 0.59      |      | -2.79 | 0.02      | Down | -0.72 | 0.35  |      | Expressed protein                              |
| Pc_TC087012 | 0.86  | 0.25  |      | 0.35  | 0.72      |      | 0.78  | 0.52      |      | 1.91  | 0.02  | Up   | metallothionein 3                              |
| Pc_TC087013 | 0.96  | 0.14  |      | 0.45  | 0.59      |      | 1.3   | 0.24      |      | 1.73  | 0.02  | Up   | Expressed protein                              |
| Pc_TC087014 | 0.75  | 0.01  |      | 0.17  | 0.65      |      | 1.53  | 0.07      |      | 1.92  | 0     | Up   | metallothionein 3                              |
| Pc_TC087035 | 0.04  | 0.96  |      | 0.87  | 0.18      |      | -2.54 | 0.03      | Down | -2.33 | 0     | Down | Expressed protein                              |
| Pc_TC087041 | 0.81  | 0.32  |      | 1.2   | 0.17      |      | -4.35 | 0.01      | Down | -2.43 | 0.04  | Down | Expressed protein                              |
| Pc_TC087050 | -1.87 | 0.01  | Down | -5.35 | 1.09E-005 | Down | -1.51 | 0.2       |      | -3.2  | 0     | Down | Expressed protein                              |
| Pc_TC087056 | 1.52  | 0     | Up   | 0     | 1.32E-008 |      | 1.8   | 0.08      |      | 0.91  | 0.19  |      | Expressed protein                              |
| Pc_TC087057 | 2.34  | 0     | Up   | 0     | 0         |      | 1.46  | 0.2       |      | 0.71  | 0.4   |      | Rubredoxin-like superfamily protein            |
| Pc_TC087066 | 2.5   | 0     | Up   | 0     | 0.02      |      | 2.81  | 0.02      | Up   | 1.1   | 0.3   |      | Expressed protein                              |
| Pc_TC087067 | 3.83  | ##### | Up   | 0     | 0.15      |      | 3.04  | 0.03      | Up   | 0.4   | 0.86  |      | S-adenosylmethionine synthetase family protein |
| Pc_TC087068 | 1.65  | 0.01  | Up   | 0     | 3.64E-006 |      | 1.4   | 0.2       |      | 0.23  | 0.78  |      | S-adenosylmethionine synthetase family protein |
| Pc_TC087078 | 0.5   | 0.11  |      | 0.14  | 0.73      |      | 1     | 0.23      |      | 1.24  | 0.01  | Up   | Expressed protein                              |
| Pc_TC087085 | -1.03 | 0.2   |      | -0.27 | 0.77      |      | -3.44 | 0.02      | Down | -2.13 | 0.03  | Down | Expressed protein                              |
| Pc_TC087115 | 0.49  | 0.64  |      | 1.93  | 0.04      | Up   | -2.34 | 0.17      |      | 0.26  | 0.85  |      | Expressed protein                              |
| Pc_TC087124 | 0.26  | 0.62  |      | 0.46  | 0.47      |      | -7.11 | 3.16E-006 | Down | -2.9  | 0     | Down | Uncharacterized protein                        |
| Pc_TC087125 | -4.24 | 0.01  | Down | -0.09 | 0.99      |      | -2.23 | 0.17      |      | -2.7  | 0.05  |      | Expressed protein                              |
| Pc_TC087144 | 2.66  | 0.01  | Up   | 0.47  | 0.86      |      | 2.2   | 0.15      |      | 1.04  | 0.5   |      | Expressed protein                              |
| Pc_TC087156 | -0.16 | 0.86  |      | 0.37  | 0.66      |      | -1.42 | 0.26      |      | -2.4  | 0.02  | Down | Expressed protein                              |
| Pc_TC087170 | 0.45  | 0.57  |      | 1.76  | 0.03      | Up   | -2.71 | 0.06      |      | 0.27  | 0.78  |      | Expressed protein                              |
| Pc_TC087178 | 0.31  | 0.75  |      | -0.34 | 0.77      |      | 0     | 0         |      | -5.23 | 0     | Down | Expressed protein                              |

|             |       |       |      |  |       |           |      |       |           |      |  |       |       |      |                                                                         |            |
|-------------|-------|-------|------|--|-------|-----------|------|-------|-----------|------|--|-------|-------|------|-------------------------------------------------------------------------|------------|
| Pc_TC087179 | -0.9  | 0.09  |      |  | -1.59 | 0.02      | Down | 1.18  | 0.22      |      |  | -0.34 | 0.61  |      | Expressed protein                                                       |            |
| Pc_TC087191 | 1.52  | 0.05  | Up   |  | 0.7   | 0.48      |      | -1.33 | 0.36      |      |  | 1.09  | 0.23  |      | Expressed protein                                                       |            |
| Pc_TC087201 | -0.66 | 0.1   |      |  | -1.65 | 0         | Down | 0.79  | 0.36      |      |  | 0.01  | 0.99  |      | Expressed protein                                                       |            |
| Pc_TC087218 | 0.01  | 1     |      |  | -0.43 | 0.67      |      | -0.68 | 0.6       |      |  | -2.31 | 0.03  | Down | Expressed protein                                                       |            |
| Pc_TC087222 | 0.41  | 0.46  |      |  | 1.52  | 0.01      | Up   | -3.02 | 0.01      | Down |  | -1.26 | 0.09  |      | Ubiquitin carboxyl-terminal hydrolase                                   |            |
| Pc_TC087231 | -0.52 | 0.17  |      |  | -1.14 | 0.02      | Down | 0.11  | 0.9       |      |  | -0.13 | 0.81  |      | Expressed protein                                                       |            |
| Pc_TC087246 | -0.73 | 0.47  |      |  | -0.75 | 0.51      |      | -3.72 | 0.03      | Down |  | -0.28 | 0.81  |      | Expressed protein                                                       |            |
| Pc_TC087251 | 0.08  | 0.9   |      |  | 0.24  | 0.73      |      | -2.63 | 0.02      | Down |  | -2.43 | 0     | Down | microtubule-associated proteins 70-2                                    |            |
| Pc_TC087257 | -0.31 | 0.67  |      |  | -0.31 | 0.71      |      | -3.57 | 0.01      | Down |  | -1.58 | 0.07  |      | Expressed protein                                                       |            |
| Pc_TC087268 | 0     | ##### |      |  | 0     | 4.78E-018 |      | -9.52 | 2.84E-009 | Down |  | 0     | ##### |      | Expressed protein                                                       |            |
| Pc_TC087271 | 0.33  | 0.54  |      |  | 1.15  | 0.06      |      | -3    | 0.01      | Down |  | -0.41 | 0.56  |      | Expressed protein                                                       |            |
| Pc_TC087275 | -0.18 | 0.69  |      |  | -1.19 | 0.05      | Down | -1.01 | 0.3       |      |  | -0.74 | 0.23  |      | Expressed protein                                                       |            |
| Pc_TC087280 | 1.17  | 0.02  | Up   |  | 0.75  | 0.23      |      | 0.37  | 0.72      |      |  | 0.68  | 0.3   |      | Di-glucose binding protein with Kinesin motor domain                    |            |
| Pc_TC087287 | 0.24  | 0.64  |      |  | -0.45 | 0.48      |      | 2.25  | 0.02      | Up   |  | 1.6   | 0.01  | Up   | Expressed protein                                                       |            |
| Pc_TC087295 | -1.94 | 0.01  | Down |  | -0.59 | 0.47      |      | 0.2   | 0.86      |      |  | -0.17 | 0.85  |      | Expressed protein                                                       |            |
| Pc_TC087299 | -0.08 | 0.96  |      |  | 0.33  | 0.73      |      | 0     | 0         |      |  | -2.08 | 0.05  | Down | Expressed protein                                                       |            |
| Pc_TC087319 | 0.15  | 0.83  |      |  | 0.15  | 0.84      |      | -2.21 | 0.06      |      |  | -2    | 0.02  | Down | Expressed protein                                                       |            |
| Pc_TC087323 | 0.56  | 0.1   |      |  | 0.8   | 0.06      |      | -3.81 | 0         | Down |  | -1.29 | 0.02  | Down | Expressed protein                                                       |            |
| Pc_TC087350 | -0.21 | 0.75  |      |  | 0.02  | 0.99      |      | -1.3  | 0.24      |      |  | -1.55 | 0.05  | Down | Expressed protein                                                       |            |
| Pc_TC087352 | -0.32 | 0.68  |      |  | -0.5  | 0.56      |      | -2.87 | 0.03      | Down |  | -2.16 | 0.02  | Down | Expressed protein                                                       |            |
| Pc_TC087353 | 0.13  | 0.86  |      |  | 0.46  | 0.53      |      | -4.97 | 0         | Down |  | -2.15 | 0.01  | Down | Expressed protein                                                       |            |
| Pc_TC087356 | -1.11 | 0.15  |      |  | -2.29 | 0.02      | Down | -2.63 | 0.04      | Down |  | -0.42 | 0.62  |      | hAT transposon superfamily                                              |            |
| Pc_TC087358 | -1.61 | 0     | Down |  | -0.48 | 0.44      |      | 1.07  | 0.26      |      |  | 0.79  | 0.2   |      | hAT transposon superfamily                                              |            |
| Pc_TC087362 | 0.64  | 0.17  |      |  | 0.26  | 0.66      |      | -3.87 | 0         | Down |  | -1.37 | 0.04  | Down | Expressed protein                                                       |            |
| Pc_TC087371 | 2.78  | ##### | Up   |  | 0     | 2.52E-006 |      | 2.01  | 0.06      |      |  | 0.93  | 0.21  |      | ATP synthase alpha/beta family protein                                  |            |
| Pc_TC087378 | -0.75 | 0.57  |      |  | 2.17  | 0.02      | Up   | -2.17 | 0.21      |      |  | 1.71  | 0.07  |      | Expressed protein                                                       |            |
| Pc_TC087389 | 1.12  | 0.01  | Up   |  | 0     | 1.15E-018 |      | 1.39  | 0.12      |      |  | 0.46  | 0.43  |      | endoplasmic reticulum-type calcium-transporting ATPase 3                |            |
| Pc_TC087392 | -1.22 | 0.19  |      |  | -0.06 | 0.98      |      | 2.82  | 0.01      | Up   |  | 0.99  | 0.24  |      | Uncharacterized protein                                                 |            |
| Pc_TC087396 | -0.62 | 0.43  |      |  | -0.68 | 0.45      |      | -3.28 | 0.02      | Down |  | -2.25 | 0.02  | Down | Expressed protein                                                       |            |
| Pc_TC087397 | 0.24  | 0.82  |      |  | 2.1   | 0.01      | Up   | -1.82 | 0.22      |      |  | -0.85 | 0.45  |      | Expressed protein                                                       |            |
| Pc_TC087398 | 0     | 0     |      |  | 0     | 0         |      | 0     | 0         |      |  | -5.33 | 0     | Down | Expressed protein                                                       |            |
| Pc_TC087414 | -0.49 | 0.36  |      |  | -1.65 | 0.02      | Down | 1.09  | 0.27      |      |  | 0.45  | 0.49  |      | Putative uncharacterized protein                                        |            |
| Pc_TC087415 | -2.96 | 0     | Down |  | -1.54 | 0.07      |      | -6.85 | 9.64E-005 | Down |  | -4.15 | ##### | Down | Expressed protein                                                       |            |
| Pc_TC087416 | 0.26  | 0.71  |      |  | 0.67  | 0.37      |      | 1.87  | 0.08      |      |  | 3.47  | ##### | Up   | zinc ion binding;DNA binding;helicases;ATP binding;nucleic acid binding | Alfin-like |
| Pc_TC087417 | -1.18 | 0.01  | Down |  | -1.05 | 0.07      |      | -0.29 | 0.75      |      |  | -0.7  | 0.25  |      | zinc ion binding;DNA binding;helicases;ATP binding;nucleic acid binding | Alfin-like |
| Pc_TC087429 | -1.69 | 0.05  |      |  | -2.61 | 0.01      | Down | -0.08 | 0.96      |      |  | -0.4  | 0.66  |      | putative Ty1-copia subclass                                             |            |
| Pc_TC087441 | 1.13  | 0.11  |      |  | 1.86  | 0.02      | Up   | 1.31  | 0.25      |      |  | 1.22  | 0.13  |      | Expressed protein                                                       |            |
| Pc_TC087446 | -1.51 | 0.24  |      |  | -0.53 | 0.71      |      | 0.83  | 0.55      |      |  | -3.54 | 0.03  | Down | Expressed protein                                                       |            |
| Pc_TC087459 | -0.16 | 0.84  |      |  | 0.86  | 0.24      |      | -2.5  | 0.05      | Down |  | -0.89 | 0.28  |      | Expressed protein                                                       |            |
| Pc_TC087460 | -2.29 | 0.04  | Down |  | -2.09 | 0.08      |      | -3.45 | 0.03      | Down |  | -1.63 | 0.13  |      | Expressed protein                                                       |            |
| Pc_TC087465 | 1.08  | 0.22  |      |  | 1.17  | 0.24      |      | -3.74 | 0.05      | Down |  | -1.82 | 0.16  |      | Uncharacterized protein                                                 |            |
| Pc_TC087472 | 0.43  | 0.51  |      |  | 1.31  | 0.06      |      | -3.3  | 0.01      | Down |  | -1.52 | 0.07  |      | Expressed protein                                                       |            |
| Pc_TC087495 | -0.45 | 0.57  |      |  | -2.06 | 0.04      | Down | 0.65  | 0.57      |      |  | 0.01  | 1     |      | Expressed protein                                                       |            |
| Pc_TC087499 | 1.74  | 0.03  | Up   |  | 0     | 0.01      |      | 0.58  | 0.69      |      |  | -1.22 | 0.34  |      | 5-formyltetrahydrofolate cycloligase                                    |            |
| Pc_TC087500 | 0.51  | 0.31  |      |  | 0.9   | 0.13      |      | -2.55 | 0.02      | Down |  | -1.48 | 0.04  | Down | Expressed protein                                                       |            |
| Pc_TC087505 | 2.15  | 0     | Up   |  | 0     | 0         |      | 1.75  | 0.15      |      |  | 1.01  | 0.28  |      | ornithine-delta-aminotransferase                                        |            |
| Pc_TC087507 | -0.56 | 0.52  |      |  | -2.23 | 0.05      | Down | 0.03  | 1         |      |  | -0.91 | 0.35  |      | Plastid-lipid associated protein PAP / fibrillin family protein         |            |
| Pc_TC087513 | 0.35  | 0.39  |      |  | 0.32  | 0.54      |      | -2.15 | 0.03      | Down |  | -1.52 | 0.01  | Down | Expressed protein                                                       |            |
| Pc_TC087520 | 0.56  | 0.19  |      |  | 1.02  | 0.05      | Up   | 0     | 7.58E-010 |      |  | -3.56 | ##### | Down | Expressed protein                                                       |            |
| Pc_TC087531 | 0.67  | 0.22  |      |  | 1.24  | 0.05      | Up   | -1.84 | 0.1       |      |  | -0.61 | 0.4   |      | Expressed protein                                                       |            |
| Pc_TC087553 | 0.47  | 0.32  |      |  | 0.15  | 0.81      |      | -1.77 | 0.09      |      |  | -1.32 | 0.05  | Down | Expressed protein                                                       |            |
| Pc_TC087563 | 0.47  | 0.68  |      |  | -0.13 | 0.97      |      | 1.34  | 0.31      |      |  | 2.02  | 0.03  | Up   | Expressed protein                                                       |            |
| Pc_TC087583 | 2.04  | 0.04  | Up   |  | 2.41  | 0.02      | Up   | 1.19  | 0.45      |      |  | 1.63  | 0.16  |      | Expressed protein                                                       |            |
| Pc_TC087587 | -0.64 | 0.39  |      |  | 1.06  | 0.15      |      | -2.54 | 0.05      | Down |  | -1.1  | 0.2   |      | Expressed protein                                                       |            |
| Pc_TC087624 | -1.7  | 0.03  | Down |  | -0.68 | 0.43      |      | -2.27 | 0.07      |      |  | -1.94 | 0.03  | Down | Expressed protein                                                       |            |
| Pc_TC087634 | 2.25  | 0.09  |      |  | 1.52  | 0.39      |      | 2.46  | 0.14      |      |  | 3.12  | 0.01  | Up   | Expressed protein                                                       |            |
| Pc_TC087646 | 0.18  | 0.76  |      |  | 0.35  | 0.6       |      | -1.22 | 0.26      |      |  | -1.96 | 0.01  | Down | Expressed protein                                                       |            |
| Pc_TC087660 | -1.6  | 0.24  |      |  | 0.23  | 0.9       |      | -3.5  | 0.08      |      |  | -3.37 | 0.04  | Down | Uncharacterized protein                                                 |            |
| Pc_TC087667 | 2.4   | 0.4   |      |  | 3.23  | 0.18      |      | 5.46  | 0         | Up   |  | 4.21  | 0.02  | Up   | Expressed protein                                                       |            |
| Pc_TC087676 | 0.71  | 0.16  |      |  | 2.3   | 4.15E-005 | Up   | -3.57 | 0         | Down |  | -1.11 | 0.12  |      | senescence associated gene 24                                           |            |
| Pc_TC087684 | 1.12  | 0.13  |      |  | 1.1   | 0.2       |      | -0.87 | 0.51      |      |  | 1.68  | 0.04  | Up   | Expressed protein                                                       |            |
| Pc_TC087695 | -0.83 | 0.13  |      |  | -1.63 | 0.02      | Down | 1.45  | 0.13      |      |  | 0.81  | 0.2   |      | Expressed protein                                                       |            |

|             |       |       |      |       |           |      |       |           |      |       |       |      |                                                       |                 |
|-------------|-------|-------|------|-------|-----------|------|-------|-----------|------|-------|-------|------|-------------------------------------------------------|-----------------|
| Pc_TC087697 | 0.49  | 0.52  |      | 0.66  | 0.43      |      | -3.7  | 0.01      | Down | -0.61 | 0.51  |      | Expressed protein                                     |                 |
| Pc_TC087700 | -1.05 | 0.04  | Down | -0.28 | 0.64      |      | 0.25  | 0.8       |      | 0.04  | 0.96  |      | Expressed protein                                     |                 |
| Pc_TC087706 | 0.8   | 0.17  |      | 0.63  | 0.36      |      | -2.7  | 0.03      | Down | 0.36  | 0.63  |      | Expressed protein                                     |                 |
| Pc_TC087715 | 0.09  | 0.86  |      | 0.56  | 0.34      |      | -7.74 | 2.81E-007 | Down | -3.81 | ##### | Down | Protein phosphatase 2C family protein                 |                 |
| Pc_TC087723 | 0.26  | 0.6   |      | 0.24  | 0.7       |      | -2.35 | 0.03      | Down | -1.78 | 0.01  | Down | Uncharacterized protein (Fragment)                    |                 |
| Pc_TC087731 | 0.13  | 0.88  |      | 1.98  | 0.01      | Up   | -3.96 | 0.01      | Down | -2.46 | 0.01  | Down | Expressed protein                                     |                 |
| Pc_TC087732 | 0.99  | 0.02  |      | 1.17  | 0.03      | Up   | -2.38 | 0.02      | Down | 1.09  | 0.06  |      | Expressed protein                                     |                 |
| Pc_TC087763 | -0.15 | 0.86  |      | 0.5   | 0.53      |      | -2.28 | 0.07      |      | -2.33 | 0.01  | Down | Expressed protein                                     |                 |
| Pc_TC087770 | -4.24 | 0.01  | Down | -4.26 | 0.02      | Down | -1.36 | 0.38      |      | -2.37 | 0.08  |      | Expressed protein                                     |                 |
| Pc_TC087775 | -0.86 | 0.2   |      | -1.83 | 0.03      | Down | 1.8   | 0.08      |      | 0.46  | 0.53  |      | Expressed protein                                     |                 |
| Pc_TC087801 | 1.12  | 0.03  | Up   | 0.74  | 0.24      |      | -0.98 | 0.35      |      | 0.31  | 0.64  |      | Expressed protein                                     |                 |
| Pc_TC087809 | -0.81 | 0.37  |      | -0.34 | 0.75      |      | 0.36  | 0.78      |      | -2.26 | 0.04  | Down | Calcium-dependent protein kinase family protein       |                 |
| Pc_TC087813 | -0.75 | 0.13  |      | -1.75 | 0.01      | Down | 0.2   | 0.84      |      | 0.88  | 0.14  |      | Leucine-rich repeat protein kinase family protein     |                 |
| Pc_TC087815 | 2.1   | 0     | Up   | 0     | 1.02E-005 |      | 2.02  | 0.06      |      | -0.21 | 0.81  |      | Os03g0761000 protein                                  |                 |
| Pc_TC087816 | 0.02  | 1     |      | 1.6   | 0.02      | Up   | 0.9   | 0.41      |      | -0.92 | 0.28  |      | Expressed protein                                     | SWI/SNF-BAF6NAb |
| Pc_TC087844 | 0.76  | 0.28  |      | 1.86  | 0.01      | Up   | -1.22 | 0.33      |      | -0.47 | 0.61  |      | Putative uncharacterized protein OJ1333 C12.8         |                 |
| Pc_TC087850 | 1.82  | 0.01  | Up   | 1.17  | 0.16      |      | 1.96  | 0.09      |      | 1.43  | 0.08  |      | Expressed protein                                     |                 |
| Pc_TC087880 | 0.64  | 0.2   |      | 0.78  | 0.19      |      | -4.78 | 0         | Down | -2.06 | 0     | Down | Expressed protein                                     |                 |
| Pc_TC087891 | -1.34 | 0.03  | Down | -0.98 | 0.16      |      | -0.5  | 0.63      |      | -1.15 | 0.11  |      | Expressed protein                                     |                 |
| Pc_TC087895 | 0.5   | 0.31  |      | 0.65  | 0.27      |      | -4.44 | 0         | Down | -1.58 | 0.02  | Down | Expressed protein                                     |                 |
| Pc_TC087901 | -3.83 | 0.04  | Down | -0.04 | 1         |      | 2.17  | 0.09      |      | 1.3   | 0.2   |      | Expressed protein                                     |                 |
| Pc_TC087911 | -0.83 | 0.4   |      | -0.68 | 0.54      |      | -4.4  | 0.01      | Down | -2.28 | 0.05  | Down | Expressed protein                                     |                 |
| Pc_TC087925 | -0.59 | 0.25  |      | -2.73 | 0         | Down | 1.12  | 0.24      |      | 1.13  | 0.06  |      | Expressed protein                                     |                 |
| Pc_TC087926 | -1.42 | 0.04  | Down | -1.02 | 0.2       |      | 1.14  | 0.28      |      | -0.63 | 0.42  |      | Expressed protein                                     |                 |
| Pc_TC087939 | 0.75  | 0.18  |      | 0.83  | 0.21      |      | -4.19 | 0         | Down | -1.83 | 0.02  | Down | Expressed protein                                     |                 |
| Pc_TC087954 | -1.27 | 0.04  | Down | -1.08 | 0.13      |      | -0.51 | 0.63      |      | -0.94 | 0.19  |      | Coatome,beta' subunit                                 |                 |
| Pc_TC087955 | -0.24 | 0.74  |      | -0.19 | 0.83      |      | 1.32  | 0.22      |      | 1.66  | 0.02  | Up   | Coatome,beta' subunit                                 |                 |
| Pc_TC087969 | 0.06  | 0.87  |      | 0.37  | 0.43      |      | -1.86 | 0.04      | Down | -1.35 | 0.02  | Down | Expressed protein                                     |                 |
| Pc_TC087970 | -0.2  | 0.74  |      | -1.67 | 0.02      | Down | 0.45  | 0.66      |      | 0.12  | 0.87  |      | Expressed protein                                     |                 |
| Pc_TC087971 | -2.51 | 0.08  |      | -4.11 | 0.03      | Down | 0.62  | 0.67      |      | 0.46  | 0.7   |      | Expressed protein                                     |                 |
| Pc_TC087991 | 0.4   | 0.48  |      | 1.04  | 0.1       |      | -2.36 | 0.04      | Down | -0.91 | 0.22  |      | Expressed protein                                     |                 |
| Pc_TC087997 | -1.26 | 0.04  | Down | -0.83 | 0.23      |      | -0.34 | 0.75      |      | -0.28 | 0.7   |      | Uncharacterized protein                               |                 |
| Pc_TC087998 | 0.87  | 0.16  |      | 0.54  | 0.48      |      | 0.9   | 0.41      |      | 1.63  | 0.02  | Up   | Uncharacterized protein                               |                 |
| Pc_TC088004 | -1.06 | 0.15  |      | 0.27  | 0.73      |      | 0.07  | 0.96      |      | -1.8  | 0.04  | Down | FK506 BINDING PROTEIN 53                              |                 |
| Pc_TC088006 | -1.2  | 0.04  | Down | -2.52 | 0         | Down | -0.17 | 0.87      |      | 0.21  | 0.76  |      | FK506 BINDING PROTEIN 53                              |                 |
| Pc_TC088014 | -0.23 | 0.66  |      | 1.61  | 0         | Up   | -2.19 | 0.04      | Down | -0.94 | 0.16  |      | Expressed protein                                     |                 |
| Pc_TC088018 | 0.02  | 1     |      | 0.93  | 0.2       |      | -2.74 | 0.03      | Down | -1.49 | 0.08  |      | Expressed protein                                     |                 |
| Pc_TC088019 | -0.02 | 1     |      | 0.54  | 0.53      |      | -2.53 | 0.07      |      | -2.41 | 0.02  | Down | Uncharacterized protein                               |                 |
| Pc_TC088028 | -0.36 | 0.52  |      | -0.76 | 0.26      |      | 2.43  | 0.01      | Up   | 1.42  | 0.03  | Up   | Expressed protein                                     |                 |
| Pc_TC088034 | 0.39  | 0.5   |      | 0.95  | 0.15      |      | -3.9  | 0         | Down | -3.56 | ##### | Down | Uncharacterized protein                               |                 |
| Pc_TC088039 | 0.6   | 0.36  |      | 0.08  | 0.94      |      | 0.05  | 0.98      |      | 1.54  | 0.03  | Up   | Os05g0369500 protein                                  |                 |
| Pc_TC088043 | 0.2   | 0.7   |      | 0.56  | 0.36      |      | -2.66 | 0.02      | Down | -1.72 | 0.02  | Down | phospholipid sterol acyl transferase 1                |                 |
| Pc_TC088061 | 3.79  | ##### | Up   | 2.54  | 0.03      | Up   | 1.65  | 0.29      |      | 2.57  | 0.02  | Up   | Expressed protein                                     |                 |
| Pc_TC088062 | 0.24  | 0.74  |      | -0.25 | 0.77      |      | -3.98 | 0.01      | Down | 0.33  | 0.69  |      | Expressed protein                                     |                 |
| Pc_TC088074 | -3.09 | 0.04  | Down | -1.53 | 0.28      |      | -3.67 | 0.06      |      | -1.96 | 0.15  |      | Expressed protein                                     |                 |
| Pc_TC088085 | -0.03 | 0.95  |      | 0.15  | 0.79      |      | -2.68 | 0.01      | Down | -1.46 | 0.03  | Down | Expressed protein                                     |                 |
| Pc_TC088095 | -0.77 | 0.17  |      | -0.82 | 0.22      |      | 2.66  | 0.01      | Up   | 0.85  | 0.18  |      | Expressed protein                                     |                 |
| Pc_TC088115 | -0.2  | 0.75  |      | 1.49  | 0.02      | Up   | -3.07 | 0.01      | Down | 0.09  | 0.91  |      | RNase L inhibitor protein-related                     |                 |
| Pc_TC088118 | 0.21  | 0.74  |      | 0.26  | 0.72      |      | -3.44 | 0.01      | Down | -2.27 | 0.01  | Down | UniRef100                                             |                 |
| Pc_TC088124 | -2.18 | 0.01  | Down | -1.92 | 0.04      | Down | -2.04 | 0.1       |      | -1.74 | 0.05  |      | Expressed protein                                     |                 |
| Pc_TC088163 | 0.22  | 0.63  |      | 0.82  | 0.14      |      | -4.14 | 0         | Down | -2.8  | ##### | Down | Expressed protein                                     |                 |
| Pc_TC088175 | -2.42 | 0.02  | Down | -1.22 | 0.26      |      | -1.78 | 0.2       |      | -3.46 | 0.01  | Down | Expressed protein                                     |                 |
| Pc_TC088182 | 0.82  | 0.43  |      | 1.15  | 0.29      |      | 2.86  | 0.02      | Up   | 2.08  | 0.03  | Up   | Os06g0484800 protein                                  |                 |
| Pc_TC088183 | -0.58 | 0.55  |      | -2.53 | 0.05      | Down | 2.1   | 0.07      |      | 0.65  | 0.48  |      | Os06g0484800 protein                                  |                 |
| Pc_TC088185 | -0.47 | 0.43  |      | -0.42 | 0.55      |      | 2.21  | 0.03      | Up   | 1.09  | 0.1   |      | Expressed protein                                     |                 |
| Pc_TC088196 | 2.38  | ##### | Up   | -7.14 | 6.14E-012 | Down | 1.57  | 0.1       |      | 0.2   | 0.75  |      | glyceraldehyde-3-phosphate dehydrogenase of plastid 1 |                 |
| Pc_TC088203 | 0.66  | 0.47  |      | 1.33  | 0.16      |      | -4.96 | 0.02      | Down | -4.83 | 0     | Down | Beta-amylase                                          |                 |
| Pc_TC088204 | -0.63 | 0.44  |      | -0.6  | 0.52      |      | -6.11 | 0         | Down | -2.08 | 0.04  | Down | Expressed protein                                     |                 |
| Pc_TC088205 | 0.64  | 0.2   |      | 0.77  | 0.2       |      | -6.01 | 1.16E-005 | Down | -1.96 | 0.01  | Down | Uncharacterized protein                               | bZIP            |
| Pc_TC088215 | -0.81 | 0.43  |      | 1.82  | 0.03      | Up   | -3.61 | 0.03      | Down | -0.12 | 0.94  |      | Expressed protein                                     |                 |
| Pc_TC088216 | 0.72  | 0.17  |      | 0.84  | 0.18      |      | -3.49 | 0         | Down | -0.39 | 0.58  |      | Expressed protein                                     |                 |
| Pc_TC088241 | 1.69  | 0.03  | Up   | 0     | 0         |      | 1.7   | 0.16      |      | 0.02  | 1     |      | translocase inner membrane subunit 17-2               |                 |

|             |       |       |      |       |           |      |       |           |      |       |       |      |                                                   |
|-------------|-------|-------|------|-------|-----------|------|-------|-----------|------|-------|-------|------|---------------------------------------------------|
| Pc_TC088255 | 0.31  | 0.59  |      | 1.15  | 0.07      |      | -3.79 | 0         | Down | -2.67 | 0     | Down | Uncharacterized protein                           |
| Pc_TC088261 | -0.84 | 0.31  |      | 0.44  | 0.61      |      | -0.25 | 0.85      |      | -2.99 | 0.01  | Down | cycloartenol synthase 1                           |
| Pc_TC088263 | -2.18 | 0.02  | Down | 1.28  | 0.1       |      | -1.56 | 0.22      |      | -0.92 | 0.32  |      | cycloartenol synthase 1                           |
| Pc_TC088306 | -0.7  | 0.52  |      | 0.72  | 0.47      |      | -1.27 | 0.39      |      | -3.96 | 0.01  | Down | OSIGBa0145N07.3 protein                           |
| Pc_TC088337 | 1     | 0.42  |      | 2.25  | 0.04      | Up   | -3.67 | 0.15      |      | 0     | 0.04  |      | Expressed protein                                 |
| Pc_TC088350 | 0.14  | 0.7   |      | 0.63  | 0.15      |      | -5.21 | 1.12E-006 | Down | -2.34 | ##### | Down | Expressed protein                                 |
| Pc_TC088369 | -0.55 | 0.46  |      | -2.31 | 0.02      | Down | 0.28  | 0.82      |      | -0.42 | 0.62  |      | Expressed protein                                 |
| Pc_TC088375 | 0.2   | 0.68  |      | 0.71  | 0.21      |      | -7.33 | 3.27E-007 | Down | -3.37 | ##### | Down | Expressed protein                                 |
| Pc_TC088379 | 0.16  | 0.85  |      | 1.02  | 0.19      |      | -3.08 | 0.03      | Down | -0.88 | 0.32  |      | Expressed protein                                 |
| Pc_TC088390 | -1.03 | 0.31  |      | -0.36 | 0.76      |      | 0.12  | 0.95      |      | -2.6  | 0.03  | Down | Uncharacterized protein                           |
| Pc_TC088400 | -0.84 | 0.29  |      | 1.12  | 0.15      |      | -1.42 | 0.26      |      | -3.3  | 0     | Down | heat shock protein 90.1                           |
| Pc_TC088413 | 0     | 0.12  |      | -0.43 | 0.91      |      | 2.89  | 0.04      | Up   | 1.4   | 0.28  |      | Expressed protein                                 |
| Pc_TC088415 | 1.65  | 0     | Up   | 0     | 2.72E-008 |      | 1.86  | 0.07      |      | 0.09  | 0.91  |      | heat shock protein 70                             |
| Pc_TC088453 | -0.02 | 1     |      | -1.53 | 0.19      |      | 1.28  | 0.28      |      | -2.28 | 0.05  | Down | Expressed protein                                 |
| Pc_TC088457 | -1.04 | 0.17  |      | -2.06 | 0.03      | Down | 1.3   | 0.23      |      | 0.84  | 0.27  |      | Expressed protein                                 |
| Pc_TC088478 | 0.04  | 1     |      | 0.49  | 0.6       |      | -1.5  | 0.27      |      | -2.46 | 0.03  | Down | Uncharacterized protein                           |
| Pc_TC088499 | 2.13  | 0.01  | Up   | 0     | 0.02      |      | 1.97  | 0.12      |      | 0.36  | 0.79  |      | ARM repeat superfamily protein                    |
| Pc_TC088505 | -0.44 | 0.64  |      | -2.99 | 0.02      | Down | 0.73  | 0.56      |      | -0.46 | 0.65  |      | Expressed protein                                 |
| Pc_TC088507 | -1.18 | 0.04  | Down | -0.9  | 0.18      |      | 0.37  | 0.72      |      | 0.32  | 0.63  |      | Expressed protein                                 |
| Pc_TC088512 | -0.38 | 0.46  |      | -1.28 | 0.05      | Down | 0.01  | 1         |      | 0.42  | 0.5   |      | Uncharacterized protein                           |
| Pc_TC088514 | 1.53  | 0.03  | Up   | 0     | 0         |      | 1.71  | 0.13      |      | -0.41 | 0.68  |      | ATPase,V0 complex,subunit E                       |
| Pc_TC088517 | 0.71  | 0.25  |      | 0.45  | 0.55      |      | -4.08 | 0         | Down | -0.56 | 0.49  |      | Expressed protein                                 |
| Pc_TC088521 | 0.46  | 0.44  |      | 1.45  | 0.02      | Up   | -4.08 | 0         | Down | -2.47 | 0     | Down | Expressed protein                                 |
| Pc_TC088524 | -0.36 | 0.5   |      | -1.33 | 0.05      | Down | 0.83  | 0.39      |      | 0.01  | 1     |      | Expressed protein                                 |
| Pc_TC088534 | -2.01 | 0.15  |      | -3.03 | 0.08      |      | -4.58 | 0.03      | Down | -2.46 | 0.09  |      | Expressed protein                                 |
| Pc_TC088541 | -0.92 | 0.24  |      | -0.5  | 0.58      |      | 2.17  | 0.05      | Up   | 1.45  | 0.05  |      | Expressed protein                                 |
| Pc_TC088543 | 0.68  | 0.15  |      | 0.94  | 0.1       |      | -3.59 | 0         | Down | 0.15  | 0.82  |      | Expressed protein                                 |
| Pc_TC088548 | -0.92 | 0.25  |      | -2.06 | 0.04      | Down | 0.12  | 0.93      |      | -0.08 | 0.95  |      | Expressed protein                                 |
| Pc_TC088567 | 0.12  | 0.81  |      | 0.42  | 0.49      |      | -2.46 | 0.02      | Down | -1.66 | 0.02  | Down | OSIGBa007614.9 protein                            |
| Pc_TC088581 | -0.57 | 0.43  |      | 0.32  | 0.68      |      | -4.4  | 0         | Down | -2.8  | 0     | Down | Expressed protein                                 |
| Pc_TC088589 | 0.26  | 0.75  |      | -0.49 | 0.61      |      | 1.27  | 0.26      |      | 1.58  | 0.04  | Up   | Expressed protein                                 |
| Pc_TC088590 | 0.32  | 0.6   |      | 1.35  | 0.04      | Up   | -4.01 | 0         | Down | -3.6  | 0     | Down | Expressed protein                                 |
| Pc_TC088595 | -0.21 | 0.78  |      | -0.23 | 0.79      |      | 2.33  | 0.03      | Up   | 1.31  | 0.07  |      | Expressed protein                                 |
| Pc_TC088607 | 0.63  | 0.36  |      | 1.63  | 0.02      | Up   | -4.35 | 0         | Down | -1.06 | 0.23  |      | Expressed protein                                 |
| Pc_TC088623 | -2.09 | 0.01  | Down | -1.53 | 0.09      |      | -0.97 | 0.41      |      | -0.61 | 0.46  |      | RAB GTPASE HOMOLOG B18                            |
| Pc_TC088632 | 1.11  | 0.06  |      | 0.83  | 0.25      |      | -1.17 | 0.31      |      | 3     | ##### | Up   | Expressed protein                                 |
| Pc_TC088636 | 0.39  | 0.54  |      | -0.06 | 0.96      |      | 1.87  | 0.07      |      | 1.89  | 0.01  | Up   | Expressed protein                                 |
| Pc_TC088645 | 1.99  | 0.06  |      | 0.23  | 0.97      |      | 3.95  | 0         | Up   | 2.63  | 0.01  | Up   | Expressed protein                                 |
| Pc_TC088648 | 1.3   | 0.03  | Up   | 0.4   | 0.6       |      | 1.12  | 0.3       |      | 1.76  | 0.01  | Up   | Uncharacterized protein                           |
| Pc_TC088653 | -4.01 | 0.02  | Down | -0.71 | 0.62      |      | 1.39  | 0.29      |      | 0.29  | 0.83  |      | Expressed protein                                 |
| Pc_TC088668 | 1.12  | 0.08  |      | 1.46  | 0.04      | Up   | -0.77 | 0.52      |      | 1.35  | 0.07  |      | Expressed protein                                 |
| Pc_TC088672 | -0.4  | 0.44  |      | -1.36 | 0.04      | Down | 1.66  | 0.08      |      | 0.6   | 0.34  |      | Expressed protein                                 |
| Pc_TC088679 | 0.21  | 0.75  |      | -0.4  | 0.61      |      | -2.44 | 0.05      | Down | -1.94 | 0.02  | Down | Expressed protein                                 |
| Pc_TC088694 | 1.08  | 0.25  |      | 1.89  | 0.05      | Up   | -1.91 | 0.26      |      | -0.79 | 0.55  |      | Expressed protein                                 |
| Pc_TC088696 | 1.08  | 0.77  |      | 3.06  | 0.08      |      | 3.83  | 0.03      | Up   | 3.08  | 0.06  |      | Os06g0587900 protein                              |
| Pc_TC088703 | -0.85 | 0.17  |      | -0.01 | 1         |      | -2.35 | 0.04      | Down | -1.77 | 0.02  | Down | Expressed protein                                 |
| Pc_TC088708 | 2.15  | ##### | Up   | 0     | 1.15E-007 |      | 1.73  | 0.1       |      | 1.05  | 0.14  |      | Insulinase (Peptidase family M16) protein         |
| Pc_TC088713 | 0.95  | 0.19  |      | 2.04  | 0.01      | Up   | -3.82 | 0.01      | Down | -3.7  | 0     | Down | Putative uncharacterized protein OJ1123 B01.131-1 |
| Pc_TC088732 | 0.06  | 0.86  |      | 0.39  | 0.37      |      | -1.41 | 0.11      |      | -1.3  | 0.02  | Down | Expressed protein                                 |
| Pc_TC088743 | -0.41 | 0.62  |      | 0.47  | 0.59      |      | -0.75 | 0.54      |      | -2.4  | 0.02  | Down | Expressed protein                                 |
| Pc_TC088744 | 0.37  | 0.55  |      | 0.44  | 0.55      |      | -1.85 | 0.11      |      | -1.69 | 0.04  | Down | Expressed protein                                 |
| Pc_TC088747 | -0.65 | 0.23  |      | -1.37 | 0.04      | Down | 0.37  | 0.72      |      | -0.03 | 0.97  |      | Expressed protein                                 |
| Pc_TC088748 | 0.52  | 0.41  |      | 0.45  | 0.55      |      | -3.3  | 0.01      | Down | 0.13  | 0.88  |      | Expressed protein                                 |
| Pc_TC088749 | -0.32 | 0.54  |      | -1.38 | 0.03      | Down | 1.19  | 0.21      |      | 0.2   | 0.76  |      | Expressed protein                                 |
| Pc_TC088754 | -3.73 | 0.05  | Down | -0.58 | 0.72      |      | -1.98 | 0.27      |      | -2.18 | 0.15  |      | eukaryotic initiation factor 4A-III               |
| Pc_TC088755 | 1.68  | 0     | Up   | 0     | 1.73E-007 |      | 1.22  | 0.25      |      | 0.27  | 0.72  |      | isocitrate dehydrogenase                          |
| Pc_TC088756 | 0.93  | 0.3   |      | 1.57  | 0.09      |      | -0.73 | 0.63      |      | -3.7  | 0.02  | Down | Expressed protein                                 |
| Pc_TC088765 | 2.64  | ##### | Up   | 0     | 0         |      | 1.37  | 0.23      |      | 0.11  | 0.93  |      | translation initiation factor 3B1                 |
| Pc_TC088781 | 0.24  | 0.76  |      | 1.8   | 0.01      | Up   | -0.84 | 0.5       |      | -0.72 | 0.42  |      | Expressed protein                                 |
| Pc_TC088782 | -3.24 | 0.03  | Down | 0.98  | 0.33      |      | -1.36 | 0.38      |      | -1    | 0.41  |      | Heat shock protein 70 (Hsp 70) family protein     |
| Pc_TC088801 | -1.68 | 0.01  | Down | -0.27 | 0.71      |      | 0.53  | 0.61      |      | 0.23  | 0.75  |      | Expressed protein                                 |
| Pc_TC088805 | 1.6   | 0.06  |      | -0.36 | 0.83      |      | -0.5  | 0.77      |      | 2.45  | 0.01  | Up   | Os02g0803200 protein                              |



|             |       |       |      |       |           |      |       |           |      |       |       |      |                                                    |  |
|-------------|-------|-------|------|-------|-----------|------|-------|-----------|------|-------|-------|------|----------------------------------------------------|--|
| Pc_TC088809 | -0.23 | 0.67  |      | 0.24  | 0.71      |      | -2.55 | 0.02      | Down | -1.54 | 0.03  | Down | Cytochrome b-c1 complex                            |  |
| Pc_TC088811 | 0.21  | 0.66  |      | 0.52  | 0.36      |      | -1.3  | 0.2       |      | -1.73 | 0.01  | Down | Cytochrome b-c1 complex                            |  |
| Pc_TC088813 | -0.16 | 0.88  |      | 0.82  | 0.33      |      | 1.46  | 0.2       |      | 2.41  | 0     | Up   | Putative uncharacterized protein                   |  |
| Pc_TC088817 | 0     | 1     |      | -0.61 | 0.36      |      | -2.07 | 0.06      |      | -1.5  | 0.04  | Down | Expressed protein                                  |  |
| Pc_TC088829 | -3.17 | 0.04  | Down | -1.38 | 0.31      |      | 0.46  | 0.75      |      | -0.72 | 0.56  |      | Expressed protein                                  |  |
| Pc_TC088832 | 0.74  | 0.2   |      | 0.7   | 0.32      |      | -5.67 | 0         | Down | -1.4  | 0.08  |      | Expressed protein                                  |  |
| Pc_TC088847 | 0.78  | 0.16  |      | 1.05  | 0.11      |      | -3.37 | 0.01      | Down | -2.42 | 0     | Down | Uncharacterized protein                            |  |
| Pc_TC088849 | -0.13 | 0.89  |      | 0.48  | 0.57      |      | -3.64 | 0.01      | Down | -1.52 | 0.1   |      | Expressed protein                                  |  |
| Pc_TC088857 | 0.16  | 0.75  |      | 0.34  | 0.56      |      | -1.4  | 0.17      |      | -1.44 | 0.03  | Down | Uncharacterized protein                            |  |
| Pc_TC088863 | 0.34  | 0.57  |      | 0.68  | 0.32      |      | -2.37 | 0.04      | Down | -1.51 | 0.05  |      | Expressed protein                                  |  |
| Pc_TC088865 | 0.23  | 0.56  |      | 0.44  | 0.37      |      | -7.26 | 1.18E-008 | Down | -3.17 | ##### | Down | Expressed protein                                  |  |
| Pc_TC088866 | -0.88 | 0.32  |      | -3.23 | 0.01      | Down | -0.88 | 0.5       |      | -0.23 | 0.82  |      | Expressed protein                                  |  |
| Pc_TC088867 | -0.6  | 0.58  |      | -4.53 | 0.01      | Down | 1.09  | 0.39      |      | 1.02  | 0.27  |      | Expressed protein                                  |  |
| Pc_TC088893 | -2.35 | 0.02  | Down | -3.37 | 0.01      | Down | 1.43  | 0.21      |      | -0.1  | 0.93  |      | Expressed protein                                  |  |
| Pc_TC088902 | 0.38  | 0.38  |      | 0.6   | 0.25      |      | -2.51 | 0.01      | Down | -1.06 | 0.09  |      | Expressed protein                                  |  |
| Pc_TC088920 | 0.11  | 0.91  |      | 0.29  | 0.75      |      | -1.44 | 0.26      |      | -1.99 | 0.05  | Down | Expressed protein                                  |  |
| Pc_TC088923 | -0.6  | 0.37  |      | -0.03 | 0.98      |      | -1.02 | 0.37      |      | -1.68 | 0.04  | Down | Expressed protein                                  |  |
| Pc_TC088940 | 0.71  | 0.03  |      | 0.66  | 0.12      |      | -2.88 | 0         | Down | -1.6  | 0     | Down | Expressed protein                                  |  |
| Pc_TC088941 | 0.72  | 0.03  |      | 0.51  | 0.23      |      | -2.76 | 0         | Down | -1.66 | 0     | Down | Expressed protein                                  |  |
| Pc_TC088944 | -1.73 | 0.24  |      | -0.58 | 0.72      |      | -3.3  | 0.1       |      | -4.18 | 0.03  | Down | Expressed protein                                  |  |
| Pc_TC088945 | -1.76 | 0.03  | Down | 0.19  | 0.83      |      | -0.41 | 0.74      |      | -0.12 | 0.91  |      | serine/threonine phosphatase 7                     |  |
| Pc_TC088956 | -0.11 | 0.85  |      | 0.16  | 0.82      |      | -1.4  | 0.2       |      | -2.39 | 0     | Down | Protein of unknown function (DUF810)               |  |
| Pc_TC088960 | 0.91  | 0.16  |      | 1.52  | 0.03      | Up   | -0.43 | 0.72      |      | 0.51  | 0.52  |      | Expressed protein                                  |  |
| Pc_TC088966 | -0.04 | 0.96  |      | 1.23  | 0.04      | Up   | -2.59 | 0.02      | Down | -1.87 | 0.01  | Down | Expressed protein                                  |  |
| Pc_TC088973 | -0.35 | 0.67  |      | -0.12 | 0.91      |      | 0     | 0         |      | -4.05 | 0     | Down | Expressed protein                                  |  |
| Pc_TC088980 | 0.31  | 0.68  |      | 0.49  | 0.56      |      | -5.2  | 0         | Down | -2.49 | 0.01  | Down | Putative uncharacterized protein                   |  |
| Pc_TC088986 | 1.12  | 0.04  | Up   | 1.51  | 0.02      | Up   | 0.33  | 0.76      |      | 0.88  | 0.2   |      | Expressed protein                                  |  |
| Pc_TC088987 | -0.24 | 0.61  |      | -0.25 | 0.66      |      | -1.46 | 0.14      |      | -1.97 | 0     | Down | Expressed protein                                  |  |
| Pc_TC089002 | 0.03  | 1     |      | 0.2   | 0.82      |      | -3.01 | 0.03      | Down | -1.3  | 0.15  |      | Expressed protein                                  |  |
| Pc_TC089005 | -0.14 | 0.82  |      | -1.67 | 0.03      | Down | 0.06  | 0.96      |      | -0.35 | 0.63  |      | Expressed protein                                  |  |
| Pc_TC089021 | -0.46 | 0.74  |      | -0.62 | 0.67      |      | 0.31  | 0.86      |      | -4.37 | 0.02  | Down | Expressed protein                                  |  |
| Pc_TC089036 | -0.47 | 0.44  |      | -1.06 | 0.15      |      | 2.29  | 0.02      | Up   | 0.4   | 0.57  |      | Uncharacterized protein                            |  |
| Pc_TC089037 | 0.01  | 0.99  |      | 0.38  | 0.48      |      | -1.41 | 0.15      |      | -1.27 | 0.04  | Down | Expressed protein                                  |  |
| Pc_TC089043 | -0.11 | 0.96  |      | 0.64  | 0.53      |      | -1.08 | 0.46      |      | -2.96 | 0.03  | Down | Expressed protein                                  |  |
| Pc_TC089050 | 0.71  | 0.34  |      | 0.76  | 0.38      |      | -3.01 | 0.04      | Down | -1.53 | 0.13  |      | Expressed protein                                  |  |
| Pc_TC089054 | -0.46 | 0.6   |      | -0.33 | 0.74      |      | -3.89 | 0.01      | Down | -2.96 | 0.01  | Down | Uncharacterized protein                            |  |
| Pc_TC089057 | 0.16  | 0.85  |      | 0.42  | 0.62      |      | -2.05 | 0.11      |      | -2.64 | 0.01  | Down | Uncharacterized protein                            |  |
| Pc_TC089075 | -1.64 | 0.04  | Down | -2.53 | 0.01      | Down | 0.47  | 0.68      |      | -1.72 | 0.05  |      | Expressed protein                                  |  |
| Pc_TC089092 | -0.16 | 0.81  |      | 0.6   | 0.37      |      | -1.37 | 0.22      |      | -1.71 | 0.03  | Down | Expressed protein                                  |  |
| Pc_TC089117 | -0.45 | 0.63  |      | 0.41  | 0.66      |      | -3.08 | 0.04      | Down | -2.74 | 0.02  | Down | Expressed protein                                  |  |
| Pc_TC089119 | 0.72  | 0.32  |      | 1.22  | 0.12      |      | -1.82 | 0.17      |      | -5.87 | ##### | Down | Expressed protein                                  |  |
| Pc_TC089120 | 0.35  | 0.7   |      | 1.27  | 0.15      |      | -2.55 | 0.09      |      | -2.43 | 0.04  | Down | Expressed protein                                  |  |
| Pc_TC089122 | 0.47  | 0.72  |      | 0.36  | 0.82      |      | -2.2  | 0.24      |      | -4.08 | 0.04  | Down | Expressed protein                                  |  |
| Pc_TC089123 | -0.26 | 0.78  |      | 1.06  | 0.21      |      | -3.74 | 0.02      | Down | -4.04 | 0     | Down | Expressed protein                                  |  |
| Pc_TC089126 | 0.2   | 0.7   |      | 0.47  | 0.44      |      | -2.93 | 0.01      | Down | -1.89 | 0.01  | Down | heavy metal atpase 2                               |  |
| Pc_TC089127 | -2.01 | 0     | Down | 0.53  | 0.35      |      | -3.03 | 0.01      | Down | -1.48 | 0.03  | Down | heavy metal atpase 2                               |  |
| Pc_TC089168 | -0.86 | 0.11  |      | -1.35 | 0.04      | Down | -0.92 | 0.37      |      | -0.86 | 0.2   |      | Uncharacterized protein                            |  |
| Pc_TC089177 | -1.77 | 0.01  | Down | 1.31  | 0.05      | Up   | -0.6  | 0.58      |      | -1.52 | 0.05  |      | Putative uncharacterized protein (Fragment)        |  |
| Pc_TC089178 | 0     | ##### |      | -5.89 | 9.19E-010 | Down | -7.45 | 8.86E-007 | Down | -5.74 | ##### | Down | Expressed protein                                  |  |
| Pc_TC089189 | -0.18 | 0.96  |      | -0.2  | 0.95      |      | 5.1   | 3.12E-005 | Up   | 3.89  | ##### | Up   | Expressed protein                                  |  |
| Pc_TC089197 | 3.78  | 0.05  | Up   | 3.52  | 0.11      |      | 3.5   | 0.15      |      | 0     | 0.9   |      | Expressed protein                                  |  |
| Pc_TC089198 | -0.04 | 0.98  |      | 0.69  | 0.35      |      | -3.42 | 0.01      | Down | -2.3  | 0.01  | Down | Expressed protein                                  |  |
| Pc_TC089199 | -1.95 | 0.03  | Down | -0.35 | 0.72      |      | -1.34 | 0.3       |      | 0.7   | 0.4   |      | Pentatricopeptide repeat (PPR) superfamily protein |  |
| Pc_TC089202 | 0.23  | 0.66  |      | 0.46  | 0.46      |      | -2.5  | 0.03      | Down | -1.05 | 0.14  |      | Expressed protein                                  |  |
| Pc_TC089207 | 0.03  | 0.97  |      | 0.72  | 0.21      |      | -2.76 | 0.01      | Down | -1.85 | 0.01  | Down | Expressed protein                                  |  |
| Pc_TC089223 | -2.62 | 0.01  | Down | -2.18 | 0.03      | Down | -0.95 | 0.44      |      | -0.52 | 0.56  |      | Expressed protein                                  |  |
| Pc_TC089238 | 0.7   | 0.35  |      | 1.93  | 0.01      | Up   | -5.78 | 0         | Down | -2.85 | 0.01  | Down | OJ000114 01.14 protein                             |  |
| Pc_TC089241 | 1.75  | 0.01  | Up   | -0.83 | 0.37      |      | 1.23  | 0.27      |      | 1.08  | 0.17  |      | Expressed protein                                  |  |
| Pc_TC089244 | 2.65  | 0     | Up   | 0     | 0.02      |      | 2.15  | 0.09      |      | 1.47  | 0.14  |      | Expressed protein                                  |  |
| Pc_TC089249 | -0.98 | 0.12  |      | -1.64 | 0.03      | Down | 0.84  | 0.42      |      | 0.21  | 0.78  |      | Expressed protein                                  |  |
| Pc_TC089254 | 0.54  | 0.32  |      | 0.61  | 0.35      |      | -4.42 | 0         | Down | -2.63 | 0     | Down | Expressed protein                                  |  |
| Pc_TC089261 | 0.47  | 0.44  |      | 0.06  | 0.95      |      | -2.71 | 0.03      | Down | -1.96 | 0.02  | Down | Expressed protein                                  |  |

|             |       |       |      |  |       |      |      |  |       |           |      |       |       |      |                                                                     |
|-------------|-------|-------|------|--|-------|------|------|--|-------|-----------|------|-------|-------|------|---------------------------------------------------------------------|
| Pc_TC089263 | 0.4   | 0.45  |      |  | -0.07 | 0.92 |      |  | -2.81 | 0.01      | Down | -1.08 | 0.13  |      | Expressed protein                                                   |
| Pc_TC089267 | 0.66  | 0.47  |      |  | 1.27  | 0.18 |      |  | -4.96 | 0.02      | Down | -1.03 | 0.38  |      | Expressed protein                                                   |
| Pc_TC089268 | -1.75 | 0.09  |      |  | -1.13 | 0.3  |      |  | 2.5   | 0.03      | Up   | 1.34  | 0.11  |      | Expressed protein                                                   |
| Pc_TC089269 | 0     | 0.02  |      |  | 0     | 0.03 |      |  | 0     | 0.03      |      | -4.08 | 0.04  | Down | ribosomal protein 5B                                                |
| Pc_TC089306 | 2.46  | 0.01  | Up   |  | 1.59  | 0.17 |      |  | 2.64  | 0.05      | Up   | 2.28  | 0.03  | Up   | Expressed protein                                                   |
| Pc_TC089314 | 0.47  | 0.28  |      |  | 0.34  | 0.54 |      |  | -2.03 | 0.05      | Down | -0.55 | 0.37  |      | putative unclassified                                               |
| Pc_TC089315 | 0.95  | 0.38  |      |  | 2.45  | 0.01 | Up   |  | 0.78  | 0.62      |      | 2.56  | 0.01  | Up   | Expressed protein                                                   |
| Pc_TC089316 | -1.03 | 0.17  |      |  | -2.05 | 0.03 | Down |  | 2     | 0.06      |      | 0.69  | 0.37  |      | Expressed protein                                                   |
| Pc_TC089319 | -1.75 | 0.02  | Down |  | -2.42 | 0.01 | Down |  | -4.46 | 0         | Down | -1.85 | 0.03  | Down | Expressed protein                                                   |
| Pc_TC089337 | -0.46 | 0.57  |      |  | 0.47  | 0.58 |      |  | -3.5  | 0.02      | Down | -2.15 | 0.03  | Down | Expressed protein                                                   |
| Pc_TC089343 | -2.62 | 0.01  | Down |  | -1.12 | 0.23 |      |  | -0.91 | 0.46      |      | -0.1  | 0.93  |      | Disease resistance RPP8-like protein 3                              |
| Pc_TC089349 | 2.19  | 0     | Up   |  | 0     | 0    |      |  | 2.91  | 0.01      | Up   | 2.21  | 0.01  | Up   | Expressed protein                                                   |
| Pc_TC089359 | -0.93 | 0.16  |      |  | -1.15 | 0.14 |      |  | -2.79 | 0.02      | Down | 0.06  | 0.94  |      | Expressed protein                                                   |
| Pc_TC089377 | 0.41  | 0.28  |      |  | 0.42  | 0.38 |      |  | -2.36 | 0.01      | Down | -1.08 | 0.06  |      | Expressed protein                                                   |
| Pc_TC089385 | -2.35 | 0.02  | Down |  | -2.37 | 0.03 | Down |  | 1.25  | 0.27      |      | -0.25 | 0.8   |      | Uncharacterized protein                                             |
| Pc_TC089387 | 0.59  | 0.4   |      |  | -0.73 | 0.42 |      |  | 2.28  | 0.03      | Up   | 1.41  | 0.06  |      | Uncharacterized protein                                             |
| Pc_TC089402 | -0.45 | 0.44  |      |  | -1.43 | 0.05 | Down |  | -0.02 | 0.99      |      | 0.17  | 0.81  |      | Expressed protein                                                   |
| Pc_TC089407 | -0.65 | 0.47  |      |  | -0.43 | 0.67 |      |  | -0.7  | 0.59      |      | -2.45 | 0.03  | Down | Uncharacterized protein                                             |
| Pc_TC089432 | 0.66  | 0.47  |      |  | -0.59 | 0.64 |      |  | -0.15 | 0.94      |      | -2.83 | 0.04  | Down | Expressed protein                                                   |
| Pc_TC089441 | 0.4   | 0.58  |      |  | 1.28  | 0.09 |      |  | -4.33 | 0         | Down | -1.51 | 0.1   |      | Expressed protein                                                   |
| Pc_TC089458 | 0.25  | 0.6   |      |  | 0.98  | 0.08 |      |  | -2.69 | 0.01      | Down | -1.66 | 0.01  | Down | Expressed protein                                                   |
| Pc_TC089469 | 2.03  | 0.05  |      |  | 2.52  | 0.02 | Up   |  | -0.33 | 0.92      |      | 1.27  | 0.32  |      | Expressed protein                                                   |
| Pc_TC089470 | 0.18  | 0.65  |      |  | 0.29  | 0.56 |      |  | -4.47 | 4.20E-005 | Down | -1.35 | 0.02  | Down | Expressed protein                                                   |
| Pc_TC089475 | -1.1  | 0.03  | Down |  | -0.89 | 0.14 |      |  | 0.32  | 0.74      |      | -0.43 | 0.49  |      | Uncharacterized protein                                             |
| Pc_TC089477 | -0.4  | 0.53  |      |  | 0.42  | 0.55 |      |  | 0     | 3.04E-006 |      | -3.59 | ##### | Down | Expressed protein                                                   |
| Pc_TC089484 | -1.51 | 0.24  |      |  | 0     | 0.01 |      |  | 2.63  | 0.03      | Up   | 0.36  | 0.77  |      | Expressed protein                                                   |
| Pc_TC089485 | -1.71 | 0.02  | Down |  | -2.31 | 0.01 | Down |  | 2.05  | 0.05      | Up   | -0.17 | 0.83  |      | Expressed protein                                                   |
| Pc_TC089486 | -1.82 | 0.05  |      |  | -1.13 | 0.26 |      |  | 1.2   | 0.3       |      | -2.41 | 0.02  | Down | Expressed protein                                                   |
| Pc_TC089487 | 0.28  | 0.52  |      |  | 0.9   | 0.08 |      |  | -4.3  | 0         | Down | -2.74 | ##### | Down | Expressed protein                                                   |
| Pc_TC089489 | 0.53  | 0.36  |      |  | 0.89  | 0.18 |      |  | -3.63 | 0         | Down | -0.7  | 0.35  |      | putative unclassified                                               |
| Pc_TC089491 | 0.3   | 0.67  |      |  | 0.55  | 0.48 |      |  | -2.63 | 0.04      | Down | -1.37 | 0.12  |      | Expressed protein                                                   |
| Pc_TC089501 | 0.52  | 0.45  |      |  | 0.64  | 0.42 |      |  | -1.97 | 0.12      |      | -2.14 | 0.02  | Down | Expressed protein                                                   |
| Pc_TC089502 | 1.05  | 0.11  |      |  | 1.84  | 0.01 | Up   |  | -0.88 | 0.47      |      | -0.09 | 0.93  |      | Putative polyprotein                                                |
| Pc_TC089517 | 2.23  | 0.01  | Up   |  | 0     | 0.05 |      |  | 2.31  | 0.08      |      | 0.49  | 0.74  |      | 3-oxo-5-alpha-steroid 4-dehydrogenase family protein                |
| Pc_TC089543 | 0.38  | 0.44  |      |  | 0.28  | 0.65 |      |  | -2.07 | 0.05      |      | -2.11 | 0     | Down | putative Ty1-copia subclass                                         |
| Pc_TC089575 | 1.86  | 0.01  | Up   |  | 1.96  | 0.02 | Up   |  | 1.68  | 0.15      |      | 0.36  | 0.72  |      | Expressed protein                                                   |
| Pc_TC089576 | -1.08 | 0.08  |      |  | -2.04 | 0.01 | Down |  | -1.95 | 0.08      |      | -1.17 | 0.11  |      | Putative polyprotein                                                |
| Pc_TC089583 | -2.17 | 0.03  | Down |  | -1.02 | 0.32 |      |  | -1.22 | 0.35      |      | -1.37 | 0.17  |      | Uncharacterized                                                     |
| Pc_TC089588 | 0.33  | 0.42  |      |  | 0.6   | 0.24 |      |  | -2.05 | 0.04      | Down | -1.26 | 0.04  | Down | Expressed protein                                                   |
| Pc_TC089597 | 0.25  | 0.67  |      |  | 1.36  | 0.03 | Up   |  | -3.56 | 0         | Down | -2.05 | 0.01  | Down | Expressed protein                                                   |
| Pc_TC089605 | 1.56  | 0.27  |      |  | 2.59  | 0.04 | Up   |  | 1.57  | 0.37      |      | 3     | 0.01  | Up   | DNase I-like superfamily protein                                    |
| Pc_TC089610 | 3.54  | 0.08  |      |  | 3.52  | 0.11 |      |  | 0.5   | 1         |      | 4.15  | 0.02  | Up   | Expressed protein                                                   |
| Pc_TC089616 | 0.69  | 0.49  |      |  | 0.73  | 0.52 |      |  | -4.58 | 0.03      | Down | 0.82  | 0.44  |      | Putative uncharacterized protein                                    |
| Pc_TC089617 | 0.23  | 0.77  |      |  | 1.14  | 0.14 |      |  | -2.42 | 0.07      |      | -3.78 | 0     | Down | Putative uncharacterized protein                                    |
| Pc_TC089622 | 0.11  | 0.81  |      |  | 0.27  | 0.63 |      |  | -2    | 0.05      |      | -2.63 | 0     | Down | Expressed protein                                                   |
| Pc_TC089681 | -0.16 | 0.75  |      |  | -0.31 | 0.61 |      |  | -2.32 | 0.03      | Down | -0.89 | 0.18  |      | Uncharacterized protein                                             |
| Pc_TC089690 | 3.61  | 0     | Up   |  | 2.95  | 0.01 | Up   |  | 3.49  | 0.02      | Up   | 0.63  | 0.78  |      | structural maintenance of chromosome 3                              |
| Pc_TC089691 | -3.93 | ##### | Down |  | -0.84 | 0.25 |      |  | 0.74  | 0.47      |      | -0.29 | 0.69  |      | structural maintenance of chromosome 3                              |
| Pc_TC089697 | -2.51 | 0     | Down |  | -3.2  | 0    | Down |  | -1.69 | 0.15      |      | -3.05 | 0     | Down | nuclear RNA polymerase D1A                                          |
| Pc_TC089706 | 2.66  | 0.03  | Up   |  | 2.15  | 0.15 |      |  | 3.26  | 0.04      | Up   | 3.91  | 0     | Up   | Expressed protein                                                   |
| Pc_TC089739 | -0.33 | 0.6   |      |  | 1.01  | 0.13 |      |  | -3.42 | 0.01      | Down | -2.54 | 0     | Down | Expressed protein                                                   |
| Pc_TC089753 | 0.04  | 0.94  |      |  | 0.86  | 0.15 |      |  | -2.92 | 0.01      | Down | -1.97 | 0.01  | Down | Expressed protein                                                   |
| Pc_TC089754 | 0.22  | 0.57  |      |  | 0.59  | 0.22 |      |  | -3.18 | 0         | Down | -2    | 0     | Down | Expressed protein                                                   |
| Pc_TC089759 | -0.78 | 0.5   |      |  | -0.02 | 1    |      |  | -4.82 | 0.02      | Down | -1.7  | 0.18  |      | Polynucleotidyl transferase,ribonuclease H-like superfamily protein |
| Pc_TC089762 | 0.42  | 0.35  |      |  | 0.98  | 0.07 |      |  | -2.58 | 0.01      | Down | -0.69 | 0.27  |      | Putative uncharacterized protein                                    |
| Pc_TC089763 | 1.99  | 0     | Up   |  | 0.78  | 0.34 |      |  | 0.17  | 0.9       |      | 1.63  | 0.03  | Up   | Putative uncharacterized protein                                    |
| Pc_TC089765 | -3.44 | 0     | Down |  | -3.09 | 0    | Down |  | -0.55 | 0.63      |      | -0.25 | 0.76  |      | Expressed protein                                                   |
| Pc_TC089780 | 0.41  | 0.58  |      |  | -0.26 | 0.78 |      |  | -2.96 | 0.03      | Down | -0.66 | 0.45  |      | Expressed protein                                                   |
| Pc_TC089817 | -4.83 | 0     | Down |  | -3.26 | 0.02 | Down |  | -2.23 | 0.13      |      | -1.58 | 0.15  |      | Expressed protein                                                   |
| Pc_TC089825 | 0.29  | 0.39  |      |  | 0.18  | 0.68 |      |  | -2.35 | 0.01      | Down | -1.32 | 0.02  | Down | starch branching enzyme 2.1                                         |
| Pc_TC089843 | -0.71 | 0.56  |      |  | -0.02 | 1    |      |  | 2.87  | 0.02      | Up   | 0.46  | 0.68  |      | Expressed protein                                                   |
| Pc_TC089844 | -1.22 | 0.07  |      |  | -0.76 | 0.32 |      |  | 2.42  | 0.02      | Up   | 0.81  | 0.25  |      | Expressed protein                                                   |

|             |       |       |      |       |           |      |       |           |      |       |       |      |                                                             |
|-------------|-------|-------|------|-------|-----------|------|-------|-----------|------|-------|-------|------|-------------------------------------------------------------|
| Pc_TC089845 | 0.76  | 0.05  |      | 0.16  | 0.76      |      | -0.35 | 0.71      |      | 1.67  | 0     | Up   | Expressed protein                                           |
| Pc_TC089857 | -1.96 | 0.05  | Down | -4.15 | 0         | Down | 0.86  | 0.47      |      | 0.17  | 0.87  |      | Expressed protein                                           |
| Pc_TC089860 | 0.57  | 0.32  |      | 1.17  | 0.07      |      | -2.57 | 0.03      | Down | -0.42 | 0.57  |      | Putative uncharacterized protein                            |
| Pc_TC089867 | -0.92 | 0.43  |      | 1.06  | 0.29      |      | -3.23 | 0.07      |      | -3.7  | 0.02  | Down | Expressed protein                                           |
| Pc_TC089872 | -0.41 | 0.62  |      | -2.1  | 0.04      | Down | 0.84  | 0.46      |      | 0.6   | 0.47  |      | Expressed protein                                           |
| Pc_TC089879 | 2.13  | ##### | Up   | -7.24 | 5.48E-009 | Down | 1.68  | 0.09      |      | 0.25  | 0.72  |      | ribosomal protein large subunit 16A                         |
| Pc_TC089903 | -2.42 | 0.02  | Down | -0.44 | 0.68      |      | -1.12 | 0.4       |      | -0.56 | 0.58  |      | Expressed protein                                           |
| Pc_TC089910 | -3.51 | ##### | Down | -4.44 | 9.74E-007 | Down | -1.43 | 0.19      |      | -1.55 | 0.03  | Down | unknown protein                                             |
| Pc_TC089918 | 1.56  | 0.02  | Up   | 0     | 8.53E-005 |      | 1.62  | 0.15      |      | 0.21  | 0.83  |      | Ubiquitin-like superfamily protein                          |
| Pc_TC089923 | 0.68  | 0.22  |      | 1.34  | 0.03      | Up   | -1.6  | 0.15      |      | -1    | 0.17  |      | Putative polyprotein                                        |
| Pc_TC089925 | 0     | 0     |      | -3.33 | 0.04      | Down | 1.22  | 0.34      |      | 0     | 0     |      | Expressed protein                                           |
| Pc_TC089928 | -0.29 | 0.64  |      | -0.74 | 0.31      |      | 1.67  | 0.1       |      | 1.8   | 0.01  | Up   | O-Glycosyl hydrolases family 17 protein                     |
| Pc_TC089930 | 0.49  | 0.18  |      | 0.85  | 0.06      |      | -2.87 | 0         | Down | -1.94 | 0     | Down | Transducin/WD40 repeat-like superfamily protein             |
| Pc_TC089935 | -0.04 | 0.95  |      | 0.04  | 0.97      |      | -0.99 | 0.36      |      | -1.49 | 0.05  | Down | Expressed protein                                           |
| Pc_TC089939 | 1.66  | 0.03  | Up   | 1.32  | 0.14      |      | 1.16  | 0.35      |      | 2.95  | 0     | Up   | histone deacetylase 2C                                      |
| Pc_TC089940 | -2.58 | ##### | Down | -2.9  | 0         | Down | -0.66 | 0.53      |      | -1.48 | 0.04  | Down | histone deacetylase 2C                                      |
| Pc_TC089941 | 2.65  | 0     | Up   | 3.03  | 0         | Up   | 3.84  | 0         | Up   | 3.9   | ##### | Up   | histone deacetylase 2C                                      |
| Pc_TC089942 | -0.94 | 0.09  |      | -3.11 | 3.54E-005 | Down | 0.57  | 0.56      |      | -0.23 | 0.73  |      | histone deacetylase 3                                       |
| Pc_TC089943 | -1.17 | 0.2   |      | -2.38 | 0.04      | Down | -0.84 | 0.52      |      | -1.37 | 0.17  |      | histone deacetylase 2C                                      |
| Pc_TC089944 | -0.59 | 0.52  |      | 0.29  | 0.78      |      | 0     | 0         |      | -2.33 | 0.04  | Down | Expressed protein                                           |
| Pc_TC089945 | -2.92 | 0.03  | Down | -1.07 | 0.38      |      | 0.01  | 1         |      | -2.96 | 0.03  | Down | Expressed protein                                           |
| Pc_TC089955 | 1     | 0.42  |      | 2.25  | 0.04      | Up   | 0.14  | 1         |      | 0.46  | 0.79  |      | RAB GTPASE HOMOLOG B18                                      |
| Pc_TC089962 | 0.37  | 0.54  |      | 0.77  | 0.25      |      | -2.34 | 0.05      | Down | -0.61 | 0.42  |      | Expressed protein                                           |
| Pc_TC089968 | 2     | 0.05  | Up   | 1.64  | 0.17      |      | -0.5  | 0.84      |      | 1.31  | 0.28  |      | Expressed protein                                           |
| Pc_TC089969 | 0.49  | 0.37  |      | 0.94  | 0.14      |      | -2.03 | 0.07      |      | -2.19 | 0     | Down | Expressed protein                                           |
| Pc_TC089975 | -2.34 | 0.11  |      | -1.36 | 0.36      |      | -0.33 | 0.86      |      | -3.37 | 0.04  | Down | Expressed protein                                           |
| Pc_TC089976 | 0.75  | 0.11  |      | 2.25  | 1.90E-005 | Up   | 0     | 1.94E-008 |      | -3.34 | ##### | Down | Expressed protein                                           |
| Pc_TC089979 | -0.73 | 0.76  |      | -0.75 | 0.78      |      | 2.87  | 0.04      | Up   | 0.91  | 0.54  |      | Expressed protein                                           |
| Pc_TC089990 | 0.61  | 0.2   |      | 0.7   | 0.22      |      | -3.02 | 0.01      | Down | -0.69 | 0.3   |      | Expressed protein                                           |
| Pc_TC089992 | 0.02  | 0.98  |      | -0.78 | 0.24      |      | 1.92  | 0.05      | Up   | 0.07  | 0.93  |      | NB-ARC domain-containing disease resistance protein         |
| Pc_TC090008 | 2.47  | 0     | Up   | 0     | 0         |      | 0.8   | 0.51      |      | -0.22 | 0.84  |      | plant glycogenin-like starch initiation protein 5           |
| Pc_TC090021 | -0.57 | 0.32  |      | -1.73 | 0.02      | Down | 0.14  | 0.9       |      | -0.42 | 0.55  |      | Expressed protein                                           |
| Pc_TC090038 | 0.45  | 0.69  |      | 2.22  | 0.02      | Up   | -3.58 | 0.07      |      | -1.46 | 0.27  |      | Ribosomal protein L4/L1 family                              |
| Pc_TC090043 | -0.52 | 0.43  |      | 0.67  | 0.34      |      | -1.41 | 0.22      |      | -1.63 | 0.05  | Down | Expressed protein                                           |
| Pc_TC090064 | 0.62  | 0.5   |      | 0.18  | 0.9       |      | 2.34  | 0.05      | Up   | 0.78  | 0.43  |      | Expressed protein                                           |
| Pc_TC090088 | -0.13 | 0.91  |      | -0.06 | 0.98      |      | -1.9  | 0.17      |      | -2.41 | 0.03  | Down | Expressed protein                                           |
| Pc_TC090092 | 0.02  | 0.97  |      | 0.45  | 0.43      |      | -3.89 | 0         | Down | -2.1  | 0     | Down | C2 calcium/lipid-binding and GRAM domain containing protein |
| Pc_TC090118 | 0.08  | 0.93  |      | 1.64  | 0.02      | Up   | -3.01 | 0.02      | Down | -0.49 | 0.56  |      | Expressed protein                                           |
| Pc_TC090132 | 1.16  | 0.2   |      | 1.88  | 0.05      | Up   | -0.78 | 0.63      |      | -0.88 | 0.5   |      | Expressed protein                                           |
| Pc_TC090133 | 0.42  | 0.47  |      | 0.3   | 0.67      |      | -3.23 | 0.01      | Down | -2.49 | 0     | Down | Expressed protein                                           |
| Pc_TC090143 | 1.22  | 0.27  |      | 2.54  | 0.01      | Up   | 1.18  | 0.44      |      | 1.16  | 0.33  |      | Putative uncharacterized protein B1097D05.32                |
| Pc_TC090163 | 0.58  | 0.52  |      | 0.56  | 0.59      |      | 2.15  | 0.07      |      | 1.81  | 0.04  | Up   | Glycosyl hydrolase family 38 protein                        |
| Pc_TC090165 | 0.68  | 0.19  |      | 1.45  | 0.02      | Up   | -3.24 | 0.01      | Down | 0.1   | 0.89  |      | Expressed protein                                           |
| Pc_TC090170 | 0     | 1     |      | 0.56  | 0.49      |      | -2.11 | 0.1       |      | -2.23 | 0.02  | Down | Expressed protein                                           |
| Pc_TC090180 | -3.73 | 0.05  | Down | -0.43 | 0.8       |      | -1.13 | 0.51      |      | -0.6  | 0.68  |      | Expressed protein                                           |
| Pc_TC090190 | 0.95  | 0.15  |      | 1.97  | 0.01      | Up   | -2.18 | 0.09      |      | -0.59 | 0.5   |      | Major facilitator superfamily protein                       |
| Pc_TC090191 | 0.74  | 0.15  |      | 2.36  | 2.88E-005 | Up   | -1.24 | 0.24      |      | 0.5   | 0.45  |      | Major facilitator superfamily protein                       |
| Pc_TC090197 | 2.05  | ##### | Up   | 0     | 1.42E-011 |      | 1.48  | 0.13      |      | -0.05 | 0.95  |      | Ribosomal protein L30/L7 family protein                     |
| Pc_TC090216 | -0.35 | 0.62  |      | -0.24 | 0.78      |      | 1.76  | 0.1       |      | 1.59  | 0.02  | Up   | Uncharacterized protein                                     |
| Pc_TC090237 | -0.73 | 0.47  |      | -1.75 | 0.15      |      | -4.3  | 0.02      | Down | 0     | 0     |      | Expressed protein                                           |
| Pc_TC090242 | -1.41 | 0.12  |      | -3.33 | 0.01      | Down | 0.52  | 0.67      |      | -0.09 | 0.94  |      | Expressed protein                                           |
| Pc_TC090249 | -0.24 | 0.71  |      | 0.1   | 0.91      |      | -3.28 | 0.01      | Down | -3.35 | 0     | Down | Expressed protein                                           |
| Pc_TC090250 | 2.07  | 0     | Up   | 0     | 0         |      | 1.35  | 0.25      |      | -0.13 | 0.93  |      | rotamase CYP 1                                              |
| Pc_TC090270 | -0.92 | 0.17  |      | 0.36  | 0.62      |      | -0.51 | 0.65      |      | -2.08 | 0.01  | Down | Expressed protein                                           |
| Pc_TC090272 | -1.09 | 0.24  |      | -2.3  | 0.05      | Down | 2.49  | 0.03      | Up   | 0.31  | 0.74  |      | Expressed protein                                           |
| Pc_TC090291 | -0.85 | 0.48  |      | 0.27  | 0.85      |      | -1.94 | 0.23      |      | -3.62 | 0.02  | Down | Expressed protein                                           |
| Pc_TC090295 | 0.89  | 0.68  |      | 2.76  | 0.04      | Up   | -0.5  | 0.95      |      | 1.53  | 0.35  |      | Expressed protein                                           |
| Pc_TC090302 | 1.05  | 0.05  | Up   | 1.1   | 0.08      |      | -2.71 | 0.02      | Down | -0.89 | 0.22  |      | Expressed protein                                           |
| Pc_TC090303 | 1.37  | 0.02  | Up   | 0.32  | 0.68      |      | -1.05 | 0.37      |      | 1.28  | 0.07  |      | Expressed protein                                           |
| Pc_TC090306 | -0.4  | 0.65  |      | 0.06  | 0.98      |      | -2.2  | 0.11      |      | -3.08 | 0.01  | Down | Expressed protein                                           |
| Pc_TC090321 | 0.66  | 0.13  |      | 0.54  | 0.32      |      | -2.34 | 0.02      | Down | -0.4  | 0.52  |      | Expressed protein                                           |
| Pc_TC090329 | -0.92 | 0.15  |      | -1.61 | 0.04      | Down | 0.69  | 0.51      |      | 0.31  | 0.66  |      | Expressed protein                                           |

|             |       |       |      |       |           |      |       |           |      |        |       |      |                                                               |
|-------------|-------|-------|------|-------|-----------|------|-------|-----------|------|--------|-------|------|---------------------------------------------------------------|
| Pc_TC090334 | -1.61 | 0.08  |      | -2.16 | 0.05      | Down | 1.8   | 0.11      |      | 0.07   | 0.97  |      | Expressed protein                                             |
| Pc_TC090335 | 0.44  | 0.51  |      | 0.06  | 0.96      |      | 1.43  | 0.18      |      | 1.65   | 0.02  | Up   | Expressed protein                                             |
| Pc_TC090341 | 0.48  | 0.36  |      | 1.1   | 0.07      |      | -3.14 | 0.01      | Down | -1.67  | 0.02  | Down | Expressed protein                                             |
| Pc_TC090342 | 2.74  | 0.05  | Up   | 2.28  | 0.17      |      | -0.5  | 0.99      |      | 0      | 0.35  |      | Expressed protein                                             |
| Pc_TC090344 | 2.35  | ##### | Up   | 0     | 6.24E-007 |      | 1.88  | 0.07      |      | 0.58   | 0.44  |      | tubulin alpha-5                                               |
| Pc_TC090351 | 0.55  | 0.07  |      | -0.5  | 0.21      |      | 0.96  | 0.25      |      | 1.87   | 0     | Up   | Expressed protein                                             |
| Pc_TC090357 | 3.08  | 0.18  |      | 4.06  | 0.04      | Up   | 1.5   | 0.78      |      | 1.63   | 0.71  |      | Expressed protein                                             |
| Pc_TC090360 | -2.73 | 0.1   |      | 0     | 0.02      |      | -0.22 | 0.93      |      | -4.18  | 0.03  | Down | Expressed protein                                             |
| Pc_TC090379 | -0.78 | 0.15  |      | -1.28 | 0.06      |      | 2.54  | 0.01      | Up   | 1.36   | 0.03  | Up   | Expressed protein                                             |
| Pc_TC090391 | -1.06 | 0.17  |      | 0.12  | 0.9       |      | 3.18  | 0         | Up   | 1.59   | 0.03  | Up   | sulfotransferase 4B                                           |
| Pc_TC090393 | 1.4   | 0.01  | Up   | -0.73 | 0.36      |      | 0.66  | 0.54      |      | 1.09   | 0.13  |      | Expressed protein                                             |
| Pc_TC090409 | -8.74 | ##### | Down | 0     | 1.55E-028 |      | -7.58 | 9.50E-010 | Down | -10.78 | ##### | Down | myosin 1                                                      |
| Pc_TC090414 | -0.27 | 0.7   |      | -3.25 | 0         | Down | -2.02 | 0.09      |      | -1.64  | 0.05  | Down | Expressed protein                                             |
| Pc_TC090440 | -0.73 | 0.37  |      | -0.6  | 0.52      |      | -2.94 | 0.03      | Down | -1.53  | 0.11  |      | Expressed protein                                             |
| Pc_TC090444 | 0.34  | 0.6   |      | 1.74  | 0.01      | Up   | -2.22 | 0.07      |      | -1.19  | 0.15  |      | Expressed protein                                             |
| Pc_TC090450 | -0.01 | 0.99  |      | -1.43 | 0.02      | Down | 0.67  | 0.48      |      | 0.51   | 0.4   |      | Putative uncharacterized protein                              |
| Pc_TC090451 | 1.76  | 0.05  | Up   | -0.05 | 1         |      | 2.55  | 0.04      | Up   | 2.21   | 0.02  | Up   | Expressed protein                                             |
| Pc_TC090456 | 1.25  | 0.02  | Up   | 0     | 1.01E-008 |      | 2.04  | 0.04      | Up   | -0.21  | 0.78  |      | Expressed protein                                             |
| Pc_TC090462 | -0.53 | 0.28  |      | -1.61 | 0.01      | Down | 1.48  | 0.11      |      | 0.94   | 0.11  |      | Expressed protein                                             |
| Pc_TC090468 | 0.55  | 0.34  |      | 0.94  | 0.16      |      | -1.56 | 0.17      |      | -1.79  | 0.02  | Down | Expressed protein                                             |
| Pc_TC090472 | -0.02 | 1     |      | -0.38 | 0.65      |      | 0     | 3.93E-005 |      | -4.56  | ##### | Down | Expressed protein                                             |
| Pc_TC090481 | 1.75  | 0     | Up   | 0     | 3.60E-008 |      | 1.79  | 0.08      |      | 0.11   | 0.89  |      | saposin B domain-containing protein                           |
| Pc_TC090496 | 1.82  | ##### | Up   | 0     | 7.97E-016 |      | 2.11  | 0.02      | Up   | -0.01  | 0.98  |      | heat shock protein 70B                                        |
| Pc_TC090506 | -0.43 | 0.68  |      | 0.39  | 0.71      |      | -3.25 | 0.05      | Down | -0.49  | 0.66  |      | Expressed protein                                             |
| Pc_TC090507 | -2.24 | 0.23  |      | -0.09 | 1         |      | 3.04  | 0.02      | Up   | 1.21   | 0.31  |      | Expressed protein                                             |
| Pc_TC090511 | -0.01 | 0.99  |      | 1.26  | 0.03      | Up   | -1.44 | 0.17      |      | -0.52  | 0.45  |      | Expressed protein                                             |
| Pc_TC090514 | 2.12  | 0     | Up   | 0     | 0         |      | 1.65  | 0.17      |      | 0.66   | 0.51  |      | Expressed protein                                             |
| Pc_TC090522 | 2.66  | 0.02  | Up   | -1.26 | 0.7       |      | 1.5   | 0.4       |      | 2.21   | 0.09  |      | Expressed protein                                             |
| Pc_TC090523 | -1.51 | 0.16  |      | -3.7  | 0.01      | Down | 0.92  | 0.46      |      | 1.19   | 0.18  |      | Expressed protein                                             |
| Pc_TC090524 | -0.84 | 0.31  |      | -1.86 | 0.07      |      | -3.11 | 0.03      | Down | -0.32  | 0.73  |      | Expressed protein                                             |
| Pc_TC090542 | -0.16 | 0.84  |      | 1.36  | 0.05      |      | 0     | 2.53E-005 |      | -3.37  | 0     | Down | Expressed protein                                             |
| Pc_TC090551 | 2.37  | 0     | Up   | 0     | 0.01      |      | 1.92  | 0.12      |      | 0.54   | 0.63  |      | vacuolar proton ATPase A2                                     |
| Pc_TC090584 | 2.13  | 0.01  | Up   | 1.97  | 0.05      |      | 1.2   | 0.4       |      | 2.11   | 0.03  | Up   | Pentatricopeptide repeat (PPR) superfamily protein            |
| Pc_TC090589 | -0.16 | 0.71  |      | -1.6  | 0.01      | Down | 1.47  | 0.1       |      | 2.09   | 0     | Up   | Expressed protein                                             |
| Pc_TC090597 | 1.77  | 0     | Up   | 0     | 1.41E-007 |      | 1.71  | 0.1       |      | 0.03   | 0.98  |      | basic transcription factor 3                                  |
| Pc_TC090618 | -2.86 | 0.03  | Down | -0.77 | 0.53      |      | -3.02 | 0.07      |      | 0      | 0     |      | Expressed protein                                             |
| Pc_TC090647 | 0     | 1     |      | 0.66  | 0.46      |      | -4.71 | 0.01      | Down | -1.06  | 0.29  |      | Expressed protein                                             |
| Pc_TC090660 | 1.95  | 0.05  |      | 2.5   | 0.02      | Up   | 0.92  | 0.58      |      | 1.36   | 0.26  |      | Expressed protein                                             |
| Pc_TC090667 | -2.9  | 0     | Down | -2.72 | 0.01      | Down | -0.13 | 0.93      |      | -1.35  | 0.14  |      | Protein kinase family protein with leucine-rich repeat domain |
| Pc_TC090711 | 0.87  | 0.17  |      | 0.25  | 0.76      |      | -2.58 | 0.04      | Down | -0.26  | 0.76  |      | Major facilitator superfamily protein                         |
| Pc_TC090712 | -2.35 | 0.04  | Down | 1     | 0.28      |      | -5.25 | 0.01      | Down | -2.81  | 0.03  | Down | Expressed protein                                             |
| Pc_TC090714 | 0.13  | 0.79  |      | 0.44  | 0.44      |      | -2.31 | 0.03      | Down | -1.15  | 0.08  |      | Expressed protein                                             |
| Pc_TC090727 | 1.29  | 0.04  | Up   | 2.06  | 0         | Up   | -0.77 | 0.52      |      | 0.44   | 0.59  |      | Expressed protein                                             |
| Pc_TC090738 | 1.86  | 0     | Up   | 0     | 6.39E-008 |      | 1.49  | 0.15      |      | -0.27  | 0.73  |      | Ribosomal L28e protein family                                 |
| Pc_TC090766 | 0.33  | 0.52  |      | 0.53  | 0.39      |      | -3.48 | 0         | Down | -1.32  | 0.06  |      | Expressed protein                                             |
| Pc_TC090772 | 0.2   | 0.84  |      | 0.33  | 0.74      |      | -3.26 | 0.03      | Down | -0.82  | 0.42  |      | Expressed protein                                             |
| Pc_TC090778 | 0.7   | 0.27  |      | 1.01  | 0.16      |      | -3.82 | 0         | Down | -0.94  | 0.25  |      | Expressed protein                                             |
| Pc_TC090806 | 0.92  | 0.22  |      | 0.56  | 0.55      |      | -4    | 0.02      | Down | -0.6   | 0.55  |      | Expressed protein                                             |
| Pc_TC090816 | 0.79  | 0.05  |      | 1.12  | 0.03      | Up   | -1.08 | 0.26      |      | 0.01   | 0.99  |      | Expressed protein                                             |
| Pc_TC090836 | 0.44  | 0.39  |      | 0.74  | 0.21      |      | -5.27 | 4.40E-005 | Down | -1.59  | 0.02  | Down | Expressed protein                                             |
| Pc_TC090853 | 1.34  | 0.05  | Up   | 0.59  | 0.49      |      | 2.13  | 0.05      |      | 1.35   | 0.09  |      | Expressed protein                                             |
| Pc_TC090886 | -1.79 | 0.02  | Down | -2.13 | 0.02      | Down | -1.61 | 0.17      |      | -0.84  | 0.29  |      | Expressed protein                                             |
| Pc_TC090887 | -1.96 | 0.04  | Down | -2.13 | 0.05      |      | 1.56  | 0.17      |      | 0.59   | 0.49  |      | Uncharacterized protein                                       |
| Pc_TC090888 | -1.27 | 0.03  | Down | -1.64 | 0.02      | Down | 0.48  | 0.63      |      | -1.11  | 0.12  |      | Uncharacterized protein                                       |
| Pc_TC090920 | 0.06  | 0.96  |      | 0.72  | 0.35      |      | -3.64 | 0.01      | Down | -2.16  | 0.02  | Down | putative unclassified                                         |
| Pc_TC090923 | 0.32  | 0.58  |      | 0.93  | 0.14      |      | -5.79 | 4.47E-005 | Down | -1.54  | 0.04  | Down | Expressed protein                                             |
| Pc_TC090940 | 0.15  | 0.84  |      | 0.64  | 0.38      |      | -2.72 | 0.03      | Down | -0.99  | 0.23  |      | Expressed protein                                             |
| Pc_TC090942 | -0.22 | 0.82  |      | 0.49  | 0.59      |      | -4.71 | 0.01      | Down | -2.26  | 0.04  | Down | Expressed protein                                             |
| Pc_TC090956 | -1.46 | 0.04  | Down | -0.3  | 0.7       |      | -0.32 | 0.78      |      | -0.12  | 0.88  |      | Expressed protein                                             |
| Pc_TC090986 | 0.31  | 0.69  |      | 1.16  | 0.14      |      | -2.85 | 0.04      | Down | -1.2   | 0.2   |      | Predicted protein                                             |
| Pc_TC090992 | 2.15  | 0.02  | Up   | 0     | 0.07      |      | 1.43  | 0.33      |      | -0.11  | 1     |      | Small nuclear ribonucleoprotein family protein                |
| Pc_TC090995 | 0.35  | 0.56  |      | 0.42  | 0.55      |      | -4.56 | 0         | Down | -2.6   | 0     | Down | Expressed protein                                             |

|             |       |       |      |       |           |      |       |           |      |       |       |      |                                                                            |
|-------------|-------|-------|------|-------|-----------|------|-------|-----------|------|-------|-------|------|----------------------------------------------------------------------------|
| Pc_TC091004 | 0.06  | 0.92  |      | 1.38  | 0.02      | Up   | -4.09 | 0         | Down | -2.48 | 0     | Down | Expressed protein                                                          |
| Pc_TC091005 | 0.08  | 1     |      | 0.64  | 0.98      |      | 4.09  | 0.02      | Up   | 2.53  | 0.16  |      | Uncharacterized protein                                                    |
| Pc_TC091021 | -0.75 | 0.14  |      | -0.3  | 0.62      |      | 2.33  | 0.01      | Up   | 1.08  | 0.07  |      | Expressed protein                                                          |
| Pc_TC091027 | 0.43  | 0.54  |      | 0.63  | 0.42      |      | -3.64 | 0.01      | Down | -2.42 | 0.01  | Down | Expressed protein                                                          |
| Pc_TC091032 | 0.08  | 0.9   |      | -0.67 | 0.34      |      | 1.77  | 0.08      |      | 1.38  | 0.03  | Up   | Plastid-lipid associated protein PAP / fibrillin family protein            |
| Pc_TC091036 | 0.48  | 0.24  |      | 1.16  | 0.02      | Up   | -1.95 | 0.05      | Down | -0.6  | 0.31  |      | Expressed protein                                                          |
| Pc_TC091065 | -0.99 | 0.39  |      | -0.63 | 0.62      |      | -3.3  | 0.06      |      | -3.18 | 0.03  | Down | Expressed protein                                                          |
| Pc_TC091077 | 2.39  | ##### | Up   | 0     | 9.80E-007 |      | 2.1   | 0.05      | Up   | 1.07  | 0.14  |      | neurochondrin family protein                                               |
| Pc_TC091085 | 0.52  | 0.25  |      | 0.48  | 0.39      |      | -0.68 | 0.49      |      | 1.27  | 0.03  | Up   | Expressed protein                                                          |
| Pc_TC091090 | 3.89  | 0     | Up   | 2.47  | 0.12      |      | 2.44  | 0.19      |      | 2.8   | 0.05  |      | unknown protein                                                            |
| Pc_TC091092 | -0.74 | 0.41  |      | -2.57 | 0.03      | Down | -1.12 | 0.4       |      | -0.73 | 0.46  |      | unknown protein                                                            |
| Pc_TC091095 | -0.08 | 0.9   |      | 0.49  | 0.44      |      | -2.17 | 0.05      | Down | -1.97 | 0.01  | Down | Expressed protein                                                          |
| Pc_TC091105 | -3.92 | 0.03  | Down | -2.36 | 0.15      |      | 0     | 0.01      |      | -2.79 | 0.07  |      | Expressed protein                                                          |
| Pc_TC091109 | -1.48 | 0.07  |      | -1.58 | 0.09      |      | -2.79 | 0.04      | Down | -2.94 | 0     | Down | Putative uncharacterized protein                                           |
| Pc_TC091112 | 0.4   | 0.31  |      | 0.59  | 0.23      |      | -2.47 | 0.01      | Down | -1.73 | 0     | Down | Expressed protein                                                          |
| Pc_TC091137 | -2.72 | ##### | Down | -1.53 | 0.02      | Down | -2.56 | 0.02      | Down | -3.17 | ##### | Down | Expressed protein                                                          |
| Pc_TC091140 | 2.03  | 0     | Up   | 2.05  | 0.01      | Up   | -0.38 | 0.77      |      | -1.5  | 0.14  |      | Expressed protein                                                          |
| Pc_TC091152 | 0.07  | 0.9   |      | -0.22 | 0.73      |      | -3.17 | 0.01      | Down | -2.82 | 0     | Down | Expressed protein                                                          |
| Pc_TC091164 | 0.47  | 0.24  |      | 0.94  | 0.05      |      | -2.14 | 0.03      | Down | -0.8  | 0.18  |      | Expressed protein                                                          |
| Pc_TC091170 | -0.42 | 0.52  |      | -0.17 | 0.83      |      | -3.26 | 0.01      | Down | -2.8  | 0     | Down | Chitin elicitor receptor kinase 1                                          |
| Pc_TC091182 | -2.62 | 0.03  | Down | 0     | 0         |      | -0.2  | 0.91      |      | 0.54  | 0.58  |      | Expressed protein                                                          |
| Pc_TC091186 | -1.82 | 0.03  | Down | -3.16 | 0         | Down | -1.98 | 0.12      |      | -0.25 | 0.78  |      | Expressed protein                                                          |
| Pc_TC091187 | -0.67 | 0.35  |      | -2.15 | 0.02      | Down | 1.71  | 0.11      |      | 0.49  | 0.52  |      | Expressed protein                                                          |
| Pc_TC091191 | -0.56 | 0.48  |      | 0.54  | 0.51      |      | -2.42 | 0.07      |      | -2.2  | 0.02  | Down | Expressed protein                                                          |
| Pc_TC091192 | -0.15 | 0.8   |      | 0.54  | 0.41      |      | -1.57 | 0.15      |      | -1.55 | 0.04  | Down | Expressed protein                                                          |
| Pc_TC091201 | 0.66  | 0.3   |      | 1.38  | 0.05      | Up   | -1.97 | 0.1       |      | -0.55 | 0.5   |      | Expressed protein                                                          |
| Pc_TC091202 | 0.74  | 0.11  |      | 0.71  | 0.21      |      | -2.98 | 0.01      | Down | -0.7  | 0.28  |      | Expressed protein                                                          |
| Pc_TC091208 | 0.86  | 0.17  |      | 0.7   | 0.36      |      | -2.58 | 0.04      | Down | -0.14 | 0.88  |      | Expressed protein                                                          |
| Pc_TC091209 | 2.29  | 0.02  | Up   | 3.43  | 0         | Up   | 0.59  | 0.77      |      | 3.02  | 0     | Up   | Expressed protein                                                          |
| Pc_TC091210 | -0.33 | 0.58  |      | -1.69 | 0.03      | Down | 0.16  | 0.88      |      | 0.22  | 0.76  |      | Expressed protein                                                          |
| Pc_TC091211 | 0.21  | 0.63  |      | 0.17  | 0.75      |      | -2.29 | 0.02      | Down | -0.74 | 0.23  |      | Expressed protein                                                          |
| Pc_TC091231 | 3.54  | 0     | Up   | 0     | 0.48      |      | 6.35  | 8.52E-006 | Up   | 2.43  | 0.11  |      | Uncharacterized protein                                                    |
| Pc_TC091232 | 1.73  | 0     | Up   | 0     | 6.98E-007 |      | 1.7   | 0.11      |      | -0.34 | 0.68  |      | Expressed protein                                                          |
| Pc_TC091237 | 1.12  | 0.09  |      | 0.8   | 0.31      |      | -4.03 | 0.01      | Down | -0.84 | 0.34  |      | Expressed protein                                                          |
| Pc_TC091245 | -1.81 | 0.11  |      | 0     | 0         |      | -0.95 | 0.51      |      | -3.49 | 0.01  | Down | Expressed protein                                                          |
| Pc_TC091267 | 0.52  | 0.33  |      | 0.6   | 0.35      |      | -3.72 | 0         | Down | -2.45 | 0     | Down | Expressed protein                                                          |
| Pc_TC091268 | 1.36  | 0.04  | Up   | 0.51  | 0.54      |      | -1.92 | 0.14      |      | 0.16  | 0.87  |      | Expressed protein                                                          |
| Pc_TC091269 | 0.5   | 0.28  |      | 1.07  | 0.05      | Up   | -2.5  | 0.02      | Down | -0.94 | 0.15  |      | Expressed protein                                                          |
| Pc_TC091270 | -0.74 | 0.25  |      | -1.85 | 0.02      | Down | -0.7  | 0.52      |      | 0.25  | 0.73  |      | RNA-directed DNA polymerase (reverse transcriptase)-related family protein |
| Pc_TC091271 | -1.09 | 0.24  |      | -0.86 | 0.41      |      | -2.86 | 0.05      |      | -2.22 | 0.04  | Down | Expressed protein                                                          |
| Pc_TC091275 | -0.41 | 0.66  |      | 0.21  | 0.84      |      | -5.63 | 0         | Down | -3.5  | 0     | Down | Expressed protein                                                          |
| Pc_TC091312 | -0.06 | 0.94  |      | -1.4  | 0.08      |      | 2.23  | 0.03      | Up   | 0.82  | 0.24  |      | Expressed protein                                                          |
| Pc_TC091316 | -0.53 | 0.57  |      | -0.16 | 0.9       |      | 0     | 0         |      | -5.5  | 0     | Down | Expressed protein                                                          |
| Pc_TC091317 | -0.56 | 0.58  |      | 1.03  | 0.26      |      | 0     | 0         |      | -2.6  | 0.03  | Down | Expressed protein                                                          |
| Pc_TC091321 | -0.86 | 0.41  |      | -1.13 | 0.35      |      | -1.68 | 0.26      |      | -3.02 | 0.02  | Down | cytochrome P450, family 72, subfamily A, polypeptide 7                     |
| Pc_TC091326 | 1.41  | 0.08  |      | 1.22  | 0.2       |      | -2.57 | 0.12      |      | -3.77 | 0.01  | Down | Expressed protein                                                          |
| Pc_TC091333 | -1.22 | 0.14  |      | 1.5   | 0.04      | Up   | -0.79 | 0.52      |      | -0.2  | 0.83  |      | Expressed protein                                                          |
| Pc_TC091336 | 0.18  | 0.81  |      | 0     | 1         |      | -4.34 | 0         | Down | -1.46 | 0.09  |      | Expressed protein                                                          |
| Pc_TC091337 | -0.45 | 0.51  |      | -0.23 | 0.78      |      | 2.21  | 0.03      | Up   | 1.27  | 0.07  |      | Expressed protein                                                          |
| Pc_TC091338 | 0.3   | 0.55  |      | -1.48 | 0.03      | Down | -0.2  | 0.84      |      | 0.1   | 0.88  |      | Expressed protein                                                          |
| Pc_TC091341 | 0.66  | 0.53  |      | 2.66  | 0         | Up   | -0.33 | 0.86      |      | 2.1   | 0.02  | Up   | ATP synthase lipid-binding protein, mitochondrial                          |
| Pc_TC091342 | 1.98  | ##### | Up   | 0     | 2.07E-013 |      | 1.5   | 0.11      |      | 0.79  | 0.2   |      | Expressed protein                                                          |
| Pc_TC091359 | 0.21  | 0.65  |      | 0.82  | 0.14      |      | -3.1  | 0         | Down | -0.86 | 0.19  |      | rRNA N-glycosidase                                                         |
| Pc_TC091363 | 2.78  | 0.1   |      | 1.64  | 0.53      |      | 4.18  | 0.02      | Up   | 3.38  | 0.03  | Up   | Adaptor protein complex AP-2, alpha subunit                                |
| Pc_TC091365 | -0.97 | 0.13  |      | -1.79 | 0.03      | Down | 0.2   | 0.86      |      | -0.19 | 0.81  |      | Adaptor protein complex AP-2, alpha subunit                                |
| Pc_TC091370 | -0.23 | 0.87  |      | -0.87 | 0.49      |      | 2.5   | 0.04      | Up   | 0.93  | 0.34  |      | cysteine-rich RLK (RECEPTOR-like protein kinase) 8                         |
| Pc_TC091374 | -1.63 | 0.09  |      | -2.11 | 0.06      |      | -2.67 | 0.07      |      | -4.54 | 0     | Down | Expressed protein                                                          |
| Pc_TC091379 | 0.5   | 0.46  |      | 1.85  | 0.01      | Up   | -1.59 | 0.19      |      | -0.44 | 0.6   |      | Expressed protein                                                          |
| Pc_TC091380 | 3.78  | 0.05  | Up   | 3.64  | 0.09      |      | 1.09  | 0.94      |      | 2.43  | 0.39  |      | Expressed protein                                                          |
| Pc_TC091399 | 0.49  | 0.55  |      | 0.44  | 0.65      |      | -2.37 | 0.1       |      | -2.25 | 0.05  | Down | Expressed protein                                                          |
| Pc_TC091401 | 0.49  | 0.14  |      | 0.54  | 0.2       |      | -2.17 | 0.02      | Down | -1.03 | 0.05  |      | Expressed protein                                                          |
| Pc_TC091402 | 0.76  | 0.27  |      | -0.26 | 0.79      |      | -3.58 | 0.01      | Down | -0.65 | 0.47  |      | Uncharacterized protein                                                    |

|             |       |      |      |       |           |      |       |           |      |       |       |      |                                                                            |         |
|-------------|-------|------|------|-------|-----------|------|-------|-----------|------|-------|-------|------|----------------------------------------------------------------------------|---------|
| Pc_TC091403 | -1.92 | 0.36 |      | 0.06  | 1         |      | 3.59  | 0.01      | Up   | 0.43  | 0.82  |      | RNA-directed DNA polymerase (reverse transcriptase)-related family protein |         |
| Pc_TC091410 | 0.12  | 0.88 |      | 0.89  | 0.25      |      | -3.45 | 0.01      | Down | -1.52 | 0.09  |      | Expressed protein                                                          |         |
| Pc_TC091413 | 1.72  | 0.04 | Up   | 1.43  | 0.15      |      | -0.06 | 1         |      | -0.65 | 0.62  |      | Putative uncharacterized protein                                           |         |
| Pc_TC091423 | 0.14  | 0.79 |      | 0.52  | 0.39      |      | -1.77 | 0.1       |      | -1.52 | 0.03  | Down | gag protein                                                                |         |
| Pc_TC091438 | -2.33 | 0    | Down | -2.03 | 0.02      | Down | 0.72  | 0.51      |      | 0.1   | 0.91  |      | Expressed protein                                                          |         |
| Pc_TC091463 | 2.05  | 0    | Up   | 0     | 2.30E-005 |      | 1.9   | 0.08      |      | 0.11  | 0.92  |      | Expressed protein                                                          |         |
| Pc_TC091468 | -0.9  | 0.14 |      | -2.08 | 0.01      | Down | 1.34  | 0.18      |      | 0.41  | 0.55  |      | Expressed protein                                                          | AUX/IAA |
| Pc_TC091509 | -0.47 | 0.49 |      | 1     | 0.15      |      | -1.2  | 0.3       |      | -2.08 | 0.02  | Down | Ribosomal protein L6 family                                                |         |
| Pc_TC091522 | 2.82  | 0.04 | Up   | 2.28  | 0.17      |      | 2.09  | 0.29      |      | 1.85  | 0.29  |      | Uncharacterized protein                                                    |         |
| Pc_TC091534 | -1.95 | 0.03 | Down | -1.53 | 0.13      |      | -3.99 | 0.01      | Down | -1.06 | 0.26  |      | Uncharacterized protein                                                    |         |
| Pc_TC091549 | -3.38 | 0.02 | Down | -0.94 | 0.45      |      | -0.5  | 0.75      |      | -0.25 | 0.85  |      | Uncharacterized protein                                                    |         |
| Pc_TC091566 | -2.18 | 0.02 | Down | -0.61 | 0.53      |      | 0.95  | 0.41      |      | 0.83  | 0.32  |      | P-loop containing nucleoside triphosphate hydrolases superfamily protein   |         |
| Pc_TC091580 | -1.45 | 0    | Down | -0.42 | 0.37      |      | -0.55 | 0.53      |      | -0.77 | 0.15  |      | Expressed protein                                                          |         |
| Pc_TC091584 | 0.38  | 0.59 |      | 1.02  | 0.17      |      | -1.23 | 0.31      |      | -2.4  | 0.01  | Down | Expressed protein                                                          |         |
| Pc_TC091623 | -0.8  | 0.35 |      | 1.07  | 0.18      |      | -5.96 | 0         | Down | -1.31 | 0.17  |      | alpha-N-acetylglucosaminidase family / NAGLU family                        |         |
| Pc_TC091639 | 0.82  | 0.63 |      | 0.64  | 0.76      |      | 1.78  | 0.27      |      | 3.13  | 0     | Up   | Expressed protein                                                          |         |
| Pc_TC091659 | -0.55 | 0.34 |      | -1.06 | 0.13      |      | 2.07  | 0.03      | Up   | 1.13  | 0.08  |      | Expressed protein                                                          |         |
| Pc_TC091676 | -1.62 | 0.14 |      | 0     | 0         |      | -1.2  | 0.4       |      | -2.49 | 0.04  | Down | Expressed protein                                                          |         |
| Pc_TC091694 | 2.05  | 0.02 | Up   | 0     | 0.02      |      | 1.55  | 0.25      |      | -2.18 | 0.15  |      | Expressed protein                                                          |         |
| Pc_TC091700 | 0     | 1    |      | -0.26 | 0.8       |      | 2.35  | 0.04      | Up   | 0.64  | 0.46  |      | Expressed protein                                                          |         |
| Pc_TC091701 | -0.71 | 0.4  |      | -2.11 | 0.05      | Down | 0.26  | 0.84      |      | -0.14 | 0.9   |      | Expressed protein                                                          |         |
| Pc_TC091705 | 0.37  | 0.57 |      | -0.57 | 0.49      |      | -3.63 | 0.01      | Down | -3.87 | 0     | Down | Expressed protein                                                          |         |
| Pc_TC091714 | 0.58  | 0.41 |      | 1.12  | 0.15      |      | -3.22 | 0.02      | Down | -0.89 | 0.32  |      | Expressed protein                                                          |         |
| Pc_TC091723 | 0.54  | 0.07 |      | 0.84  | 0.03      |      | -1.85 | 0.03      | Down | -0.53 | 0.28  |      | Expressed protein                                                          |         |
| Pc_TC091729 | -1.84 | 0.01 | Down | -3.67 | 0         | Down | -2.32 | 0.05      |      | -3.1  | 0     | Down | cytochrome oxidase 2                                                       |         |
| Pc_TC091731 | 1.86  | 0.01 | Up   | 0.12  | 0.95      |      | 0.34  | 0.82      |      | 1.39  | 0.12  |      | calmodulin binding;purine nucleotide binding                               |         |
| Pc_TC091734 | 0.67  | 0.3  |      | 1.43  | 0.05      | Up   | -0.02 | 1         |      | 0.04  | 0.98  |      | calmodulin binding;purine nucleotide binding                               |         |
| Pc_TC091735 | -0.61 | 0.16 |      | -1.19 | 0.03      | Down | 0.09  | 0.92      |      | 0.04  | 0.94  |      | calmodulin binding;purine nucleotide binding                               |         |
| Pc_TC091736 | 0.4   | 0.78 |      | 0.8   | 0.53      |      | 2.98  | 0.02      | Up   | 0.43  | 0.76  |      | Expressed protein                                                          |         |
| Pc_TC091738 | 0.58  | 0.19 |      | 0.63  | 0.25      |      | -6.51 | 1.03E-006 | Down | -2.09 | 0     | Down | Expressed protein                                                          |         |
| Pc_TC091741 | -2.51 | 0.03 | Down | 1.11  | 0.21      |      | -1.23 | 0.37      |      | -1.82 | 0.1   |      | Expressed protein                                                          |         |
| Pc_TC091742 | 2.89  | 0.08 |      | 3.45  | 0.03      | Up   | 0.09  | 1         |      | 0     | 0.54  |      | Expressed protein                                                          |         |
| Pc_TC091750 | 0.1   | 0.91 |      | 0.86  | 0.26      |      | -4.13 | 0         | Down | -3.16 | 0     | Down | Expressed protein                                                          |         |
| Pc_TC091751 | 0.18  | 0.77 |      | 1.18  | 0.06      |      | -3.25 | 0.01      | Down | -1.46 | 0.05  |      | Expressed protein                                                          |         |
| Pc_TC091752 | 1.08  | 0.18 |      | 1.82  | 0.03      | Up   | -0.23 | 0.89      |      | -0.93 | 0.4   |      | Expressed protein                                                          |         |
| Pc_TC091766 | -0.51 | 0.47 |      | -1.82 | 0.04      | Down | 0.9   | 0.4       |      | 0.3   | 0.71  |      | Uncharacterized protein                                                    |         |
| Pc_TC091767 | -2.1  | 0    | Down | -1.25 | 0.06      |      | 0.35  | 0.73      |      | -0.04 | 0.96  |      | Uncharacterized protein                                                    |         |
| Pc_TC091774 | 0.31  | 0.59 |      | 0.54  | 0.42      |      | 1.61  | 0.11      |      | 1.37  | 0.04  | Up   | Expressed protein                                                          |         |
| Pc_TC091802 | 0.14  | 0.8  |      | 1.93  | 0         | Up   | -5.42 | 3.25E-005 | Down | -3.49 | ##### | Down | Putative uncharacterized protein OJ1119 D01.24                             |         |
| Pc_TC091806 | -0.77 | 0.53 |      | 0.28  | 0.84      |      | -3.08 | 0.09      |      | -2.96 | 0.05  | Down | Expressed protein                                                          |         |
| Pc_TC091822 | -3.57 | 0.01 | Down | -2.59 | 0.06      |      | 0.53  | 0.69      |      | -0.26 | 0.83  |      | Expressed protein                                                          |         |
| Pc_TC091824 | 3.17  | 0.04 | Up   | 0     | 0.67      |      | 1.96  | 0.42      |      | 2.53  | 0.16  |      | Expressed protein                                                          |         |
| Pc_TC091825 | -0.21 | 0.71 |      | -0.31 | 0.64      |      | -2.59 | 0.02      | Down | -0.94 | 0.18  |      | Expressed protein                                                          |         |
| Pc_TC091829 | 0.18  | 0.77 |      | 0.78  | 0.23      |      | -2.45 | 0.03      | Down | 0.06  | 0.94  |      | Expressed protein                                                          |         |
| Pc_TC091843 | 0.31  | 0.59 |      | 1.5   | 0.02      | Up   | -3.58 | 0         | Down | -1.5  | 0.05  | Down | Expressed protein                                                          |         |
| Pc_TC091847 | -1.4  | 0.07 |      | -2.01 | 0.03      | Down | 1.5   | 0.16      |      | 0.71  | 0.36  |      | Expressed protein                                                          |         |
| Pc_TC091849 | 0.54  | 0.32 |      | -0.07 | 0.93      |      | -2.91 | 0.01      | Down | -0.52 | 0.47  |      | Expressed protein                                                          |         |
| Pc_TC091855 | 0.85  | 0.18 |      | 1.2   | 0.1       |      | -4.67 | 0         | Down | 0.14  | 0.87  |      | Expressed protein                                                          |         |
| Pc_TC091861 | 0.6   | 0.33 |      | 0.62  | 0.39      |      | -3.99 | 0         | Down | -2.41 | 0.01  | Down | Expressed protein                                                          |         |
| Pc_TC091869 | -0.96 | 0.27 |      | -2.13 | 0.05      |      | 2.41  | 0.03      | Up   | 1.05  | 0.2   |      | Expressed protein                                                          |         |
| Pc_TC091883 | 0.53  | 0.21 |      | 1     | 0.05      |      | -4.68 | 5.23E-005 | Down | -3.2  | ##### | Down | Expressed protein                                                          |         |
| Pc_TC091892 | 3.66  | 0.01 | Up   | 3.15  | 0.06      |      | -0.5  | 1         |      | 1.63  | 0.49  |      | Expressed protein                                                          |         |
| Pc_TC091903 | 0.02  | 1    |      | -0.61 | 0.6       |      | -1    | 0.48      |      | -2.54 | 0.04  | Down | Expressed protein                                                          |         |
| Pc_TC091908 | 0.22  | 0.46 |      | 0.3   | 0.42      |      | -3.31 | 0         | Down | -1.76 | 0     | Down | Expressed protein                                                          |         |
| Pc_TC091913 | 0.4   | 0.51 |      | 1.22  | 0.07      |      | -2.68 | 0.03      | Down | -1.56 | 0.05  |      | Expressed protein                                                          |         |
| Pc_TC091925 | 0.66  | 0.47 |      | 2.07  | 0.02      | Up   | 1.19  | 0.35      |      | 1.27  | 0.17  |      | Expressed protein                                                          |         |
| Pc_TC091951 | 0.25  | 0.72 |      | 0.54  | 0.48      |      | -3.17 | 0.02      | Down | -1.22 | 0.15  |      | Expressed protein                                                          |         |
| Pc_TC091958 | 1.04  | 0.17 |      | 1.66  | 0.04      | Up   | -2.12 | 0.13      |      | -1.21 | 0.24  |      | Expressed protein                                                          |         |
| Pc_TC091988 | -1.44 | 0.02 | Down | -0.92 | 0.18      |      | -0.02 | 0.99      |      | -0.61 | 0.38  |      | Expressed protein                                                          |         |
| Pc_TC091994 | 0.3   | 0.61 |      | 0.69  | 0.3       |      | -4.29 | 0         | Down | -2.3  | 0     | Down | Expressed protein                                                          |         |
| Pc_TC091995 | 0.38  | 0.2  |      | 0.58  | 0.13      |      | -4.41 | 3.48E-006 | Down | -1.42 | 0     | Down | Expressed protein                                                          |         |
| Pc_TC091999 | -0.39 | 0.62 |      | 0.43  | 0.6       |      | -3.03 | 0.03      | Down | -2.91 | 0     | Down | Expressed protein                                                          |         |

|             |       |       |      |       |           |      |       |           |      |       |       |      |                                                                          |
|-------------|-------|-------|------|-------|-----------|------|-------|-----------|------|-------|-------|------|--------------------------------------------------------------------------|
| Pc_TC092007 | 0.64  | 0.12  |      | 0.63  | 0.22      |      | -3.88 | 0         | Down | -1.04 | 0.09  |      | Uncharacterized protein                                                  |
| Pc_TC092008 | 1.74  | 0     | Up   | 0     | 1.20E-008 |      | 1.7   | 0.1       |      | -0.28 | 0.71  |      | Uncharacterized protein                                                  |
| Pc_TC092037 | 0.44  | 0.36  |      | 0.88  | 0.13      |      | -3.47 | 0         | Down | -0.59 | 0.37  |      | Expressed protein                                                        |
| Pc_TC092038 | -0.73 | 0.4   |      | -2.16 | 0.05      | Down | 0.75  | 0.52      |      | -0.24 | 0.81  |      | Expressed protein                                                        |
| Pc_TC092048 | -0.09 | 0.86  |      | 0.48  | 0.4       |      | -1.27 | 0.21      |      | -1.43 | 0.03  | Down | Expressed protein                                                        |
| Pc_TC092051 | 2.66  | 0     | Up   | 0     | 0.07      |      | 0.83  | 0.61      |      | 0.39  | 0.82  |      | Expressed protein                                                        |
| Pc_TC092053 | 0.28  | 0.73  |      | 1.86  | 0.01      | Up   | -2.14 | 0.11      |      | -1.76 | 0.07  |      | Expressed protein                                                        |
| Pc_TC092059 | -0.12 | 0.89  |      | 0.5   | 0.53      |      | -2.36 | 0.07      |      | -2.01 | 0.03  | Down | Expressed protein                                                        |
| Pc_TC092061 | 2.4   | 0.4   |      | 4.45  | 0.01      | Up   | 2.09  | 0.56      |      | 3.21  | 0.15  |      | THO complex, subunit 5                                                   |
| Pc_TC092072 | -0.18 | 0.84  |      | -0.28 | 0.78      |      | -4.08 | 0.01      | Down | -2.5  | 0.02  | Down | Expressed protein                                                        |
| Pc_TC092092 | 2.54  | 0.05  | Up   | 0     | 0.36      |      | -0.17 | 1         |      | -0.37 | 0.99  |      | Expressed protein                                                        |
| Pc_TC092100 | -0.31 | 0.84  |      | -1.22 | 0.39      |      | -1.58 | 0.33      |      | -4.46 | 0.01  | Down | Uncharacterized protein                                                  |
| Pc_TC092116 | 0.05  | 0.9   |      | 1.04  | 0.02      | Up   | -1.96 | 0.04      | Down | -1.03 | 0.07  |      | Expressed protein                                                        |
| Pc_TC092117 | 0.45  | 0.4   |      | 1.47  | 0.01      | Up   | -4.38 | 0         | Down | -2.59 | 0     | Down | Expressed protein                                                        |
| Pc_TC092119 | 1.34  | 0.15  |      | 2.42  | 0.01      | Up   | -1.23 | 0.46      |      | 0.24  | 0.88  |      | Expressed protein                                                        |
| Pc_TC092122 | 3.08  | 0.18  |      | 4.52  | 0.01      | Up   | 5.26  | 0.01      | Up   | 3.8   | 0.05  |      | Expressed protein                                                        |
| Pc_TC092126 | 0.5   | 0.38  |      | 0.4   | 0.56      |      | -2.28 | 0.05      | Down | -0.59 | 0.42  |      | Expressed protein                                                        |
| Pc_TC092136 | -0.34 | 1     |      | 1.96  | 0.21      |      | 2.96  | 0.06      |      | 2.91  | 0.02  | Up   | Expressed protein                                                        |
| Pc_TC092140 | 0.79  | 0.46  |      | 2.77  | 0         | Up   | -0.84 | 0.63      |      | 1.52  | 0.13  |      | Expressed protein                                                        |
| Pc_TC092149 | 2.23  | 0.02  | Up   | 2.38  | 0.03      | Up   | 2.5   | 0.07      |      | 1.58  | 0.17  |      | Expressed protein                                                        |
| Pc_TC092152 | -0.06 | 0.97  |      | 1.92  | 0.01      | Up   | -1.96 | 0.14      |      | 0.02  | 1     |      | Expressed protein                                                        |
| Pc_TC092157 | 1.77  | 0.01  | Up   | 0.84  | 0.32      |      | 0.88  | 0.45      |      | 1.31  | 0.1   |      | Expressed protein                                                        |
| Pc_TC092165 | 0.93  | 0.44  |      | 1.2   | 0.34      |      | 0.83  | 0.61      |      | 2.43  | 0.02  | Up   | Expressed protein                                                        |
| Pc_TC092176 | 1.07  | 0.03  | Up   | 1     | 0.09      |      | -0.18 | 0.86      |      | 0.27  | 0.68  |      | Expressed protein                                                        |
| Pc_TC092177 | -0.32 | 0.73  |      | -0.57 | 0.58      |      | -4.71 | 0.01      | Down | -0.63 | 0.52  |      | S-adenosyl-L-methionine-dependent methyltransferases superfamily protein |
| Pc_TC092178 | 0.03  | 0.98  |      | -0.75 | 0.35      |      | -4    | 0         | Down | -0.24 | 0.77  |      | jasmonic acid carboxyl methyltransferase                                 |
| Pc_TC092180 | -1.57 | 0.16  |      | -0.68 | 0.57      |      | -3.14 | 0.06      |      | -4.02 | 0.01  | Down | Expressed protein                                                        |
| Pc_TC092184 | 0.94  | 0.22  |      | 1.78  | 0.03      | Up   | -1.63 | 0.24      |      | 0.14  | 0.91  |      | Expressed protein                                                        |
| Pc_TC092185 | 0.6   | 0.23  |      | 0.59  | 0.34      |      | -2.79 | 0.01      | Down | -0.83 | 0.23  |      | Expressed protein                                                        |
| Pc_TC092213 | -3.73 | 0.05  | Down | -0.29 | 0.89      |      | -1.72 | 0.33      |      | -1.6  | 0.27  |      | Expressed protein                                                        |
| Pc_TC092243 | 0.13  | 0.8   |      | -0.07 | 0.92      |      | -3.92 | 0         | Down | -2.03 | 0     | Down | Expressed protein                                                        |
| Pc_TC092250 | 0.66  | 0.28  |      | -0.32 | 0.69      |      | 1.94  | 0.06      |      | 1.82  | 0.01  | Up   | Uncharacterized protein                                                  |
| Pc_TC092253 | -0.19 | 0.82  |      | 0.8   | 0.3       |      | -0.13 | 0.92      |      | -2.45 | 0.01  | Down | Expressed protein                                                        |
| Pc_TC092257 | 0.86  | 0.26  |      | 1.53  | 0.06      |      | 0     | 0         |      | -3.92 | 0     | Down | Expressed protein                                                        |
| Pc_TC092259 | 0.42  | 0.63  |      | 1.13  | 0.2       |      | -5.4  | 0.01      | Down | -2.7  | 0.03  | Down | alpha/beta-Hydrolases superfamily protein                                |
| Pc_TC092270 | -2.19 | 0.05  | Down | 0.37  | 0.72      |      | -0.5  | 0.72      |      | -0.43 | 0.69  |      | Expressed protein                                                        |
| Pc_TC092275 | -0.19 | 0.75  |      | -1.45 | 0.05      | Down | 1.4   | 0.16      |      | 0.54  | 0.42  |      | Expressed protein                                                        |
| Pc_TC092288 | -1.77 | 0.03  | Down | -1.88 | 0.04      | Down | 1.32  | 0.23      |      | 0.06  | 0.96  |      | Expressed protein                                                        |
| Pc_TC092294 | 0.81  | 0.17  |      | 1.78  | 0.01      | Up   | -2.9  | 0.02      | Down | 0.42  | 0.57  |      | Expressed protein                                                        |
| Pc_TC092305 | 0.55  | 0.54  |      | 1.94  | 0.02      | Up   | 0.05  | 1         |      | 0.92  | 0.32  |      | Expressed protein                                                        |
| Pc_TC092332 | -0.09 | 0.97  |      | -1.24 | 0.29      |      | 3.45  | 0         | Up   | 1.63  | 0.06  |      | Expressed protein                                                        |
| Pc_TC092336 | 1.89  | ##### | Up   | 0     | 2.95E-011 |      | 1.42  | 0.15      |      | -0.1  | 0.89  |      | Ribosomal protein S3Ae                                                   |
| Pc_TC092347 | -0.44 | 0.55  |      | 0.08  | 0.94      |      | 0     | 4.80E-005 |      | -3.7  | 0     | Down | Expressed protein                                                        |
| Pc_TC092354 | -0.31 | 0.72  |      | 0.43  | 0.62      |      | -1.24 | 0.33      |      | -2.34 | 0.02  | Down | Putative uncharacterized protein K0253H11.35                             |
| Pc_TC092355 | -1    | 0.05  | Down | -1.4  | 0.02      | Down | 1.35  | 0.15      |      | 0.3   | 0.63  |      | Expressed protein                                                        |
| Pc_TC092356 | -0.66 | 0.72  |      | -0.68 | 0.73      |      | 3.11  | 0.02      | Up   | 2.21  | 0.03  | Up   | Expressed protein                                                        |
| Pc_TC092360 | 1.2   | 0.01  | Up   | 0     | 2.76E-012 |      | 1.07  | 0.27      |      | -0.63 | 0.35  |      | eukaryotic translation initiation factor 4A1                             |
| Pc_TC092361 | 1.62  | 0     | Up   | 0     | 6.98E-007 |      | 1.15  | 0.28      |      | 0.29  | 0.72  |      | eukaryotic translation initiation factor 4A1                             |
| Pc_TC092366 | 0.19  | 0.73  |      | 0.37  | 0.56      |      | -2.27 | 0.04      | Down | -1.67 | 0.02  | Down | Expressed protein                                                        |
| Pc_TC092367 | 0.07  | 0.89  |      | 0.14  | 0.8       |      | -2.75 | 0.01      | Down | -2.83 | ##### | Down | Expressed protein                                                        |
| Pc_TC092382 | -1.45 | 0.04  | Down | -2.07 | 0.02      | Down | 1.18  | 0.26      |      | -0.34 | 0.66  |      | Expressed protein                                                        |
| Pc_TC092383 | -1.54 | 0.1   |      | 0.23  | 0.82      |      | -3.23 | 0.03      | Down | -2.11 | 0.04  | Down | Expressed protein                                                        |
| Pc_TC092402 | -3.88 | 0     | Down | -3.9  | 0.01      | Down | -4.45 | 0.01      | Down | -3.33 | 0.01  | Down | Expressed protein                                                        |
| Pc_TC092409 | -0.12 | 0.86  |      | 0.6   | 0.38      |      | -3.64 | 0         | Down | -1.03 | 0.18  |      | Expressed protein                                                        |
| Pc_TC092410 | 0.49  | 0.34  |      | 0.88  | 0.14      |      | -2.99 | 0.01      | Down | -2.55 | 0     | Down | Expressed protein                                                        |
| Pc_TC092432 | 0.06  | 0.95  |      | 0.18  | 0.83      |      | -3.23 | 0.01      | Down | -1.89 | 0.03  | Down | Expressed protein                                                        |
| Pc_TC092473 | -0.17 | 0.8   |      | -2.21 | 0.01      | Down | -0.27 | 0.81      |      | 0.77  | 0.28  |      | Transposable element protein,putative,RnaseH                             |
| Pc_TC092484 | 2.35  | 0     | Up   | 1.89  | 0.02      | Up   | 0.81  | 0.52      |      | 1.36  | 0.12  |      | pre-mRNA-processing protein 40A                                          |
| Pc_TC092494 | 0.18  | 0.84  |      | 0.68  | 0.43      |      | -3.85 | 0.01      | Down | -1.03 | 0.28  |      | Expressed protein                                                        |
| Pc_TC092496 | 0.44  | 0.41  |      | 1.24  | 0.04      | Up   | -6.98 | 5.14E-006 | Down | -0.67 | 0.34  |      | Expressed protein                                                        |
| Pc_TC092506 | 1.58  | 0.04  | Up   | 2.3   | 0.01      | Up   | 0.19  | 0.92      |      | 1.42  | 0.11  |      | Expressed protein                                                        |
| Pc_TC092518 | -1.07 | 0.22  |      | -1.63 | 0.12      |      | -1.08 | 0.4       |      | -2.18 | 0.04  | Down | Expressed protein                                                        |

|             |       |       |      |       |           |      |       |           |      |       |       |      |                                                               |         |
|-------------|-------|-------|------|-------|-----------|------|-------|-----------|------|-------|-------|------|---------------------------------------------------------------|---------|
| Pc_TC092522 | 0.36  | 0.5   |      | 1.25  | 0.04      | Up   | -3.08 | 0.01      | Down | -2.08 | 0.01  | Down | Expressed protein                                             |         |
| Pc_TC092525 | 0.19  | 0.78  |      | 0.87  | 0.22      |      | 0     | 1.34E-005 |      | -2.98 | 0     | Down | Expressed protein                                             |         |
| Pc_TC092543 | 0.24  | 0.64  |      | 0.75  | 0.21      |      | -3.01 | 0.01      | Down | -1.27 | 0.07  |      | Expressed protein                                             |         |
| Pc_TC092550 | 0.76  | 0.15  |      | 0.86  | 0.17      |      | -1.79 | 0.1       |      | -1.89 | 0.01  | Down | Expressed protein                                             |         |
| Pc_TC092570 | 0.1   | 0.83  |      | 1.35  | 0.01      | Up   | -4.33 | 0         | Down | -2.06 | 0     | Down | Expressed protein                                             |         |
| Pc_TC092575 | 0.79  | 0.18  |      | 0.4   | 0.58      |      | -0.09 | 0.94      |      | 1.88  | 0.01  | Up   | Expressed protein                                             |         |
| Pc_TC092584 | 1.49  | 0.04  | Up   | 0     | 0         |      | 1.29  | 0.27      |      | 0.07  | 0.97  |      | Expressed protein                                             |         |
| Pc_TC092593 | 2.4   | 0     | Up   | 0     | 0.03      |      | 1.61  | 0.23      |      | 0.25  | 0.89  |      | Expressed protein                                             |         |
| Pc_TC092597 | -0.54 | 0.52  |      | -5.47 | 0         | Down | 0.46  | 0.71      |      | -0.34 | 0.71  |      | Expressed protein                                             |         |
| Pc_TC092606 | 0.08  | 0.96  |      | 0.78  | 0.37      |      | 0     | 0         |      | -3.58 | 0     | Down | seed imbibition 2                                             |         |
| Pc_TC092621 | 0.77  | 0.39  |      | 0.19  | 0.9       |      | 1.34  | 0.29      |      | 1.79  | 0.04  | Up   | Expressed protein                                             |         |
| Pc_TC092624 | -0.08 | 0.91  |      | -0.72 | 0.33      |      | -2.9  | 0.02      | Down | -2.12 | 0.01  | Down | Expressed protein                                             |         |
| Pc_TC092626 | 0.08  | 0.93  |      | 0.77  | 0.3       |      | -2.21 | 0.08      |      | -1.84 | 0.04  | Down | Expressed protein                                             |         |
| Pc_TC092627 | 0.64  | 0.16  |      | 0.69  | 0.22      |      | -2.54 | 0.02      | Down | -0.36 | 0.57  |      | Expressed protein                                             |         |
| Pc_TC092639 | 2     | 0     | Up   | 0     | 1.74E-005 |      | 1.84  | 0.09      |      | -0.11 | 0.91  |      | Pyruvate kinase family protein                                |         |
| Pc_TC092661 | 0.93  | 0.07  |      | 1.51  | 0.01      | Up   | -3.8  | 0         | Down | -0.32 | 0.66  |      | Expressed protein                                             |         |
| Pc_TC092674 | -1.1  | 0.15  |      | -1.86 | 0.04      | Down | 0.33  | 0.77      |      | -0.4  | 0.64  |      | Expressed protein                                             |         |
| Pc_TC092677 | -1.09 | 0.29  |      | -2.37 | 0.07      |      | 0.07  | 0.99      |      | -3.13 | 0.02  | Down | Peptidyl-tRNA hydrolase family protein                        |         |
| Pc_TC092679 | -2.51 | 0.15  |      | 0.47  | 0.75      |      | 2.47  | 0.06      |      | 2.34  | 0.02  | Up   | Peptidyl-tRNA hydrolase family protein                        |         |
| Pc_TC092691 | -2.02 | 0.06  |      | -2.53 | 0.05      | Down | 1.42  | 0.23      |      | 0.36  | 0.72  |      | Expressed protein                                             |         |
| Pc_TC092696 | -0.29 | 0.64  |      | 0.81  | 0.21      |      | -1.77 | 0.11      |      | -1.68 | 0.03  | Down | Expressed protein                                             |         |
| Pc_TC092714 | 0.31  | 0.54  |      | 0.61  | 0.31      |      | -5.09 | 6.65E-005 | Down | -3.01 | ##### | Down | Expressed protein                                             |         |
| Pc_TC092722 | -3.68 | 0.01  | Down | -2.7  | 0.05      | Down | -2.67 | 0.09      |      | -4.13 | 0     | Down | Homeodomain-like superfamily protein                          | G2-like |
| Pc_TC092730 | 0.25  | 0.87  |      | 2.1   | 0.02      | Up   | 2.32  | 0.06      |      | 1.33  | 0.18  |      | Uncharacterized protein                                       |         |
| Pc_TC092739 | 1.82  | 0     | Up   | 0     | 1.16E-005 |      | 1.7   | 0.12      |      | -0.35 | 0.69  |      | Uncharacterized protein                                       |         |
| Pc_TC092740 | 1.27  | 0.03  | Up   | 0     | 5.59E-007 |      | 0.11  | 0.93      |      | 0.95  | 0.19  |      | Expressed protein                                             |         |
| Pc_TC092746 | -0.91 | 0.15  |      | -1.79 | 0.02      | Down | 0.78  | 0.45      |      | -0.21 | 0.78  |      | Putative uncharacterized protein OJ1484 G09.118               |         |
| Pc_TC092766 | 2.55  | 0.01  | Up   | 3.31  | 0         | Up   | 3.11  | 0.02      | Up   | 2.18  | 0.04  | Up   | phytochrome and flowering time regulatory protein (PFT1)      |         |
| Pc_TC092767 | 1.89  | 0     | Up   | 1.9   | 0.01      | Up   | -2.79 | 0.04      | Down | -1    | 0.26  |      | phytochrome and flowering time regulatory protein (PFT1)      |         |
| Pc_TC092769 | -0.11 | 0.82  |      | -0.18 | 0.76      |      | -0.7  | 0.47      |      | -1.41 | 0.03  | Down | phytochrome and flowering time regulatory protein (PFT1)      |         |
| Pc_TC092785 | 0     | 0.31  |      | -0.94 | 0.84      |      | 3.34  | 0.03      | Up   | 0.8   | 0.73  |      | Expressed protein                                             |         |
| Pc_TC092790 | 0.34  | 0.33  |      | 0.69  | 0.12      |      | -3.13 | 0         | Down | -1.97 | 0     | Down | Expressed protein                                             |         |
| Pc_TC092792 | 0.32  | 0.7   |      | -1.73 | 0.11      |      | 0.78  | 0.52      |      | 1.95  | 0.01  | Up   | high affinity K+ transporter 5                                |         |
| Pc_TC092806 | 0     | ##### |      | 0     | 2.00E-005 |      | -6.25 | 0         | Down | 0     | ##### |      | Ribosomal protein S5/Elongation factor G/III/V family protein |         |
| Pc_TC092843 | 0.38  | 0.51  |      | 0.31  | 0.66      |      | -2.53 | 0.03      | Down | -2.32 | 0     | Down | Saposis (Fragment)                                            |         |
| Pc_TC092845 | -0.34 | 0.65  |      | 1.53  | 0.03      | Up   | -3.12 | 0.02      | Down | -1.29 | 0.14  |      | Putative uncharacterized protein (Fragment)                   |         |
| Pc_TC092846 | -5.36 | ##### | Down | -4.96 | 1.35E-008 | Down | -4.13 | 0         | Down | -7.4  | ##### | Down | Expressed protein                                             |         |
| Pc_TC092853 | -1.04 | 0.25  |      | 0.36  | 0.7       |      | -1.97 | 0.15      |      | -2.08 | 0.05  | Down | Expressed protein                                             |         |
| Pc_TC092857 | 0.22  | 0.79  |      | 1.04  | 0.19      |      | -6.08 | 0         | Down | -5.96 | ##### | Down | Expressed protein                                             |         |
| Pc_TC092858 | 0.37  | 0.57  |      | -0.43 | 0.6       |      | 2.43  | 0.02      | Up   | 1.93  | 0.01  | Up   | Expressed protein                                             |         |
| Pc_TC092862 | 0.53  | 0.6   |      | 0.51  | 0.66      |      | -1.42 | 0.37      |      | -3.62 | 0.02  | Down | Expressed protein                                             |         |
| Pc_TC092864 | 0.01  | 0.99  |      | 0.75  | 0.21      |      | -2.36 | 0.03      | Down | -2.18 | 0     | Down | Expressed protein                                             |         |
| Pc_TC092866 | -2.16 | 0     | Down | -2.34 | 0         | Down | 1.01  | 0.33      |      | -0.05 | 0.95  |      | Putative uncharacterized protein                              |         |
| Pc_TC092867 | -0.48 | 0.66  |      | -1    | 0.4       |      | 1.49  | 0.22      |      | 1.9   | 0.03  | Up   | Expressed protein                                             |         |
| Pc_TC092897 | 0.84  | 0.19  |      | 0.92  | 0.22      |      | -2.8  | 0.03      | Down | 0.16  | 0.85  |      | Expressed protein                                             |         |
| Pc_TC092900 | -0.18 | 0.81  |      | 0.57  | 0.46      |      | -4.1  | 0         | Down | -2.32 | 0.01  | Down | Expressed protein                                             |         |
| Pc_TC092911 | 1.05  | 0.2   |      | 2.29  | 0.01      | Up   | -1.27 | 0.39      |      | -0.71 | 0.53  |      | Expressed protein                                             |         |
| Pc_TC092917 | 2.19  | 0.02  | Up   | 1.89  | 0.1       |      | 0.92  | 0.58      |      | 1.41  | 0.24  |      | Putative retroelement                                         |         |
| Pc_TC092920 | -1.57 | 0.05  | Down | -0.78 | 0.37      |      | 0.57  | 0.62      |      | -0.06 | 0.96  |      | Expressed protein                                             |         |
| Pc_TC092922 | -0.69 | 0.41  |      | -0.22 | 0.83      |      | -3.02 | 0.03      | Down | -1.44 | 0.13  |      | Expressed protein                                             |         |
| Pc_TC092924 | 1.47  | 0.2   |      | 2.52  | 0.02      | Up   | 0     | 0.08      |      | -1.79 | 0.36  |      | Expressed protein                                             |         |
| Pc_TC092941 | 0.27  | 0.59  |      | 1.44  | 0.01      | Up   | -0.2  | 0.85      |      | 0.76  | 0.22  |      | Expressed protein                                             |         |
| Pc_TC092944 | -0.46 | 0.47  |      | 0.07  | 0.93      |      | -2.3  | 0.05      |      | -1.58 | 0.05  | Down | Expressed protein                                             |         |
| Pc_TC092946 | 2.08  | 0     | Up   | 0     | 0         |      | 1.67  | 0.14      |      | 0.26  | 0.79  |      | emp24/gp25L/p24 family/GOLD family protein                    |         |
| Pc_TC092954 | 2.62  | 0.01  | Up   | 0.28  | 0.97      |      | 1.24  | 0.48      |      | 1.56  | 0.25  |      | Expressed protein                                             |         |
| Pc_TC092958 | -0.43 | 0.5   |      | 0.18  | 0.81      |      | -1.78 | 0.12      |      | -2.25 | 0.01  | Down | Expressed protein                                             |         |
| Pc_TC092963 | 1     | 0.42  |      | 0.47  | 0.79      |      | 2.52  | 0.06      |      | 2.26  | 0.03  | Up   | Expressed protein                                             |         |
| Pc_TC092966 | -0.29 | 0.71  |      | 0.47  | 0.56      |      | -3.01 | 0.03      | Down | -1.4  | 0.12  |      | Expressed protein                                             |         |
| Pc_TC092967 | -1.88 | 0.02  | Down | 0.27  | 0.75      |      | 0.01  | 1         |      | -0.4  | 0.64  |      | Expressed protein                                             |         |
| Pc_TC092969 | -0.42 | 0.65  |      | 1.2   | 0.16      |      | -3    | 0.05      | Down | -1.65 | 0.12  |      | Expressed protein                                             |         |
| Pc_TC092995 | 2.08  | 0.54  |      | 2.87  | 0.28      |      | 4.2   | 0.05      |      | 4.38  | 0.01  | Up   | Expressed protein                                             |         |
| Pc_TC093016 | 0.35  | 0.64  |      | 1.04  | 0.18      |      | -4.25 | 0         | Down | -6.13 | ##### | Down | Expressed protein                                             |         |



|             |       |       |      |       |           |      |       |           |      |       |       |      |                                                                               |     |
|-------------|-------|-------|------|-------|-----------|------|-------|-----------|------|-------|-------|------|-------------------------------------------------------------------------------|-----|
| Pc_TC093028 | 1.61  | 0     | Up   | -7.68 | 1.07E-010 | Down | 1.32  | 0.18      |      | 0.21  | 0.76  |      | actin-11                                                                      |     |
| Pc_TC093032 | 0.51  | 0.38  |      | 0.67  | 0.32      |      | -4.49 | 0         | Down | -2.12 | 0.01  | Down | Expressed protein                                                             |     |
| Pc_TC093034 | 2.2   | 0.01  | Up   | 1.55  | 0.17      |      | 1.88  | 0.17      |      | 0.17  | 0.96  |      | Expressed protein                                                             |     |
| Pc_TC093070 | -1.24 | 0.13  |      | -2.26 | 0.03      | Down | 0.98  | 0.38      |      | -0.11 | 0.91  |      | Expressed protein                                                             |     |
| Pc_TC093077 | 0.07  | 0.88  |      | 0.04  | 0.95      |      | -2    | 0.05      | Down | -1.87 | 0     | Down | Uncharacterized protein                                                       |     |
| Pc_TC093093 | 0.67  | 0.33  |      | 1.95  | 0.01      | Up   | -3.01 | 0.03      | Down | -2.04 | 0.03  | Down | Expressed protein                                                             |     |
| Pc_TC093111 | 0.36  | 0.25  |      | 0.43  | 0.29      |      | -2.8  | 0         | Down | -1.68 | 0     | Down | Expressed protein                                                             |     |
| Pc_TC093113 | -2.83 | 0.02  | Down | -1.39 | 0.22      |      | -0.23 | 0.88      |      | -0.64 | 0.54  |      | Uncharacterized protein                                                       |     |
| Pc_TC093124 | 2.09  | ##### | Up   | 0     | 8.56E-008 |      | 1.26  | 0.23      |      | -0.78 | 0.31  |      | rotamase CYP 1                                                                |     |
| Pc_TC093127 | 0.36  | 0.79  |      | 0.64  | 0.61      |      | -3.3  | 0.1       |      | -4.18 | 0.03  | Down | Expressed protein                                                             |     |
| Pc_TC093140 | 0.24  | 0.65  |      | 0.83  | 0.17      |      | -2.27 | 0.04      | Down | -0.71 | 0.31  |      | Expressed protein                                                             |     |
| Pc_TC093145 | 1.05  | 0.18  |      | 0.2   | 0.87      |      | 1.25  | 0.3       |      | 1.65  | 0.05  | Up   | Expressed protein                                                             |     |
| Pc_TC093152 | 0.53  | 0.52  |      | 1.2   | 0.16      |      | 1.8   | 0.12      |      | 1.8   | 0.03  | Up   | Expressed protein                                                             |     |
| Pc_TC093156 | -0.01 | 1     |      | 0.79  | 0.21      |      | -4.03 | 0         | Down | -1.96 | 0.01  | Down | Uncharacterized protein                                                       |     |
| Pc_TC093160 | 0     | 1     |      | 4.92  | 0         | Up   | 2.5   | 0.42      |      | 0.63  | 1     |      | Expressed protein                                                             |     |
| Pc_TC093161 | -0.01 | 0.99  |      | 0.06  | 0.89      |      | -5.99 | 4.34E-008 | Down | -3.63 | ##### | Down | Uncharacterized protein                                                       |     |
| Pc_TC093168 | -0.85 | 0.23  |      | -1.13 | 0.18      |      | 2.07  | 0.05      | Up   | 1.63  | 0.02  | Up   | Expressed protein                                                             |     |
| Pc_TC093178 | 0.08  | 0.91  |      | 0.47  | 0.49      |      | -2.23 | 0.05      |      | -1.56 | 0.04  | Down | Expressed protein                                                             |     |
| Pc_TC093182 | 2.37  | ##### | Up   | 1.06  | 0.1       |      | -0.46 | 0.67      |      | 1.61  | 0.02  | Up   | Expressed protein                                                             |     |
| Pc_TC093191 | 1.52  | 0.03  | Up   | 1.57  | 0.05      | Up   | 0.54  | 0.66      |      | 1.82  | 0.02  | Up   | Expressed protein                                                             |     |
| Pc_TC093210 | 2.56  | 0     | Up   | 0.98  | 0.45      |      | 2.25  | 0.1       |      | 1.43  | 0.21  |      | DNA/RNA polymerases superfamily protein                                       |     |
| Pc_TC093221 | 2.33  | 0.02  | Up   | 1.31  | 0.33      |      | 0.2   | 0.97      |      | 1.08  | 0.41  |      | Expressed protein                                                             |     |
| Pc_TC093243 | 0.22  | 0.6   |      | 0.53  | 0.3       |      | -2.51 | 0.01      | Down | -1.28 | 0.04  | Down | Expressed protein                                                             |     |
| Pc_TC093251 | 1.22  | 0     | Up   | 0     | 2.38E-015 |      | 1.25  | 0.18      |      | 0.4   | 0.51  |      | GATA type zinc finger transcription factor family protein                     | LIM |
| Pc_TC093256 | -1.41 | 0.18  |      | -1.75 | 0.15      |      | -0.72 | 0.61      |      | -2.37 | 0.05  | Down | Expressed protein                                                             |     |
| Pc_TC093257 | 1.18  | 0.03  | Up   | 0.48  | 0.48      |      | -0.84 | 0.44      |      | 1.14  | 0.09  |      | Expressed protein                                                             |     |
| Pc_TC093280 | -0.92 | 0.65  |      | -1.36 | 0.54      |      | 3.22  | 0.02      | Up   | -0.57 | 0.79  |      | serine carboxypeptidase-like 19                                               |     |
| Pc_TC093281 | -0.51 | 0.82  |      | -1.11 | 0.58      |      | 3.42  | 0.01      | Up   | 1.54  | 0.18  |      | serine carboxypeptidase-like 18                                               |     |
| Pc_TC093282 | -3.31 | 0.02  | Down | -0.25 | 0.87      |      | 0.28  | 0.86      |      | -0.37 | 0.77  |      | serine carboxypeptidase-like 3                                                |     |
| Pc_TC093312 | 0.84  | 0.05  |      | 1.21  | 0.02      | Up   | -1.43 | 0.15      |      | 0.21  | 0.72  |      | Expressed protein                                                             |     |
| Pc_TC093331 | -2.49 | 0     | Down | -0.26 | 0.74      |      | -0.09 | 0.94      |      | -1.39 | 0.09  |      | Expressed protein                                                             |     |
| Pc_TC093333 | -1.28 | 0.02  | Down | -0.49 | 0.43      |      | -0.73 | 0.46      |      | -0.73 | 0.26  |      | Expressed protein                                                             |     |
| Pc_TC093337 | 0.17  | 0.75  |      | 1.29  | 0.02      | Up   | -2.48 | 0.02      | Down | -1.24 | 0.07  |      | Expressed protein                                                             |     |
| Pc_TC093347 | 1.69  | 0.05  | Up   | 0.92  | 0.41      |      | -0.1  | 0.99      |      | 0.87  | 0.42  |      | Putative translation initiation factor                                        |     |
| Pc_TC093349 | -2.92 | 0.01  | Down | -0.3  | 0.8       |      | -0.14 | 0.94      |      | -2.79 | 0.02  | Down | Expressed protein                                                             |     |
| Pc_TC093355 | -0.41 | 0.61  |      | -0.43 | 0.64      |      | -3.2  | 0.02      | Down | -2.27 | 0.02  | Down | Expressed protein                                                             |     |
| Pc_TC093359 | 0.3   | 0.64  |      | 0.09  | 0.92      |      | -3.51 | 0.01      | Down | -2.45 | 0     | Down | Expressed protein                                                             |     |
| Pc_TC093368 | -2.73 | 0.05  | Down | -2.75 | 0.07      |      | -0.43 | 0.79      |      | -0.01 | 1     |      | Expressed protein                                                             |     |
| Pc_TC093378 | -2.62 | 0.03  | Down | -1.18 | 0.32      |      | 0.5   | 0.71      |      | -0.49 | 0.66  |      | Expressed protein                                                             |     |
| Pc_TC093398 | -0.68 | 0.51  |      | 1.76  | 0.04      | Up   | -0.44 | 0.76      |      | -0.37 | 0.74  |      | Expressed protein                                                             |     |
| Pc_TC093439 | -0.14 | 0.92  |      | 1.45  | 0.09      |      | -3.35 | 0.04      | Down | -2.06 | 0.07  |      | Uncharacterized protein                                                       |     |
| Pc_TC093443 | 2.05  | ##### | Up   | 0     | 2.44E-013 |      | 1.82  | 0.05      |      | 0.52  | 0.41  |      | Expressed protein                                                             |     |
| Pc_TC093444 | 7.8   | ##### | Up   | 0     | 1         |      | 7.76  | 2.39E-006 | Up   | 0.63  | 1     |      | FAD-containing monooxygenase EthA                                             |     |
| Pc_TC093479 | -0.12 | 0.91  |      | -3.17 | 0.01      | Down | 1.7   | 0.13      |      | 1.63  | 0.03  | Up   | Expressed protein                                                             |     |
| Pc_TC093481 | 2.58  | ##### | Up   | -5.19 | 2.76E-005 | Down | 1.87  | 0.08      |      | 0.85  | 0.25  |      | ATP synthase subunit 1                                                        |     |
| Pc_TC093483 | 0.31  | 0.32  |      | 0.26  | 0.52      |      | -2.28 | 0.01      | Down | -0.85 | 0.1   |      | Expressed protein                                                             |     |
| Pc_TC093486 | 0.55  | 0.4   |      | 1.42  | 0.04      | Up   | -2.23 | 0.07      |      | -0.3  | 0.72  |      | NAC (No Apical Meristem) domain transcriptional regulator superfamily protein |     |
| Pc_TC093487 | 0.29  | 0.64  |      | 0.49  | 0.49      |      | -5.69 | 0         | Down | -3.7  | ##### | Down | Expressed protein                                                             |     |
| Pc_TC093493 | 0.63  | 0.05  |      | 0.7   | 0.09      |      | -4.9  | 1.21E-006 | Down | -1.7  | 0     | Down | Expressed protein                                                             |     |
| Pc_TC093495 | -1.14 | 0.32  |      | 0.13  | 0.95      |      | -1.72 | 0.27      |      | -3.77 | 0.01  | Down | Expressed protein                                                             |     |
| Pc_TC093498 | -2.07 | 0     | Down | 0.08  | 0.92      |      | -1.54 | 0.17      |      | -2.52 | 0     | Down | Expressed protein                                                             |     |
| Pc_TC093510 | -0.81 | 0.43  |      | 0.64  | 0.52      |      | -3.61 | 0.03      | Down | -2.08 | 0.08  |      | Expressed protein                                                             |     |
| Pc_TC093525 | -2.34 | 0.01  | Down | -2.72 | 0.01      | Down | 1.21  | 0.28      |      | 0.43  | 0.61  |      | Expressed protein                                                             |     |
| Pc_TC093530 | 0.44  | 0.46  |      | 0.78  | 0.25      |      | -2.5  | 0.04      | Down | -2.23 | 0.01  | Down | Expressed protein                                                             |     |
| Pc_TC093539 | -2.29 | 0.04  | Down | -3.31 | 0.02      | Down | 0.8   | 0.52      |      | 0.29  | 0.78  |      | Expressed protein                                                             |     |
| Pc_TC093543 | 0.62  | 0.28  |      | 0.69  | 0.31      |      | -5.43 | 0         | Down | -2.14 | 0.01  | Down | Expressed protein                                                             |     |
| Pc_TC093549 | -1.71 | 0     | Down | 0.84  | 0.17      |      | -1.79 | 0.1       |      | 0.65  | 0.32  |      | MSCS-like 3                                                                   |     |
| Pc_TC093550 | 0.48  | 0.43  |      | 1.64  | 0.01      | Up   | 0.31  | 0.78      |      | -1.29 | 0.1   |      | MSCS-like 3                                                                   |     |
| Pc_TC093551 | 0.37  | 0.32  |      | 0.44  | 0.36      |      | -3.3  | 0         | Down | -1.42 | 0.01  | Down | MSCS-like 3                                                                   |     |
| Pc_TC093558 | 0.33  | 0.62  |      | 0.93  | 0.19      |      | -1.91 | 0.11      |      | -1.78 | 0.04  | Down | Expressed protein                                                             |     |
| Pc_TC093571 | 0.28  | 0.81  |      | 1.82  | 0.04      | Up   | -2.5  | 0.13      |      | -3.11 | 0.03  | Down | Expressed protein                                                             |     |
| Pc_TC093595 | -1.73 | 0.02  | Down | -0.68 | 0.38      |      | 4.15  | 3.85E-005 | Up   | 2.86  | ##### | Up   | Leucine-rich repeat (LRR) family protein                                      |     |

|             |       |       |      |  |       |           |      |  |       |           |      |       |       |      |                                                                          |
|-------------|-------|-------|------|--|-------|-----------|------|--|-------|-----------|------|-------|-------|------|--------------------------------------------------------------------------|
| Pc_TC093600 | -0.54 | 0.53  |      |  | -1.2  | 0.23      |      |  | -2.12 | 0.12      |      | -2.34 | 0.03  | Down | Uncharacterized protein                                                  |
| Pc_TC093607 | 6.22  | ##### | Up   |  | 0     | 0.67      |      |  | 3.96  | 0.02      | Up   | 0.63  | 0.96  |      | Expressed protein                                                        |
| Pc_TC093608 | 0.5   | 0.41  |      |  | 1.34  | 0.04      | Up   |  | -2.39 | 0.05      | Down | -1.14 | 0.15  |      | Expressed protein                                                        |
| Pc_TC093612 | -1.79 | 0.02  | Down |  | 0.09  | 0.92      |      |  | 0.63  | 0.56      |      | 1.43  | 0.04  | Up   | Expressed protein                                                        |
| Pc_TC093626 | 0.76  | 0.01  |      |  | 0.95  | 0.01      |      |  | -2.87 | 0         | Down | -1.28 | 0.01  | Down | Expressed protein                                                        |
| Pc_TC093630 | 1.86  | 0     | Up   |  | 0     | 3.61E-007 |      |  | 1.51  | 0.15      |      | -0.12 | 0.89  |      | Ribosomal protein L23/L15e family protein                                |
| Pc_TC093648 | 3.25  | 0     | Up   |  | 0     | 0.09      |      |  | 3.81  | 0         | Up   | 1.88  | 0.09  |      | Expressed protein                                                        |
| Pc_TC093650 | 0.27  | 0.86  |      |  | 2.44  | 0.01      | Up   |  | -3.3  | 0.1       |      | -3.18 | 0.06  |      | Expressed protein                                                        |
| Pc_TC093655 | 1.48  | 0.04  | Up   |  | 1.41  | 0.1       |      |  | 0.36  | 0.79      |      | 0.45  | 0.64  |      | Expressed protein                                                        |
| Pc_TC093662 | 0.02  | 1     |      |  | 0.46  | 0.67      |      |  | -3.14 | 0.06      |      | -2.7  | 0.04  | Down | Expressed protein                                                        |
| Pc_TC093686 | 0.22  | 0.76  |      |  | 0.56  | 0.46      |      |  | -2.21 | 0.08      |      | -1.78 | 0.05  | Down | Expressed protein                                                        |
| Pc_TC093687 | 4.17  | 0.02  | Up   |  | 2.38  | 0.46      |      |  | 4.96  | 0.01      | Up   | 3.43  | 0.1   |      | Expressed protein                                                        |
| Pc_TC093688 | -4.62 | 0     | Down |  | -1.64 | 0.18      |      |  | 2.2   | 0.06      |      | 1.19  | 0.18  |      | Expressed protein                                                        |
| Pc_TC093689 | -1.99 | 0.11  |      |  | -3.33 | 0.04      | Down |  | 1.47  | 0.24      |      | -2.45 | 0.07  |      | Expressed protein                                                        |
| Pc_TC093695 | 0.28  | 0.69  |      |  | 0.86  | 0.25      |      |  | -2.98 | 0.02      | Down | -1.8  | 0.05  | Down | Expressed protein                                                        |
| Pc_TC093697 | -0.05 | 0.98  |      |  | -0.44 | 0.64      |      |  | -4.08 | 0.01      | Down | -2.64 | 0.01  | Down | Expressed protein                                                        |
| Pc_TC093709 | 2.02  | 0     | Up   |  | 0     | 1.23E-006 |      |  | 1.96  | 0.06      |      | 0.6   | 0.43  |      | Ribosomal L29 family protein                                             |
| Pc_TC093713 | -3.92 | 0.03  | Down |  | -1.62 | 0.28      |      |  | 0.31  | 0.86      |      | -1.37 | 0.31  |      | Expressed protein                                                        |
| Pc_TC093755 | 1.4   | 0.19  |      |  | 2.76  | 0.01      | Up   |  | -2.82 | 0.2       |      | -3.7  | 0.08  |      | Expressed protein                                                        |
| Pc_TC093758 | -0.46 | 0.6   |      |  | 0.45  | 0.62      |      |  | -1.25 | 0.34      |      | -2.6  | 0.02  | Down | Expressed protein                                                        |
| Pc_TC093773 | 3.66  | ##### | Up   |  | 0     | 0         |      |  | 2.13  | 0.06      |      | 0.54  | 0.55  |      | Expressed protein                                                        |
| Pc_TC093783 | -1.66 | 0.02  | Down |  | -2.89 | 0         | Down |  | 0.44  | 0.68      |      | -0.93 | 0.24  |      | P-loop containing nucleoside triphosphate hydrolases superfamily protein |
| Pc_TC093787 | 0.46  | 0.46  |      |  | 0.52  | 0.47      |      |  | -7.1  | 4.30E-005 | Down | -4.17 | ##### | Down | Expressed protein                                                        |
| Pc_TC093788 | -3.58 | 0     | Down |  | -0.38 | 0.71      |      |  | -5.74 | 0         | Down | -3.62 | 0     | Down | Expressed protein                                                        |
| Pc_TC093793 | 1.26  | 0.04  | Up   |  | 0     | 1         |      |  | 1.52  | 0.16      |      | 1.31  | 0.07  |      | BED zinc finger ;hAT family dimerisation domain                          |
| Pc_TC093794 | 0.69  | 0.18  |      |  | 0.66  | 0.29      |      |  | 0.85  | 0.4       |      | 1.37  | 0.03  | Up   | BED zinc finger ;hAT family dimerisation domain                          |
| Pc_TC093808 | -0.59 | 0.18  |      |  | -0.17 | 0.76      |      |  | -7.45 | 2.95E-008 | Down | -3.6  | ##### | Down | Expressed protein                                                        |
| Pc_TC093822 | 0.42  | 0.73  |      |  | -1.26 | 0.4       |      |  | 2.55  | 0.04      | Up   | 1.04  | 0.33  |      | Expressed protein                                                        |
| Pc_TC093825 | 0.05  | 0.93  |      |  | 0.24  | 0.69      |      |  | -1.23 | 0.24      |      | -1.66 | 0.02  | Down | Expressed protein                                                        |
| Pc_TC093830 | -0.92 | 0.48  |      |  | -0.13 | 0.97      |      |  | 0     | 0.01      |      | -4.37 | 0.02  | Down | Uncharacterized protein                                                  |
| Pc_TC093844 | -0.16 | 0.8   |      |  | -1.65 | 0.03      | Down |  | 1.41  | 0.17      |      | 0.92  | 0.18  |      | Expressed protein                                                        |
| Pc_TC093848 | -1.6  | 0.01  | Down |  | -0.27 | 0.68      |      |  | -0.51 | 0.62      |      | -0.89 | 0.2   |      | zinc transporter 12 precursor                                            |
| Pc_TC093857 | -0.61 | 0.6   |      |  | 0.06  | 1         |      |  | -4.89 | 0.02      | Down | -1.96 | 0.12  |      | Uncharacterized protein                                                  |
| Pc_TC093871 | -7.8  | ##### | Down |  | 0     | 3.12E-012 |      |  | -5.2  | 5.54E-005 | Down | -8.25 | ##### | Down | actin 4                                                                  |
| Pc_TC093876 | -1.04 | 0.32  |      |  | -0.12 | 0.95      |      |  | -1.2  | 0.4       |      | -2.75 | 0.03  | Down | Expressed protein                                                        |
| Pc_TC093879 | -0.92 | 0.39  |      |  | -0.53 | 0.67      |      |  | -3.08 | 0.06      |      | -3.96 | 0.01  | Down | Expressed protein                                                        |
| Pc_TC093881 | 1.36  | 0.04  | Up   |  | 0.35  | 0.69      |      |  | -3.93 | 0.01      | Down | -2.32 | 0.02  | Down | Expressed protein                                                        |
| Pc_TC093904 | 2.4   | 0.06  |      |  | 2.23  | 0.13      |      |  | 2.93  | 0.07      |      | 2.8   | 0.03  | Up   | Expressed protein                                                        |
| Pc_TC093910 | -2.86 | 0     | Down |  | -0.52 | 0.5       |      |  | -3.14 | 0.01      | Down | -0.61 | 0.43  |      | Ubiquitin-like superfamily protein                                       |
| Pc_TC093916 | -0.07 | 0.98  |      |  | -0.9  | 0.41      |      |  | -2.13 | 0.14      |      | -2.74 | 0.02  | Down | Ubiquitin-like superfamily protein                                       |
| Pc_TC093931 | -2.44 | ##### | Down |  | -1.25 | 0.06      |      |  | 0.53  | 0.6       |      | -0.24 | 0.72  |      | ACT-like protein tyrosine kinase family protein                          |
| Pc_TC093933 | -0.41 | 0.69  |      |  | -0.29 | 0.81      |      |  | -2.3  | 0.12      |      | -2.6  | 0.03  | Down | Expressed protein                                                        |
| Pc_TC093970 | -1.18 | 0.28  |      |  | 0.76  | 0.44      |      |  | -5.08 | 0.01      | Down | -1.79 | 0.13  |      | Expressed protein                                                        |
| Pc_TC093975 | -0.08 | 0.89  |      |  | 1.29  | 0.03      | Up   |  | -1.64 | 0.13      |      | -0.8  | 0.25  |      | Uncharacterized protein                                                  |
| Pc_TC093988 | -0.15 | 0.8   |      |  | 0.1   | 0.89      |      |  | -7.84 | 3.00E-006 | Down | -1.27 | 0.08  |      | Expressed protein                                                        |
| Pc_TC093989 | -0.38 | 0.47  |      |  | -0.22 | 0.74      |      |  | -6.17 | 6.42E-006 | Down | -1.52 | 0.03  | Down | Expressed protein                                                        |
| Pc_TC093990 | 1.15  | 0.06  |      |  | -0.56 | 0.49      |      |  | -3.76 | 0.01      | Down | 0     | 1     |      | Expressed protein                                                        |
| Pc_TC093996 | 0.26  | 0.7   |      |  | 1.41  | 0.04      | Up   |  | -0.61 | 0.6       |      | -0.78 | 0.34  |      | Expressed protein                                                        |
| Pc_TC094015 | 1     | 0.09  |      |  | 1.07  | 0.12      |      |  | -0.25 | 0.83      |      | 1.49  | 0.03  | Up   | Uncharacterized protein                                                  |
| Pc_TC094018 | -1.41 | 0.04  | Down |  | -0.1  | 0.91      |      |  | -0.57 | 0.61      |      | -0.72 | 0.35  |      | Uncharacterized protein                                                  |
| Pc_TC094024 | 0.08  | 0.97  |      |  | 0.1   | 0.95      |      |  | 2.13  | 0.06      |      | 1.84  | 0.02  | Up   | Uncharacterized protein                                                  |
| Pc_TC094035 | 0.12  | 0.86  |      |  | 0.43  | 0.54      |      |  | -2.12 | 0.07      |      | -1.88 | 0.02  | Down | Expressed protein                                                        |
| Pc_TC094038 | 0.16  | 0.81  |      |  | 0.24  | 0.75      |      |  | -2.33 | 0.05      | Down | -1.69 | 0.04  | Down | Protein kinase superfamily protein                                       |
| Pc_TC094039 | 1.85  | 0.02  | Up   |  | 0     | 0.01      |      |  | 1.3   | 0.31      |      | 0.73  | 0.48  |      | ARM repeat superfamily protein                                           |
| Pc_TC094054 | -2.46 | 0.03  | Down |  | -3.8  | 0.01      | Down |  | -0.77 | 0.58      |      | -1.06 | 0.32  |      | Expressed protein                                                        |
| Pc_TC094060 | 0.27  | 0.64  |      |  | 0.48  | 0.47      |      |  | -2.88 | 0.01      | Down | -1.95 | 0.01  | Down | Expressed protein                                                        |
| Pc_TC094081 | 0.22  | 0.69  |      |  | 0.34  | 0.61      |      |  | -1.09 | 0.31      |      | -1.72 | 0.02  | Down | Expressed protein                                                        |
| Pc_TC094085 | 0.76  | 0.08  |      |  | 1.26  | 0.02      | Up   |  | -2.93 | 0.01      | Down | -1.35 | 0.04  | Down | Expressed protein                                                        |
| Pc_TC094100 | 1.84  | 0.01  | Up   |  | 0     | 0         |      |  | 1.65  | 0.15      |      | 0.42  | 0.66  |      | Expressed protein                                                        |
| Pc_TC094103 | -0.29 | 0.65  |      |  | 0.43  | 0.54      |      |  | -3.18 | 0.01      | Down | -1.59 | 0.04  | Down | Expressed protein                                                        |
| Pc_TC094112 | -0.64 | 0.19  |      |  | -0.8  | 0.18      |      |  | 1.82  | 0.05      | Up   | 1.11  | 0.06  |      | Expressed protein                                                        |
| Pc_TC094120 | -0.73 | 0.61  |      |  | -1.16 | 0.45      |      |  | -2.3  | 0.21      |      | -4.18 | 0.03  | Down | Expressed protein                                                        |

|             |       |       |      |       |           |      |       |           |      |       |       |      |                                                                          |
|-------------|-------|-------|------|-------|-----------|------|-------|-----------|------|-------|-------|------|--------------------------------------------------------------------------|
| Pc_TC094133 | 0     | ##### |      | -4.48 | 3.41E-005 | Down | -3.23 | 0.01      | Down | -5.91 | ##### | Down | Expressed protein                                                        |
| Pc_TC094142 | 1.65  | 0     | Up   | 0     | 3.61E-010 |      | 1.32  | 0.19      |      | -0.1  | 0.9   |      | Ribosomal protein S7e family protein                                     |
| Pc_TC094143 | 0.08  | 0.94  |      | 0.16  | 0.87      |      | -3.44 | 0.02      | Down | -2.22 | 0.02  | Down | Expressed protein                                                        |
| Pc_TC094152 | 0.22  | 0.73  |      | 0.12  | 0.88      |      | -3.56 | 0.01      | Down | -0.75 | 0.33  |      | Expressed protein                                                        |
| Pc_TC094167 | -2.96 | 0     | Down | -0.54 | 0.5       |      | 0.46  | 0.68      |      | 0.54  | 0.47  |      | Ras-related small GTP-binding family protein                             |
| Pc_TC094168 | 1.37  | 0     | Up   | 0     | 2.31E-013 |      | 1.45  | 0.13      |      | -0.05 | 0.94  |      | translationally controlled tumor protein                                 |
| Pc_TC094189 | 0.21  | 0.77  |      | -1.11 | 0.2       |      | 1.62  | 0.13      |      | 1.73  | 0.02  | Up   | Expressed protein                                                        |
| Pc_TC094191 | -1.09 | 0.55  |      | 1.14  | 0.39      |      | 2.62  | 0.05      |      | 2.18  | 0.04  | Up   | Expressed protein                                                        |
| Pc_TC094193 | -3.68 | 0     | Down | 0.37  | 0.66      |      | 1.96  | 0.07      |      | 1.22  | 0.11  |      | Expressed protein                                                        |
| Pc_TC094194 | -1.55 | 0.02  | Down | -2.16 | 0.01      | Down | -1.09 | 0.32      |      | -1.42 | 0.06  |      | Expressed protein                                                        |
| Pc_TC094203 | -2.56 | 0     | Down | 0.77  | 0.24      |      | 0.15  | 0.89      |      | 0.77  | 0.26  |      | Retrovirus-related Pol polyprotein LINE-1                                |
| Pc_TC094206 | 1.96  | ##### | Up   | 0.26  | 0.7       |      | 1.4   | 0.16      |      | 0.84  | 0.2   |      | Expressed protein                                                        |
| Pc_TC094256 | -1    | 0.2   |      | -1.92 | 0.05      | Down | 0.54  | 0.64      |      | -0.09 | 0.94  |      | Expressed protein                                                        |
| Pc_TC094258 | 1.88  | 0     | Up   | 0     | 2.85E-006 |      | 1.16  | 0.28      |      | -0.44 | 0.6   |      | Dolichyl-P-Man:Man(7)GlcNAc(2)-PP-dolichyl-alpha-1,6-mannosyltransferase |
| Pc_TC094263 | -2.36 | 0.01  | Down | 0.21  | 0.81      |      | -0.37 | 0.76      |      | -1.23 | 0.16  |      | ribulose biphosphate carboxylase small chain 1A                          |
| Pc_TC094267 | 0.22  | 0.47  |      | 0.26  | 0.51      |      | -2.13 | 0.01      | Down | -1.86 | 0     | Down | Expressed protein                                                        |
| Pc_TC094274 | 1.79  | 0     | Up   | 0     | 1.28E-007 |      | 1.69  | 0.11      |      | 0.55  | 0.45  |      | Uncharacterized protein                                                  |
| Pc_TC094278 | 1.33  | 0.06  |      | 1.81  | 0.02      | Up   | -3.12 | 0.04      | Down | -0.45 | 0.65  |      | Expressed protein                                                        |
| Pc_TC094279 | 1.81  | 0.02  | Up   | 1.57  | 0.1       |      | -3.74 | 0.05      | Down | 0.8   | 0.43  |      | Expressed protein                                                        |
| Pc_TC094282 | 0.33  | 0.72  |      | 0.61  | 0.51      |      | -3.17 | 0.04      | Down | -1.92 | 0.08  |      | Expressed protein                                                        |
| Pc_TC094285 | 0.47  | 0.44  |      | 0.39  | 0.59      |      | -1.97 | 0.09      |      | -1.77 | 0.03  | Down | Expressed protein                                                        |
| Pc_TC094302 | -1.01 | 0.22  |      | 0     | 1         |      | -2.71 | 0.05      | Down | -1.59 | 0.09  |      | Expressed protein                                                        |
| Pc_TC094315 | 0.34  | 0.85  |      | 2.23  | 0.04      | Up   | 0     | 0.05      |      | -2.7  | 0.15  |      | Expressed protein                                                        |
| Pc_TC094319 | 0.33  | 0.51  |      | 0.53  | 0.37      |      | -2.64 | 0.02      | Down | -1.15 | 0.09  |      | Expressed protein                                                        |
| Pc_TC094324 | 0.48  | 0.22  |      | 1.12  | 0.02      | Up   | -4.75 | 2.03E-005 | Down | -1.9  | 0     | Down | Uncharacterized protein                                                  |
| Pc_TC094330 | 0.81  | 0.1   |      | 0.59  | 0.33      |      | -4.22 | 0         | Down | -1.13 | 0.11  |      | Expressed protein                                                        |
| Pc_TC094332 | -2.32 | 0.02  | Down | -4.15 | 0         | Down | -0.62 | 0.64      |      | -1.5  | 0.14  |      | Expressed protein                                                        |
| Pc_TC094334 | -0.18 | 0.73  |      | -0.6  | 0.34      |      | -2.39 | 0.03      | Down | -2.2  | 0     | Down | Expressed protein                                                        |
| Pc_TC094344 | 0.29  | 0.56  |      | 0.89  | 0.12      |      | -2.14 | 0.04      | Down | -0.92 | 0.17  |      | Expressed protein                                                        |
| Pc_TC094363 | -1.04 | 0.03  | Down | -0.66 | 0.25      |      | 0.39  | 0.68      |      | 0.22  | 0.71  |      | Expressed protein                                                        |
| Pc_TC094378 | 1.15  | 0.13  |      | 1.77  | 0.03      | Up   | -1.4  | 0.32      |      | 0.04  | 1     |      | RNA binding;RNA-directed DNA polymerases                                 |
| Pc_TC094397 | -0.37 | 0.73  |      | -0.47 | 0.69      |      | -4.2  | 0.02      | Down | -2.08 | 0.08  |      | Expressed protein                                                        |
| Pc_TC094412 | -0.14 | 0.85  |      | 0.55  | 0.46      |      | -1.5  | 0.21      |      | -2.34 | 0.01  | Down | Putative clathrin coat assembly protein                                  |
| Pc_TC094429 | 0.85  | 0.23  |      | 1.41  | 0.07      |      | -3.18 | 0.03      | Down | -0.91 | 0.33  |      | Expressed protein                                                        |
| Pc_TC094437 | -0.88 | 0.11  |      | -1.66 | 0.02      | Down | 0.26  | 0.8       |      | -0.13 | 0.86  |      | MAR-binding protein,putative,expressed                                   |
| Pc_TC094444 | 0.78  | 0.21  |      | 0.47  | 0.54      |      | -0.27 | 0.82      |      | 1.59  | 0.03  | Up   | Expressed protein                                                        |
| Pc_TC094456 | -2.63 | 0     | Down | -1.58 | 0.09      |      | -0.13 | 0.92      |      | -1.45 | 0.11  |      | Uncharacterized protein                                                  |
| Pc_TC094459 | -1.42 | 0.14  |      | -3.44 | 0.01      | Down | 0.59  | 0.64      |      | 0.52  | 0.57  |      | Uncharacterized protein                                                  |
| Pc_TC094460 | 0.33  | 0.55  |      | 0.89  | 0.16      |      | -2.29 | 0.04      | Down | 0.3   | 0.66  |      | pleiotropic drug resistance 6                                            |
| Pc_TC094469 | -0.82 | 0.33  |      | -2.37 | 0.03      | Down | -2.6  | 0.06      |      | -1.48 | 0.13  |      | Expressed protein                                                        |
| Pc_TC094476 | -4.09 | 0.02  | Down | -0.94 | 0.49      |      | -2.67 | 0.13      |      | -4.54 | 0.01  | Down | Expressed protein                                                        |
| Pc_TC094480 | 2.13  | 0     | Up   | 0     | 4.68E-006 |      | 1.8   | 0.09      |      | -0.02 | 1     |      | ribosomal protein S13A                                                   |
| Pc_TC094485 | 1.38  | 0.03  | Up   | 0.46  | 0.58      |      | -0.98 | 0.42      |      | 0.48  | 0.56  |      | Expressed protein                                                        |
| Pc_TC094490 | -1.92 | 0.01  | Down | 0.9   | 0.21      |      | -2.36 | 0.06      |      | -0.79 | 0.33  |      | Expressed protein                                                        |
| Pc_TC094494 | 0.04  | 0.99  |      | 0.93  | 0.27      |      | -3.27 | 0.03      | Down | -4.73 | 0     | Down | Expressed protein                                                        |
| Pc_TC094501 | 0.16  | 0.6   |      | 0.38  | 0.34      |      | -9.03 | 5.51E-014 | Down | -3.71 | ##### | Down | Expressed protein                                                        |
| Pc_TC094502 | 2.08  | 0.3   |      | 3.45  | 0.03      | Up   | 3.67  | 0.04      | Up   | 2.71  | 0.12  |      | Expressed protein                                                        |
| Pc_TC094505 | 0.45  | 0.46  |      | 0.97  | 0.16      |      | -3.4  | 0.01      | Down | -2.63 | 0     | Down | Expressed protein                                                        |
| Pc_TC094511 | 0.04  | 0.96  |      | 0.94  | 0.15      |      | -3.49 | 0         | Down | -2.36 | 0     | Down | Uncharacterized protein                                                  |
| Pc_TC094528 | -1    | 0.28  |      | -1.2  | 0.25      |      | 1.99  | 0.08      |      | 1.68  | 0.04  | Up   | Uncharacterized protein                                                  |
| Pc_TC094531 | 0.36  | 0.65  |      | 1.53  | 0.05      |      | -3.53 | 0.02      | Down | -1.21 | 0.21  |      | Expressed protein                                                        |
| Pc_TC094535 | -5.54 | ##### | Down | -0.03 | 1         |      | 1.1   | 0.33      |      | 0.08  | 0.95  |      | Expressed protein                                                        |
| Pc_TC094545 | 0.85  | 0.22  |      | 0.85  | 0.29      |      | -1.26 | 0.31      |      | -1.96 | 0.04  | Down | Expressed protein                                                        |
| Pc_TC094546 | -3.17 | ##### | Down | -2.19 | 0.01      | Down | 0.36  | 0.74      |      | -0.48 | 0.53  |      | cysteine-rich RLK (RECEPTOR-like protein kinase) 8                       |
| Pc_TC094549 | -2.96 | ##### | Down | -1.4  | 0.06      |      | -0.63 | 0.56      |      | -1.06 | 0.15  |      | Expressed protein                                                        |
| Pc_TC094550 | 2.4   | 0.01  | Up   | 3.23  | 0         | Up   | 3.22  | 0.02      | Up   | 2.24  | 0.04  | Up   | Uncharacterized protein (Fragment)                                       |
| Pc_TC094556 | -3.92 | 0.03  | Down | -2.36 | 0.15      |      | 0.36  | 0.83      |      | 0.33  | 0.81  |      | unknown protein                                                          |
| Pc_TC094564 | 0.2   | 0.73  |      | 0.4   | 0.55      |      | -3.16 | 0.01      | Down | -1.78 | 0.02  | Down | Expressed protein                                                        |
| Pc_TC094567 | 0.66  | 0.81  |      | 3.01  | 0.02      | Up   | 0.09  | 1         |      | 0.8   | 0.73  |      | Uncharacterized protein                                                  |
| Pc_TC094576 | 1.76  | 0.01  | Up   | 1.11  | 0.18      |      | -1.36 | 0.3       |      | -0.53 | 0.58  |      | Expressed protein                                                        |
| Pc_TC094586 | 0.01  | 1     |      | 1.01  | 0.13      |      | -4.03 | 0         | Down | -3.77 | ##### | Down | Expressed protein                                                        |
| Pc_TC094588 | -0.17 | 0.76  |      | 0.75  | 0.22      |      | -1.55 | 0.15      |      | -1.84 | 0.01  | Down | Expressed protein                                                        |

|             |       |       |      |       |           |      |       |           |      |       |       |      |                                                    |     |
|-------------|-------|-------|------|-------|-----------|------|-------|-----------|------|-------|-------|------|----------------------------------------------------|-----|
| Pc_TC094610 | 1.34  | 0.02  | Up   | 1.35  | 0.04      | Up   | -1.04 | 0.35      |      | 0.63  | 0.38  |      | Expressed protein                                  |     |
| Pc_TC094612 | 1.83  | 0.01  | Up   | 0     | 0         |      | 1.35  | 0.27      |      | 0.12  | 0.94  |      | Expressed protein                                  |     |
| Pc_TC094627 | -2.06 | 0.02  | Down | -0.76 | 0.41      |      | 0.23  | 0.85      |      | 0.03  | 1     |      | Expressed protein                                  |     |
| Pc_TC094631 | 0.46  | 0.28  |      | 1.02  | 0.05      | Up   | -4.59 | 6.70E-005 | Down | -1.65 | 0.01  | Down | Uncharacterized protein                            |     |
| Pc_TC094668 | -2.8  | 0.04  | Down | -1.59 | 0.22      |      | 0.97  | 0.45      |      | -0.66 | 0.57  |      | Expressed protein                                  |     |
| Pc_TC094670 | -0.6  | 0.58  |      | 0.8   | 0.42      |      | -2.76 | 0.09      |      | -2.64 | 0.04  | Down | Expressed protein                                  |     |
| Pc_TC094678 | 0.09  | 0.9   |      | 0.24  | 0.75      |      | -1.81 | 0.12      |      | -2.25 | 0.01  | Down | Expressed protein                                  |     |
| Pc_TC094688 | 0.33  | 0.71  |      | 1.06  | 0.23      |      | -3.13 | 0.05      | Down | -2.16 | 0.06  |      | Expressed protein                                  |     |
| Pc_TC094692 | 1.08  | 0.77  |      | 0.06  | 1         |      | 4.9   | 0         | Up   | 3.83  | 0.01  | Up   | Plasma-membrane choline transporter family protein |     |
| Pc_TC094704 | -0.23 | 0.7   |      | -0.09 | 0.91      |      | 2.33  | 0.02      | Up   | 1.05  | 0.12  |      | Expressed protein                                  |     |
| Pc_TC094706 | -0.37 | 0.67  |      | -0.54 | 0.58      |      | -0.64 | 0.62      |      | -2.27 | 0.03  | Down | Expressed protein                                  |     |
| Pc_TC094709 | -0.93 | 0.09  |      | -1.4  | 0.04      | Down | 1.16  | 0.23      |      | -0.99 | 0.15  |      | Expressed protein                                  |     |
| Pc_TC094710 | 0.08  | 0.97  |      | -0.25 | 0.83      |      | -4.45 | 0.01      | Down | -1.24 | 0.24  |      | Uncharacterized protein                            |     |
| Pc_TC094713 | -1.36 | 0.07  |      | -2.22 | 0.02      | Down | -1.36 | 0.25      |      | -1.71 | 0.05  |      | Expressed protein                                  |     |
| Pc_TC094714 | -3.17 | 0.04  | Down | -1.6  | 0.25      |      | -2.42 | 0.15      |      | -3.62 | 0.02  | Down | Expressed protein                                  |     |
| Pc_TC094716 | 2.06  | 0.01  | Up   | 0     | 0.01      |      | 1.98  | 0.11      |      | 0.99  | 0.32  |      | Expressed protein                                  |     |
| Pc_TC094719 | -0.62 | 0.55  |      | -0.47 | 0.69      |      | -4.2  | 0.02      | Down | -2.49 | 0.04  | Down | Uncharacterized protein                            |     |
| Pc_TC094730 | 0.07  | 0.91  |      | 0.35  | 0.57      |      | -2.91 | 0.01      | Down | -2.25 | 0     | Down | protein phosphatase 2A-4                           |     |
| Pc_TC094749 | -0.97 | 0.33  |      | -0.34 | 0.77      |      | 2.3   | 0.05      | Up   | 1.32  | 0.13  |      | Expressed protein                                  |     |
| Pc_TC094753 | 2.11  | ##### | Up   | 0     | 4.57E-020 |      | 2.35  | 0.01      | Up   | 0.51  | 0.37  |      | Expressed protein                                  |     |
| Pc_TC094760 | 0.3   | 0.77  |      | 1.12  | 0.23      |      | -3.5  | 0.04      | Down | -2.96 | 0.03  | Down | Expressed protein                                  |     |
| Pc_TC094768 | -0.15 | 0.81  |      | 0.56  | 0.42      |      | -3.33 | 0.01      | Down | 0.12  | 0.88  |      | Expressed protein                                  |     |
| Pc_TC094785 | 0.17  | 0.76  |      | -0.43 | 0.52      |      | 1.24  | 0.21      |      | 1.74  | 0.01  | Up   | Expressed protein                                  |     |
| Pc_TC094788 | -0.6  | 0.43  |      | -0.38 | 0.67      |      | -1.22 | 0.32      |      | -2.72 | 0.01  | Down | cDNA clone: J065174 21 full insert sequence        |     |
| Pc_TC094795 | 0.84  | 0.2   |      | 1.33  | 0.07      |      | -3.13 | 0.02      | Down | -2.24 | 0.02  | Down | Expressed protein                                  |     |
| Pc_TC094801 | -0.19 | 0.82  |      | -1.21 | 0.2       |      | -3.05 | 0.03      | Down | -2.2  | 0.02  | Down | Expressed protein                                  |     |
| Pc_TC094808 | 1.85  | 0     | Up   | 0     | 0         |      | 1.39  | 0.22      |      | -1.01 | 0.29  |      | Expressed protein                                  |     |
| Pc_TC094815 | 0.82  | 0.47  |      | 0.93  | 0.45      |      | 1.47  | 0.29      |      | 2.02  | 0.04  | Up   | Expressed protein                                  |     |
| Pc_TC094817 | 0.29  | 0.49  |      | 0.36  | 0.49      |      | -0.91 | 0.34      |      | -1.3  | 0.04  | Down | Expressed protein                                  |     |
| Pc_TC094826 | 1.25  | 0.02  | Up   | -7.04 | 2.60E-008 | Down | 1.14  | 0.26      |      | 0.38  | 0.59  |      | LIM domain-containing protein                      | LIM |
| Pc_TC094828 | 0.44  | 0.45  |      | -0.4  | 0.58      |      | -2.5  | 0.03      | Down | -1.47 | 0.06  |      | Expressed protein                                  |     |
| Pc_TC094833 | 1     | 0     |      | -0.79 | 0.07      |      | 1     | 0.23      |      | 2.05  | ##### | Up   | Expressed protein                                  |     |
| Pc_TC094850 | 0.07  | 0.9   |      | -0.23 | 0.72      |      | -2.06 | 0.06      |      | -1.47 | 0.04  | Down | Uncharacterized protein                            |     |
| Pc_TC094853 | -1.29 | 0.02  | Down | -1.28 | 0.05      |      | 1.29  | 0.18      |      | -0.37 | 0.58  |      | Uncharacterized protein                            |     |
| Pc_TC094860 | -1.85 | 0.15  |      | -1.02 | 0.45      |      | -2.74 | 0.11      |      | -3.62 | 0.02  | Down | Expressed protein                                  |     |
| Pc_TC094865 | 5.12  | ##### | Up   | 0     | 0.07      |      | 2.85  | 0.03      | Up   | 0.3   | 0.88  |      | Expressed protein                                  |     |
| Pc_TC094866 | -0.06 | 0.93  |      | 0.26  | 0.71      |      | -2.79 | 0.02      | Down | -1.42 | 0.06  |      | Expressed protein                                  |     |
| Pc_TC094867 | -0.24 | 0.82  |      | -0.53 | 0.64      |      | -1.94 | 0.18      |      | -3.28 | 0.01  | Down | Expressed protein                                  |     |
| Pc_TC094880 | 0.2   | 0.73  |      | 1.45  | 0.02      | Up   | -1.8  | 0.11      |      | -1.63 | 0.03  | Down | DNA/RNA polymerases superfamily protein            |     |
| Pc_TC094885 | 0.28  | 0.51  |      | 0.05  | 0.92      |      | -1.7  | 0.08      |      | -1.61 | 0.01  | Down | Expressed protein                                  |     |
| Pc_TC094898 | 1.34  | 0.37  |      | 3.09  | 0.01      | Up   | -2.82 | 0.37      |      | 2.43  | 0.05  |      | Expressed protein                                  |     |
| Pc_TC094909 | 0.05  | 0.98  |      | 0.83  | 0.31      |      | -5.05 | 0         | Down | -2.93 | 0.01  | Down | Expressed protein                                  |     |
| Pc_TC094910 | 1.28  | 0.04  | Up   | 0     | 2.23E-006 |      | 0.64  | 0.57      |      | 0.26  | 0.75  |      | Retrovirus-related Pol polyprotein LINE-1          |     |
| Pc_TC094913 | 0.38  | 0.46  |      | 0.64  | 0.29      |      | -2.31 | 0.03      | Down | -0.85 | 0.21  |      | Expressed protein                                  |     |
| Pc_TC094919 | -0.73 | 0.37  |      | 0.49  | 0.57      |      | -1.3  | 0.3       |      | -1.99 | 0.04  | Down | Expressed protein                                  |     |
| Pc_TC094926 | -0.02 | 0.99  |      | 0.79  | 0.23      |      | -2.18 | 0.06      |      | -1.52 | 0.05  | Down | Expressed protein                                  |     |
| Pc_TC094932 | -0.03 | 1     |      | 0.91  | 0.28      |      | -2.82 | 0.05      | Down | -0.74 | 0.44  |      | putative mutator sub-class                         |     |
| Pc_TC094939 | 0.41  | 0.51  |      | 0.71  | 0.32      |      | -3.44 | 0.01      | Down | -0.88 | 0.27  |      | Expressed protein                                  |     |
| Pc_TC094945 | 1.08  | 0.47  |      | 3.56  | 0         | Up   | 0     | 0.14      |      | -1.96 | 0.4   |      | Expressed protein                                  |     |
| Pc_TC094947 | -0.15 | 0.83  |      | 0.7   | 0.32      |      | -6.17 | 9.11E-005 | Down | -2.65 | 0     | Down | Expressed protein                                  |     |
| Pc_TC094955 | -0.22 | 0.78  |      | 0.32  | 0.69      |      | -3.91 | 0.01      | Down | -1.57 | 0.08  |      | Expressed protein                                  |     |
| Pc_TC094960 | 1.89  | ##### | Up   | 0     | 2.27E-015 |      | 2.44  | 0.01      | Up   | 0.77  | 0.2   |      | Glycosyl hydrolases family 32 protein              |     |
| Pc_TC094965 | -2.28 | 0     | Down | -1.09 | 0.14      |      | 1.47  | 0.15      |      | 0.51  | 0.46  |      | Putative uncharacterized protein                   |     |
| Pc_TC094966 | -4.24 | 0.01  | Down | -3.26 | 0.05      | Down | 1.47  | 0.25      |      | -1.24 | 0.31  |      | Expressed protein                                  |     |
| Pc_TC094972 | -1.73 | 0.24  |      | -1.43 | 0.37      |      | -0.4  | 0.84      |      | -4.18 | 0.03  | Down | Expressed protein                                  |     |
| Pc_TC094975 | -0.55 | 0.57  |      | -0.9  | 0.41      |      | -0.2  | 0.9       |      | -2.33 | 0.04  | Down | Expressed protein                                  |     |
| Pc_TC094976 | -0.33 | 0.59  |      | -0.49 | 0.5       |      | 1.65  | 0.11      |      | 1.34  | 0.05  | Up   | Expressed protein                                  |     |
| Pc_TC094995 | -4.57 | 0     | Down | 0.06  | 1         |      | 0.79  | 0.54      |      | 0.34  | 0.75  |      | cysteine-rich RLK (RECEPTOR-like protein kinase) 8 |     |
| Pc_TC095003 | 0.55  | 0.39  |      | -0.05 | 0.96      |      | -2.65 | 0.04      | Down | -2.24 | 0.01  | Down | Expressed protein                                  |     |
| Pc_TC095043 | -2.61 | 0     | Down | -1.55 | 0.1       |      | 1.15  | 0.3       |      | 0.4   | 0.63  |      | Expressed protein                                  |     |
| Pc_TC095047 | -0.35 | 0.66  |      | 0.92  | 0.24      |      | -2.79 | 0.04      | Down | -0.88 | 0.32  |      | Expressed protein                                  |     |
| Pc_TC095058 | 0     | 0.04  |      | 0     | 0.05      |      | 3.25  | 0.01      | Up   | 1.25  | 0.27  |      | Expressed protein                                  |     |

|             |       |       |      |       |           |      |       |           |      |       |       |      |                                                                      |
|-------------|-------|-------|------|-------|-----------|------|-------|-----------|------|-------|-------|------|----------------------------------------------------------------------|
| Pc_TC095078 | -1.11 | 0.05  | Down | -1.09 | 0.1       |      | 0.64  | 0.52      |      | -0.11 | 0.87  |      | Putative uncharacterized protein                                     |
| Pc_TC095083 | -2.1  | 0.01  | Down | -0.87 | 0.33      |      | 1.1   | 0.32      |      | 0.15  | 0.87  |      | Expressed protein                                                    |
| Pc_TC095087 | -0.06 | 0.94  |      | -0.59 | 0.43      |      | -2.3  | 0.05      | Down | -0.45 | 0.55  |      | Expressed protein                                                    |
| Pc_TC095125 | -0.65 | 0.36  |      | -0.3  | 0.72      |      | -0.74 | 0.52      |      | -1.8  | 0.04  | Down | Expressed protein                                                    |
| Pc_TC095127 | -0.59 | 0.38  |      | 1.37  | 0.04      | Up   | 0.66  | 0.54      |      | 0.43  | 0.56  |      | Expressed protein                                                    |
| Pc_TC095137 | 1.51  | 0.01  | Up   | 0     | 2.52E-006 |      | 1.3   | 0.23      |      | -0.28 | 0.75  |      | vacuolar H <sup>+</sup> -pumping ATPase 16 kDa proteolipid subunit 4 |
| Pc_TC095141 | 0.93  | 0.05  |      | 0.76  | 0.19      |      | -1.69 | 0.11      |      | 1.45  | 0.02  | Up   | OSJNBa0029C0.4.5 protein                                             |
| Pc_TC095151 | 0.28  | 0.71  |      | 1.29  | 0.09      |      | -1.55 | 0.22      |      | -2.32 | 0.02  | Down | Expressed protein                                                    |
| Pc_TC095153 | 0.42  | 0.56  |      | 0.85  | 0.27      |      | -3.52 | 0.01      | Down | -2.04 | 0.03  | Down | Expressed protein                                                    |
| Pc_TC095158 | 0.31  | 0.65  |      | 1.71  | 0.01      | Up   | -1.5  | 0.22      |      | -1.07 | 0.21  |      | Expressed protein                                                    |
| Pc_TC095172 | 0.56  | 0.44  |      | 0.65  | 0.43      |      | 0.65  | 0.57      |      | 1.78  | 0.02  | Up   | Expressed protein                                                    |
| Pc_TC095173 | -1.66 | 0.11  |      | -2.04 | 0.09      |      | -0.16 | 0.93      |      | -3.28 | 0.01  | Down | Expressed protein                                                    |
| Pc_TC095176 | -0.61 | 0.29  |      | -0.18 | 0.79      |      | -3.42 | 0         | Down | -0.16 | 0.82  |      | E3 ubiquitin ligase,putative                                         |
| Pc_TC095179 | -1.27 | 0.01  | Down | -0.91 | 0.12      |      | 0.11  | 0.91      |      | 0.28  | 0.64  |      | E3 ubiquitin ligase,putative                                         |
| Pc_TC095180 | 1.2   | 0     | Up   | 0.26  | 0.65      |      | 0.23  | 0.81      |      | -0.49 | 0.43  |      | E3 ubiquitin ligase,putative                                         |
| Pc_TC095218 | 0.95  | 0.05  |      | 0.37  | 0.56      |      | 0.1   | 0.93      |      | 1.25  | 0.05  | Up   | Expressed protein                                                    |
| Pc_TC095243 | -0.03 | 1     |      | 0.44  | 0.6       |      | -3.5  | 0.01      | Down | -1.66 | 0.07  |      | Expressed protein                                                    |
| Pc_TC095245 | -0.97 | 0.31  |      | -2.18 | 0.07      |      | -0.41 | 0.76      |      | -3.83 | 0     | Down | Expressed protein                                                    |
| Pc_TC095257 | -0.14 | 0.87  |      | -0.07 | 0.95      |      | -1.63 | 0.19      |      | -3.04 | 0     | Down | Expressed protein                                                    |
| Pc_TC095262 | -1.31 | 0.26  |      | -3.33 | 0.04      | Down | 0.99  | 0.45      |      | -0.01 | 1     |      | Expressed protein                                                    |
| Pc_TC095268 | 2.79  | ##### | Up   | 0     | 0         |      | 2.86  | 0.01      | Up   | 2.11  | 0.01  | Up   | Expressed protein                                                    |
| Pc_TC095279 | 0.04  | 0.97  |      | 0.46  | 0.52      |      | -3.72 | 0         | Down | -1.51 | 0.06  |      | Expressed protein                                                    |
| Pc_TC095287 | 0.54  | 0.42  |      | 0.72  | 0.34      |      | -3.24 | 0.02      | Down | -1.53 | 0.08  |      | Expressed protein                                                    |
| Pc_TC095293 | -2.14 | 0.03  | Down | -1.25 | 0.22      |      | -0.27 | 0.84      |      | -0.77 | 0.42  |      | Expressed protein                                                    |
| Pc_TC095295 | -0.44 | 0.51  |      | 1.47  | 0.03      | Up   | 1.26  | 0.23      |      | 1.07  | 0.13  |      | Expressed protein                                                    |
| Pc_TC095304 | -1.73 | 0.04  | Down | -1.43 | 0.13      |      | 0.55  | 0.63      |      | -0.63 | 0.47  |      | sodium hydrogen exchanger 2                                          |
| Pc_TC095325 | 2.14  | ##### | Up   | 0     | 1.06E-012 |      | 1.92  | 0.04      | Up   | 1.07  | 0.09  |      | apocytochrome b                                                      |
| Pc_TC095327 | -1.21 | 0.29  |      | -3.4  | 0.03      | Down | -0.87 | 0.56      |      | -0.25 | 0.85  |      | Expressed protein                                                    |
| Pc_TC095342 | -3.09 | 0.04  | Down | -1.79 | 0.22      |      | 0.42  | 0.79      |      | -4.54 | 0.01  | Down | Putative uncharacterized protein                                     |
| Pc_TC095343 | -5.26 | ##### | Down | -3.96 | 0         | Down | -1.67 | 0.16      |      | -4.13 | ##### | Down | Putative uncharacterized protein                                     |
| Pc_TC095347 | 0.17  | 0.8   |      | 0.19  | 0.8       |      | 0     | 4.60E-006 |      | -3.01 | 0     | Down | Expressed protein                                                    |
| Pc_TC095352 | 0.26  | 0.87  |      | -0.15 | 0.97      |      | -4.4  | 0.05      | Down | 0     | 0.01  |      | Expressed protein                                                    |
| Pc_TC095354 | -1.36 | 0.27  |      | -0.6  | 0.65      |      | -3.74 | 0.05      | Down | -2.3  | 0.09  |      | Expressed protein                                                    |
| Pc_TC095362 | -0.23 | 0.58  |      | -1.15 | 0.03      | Down | 1.34  | 0.13      |      | 0.5   | 0.37  |      | Expressed protein                                                    |
| Pc_TC095366 | -0.16 | 0.79  |      | 0.06  | 0.94      |      | -1.03 | 0.34      |      | -1.55 | 0.04  | Down | Expressed protein                                                    |
| Pc_TC095371 | -2.03 | 0.03  | Down | -0.67 | 0.49      |      | -0.43 | 0.74      |      | -0.71 | 0.45  |      | Expressed protein                                                    |
| Pc_TC095388 | -0.2  | 0.89  |      | -2.88 | 0.05      | Down | -4.02 | 0.03      | Down | -2.09 | 0.09  |      | Expressed protein                                                    |
| Pc_TC095390 | -0.17 | 0.93  |      | 0     | 0.01      |      | -0.35 | 0.84      |      | -3.62 | 0.02  | Down | Expressed protein                                                    |
| Pc_TC095391 | -1.45 | 0.18  |      | 0     | 0         |      | -2.03 | 0.18      |      | -4.08 | 0.01  | Down | Expressed protein                                                    |
| Pc_TC095398 | 0.04  | 0.96  |      | 0.13  | 0.86      |      | -2.96 | 0.01      | Down | -1.55 | 0.04  | Down | Expressed protein                                                    |
| Pc_TC095415 | -3.31 | 0.02  | Down | 0.25  | 0.85      |      | -1.57 | 0.31      |      | -1.77 | 0.16  |      | Expressed protein                                                    |
| Pc_TC095416 | -1.51 | 0.14  |      | -1.85 | 0.12      |      | 3.44  | 0         | Up   | 2.04  | 0.01  | Up   | Putative uncharacterized protein                                     |
| Pc_TC095424 | 3.9   | ##### | Up   | 0     | 0.02      |      | 0.45  | 0.79      |      | -1.37 | 0.34  |      | Expressed protein                                                    |
| Pc_TC095425 | -3.57 | 0.01  | Down | -1.59 | 0.2       |      | -0.89 | 0.53      |      | -1.11 | 0.32  |      | Expressed protein                                                    |
| Pc_TC095438 | -0.03 | 1     |      | 0.39  | 0.71      |      | -3.67 | 0.03      | Down | -0.37 | 0.74  |      | Putative reverse transcriptase                                       |
| Pc_TC095442 | 4.47  | 0.01  | Up   | 0     | 1         |      | 1.83  | 0.66      |      | 2.21  | 0.47  |      | Expressed protein                                                    |
| Pc_TC095443 | -1.24 | 0.37  |      | -1.26 | 0.4       |      | -4.4  | 0.05      | Down | -1.7  | 0.23  |      | Expressed protein                                                    |
| Pc_TC095448 | 3.18  | 0     | Up   | 0     | 0.27      |      | 2.7   | 0.08      |      | 0.76  | 0.7   |      | Expressed protein                                                    |
| Pc_TC095456 | 1.46  | 0.01  | Up   | 0.66  | 0.38      |      | 1.04  | 0.34      |      | 1.01  | 0.17  |      | Expressed protein                                                    |
| Pc_TC095463 | -0.47 | 0.4   |      | -1.66 | 0.02      | Down | 0.67  | 0.51      |      | 0.15  | 0.83  |      | Expressed protein                                                    |
| Pc_TC095469 | -0.1  | 0.91  |      | -0.64 | 0.47      |      | 2.52  | 0.02      | Up   | 1.2   | 0.11  |      | Expressed protein                                                    |
| Pc_TC095473 | 0.12  | 0.82  |      | 1.09  | 0.06      |      | -5.81 | 1.51E-005 | Down | -3.37 | ##### | Down | Expressed protein                                                    |
| Pc_TC095474 | -1.24 | 0.67  |      | -2.26 | 0.5       |      | 3.66  | 0.01      | Up   | 2     | 0.13  |      | Expressed protein                                                    |
| Pc_TC095478 | -0.11 | 0.94  |      | -0.4  | 0.71      |      | -2.08 | 0.14      |      | -2.61 | 0.02  | Down | Expressed protein                                                    |
| Pc_TC095479 | -0.74 | 0.5   |      | 0.23  | 0.86      |      | -4.02 | 0.03      | Down | -1.9  | 0.12  |      | Os05g0588700 protein                                                 |
| Pc_TC095488 | -0.54 | 0.63  |      | -0.01 | 1         |      | -4.02 | 0.03      | Down | -2.9  | 0.03  | Down | Fibroin heavy chain (Fragment)                                       |
| Pc_TC095489 | -1.57 | 0.03  | Down | 0     | 9.45E-008 |      | 0.41  | 0.71      |      | -0.73 | 0.35  |      | Uncharacterized protein                                              |
| Pc_TC095494 | -0.16 | 0.89  |      | -0.74 | 0.49      |      | 2.6   | 0.02      | Up   | 0.73  | 0.41  |      | Putative uncharacterized protein P0007F06.35-1                       |
| Pc_TC095505 | -1.2  | 0.35  |      | -0.44 | 0.77      |      | -4.58 | 0.03      | Down | -3.46 | 0.03  | Down | Expressed protein                                                    |
| Pc_TC095515 | 1.54  | 0.34  |      | 2.76  | 0.04      | Up   | 0     | 0.26      |      | 0.95  | 0.64  |      | ETHYLENE-INSENSITIVE3-like 1                                         |
| Pc_TC095516 | 0.04  | 1     |      | 0.43  | 0.64      |      | 0     | 0         |      | -3.26 | 0.01  | Down | ETHYLENE-INSENSITIVE3-like 1                                         |
| Pc_TC095517 | 0.43  | 0.28  |      | 0.56  | 0.25      |      | -5.2  | 5.31E-006 | Down | -2.9  | ##### | Down | ETHYLENE-INSENSITIVE3-like 1                                         |

|             |       |      |      |       |           |      |       |           |      |       |      |      |                                                 |
|-------------|-------|------|------|-------|-----------|------|-------|-----------|------|-------|------|------|-------------------------------------------------|
| Pc_TC095536 | -3.06 | 0    | Down | -0.24 | 0.8       |      | 0.28  | 0.82      |      | -0.13 | 0.9  |      | Uncharacterized protein                         |
| Pc_TC095547 | 0.67  | 0.18 |      | -1.93 | 0.01      | Down | 0.49  | 0.62      |      | 1.9   | 0    | Up   | Expressed protein                               |
| Pc_TC095578 | -0.51 | 0.55 |      | -2.11 | 0.05      | Down | 2.23  | 0.04      | Up   | 1.3   | 0.1  |      | Expressed protein                               |
| Pc_TC095586 | -1.09 | 0.55 |      | -0.53 | 0.82      |      | 2.79  | 0.04      | Up   | 0.63  | 0.67 |      | Expressed protein                               |
| Pc_TC095598 | -1.34 | 0.32 |      | 0.81  | 0.47      |      | -2.17 | 0.21      |      | -3.37 | 0.04 | Down | Expressed protein                               |
| Pc_TC095601 | -0.62 | 0.68 |      | -2.06 | 0.24      |      | 2.91  | 0.02      | Up   | 1.54  | 0.14 |      | Expressed protein                               |
| Pc_TC095605 | -0.73 | 0.47 |      | -0.84 | 0.46      |      | 0     | 0         |      | -2.6  | 0.03 | Down | Expressed protein                               |
| Pc_TC095610 | 0.38  | 0.56 |      | 1.03  | 0.15      |      | -2.55 | 0.04      | Down | -0.87 | 0.28 |      | Expressed protein                               |
| Pc_TC095619 | 2.25  | 0.05 | Up   | 0.64  | 0.76      |      | -0.08 | 1         |      | 0.95  | 0.55 |      | Expressed protein                               |
| Pc_TC095635 | -2.58 | 0.01 | Down | -3.6  | 0.01      | Down | -4.16 | 0.01      | Down | -4.62 | 0    | Down | Uncharacterized protein                         |
| Pc_TC095644 | 1.99  | 0    | Up   | 0     | 0         |      | 1.37  | 0.25      |      | -0.02 | 1    |      | 6-phosphogluconate dehydrogenase family protein |
| Pc_TC095652 | -1.35 | 0.06 |      | -1.74 | 0.04      | Down | 1.17  | 0.27      |      | 0.3   | 0.69 |      | Expressed protein                               |
| Pc_TC095655 | 0.51  | 0.47 |      | 0.63  | 0.43      |      | -3.28 | 0.02      | Down | -1.7  | 0.07 |      | Expressed protein                               |
| Pc_TC095656 | -0.3  | 0.73 |      | -0.32 | 0.75      |      | 2.22  | 0.05      | Up   | 0.59  | 0.49 |      | UniRef100                                       |
| Pc_TC095662 | -0.33 | 0.69 |      | 0.84  | 0.3       |      | -4.11 | 0.01      | Down | -1.82 | 0.06 |      | Putative uncharacterized protein                |
| Pc_TC095670 | 0.42  | 0.47 |      | 0.9   | 0.17      |      | -2.43 | 0.04      | Down | -1.21 | 0.11 |      | Expressed protein                               |
| Pc_TC095675 | 1.5   | 0.04 | Up   | 1.69  | 0.05      | Up   | 0.25  | 0.87      |      | 1.48  | 0.09 |      | Expressed protein                               |
| Pc_TC095683 | 2.4   | 0.01 | Up   | 2.78  | 0.01      | Up   | 1.09  | 0.48      |      | 2.75  | 0.01 | Up   | Uncharacterized protein (Fragment)              |
| Pc_TC095686 | -0.13 | 0.78 |      | -0.1  | 0.87      |      | 1.24  | 0.18      |      | 1.17  | 0.04 | Up   | Expressed protein                               |
| Pc_TC095689 | 0.17  | 0.88 |      | 0.56  | 0.57      |      | -3.03 | 0.05      |      | -5.23 | 0    | Down | Expressed protein                               |
| Pc_TC095690 | -0.34 | 0.65 |      | -1.02 | 0.23      |      | 2.15  | 0.04      | Up   | 1.38  | 0.06 |      | Expressed protein                               |
| Pc_TC095697 | -1.46 | 0.06 |      | -1.94 | 0.04      | Down | 0.93  | 0.4       |      | -0.29 | 0.74 |      | Expressed protein                               |
| Pc_TC095698 | -0.59 | 0.46 |      | 0.83  | 0.3       |      | -4.67 | 0         | Down | -1.81 | 0.06 |      | Expressed protein                               |
| Pc_TC095710 | -2.12 | 0    | Down | -3.64 | 9.64E-006 | Down | 3.37  | 0         | Up   | 1.88  | 0    | Up   | Uncharacterized protein                         |
| Pc_TC095711 | -0.08 | 0.92 |      | 0.73  | 0.3       |      | 0     | 1.02E-005 |      | -3.15 | 0    | Down | Expressed protein                               |
| Pc_TC095717 | -1.58 | 0.03 | Down | -2.47 | 0         | Down | 0.05  | 0.97      |      | -0.67 | 0.39 |      | DNA-directed RNA polymerase family protein      |
| Pc_TC095725 | 0.37  | 0.56 |      | 0.8   | 0.25      |      | -4.32 | 0         | Down | -1.51 | 0.06 |      | Expressed protein                               |
| Pc_TC095731 | 0.16  | 0.79 |      | 0.83  | 0.21      |      | -2.78 | 0.02      | Down | -2.42 | 0    | Down | Expressed protein                               |
| Pc_TC095744 | 1.94  | 0.04 | Up   | 0.92  | 0.47      |      | -0.26 | 0.93      |      | -0.25 | 0.92 |      | Expressed protein                               |
| Pc_TC095780 | -4.01 | 0.02 | Down | -0.86 | 0.54      |      | -3    | 0.1       |      | -3.46 | 0.03 | Down | Uncharacterized protein                         |
| Pc_TC095784 | 0.66  | 0.66 |      | 2.38  | 0.03      | Up   | 0     | 0.08      |      | -2.37 | 0.25 |      | Expressed protein                               |
| Pc_TC095787 | -1.36 | 0.02 | Down | -0.99 | 0.15      |      | -1.56 | 0.14      |      | -2.43 | 0    | Down | limit dextrinase                                |
| Pc_TC095788 | -0.09 | 0.89 |      | 0.05  | 0.95      |      | -1.42 | 0.19      |      | -2.04 | 0.01 | Down | limit dextrinase                                |
| Pc_TC095799 | 0.58  | 0.34 |      | 0.19  | 0.81      |      | 0.7   | 0.51      |      | 1.57  | 0.02 | Up   | Expressed protein                               |
| Pc_TC095825 | -1.28 | 0.11 |      | -2.65 | 0.01      | Down | 1.02  | 0.36      |      | 0.17  | 0.85 |      | Expressed protein                               |
| Pc_TC095831 | 1.46  | 0    | Up   | 0     | 4.76E-013 |      | 1.49  | 0.12      |      | -0.11 | 0.87 |      | Expressed protein                               |
| Pc_TC095852 | -1.52 | 0.04 | Down | 0.48  | 0.52      |      | 0     | 1         |      | -1.06 | 0.2  |      | Expressed protein                               |
| Pc_TC095858 | 1.64  | 0.04 | Up   | 1.13  | 0.25      |      | -0.13 | 0.96      |      | 0.93  | 0.34 |      | Expressed protein                               |
| Pc_TC095860 | 0.59  | 0.25 |      | 1.46  | 0.01      | Up   | -1.96 | 0.07      |      | -1.1  | 0.12 |      | Expressed protein                               |
| Pc_TC095869 | 0.94  | 0.17 |      | 2.25  | 0         | Up   | -2.2  | 0.1       |      | -1.53 | 0.11 |      | Expressed protein                               |
| Pc_TC095884 | -0.82 | 0.3  |      | 0.23  | 0.8       |      | -0.97 | 0.43      |      | -1.96 | 0.04 | Down | Expressed protein                               |
| Pc_TC095887 | 0     | 1    |      | -1.91 | 0.03      | Down | -1.63 | 0.16      |      | -1.74 | 0.04 | Down | Expressed protein                               |
| Pc_TC095888 | 0.98  | 0.18 |      | 2.03  | 0.01      | Up   | 0.75  | 0.53      |      | 1.49  | 0.06 |      | Expressed protein                               |
| Pc_TC095895 | 0.43  | 0.55 |      | 1.08  | 0.16      |      | -3.67 | 0.01      | Down | -0.58 | 0.52 |      | Expressed protein                               |
| Pc_TC095904 | 0.45  | 0.41 |      | 0.63  | 0.34      |      | -3.6  | 0         | Down | -1.35 | 0.07 |      | Uncharacterized protein                         |
| Pc_TC095905 | 0     | 0.31 |      | 0.87  | 0.72      |      | 4.37  | 0         | Up   | 2.83  | 0.03 | Up   | Expressed protein                               |
| Pc_TC095913 | -1.88 | 0.02 | Down | -1.14 | 0.2       |      | 0.29  | 0.81      |      | -0.26 | 0.76 |      | Expressed protein                               |
| Pc_TC095917 | -0.42 | 0.45 |      | -1.57 | 0.03      | Down | 1.12  | 0.26      |      | 0.44  | 0.51 |      | Expressed protein                               |
| Pc_TC095922 | 0.03  | 0.96 |      | -0.92 | 0.13      |      | 1.9   | 0.04      | Up   | 1.1   | 0.06 |      | Expressed protein                               |
| Pc_TC095925 | 0.73  | 0.26 |      | 1.44  | 0.04      | Up   | -2.42 | 0.05      |      | -0.09 | 0.93 |      | Expressed protein                               |
| Pc_TC095936 | -2.41 | 0.04 | Down | -3.16 | 0.02      | Down | 0.12  | 0.95      |      | -0.66 | 0.54 |      | Expressed protein                               |
| Pc_TC095943 | 1.12  | 0.01 | Up   | 0.24  | 0.69      |      | -1.77 | 0.09      |      | 0.64  | 0.3  |      | Expressed protein                               |
| Pc_TC095947 | 0.2   | 0.79 |      | 1.43  | 0.04      | Up   | -4.63 | 0         | Down | -1.8  | 0.04 | Down | Expressed protein                               |
| Pc_TC095949 | -0.26 | 0.78 |      | -0.1  | 0.94      |      | -1.5  | 0.26      |      | -2.3  | 0.03 | Down | Uncharacterized protein                         |
| Pc_TC095966 | -4.48 | 0    | Down | 0.91  | 0.26      |      | -1.05 | 0.4       |      | -0.61 | 0.51 |      | ARM repeat superfamily protein                  |
| Pc_TC095982 | -0.53 | 0.56 |      | -0.19 | 0.87      |      | -3.74 | 0.02      | Down | -3.04 | 0.01 | Down | Expressed protein                               |
| Pc_TC095984 | 0.04  | 0.96 |      | 0.51  | 0.43      |      | -4.26 | 0         | Down | -2.35 | 0    | Down | Expressed protein                               |
| Pc_TC095987 | 0.32  | 0.63 |      | 0.31  | 0.69      |      | -2.41 | 0.05      |      | -2.66 | 0    | Down | Expressed protein                               |
| Pc_TC096000 | -1.27 | 0.08 |      | -2.1  | 0.02      | Down | 1.78  | 0.09      |      | 0.71  | 0.33 |      | Expressed protein                               |
| Pc_TC096007 | -0.43 | 0.27 |      | -1.14 | 0.03      | Down | 1.74  | 0.04      | Up   | 1.01  | 0.06 |      | Expressed protein                               |
| Pc_TC096013 | 0.32  | 0.74 |      | -0.45 | 0.7       |      | -0.67 | 0.64      |      | -3.13 | 0.02 | Down | Expressed protein                               |
| Pc_TC096016 | 0.49  | 0.49 |      | 1.5   | 0.04      | Up   | -0.28 | 0.82      |      | -0.87 | 0.33 |      | Uncharacterized protein                         |

|             |       |       |      |       |           |      |       |           |      |       |       |      |                                                               |             |
|-------------|-------|-------|------|-------|-----------|------|-------|-----------|------|-------|-------|------|---------------------------------------------------------------|-------------|
| Pc_TC096052 | 0.19  | 0.82  |      | 0.2   | 0.84      |      | -2.79 | 0.04      | Down | -1.82 | 0.06  |      | Uncharacterized protein                                       |             |
| Pc_TC096057 | 0.66  | 0.34  |      | 0.91  | 0.25      |      | -3.39 | 0.02      | Down | -1.62 | 0.09  |      | Transposon protein,putative,Pong sub-class                    |             |
| Pc_TC096063 | -0.47 | 0.6   |      | 1.35  | 0.1       |      | -4.74 | 0.01      | Down | -3.62 | 0     | Down | Expressed protein                                             |             |
| Pc_TC096074 | 0.24  | 0.87  |      | -1.22 | 0.39      |      | -0.58 | 0.72      |      | -3.46 | 0.03  | Down | Mitochondrial transcription termination factor-like family-1  |             |
| Pc_TC096088 | 0.3   | 0.68  |      | 0.88  | 0.25      |      | -2.6  | 0.05      | Down | -1.58 | 0.08  |      | Expressed protein                                             |             |
| Pc_TC096116 | -0.57 | 0.42  |      | 1.28  | 0.07      |      | -2.24 | 0.07      |      | -2.83 | 0     | Down | Uncharacterized protein                                       |             |
| Pc_TC096120 | -0.56 | 0.47  |      | 0.88  | 0.26      |      | -1.21 | 0.32      |      | -3.26 | 0     | Down | Expressed protein                                             |             |
| Pc_TC096126 | 2.19  | 0     | Up   | 0     | 0         |      | 1.56  | 0.2       |      | 0.28  | 0.8   |      | Ribosomal protein L35Ae family protein                        |             |
| Pc_TC096129 | 0.57  | 0.42  |      | 0.66  | 0.41      |      | -4.25 | 0         | Down | -2.54 | 0.01  | Down | Expressed protein                                             | TPR         |
| Pc_TC096131 | 1.62  | 0.03  | Up   | 0     | 0         |      | 0.67  | 0.61      |      | -0.37 | 0.75  |      | Expressed protein                                             |             |
| Pc_TC096132 | 1.07  | 0.04  | Up   | 1.99  | 0         | Up   | -0.03 | 0.98      |      | 0.15  | 0.84  |      | Expressed protein                                             |             |
| Pc_TC096146 | 0.57  | 0.25  |      | 0.53  | 0.38      |      | 0.29  | 0.78      |      | 1.32  | 0.03  | Up   | NB-ARC domain-containing disease resistance protein           |             |
| Pc_TC096149 | 0.48  | 0.13  |      | 1.03  | 0.01      | Up   | -4.41 | 6.12E-006 | Down | -1.88 | 0     | Down | Anamorsin homolog                                             |             |
| Pc_TC096150 | -1.31 | 0.26  |      | -3.33 | 0.04      | Down | -2.3  | 0.15      |      | -4.77 | 0.01  | Down | Expressed protein                                             |             |
| Pc_TC096155 | 0.06  | 0.91  |      | -0.12 | 0.85      |      | -3.32 | 0         | Down | -1.61 | 0.02  | Down | Os09g0479300 protein                                          |             |
| Pc_TC096161 | 0.21  | 0.84  |      | 0.79  | 0.39      |      | -2.04 | 0.15      |      | -2.37 | 0.04  | Down | Expressed protein                                             |             |
| Pc_TC096167 | -1.76 | 0.12  |      | 0.41  | 0.7       |      | -3.56 | 0.04      | Down | -2.43 | 0.05  |      | Expressed protein                                             |             |
| Pc_TC096178 | 1.55  | 0.01  | Up   | 0     | 1.04E-007 |      | 1.33  | 0.2       |      | -0.78 | 0.32  |      | OSJNBa0042115.9 protein                                       | TRAF        |
| Pc_TC096196 | 0.74  | 0.44  |      | 1.24  | 0.21      |      | -3.74 | 0.05      | Down | -0.04 | 1     |      | DNA-binding bromodomain-containing protein                    | Bromodomain |
| Pc_TC096200 | -4.01 | 0.02  | Down | -0.71 | 0.62      |      | 1.83  | 0.15      |      | 1.4   | 0.15  |      | Expressed protein                                             |             |
| Pc_TC096206 | -1.71 | 0.1   |      | -4.9  | 0         | Down | 0.98  | 0.42      |      | -0.04 | 1     |      | Expressed protein                                             |             |
| Pc_TC096207 | 0.14  | 0.88  |      | 0.43  | 0.63      |      | -4.96 | 0         | Down | -1.51 | 0.12  |      | Expressed protein                                             |             |
| Pc_TC096217 | -1.35 | 0.16  |      | 0.39  | 0.69      |      | -3.63 | 0.02      | Down | -0.6  | 0.55  |      | Expressed protein                                             |             |
| Pc_TC096218 | -0.01 | 1     |      | -0.62 | 0.67      |      | 0     | 0.01      |      | -3.37 | 0.04  | Down | Expressed protein                                             |             |
| Pc_TC096226 | -0.34 | 0.66  |      | -0.89 | 0.32      |      | 2.18  | 0.04      | Up   | 1.3   | 0.08  |      | Expressed protein                                             |             |
| Pc_TC096244 | -0.33 | 0.69  |      | -3.23 | 0.01      | Down | 0.52  | 0.66      |      | -0.56 | 0.54  |      | Expressed protein                                             |             |
| Pc_TC096266 | 0.46  | 0.63  |      | 0.62  | 0.55      |      | -0.93 | 0.53      |      | -2.58 | 0.05  | Down | Expressed protein                                             |             |
| Pc_TC096286 | 0.29  | 0.55  |      | 0.89  | 0.12      |      | -4.75 | 9.03E-005 | Down | -2.51 | 0     | Down | Expressed protein                                             |             |
| Pc_TC096289 | 1.78  | 0     | Up   | 0     | 8.41E-010 |      | 1.29  | 0.2       |      | 0.9   | 0.18  |      | NADH dehydrogenase 1A                                         |             |
| Pc_TC096292 | -1.81 | 0.04  | Down | -0.94 | 0.31      |      | 0.96  | 0.39      |      | -0.27 | 0.77  |      | Expressed protein                                             |             |
| Pc_TC096299 | 3.47  | 0.02  | Up   | 2.23  | 0.29      |      | 1.09  | 0.77      |      | 2.21  | 0.26  |      | Expressed protein                                             |             |
| Pc_TC096316 | 2.03  | 0     | Up   | 0     | 1.16E-005 |      | 1.65  | 0.13      |      | 0.44  | 0.59  |      | P-loop nucleoside triphosphate hydrolases superfamily protein |             |
| Pc_TC096337 | 0.61  | 0.3   |      | 1.38  | 0.03      | Up   | -3.79 | 0         | Down | -1.83 | 0.02  | Down | Putative uncharacterized protein                              |             |
| Pc_TC096344 | -0.66 | 0.5   |      | -2.85 | 0.03      | Down | 0.24  | 0.87      |      | 0.14  | 0.91  |      | Expressed protein                                             |             |
| Pc_TC096346 | 2.81  | ##### | Up   | 0     | 4.68E-006 |      | 2.83  | 0.01      | Up   | 1.32  | 0.07  |      | Expressed protein                                             |             |
| Pc_TC096381 | 0.4   | 0.48  |      | 0.87  | 0.17      |      | -1.54 | 0.16      |      | -1.7  | 0.03  | Down | Expressed protein                                             |             |
| Pc_TC096385 | -0.01 | 1     |      | -0.13 | 0.93      |      | -4.54 | 0.01      | Down | -2.61 | 0.02  | Down | Expressed protein                                             |             |
| Pc_TC096387 | -0.06 | 0.94  |      | 0.11  | 0.9       |      | -1.82 | 0.13      |      | -2.26 | 0.01  | Down | Uncharacterized protein                                       |             |
| Pc_TC096415 | 1.67  | 0     | Up   | 0     | 2.72E-008 |      | 1.11  | 0.29      |      | -0.22 | 0.78  |      | Expressed protein                                             |             |
| Pc_TC096432 | 0.03  | 0.95  |      | 0.54  | 0.32      |      | -1.47 | 0.14      |      | -1.46 | 0.02  | Down | Expressed protein                                             |             |
| Pc_TC096440 | 0.36  | 0.21  |      | 0.28  | 0.44      |      | -2.53 | 0         | Down | -1.73 | 0     | Down | Expressed protein                                             |             |
| Pc_TC096442 | -1.26 | 0.13  |      | 0.21  | 0.82      |      | -1.9  | 0.14      |      | -2.52 | 0.01  | Down | Expressed protein                                             |             |
| Pc_TC096453 | -2.64 | 0.02  | Down | -0.13 | 0.93      |      | -1.37 | 0.32      |      | 0.46  | 0.62  |      | Expressed protein                                             |             |
| Pc_TC096480 | -0.69 | 0.37  |      | 0.03  | 0.99      |      | 0     | 0         |      | -5.23 | ##### | Down | Expressed protein                                             |             |
| Pc_TC096517 | -0.3  | 0.88  |      | -2.64 | 0.16      |      | 2.78  | 0.03      | Up   | 0.25  | 0.89  |      | AGAMOUS-like 12                                               |             |
| Pc_TC096518 | -0.34 | 0.93  |      | -0.94 | 0.67      |      | 2.93  | 0.03      | Up   | 2.51  | 0.02  | Up   | AGAMOUS-like 12                                               |             |
| Pc_TC096520 | -0.1  | 0.96  |      | -2.32 | 0.08      |      | 4.02  | 0         | Up   | 2.22  | 0.01  | Up   | AGAMOUS-like 12                                               |             |
| Pc_TC096521 | -2.34 | 0.01  | Down | -2.36 | 0.03      | Down | 2.98  | 0.01      | Up   | 1.07  | 0.18  |      | AGAMOUS-like 12                                               |             |
| Pc_TC096533 | 1.76  | 0.02  | Up   | 0.7   | 0.49      |      | 0.81  | 0.53      |      | 0.83  | 0.39  |      | Expressed protein                                             |             |
| Pc_TC096551 | 2.95  | 0     | Up   | 1.87  | 0.09      |      | 1.43  | 0.33      |      | 1.21  | 0.31  |      | Expressed protein                                             |             |
| Pc_TC096573 | 0.43  | 0.47  |      | 0.37  | 0.6       |      | -2.94 | 0.01      | Down | -1.42 | 0.07  |      | Leucine-rich repeat protein kinase family protein             |             |
| Pc_TC096575 | -0.42 | 0.71  |      | -1.07 | 0.38      |      | -2.27 | 0.14      |      | -2.96 | 0.03  | Down | Expressed protein                                             |             |
| Pc_TC096576 | -0.98 | 0.36  |      | -0.89 | 0.46      |      | -2.14 | 0.16      |      | -3.43 | 0.01  | Down | Expressed protein                                             |             |
| Pc_TC096583 | 2.58  | 0     | Up   | 0     | 0.04      |      | 1.8   | 0.18      |      | 0.68  | 0.59  |      | AICARFT/IMPChase bienzyme family protein                      |             |
| Pc_TC096609 | -2.57 | ##### | Down | 0.07  | 0.93      |      | 0.73  | 0.47      |      | 0.53  | 0.42  |      | nuclear RNA polymerase A1                                     |             |
| Pc_TC096622 | -0.09 | 0.91  |      | 0.76  | 0.29      |      | -1.55 | 0.18      |      | -1.63 | 0.05  | Down | ADP-ribosylation factor family protein                        |             |
| Pc_TC096626 | 1.49  | 0.03  | Up   | 0.7   | 0.43      |      | -0.42 | 0.76      |      | 0.52  | 0.56  |      | Uncharacterized protein                                       |             |
| Pc_TC096647 | -0.58 | 0.63  |      | -0.6  | 0.65      |      | -0.94 | 0.55      |      | -3.04 | 0.04  | Down | Expressed protein                                             |             |
| Pc_TC096649 | 2.18  | 0     | Up   | 0     | 0         |      | 1.53  | 0.21      |      | -0.32 | 0.79  |      | Expressed protein                                             |             |
| Pc_TC096662 | 2.05  | 0     | Up   | 0     | 0         |      | 1.61  | 0.17      |      | -0.48 | 0.66  |      | Expressed protein                                             |             |
| Pc_TC096668 | -0.97 | 0.32  |      | 0.53  | 0.58      |      | 2.29  | 0.05      | Up   | 1.01  | 0.25  |      | SNAP1                                                         |             |
| Pc_TC096677 | 0.31  | 0.59  |      | -1.62 | 0.03      | Down | 0.41  | 0.7       |      | 0.37  | 0.59  |      | cytochrome P450, family 76, subfamily C, polypeptide 7        |             |

|             |       |       |      |       |           |      |       |           |      |       |       |      |                                                       |
|-------------|-------|-------|------|-------|-----------|------|-------|-----------|------|-------|-------|------|-------------------------------------------------------|
| Pc_TC096691 | -0.06 | 0.97  |      | 0.79  | 0.34      |      | -4.37 | 0.01      | Down | -3.83 | 0     | Down | Expressed protein                                     |
| Pc_TC096698 | 0.88  | 0.16  |      | 1.95  | 0         | Up   | 0     | 3.46E-005 |      | -2.9  | 0     | Down | Expressed protein                                     |
| Pc_TC096710 | 0.63  | 0.13  |      | 0.92  | 0.07      |      | -3.49 | 0         | Down | -1.07 | 0.08  |      | Expressed protein                                     |
| Pc_TC096719 | 5.25  | 0     | Up   | 3.76  | 0.07      |      | 3.09  | 0.24      |      | 4.21  | 0.02  | Up   | Expressed protein                                     |
| Pc_TC096750 | 0.11  | 0.88  |      | 0.38  | 0.62      |      | 1.01  | 0.35      |      | 1.48  | 0.04  | Up   | Expressed protein                                     |
| Pc_TC096771 | 1.77  | ##### | Up   | -6.67 | 2.51E-013 | Down | 1.74  | 0.06      |      | -0.11 | 0.87  |      | Heat shock protein 70 (Hsp 70) family protein         |
| Pc_TC096772 | 0.6   | 0.32  |      | 1.38  | 0.04      | Up   | -3.13 | 0.01      | Down | -1.65 | 0.04  | Down | Expressed protein                                     |
| Pc_TC096784 | -0.16 | 0.8   |      | 0.13  | 0.86      |      | -2.82 | 0.02      | Down | -1.25 | 0.1   |      | Expressed protein                                     |
| Pc_TC096789 | -0.22 | 0.74  |      | 0.82  | 0.23      |      | -1.32 | 0.24      |      | -1.88 | 0.02  | Down | Expressed protein                                     |
| Pc_TC096794 | -1.51 | 0.04  | Down | -0.64 | 0.44      |      | 0.06  | 0.97      |      | 0.03  | 0.99  |      | Expressed protein                                     |
| Pc_TC096796 | -0.74 | 0.27  |      | 0.29  | 0.69      |      | -1.88 | 0.11      |      | -2.09 | 0.01  | Down | cysteine-rich RLK (RECEPTOR-like protein kinase) 8    |
| Pc_TC096816 | 0.82  | 0.25  |      | -0.35 | 0.72      |      | -3.4  | 0.02      | Down | -1.47 | 0.13  |      | Expressed protein                                     |
| Pc_TC096819 | 0.37  | 0.72  |      | 2.38  | 0         | Up   | 0     | 0.01      |      | -3.83 | 0.01  | Down | Expressed protein                                     |
| Pc_TC096827 | 0.16  | 0.74  |      | 0.61  | 0.27      |      | -2.5  | 0.02      | Down | -0.92 | 0.15  |      | Expressed protein                                     |
| Pc_TC096829 | -0.09 | 0.95  |      | 1.3   | 0.12      |      | -4.08 | 0.01      | Down | -1.54 | 0.13  |      | Expressed protein                                     |
| Pc_TC096834 | -0.96 | 0.12  |      | -1.54 | 0.04      | Down | 0.61  | 0.56      |      | 0.05  | 0.96  |      | Expressed protein                                     |
| Pc_TC096860 | 0.62  | 0.39  |      | 1.31  | 0.09      |      | -3.5  | 0.02      | Down | -1.64 | 0.09  |      | Expressed protein                                     |
| Pc_TC096870 | -1.12 | 0.04  | Down | -1.06 | 0.1       |      | 0.97  | 0.32      |      | 0.35  | 0.58  |      | Nucleolar 27S pre-rRNA processing,Urb2/Npa2           |
| Pc_TC096874 | -0.01 | 1     |      | 0.76  | 0.32      |      | -2.91 | 0.03      | Down | -0.44 | 0.6   |      | Expressed protein                                     |
| Pc_TC096876 | 0.44  | 0.44  |      | 0.84  | 0.2       |      | -1.66 | 0.14      |      | -1.74 | 0.02  | Down | Uncharacterized protein                               |
| Pc_TC096903 | 0.82  | 0.14  |      | 0.33  | 0.63      |      | -2.73 | 0.02      | Down | -0.95 | 0.2   |      | Expressed protein                                     |
| Pc_TC096904 | 0.01  | 1     |      | 1.25  | 0.09      |      | -2.68 | 0.04      | Down | -1.07 | 0.21  |      | Expressed protein                                     |
| Pc_TC096910 | -0.5  | 0.41  |      | -2.45 | 0         | Down | 0.55  | 0.6       |      | 0     | 1     |      | Uncharacterized protein family (UPF0016)              |
| Pc_TC096912 | 0.19  | 0.94  |      | 1     | 0.39      |      | 0.8   | 0.59      |      | 2.48  | 0.01  | Up   | Uncharacterized protein family (UPF0016)              |
| Pc_TC096922 | 0.29  | 0.58  |      | -0.98 | 0.15      |      | 0.26  | 0.8       |      | 1.58  | 0.01  | Up   | Expressed protein                                     |
| Pc_TC096924 | -1.63 | 0.04  | Down | -1.09 | 0.22      |      | 0.13  | 0.92      |      | 0.15  | 0.87  |      | Uncharacterized protein                               |
| Pc_TC096930 | 0.8   | 0.23  |      | 0.24  | 0.78      |      | 1.74  | 0.11      |      | 1.49  | 0.05  | Up   | Expressed protein                                     |
| Pc_TC096943 | -0.42 | 0.6   |      | 0.43  | 0.61      |      | 3.83  | 0         | Up   | 2.11  | 0     | Up   | sulphotransferase 12                                  |
| Pc_TC096950 | 1.37  | 0     | Up   | 0.75  | 0.17      |      | -1.17 | 0.24      |      | 0.12  | 0.84  |      | Expressed protein                                     |
| Pc_TC096955 | 0.46  | 0.52  |      | 0.18  | 0.85      |      | -2.63 | 0.05      | Down | -0.92 | 0.3   |      | Expressed protein                                     |
| Pc_TC096960 | -1.11 | 0.18  |      | -0.17 | 0.87      |      | -3.5  | 0.02      | Down | -3.96 | 0     | Down | Expressed protein                                     |
| Pc_TC096962 | -1.09 | 0.04  | Down | -0.56 | 0.37      |      | 0.05  | 0.96      |      | -0.72 | 0.28  |      | Expressed protein                                     |
| Pc_TC096963 | -1.03 | 0.04  | Down | -0.68 | 0.26      |      | 0.52  | 0.59      |      | -0.07 | 0.91  |      | Expressed protein                                     |
| Pc_TC096964 | 0.46  | 0.39  |      | 0.28  | 0.66      |      | 1.88  | 0.05      |      | 1.63  | 0.01  | Up   | Expressed protein                                     |
| Pc_TC096980 | -2.19 | 0.01  | Down | -2.13 | 0.02      | Down | 2.54  | 0.01      | Up   | 1.02  | 0.16  |      | Expressed protein                                     |
| Pc_TC096988 | 0.36  | 0.7   |      | 0.3   | 0.79      |      | -4.3  | 0.02      | Down | -1.72 | 0.13  |      | Expressed protein                                     |
| Pc_TC096993 | -2.09 | 0.03  | Down | -0.85 | 0.38      |      | 1.42  | 0.21      |      | 0.53  | 0.54  |      | Expressed protein                                     |
| Pc_TC096995 | -2.14 | 0.03  | Down | -0.81 | 0.41      |      | -3.57 | 0.02      | Down | -1.24 | 0.2   |      | Uncharacterized protein                               |
| Pc_TC096999 | 0.97  | 0.13  |      | 1.37  | 0.06      |      | -3.41 | 0.01      | Down | -2    | 0.03  | Down | Expressed protein                                     |
| Pc_TC097000 | -1.94 | 0.02  | Down | -1.57 | 0.09      |      | -0.64 | 0.59      |      | -1.11 | 0.2   |      | Expressed protein                                     |
| Pc_TC097010 | 0.69  | 0.27  |      | 1.48  | 0.03      | Up   | -0.39 | 0.74      |      | 0.13  | 0.88  |      | Expressed protein                                     |
| Pc_TC097019 | 2.75  | ##### | Up   | 0     | 1.74E-005 |      | 3.53  | 0         | Up   | -2.57 | 0.01  | Down | fatty acid desaturase 5                               |
| Pc_TC097030 | 0.92  | 0.19  |      | 2.03  | 0.01      | Up   | -0.75 | 0.56      |      | 0.54  | 0.53  |      | Expressed protein                                     |
| Pc_TC097045 | 0.08  | 1     |      | -0.75 | 0.78      |      | 2.53  | 0.08      |      | 2.28  | 0.05  | Up   | Expressed protein                                     |
| Pc_TC097048 | -1.13 | 0.22  |      | -2.57 | 0.03      | Down | -0.35 | 0.8       |      | -0.83 | 0.4   |      | Expressed protein                                     |
| Pc_TC097056 | 2.07  | 0     | Up   | -5.37 | 9.89E-006 | Down | 1.21  | 0.25      |      | 0.3   | 0.7   |      | Aldolase superfamily protein                          |
| Pc_TC097057 | 1.69  | 0.04  | Up   | 0     | 0.01      |      | 2.41  | 0.05      | Up   | -1.16 | 0.35  |      | Aldolase superfamily protein                          |
| Pc_TC097064 | -0.08 | 0.93  |      | 1.69  | 0.02      | Up   | 0     | 5.50E-005 |      | -2.65 | 0.01  | Down | cysteine-rich RLK (RECEPTOR-like protein kinase) 8    |
| Pc_TC097069 | -0.19 | 0.78  |      | 0.4   | 0.58      |      | -2.44 | 0.04      | Down | -0.91 | 0.25  |      | Expressed protein                                     |
| Pc_TC097081 | 1.69  | 0.03  | Up   | 0.88  | 0.39      |      | 0.7   | 0.61      |      | 1.59  | 0.08  |      | Putative uncharacterized protein OJ1212 C09.22        |
| Pc_TC097108 | 0     | 0     |      | 0     | 0         |      | 0     | 0         |      | -4.33 | 0     | Down | Uncharacterized protein                               |
| Pc_TC097128 | 0.26  | 0.66  |      | 0.81  | 0.22      |      | -1.86 | 0.1       |      | -1.56 | 0.04  | Down | Expressed protein                                     |
| Pc_TC097131 | 0     | 1     |      | 0.35  | 0.72      |      | -5.67 | 0         | Down | -2.22 | 0.04  | Down | Expressed protein                                     |
| Pc_TC097136 | 0.13  | 0.84  |      | 0.38  | 0.6       |      | 0     | 7.14E-006 |      | -7.06 | ##### | Down | OSINBa0035M09.19 protein                              |
| Pc_TC097137 | -1.16 | 0.27  |      | 1.22  | 0.18      |      | 0     | 0         |      | -3.08 | 0.02  | Down | Expressed protein                                     |
| Pc_TC097157 | 1.9   | 0.04  | Up   | 0     | 0.05      |      | 1.13  | 0.45      |      | -0.83 | 0.6   |      | Expressed protein                                     |
| Pc_TC097158 | 0.19  | 0.82  |      | 0.74  | 0.37      |      | -3.08 | 0.03      | Down | -2.96 | 0.01  | Down | Expressed protein                                     |
| Pc_TC097166 | 0.36  | 0.35  |      | 0.31  | 0.52      |      | -2.39 | 0.01      | Down | -1.33 | 0.02  | Down | Putative formylglycineamide ribotide amidotransferase |
| Pc_TC097169 | -0.21 | 0.88  |      | 0.12  | 0.95      |      | -3.96 | 0.03      | Down | -0.93 | 0.43  |      | peroxisomal ABC transporter 1                         |
| Pc_TC097170 | 0.29  | 0.68  |      | 0.73  | 0.34      |      | -4.26 | 0         | Down | -0.25 | 0.77  |      | Expressed protein                                     |
| Pc_TC097184 | 0.63  | 0.4   |      | 0.51  | 0.56      |      | -5.92 | 0         | Down | -1.48 | 0.13  |      | Expressed protein                                     |
| Pc_TC097191 | -0.02 | 0.98  |      | 0.61  | 0.33      |      | -1.97 | 0.07      |      | -1.96 | 0.01  | Down | Expressed protein                                     |



|             |       |       |      |       |           |      |       |      |      |       |       |      |                                                         |
|-------------|-------|-------|------|-------|-----------|------|-------|------|------|-------|-------|------|---------------------------------------------------------|
| Pc_TC097196 | -1.02 | 0.3   |      | 0.67  | 0.47      |      | -1.6  | 0.26 |      | -2.47 | 0.04  | Down | Expressed protein                                       |
| Pc_TC097203 | 0.61  | 0.31  |      | 1.51  | 0.02      | Up   | -5.22 | 0    | Down | -1.93 | 0.02  | Down | Expressed protein                                       |
| Pc_TC097206 | 1.38  | 0.04  | Up   | 0     | 9.94E-005 |      | 0.92  | 0.43 |      | -0.8  | 0.4   |      | Ribosomal protein S8e family protein                    |
| Pc_TC097219 | 1.14  | 0.04  | Up   | 0.29  | 0.7       |      | 0.18  | 0.87 |      | 2.9   | ##### | Up   | Expressed protein                                       |
| Pc_TC097232 | 0.48  | 0.19  |      | 0.46  | 0.32      |      | -2.22 | 0.02 | Down | -1.05 | 0.06  |      | Expressed protein                                       |
| Pc_TC097252 | 0     | 1     |      | 0.8   | 0.46      |      | -4.67 | 0.03 | Down | -3.54 | 0.03  | Down | Expressed protein                                       |
| Pc_TC097253 | -0.05 | 0.93  |      | -1.38 | 0.04      | Down | 1.24  | 0.2  |      | 0.63  | 0.31  |      | GPI ethanolamine phosphate transferase 1                |
| Pc_TC097278 | -0.19 | 0.87  |      | -0.34 | 0.77      |      | 2.27  | 0.05 | Up   | 1.34  | 0.12  |      | Expressed protein                                       |
| Pc_TC097291 | 0.07  | 0.93  |      | -0.25 | 0.74      |      | -2.81 | 0.02 | Down | -0.84 | 0.28  |      | Expressed protein                                       |
| Pc_TC097293 | 3.83  | 0     | Up   | 0     | 0.36      |      | 3.03  | 0.06 |      | 2.48  | 0.07  |      | serine hydroxymethyltransferase 3                       |
| Pc_TC097302 | -0.07 | 0.9   |      | 0.3   | 0.64      |      | -1.57 | 0.14 |      | -1.68 | 0.02  | Down | Expressed protein                                       |
| Pc_TC097305 | 1.15  | 0.19  |      | 2.9   | 0         | Up   | 0.58  | 0.69 |      | -0.23 | 0.88  |      | Ribosomal protein S26e family protein                   |
| Pc_TC097307 | -1.85 | 0.06  |      | -1.02 | 0.32      |      | -2.94 | 0.05 | Down | -2.82 | 0.01  | Down | tRNA pseudouridine synthase                             |
| Pc_TC097311 | 2.16  | ##### | Up   | 0     | 1.10E-008 |      | 1.71  | 0.09 |      | 0.4   | 0.58  |      | temperature-induced lipocalin                           |
| Pc_TC097318 | -0.33 | 0.69  |      | 0.03  | 1         |      | -2.05 | 0.11 |      | -2.02 | 0.04  | Down | Expressed protein                                       |
| Pc_TC097337 | 1.87  | 0     | Up   | 0     | 7.77E-010 |      | 1.35  | 0.18 |      | -0.29 | 0.68  |      | Ribosomal protein L14                                   |
| Pc_TC097347 | -1.21 | 0.29  |      | -1.23 | 0.33      |      | -3.37 | 0.05 |      | -3.25 | 0.02  | Down | Protein of unknown function (DUF677)                    |
| Pc_TC097350 | 0.1   | 0.78  |      | 0.03  | 0.95      |      | -3.2  | 0    | Down | -2.63 | ##### | Down | Uncharacterized protein                                 |
| Pc_TC097351 | -2.62 | 0.12  |      | -0.64 | 0.7       |      | 2.72  | 0.03 | Up   | 1.45  | 0.17  |      | Expressed protein                                       |
| Pc_TC097355 | 4.72  | ##### | Up   | 0     | 0.11      |      | 0.96  | 0.57 |      | 0     | 0.06  |      | cytochrome P450, family 71, subfamily B, polypeptide 23 |
| Pc_TC097362 | -0.31 | 0.74  |      | -0.38 | 0.71      |      | -3.42 | 0.02 | Down | -4.04 | 0     | Down | Expressed protein                                       |
| Pc_TC097376 | -4.24 | 0.01  | Down | -0.68 | 0.6       |      | -0.73 | 0.63 |      | -1    | 0.41  |      | Expressed protein                                       |
| Pc_TC097390 | 0.57  | 0.17  |      | 0.82  | 0.11      |      | -2.54 | 0.01 | Down | -0.86 | 0.16  |      | Expressed protein                                       |
| Pc_TC097391 | 0.02  | 1     |      | 0.91  | 0.33      |      | -3.61 | 0.03 | Down | -0.91 | 0.41  |      | Expressed protein                                       |
| Pc_TC097406 | -0.72 | 0.49  |      | 0.11  | 0.95      |      | -1.88 | 0.21 |      | -3.08 | 0.02  | Down | aldehyde dehydrogenase 2B4                              |
| Pc_TC097436 | -4.01 | 0     | Down | -1.61 | 0.1       |      | -1    | 0.42 |      | -0.29 | 0.75  |      | Putative uncharacterized protein                        |
| Pc_TC097458 | -0.04 | 0.99  |      | 0.19  | 0.84      |      | -3.2  | 0.02 | Down | -1.08 | 0.24  |      | Expressed protein                                       |
| Pc_TC097468 | -0.48 | 0.66  |      | -1    | 0.4       |      | 2.73  | 0.02 | Up   | 1.92  | 0.02  | Up   | Expressed protein                                       |
| Pc_TC097475 | -1.2  | 0.08  |      | -1.69 | 0.04      | Down | 1.75  | 0.09 |      | 0.99  | 0.16  |      | Expressed protein                                       |
| Pc_TC097478 | -0.49 | 0.56  |      | -0.61 | 0.52      |      | -2.85 | 0.04 | Down | -1.09 | 0.24  |      | Expressed protein                                       |
| Pc_TC097481 | 0.09  | 0.88  |      | 0.15  | 0.82      |      | -2.1  | 0.06 |      | -1.51 | 0.04  | Down | Expressed protein                                       |
| Pc_TC097484 | 0.28  | 0.65  |      | 1.32  | 0.05      | Up   | -1.86 | 0.11 |      | 0.21  | 0.79  |      | Expressed protein                                       |
| Pc_TC097487 | 0.37  | 0.57  |      | 0.44  | 0.56      |      | -2.28 | 0.06 |      | -2.09 | 0.02  | Down | Expressed protein                                       |
| Pc_TC097489 | 3.33  | 0.03  | Up   | 0     | 0.67      |      | 2.09  | 0.38 |      | 1.63  | 0.49  |      | Expressed protein                                       |
| Pc_TC097496 | -0.33 | 0.29  |      | -0.84 | 0.04      |      | -1.32 | 0.12 |      | -1.56 | 0     | Down | Expressed protein                                       |
| Pc_TC097510 | 0.48  | 0.59  |      | 0.84  | 0.37      |      | -5.3  | 0.01 | Down | -5.18 | 0     | Down | Expressed protein                                       |
| Pc_TC097516 | 0.38  | 0.56  |      | 0.87  | 0.22      |      | -2.94 | 0.02 | Down | -1.36 | 0.1   |      | Expressed protein                                       |
| Pc_TC097520 | -0.09 | 0.92  |      | 1.06  | 0.14      |      | -0.82 | 0.48 |      | -2.26 | 0.01  | Down | Uncharacterized protein                                 |
| Pc_TC097521 | -3.15 | ##### | Down | -3.6  | 9.31E-006 | Down | -3.39 | 0    | Down | -6.54 | ##### | Down | Expressed protein                                       |
| Pc_TC097532 | -1.35 | 0.02  | Down | -0.86 | 0.2       |      | -1.11 | 0.29 |      | -1.71 | 0.02  | Down | Expressed protein                                       |
| Pc_TC097539 | 1.12  | 0.05  |      | 1.63  | 0.01      | Up   | -2.75 | 0.02 | Down | 0.5   | 0.5   |      | Uncharacterized protein                                 |
| Pc_TC097554 | 3.25  | 0.14  |      | 1.06  | 0.98      |      | 4.31  | 0.04 | Up   | 3.43  | 0.1   |      | Expressed protein                                       |
| Pc_TC097560 | 0.33  | 0.62  |      | 0.48  | 0.52      |      | -2.34 | 0.06 |      | -1.98 | 0.02  | Down | Expressed protein                                       |
| Pc_TC097562 | 0.4   | 0.64  |      | 0.73  | 0.42      |      | -3.91 | 0.02 | Down | -2.2  | 0.05  |      | Expressed protein                                       |
| Pc_TC097564 | 0.3   | 0.64  |      | 0.44  | 0.55      |      | -3.27 | 0.01 | Down | -1.26 | 0.12  |      | Expressed protein                                       |
| Pc_TC097573 | -0.81 | 0.23  |      | -1.65 | 0.05      | Down | 0.65  | 0.54 |      | -0.29 | 0.71  |      | Expressed protein                                       |
| Pc_TC097594 | -0.64 | 0.4   |      | 0.81  | 0.29      |      | -3.5  | 0.01 | Down | -2.57 | 0.01  | Down | Expressed protein                                       |
| Pc_TC097630 | -0.94 | 0.18  |      | -1.84 | 0.03      | Down | 0.69  | 0.52 |      | -0.04 | 0.97  |      | Expressed protein                                       |
| Pc_TC097641 | -0.92 | 0.51  |      | -0.75 | 0.63      |      | -1.3  | 0.45 |      | -4.18 | 0.03  | Down | Expressed protein                                       |
| Pc_TC097644 | 2.06  | 0     | Up   | 0     | 5.31E-006 |      | 1.38  | 0.2  |      | -0.11 | 0.91  |      | Ribosomal protein S5 domain 2-like superfamily protein  |
| Pc_TC097650 | -1.49 | 0.04  | Down | -2.56 | 0.01      | Down | 0.35  | 0.75 |      | -0.39 | 0.62  |      | Ribonuclease H-like superfamily protein                 |
| Pc_TC097663 | 0.1   | 0.91  |      | 1.46  | 0.04      | Up   | -4.52 | 0    | Down | -1.59 | 0.07  |      | Expressed protein                                       |
| Pc_TC097665 | -1.4  | 0.2   |      | 1.89  | 0.03      | Up   | -2.56 | 0.1  |      | -2.02 | 0.09  |      | Putative Mutator protein                                |
| Pc_TC097667 | 1.22  | 0.04  | Up   | -0.65 | 0.44      |      | 0.14  | 0.91 |      | 0.33  | 0.68  |      | Expressed protein                                       |
| Pc_TC097682 | -0.92 | 0.39  |      | 0.17  | 0.91      |      | -1.5  | 0.31 |      | -4.96 | 0     | Down | Expressed protein                                       |
| Pc_TC097691 | 0.27  | 0.66  |      | 0.09  | 0.91      |      | -3.44 | 0.01 | Down | -0.08 | 0.92  |      | Expressed protein                                       |
| Pc_TC097753 | -1.1  | 0.21  |      | -2.78 | 0.02      | Down | 0.82  | 0.48 |      | -0.16 | 0.88  |      | Expressed protein                                       |
| Pc_TC097757 | -1.01 | 0.43  |      | -4.03 | 0.04      | Down | -1.12 | 0.49 |      | -1.14 | 0.38  |      | Expressed protein                                       |
| Pc_TC097776 | 0.2   | 0.6   |      | 0.52  | 0.27      |      | -2.13 | 0.03 | Down | -1.73 | 0     | Down | Expressed protein                                       |
| Pc_TC097781 | -0.02 | 0.99  |      | 0.58  | 0.4       |      | -5.78 | 0    | Down | -4.66 | ##### | Down | Expressed protein                                       |
| Pc_TC097785 | 2.06  | ##### | Up   | -7.83 | 2.20E-015 | Down | 2.16  | 0.02 | Up   | 1.15  | 0.05  | Up   | Expressed protein                                       |
| Pc_TC097792 | 0.38  | 0.63  |      | 0.94  | 0.26      |      | -3.92 | 0.01 | Down | -1.71 | 0.08  |      | Expressed protein                                       |

|             |       |       |      |       |           |      |  |       |           |      |       |       |      |                                                                          |
|-------------|-------|-------|------|-------|-----------|------|--|-------|-----------|------|-------|-------|------|--------------------------------------------------------------------------|
| Pc_TC097794 | -1.99 | 0.03  | Down | -0.82 | 0.39      |      |  | -0.81 | 0.52      |      | -1.37 | 0.15  |      | Expressed protein                                                        |
| Pc_TC097801 | 0.61  | 0.29  |      | 0.22  | 0.76      |      |  | -2.38 | 0.04      | Down | -0.57 | 0.45  |      | Expressed protein                                                        |
| Pc_TC097806 | 0.02  | 0.99  |      | 1.6   | 0.02      | Up   |  | -3.33 | 0.01      | Down | 0.68  | 0.34  |      | Expressed protein                                                        |
| Pc_TC097818 | 0     | 0.01  |      | 0     | 0.01      |      |  | -3    | 0.1       |      | -3.46 | 0.03  | Down | Expressed protein                                                        |
| Pc_TC097822 | 0.26  | 0.53  |      | 0.31  | 0.55      |      |  | -1.26 | 0.19      |      | -1.32 | 0.03  | Down | Expressed protein                                                        |
| Pc_TC097849 | 0     | 1     |      | -0.55 | 0.3       |      |  | -4.3  | 7.56E-005 | Down | -2.62 | ##### | Down | Uncharacterized protein                                                  |
| Pc_TC097850 | -0.17 | 0.69  |      | 0.17  | 0.74      |      |  | -1.89 | 0.06      |      | -1.31 | 0.03  | Down | Expressed protein                                                        |
| Pc_TC097860 | 1.37  | 0     | Up   | 0.95  | 0.11      |      |  | -0.37 | 0.72      |      | 0.84  | 0.19  |      | Expressed protein                                                        |
| Pc_TC097864 | -0.07 | 0.91  |      | 1.22  | 0.05      | Up   |  | -2.57 | 0.02      | Down | -1.47 | 0.05  | Down | Expressed protein                                                        |
| Pc_TC097867 | -0.92 | 0.19  |      | -0.94 | 0.24      |      |  | -1.74 | 0.14      |      | -2.01 | 0.02  | Down | unknown protein                                                          |
| Pc_TC097868 | -3.73 | 0.05  | Down | -2.16 | 0.2       |      |  | -0.22 | 0.93      |      | -1.6  | 0.27  |      | gag protein                                                              |
| Pc_TC097869 | 0.75  | 0.27  |      | 1.79  | 0.01      | Up   |  | -0.63 | 0.6       |      | 0.1   | 0.93  |      | Expressed protein                                                        |
| Pc_TC097876 | 0.15  | 0.82  |      | 0.16  | 0.84      |      |  | -2.54 | 0.04      | Down | -1.99 | 0.02  | Down | Expressed protein                                                        |
| Pc_TC097887 | -0.23 | 0.64  |      | 1.09  | 0.05      |      |  | -2.04 | 0.05      |      | -1.64 | 0.02  | Down | Expressed protein                                                        |
| Pc_TC097900 | 0.14  | 0.84  |      | 0.88  | 0.21      |      |  | -2.83 | 0.02      | Down | -1.8  | 0.03  | Down | Expressed protein                                                        |
| Pc_TC097901 | -0.1  | 0.94  |      | -5.03 | 0         | Down |  | 0.68  | 0.58      |      | 0.42  | 0.66  |      | Expressed protein                                                        |
| Pc_TC097903 | -0.92 | 0.43  |      | -0.56 | 0.67      |      |  | -3.23 | 0.07      |      | -4.7  | 0.01  | Down | Expressed protein                                                        |
| Pc_TC097917 | -0.15 | 0.86  |      | -0.2  | 0.83      |      |  | -2.44 | 0.06      |      | -3.32 | 0     | Down | Expressed protein                                                        |
| Pc_TC097919 | -0.02 | 1     |      | 1.01  | 0.26      |      |  | -1.11 | 0.43      |      | -2.91 | 0.02  | Down | Expressed protein                                                        |
| Pc_TC097922 | -0.75 | 0.24  |      | -0.35 | 0.63      |      |  | -1.42 | 0.21      |      | -1.59 | 0.04  | Down | far-red elongated hypocotyls 3                                           |
| Pc_TC097927 | 0.78  | 0.2   |      | 0.86  | 0.23      |      |  | -1.4  | 0.23      |      | -2.13 | 0.01  | Down | Expressed protein                                                        |
| Pc_TC097932 | 0.01  | 1     |      | 0.29  | 0.73      |      |  | -4.17 | 0         | Down | -2.47 | 0.01  | Down | Expressed protein                                                        |
| Pc_TC097935 | -0.96 | 0.27  |      | 0.16  | 0.89      |      |  | -1.06 | 0.41      |      | -2.34 | 0.03  | Down | Expressed protein                                                        |
| Pc_TC097949 | 0.36  | 0.64  |      | 0.91  | 0.26      |      |  | -4.47 | 0         | Down | -1.76 | 0.07  |      | Expressed protein                                                        |
| Pc_TC097955 | -1.8  | 0     | Down | -2.11 | 0         | Down |  | 1.05  | 0.29      |      | -1.45 | 0.04  | Down | Expressed protein                                                        |
| Pc_TC097956 | -0.29 | 0.78  |      | 0.1   | 0.95      |      |  | -1.87 | 0.19      |      | -4.33 | 0     | Down | Expressed protein                                                        |
| Pc_TC097957 | 0.89  | 0.37  |      | 0.76  | 0.51      |      |  | -4.5  | 0.04      | Down | -2.79 | 0.07  |      | Expressed protein                                                        |
| Pc_TC097970 | 0.24  | 0.82  |      | -0.59 | 0.62      |      |  | 1.16  | 0.35      |      | 1.75  | 0.04  | Up   | Expressed protein                                                        |
| Pc_TC097978 | 0.11  | 0.88  |      | 1.01  | 0.15      |      |  | -5.51 | 0         | Down | -1.89 | 0.02  | Down | Expressed protein                                                        |
| Pc_TC097985 | 0.1   | 0.91  |      | -0.75 | 0.39      |      |  | 1.9   | 0.08      |      | 1.64  | 0.03  | Up   | Expressed protein                                                        |
| Pc_TC097995 | 1.74  | 0     | Up   | 0     | 7.76E-008 |      |  | 1.43  | 0.17      |      | 0.35  | 0.63  |      | Expressed protein                                                        |
| Pc_TC098000 | -0.28 | 0.71  |      | 0.68  | 0.38      |      |  | -2.23 | 0.08      |      | -1.96 | 0.03  | Down | Expressed protein                                                        |
| Pc_TC098009 | 0.41  | 0.52  |      | 1.51  | 0.03      | Up   |  | -4.91 | 0         | Down | -0.65 | 0.41  |      | Expressed protein                                                        |
| Pc_TC098012 | 0     | 0     |      | -3.53 | 0.02      | Down |  | 0     | 0         |      | 0     | 0     |      | NADH dehydrogenase 3                                                     |
| Pc_TC098039 | 2.35  | 0     | Up   | 0     | 0.02      |      |  | 1.9   | 0.14      |      | 0.53  | 0.65  |      | Expressed protein                                                        |
| Pc_TC098050 | -1.77 | 0.07  |      | -4.11 | 0         | Down |  | -1.5  | 0.27      |      | -0.84 | 0.39  |      | Expressed protein                                                        |
| Pc_TC098054 | 0.37  | 0.72  |      | 0.64  | 0.54      |      |  | -3.96 | 0.03      | Down | -1.83 | 0.14  |      | Uncharacterized protein                                                  |
| Pc_TC098064 | -0.72 | 0.35  |      | -0.43 | 0.63      |      |  | -2.92 | 0.03      | Down | -2.17 | 0.02  | Down | Expressed protein                                                        |
| Pc_TC098072 | 0.41  | 0.54  |      | 0.95  | 0.2       |      |  | -2.6  | 0.04      | Down | -1.48 | 0.09  |      | Expressed protein                                                        |
| Pc_TC098077 | 2.91  | ##### | Up   | 0     | 0         |      |  | 1.97  | 0.08      |      | 0.95  | 0.25  |      | Eukaryotic porin family protein                                          |
| Pc_TC098083 | 0.68  | 0.33  |      | 0     | 2.64E-005 |      |  | 3.59  | 0         | Up   | 0.77  | 0.34  |      | S-adenosyl-L-methionine-dependent methyltransferases superfamily protein |
| Pc_TC098084 | 2.53  | ##### | Up   | 0     | 2.25E-011 |      |  | 0.31  | 0.76      |      | 0.29  | 0.66  |      | S-adenosyl-L-methionine-dependent methyltransferases superfamily protein |
| Pc_TC098085 | -0.29 | 0.78  |      | 0.8   | 0.38      |      |  | -3.13 | 0.05      | Down | -2.74 | 0.02  | Down | Expressed protein                                                        |
| Pc_TC098091 | 1.75  | 0.02  | Up   | 1.08  | 0.23      |      |  | -3.67 | 0.03      | Down | -1.54 | 0.17  |      | AT hook motif-containing protein                                         |
| Pc_TC098092 | -0.2  | 0.72  |      | 0.68  | 0.27      |      |  | -1.77 | 0.1       |      | -1.7  | 0.02  | Down | Expressed protein                                                        |
| Pc_TC098094 | 0     | 1     |      | 1.06  | 0.98      |      |  | 4.31  | 0.04      | Up   | 4.02  | 0.03  | Up   | Expressed protein                                                        |
| Pc_TC098112 | 0.37  | 0.66  |      | 1.1   | 0.19      |      |  | -3.08 | 0.04      | Down | -1.46 | 0.16  |      | OSINBa0061G20.3 protein                                                  |
| Pc_TC098118 | -0.89 | 0.11  |      | -1.38 | 0.04      | Down |  | 0.75  | 0.45      |      | 0.15  | 0.83  |      | Expressed protein                                                        |
| Pc_TC098132 | -0.73 | 0.53  |      | 0.75  | 0.47      |      |  | -1.89 | 0.23      |      | -2.77 | 0.04  | Down | Expressed protein                                                        |
| Pc_TC098137 | 1.84  | 0     | Up   | 0     | 6.86E-006 |      |  | 1.49  | 0.17      |      | -0.16 | 0.86  |      | Uncharacterized protein (Fragment)                                       |
| Pc_TC098153 | -0.34 | 0.71  |      | 1.59  | 0.04      | Up   |  | -2.12 | 0.12      |      | -1.45 | 0.15  |      | eukaryotic elongation factor 5A-3                                        |
| Pc_TC098154 | 1.32  | 0     | Up   | 0.97  | 0.08      |      |  | -0.92 | 0.36      |      | 1.19  | 0.05  | Up   | Expressed protein                                                        |
| Pc_TC098163 | 0.47  | 0.39  |      | 0.74  | 0.25      |      |  | -3.74 | 0         | Down | -2.36 | 0     | Down | Expressed protein                                                        |
| Pc_TC098164 | -0.7  | 0.38  |      | -0.91 | 0.32      |      |  | -1.32 | 0.29      |      | -2.2  | 0.02  | Down | Expressed protein                                                        |
| Pc_TC098173 | -0.1  | 0.91  |      | 0.1   | 0.92      |      |  | -5.02 | 0         | Down | -2.58 | 0.01  | Down | Expressed protein                                                        |
| Pc_TC098182 | -2.88 | 0     | Down | -0.68 | 0.36      |      |  | 0.9   | 0.39      |      | 0.16  | 0.83  |      | receptor like protein 56                                                 |
| Pc_TC098190 | 1.52  | 0.02  | Up   | 0     | 5.43E-005 |      |  | 1.52  | 0.17      |      | -0.54 | 0.56  |      | Expressed protein                                                        |
| Pc_TC098205 | -2.11 | 0.05  | Down | -1.62 | 0.15      |      |  | 0.88  | 0.47      |      | 0.53  | 0.57  |      | Expressed protein                                                        |
| Pc_TC098216 | -1.86 | 0.12  |      | -1.01 | 0.41      |      |  | -0.93 | 0.53      |      | -2.9  | 0.03  | Down | Expressed protein                                                        |
| Pc_TC098217 | -0.81 | 0.21  |      | -0.24 | 0.75      |      |  | -1.48 | 0.19      |      | -1.72 | 0.03  | Down | Expressed protein                                                        |
| Pc_TC098224 | 1.73  | 0.14  |      | 2.57  | 0.02      | Up   |  | 0.02  | 1         |      | -0.86 | 0.69  |      | Expressed protein                                                        |
| Pc_TC098230 | 0.58  | 0.42  |      | 1.53  | 0.04      | Up   |  | 0.8   | 0.48      |      | 0.79  | 0.33  |      | Expressed protein                                                        |

|             |       |       |      |       |           |      |       |           |      |       |      |      |                                                                     |
|-------------|-------|-------|------|-------|-----------|------|-------|-----------|------|-------|------|------|---------------------------------------------------------------------|
| Pc_TC098241 | 0.38  | 0.55  |      | 0.33  | 0.66      |      | -2.67 | 0.03      | Down | -1.06 | 0.19 |      | Expressed protein                                                   |
| Pc_TC098254 | -0.64 | 0.32  |      | 0.59  | 0.39      |      | -2.91 | 0.02      | Down | -1.2  | 0.12 |      | Expressed protein                                                   |
| Pc_TC098264 | 0.29  | 0.66  |      | 0.31  | 0.68      |      | 1.69  | 0.11      |      | 1.65  | 0.02 | Up   | Expressed protein                                                   |
| Pc_TC098274 | -0.22 | 0.76  |      | 0.35  | 0.65      |      | 0     | 2.53E-005 |      | -2.11 | 0.02 | Down | Expressed protein                                                   |
| Pc_TC098275 | -0.46 | 0.47  |      | -1.53 | 0.05      | Down | 0.18  | 0.87      |      | -0.21 | 0.78 |      | Expressed protein                                                   |
| Pc_TC098281 | -2.42 | 0.02  | Down | -0.51 | 0.63      |      | -0.73 | 0.59      |      | 0.56  | 0.54 |      | Uncharacterized protein                                             |
| Pc_TC098289 | 2.27  | 0.01  | Up   | 0     | 0.04      |      | 1.65  | 0.23      |      | -1.37 | 0.37 |      | Expressed protein                                                   |
| Pc_TC098291 | 1     | 0.21  |      | 1.73  | 0.04      | Up   | -1    | 0.48      |      | 0.33  | 0.75 |      | Putative EIN2                                                       |
| Pc_TC098300 | -1.71 | 0.03  | Down | -2.73 | 0.01      | Down | 0.84  | 0.45      |      | -0.31 | 0.71 |      | Expressed protein                                                   |
| Pc_TC098310 | -3.05 | 0     | Down | 0.32  | 0.69      |      | -2.54 | 0.05      | Down | -0.83 | 0.32 |      | Expressed protein                                                   |
| Pc_TC098321 | -0.41 | 0.91  |      | 0.95  | 0.55      |      | 3.83  | 0         | Up   | 2.72  | 0.01 | Up   | Expressed protein                                                   |
| Pc_TC098322 | -0.45 | 0.63  |      | -0.2  | 0.86      |      | -4.67 | 0.01      | Down | -2.37 | 0.03 | Down | Expressed protein                                                   |
| Pc_TC098328 | 0.73  | 0.14  |      | 0.76  | 0.21      |      | -2.52 | 0.02      | Down | -0.33 | 0.63 |      | Expressed protein                                                   |
| Pc_TC098329 | 3.4   | 0.1   |      | 4.15  | 0.03      | Up   | 0.5   | 1         |      | -0.37 | 1    |      | Expressed protein                                                   |
| Pc_TC098334 | 0.8   | 0.42  |      | 2.14  | 0.02      | Up   | 0.46  | 0.77      |      | 1.15  | 0.25 |      | Expressed protein                                                   |
| Pc_TC098342 | -0.53 | 0.56  |      | -0.67 | 0.51      |      | 2.35  | 0.04      | Up   | 0.93  | 0.27 |      | Jojoba acyl CoA reductase-related male sterility protein            |
| Pc_TC098345 | 0.5   | 0.43  |      | 1.07  | 0.13      |      | -4.65 | 0         | Down | -0.94 | 0.24 |      | Expressed protein                                                   |
| Pc_TC098356 | 0.41  | 0.42  |      | 0.39  | 0.53      |      | -2.41 | 0.03      | Down | -1.39 | 0.05 | Down | Expressed protein                                                   |
| Pc_TC098361 | 1.22  | 0.09  |      | 1.94  | 0.01      | Up   | -2.29 | 0.1       |      | -1.62 | 0.11 |      | Expressed protein                                                   |
| Pc_TC098362 | 1.66  | 0.13  |      | 2.96  | 0         | Up   | -0.69 | 0.77      |      | 1.48  | 0.23 |      | lecithin:cholesterol acyltransferase 3                              |
| Pc_TC098372 | 0.72  | 0.41  |      | 2.1   | 0.01      | Up   | -2.44 | 0.13      |      | -0.09 | 0.97 |      | Expressed protein                                                   |
| Pc_TC098373 | 0.71  | 0.16  |      | 0.83  | 0.17      |      | -3.13 | 0.01      | Down | -0.89 | 0.2  |      | Expressed protein                                                   |
| Pc_TC098388 | 0.15  | 0.83  |      | 0.82  | 0.24      |      | -1.95 | 0.1       |      | -2.64 | 0    | Down | Expressed protein                                                   |
| Pc_TC098413 | 0.14  | 0.83  |      | 0.6   | 0.38      |      | -2.34 | 0.05      | Down | -1.44 | 0.07 |      | Expressed protein                                                   |
| Pc_TC098417 | -0.53 | 0.61  |      | -0.94 | 0.42      |      | 2.12  | 0.07      |      | 1.73  | 0.04 | Up   | Expressed protein                                                   |
| Pc_TC098418 | 0.71  | 0.35  |      | 1.6   | 0.04      | Up   | -0.94 | 0.47      |      | -0.49 | 0.61 |      | Expressed protein                                                   |
| Pc_TC098419 | 2.04  | ##### | Up   | 0     | 8.41E-010 |      | 1.5   | 0.13      |      | 0.12  | 0.87 |      | Ribosomal protein L24e family protein                               |
| Pc_TC098431 | 0.13  | 0.92  |      | 1.93  | 0.02      | Up   | -2.82 | 0.07      |      | -1.47 | 0.17 |      | UDP-glucosyltransferase 74F2                                        |
| Pc_TC098432 | 2.19  | 0.01  | Up   | 1.68  | 0.12      |      | -0.08 | 1         |      | -0.5  | 0.76 |      | Putative uncharacterized protein                                    |
| Pc_TC098438 | 1.44  | 0.12  |      | 2.01  | 0.04      | Up   | -1.13 | 0.51      |      | 0.77  | 0.5  |      | Expressed protein                                                   |
| Pc_TC098447 | -0.76 | 0.2   |      | 0.08  | 0.91      |      | -3.58 | 0         | Down | -2.5  | 0    | Down | Expressed protein                                                   |
| Pc_TC098462 | 0.5   | 0.24  |      | 0.7   | 0.18      |      | -3.72 | 0         | Down | -1.94 | 0    | Down | Uncharacterized protein                                             |
| Pc_TC098465 | 0.01  | 1     |      | 0.54  | 0.46      |      | -1.83 | 0.12      |      | -1.66 | 0.05 | Down | Expressed protein                                                   |
| Pc_TC098484 | -0.48 | 0.54  |      | -0.43 | 0.64      |      | 0     | 0         |      | -3.18 | 0    | Down | Expressed protein                                                   |
| Pc_TC098508 | 2.58  | 0.02  | Up   | 0.93  | 0.59      |      | 1.24  | 0.48      |      | 1.29  | 0.37 |      | Expressed protein                                                   |
| Pc_TC098520 | -0.23 | 0.74  |      | -0.54 | 0.49      |      | 2.16  | 0.04      | Up   | 1.07  | 0.13 |      | Expressed protein                                                   |
| Pc_TC098526 | -3.59 | 0     | Down | -3.03 | 0.01      | Down | -3.17 | 0.02      | Down | -2.73 | 0.01 | Down | Expressed protein                                                   |
| Pc_TC098530 | -0.18 | 0.88  |      | 0.01  | 1         |      | -0.16 | 0.93      |      | -2.28 | 0.05 | Down | Expressed protein                                                   |
| Pc_TC098533 | -0.2  | 0.89  |      | -1.66 | 0.2       |      | -0.16 | 0.93      |      | -2.9  | 0.03 | Down | Expressed protein                                                   |
| Pc_TC098535 | 0.97  | 0.49  |      | 1.25  | 0.38      |      | 2.96  | 0.03      | Up   | 1.82  | 0.13 |      | Putative uncharacterized protein                                    |
| Pc_TC098536 | 3.62  | 0     | Up   | 0     | 0.48      |      | 2.62  | 0.15      |      | -0.96 | 0.86 |      | Thiamin diphosphate-binding fold (THDP-binding) superfamily protein |
| Pc_TC098537 | 0.54  | 0.31  |      | 0.79  | 0.21      |      | -2.29 | 0.04      | Down | -1.11 | 0.13 |      | ACT domain repeat 8                                                 |
| Pc_TC098542 | -0.59 | 0.3   |      | -1.67 | 0.02      | Down | 0.82  | 0.42      |      | 0.25  | 0.71 |      | Similar to CG4239                                                   |
| Pc_TC098543 | 2.19  | 0     | Up   | 0     | 0         |      | 2.24  | 0.05      |      | 1.56  | 0.06 |      | Expressed protein                                                   |
| Pc_TC098547 | 1.2   | 0.02  | Up   | 0     | 5.50E-009 |      | 1.41  | 0.17      |      | 0.11  | 0.89 |      | Expressed protein                                                   |
| Pc_TC098550 | -0.42 | 0.47  |      | 0.65  | 0.31      |      | -2.5  | 0.03      | Down | -2.28 | 0    | Down | Expressed protein                                                   |
| Pc_TC098574 | 0.29  | 0.54  |      | 1.27  | 0.02      | Up   | -0.68 | 0.49      |      | 0.05  | 0.94 |      | Expressed protein                                                   |
| Pc_TC098580 | -1.23 | 0.17  |      | -3.33 | 0.01      | Down | 0.41  | 0.74      |      | 0.48  | 0.58 |      | Expressed protein                                                   |
| Pc_TC098582 | -0.84 | 0.51  |      | -3.03 | 0.08      |      | 2.43  | 0.05      | Up   | 0.49  | 0.67 |      | Expressed protein                                                   |
| Pc_TC098584 | -2.07 | 0.01  | Down | -1.26 | 0.14      |      | 0.36  | 0.75      |      | 0.6   | 0.43 |      | Expressed protein                                                   |
| Pc_TC098602 | -1.09 | 0.18  |      | -2.37 | 0.02      | Down | 2.24  | 0.04      | Up   | 0.8   | 0.31 |      | putative protein kinase (AME2/AFC1)                                 |
| Pc_TC098607 | -2.73 | 0.05  | Down | -0.43 | 0.75      |      | 0.32  | 0.84      |      | -2.77 | 0.04 | Down | Expressed protein                                                   |
| Pc_TC098616 | 0.13  | 0.81  |      | 0.49  | 0.44      |      | -3.44 | 0         | Down | -2.68 | 0    | Down | Expressed protein                                                   |
| Pc_TC098622 | 0.53  | 0.34  |      | 0.75  | 0.25      |      | -2.38 | 0.04      | Down | -1.11 | 0.14 |      | Expressed protein                                                   |
| Pc_TC098646 | 1.42  | 0.12  |      | 2.28  | 0.01      | Up   | 0     | 0.02      |      | -4.28 | 0.02 | Down | Expressed protein                                                   |
| Pc_TC098656 | -2.92 | 0.01  | Down | -0.48 | 0.66      |      | -0.91 | 0.5       |      | -1.37 | 0.19 |      | Expressed protein                                                   |
| Pc_TC098658 | 0.09  | 0.87  |      | 0.38  | 0.54      |      | -2.1  | 0.05      |      | -1.39 | 0.05 | Down | Expressed protein                                                   |
| Pc_TC098659 | 2.94  | 0.01  | Up   | 0     | 0.36      |      | 2.9   | 0.07      |      | 1.95  | 0.19 |      | Expressed protein                                                   |
| Pc_TC098723 | 0.22  | 0.74  |      | 1.26  | 0.06      |      | -3.32 | 0.01      | Down | -1.39 | 0.08 |      | Uncharacterized protein                                             |
| Pc_TC098725 | -1.22 | 0.09  |      | 0.78  | 0.28      |      | -1.09 | 0.34      |      | -2.63 | 0    | Down | HEAT SHOCK PROTEIN 81.4                                             |
| Pc_TC098731 | -0.86 | 0.41  |      | -0.89 | 0.46      |      | -1.44 | 0.32      |      | -3.43 | 0.01 | Down | Expressed protein                                                   |
| Pc_TC098760 | -0.55 | 0.5   |      | -0.53 | 0.58      |      | -2.91 | 0.04      | Down | -1.37 | 0.15 |      | Expressed protein                                                   |

|             |       |      |      |       |           |      |       |           |      |       |       |      |                                                          |                 |
|-------------|-------|------|------|-------|-----------|------|-------|-----------|------|-------|-------|------|----------------------------------------------------------|-----------------|
| Pc_TC098762 | -1.28 | 0.31 |      | -1.11 | 0.42      |      | 2.63  | 0.03      | Up   | 1.74  | 0.06  |      | Expressed protein                                        |                 |
| Pc_TC098763 | -3.48 | 0    | Down | -3.5  | 0         | Down | -1.59 | 0.22      |      | -1.12 | 0.23  |      | Concanavalin A-like lectin protein kinase family protein |                 |
| Pc_TC098770 | -3.03 | 0    | Down | -2.37 | 0.03      | Down | -4.92 | 0         | Down | -3.48 | 0     | Down | Expressed protein                                        |                 |
| Pc_TC098771 | 0.3   | 0.95 |      | 0.06  | 1         |      | 3.74  | 0.01      | Up   | 1.21  | 0.41  |      | RNA binding;RNA binding                                  |                 |
| Pc_TC098772 | -3.34 | 0.01 | Down | -2.36 | 0.05      |      | 0.55  | 0.67      |      | 0.8   | 0.37  |      | RNA binding;RNA binding                                  |                 |
| Pc_TC098785 | 0.56  | 0.37 |      | 0.92  | 0.19      |      | -2.72 | 0.03      | Down | -2.94 | 0     | Down | Expressed protein                                        |                 |
| Pc_TC098786 | 0.75  | 0.25 |      | 2.45  | 0         | Up   | -1.35 | 0.26      |      | -0.89 | 0.3   |      | Expressed protein                                        |                 |
| Pc_TC098795 | 2.78  | 0.1  |      | 3.45  | 0.03      | Up   | 2.59  | 0.22      |      | 2.21  | 0.26  |      | Expressed protein                                        |                 |
| Pc_TC098797 | 0.36  | 0.32 |      | 0.44  | 0.35      |      | -1.77 | 0.06      |      | -1.11 | 0.05  | Down | Expressed protein                                        |                 |
| Pc_TC098815 | 0.3   | 0.66 |      | -0.32 | 0.7       |      | -2.88 | 0.03      | Down | -0.89 | 0.28  |      | Putative protein                                         |                 |
| Pc_TC098825 | -1.55 | 0.13 |      | -2.57 | 0.04      | Down | -1.2  | 0.38      |      | -1.08 | 0.3   |      | Expressed protein                                        |                 |
| Pc_TC098835 | -1.28 | 0.26 |      | -2.14 | 0.11      |      | -3.02 | 0.07      |      | -4.9  | 0     | Down | Expressed protein                                        |                 |
| Pc_TC098839 | -0.61 | 0.47 |      | -0.09 | 0.95      |      | -0.37 | 0.78      |      | -2.18 | 0.04  | Down | Expressed protein                                        |                 |
| Pc_TC098840 | -0.05 | 1    |      | 0.93  | 0.33      |      | 0     | 0         |      | -2.64 | 0.04  | Down | Expressed protein                                        |                 |
| Pc_TC098841 | 1.54  | 0.34 |      | 3.01  | 0.02      | Up   | 0     | 0.26      |      | -0.79 | 0.84  |      | Expressed protein                                        |                 |
| Pc_TC098847 | 3     | 0.01 | Up   | 0     | 0.27      |      | 2.09  | 0.2       |      | -0.37 | 0.96  |      | late embryogenesis abundant protein                      |                 |
| Pc_TC098866 | 0.64  | 0.1  |      | -0.38 | 0.46      |      | -0.28 | 0.76      |      | 1.14  | 0.04  | Up   | Expressed protein                                        |                 |
| Pc_TC098872 | 0.41  | 0.61 |      | 0.63  | 0.47      |      | 2.39  | 0.03      | Up   | 0.89  | 0.29  |      | Uncharacterized protein                                  |                 |
| Pc_TC098885 | 0.17  | 0.8  |      | 1.26  | 0.07      |      | -7    | 5.87E-005 | Down | -5.3  | ##### | Down | Expressed protein                                        |                 |
| Pc_TC098899 | 2.6   | 0.04 | Up   | 0     | 0.36      |      | 0.5   | 0.9       |      | -1.37 | 0.66  |      | Expressed protein                                        |                 |
| Pc_TC098900 | 0.35  | 0.64 |      | 0.39  | 0.64      |      | 0     | 0         |      | -4.54 | 0     | Down | Expressed protein                                        |                 |
| Pc_TC098909 | 0.86  | 0.27 |      | 1.31  | 0.13      |      | -3.5  | 0.03      | Down | -3.37 | 0.01  | Down | Expressed protein                                        |                 |
| Pc_TC098913 | 0.74  | 0.27 |      | 2.39  | 0         | Up   | -3.55 | 0.01      | Down | -1.48 | 0.1   |      | Expressed protein                                        |                 |
| Pc_TC098915 | 0.34  | 0.71 |      | 0.64  | 0.5       |      | -3.4  | 0.03      | Down | -0.76 | 0.47  |      | Expressed protein                                        |                 |
| Pc_TC098921 | 0.39  | 0.63 |      | 1.04  | 0.22      |      | -3.12 | 0.04      | Down | -2.26 | 0.04  | Down | OSJNBb0060E08.13 protein                                 |                 |
| Pc_TC098940 | 1.84  | 0    | Up   | 0     | 1.52E-005 |      | 1.39  | 0.21      |      | 0.03  | 1     |      | ribosomal protein L18                                    |                 |
| Pc_TC098946 | 0.62  | 0.14 |      | 0.64  | 0.22      |      | -4.09 | 0         | Down | -0.91 | 0.14  |      | Expressed protein                                        |                 |
| Pc_TC098951 | -1.78 | 0    | Down | -2.85 | 0         | Down | 1.25  | 0.2       |      | -0.21 | 0.76  |      | Expressed protein                                        |                 |
| Pc_TC098958 | 0.4   | 0.48 |      | 1.69  | 0.01      | Up   | -0.99 | 0.35      |      | -0.09 | 0.91  |      | nucleic acid binding;zinc ion binding;DNA binding        | SWI/SNF-BAF6NAb |
| Pc_TC098962 | 0.25  | 0.76 |      | 1.85  | 0.01      | Up   | -1.2  | 0.34      |      | -0.9  | 0.32  |      | Expressed protein                                        |                 |
| Pc_TC098975 | 1.47  | 0.03 | Up   | 0     | 0         |      | 1.54  | 0.17      |      | -0.01 | 1     |      | ATP-citrate lyase B-1                                    |                 |
| Pc_TC098977 | -1.92 | 0.07 |      | -3.94 | 0.01      | Down | 0.2   | 0.89      |      | -1.2  | 0.25  |      | Expressed protein                                        |                 |
| Pc_TC098983 | -0.86 | 0.41 |      | 0.06  | 1         |      | -0.5  | 0.74      |      | -3.43 | 0.01  | Down | Expressed protein                                        |                 |
| Pc_TC098989 | -1.54 | 0.04 | Down | -2.2  | 0.01      | Down | 0.69  | 0.52      |      | -1.8  | 0.03  | Down | Expressed protein                                        |                 |
| Pc_TC098997 | 1.65  | 0.01 | Up   | 0     | 1.33E-005 |      | 1.44  | 0.19      |      | -0.21 | 0.82  |      | glutathione S-transferase PHI 9                          |                 |
| Pc_TC099006 | -1.38 | 0.03 | Down | -0.87 | 0.23      |      | -0.27 | 0.8       |      | -0.27 | 0.71  |      | Expressed protein                                        |                 |
| Pc_TC099033 | 1.83  | 0.01 | Up   | 0     | 0         |      | 1.39  | 0.23      |      | 0.63  | 0.48  |      | Myofilin protein                                         |                 |
| Pc_TC099034 | 2.61  | 0    | Up   | 0     | 0.01      |      | 2.04  | 0.1       |      | 1.02  | 0.3   |      | Myofilin isoform B                                       |                 |
| Pc_TC099035 | 1.35  | 0.02 | Up   | 0     | 4.03E-007 |      | 1.98  | 0.06      |      | 0.87  | 0.23  |      | Similar to CG6803-PB                                     |                 |
| Pc_TC099036 | 1.46  | 0.02 | Up   | 0     | 2.85E-006 |      | 1.99  | 0.06      |      | 0.59  | 0.44  |      | Expressed protein                                        |                 |
| Pc_TC099045 | -2.83 | 0.02 | Down | -1.39 | 0.22      |      | -0.4  | 0.78      |      | -0.82 | 0.43  |      | Expressed protein                                        |                 |
| Pc_TC099048 | 1.15  | 0.03 | Up   | 0.15  | 0.84      |      | 0.57  | 0.58      |      | 1.36  | 0.04  | Up   | Expressed protein                                        |                 |
| Pc_TC099051 | 0.26  | 0.7  |      | -0.02 | 1         |      | -4.82 | 0         | Down | -4.11 | ##### | Down | Expressed protein                                        |                 |
| Pc_TC099053 | 0.4   | 0.42 |      | -0.26 | 0.68      |      | -2.44 | 0.03      | Down | -1.29 | 0.06  |      | Expressed protein                                        |                 |
| Pc_TC099061 | 0.01  | 1    |      | 0.28  | 0.77      |      | -1.6  | 0.22      |      | -2.48 | 0.02  | Down | Expressed protein                                        |                 |
| Pc_TC099069 | -2.78 | 0.02 | Down | -2.8  | 0.03      | Down | -1.35 | 0.34      |      | 0     | 0     |      | Expressed protein                                        |                 |
| Pc_TC099071 | 0     | 1    |      | 0.41  | 0.57      |      | -2.62 | 0.03      | Down | -0.83 | 0.29  |      | Expressed protein                                        |                 |
| Pc_TC099072 | 0.17  | 0.88 |      | 1.77  | 0.03      | Up   | 0     | 0         |      | -4.37 | 0     | Down | ARP protein (REF)                                        |                 |
| Pc_TC099080 | 0.47  | 0.49 |      | 0.55  | 0.48      |      | 1.6   | 0.14      |      | 2.06  | 0     | Up   | Expressed protein                                        |                 |
| Pc_TC099095 | 0.5   | 0.36 |      | 0.48  | 0.47      |      | -3.1  | 0.01      | Down | -1.01 | 0.17  |      | Expressed protein                                        |                 |
| Pc_TC099101 | 1.47  | 0.02 | Up   | 2.31  | 0         | Up   | -1.08 | 0.38      |      | 1.91  | 0.01  | Up   | Expressed protein                                        |                 |
| Pc_TC099104 | -2.86 | 0.03 | Down | -1.14 | 0.36      |      | -0.32 | 0.84      |      | -0.37 | 0.76  |      | Expressed protein                                        |                 |
| Pc_TC099109 | 0.43  | 0.53 |      | 0.62  | 0.42      |      | -3.35 | 0.01      | Down | -2.15 | 0.02  | Down | Uncharacterized protein                                  |                 |
| Pc_TC099114 | -0.56 | 0.29 |      | -1.38 | 0.04      | Down | 0.06  | 0.95      |      | 0.08  | 0.91  |      | Expressed protein                                        |                 |
| Pc_TC099142 | -2.05 | 0.05 | Down | -1.07 | 0.31      |      | 0.87  | 0.47      |      | 0.2   | 0.85  |      | Expressed protein                                        |                 |
| Pc_TC099147 | 0.63  | 0.32 |      | 1.42  | 0.04      | Up   | -3.01 | 0.02      | Down | -2.24 | 0.01  | Down | Expressed protein                                        |                 |
| Pc_TC099150 | 0.67  | 0.25 |      | 0.46  | 0.52      |      | 1.44  | 0.16      |      | 1.81  | 0.01  | Up   | Expressed protein                                        |                 |
| Pc_TC099152 | -1.84 | 0    | Down | -1.18 | 0.05      | Down | -1.1  | 0.26      |      | -1.11 | 0.08  |      | Expressed protein                                        |                 |
| Pc_TC099154 | 0.75  | 0.23 |      | 0.92  | 0.2       |      | -2.89 | 0.02      | Down | -1.01 | 0.22  |      | Expressed protein                                        |                 |
| Pc_TC099164 | -1.32 | 0.05 | Down | -0.59 | 0.43      |      | -2.87 | 0.02      | Down | -3.36 | 0     | Down | photosystem II light harvesting complex gene 2.3         |                 |
| Pc_TC099165 | 1.79  | 0.12 |      | 2.57  | 0.02      | Up   | 0.5   | 0.83      |      | 0.52  | 0.78  |      | Expressed protein                                        |                 |
| Pc_TC099177 | -0.19 | 0.77 |      | -1.68 | 0.04      | Down | 0.95  | 0.36      |      | 0.24  | 0.75  |      | Expressed protein                                        |                 |

|             |       |      |      |       |           |      |       |           |      |       |       |      |                                                   |      |
|-------------|-------|------|------|-------|-----------|------|-------|-----------|------|-------|-------|------|---------------------------------------------------|------|
| Pc_TC099178 | -0.23 | 0.56 |      | -0.46 | 0.37      |      | -2.22 | 0.02      | Down | -1.03 | 0.07  |      | Expressed protein                                 |      |
| Pc_TC099181 | 2.12  | 0    | Up   | 0     | 8.53E-005 |      | 1.58  | 0.16      |      | 0.25  | 0.79  |      | Expressed protein                                 | bZIP |
| Pc_TC099185 | 0.02  | 1    |      | -0.72 | 0.55      |      | 2.53  | 0.03      | Up   | 1.11  | 0.23  |      | Expressed protein                                 |      |
| Pc_TC099206 | 0.19  | 0.68 |      | 0.95  | 0.08      |      | -2.81 | 0.01      | Down | -1.62 | 0.01  | Down | Expressed protein                                 |      |
| Pc_TC099248 | 0.59  | 0.16 |      | 1.53  | 0         | Up   | -2.4  | 0.02      | Down | -0.11 | 0.86  |      | Expressed protein                                 |      |
| Pc_TC099274 | 2.66  | 0.03 | Up   | 1.96  | 0.21      |      | 1.67  | 0.38      |      | 0.21  | 1     |      | Expressed protein                                 |      |
| Pc_TC099300 | -1.32 | 0.08 |      | -1.06 | 0.21      |      | 0.19  | 0.88      |      | -2.5  | 0.01  | Down | Expressed protein                                 |      |
| Pc_TC099313 | -2.51 | 0.05 | Down | -2.94 | 0.04      | Down | 0.87  | 0.5       |      | 0.04  | 1     |      | Expressed protein                                 |      |
| Pc_TC099327 | 0.2   | 0.84 |      | 0.49  | 0.6       |      | -3.26 | 0.03      | Down | -0.82 | 0.42  |      | Expressed protein                                 |      |
| Pc_TC099337 | 0.21  | 0.7  |      | -0.13 | 0.85      |      | -2.62 | 0.02      | Down | -2.37 | 0     | Down | Putative gag-pol polyprotein                      |      |
| Pc_TC099338 | 0.15  | 0.7  |      | 0.06  | 0.91      |      | -1.62 | 0.09      |      | -1.17 | 0.04  | Down | Expressed protein                                 |      |
| Pc_TC099341 | 0.66  | 0.72 |      | 2.52  | 0.04      | Up   | -2.08 | 0.43      |      | 0     | 0.11  |      | Expressed protein                                 |      |
| Pc_TC099349 | -1.67 | 0.03 | Down | -1.53 | 0.07      |      | 1.54  | 0.15      |      | 0.58  | 0.44  |      | Expressed protein                                 |      |
| Pc_TC099356 | 2.78  | 0    | Up   | 1.64  | 0.15      |      | 0.09  | 1         |      | 0.47  | 0.76  |      | starch branching enzyme 2.1                       |      |
| Pc_TC099357 | 0.86  | 0.12 |      | 0.1   | 0.89      |      | -2.92 | 0.01      | Down | -1.66 | 0.03  | Down | starch branching enzyme 2.2                       |      |
| Pc_TC099358 | -1.15 | 0.01 | Down | -1    | 0.08      |      | -0.56 | 0.56      |      | -1.2  | 0.05  |      | starch branching enzyme 2.2                       |      |
| Pc_TC099372 | 0.22  | 0.75 |      | 0.93  | 0.2       |      | -2.94 | 0.02      | Down | -2.72 | 0     | Down | Expressed protein                                 |      |
| Pc_TC099381 | 0.72  | 0.22 |      | 1.95  | 0         | Up   | -3.25 | 0.01      | Down | -3.13 | 0     | Down | Expressed protein                                 |      |
| Pc_TC099390 | 0.31  | 0.48 |      | 0.76  | 0.15      |      | -2.03 | 0.04      | Down | -0.5  | 0.42  |      | Expressed protein                                 |      |
| Pc_TC099402 | -3.05 | 0.01 | Down | 0.63  | 0.49      |      | -3.63 | 0.02      | Down | 0.02  | 1     |      | Putative uncharacterized protein                  |      |
| Pc_TC099412 | 0.6   | 0.2  |      | -0.7  | 0.27      |      | 1.33  | 0.16      |      | 2.29  | ##### | Up   | Uncharacterized protein                           |      |
| Pc_TC099429 | -2.73 | 0.01 | Down | -1.56 | 0.11      |      | 1.04  | 0.36      |      | -0.63 | 0.49  |      | PHYTOENE SYNTHASE                                 |      |
| Pc_TC099430 | 0.26  | 0.74 |      | 0.85  | 0.29      |      | -3.39 | 0.02      | Down | -1.62 | 0.09  |      | Expressed protein                                 |      |
| Pc_TC099437 | 1.89  | 0.01 | Up   | 0     | 0         |      | 1.4   | 0.25      |      | 0.07  | 0.99  |      | Serine protease inhibitor (SERPIN) family protein |      |
| Pc_TC099443 | 1.63  | 0.01 | Up   | 0     | 3.22E-006 |      | 0.96  | 0.38      |      | -0.46 | 0.58  |      | Ribosomal protein S14p/S29e family protein        |      |
| Pc_TC099448 | 2.44  | 0.02 | Up   | 0     | 0.15      |      | 1.45  | 0.37      |      | -0.18 | 1     |      | Expressed protein                                 |      |
| Pc_TC099456 | -0.64 | 0.46 |      | 0.56  | 0.53      |      | -3.53 | 0.02      | Down | -2.03 | 0.05  | Down | Expressed protein                                 |      |
| Pc_TC099457 | -0.28 | 0.61 |      | -0.32 | 0.63      |      | -1.99 | 0.07      |      | -1.56 | 0.03  | Down | Uncharacterized protein                           |      |
| Pc_TC099458 | 2.22  | 0    | Up   | 0     | 0         |      | 1.8   | 0.14      |      | 0.66  | 0.52  |      | Expressed protein                                 |      |
| Pc_TC099473 | 0.08  | 1    |      | 0.64  | 0.84      |      | 2.46  | 0.14      |      | 2.67  | 0.04  | Up   | Expressed protein                                 |      |
| Pc_TC099476 | 0.71  | 0.08 |      | 0.84  | 0.1       |      | -8.06 | 1.26E-008 | Down | -3.3  | ##### | Down | Putative uncharacterized protein P0458G06.123     |      |
| Pc_TC099482 | -2.98 | 0.02 | Down | -1.78 | 0.16      |      | -0.5  | 0.74      |      | 0.11  | 0.95  |      | Expressed protein                                 |      |
| Pc_TC099488 | 0.56  | 0.48 |      | 0.18  | 0.88      |      | 0     | 0         |      | -2.18 | 0.05  | Down | glutamine synthase clone F11                      |      |
| Pc_TC099508 | -1.41 | 0.03 | Down | -1.17 | 0.12      |      | 0.55  | 0.6       |      | 0.4   | 0.57  |      | Expressed protein                                 |      |
| Pc_TC099516 | -0.32 | 0.73 |      | 0.71  | 0.42      |      | -3.12 | 0.04      | Down | -2.26 | 0.04  | Down | Expressed protein                                 |      |
| Pc_TC099527 | 0.48  | 0.18 |      | 0.72  | 0.11      |      | -3.19 | 0         | Down | -1.61 | 0     | Down | Expressed protein                                 |      |
| Pc_TC099539 | 1.66  | 0.04 | Up   | 0.93  | 0.38      |      | 0.58  | 0.69      |      | -0.37 | 0.78  |      | Putative uncharacterized protein                  |      |
| Pc_TC099548 | -1.3  | 0.38 |      | -2.06 | 0.24      |      | -0.74 | 0.68      |      | -4.08 | 0.04  | Down | Expressed protein                                 |      |
| Pc_TC099563 | 1.1   | 0.13 |      | 1.81  | 0.02      | Up   | 1.84  | 0.11      |      | 2.04  | 0.01  | Up   | Expressed protein                                 |      |
| Pc_TC099566 | 0.12  | 0.92 |      | -0.33 | 0.75      |      | -3.16 | 0.03      | Down | -1.04 | 0.29  |      | Expressed protein                                 |      |
| Pc_TC099577 | 0.33  | 0.53 |      | 0.23  | 0.72      |      | -2.23 | 0.04      | Down | -1.79 | 0.01  | Down | Expressed protein                                 |      |
| Pc_TC099586 | -0.63 | 0.51 |      | 0.94  | 0.3       |      | 0     | 0         |      | -2.33 | 0.04  | Down | Expressed protein                                 |      |
| Pc_TC099599 | -0.45 | 0.44 |      | 0.3   | 0.65      |      | -3.6  | 0         | Down | -3.33 | ##### | Down | Expressed protein                                 |      |
| Pc_TC099633 | -0.14 | 0.81 |      | -0.47 | 0.47      |      | -3.85 | 0         | Down | -3.54 | ##### | Down | Expressed protein                                 |      |
| Pc_TC099640 | 0.31  | 0.59 |      | 0.15  | 0.83      |      | -1.1  | 0.31      |      | -1.7  | 0.02  | Down | Expressed protein                                 |      |
| Pc_TC099649 | 0.36  | 0.39 |      | 0.61  | 0.24      |      | -2.36 | 0.02      | Down | -1.62 | 0.01  | Down | Expressed protein                                 |      |
| Pc_TC099650 | -1.04 | 0.25 |      | -2.42 | 0.03      | Down | 0.74  | 0.54      |      | -0.62 | 0.52  |      | Expressed protein                                 |      |
| Pc_TC099660 | 2.49  | 0.01 | Up   | 0     | 0.09      |      | 2.54  | 0.06      |      | -0.54 | 0.78  |      | Expressed protein                                 |      |
| Pc_TC099667 | -1.57 | 0.03 | Down | -1.31 | 0.11      |      | 1.4   | 0.19      |      | 0.38  | 0.62  |      | Expressed protein                                 |      |
| Pc_TC099689 | -1.12 | 0.31 |      | -2.88 | 0.05      | Down | 0.15  | 0.94      |      | -1.09 | 0.35  |      | Expressed protein                                 |      |
| Pc_TC099709 | 1.01  | 0.08 |      | -1.32 | 0.1       |      | 0.64  | 0.55      |      | 2.21  | 0     | Up   | Expressed protein                                 |      |
| Pc_TC099713 | 0.26  | 0.72 |      | 1.63  | 0.03      | Up   | -0.86 | 0.48      |      | -1.23 | 0.17  |      | Expressed protein                                 |      |
| Pc_TC099727 | 1.02  | 0.08 |      | 1.08  | 0.12      |      | -2.58 | 0.04      | Down | 0.07  | 0.93  |      | Expressed protein                                 |      |
| Pc_TC099735 | 0.72  | 0.19 |      | 1.48  | 0.02      | Up   | -3.23 | 0.01      | Down | -0.85 | 0.24  |      | Expressed protein                                 |      |
| Pc_TC099749 | -0.32 | 0.67 |      | 0.43  | 0.58      |      | -2    | 0.1       |      | -2.13 | 0.02  | Down | Expressed protein                                 |      |
| Pc_TC099775 | 3.73  | 0    | Up   | 1.91  | 0.18      |      | 0.88  | 0.69      |      | 2.98  | 0.01  | Up   | Expressed protein                                 |      |
| Pc_TC099791 | 1.28  | 0.07 |      | 0.53  | 0.56      |      | -3.67 | 0.02      | Down | 0.41  | 0.66  |      | Expressed protein                                 |      |
| Pc_TC099810 | -1.52 | 0.03 | Down | -1.05 | 0.19      |      | 0.59  | 0.58      |      | -0.19 | 0.81  |      | Os01g0180700 protein (Fragment)                   |      |
| Pc_TC099818 | 0     | 1    |      | -0.15 | 0.9       |      | -3.12 | 0.04      | Down | -1.78 | 0.09  |      | Expressed protein                                 |      |
| Pc_TC099822 | -0.68 | 0.54 |      | 0.99  | 0.31      |      | -3.96 | 0.03      | Down | -0.83 | 0.48  |      | slufate transporter 2;1                           |      |
| Pc_TC099832 | -0.78 | 0.34 |      | -1.31 | 0.18      |      | 1.21  | 0.28      |      | 1.55  | 0.04  | Up   | Expressed protein                                 |      |
| Pc_TC099840 | 2.08  | 0.04 | Up   | 0     | 0.09      |      | 1.66  | 0.26      |      | 0.46  | 0.79  |      | Expressed protein                                 |      |

|             |       |       |      |       |           |       |       |           |       |       |                   |                      |                                                                            |
|-------------|-------|-------|------|-------|-----------|-------|-------|-----------|-------|-------|-------------------|----------------------|----------------------------------------------------------------------------|
| Pc_TC099841 | 1.39  | 0.05  | Up   | 0     | 0         | 0.56  | 0.65  | -0.26     | 0.8   |       | Expressed protein |                      |                                                                            |
| Pc_TC099845 | -0.78 | 0.43  |      | 1.2   | 0.17      | -1.18 | 0.4   | -4.23     | 0     | Down  | Expressed protein |                      |                                                                            |
| Pc_TC099851 | 1.43  | 0.16  |      | 2.15  | 0.04      | Up    | -0.63 | 0.75      | 0     | 0.02  | Expressed protein |                      |                                                                            |
| Pc_TC099852 | -2.35 | 0.02  | Down | -3.78 | 0         | Down  | -0.2  | 0.89      | -0.89 | 0.34  | Expressed protein |                      |                                                                            |
| Pc_TC099860 | -0.35 | 0.72  |      | -0.09 | 0.97      |       | 0     | 0         | -3.74 | 0     | Down              | frataxin homolog     |                                                                            |
| Pc_TC099865 | -2.86 | 0.03  | Down | -0.3  | 0.83      |       | 0.41  | 0.78      | 0.96  | 0.31  | Expressed protein |                      |                                                                            |
| Pc_TC099867 | -2.92 | 0.03  | Down | -2.94 | 0.04      | Down  | -3.5  | 0.04      | Down  | -2.15 | 0.08              | Os03g0659400 protein |                                                                            |
| Pc_TC099868 | 0.77  | 0.29  |      | 0.97  | 0.24      |       | -2.89 | 0.04      | Down  | -1.77 | 0.08              | Expressed protein    |                                                                            |
| Pc_TC099876 | 6.45  | ##### | Up   | 0     | 0.09      |       | 4.91  | 0         | Up    | 3.77  | #####             | Up                   | Expressed protein                                                          |
| Pc_TC099883 | 0.41  | 0.68  |      | 0.62  | 0.55      |       | -3.02 | 0.07      |       | -2.9  | 0.03              | Down                 | Expressed protein                                                          |
| Pc_TC099923 | -1.53 | 0.02  | Down | -3.52 | 5.07E-005 | Down  | 0.03  | 0.99      | -0.08 | 0.92  |                   |                      | putative recombination initiation defect 1                                 |
| Pc_TC099939 | -0.5  | 0.4   |      | -0.15 | 0.83      |       | 2.38  | 0.02      | Up    | 1.44  | 0.03              | Up                   | Expressed protein                                                          |
| Pc_TC099943 | -1.79 | 0.02  | Down | -1.74 | 0.05      |       | -3.52 | 0.01      | Down  | -3.24 | 0                 | Down                 | Expressed protein                                                          |
| Pc_TC099950 | 0.49  | 0.54  |      | 0.17  | 0.88      |       | 0.99  | 0.4       |       | 1.62  | 0.05              | Up                   | Expressed protein                                                          |
| Pc_TC099971 | 0.08  | 0.93  |      | 0.31  | 0.7       |       | -1.33 | 0.26      |       | -1.76 | 0.05              | Down                 | polypyrimidine tract-binding protein 3                                     |
| Pc_TC099979 | 0.16  | 0.83  |      | 0.35  | 0.66      |       | -2.84 | 0.03      | Down  | -2.03 | 0.03              | Down                 | Expressed protein                                                          |
| Pc_TC099986 | -0.74 | 0.37  |      | -2.14 | 0.04      | Down  | 0.07  | 0.97      |       | -0.37 | 0.69              |                      | Expressed protein                                                          |
| Pc_TC100020 | 0     | ##### |      | -4.43 | 0         | Down  | 0     | 0         |       | -4.87 | 0                 | Down                 | Expressed protein                                                          |
| Pc_TC100022 | 0.01  | 1     |      | 0.39  | 0.57      |       | -3.4  | 0.01      | Down  | -3.04 | 0                 | Down                 | Os02g0824000 protein                                                       |
| Pc_TC100025 | 0.47  | 0.51  |      | 2.08  | 0         | Up    | -6.25 | 0         | Down  | -2.04 | 0.03              | Down                 | Expressed protein                                                          |
| Pc_TC100026 | 0.62  | 0.22  |      | 1.12  | 0.06      |       | -2.26 | 0.04      | Down  | -1.27 | 0.07              |                      | Os08g0290400 protein                                                       |
| Pc_TC100030 | -1.09 | 0.29  |      | -3.11 | 0.03      | Down  | -3.25 | 0.05      | Down  | -3.13 | 0.02              | Down                 | Ribosomal protein S10p/S20e family protein                                 |
| Pc_TC100032 | 0.93  | 0.01  |      | 0.6   | 0.21      |       | -2.83 | 0         | Down  | -1.73 | 0                 | Down                 | Cytochrome P450 superfamily protein                                        |
| Pc_TC100035 | 1.85  | 0     | Up   | 0     | 5.01E-007 |       | 1.51  | 0.15      |       | 0.07  | 0.95              |                      | Ribosomal protein S3 family protein                                        |
| Pc_TC100036 | -2.51 | 0.05  | Down | -1.94 | 0.14      |       | -1.08 | 0.46      |       | -0.37 | 0.75              |                      | Expressed protein                                                          |
| Pc_TC100044 | -0.7  | 0.52  |      | -1.53 | 0.22      |       | 2.42  | 0.04      | Up    | 1.02  | 0.27              |                      | Uncharacterized protein                                                    |
| Pc_TC100082 | 0.64  | 0.24  |      | 0.71  | 0.27      |       | -2.35 | 0.04      | Down  | 0.24  | 0.73              |                      | Expressed protein                                                          |
| Pc_TC100089 | 0.66  | 0.27  |      | 0.52  | 0.47      |       | -2.67 | 0.03      | Down  | -1.28 | 0.11              |                      | Expressed protein                                                          |
| Pc_TC100099 | 0.14  | 0.93  |      | -0.36 | 0.78      |       | -4.08 | 0.03      | Down  | -0.96 | 0.4               |                      | Expressed protein                                                          |
| Pc_TC100101 | 0.85  | 0.11  |      | 0.82  | 0.2       |       | -2.76 | 0.02      | Down  | -2.3  | 0                 | Down                 | Expressed protein                                                          |
| Pc_TC100120 | 2.57  | 0     | Up   | 0     | 0.02      |       | 1.48  | 0.27      |       | -1.01 | 0.47              |                      | protein phosphatase 2A subunit A3                                          |
| Pc_TC100129 | 0.59  | 0.61  |      | 1.06  | 0.35      |       | -3.3  | 0.1       |       | -4.18 | 0.03              | Down                 | Expressed protein                                                          |
| Pc_TC100132 | 0     | ##### |      | -4.11 | 0         | Down  | -0.62 | 0.64      |       | 0     | #####             |                      | Expressed protein                                                          |
| Pc_TC100142 | 0.08  | 0.98  |      | 0.97  | 0.31      |       | -4.14 | 0.02      | Down  | -2.43 | 0.05              |                      | Expressed protein                                                          |
| Pc_TC100145 | 0.23  | 0.61  |      | 0.48  | 0.39      |       | -2.32 | 0.03      | Down  | -1.53 | 0.02              | Down                 | Expressed protein                                                          |
| Pc_TC100152 | 0.57  | 0.44  |      | 1.12  | 0.16      |       | -5.05 | 0         | Down  | -1.47 | 0.12              |                      | Expressed protein                                                          |
| Pc_TC100170 | 0.64  | 0.36  |      | 0.98  | 0.21      |       | -4.28 | 0         | Down  | -1.83 | 0.05              |                      | RNA-directed DNA polymerase (reverse transcriptase)-related family protein |
| Pc_TC100171 | -0.77 | 0.53  |      | 0.8   | 0.46      |       | -3.08 | 0.09      |       | -3.54 | 0.03              | Down                 | Expressed protein                                                          |
| Pc_TC100186 | 0.16  | 0.8   |      | 0.74  | 0.27      |       | -2.58 | 0.03      | Down  | -1.19 | 0.12              |                      | Expressed protein                                                          |
| Pc_TC100218 | 0.49  | 0.44  |      | 0.87  | 0.23      |       | -2.93 | 0.02      | Down  | -0.67 | 0.41              |                      | Expressed protein                                                          |
| Pc_TC100220 | -3.97 | ##### | Down | -3.99 | 0         | Down  | -4.54 | 0         | Down  | -5.42 | #####             | Down                 | Expressed protein                                                          |
| Pc_TC100225 | -1.51 | 0.34  |      | 0.64  | 0.63      |       | 2.65  | 0.04      | Up    | -0.79 | 0.61              |                      | AAA-type ATPase family protein                                             |
| Pc_TC100226 | -3.38 | 0.02  | Down | -2.4  | 0.09      |       | -0.87 | 0.56      |       | -0.03 | 1                 |                      | AAA-type ATPase family protein                                             |
| Pc_TC100227 | -3.35 | 0     | Down | -2.24 | 0.03      | Down  | 0.84  | 0.46      |       | -1.04 | 0.25              |                      | AAA-type ATPase family protein                                             |
| Pc_TC100273 | 0.87  | 0.46  |      | -0.4  | 0.85      |       | 2.35  | 0.08      |       | 2.02  | 0.05              | Up                   | Expressed protein                                                          |
| Pc_TC100283 | 0.27  | 0.48  |      | 0.54  | 0.26      |       | -3.28 | 0         | Down  | -1.67 | 0                 | Down                 | Expressed protein                                                          |
| Pc_TC100299 | -2.28 | 0.02  | Down | 0.06  | 0.98      |       | 0.49  | 0.69      |       | 0.4   | 0.66              |                      | Expressed protein                                                          |
| Pc_TC100317 | 0.53  | 0.41  |      | 0.85  | 0.24      |       | -2.48 | 0.05      | Down  | -1.09 | 0.19              |                      | Gag-Pol-related protein                                                    |
| Pc_TC100325 | 0.71  | 0.22  |      | 0.42  | 0.55      |       | -2.63 | 0.03      | Down  | 0.28  | 0.7               |                      | TRAF-like family protein                                                   |
| Pc_TC100326 | -1.25 | 0.02  | Down | 0.06  | 0.93      |       | -0.97 | 0.34      |       | -1.9  | 0.01              | Down                 | TRAF-like family protein                                                   |
| Pc_TC100327 | -0.22 | 0.63  |      | -0.4  | 0.48      |       | -1.16 | 0.23      |       | -1.24 | 0.05              | Down                 | TRAF-like family protein                                                   |
| Pc_TC100331 | 0.21  | 0.79  |      | -0.4  | 0.66      |       | -4.17 | 0.01      | Down  | -2.88 | 0.01              | Down                 | Expressed protein                                                          |
| Pc_TC100334 | 0.12  | 0.88  |      | 0.73  | 0.34      |       | -3.87 | 0.01      | Down  | -2.33 | 0.01              | Down                 | Expressed protein                                                          |
| Pc_TC100342 | -1.12 | 0.12  |      | -1.77 | 0.04      | Down  | 0.76  | 0.48      |       | 0.31  | 0.68              |                      | Expressed protein                                                          |
| Pc_TC100349 | 6.57  | ##### | Up   | 0     | 1         |       | 7.11  | 2.41E-005 | Up    | 5.38  | 0                 | Up                   | Expressed protein                                                          |
| Pc_TC100353 | -0.56 | 0.58  |      | 0.68  | 0.48      |       | 0     | 0         |       | -3.18 | 0.01              | Down                 | Expressed protein                                                          |
| Pc_TC100357 | -0.72 | 0.49  |      | -0.12 | 0.95      |       | -2.39 | 0.12      |       | -2.49 | 0.04              | Down                 | Expressed protein                                                          |
| Pc_TC100358 | -1.35 | 0.04  | Down | -0.73 | 0.33      |       | 0.6   | 0.57      |       | -0.45 | 0.55              |                      | Expressed protein                                                          |
| Pc_TC100383 | 0.41  | 0.26  |      | 0.42  | 0.37      |       | -3.01 | 0         | Down  | -1.68 | 0                 | Down                 | Expressed protein                                                          |
| Pc_TC100394 | -4.05 | 0     | Down | 0     | 0         |       | -5.63 | 0         | Down  | -4.5  | 0                 | Down                 | Actin-like ATPase superfamily protein                                      |
| Pc_TC100399 | 1.66  | 0.28  |      | 3.19  | 0.01      | Up    | 0     | 0.26      |       | 0     | 0.24              |                      | protein,putative,Ty1-copia subclass                                        |
| Pc_TC100403 | 1.65  | 0.02  | Up   | 1.24  | 0.14      |       | 0.52  | 0.68      |       | 2.54  | 0                 | Up                   | Expressed protein                                                          |

|             |       |      |      |       |           |      |  |       |      |      |  |       |      |      |                                                    |
|-------------|-------|------|------|-------|-----------|------|--|-------|------|------|--|-------|------|------|----------------------------------------------------|
| Pc_TC100406 | -1.53 | 0.02 | Down | -0.67 | 0.37      |      |  | -0.27 | 0.81 |      |  | -1.04 | 0.17 |      | Expressed protein                                  |
| Pc_TC100411 | -1.74 | 0.04 | Down | -1.53 | 0.1       |      |  | -0.23 | 0.85 |      |  | -1.42 | 0.11 |      | cysteine-rich RLK (RECEPTOR-like protein kinase) 8 |
| Pc_TC100412 | -1.95 | 0.02 | Down | 0.5   | 0.53      |      |  | -0.67 | 0.57 |      |  | -0.85 | 0.33 |      | cysteine-rich RLK (RECEPTOR-like protein kinase) 8 |
| Pc_TC100417 | -0.92 | 0.38 |      | -0.94 | 0.42      |      |  | 0.2   | 0.91 |      |  | -3.49 | 0.01 | Down | Expressed protein                                  |
| Pc_TC100420 | 0.34  | 0.56 |      | 0.51  | 0.45      |      |  | -2.73 | 0.02 | Down |  | -1.27 | 0.09 |      | Expressed protein                                  |
| Pc_TC100428 | -0.51 | 0.67 |      | 0.52  | 0.64      |      |  | -3.3  | 0.06 |      |  | -3.77 | 0.01 | Down | Putative uncharacterized protein                   |
| Pc_TC100431 | 1.58  | 0.04 | Up   | 0     | 0         |      |  | 0.9   | 0.48 |      |  | -0.77 | 0.49 |      | Expressed protein                                  |
| Pc_TC100460 | 0.58  | 0.33 |      | 0.98  | 0.14      |      |  | -1.51 | 0.18 |      |  | -2.12 | 0.01 | Down | Expressed protein                                  |
| Pc_TC100465 | 0.5   | 0.14 |      | 0.28  | 0.52      |      |  | -2.17 | 0.02 | Down |  | -1.03 | 0.05 |      | Expressed protein                                  |
| Pc_TC100474 | -1.67 | 0    | Down | -0.99 | 0.13      |      |  | -0.42 | 0.68 |      |  | -1.51 | 0.03 | Down | Expressed protein                                  |
| Pc_TC100475 | 0.35  | 0.56 |      | -1.68 | 0.04      | Down |  | 0.62  | 0.56 |      |  | -0.91 | 0.24 |      | Expressed protein                                  |
| Pc_TC100476 | -2.61 | 0    | Down | -0.36 | 0.67      |      |  | 0.4   | 0.73 |      |  | 0     | 1    |      | Expressed protein                                  |
| Pc_TC100486 | -0.73 | 0.4  |      | 1.94  | 0.01      | Up   |  | -3.89 | 0.01 | Down |  | -3.18 | 0.01 | Down | Expressed protein                                  |
| Pc_TC100489 | 0     | 0.01 |      | -4.03 | 0.04      | Down |  | -2    | 0.24 |      |  | -2.46 | 0.09 |      | Ribosomal S17 family protein                       |
| Pc_TC100501 | -0.92 | 0.43 |      | -0.8  | 0.54      |      |  | -1.82 | 0.25 |      |  | -3.7  | 0.02 | Down | Expressed protein                                  |
| Pc_TC100506 | 0.81  | 0.17 |      | 0.54  | 0.44      |      |  | -4.21 | 0    | Down |  | -0.86 | 0.27 |      | Expressed protein                                  |
| Pc_TC100508 | -0.76 | 0.24 |      | 0.67  | 0.33      |      |  | -2.65 | 0.03 | Down |  | -2.65 | 0    | Down | Expressed protein                                  |
| Pc_TC100527 | -0.33 | 0.66 |      | 1.06  | 0.15      |      |  | -1.71 | 0.16 |      |  | -1.87 | 0.04 | Down | Expressed protein                                  |
| Pc_TC100531 | -2.82 | 0    | Down | -3.13 | 0         | Down |  | 0.89  | 0.41 |      |  | -3.15 | 0    | Down | metallopeptidase M24 family protein                |
| Pc_TC100532 | -0.53 | 0.61 |      | 0.11  | 0.95      |      |  | 2.25  | 0.06 |      |  | 1.83  | 0.03 | Up   | metallopeptidase M24 family protein                |
| Pc_TC100533 | -0.14 | 0.89 |      | -3.78 | 0         | Down |  | 3     | 0.01 | Up   |  | 0.27  | 0.78 |      | metallopeptidase M24 family protein                |
| Pc_TC100537 | 2.56  | 0    | Up   | 0.82  | 0.55      |      |  | 1.67  | 0.24 |      |  | 0.7   | 0.61 |      | Putative uncharacterized protein P0470G10.14       |
| Pc_TC100548 | 0.75  | 0.21 |      | 1.07  | 0.12      |      |  | -4.02 | 0    | Down |  | -3.44 | 0    | Down | OSJNba0093F12.13 protein                           |
| Pc_TC100564 | 2.58  | 0    | Up   | 0     | 0         |      |  | 2.58  | 0.03 | Up   |  | -0.44 | 0.71 |      | phosphoserine aminotransferase                     |
| Pc_TC100572 | -0.26 | 0.72 |      | -0.05 | 0.97      |      |  | -1.89 | 0.12 |      |  | -1.88 | 0.03 | Down | Expressed protein                                  |
| Pc_TC100574 | -0.95 | 0.25 |      | -2.1  | 0.04      | Down |  | 0.4   | 0.74 |      |  | -0.37 | 0.68 |      | Putative uncharacterized protein OJ1027 G06.36     |
| Pc_TC100578 | -1.66 | 0.04 | Down | -4.26 | 0         | Down |  | 0.28  | 0.81 |      |  | 0.11  | 0.91 |      | TCP-1/cpn60 chaperonin family protein              |
| Pc_TC100588 | -0.29 | 0.82 |      | -4.4  | 0.01      | Down |  | 1.33  | 0.29 |      |  | 1.27  | 0.17 |      | Expressed protein                                  |
| Pc_TC100596 | 0.08  | 1    |      | 2.43  | 0.05      | Up   |  | 1.01  | 0.6  |      |  | 1.56  | 0.25 |      | Expressed protein                                  |
| Pc_TC100598 | 1.19  | 0.17 |      | 1.27  | 0.2       |      |  | 2.71  | 0.02 | Up   |  | 1.95  | 0.03 | Up   | Expressed protein                                  |
| Pc_TC100602 | 0.5   | 0.36 |      | 1.15  | 0.06      |      |  | -2.34 | 0.04 | Down |  | -1.52 | 0.04 | Down | Expressed protein                                  |
| Pc_TC100605 | -1.41 | 0.18 |      | -1.16 | 0.31      |      |  | 2.38  | 0.04 | Up   |  | 0.77  | 0.4  |      | alpha/beta-Hydrolases superfamily protein          |
| Pc_TC100608 | 1.61  | 0    | Up   | 1.18  | 0.09      |      |  | -4.3  | 0    | Down |  | 0.76  | 0.3  |      | Expressed protein                                  |
| Pc_TC100615 | -1.83 | 0.09 |      | -0.85 | 0.44      |      |  | -3.4  | 0.03 | Down |  | -1.96 | 0.08 |      | Ribosomal protein L10 family protein               |
| Pc_TC100618 | 3.19  | 0.01 | Up   | 0     | 0.48      |      |  | 1.73  | 0.42 |      |  | 1.63  | 0.38 |      | Pre-mRNA-processing-splicing factor                |
| Pc_TC100625 | -1.77 | 0.18 |      | 0.06  | 1         |      |  | -3.67 | 0.06 |      |  | -2.96 | 0.05 | Down | Expressed protein                                  |
| Pc_TC100630 | 1.46  | 0.03 | Up   | 0     | 8.53E-005 |      |  | 1.45  | 0.2  |      |  | 0.38  | 0.67 |      | ATP synthase alpha/beta family protein             |
| Pc_TC100637 | -2.46 | 0.03 | Down | -3.8  | 0.01      | Down |  | -1.55 | 0.28 |      |  | -0.15 | 0.92 |      | Putative uncharacterized protein                   |
| Pc_TC100639 | 0.52  | 0.55 |      | -0.58 | 0.61      |      |  | -3.3  | 0.04 | Down |  | -1.86 | 0.1  |      | Uncharacterized protein                            |
| Pc_TC100642 | -0.34 | 0.8  |      | 0.06  | 1         |      |  | 1.45  | 0.25 |      |  | 1.87  | 0.04 | Up   | Expressed protein                                  |
| Pc_TC100658 | 0.4   | 0.36 |      | 0.14  | 0.8       |      |  | -1.67 | 0.09 |      |  | -1.38 | 0.03 | Down | Expressed protein                                  |
| Pc_TC100659 | -1.53 | 0.03 | Down | 0.77  | 0.27      |      |  | -2.2  | 0.06 |      |  | -3.27 | 0    | Down | Expressed protein                                  |
| Pc_TC100669 | -1.38 | 0.23 |      | -1.23 | 0.33      |      |  | -2.37 | 0.14 |      |  | -3.25 | 0.02 | Down | E3 ubiquitin-protein ligase UPL4                   |
| Pc_TC100684 | -0.54 | 0.53 |      | -0.26 | 0.8       |      |  | 2.28  | 0.04 | Up   |  | 1.04  | 0.2  |      | Expressed protein                                  |
| Pc_TC100685 | -0.47 | 0.52 |      | -1.82 | 0.05      | Down |  | 0.19  | 0.87 |      |  | 0.72  | 0.35 |      | Uncharacterized protein                            |
| Pc_TC100694 | 0.52  | 0.3  |      | 1.58  | 0.01      | Up   |  | -1.18 | 0.26 |      |  | -0.43 | 0.52 |      | cysteine-rich RLK (RECEPTOR-like protein kinase) 8 |
| Pc_TC100709 | 0.91  | 0.47 |      | 1.47  | 0.23      |      |  | 3.11  | 0.02 | Up   |  | 1.7   | 0.13 |      | Expressed protein                                  |
| Pc_TC100717 | 0.57  | 0.18 |      | 0.82  | 0.12      |      |  | -2.56 | 0.01 | Down |  | -0.84 | 0.17 |      | Uncharacterized protein                            |
| Pc_TC100734 | 0.99  | 0.16 |      | 0.51  | 0.56      |      |  | 0.44  | 0.72 |      |  | 2.27  | 0    | Up   | Expressed protein                                  |
| Pc_TC100735 | 0.15  | 0.88 |      | 0.94  | 0.27      |      |  | -2.12 | 0.13 |      |  | -2.41 | 0.03 | Down | Expressed protein                                  |
| Pc_TC100738 | -1.3  | 0.02 | Down | -1.87 | 0.01      | Down |  | 2.21  | 0.02 | Up   |  | 0.74  | 0.25 |      | Expressed protein                                  |
| Pc_TC100748 | 1.7   | 0    | Up   | 0     | 1.57E-008 |      |  | 1.52  | 0.14 |      |  | 0.03  | 0.97 |      | Ribosomal S17 family protein                       |
| Pc_TC100750 | 0.61  | 0.45 |      | 0.06  | 0.99      |      |  | -3.26 | 0.03 | Down |  | -1.37 | 0.19 |      | Expressed protein                                  |
| Pc_TC100751 | 0.29  | 0.61 |      | 0.98  | 0.12      |      |  | -2.34 | 0.04 | Down |  | -1.36 | 0.07 |      | Leucine-rich repeat transmembrane protein kinase   |
| Pc_TC100754 | -0.11 | 0.9  |      | 0.43  | 0.58      |      |  | -2.18 | 0.08 |      |  | -2.06 | 0.02 | Down | Expressed protein                                  |
| Pc_TC100763 | -0.26 | 0.86 |      | 0.2   | 0.9       |      |  | -4.74 | 0.03 | Down |  | 0.42  | 0.72 |      | Expressed protein                                  |
| Pc_TC100780 | -0.49 | 0.47 |      | -2.6  | 0         | Down |  | 1.09  | 0.3  |      |  | -1.55 | 0.06 |      | glutathione peroxidase 6                           |
| Pc_TC100782 | 1.01  | 0.13 |      | 0.67  | 0.41      |      |  | -2.64 | 0.05 | Down |  | -0.58 | 0.52 |      | Expressed protein                                  |
| Pc_TC100783 | 0.15  | 0.71 |      | -1    | 0.06      |      |  | 1.8   | 0.04 | Up   |  | 1.83  | 0    | Up   | Expressed protein                                  |
| Pc_TC100794 | 0.34  | 0.55 |      | 0.67  | 0.3       |      |  | -3.05 | 0.01 | Down |  | -0.68 | 0.35 |      | Expressed protein                                  |
| Pc_TC100810 | 0.95  | 0.38 |      | 2.23  | 0.03      | Up   |  | 1.13  | 0.44 |      |  | 0.63  | 0.63 |      | Expressed protein                                  |
| Pc_TC100813 | -0.2  | 0.83 |      | 1.45  | 0.06      |      |  | -5.02 | 0    | Down |  | -3.31 | 0    | Down | Expressed protein                                  |

|             |       |       |      |  |       |           |      |       |           |      |       |       |      |                                                   |  |
|-------------|-------|-------|------|--|-------|-----------|------|-------|-----------|------|-------|-------|------|---------------------------------------------------|--|
| Pc_TC100815 | 0.74  | 0.27  |      |  | 1.17  | 0.12      |      | 0.27  | 0.82      |      | 1.81  | 0.01  | Up   | Expressed protein                                 |  |
| Pc_TC100817 | 1.12  | 0.09  |      |  | -2.15 | 0.04      | Down | 0.47  | 0.69      |      | 1.05  | 0.18  |      | Leucine-rich repeat protein kinase family protein |  |
| Pc_TC100838 | 2.7   | 0.01  | Up   |  | 0     | 0.2       |      | 2.85  | 0.05      |      | 0.74  | 0.67  |      | endoplasmic reticulum retention defective 2B      |  |
| Pc_TC100855 | 1.25  | 0.02  | Up   |  | 1.14  | 0.08      |      | -4.99 | 0         | Down | 0.36  | 0.61  |      | Uncharacterized protein                           |  |
| Pc_TC100863 | 0.35  | 0.57  |      |  | -0.33 | 0.67      |      | -0.27 | 0.81      |      | -1.64 | 0.04  | Down | Leucine-rich repeat protein kinase family protein |  |
| Pc_TC100869 | 0.7   | 0.54  |      |  | -0.06 | 1         |      | 2.52  | 0.05      | Up   | 1.17  | 0.28  |      | Expressed protein                                 |  |
| Pc_TC100876 | 1.59  | 0.08  |      |  | -0.29 | 0.89      |      | 3.48  | 0         | Up   | -0.01 | 1     |      | Expressed protein                                 |  |
| Pc_TC100918 | -1.18 | 0.04  | Down |  | -1.2  | 0.08      |      | 1.18  | 0.23      |      | 0.55  | 0.39  |      | DNA-binding protein-like                          |  |
| Pc_TC100926 | 0.45  | 0.52  |      |  | 0.06  | 0.97      |      | -2.77 | 0.04      | Down | -0.35 | 0.69  |      | Uncharacterized protein                           |  |
| Pc_TC100932 | 0.62  | 0.42  |      |  | 1.6   | 0.05      | Up   | -1.38 | 0.3       |      | -1.78 | 0.09  |      | Expressed protein                                 |  |
| Pc_TC100935 | 0.01  | 1     |      |  | 0.31  | 0.56      |      | -1.02 | 0.29      |      | -1.44 | 0.02  | Down | alpha/beta-Hydrolases superfamily protein         |  |
| Pc_TC100950 | -2.45 | 0.01  | Down |  | -0.66 | 0.49      |      | 0     | 1         |      | -0.99 | 0.29  |      | Expressed protein                                 |  |
| Pc_TC100959 | -0.44 | 0.61  |      |  | 0.97  | 0.24      |      | -1.84 | 0.17      |      | -1.99 | 0.05  | Down | Expressed protein                                 |  |
| Pc_TC100961 | 2.3   | ##### | Up   |  | 0     | 2.85E-006 |      | 2.96  | 0.01      | Up   | 0.76  | 0.31  |      | Expressed protein                                 |  |
| Pc_TC100965 | 0     | ##### |      |  | 0     | 1.52E-005 |      | -4.3  | 0         | Down | 0     | ##### |      | Expressed protein                                 |  |
| Pc_TC100983 | 1.78  | 0.01  | Up   |  | 0.62  | 0.49      |      | 0.56  | 0.65      |      | -0.54 | 0.58  |      | laccase 7                                         |  |
| Pc_TC100997 | 0.08  | 0.78  |      |  | 0.74  | 0.04      |      | -2.42 | 0         | Down | -1.18 | 0.02  | Down | Expressed protein                                 |  |
| Pc_TC100998 | 0.55  | 0.06  |      |  | 1     | 0.01      |      | -4.01 | 1.43E-005 | Down | -1.71 | 0     | Down | Expressed protein                                 |  |
| Pc_TC101012 | 0.24  | 0.82  |      |  | -1.42 | 0.25      |      | -4.14 | 0.02      | Down | -3.43 | 0.01  | Down | Expressed protein                                 |  |
| Pc_TC101032 | 0.72  | 0.39  |      |  | 1.68  | 0.05      | Up   | -0.67 | 0.64      |      | 0.49  | 0.62  |      | Expressed protein                                 |  |
| Pc_TC101034 | 0.08  | 0.99  |      |  | 0.06  | 1         |      | 0     | 0.01      |      | -3.18 | 0.03  | Down | Expressed protein                                 |  |
| Pc_TC101035 | -1.73 | 0.16  |      |  | -1.01 | 0.43      |      | -2.89 | 0.09      |      | -3.77 | 0.01  | Down | Lipase                                            |  |
| Pc_TC101040 | 1.2   | 0.26  |      |  | 1.85  | 0.09      |      | 1.37  | 0.34      |      | 2.02  | 0.05  | Up   | Os12g0122400 protein                              |  |
| Pc_TC101041 | -1.23 | 0.11  |      |  | -3.69 | 0         | Down | 0.95  | 0.39      |      | 0.02  | 1     |      | Os12g0122400 protein                              |  |
| Pc_TC101076 | -1.44 | 0.02  | Down |  | -1.87 | 0.01      | Down | -1.34 | 0.21      |      | -1.32 | 0.07  |      | Expressed protein                                 |  |
| Pc_TC101084 | 1.04  | 0.05  |      |  | 1.25  | 0.05      | Up   | -1.02 | 0.35      |      | 0.39  | 0.58  |      | Expressed protein                                 |  |
| Pc_TC101087 | 0.49  | 0.27  |      |  | 0.18  | 0.75      |      | -3.9  | 0         | Down | -1.54 | 0.02  | Down | Expressed protein                                 |  |
| Pc_TC101117 | -1.23 | 0.15  |      |  | -2.17 | 0.04      | Down | 1.56  | 0.16      |      | 0.34  | 0.7   |      | Expressed protein                                 |  |
| Pc_TC101120 | 0.37  | 0.48  |      |  | 0.35  | 0.58      |      | -2.97 | 0.01      | Down | -1.6  | 0.03  | Down | Putative luciferin-regenerating enzyme            |  |
| Pc_TC101121 | 1.4   | 0.01  | Up   |  | 0     | 1.35E-009 |      | 2.13  | 0.03      | Up   | 0.57  | 0.41  |      | Expressed protein                                 |  |
| Pc_TC101124 | -2.54 | 0     | Down |  | 0.04  | 0.97      |      | -1.65 | 0.15      |      | -3.08 | 0     | Down | Expressed protein                                 |  |
| Pc_TC101126 | -2.69 | 0.02  | Down |  | -2.44 | 0.04      | Down | -5.58 | 0         | Down | -3.46 | 0.01  | Down | Expressed protein                                 |  |
| Pc_TC101128 | 0.32  | 0.42  |      |  | 0.55  | 0.26      |      | -3.74 | 0         | Down | -2.55 | ##### | Down | Expressed protein                                 |  |
| Pc_TC101145 | 0.38  | 0.62  |      |  | 0.28  | 0.76      |      | -1.76 | 0.17      |      | -2.15 | 0.03  | Down | Expressed protein                                 |  |
| Pc_TC101156 | 0     | 1     |      |  | 0.02  | 0.99      |      | -2.35 | 0.05      | Down | -0.35 | 0.64  |      | Expressed protein                                 |  |
| Pc_TC101167 | -0.04 | 0.97  |      |  | 1.15  | 0.09      |      | -2.74 | 0.02      | Down | -2.43 | 0     | Down | Expressed protein                                 |  |
| Pc_TC101168 | -1.31 | 0.17  |      |  | 1.99  | 0.01      | Up   | -2    | 0.16      |      | -1.14 | 0.26  |      | Expressed protein                                 |  |
| Pc_TC101182 | -3.09 | 0.02  | Down |  | -0.79 | 0.49      |      | -0.16 | 0.93      |      | 0.12  | 0.94  |      | Expressed protein                                 |  |
| Pc_TC101184 | -1.57 | 0.18  |      |  | -4.4  | 0.01      | Down | -0.15 | 0.94      |      | -0.66 | 0.57  |      | Uncharacterized protein                           |  |
| Pc_TC101193 | 0.49  | 0.31  |      |  | 0.52  | 0.37      |      | 0     | 1.38E-008 |      | -3.21 | ##### | Down | Expressed protein                                 |  |
| Pc_TC101194 | 0.61  | 0.35  |      |  | 1.03  | 0.16      |      | -3.17 | 0.02      | Down | -0.7  | 0.4   |      | Expressed protein                                 |  |
| Pc_TC101208 | -2.35 | 0.02  | Down |  | -1.78 | 0.09      |      | -1.92 | 0.15      |      | -1.41 | 0.15  |      | Uncharacterized protein                           |  |
| Pc_TC101216 | 0.23  | 0.75  |      |  | 0.73  | 0.34      |      | -2.87 | 0.03      | Down | -0.84 | 0.33  |      | Expressed protein                                 |  |
| Pc_TC101224 | 2.18  | 0     | Up   |  | -3.53 | 0.02      | Down | 2.15  | 0.07      |      | 0.4   | 0.71  |      | electron transfer flavoprotein alpha              |  |
| Pc_TC101249 | 0.25  | 0.82  |      |  | -0.13 | 0.94      |      | 2.55  | 0.03      | Up   | 1.31  | 0.15  |      | Expressed protein                                 |  |
| Pc_TC101274 | 0.88  | 0.18  |      |  | 0.61  | 0.44      |      | -2.43 | 0.06      |      | -1.81 | 0.04  | Down | Expressed protein                                 |  |
| Pc_TC101296 | 0.82  | 0.25  |      |  | 0.7   | 0.4       |      | -2.76 | 0.05      | Down | -2.15 | 0.03  | Down | Expressed protein                                 |  |
| Pc_TC101319 | -0.6  | 0.37  |      |  | -0.74 | 0.34      |      | -0.41 | 0.71      |      | -1.82 | 0.03  | Down | Uncharacterized protein                           |  |
| Pc_TC101330 | 1.29  | 0.04  | Up   |  | 0     | 6.86E-006 |      | 1.94  | 0.07      |      | 0.03  | 0.99  |      | Endoribonuclease                                  |  |
| Pc_TC101331 | 0     | 0.01  |      |  | -1.53 | 0.32      |      | -4.4  | 0.05      | Down | -3.28 | 0.05  |      | Expressed protein                                 |  |
| Pc_TC101340 | 0.53  | 0.33  |      |  | 1.42  | 0.02      | Up   | -1.05 | 0.33      |      | -0.24 | 0.74  |      | Expressed protein                                 |  |
| Pc_TC101342 | 0.28  | 0.65  |      |  | 1.15  | 0.09      |      | -3.97 | 0         | Down | -2.78 | 0     | Down | Expressed protein                                 |  |
| Pc_TC101352 | -2.79 | 0     | Down |  | -1.76 | 0.04      | Down | 1.94  | 0.06      |      | 0.37  | 0.62  |      | Expressed protein                                 |  |
| Pc_TC101354 | 2.56  | 0     | Up   |  | 0     | 0         |      | 1.6   | 0.19      |      | 0.66  | 0.51  |      | multifunctional protein 2                         |  |
| Pc_TC101370 | 0.27  | 0.66  |      |  | -0.17 | 0.83      |      | 1.93  | 0.06      |      | 1.51  | 0.03  | Up   | Expressed protein                                 |  |
| Pc_TC101371 | -3.44 | ##### | Down |  | -2.72 | 0         | Down | 0.65  | 0.54      |      | -0.35 | 0.65  |      | Expressed protein                                 |  |
| Pc_TC101374 | 0.63  | 0.56  |      |  | 2.03  | 0.03      | Up   | -0.16 | 0.96      |      | 0.04  | 1     |      | Expressed protein                                 |  |
| Pc_TC101381 | 1.35  | 0.09  |      |  | 1.66  | 0.06      |      | -2.08 | 0.18      |      | -2.96 | 0.03  | Down | Expressed protein                                 |  |
| Pc_TC101397 | 0.31  | 0.41  |      |  | 0.5   | 0.29      |      | -2.84 | 0         | Down | -0.47 | 0.4   |      | Expressed protein                                 |  |
| Pc_TC101398 | 1.45  | 0     | Up   |  | 1.23  | 0.03      | Up   | -1.55 | 0.14      |      | -0.31 | 0.64  |      | Membrane protein-like                             |  |
| Pc_TC101405 | 0.26  | 0.79  |      |  | 0.64  | 0.5       |      | -4.4  | 0.01      | Down | -0.7  | 0.51  |      | Expressed protein                                 |  |
| Pc_TC101409 | 0.08  | 0.99  |      |  | 1.12  | 0.24      |      | -1.15 | 0.44      |      | -2.83 | 0.04  | Down | Expressed protein                                 |  |



|             |       |       |      |       |           |      |       |           |      |       |       |      |                                                             |
|-------------|-------|-------|------|-------|-----------|------|-------|-----------|------|-------|-------|------|-------------------------------------------------------------|
| Pc_TC101416 | 0.49  | 0.49  |      | 0.16  | 0.87      |      | -2.69 | 0.04      | Down | -0.03 | 1     |      | Uncharacterized protein                                     |
| Pc_TC101424 | -0.41 | 0.66  |      | -0.68 | 0.52      |      | -3.63 | 0.02      | Down | -2.04 | 0.06  |      | Expressed protein                                           |
| Pc_TC101428 | 0.5   | 0.26  |      | 0.56  | 0.31      |      | -4.62 | 7.92E-005 | Down | -1.68 | 0.01  | Down | Expressed protein                                           |
| Pc_TC101445 | -0.11 | 0.96  |      | -2.2  | 0.1       |      | 0.09  | 0.98      |      | -3.37 | 0.02  | Down | Expressed protein                                           |
| Pc_TC101446 | 0.4   | 0.32  |      | 0.36  | 0.47      |      | -5.22 | 5.57E-006 | Down | -3.33 | ##### | Down | Expressed protein                                           |
| Pc_TC101464 | 0.56  | 0.14  |      | 1.24  | 0.01      | Up   | -0.8  | 0.39      |      | 1.39  | 0.01  | Up   | Leucine-rich repeat protein kinase family protein           |
| Pc_TC101466 | 0     | 0     |      | 0     | 0         |      | 0.1   | 0.96      |      | -2.91 | 0.02  | Down | Putative uncharacterized protein                            |
| Pc_TC101496 | -0.51 | 0.89  |      | 0.93  | 0.59      |      | 1.56  | 0.35      |      | 2.4   | 0.04  | Up   | Expressed protein                                           |
| Pc_TC101497 | -0.05 | 0.95  |      | -0.04 | 0.97      |      | 2.1   | 0.04      | Up   | -0.1  | 0.9   |      | Uncharacterized protein                                     |
| Pc_TC101513 | 0.15  | 0.81  |      | 0.4   | 0.56      |      | -4.57 | 0         | Down | -2.81 | 0     | Down | Expressed protein                                           |
| Pc_TC101514 | -0.38 | 0.56  |      | 1.62  | 0.01      | Up   | 0.39  | 0.72      |      | -0.06 | 0.95  |      | Coatomer,beta' subunit                                      |
| Pc_TC101521 | 1.66  | 0.23  |      | -0.26 | 1         |      | 3.09  | 0.04      | Up   | 1.89  | 0.17  |      | Expressed protein                                           |
| Pc_TC101528 | 0.39  | 0.62  |      | 1.49  | 0.06      |      | -4.89 | 0         | Down | -2.77 | 0.01  | Down | Expressed protein                                           |
| Pc_TC101531 | 2.14  | ##### | Up   | 0     | 2.13E-007 |      | 1.78  | 0.09      |      | 0.52  | 0.48  |      | Ribosomal protein L31e family protein                       |
| Pc_TC101533 | 1.59  | 0     | Up   | 0     | 2.48E-010 |      | 1.09  | 0.28      |      | -0.7  | 0.33  |      | Ribosomal protein S5 family protein                         |
| Pc_TC101534 | -4.47 | ##### | Down | 0     | 2.52E-006 |      | -1.87 | 0.13      |      | -6.5  | ##### | Down | cyclophilin 20-2                                            |
| Pc_TC101539 | 0.74  | 0.23  |      | -0.09 | 0.93      |      | -0.27 | 0.81      |      | 2.23  | 0     | Up   | Expressed protein                                           |
| Pc_TC101556 | 0.7   | 0.36  |      | 1.34  | 0.11      |      | -4.04 | 0.01      | Down | -1.11 | 0.27  |      | Expressed protein                                           |
| Pc_TC101581 | 0.65  | 0.25  |      | 0.87  | 0.19      |      | -2.84 | 0.02      | Down | -1.9  | 0.02  | Down | Expressed protein                                           |
| Pc_TC101592 | 0     | ##### |      | -4.38 | 5.86E-005 | Down | -4.94 | 0         | Down | 0     | ##### |      | Expressed protein                                           |
| Pc_TC101596 | 1.85  | ##### | Up   | 0     | 7.75E-011 |      | 1.55  | 0.12      |      | -0.12 | 0.87  |      | Ribosomal protein L6 family                                 |
| Pc_TC101616 | 0.66  | 0.72  |      | 1.47  | 0.31      |      | 3.26  | 0.02      | Up   | 2.74  | 0.02  | Up   | Uncharacterized protein                                     |
| Pc_TC101623 | 0.95  | 0.2   |      | 1.06  | 0.21      |      | -5.67 | 0         | Down | -3.54 | 0     | Down | Expressed protein                                           |
| Pc_TC101628 | 0.73  | 0.18  |      | 0.33  | 0.63      |      | -2.65 | 0.02      | Down | -1.03 | 0.16  |      | alpha-N-acetylglucosaminidase family / NAGLU family         |
| Pc_TC101653 | -0.02 | 0.99  |      | 1.84  | 0         | Up   | -1.53 | 0.17      |      | -0.46 | 0.54  |      | Expressed protein                                           |
| Pc_TC101669 | -0.21 | 0.65  |      | -0.48 | 0.41      |      | -2.04 | 0.05      | Down | -1.15 | 0.07  |      | Expressed protein                                           |
| Pc_TC101679 | -0.92 | 0.83  |      | 1.87  | 0.24      |      | 3.15  | 0.04      | Up   | 2.33  | 0.09  |      | Expressed protein                                           |
| Pc_TC101700 | 0.37  | 0.75  |      | 0.8   | 0.46      |      | -4.67 | 0.03      | Down | -0.54 | 0.67  |      | Expressed protein                                           |
| Pc_TC101711 | -2.06 | 0.03  | Down | -1.23 | 0.22      |      | -2.37 | 0.08      |      | -1.83 | 0.07  |      | Expressed protein                                           |
| Pc_TC101714 | 0.6   | 0.12  |      | 1.02  | 0.03      | Up   | -3.59 | 0         | Down | -1.55 | 0.01  | Down | Expressed protein                                           |
| Pc_TC101746 | -0.25 | 0.68  |      | -0.96 | 0.19      |      | -2.45 | 0.03      | Down | -2    | 0.01  | Down | Expressed protein                                           |
| Pc_TC101757 | 0.08  | 1     |      | 0     | 0.48      |      | 3.28  | 0.05      | Up   | -1.96 | 0.63  |      | Expressed protein                                           |
| Pc_TC101767 | 0.49  | 0.4   |      | 0.7   | 0.3       |      | -1.85 | 0.1       |      | -2.37 | 0     | Down | Expressed protein                                           |
| Pc_TC101772 | -0.59 | 0.37  |      | -0.18 | 0.82      |      | -3.71 | 0         | Down | -4.17 | ##### | Down | Expressed protein                                           |
| Pc_TC101775 | -0.04 | 0.92  |      | -0.08 | 0.88      |      | -2.27 | 0.02      | Down | -1.67 | 0.01  | Down | Expressed protein                                           |
| Pc_TC101776 | -0.78 | 0.38  |      | -0.55 | 0.59      |      | -4.16 | 0.01      | Down | -1.72 | 0.1   |      | Expressed protein                                           |
| Pc_TC101800 | -0.52 | 0.46  |      | 0.34  | 0.66      |      | -2.65 | 0.04      | Down | -1.41 | 0.09  |      | Expressed protein                                           |
| Pc_TC101806 | 0.42  | 0.43  |      | 0.57  | 0.37      |      | -2.39 | 0.03      | Down | -1.66 | 0.02  | Down | Expressed protein                                           |
| Pc_TC101811 | 1.83  | 0.01  | Up   | 0     | 0         |      | 2.07  | 0.07      |      | 0.36  | 0.7   |      | Expressed protein                                           |
| Pc_TC101826 | 0     | 0     |      | 0     | 0         |      | -4.14 | 0.02      | Down | 0     | 0     |      | Expressed protein                                           |
| Pc_TC101829 | 0.3   | 0.95  |      | 2.47  | 0.04      | Up   | -0.08 | 1         |      | 0.5   | 0.82  |      | Putative polyprotein                                        |
| Pc_TC101841 | 0.88  | 0.19  |      | 0.95  | 0.22      |      | -3.47 | 0.01      | Down | -1.4  | 0.13  |      | Expressed protein                                           |
| Pc_TC101868 | 0.05  | 0.96  |      | 0.98  | 0.16      |      | -1.8  | 0.12      |      | -2.48 | 0     | Down | Putative uncharacterized protein                            |
| Pc_TC101875 | 2.08  | 0.13  |      | 2.64  | 0.05      |      | 1.67  | 0.38      |      | 2.63  | 0.05  | Up   | Expressed protein                                           |
| Pc_TC101901 | -0.01 | 1     |      | -1.02 | 0.2       |      | 2.07  | 0.05      | Up   | 1.36  | 0.05  |      | Expressed protein                                           |
| Pc_TC101902 | -0.14 | 0.98  |      | -1.43 | 0.37      |      | -1.98 | 0.27      |      | -4.18 | 0.03  | Down | Expressed protein                                           |
| Pc_TC101907 | 1.8   | 0.02  | Up   | 1.06  | 0.29      |      | -1.82 | 0.25      |      | 0.47  | 0.67  |      | Expressed protein                                           |
| Pc_TC101921 | -0.19 | 0.77  |      | 0.77  | 0.26      |      | -3.22 | 0.01      | Down | -0.82 | 0.28  |      | Expressed protein                                           |
| Pc_TC101925 | -0.23 | 0.72  |      | 0.86  | 0.2       |      | -2.42 | 0.04      | Down | -0.88 | 0.24  |      | Expressed protein                                           |
| Pc_TC101955 | 0.74  | 0.18  |      | 0.77  | 0.24      |      | -3.07 | 0.01      | Down | -0.74 | 0.31  |      | Expressed protein                                           |
| Pc_TC101972 | 0.66  | 0.53  |      | 1.96  | 0.04      | Up   | 0.71  | 0.62      |      | -0.29 | 0.86  |      | Expressed protein                                           |
| Pc_TC101986 | 0.18  | 0.83  |      | 1.19  | 0.11      |      | -4.01 | 0.01      | Down | -1.62 | 0.08  |      | Expressed protein                                           |
| Pc_TC101990 | -0.85 | 0.46  |      | 0.8   | 0.44      |      | -3.3  | 0.06      |      | -3.77 | 0.01  | Down | Brefeldin A-inhibited guanine nucleotide-exchange protein 2 |
| Pc_TC102002 | -0.17 | 0.82  |      | 0.22  | 0.79      |      | -2.04 | 0.09      |      | -2.04 | 0.02  | Down | Expressed protein                                           |
| Pc_TC102012 | -1.57 | 0.16  |      | 1.74  | 0.05      | Up   | -0.97 | 0.5       |      | -0.85 | 0.45  |      | ADP/ATP carrier 3                                           |
| Pc_TC102015 | 1.1   | 0.08  |      | -0.08 | 0.94      |      | 1.06  | 0.33      |      | 1.75  | 0.02  | Up   | Expressed protein                                           |
| Pc_TC102022 | 0.9   | 0.16  |      | 1.27  | 0.08      |      | -4.2  | 0         | Down | -1.4  | 0.11  |      | Uncharacterized protein                                     |
| Pc_TC102031 | 0.04  | 0.96  |      | -0.33 | 0.63      |      | -4.36 | 0         | Down | -2.37 | 0     | Down | Putative uncharacterized protein OSJNBb0081K01.13           |
| Pc_TC102055 | 0.44  | 0.73  |      | -0.05 | 1         |      | -2.3  | 0.21      |      | -4.18 | 0.03  | Down | Putative uncharacterized protein                            |
| Pc_TC102063 | -2.61 | ##### | Down | -0.49 | 0.38      |      | -1.25 | 0.19      |      | -0.07 | 0.91  |      | Helicase/SANT-associated,DNA binding protein                |
| Pc_TC102065 | -0.54 | 0.22  |      | 0.43  | 0.41      |      | -2.32 | 0.02      | Down | -2.93 | ##### | Down | Helicase/SANT-associated,DNA binding protein                |
| Pc_TC102066 | 1.27  | 0     | Up   | 1.07  | 0.05      | Up   | -0.15 | 0.88      |      | 0.41  | 0.5   |      | Helicase/SANT-associated,DNA binding protein                |

|             |       |       |      |           |      |      |       |      |      |       |      |      |                                                                         |  |
|-------------|-------|-------|------|-----------|------|------|-------|------|------|-------|------|------|-------------------------------------------------------------------------|--|
| Pc_TC102072 | -0.92 | 0.27  |      | -2.2      | 0.04 | Down | 1.96  | 0.08 |      | 0.5   | 0.55 |      | Disease resistance protein (CC-NBS-LRR class) family                    |  |
| Pc_TC102075 | 1.02  | 0.13  |      | 0.91      | 0.25 |      | 0     | 0    |      | -4.05 | 0    | Down | Expressed protein                                                       |  |
| Pc_TC102090 | 1.09  | 0.09  |      | 1.73      | 0.01 | Up   | -5.47 | 0    | Down | -1.26 | 0.15 |      | prenylcysteine methylesterase                                           |  |
| Pc_TC102091 | 1.02  | 0.03  | Up   | 1.51      | 0.01 | Up   | -3.46 | 0    | Down | -1.61 | 0.02 | Down | prenylcysteine methylesterase                                           |  |
| Pc_TC102092 | 0.53  | 0.29  |      | 1.32      | 0.02 | Up   | -4.58 | 0    | Down | -2.23 | 0    | Down | prenylcysteine methylesterase                                           |  |
| Pc_TC102093 | 0.11  | 0.92  |      | 1.06      | 0.2  |      | -1.36 | 0.3  |      | -2.37 | 0.03 | Down | Expressed protein                                                       |  |
| Pc_TC102100 | -1.92 | 0.07  |      | -2.94     | 0.02 | Down | 2.54  | 0.03 | Up   | 0.69  | 0.44 |      | Expressed protein                                                       |  |
| Pc_TC102113 | 2.82  | 0.04  | Up   | 0         | 0.48 |      | 2.73  | 0.12 |      | 1.85  | 0.29 |      | Expressed protein                                                       |  |
| Pc_TC102123 | 0.44  | 0.42  |      | -0.25     | 0.72 |      | -1.96 | 0.08 |      | -1.99 | 0.01 | Down | Putative uncharacterized protein                                        |  |
| Pc_TC102136 | -0.01 | 1     |      | 2.11      | 0    | Up   | -0.88 | 0.47 |      | -1.29 | 0.16 |      | GTP binding Elongation factor Tu family protein                         |  |
| Pc_TC102160 | 0.98  | 0.1   |      | -3.13     | 0    | Down | 1.4   | 0.19 |      | 0.29  | 0.71 |      | CPL3                                                                    |  |
| Pc_TC102167 | 1.03  | 0.29  |      | 0.8       | 0.49 |      | 2.34  | 0.06 |      | 1.97  | 0.04 | Up   | Expressed protein                                                       |  |
| Pc_TC102176 | 0.17  | 0.88  |      | -0.2      | 0.87 |      | 2.9   | 0.01 | Up   | 1.98  | 0.02 | Up   | Expressed protein                                                       |  |
| Pc_TC102177 | 0.02  | 0.99  |      | 1.03      | 0.13 |      | -2.71 | 0.03 | Down | -1.46 | 0.07 |      | OSJNBb0015D13.14 protein                                                |  |
| Pc_TC102197 | 0.49  | 0.38  |      | 0.12      | 0.86 |      | -3.97 | 0    | Down | -2.48 | 0    | Down | Expressed protein                                                       |  |
| Pc_TC102205 | -2.24 | 0.09  |      | -3.26     | 0.05 | Down | -0.01 | 1    |      | -0.53 | 0.67 |      | Expressed protein                                                       |  |
| Pc_TC102222 | -1.4  | 0.13  |      | -2.91     | 0.02 | Down | 0.59  | 0.63 |      | 0.51  | 0.57 |      | Pectinacetyltransferase family protein                                  |  |
| Pc_TC102233 | 0.86  | 0.27  |      | 1.29      | 0.13 |      | -5.5  | 0    | Down | -1.79 | 0.1  |      | Expressed protein                                                       |  |
| Pc_TC102239 | -5.28 | ##### | Down | -2.6      | 0.01 | Down | -4.05 | 0    | Down | -3.73 | 0    | Down | Expressed protein                                                       |  |
| Pc_TC102245 | 0.05  | 0.92  |      | 0.07      | 0.91 |      | -1.65 | 0.11 |      | -1.54 | 0.02 | Down | Expressed protein                                                       |  |
| Pc_TC102260 | 0.14  | 0.88  |      | 0.91      | 0.26 |      | -3.7  | 0.01 | Down | -1.58 | 0.1  |      | Expressed protein                                                       |  |
| Pc_TC102270 | -0.06 | 0.93  |      | 0.15      | 0.82 |      | -2.66 | 0.02 | Down | -0.75 | 0.29 |      | Protein phosphatase 2C family protein                                   |  |
| Pc_TC102278 | -0.21 | 0.78  |      | 0.27      | 0.74 |      | -1.19 | 0.32 |      | -1.94 | 0.03 | Down | Putative uncharacterized protein OJ1695 D07.19                          |  |
| Pc_TC102283 | 0.46  | 0.38  |      | -0.08     | 0.91 |      | 0.32  | 0.75 |      | -1.42 | 0.05 | Down | Expressed protein                                                       |  |
| Pc_TC102284 | 2.4   | 0.03  | Up   | 1.72      | 0.21 |      | -0.5  | 0.89 |      | -0.37 | 0.93 |      | Expressed protein                                                       |  |
| Pc_TC102292 | -3.24 | 0.01  | Down | -1.53     | 0.19 |      | -0.23 | 0.88 |      | -0.89 | 0.4  |      | carbonic anhydrase 2                                                    |  |
| Pc_TC102313 | -0.15 | 0.86  |      | 1.16      | 0.13 |      | -1.73 | 0.17 |      | -2.32 | 0.02 | Down | Uncharacterized protein                                                 |  |
| Pc_TC102334 | -2.06 | 0.01  | Down | -0.13     | 0.89 |      | -2.73 | 0.03 | Down | -0.16 | 0.85 |      | Expressed protein                                                       |  |
| Pc_TC102341 | 0.43  | 0.32  |      | -0.29     | 0.62 |      | 1.06  | 0.25 |      | 1.41  | 0.01 | Up   | Cobalamin-independent synthase family protein                           |  |
| Pc_TC102350 | 1.09  | 0.06  |      | 1.53      | 0.02 | Up   | -0.8  | 0.48 |      | -0.09 | 0.92 |      | Expressed protein                                                       |  |
| Pc_TC102355 | 0.19  | 0.76  |      | 0.85      | 0.19 |      | -2.57 | 0.03 | Down | -1.23 | 0.1  |      | H0215A08.2 protein                                                      |  |
| Pc_TC102359 | -0.39 | 0.57  |      | 0.48      | 0.52 |      | -2.75 | 0.03 | Down | -2.8  | 0    | Down | Putative uncharacterized protein                                        |  |
| Pc_TC102364 | -0.92 | 0.73  |      | 0.8       | 0.67 |      | 2.92  | 0.04 | Up   | 1.9   | 0.14 |      | Expressed protein                                                       |  |
| Pc_TC102365 | -0.81 | 0.58  |      | 0.26      | 0.89 |      | 2.26  | 0.08 |      | 2.55  | 0.01 | Up   | 2-oxoglutarate (2OG) and Fe(II)-dependent oxygenase superfamily protein |  |
| Pc_TC102384 | -0.16 | 0.85  |      | -1.99     | 0.04 | Down | -0.68 | 0.57 |      | -0.65 | 0.46 |      | Expressed protein                                                       |  |
| Pc_TC102387 | 0.83  | 0.19  |      | 1.49      | 0.04 | Up   | -5.63 | 0    | Down | -3.92 | 0    | Down | Expressed protein                                                       |  |
| Pc_TC102388 | -0.86 | 0.1   |      | -1.6      | 0.02 | Down | 1.93  | 0.04 | Up   | 1     | 0.1  |      | Expressed protein                                                       |  |
| Pc_TC102391 | 0.11  | 0.88  |      | 1.12      | 0.11 |      | -1.93 | 0.11 |      | -1.72 | 0.04 | Down | Expressed protein                                                       |  |
| Pc_TC102393 | -0.17 | 0.77  |      | -1.53     | 0.04 | Down | -0.19 | 0.86 |      | 0.04  | 0.96 |      | Expressed protein                                                       |  |
| Pc_TC102435 | 1.34  | 0.02  | Up   | 2.39      | 0    | Up   | -3.21 | 0.01 | Down | -0.23 | 0.78 |      | Expressed protein                                                       |  |
| Pc_TC102453 | 0.28  | 0.52  |      | 0.72      | 0.16 |      | -1.52 | 0.12 |      | -1.25 | 0.05 | Down | Expressed protein                                                       |  |
| Pc_TC102460 | 3.47  | 0.02  | Up   | 0         | 0.67 |      | 1.67  | 0.53 |      | -0.37 | 1    |      | Expressed protein                                                       |  |
| Pc_TC102461 | 0.38  | 0.62  |      | 0.38      | 0.67 |      | -4.5  | 0    | Down | -0.96 | 0.3  |      | Expressed protein                                                       |  |
| Pc_TC102475 | -3.45 | 0.02  | Down | -1.3      | 0.3  |      | -0.38 | 0.81 |      | -1.9  | 0.12 |      | Predicted protein (Fragment)                                            |  |
| Pc_TC102478 | -0.43 | 0.56  |      | -2.1      | 0.03 | Down | 1.23  | 0.26 |      | 0.25  | 0.77 |      | Expressed protein                                                       |  |
| Pc_TC102489 | 1.82  | 0.29  |      | 2.06      | 0.24 |      | -1.08 | 0.83 |      | 2.99  | 0.03 | Up   | RAS associated with diabetes protein 51C                                |  |
| Pc_TC102497 | 0.25  | 0.87  |      | 1.84      | 0.06 |      | -0.25 | 0.9  |      | -3.37 | 0.04 | Down | RmlC-like cupins superfamily protein                                    |  |
| Pc_TC102505 | -0.66 | 0.22  |      | 0.07      | 0.92 |      | -1.91 | 0.07 |      | -1.79 | 0.01 | Down | Expressed protein                                                       |  |
| Pc_TC102507 | 0.28  | 0.67  |      | 0.88      | 0.21 |      | -3.26 | 0.01 | Down | -2.19 | 0.01 | Down | OSJNBa0072K14.17 protein                                                |  |
| Pc_TC102510 | -2.73 | 0.02  | Down | -1.16     | 0.31 |      | 0     | 0    |      | -3.6  | 0.01 | Down | Expressed protein                                                       |  |
| Pc_TC102512 | -1.31 | 0.26  |      | -0.25     | 0.87 |      | -3.89 | 0.04 | Down | 0     | 0    |      | 6-phosphogluconate dehydrogenase family protein                         |  |
| Pc_TC102514 | -0.34 | 0.93  |      | -0.94     | 0.67 |      | 1.96  | 0.18 |      | 2.38  | 0.03 | Up   | Expressed protein                                                       |  |
| Pc_TC102525 | -0.01 | 0.97  |      | -1.09     | 0.02 | Down | 1.13  | 0.19 |      | 0.6   | 0.25 |      | Expressed protein                                                       |  |
| Pc_TC102536 | 0     | ##### |      | 2.64E-005 |      |      | -5.2  | 0    | Down | -4.08 | 0    | Down | cytochrome oxidase 2                                                    |  |
| Pc_TC102541 | -0.07 | 1     |      | 2.32      | 0.03 | Up   | 0     | 0.05 |      | 0     | 0.03 |      | Expressed protein                                                       |  |
| Pc_TC102560 | -0.66 | 0.45  |      | -0.46     | 0.65 |      | -1.23 | 0.35 |      | -2.37 | 0.03 | Down | Expressed protein                                                       |  |
| Pc_TC102561 | 0.67  | 0.24  |      | -0.92     | 0.23 |      | 1.4   | 0.18 |      | 1.67  | 0.01 | Up   | Expressed protein                                                       |  |
| Pc_TC102571 | -0.53 | 0.58  |      | -3.36     | 0.01 | Down | -0.33 | 0.82 |      | -0.02 | 1    |      | Expressed protein                                                       |  |
| Pc_TC102589 | 0.59  | 0.2   |      | 0.89      | 0.11 |      | -2.11 | 0.04 | Down | -0.24 | 0.7  |      | Expressed protein                                                       |  |
| Pc_TC102608 | 1.86  | 0.01  | Up   | 0.77      | 0.43 |      | -1.14 | 0.43 |      | 0.98  | 0.29 |      | Expressed protein                                                       |  |
| Pc_TC102611 | 0.91  | 0.26  |      | 1.41      | 0.11 |      | -5.25 | 0.01 | Down | -2.32 | 0.05 |      | Expressed protein                                                       |  |
| Pc_TC102628 | 0     | 0     |      | -3.53     | 0.02 | Down | 3.32  | 0    | Up   | -3.96 | 0.01 | Down | Expressed protein                                                       |  |

|             |       |       |      |       |           |      |       |      |      |       |       |      |                                                                            |
|-------------|-------|-------|------|-------|-----------|------|-------|------|------|-------|-------|------|----------------------------------------------------------------------------|
| Pc_TC102638 | 0.37  | 0.48  |      | 0.03  | 0.97      |      | -1.85 | 0.09 |      | -1.73 | 0.02  | Down | Expressed protein                                                          |
| Pc_TC102644 | 1.5   | 0.04  | Up   | 0     | 0         |      | 1.16  | 0.34 |      | 0.37  | 0.71  |      | Molybdenum cofactor sulfurase family protein                               |
| Pc_TC102657 | 1.89  | 0.38  |      | 4.27  | 0         | Up   | -0.5  | 1    |      | 1.21  | 0.69  |      | Expressed protein                                                          |
| Pc_TC102659 | 0.24  | 0.74  |      | 0.72  | 0.34      |      | -2.86 | 0.03 | Down | -1.58 | 0.07  |      | Expressed protein                                                          |
| Pc_TC102663 | 0.59  | 0.18  |      | 0.99  | 0.07      |      | -2.34 | 0.03 | Down | -1.36 | 0.04  | Down | Expressed protein                                                          |
| Pc_TC102667 | -0.39 | 0.77  |      | -1.53 | 0.28      |      | -1.86 | 0.26 |      | -3.54 | 0.03  | Down | Expressed protein                                                          |
| Pc_TC102673 | 1.59  | 0.03  | Up   | 1.4   | 0.1       |      | -0.14 | 0.94 |      | 0.43  | 0.65  |      | Expressed protein                                                          |
| Pc_TC102680 | 0     | 1     |      | -0.28 | 0.74      |      | 2.41  | 0.02 | Up   | 1.63  | 0.02  | Up   | Os03g0643433 protein                                                       |
| Pc_TC102694 | -1.18 | 0.44  |      | 0.47  | 0.75      |      | -0.62 | 0.74 |      | 2.19  | 0.03  | Up   | Expressed protein                                                          |
| Pc_TC102698 | 0.2   | 0.73  |      | 0.12  | 0.87      |      | -3.94 | 0    | Down | -1.84 | 0.02  | Down | OSJNBa0024J22.12 protein                                                   |
| Pc_TC102700 | 1.35  | 0.01  | Up   | 0.93  | 0.15      |      | -0.04 | 0.98 |      | 1.59  | 0.02  | Up   | Expressed protein                                                          |
| Pc_TC102705 | -1.38 | 0.02  | Down | -0.98 | 0.15      |      | -0.28 | 0.79 |      | -0.59 | 0.39  |      | RNA-directed DNA polymerase (reverse transcriptase)-related family protein |
| Pc_TC102722 | 2.37  | ##### | Up   | 0     | 5.31E-006 |      | 2.68  | 0.01 | Up   | -0.76 | 0.37  |      | selenium-binding protein 3                                                 |
| Pc_TC102727 | -1.1  | 0.21  |      | 0.09  | 0.95      |      | -1.6  | 0.22 |      | -2.8  | 0.01  | Down | Expressed protein                                                          |
| Pc_TC102734 | -0.18 | 0.77  |      | -1.6  | 0.04      | Down | 1.12  | 0.28 |      | 0.66  | 0.34  |      | Expressed protein                                                          |
| Pc_TC102740 | 1.4   | 0.06  |      | 1.91  | 0.02      | Up   | -0.22 | 0.89 |      | 0.84  | 0.36  |      | Expressed protein                                                          |
| Pc_TC102757 | -1.96 | 0.05  | Down | -1.57 | 0.15      |      | 2.24  | 0.05 | Up   | 0.84  | 0.32  |      | Expressed protein                                                          |
| Pc_TC102764 | 0.66  | 0.21  |      | 0.66  | 0.3       |      | -3.78 | 0    | Down | -2.13 | 0.01  | Down | Expressed protein                                                          |
| Pc_TC102778 | -0.26 | 0.41  |      | -1.11 | 0.01      | Down | 2.05  | 0.02 | Up   | 1.15  | 0.02  | Up   | Expressed protein                                                          |
| Pc_TC102788 | -0.43 | 0.57  |      | -1.85 | 0.05      | Down | -0.33 | 0.79 |      | 0.24  | 0.78  |      | Pentatricopeptide repeat (PPR) superfamily protein                         |
| Pc_TC102793 | -1.39 | 0.14  |      | -2.79 | 0.02      | Down | -0.42 | 0.76 |      | -0.19 | 0.87  |      | Expressed protein                                                          |
| Pc_TC102796 | 4.4   | ##### | Up   | 0     | 0.04      |      | 4.14  | 0    | Up   | 1.29  | 0.24  |      | acyl-CoA-binding protein 6                                                 |
| Pc_TC102797 | -1.92 | 0.17  |      | -0.24 | 0.9       |      | -1.17 | 0.48 |      | -4.37 | 0.02  | Down | Expressed protein                                                          |
| Pc_TC102806 | 0.34  | 0.76  |      | -1.09 | 0.4       |      | -3.82 | 0.04 | Down | -2.37 | 0.08  |      | Expressed protein                                                          |
| Pc_TC102815 | 0.51  | 0.22  |      | 0.85  | 0.09      |      | -3.59 | 0    | Down | -0.09 | 0.88  |      | Putative XA1                                                               |
| Pc_TC102818 | -1.14 | 0.26  |      | -3.16 | 0.02      | Down | -1.84 | 0.21 |      | -2.01 | 0.08  |      | Expressed protein                                                          |
| Pc_TC102824 | -0.54 | 0.39  |      | -1.71 | 0.03      | Down | 0.52  | 0.62 |      | -0.6  | 0.42  |      | Uncharacterized protein                                                    |
| Pc_TC102830 | 3.94  | 0     | Up   | 0     | 0.67      |      | 2.09  | 0.38 |      | 0     | 0.54  |      | Expressed protein                                                          |
| Pc_TC102837 | 2.11  | 0.02  | Up   | 1.64  | 0.13      |      | -1.08 | 0.56 |      | -0.15 | 0.97  |      | Expressed protein                                                          |
| Pc_TC102845 | 1.89  | 0     | Up   | 0     | 3.51E-005 |      | 1.93  | 0.08 |      | 1.11  | 0.16  |      | calmodulin 1                                                               |
| Pc_TC102856 | 0.6   | 0.3   |      | 0.22  | 0.76      |      | -2.53 | 0.03 | Down | -0.75 | 0.32  |      | Expressed protein                                                          |
| Pc_TC102859 | 0.67  | 0.29  |      | 1.93  | 0         | Up   | 0.06  | 0.97 |      | 0.63  | 0.41  |      | Expressed protein                                                          |
| Pc_TC102891 | -0.84 | 0.37  |      | -2.71 | 0.03      | Down | 1.79  | 0.12 |      | 0.77  | 0.38  |      | Expressed protein                                                          |
| Pc_TC102897 | -0.15 | 0.68  |      | 0.22  | 0.64      |      | 1.41  | 0.1  |      | 1.29  | 0.01  | Up   | Expressed protein                                                          |
| Pc_TC102907 | -1.11 | 0.25  |      | -0.19 | 0.88      |      | 3.68  | 0    | Up   | 2.42  | 0     | Up   | Expressed protein                                                          |
| Pc_TC102912 | -0.27 | 0.89  |      | -0.43 | 0.8       |      | 2.5   | 0.05 | Up   | -0.48 | 0.75  |      | Expressed protein                                                          |
| Pc_TC102916 | 3.16  | ##### | Up   | 0     | 0         |      | 2.99  | 0.01 | Up   | 1.9   | 0.03  | Up   | Expressed protein                                                          |
| Pc_TC102930 | 0.59  | 0.74  |      | 2.71  | 0.02      | Up   | -0.3  | 0.95 |      | 0.14  | 1     |      | Ribosomal protein S3 family protein                                        |
| Pc_TC102937 | 0.2   | 0.75  |      | -0.87 | 0.26      |      | -0.22 | 0.85 |      | 1.6   | 0.02  | Up   | Expressed protein                                                          |
| Pc_TC102938 | 2.45  | ##### | Up   | 0     | 2.85E-006 |      | 2.62  | 0.01 | Up   | 1.24  | 0.09  |      | isopentenyl diphosphate isomerase 1                                        |
| Pc_TC102956 | 0.33  | 0.54  |      | 0.06  | 0.94      |      | 0.69  | 0.5  |      | 1.27  | 0.05  | Up   | Expressed protein                                                          |
| Pc_TC102981 | -0.69 | 0.25  |      | -1.62 | 0.03      | Down | 0.79  | 0.44 |      | 0.18  | 0.8   |      | Uncharacterized protein                                                    |
| Pc_TC102985 | 1.71  | 0.03  | Up   | -0.02 | 1         |      | 1.54  | 0.22 |      | 2.26  | 0.01  | Up   | Expressed protein                                                          |
| Pc_TC102987 | -0.62 | 0.24  |      | -1.92 | 0.01      | Down | -2.49 | 0.02 | Down | -2.57 | 0     | Down | Expressed protein                                                          |
| Pc_TC103010 | -0.38 | 0.58  |      | 0.29  | 0.71      |      | -1.91 | 0.11 |      | -1.88 | 0.03  | Down | Expressed protein                                                          |
| Pc_TC103013 | 0.56  | 0.46  |      | 1.58  | 0.05      | Up   | -3.01 | 0.04 | Down | -0.89 | 0.36  |      | Expressed protein                                                          |
| Pc_TC103015 | 0.23  | 0.83  |      | -0.58 | 0.61      |      | 1.68  | 0.15 |      | 2.49  | 0     | Up   | Expressed protein                                                          |
| Pc_TC103018 | 0.27  | 0.72  |      | 0.75  | 0.34      |      | -3.16 | 0.02 | Down | -2.51 | 0.01  | Down | Expressed protein                                                          |
| Pc_TC103020 | 0.66  | 0.47  |      | 1.09  | 0.26      |      | 0     | 0.01 |      | -2.83 | 0.04  | Down | Expressed protein                                                          |
| Pc_TC103024 | 0.31  | 0.71  |      | 1.31  | 0.11      |      | -2.82 | 0.05 | Down | -1.45 | 0.15  |      | Uncharacterized protein                                                    |
| Pc_TC103033 | -1.02 | 0.45  |      | 0.4   | 0.78      |      | -4.4  | 0.05 | Down | -1.11 | 0.42  |      | Expressed protein                                                          |
| Pc_TC103041 | 2.8   | 0     | Up   | 0     | 0.07      |      | 2.56  | 0.06 |      | 1.3   | 0.26  |      | Expressed protein                                                          |
| Pc_TC103053 | 0.3   | 0.86  |      | 2.28  | 0.02      | Up   | 0     | 0.03 |      | -1.64 | 0.29  |      | Ribosomal protein S8e family protein                                       |
| Pc_TC103063 | 1.84  | 0.16  |      | 2.26  | 0.09      |      | 0.77  | 0.74 |      | 2.7   | 0.03  | Up   | Expressed protein                                                          |
| Pc_TC103102 | -0.49 | 0.18  |      | -0.28 | 0.54      |      | -1.87 | 0.04 | Down | -1.5  | 0.01  | Down | Expressed protein                                                          |
| Pc_TC103103 | 0.32  | 0.34  |      | 0.21  | 0.63      |      | -1.81 | 0.04 | Down | -1.09 | 0.04  | Down | Expressed protein                                                          |
| Pc_TC103105 | 1.18  | 0.04  | Up   | 0     | 1.04E-007 |      | 0.86  | 0.42 |      | -0.28 | 0.72  |      | arginosuccinate synthase family                                            |
| Pc_TC103111 | -1.16 | 0.05  |      | -1.97 | 0.01      | Down | 1.06  | 0.29 |      | 0.17  | 0.8   |      | Expressed protein                                                          |
| Pc_TC103134 | -0.51 | 0.59  |      | 0.06  | 0.99      |      | -3.22 | 0.04 | Down | -1.96 | 0.07  |      | Expressed protein                                                          |
| Pc_TC103136 | -1.12 | 0.31  |      | 0.39  | 0.73      |      | -1.44 | 0.34 |      | -4.9  | 0     | Down | Expressed protein                                                          |
| Pc_TC103140 | -3.94 | ##### | Down | -5.28 | 1.64E-007 | Down | -1.33 | 0.22 |      | -4.71 | ##### | Down | cytochrome oxidase 2                                                       |
| Pc_TC103155 | 1.5   | 0.04  | Up   | 0.8   | 0.38      |      | -0.75 | 0.58 |      | 0.45  | 0.64  |      | Uncharacterized protein                                                    |

|             |       |       |      |       |           |      |       |           |      |       |      |      |                                                                     |
|-------------|-------|-------|------|-------|-----------|------|-------|-----------|------|-------|------|------|---------------------------------------------------------------------|
| Pc_TC103159 | 2.63  | 0     | Up   | -0.18 | 0.96      |      | -1.03 | 0.56      |      | 2.05  | 0.04 | Up   | Expressed protein                                                   |
| Pc_TC103161 | -0.55 | 0.27  |      | -1.86 | 0         | Down | 0.45  | 0.64      |      | 0.01  | 0.99 |      | Expressed protein                                                   |
| Pc_TC103183 | -0.05 | 0.94  |      | 1.19  | 0.06      |      | -3.93 | 0         | Down | -0.02 | 0.99 |      | Expressed protein                                                   |
| Pc_TC103189 | 1.8   | 0.01  | Up   | 0     | 0         |      | 0.93  | 0.43      |      | -0.2  | 0.86 |      | mitochondrial lipoamide dehydrogenase 1                             |
| Pc_TC103199 | 0.1   | 0.91  |      | 0.23  | 0.78      |      | -2.84 | 0.03      | Down | -1.57 | 0.07 |      | Expressed protein                                                   |
| Pc_TC103204 | -0.08 | 0.86  |      | 0.01  | 1         |      | -1.07 | 0.28      |      | -1.36 | 0.03 | Down | Expressed protein                                                   |
| Pc_TC103213 | 0.01  | 0.99  |      | 0.85  | 0.15      |      | -4.83 | 0         | Down | -2.65 | 0    | Down | Expressed protein                                                   |
| Pc_TC103241 | -3.73 | 0.05  | Down | -0.05 | 1         |      | 1.55  | 0.25      |      | 0.46  | 0.72 |      | Expressed protein                                                   |
| Pc_TC103243 | 0.61  | 0.29  |      | 0.37  | 0.6       |      | -2.36 | 0.04      | Down | -1.17 | 0.13 |      | Expressed protein                                                   |
| Pc_TC103246 | -0.78 | 0.26  |      | 0.27  | 0.73      |      | -3.17 | 0.01      | Down | -0.92 | 0.25 |      | Expressed protein                                                   |
| Pc_TC103248 | 2.16  | 0.01  | Up   | 1.75  | 0.09      |      | 1.42  | 0.3       |      | 1.32  | 0.22 |      | Expressed protein                                                   |
| Pc_TC103250 | 2.21  | 0     | Up   | -3.19 | 0.05      |      | -0.16 | 0.95      |      | 1.61  | 0.08 |      | Expressed protein                                                   |
| Pc_TC103251 | 0.61  | 0.55  |      | 1.21  | 0.23      |      | -3.67 | 0.06      |      | 2.25  | 0.01 | Up   | Expressed protein                                                   |
| Pc_TC103259 | -1.66 | 0.08  |      | -1.94 | 0.07      |      | -4.82 | 0         | Down | -3.11 | 0.01 | Down | Expressed protein                                                   |
| Pc_TC103262 | -2.92 | 0.01  | Down | -2.68 | 0.02      | Down | 0.01  | 1         |      | -0.57 | 0.55 |      | Expressed protein                                                   |
| Pc_TC103272 | 1.14  | 0.05  | Up   | 0     | 1.73E-007 |      | 0.89  | 0.4       |      | -0.8  | 0.31 |      | putative Mutator sub-class                                          |
| Pc_TC103282 | 0.5   | 0.14  |      | 0.66  | 0.13      |      | -3.48 | 0         | Down | -1.68 | 0    | Down | Expressed protein                                                   |
| Pc_TC103301 | 1     | 0.1   |      | 1.7   | 0.01      | Up   | -2.1  | 0.08      |      | -0.81 | 0.32 |      | Expressed protein                                                   |
| Pc_TC103324 | 1.21  | 0.03  | Up   | 1.5   | 0.02      | Up   | 0.19  | 0.87      |      | 1.01  | 0.15 |      | Expressed protein                                                   |
| Pc_TC103326 | 0     | 0.09  |      | 0     | 0.11      |      | 5.32  | 3.07E-005 | Up   | -2.37 | 0.25 |      | Expressed protein                                                   |
| Pc_TC103343 | 0.14  | 0.84  |      | 2.04  | 0         | Up   | -3.91 | 0         | Down | -3.05 | 0    | Down | Expressed protein                                                   |
| Pc_TC103348 | 0.09  | 0.8   |      | 0.78  | 0.08      |      | -4.01 | 8.97E-005 | Down | -1.41 | 0.01 | Down | Expressed protein                                                   |
| Pc_TC103353 | 0.35  | 0.51  |      | 0.85  | 0.17      |      | -2.69 | 0.02      | Down | -2.22 | 0    | Down | Expressed protein                                                   |
| Pc_TC103363 | -0.75 | 0.15  |      | -1.54 | 0.02      | Down | -0.97 | 0.34      |      | -1.5  | 0.03 | Down | ubiquitin-specific protease 26                                      |
| Pc_TC103379 | 0.17  | 0.83  |      | 0.38  | 0.64      |      | -2.47 | 0.06      |      | -2.45 | 0.01 | Down | Expressed protein                                                   |
| Pc_TC103395 | -1.17 | 0.07  |      | -2.07 | 0.01      | Down | 0.92  | 0.37      |      | -1.35 | 0.07 |      | Expressed protein                                                   |
| Pc_TC103415 | 1.97  | 0.04  | Up   | 0     | 0.07      |      | 1.35  | 0.36      |      | 1.06  | 0.39 |      | Uncharacterized protein                                             |
| Pc_TC103422 | -2.67 | 0     | Down | -1.55 | 0.09      |      | 0.99  | 0.37      |      | 0.05  | 0.97 |      | Expressed protein                                                   |
| Pc_TC103431 | 0.37  | 0.55  |      | 0.9   | 0.19      |      | -3.39 | 0.01      | Down | -0.95 | 0.22 |      | Thiamin diphosphate-binding fold (THDP-binding) superfamily protein |
| Pc_TC103439 | 0.8   | 0.11  |      | 1.18  | 0.05      | Up   | -1.92 | 0.08      |      | -0.98 | 0.16 |      | Putative polyprotein                                                |
| Pc_TC103453 | 0.31  | 0.64  |      | 0.68  | 0.35      |      | -2.43 | 0.05      | Down | -1.19 | 0.14 |      | Expressed protein                                                   |
| Pc_TC103456 | 1.53  | 0     | Up   | 0     | 7.12E-009 |      | 1.97  | 0.05      |      | -0.02 | 0.99 |      | ARP protein (REF)                                                   |
| Pc_TC103457 | 0.89  | 0.09  |      | 1.39  | 0.02      | Up   | -0.11 | 0.92      |      | 0.67  | 0.32 |      | Expressed protein                                                   |
| Pc_TC103459 | -4.62 | 0     | Down | -3.06 | 0.03      | Down | -0.5  | 0.73      |      | -0.55 | 0.62 |      | Putative gag-pol                                                    |
| Pc_TC103478 | -0.42 | 0.61  |      | -2.07 | 0.05      | Down | 0.6   | 0.61      |      | 0.31  | 0.73 |      | Expressed protein                                                   |
| Pc_TC103481 | 0.6   | 0.27  |      | 0.9   | 0.16      |      | 0     | 8.81E-007 |      | -2.62 | 0    | Down | Expressed protein                                                   |
| Pc_TC103491 | -1.9  | 0.03  | Down | -0.14 | 0.89      |      | 0.42  | 0.72      |      | -0.2  | 0.83 |      | Expressed protein                                                   |
| Pc_TC103499 | -3.09 | 0.02  | Down | -0.3  | 0.81      |      | -1    | 0.48      |      | -1.54 | 0.17 |      | unknown protein                                                     |
| Pc_TC103517 | -1.12 | 0.14  |      | -1.8  | 0.05      | Down | 0.27  | 0.82      |      | -0.37 | 0.66 |      | Expressed protein                                                   |
| Pc_TC103528 | 0.03  | 0.98  |      | -0.27 | 0.74      |      | -1.72 | 0.14      |      | -1.72 | 0.04 | Down | Expressed protein                                                   |
| Pc_TC103530 | 0.57  | 0.51  |      | -0.61 | 0.6       |      | -3.25 | 0.05      | Down | -1.43 | 0.2  |      | Expressed protein                                                   |
| Pc_TC103537 | -1.37 | 0.04  | Down | -1.55 | 0.05      | Down | 0     | 1         |      | -1.2  | 0.11 |      | Expressed protein                                                   |
| Pc_TC103544 | -0.07 | 0.96  |      | -0.19 | 0.85      |      | -3    | 0.03      | Down | -1.46 | 0.12 |      | Expressed protein                                                   |
| Pc_TC103555 | 0.82  | 0.79  |      | 2.93  | 0.05      | Up   | 0     | 0.36      |      | 0.85  | 0.76 |      | Expressed protein                                                   |
| Pc_TC103562 | 0.26  | 0.54  |      | 1.07  | 0.04      | Up   | -1.46 | 0.14      |      | -0.28 | 0.64 |      | Expressed protein                                                   |
| Pc_TC103570 | -0.03 | 0.99  |      | 0.78  | 0.26      |      | -4.56 | 0         | Down | -1.93 | 0.02 | Down | Expressed protein                                                   |
| Pc_TC103580 | -2.04 | 0.2   |      | -1.06 | 0.51      |      | -4.2  | 0.07      |      | -4.08 | 0.04 | Down | Expressed protein                                                   |
| Pc_TC103584 | 0.13  | 0.67  |      | 0.13  | 0.73      |      | -1.78 | 0.04      | Down | -1.14 | 0.02 | Down | Expressed protein                                                   |
| Pc_TC103603 | 0.7   | 0.36  |      | 0.4   | 0.67      |      | 3.72  | 0         | Up   | 0.57  | 0.52 |      | Expressed protein                                                   |
| Pc_TC103645 | -0.28 | 0.71  |      | -0.56 | 0.52      |      | -2.77 | 0.04      | Down | -2.77 | 0    | Down | Uncharacterized protein                                             |
| Pc_TC103650 | -0.23 | 0.78  |      | -2.18 | 0.03      | Down | -0.34 | 0.79      |      | -0.65 | 0.47 |      | Expressed protein                                                   |
| Pc_TC103655 | 0.58  | 0.19  |      | 0.63  | 0.25      |      | -2.97 | 0.01      | Down | -0.61 | 0.33 |      | Expressed protein                                                   |
| Pc_TC103656 | 1.34  | 0.04  | Up   | 1.24  | 0.11      |      | 0.22  | 0.87      |      | -2.61 | 0.01 | Down | Expressed protein                                                   |
| Pc_TC103673 | 0.5   | 0.35  |      | 0.52  | 0.41      |      | -2.52 | 0.03      | Down | -0.5  | 0.48 |      | Putative uncharacterized protein B1140D12.25                        |
| Pc_TC103686 | 2.39  | 0     | Up   | 0     | 0         |      | -0.55 | 0.7       |      | -0.23 | 0.85 |      | RmlC-like cupins superfamily protein                                |
| Pc_TC103687 | 3.08  | ##### | Up   | 0     | 0         |      | -1.33 | 0.36      |      | -0.7  | 0.53 |      | Protein of unknown function (DUF1216)                               |
| Pc_TC103688 | -2.38 | 0.01  | Down | 0     | 4.13E-006 |      | 1.94  | 0.07      |      | 0.06  | 0.96 |      | RmlC-like cupins superfamily protein                                |
| Pc_TC103692 | -1.72 | 0.05  | Down | -0.12 | 0.91      |      | -0.03 | 1         |      | -0.68 | 0.45 |      | Expressed protein                                                   |
| Pc_TC103693 | -0.4  | 0.68  |      | 0.27  | 0.8       |      | -3.5  | 0.03      | Down | -2.79 | 0.02 | Down | Uncharacterized protein                                             |
| Pc_TC103705 | 0.34  | 0.42  |      | 1.08  | 0.03      | Up   | -0.62 | 0.51      |      | 0.14  | 0.81 |      | Expressed protein                                                   |
| Pc_TC103707 | 0     | 0     |      | -2.26 | 0.12      |      | -3.82 | 0.04      | Down | 0     | 0    |      | Expressed protein                                                   |
| Pc_TC103724 | 1.89  | 0.02  | Up   | 2.67  | 0         | Up   | 0     | 0.01      |      | -3.37 | 0.04 | Down | Expressed protein                                                   |

|             |       |       |      |       |           |      |       |           |      |       |       |      |                                                         |
|-------------|-------|-------|------|-------|-----------|------|-------|-----------|------|-------|-------|------|---------------------------------------------------------|
| Pc_TC103789 | 2.08  | 0.02  | Up   | 0     | 0.05      |      | 1.72  | 0.22      |      | 0.17  | 0.96  |      | Expressed protein                                       |
| Pc_TC103792 | 1.4   | 0.03  | Up   | 0     | 2.64E-005 |      | 1.12  | 0.32      |      | -0.24 | 0.79  |      | Expressed protein                                       |
| Pc_TC103796 | -0.84 | 0.37  |      | -1.44 | 0.19      |      | -0.88 | 0.51      |      | -3.14 | 0.01  | Down | Expressed protein                                       |
| Pc_TC103812 | 0.75  | 0.01  |      | 0.19  | 0.63      |      | -2.54 | 0         | Down | -0.85 | 0.09  |      | Expressed protein                                       |
| Pc_TC103815 | -0.07 | 0.91  |      | 0.43  | 0.51      |      | -2.3  | 0.04      | Down | -1.28 | 0.08  |      | Expressed protein                                       |
| Pc_TC103824 | -3.38 | 0.02  | Down | -4.4  | 0.01      | Down | -1.79 | 0.25      |      | -1.37 | 0.25  |      | Tetratricopeptide repeat (TPR)-like superfamily protein |
| Pc_TC103827 | 0.65  | 0.23  |      | 0.47  | 0.47      |      | -2.29 | 0.04      | Down | -1.63 | 0.03  | Down | Expressed protein                                       |
| Pc_TC103831 | 1.93  | 0     | Up   | 0     | 9.94E-005 |      | 0.91  | 0.43      |      | -0.1  | 0.93  |      | Uncharacterized protein (Fragment)                      |
| Pc_TC103837 | 1.83  | 0.01  | Up   | 0     | 0         |      | 1.65  | 0.17      |      | -0.63 | 0.58  |      | Expressed protein                                       |
| Pc_TC103838 | -0.03 | 1     |      | 0.67  | 0.4       |      | -2.24 | 0.08      |      | -2.75 | 0.01  | Down | Uncharacterized protein (Fragment)                      |
| Pc_TC103839 | -0.63 | 0.61  |      | 0.06  | 1         |      | -4.67 | 0.03      | Down | -2.22 | 0.11  |      | Uncharacterized protein                                 |
| Pc_TC103849 | -0.92 | 0.3   |      | -2.38 | 0.04      | Down | 0.65  | 0.59      |      | 0.21  | 0.84  |      | Expressed protein                                       |
| Pc_TC103854 | 0.32  | 0.59  |      | 1.02  | 0.12      |      | -1.87 | 0.1       |      | -1.95 | 0.02  | Down | Uncharacterized protein                                 |
| Pc_TC103875 | -1.68 | 0.06  |      | -3.4  | 0.01      | Down | 1.16  | 0.31      |      | 0.21  | 0.83  |      | Expressed protein                                       |
| Pc_TC103877 | -0.43 | 0.64  |      | -0.63 | 0.54      |      | -3.38 | 0.03      | Down | -0.68 | 0.49  |      | Putative reverse transcriptase                          |
| Pc_TC103878 | -0.83 | 0.32  |      | 0.67  | 0.42      |      | -1.01 | 0.42      |      | -2.23 | 0.03  | Down | Expressed protein                                       |
| Pc_TC103880 | -5.17 | 0     | Down | -4.19 | 0         | Down | 0.32  | 0.81      |      | -1.92 | 0.07  |      | Expressed protein                                       |
| Pc_TC103882 | -0.31 | 0.81  |      | -0.16 | 0.93      |      | -3.89 | 0.04      | Down | -1.07 | 0.37  |      | Expressed protein                                       |
| Pc_TC103885 | -0.82 | 0.3   |      | -0.65 | 0.47      |      | -3.93 | 0.01      | Down | -2.13 | 0.03  | Down | Glycosyltransferase family-like                         |
| Pc_TC103888 | 2.43  | 0.01  | Up   | 0     | 0.07      |      | 1.57  | 0.27      |      | 0.47  | 0.76  |      | Expressed protein                                       |
| Pc_TC103901 | -0.34 | 0.8   |      | 0.59  | 0.59      |      | 2.82  | 0.02      | Up   | 3.06  | 0     | Up   | Expressed protein                                       |
| Pc_TC103902 | -0.45 | 0.69  |      | 1.78  | 0.04      | Up   | -3.44 | 0.05      | Down | -2.9  | 0.03  | Down | Expressed protein                                       |
| Pc_TC103917 | -1.17 | 0.2   |      | -0.73 | 0.47      |      | -3.16 | 0.03      | Down | -0.76 | 0.43  |      | cysteine-rich RLK (RECEPTOR-like protein kinase) 8      |
| Pc_TC103946 | -0.06 | 0.96  |      | 1.15  | 0.13      |      | 0     | 0         |      | -3.83 | 0     | Down | Expressed protein                                       |
| Pc_TC103952 | 0.4   | 0.74  |      | 0.31  | 0.84      |      | 3.19  | 0.01      | Up   | 2.08  | 0.02  | Up   | Expressed protein                                       |
| Pc_TC103982 | 1.49  | 0.01  | Up   | 0.87  | 0.19      |      | -0.4  | 0.71      |      | 1.31  | 0.05  |      | Expressed protein                                       |
| Pc_TC103988 | 1.14  | 0.17  |      | -0.38 | 0.77      |      | 3.35  | 0         | Up   | 1.33  | 0.14  |      | Expressed protein                                       |
| Pc_TC104012 | -0.03 | 1     |      | 1.59  | 0.04      | Up   | 0.43  | 0.73      |      | -0.05 | 0.98  |      | Expressed protein                                       |
| Pc_TC104025 | 0.53  | 0.51  |      | -0.55 | 0.6       |      | -3.3  | 0.03      | Down | -1.11 | 0.27  |      | Expressed protein                                       |
| Pc_TC104027 | -0.11 | 0.88  |      | -0.12 | 0.9       |      | -3.96 | 0         | Down | -3.03 | 0     | Down | Expressed protein                                       |
| Pc_TC104030 | -0.73 | 0.61  |      | -0.58 | 0.72      |      | -3.3  | 0.1       |      | -4.18 | 0.03  | Down | Expressed protein                                       |
| Pc_TC104041 | 0.66  | 0.44  |      | 0.75  | 0.44      |      | -4.2  | 0.02      | Down | -1.62 | 0.16  |      | Expressed protein                                       |
| Pc_TC104043 | 2.66  | 0.03  | Up   | 0     | 0.36      |      | 1.2   | 0.58      |      | -0.37 | 0.99  |      | Expressed protein                                       |
| Pc_TC104057 | 2.89  | 0.03  | Up   | 1.28  | 0.58      |      | 0.73  | 0.85      |      | 3.04  | 0.03  | Up   | Expressed protein                                       |
| Pc_TC104058 | 4.66  | 0     | Up   | 3.06  | 0.22      |      | 4.15  | 0.06      |      | 4.43  | 0.01  | Up   | Expressed protein                                       |
| Pc_TC104065 | 0.34  | 0.73  |      | 0.84  | 0.38      |      | -0.97 | 0.5       |      | -2.7  | 0.04  | Down | Expressed protein                                       |
| Pc_TC104071 | -0.18 | 0.81  |      | 0.68  | 0.37      |      | -1.44 | 0.23      |      | -1.76 | 0.05  | Down | Expressed protein                                       |
| Pc_TC104086 | -0.62 | 0.38  |      | -0.01 | 1         |      | -1.75 | 0.14      |      | -2.19 | 0.01  | Down | Expressed protein                                       |
| Pc_TC104099 | -1.81 | 0.11  |      | -4.64 | 0.01      | Down | 0     | 0         |      | -4.08 | 0.01  | Down | Expressed protein                                       |
| Pc_TC104117 | -1.84 | 0.01  | Down | -0.68 | 0.4       |      | -0.53 | 0.64      |      | -0.98 | 0.22  |      | Expressed protein                                       |
| Pc_TC104132 | 0.01  | 1     |      | 1.24  | 0.19      |      | -3.96 | 0.03      | Down | -1.25 | 0.29  |      | Expressed protein                                       |
| Pc_TC104133 | -2.88 | ##### | Down | -2.83 | 7.69E-005 | Down | -0.75 | 0.46      |      | -3.13 | ##### | Down | Expressed protein                                       |
| Pc_TC104151 | 0.85  | 0.24  |      | 1.64  | 0.03      | Up   | -2.05 | 0.13      |      | -0.51 | 0.58  |      | Expressed protein                                       |
| Pc_TC104164 | -3.78 | 0.01  | Down | -0.89 | 0.43      |      | 0.6   | 0.64      |      | 0.02  | 1     |      | Expressed protein                                       |
| Pc_TC104176 | -0.19 | 0.85  |      | 1.56  | 0.06      |      | -3.63 | 0.02      | Down | -2.7  | 0.02  | Down | Expressed protein                                       |
| Pc_TC104182 | 0.15  | 0.93  |      | 0.94  | 0.36      |      | 0     | 0.01      |      | -3.62 | 0.02  | Down | Expressed protein                                       |
| Pc_TC104183 | -1.77 | 0.18  |      | -0.65 | 0.64      |      | -0.58 | 0.72      |      | -4.54 | 0.01  | Down | Uncharacterized protein                                 |
| Pc_TC104189 | 0.75  | 0.14  |      | 1     | 0.1       |      | -4.82 | 0         | Down | -3.11 | ##### | Down | Expressed protein                                       |
| Pc_TC104193 | 0.55  | 0.59  |      | 2.23  | 0.01      | Up   | -0.21 | 0.92      |      | -0.22 | 0.89  |      | Ribosomal protein L31e family protein                   |
| Pc_TC104196 | -1.47 | 0.06  |      | -1.82 | 0.05      | Down | 1.39  | 0.2       |      | 0.1   | 0.92  |      | Expressed protein                                       |
| Pc_TC104229 | -0.15 | 0.82  |      | 0.23  | 0.74      |      | -2.19 | 0.06      |      | -1.7  | 0.03  | Down | Expressed protein                                       |
| Pc_TC104265 | 2.43  | 0.01  | Up   | 0     | 0.09      |      | 2.01  | 0.16      |      | -0.22 | 0.96  |      | Putative polyprotein                                    |
| Pc_TC104267 | -2.86 | 0.03  | Down | -1.47 | 0.25      |      | -0.5  | 0.74      |      | -1.09 | 0.35  |      | Expressed protein                                       |
| Pc_TC104268 | -0.21 | 0.69  |      | 0.46  | 0.44      |      | -4.94 | 7.25E-005 | Down | -3.3  | ##### | Down | Expressed protein                                       |
| Pc_TC104301 | -0.12 | 0.86  |      | -0.1  | 0.9       |      | -2.72 | 0.02      | Down | -1.31 | 0.09  |      | Expressed protein                                       |
| Pc_TC104302 | -2.09 | 0.07  |      | -2.7  | 0.05      | Down | 1     | 0.42      |      | -0.04 | 1     |      | Expressed protein                                       |
| Pc_TC104338 | -1.6  | 0.01  | Down | -1    | 0.15      |      | 0.17  | 0.87      |      | -0.13 | 0.86  |      | Expressed protein                                       |
| Pc_TC104346 | 0.51  | 0.57  |      | -0.18 | 0.9       |      | 2.32  | 0.05      | Up   | 2.13  | 0.01  | Up   | Expressed protein                                       |
| Pc_TC104361 | 0.55  | 0.55  |      | 0.66  | 0.52      |      | -1.21 | 0.41      |      | -3.31 | 0.02  | Down | Expressed protein                                       |
| Pc_TC104366 | -2.27 | 0.01  | Down | -3.16 | 0         | Down | 1.6   | 0.15      |      | -0.54 | 0.54  |      | Expressed protein                                       |
| Pc_TC104373 | 1.63  | 0     | Up   | 2.13  | 0         | Up   | -2.32 | 0.05      |      | -1.97 | 0.02  | Down | Expressed protein                                       |
| Pc_TC104378 | -1.18 | 0.28  |      | -3.53 | 0.02      | Down | 0.01  | 1         |      | -0.44 | 0.71  |      | Expressed protein                                       |

|             |       |       |      |  |       |           |      |  |       |           |      |       |       |      |                                                                               |     |
|-------------|-------|-------|------|--|-------|-----------|------|--|-------|-----------|------|-------|-------|------|-------------------------------------------------------------------------------|-----|
| Pc_TC104381 | 2.18  | 0.04  | Up   |  | 0     | 0.15      |      |  | 1.28  | 0.44      |      | -1.6  | 0.44  |      | Expressed protein                                                             |     |
| Pc_TC104396 | 3.09  | ##### | Up   |  | 0     | 0.03      |      |  | 1.45  | 0.29      |      | -0.27 | 0.89  |      | TCP-1/cpn60 chaperonin family protein                                         |     |
| Pc_TC104399 | 0.4   | 0.58  |      |  | 0.01  | 1         |      |  | -2.84 | 0.03      | Down | 0.07  | 0.96  |      | Expressed protein                                                             |     |
| Pc_TC104408 | 3.44  | 0     | Up   |  | 0     | 0.36      |      |  | 2.67  | 0.1       |      | 1.08  | 0.57  |      | Expressed protein                                                             |     |
| Pc_TC104410 | 0.49  | 0.3   |      |  | 0.58  | 0.31      |      |  | -2.67 | 0.01      | Down | -1.6  | 0.02  | Down | Uncharacterized protein                                                       |     |
| Pc_TC104423 | -2.38 | 0     | Down |  | -2    | 0.01      | Down |  | 0.21  | 0.84      |      | 0.02  | 0.99  |      | Expressed protein                                                             |     |
| Pc_TC104424 | 0.36  | 0.68  |      |  | 0.87  | 0.33      |      |  | -2.08 | 0.14      |      | -2.83 | 0.02  | Down | Expressed protein                                                             |     |
| Pc_TC104426 | -1.77 | 0.18  |      |  | -3.11 | 0.06      |      |  | -3.67 | 0.06      |      | -3.54 | 0.03  | Down | Expressed protein                                                             |     |
| Pc_TC104440 | 0.18  | 0.7   |      |  | 0.1   | 0.87      |      |  | -1.85 | 0.07      |      | -1.55 | 0.02  | Down | Expressed protein                                                             |     |
| Pc_TC104447 | 0.21  | 0.77  |      |  | -1.22 | 0.16      |      |  | -5.14 | 0         | Down | -1.96 | 0.03  | Down | Expressed protein                                                             |     |
| Pc_TC104448 | 4.85  | ##### | Up   |  | 7.47  | 7.26E-018 | Up   |  | 0.31  | 0.99      |      | 2.58  | 0.05  |      | Expressed protein                                                             |     |
| Pc_TC104449 | 0.08  | 0.97  |      |  | 0.53  | 0.58      |      |  | -3.13 | 0.05      | Down | -0.16 | 0.9   |      | Expressed protein                                                             |     |
| Pc_TC104459 | 1.33  | 0.02  | Up   |  | 1.53  | 0.02      | Up   |  | -0.48 | 0.67      |      | 1.39  | 0.05  | Up   | Protein kinase superfamily protein                                            |     |
| Pc_TC104470 | -0.64 | 0.12  |      |  | -1.9  | 0         | Down |  | 1.61  | 0.07      |      | 1.07  | 0.05  | Up   | Expressed protein                                                             |     |
| Pc_TC104492 | 1.34  | 0.21  |      |  | 2.69  | 0.01      | Up   |  | -0.82 | 0.69      |      | 1.76  | 0.11  |      | Expressed protein                                                             |     |
| Pc_TC104504 | -1.34 | 0.32  |      |  | 0.23  | 0.9       |      |  | 0.03  | 1         |      | -3.37 | 0.04  | Down | Expressed protein                                                             |     |
| Pc_TC104513 | -0.37 | 0.73  |      |  | 0     | 1         |      |  | -4.2  | 0.02      | Down | 0     | 0     |      | Uncharacterized protein (Fragment)                                            |     |
| Pc_TC104516 | -1.92 | 0.02  | Down |  | -0.74 | 0.39      |      |  | 2.51  | 0.02      | Up   | 1.38  | 0.06  |      | Expressed protein                                                             |     |
| Pc_TC104530 | 0.15  | 0.67  |      |  | 0.19  | 0.68      |      |  | -1.85 | 0.04      | Down | -0.86 | 0.11  |      | Expressed protein                                                             |     |
| Pc_TC104539 | 0.28  | 0.59  |      |  | 0.55  | 0.37      |      |  | -2.52 | 0.02      | Down | -1.43 | 0.04  | Down | Expressed protein                                                             |     |
| Pc_TC104540 | 0.89  | 0.07  |      |  | 1.28  | 0.03      | Up   |  | -0.56 | 0.59      |      | 0.53  | 0.41  |      | Expressed protein                                                             |     |
| Pc_TC104547 | 0.71  | 0.3   |      |  | 0.56  | 0.49      |      |  | -2.82 | 0.04      | Down | -0.7  | 0.43  |      | Expressed protein                                                             |     |
| Pc_TC104575 | -2.34 | 0.01  | Down |  | -1.24 | 0.18      |      |  | 1.09  | 0.33      |      | 0.08  | 0.94  |      | Expressed protein                                                             |     |
| Pc_TC104584 | 0.47  | 0.61  |      |  | 2.2   | 0.01      | Up   |  | -3.2  | 0.05      |      | -2.49 | 0.04  | Down | Expressed protein                                                             |     |
| Pc_TC104610 | 1.43  | 0.2   |      |  | 2.17  | 0.05      | Up   |  | 2.17  | 0.12      |      | 1.85  | 0.1   |      | Uncharacterized protein                                                       |     |
| Pc_TC104612 | 0.13  | 0.93  |      |  | -0.83 | 0.47      |      |  | 2.96  | 0.01      | Up   | 0.9   | 0.33  |      | Uncharacterized protein (Fragment)                                            |     |
| Pc_TC104629 | 0.9   | 0.22  |      |  | 1.66  | 0.04      | Up   |  | 0.45  | 0.72      |      | 0.05  | 0.99  |      | Expressed protein                                                             |     |
| Pc_TC104654 | -1.07 | 0.13  |      |  | -2.16 | 0.01      | Down |  | 0.59  | 0.59      |      | -0.98 | 0.22  |      | Expressed protein                                                             |     |
| Pc_TC104675 | 1.36  | 0.15  |      |  | 1.95  | 0.05      | Up   |  | 0.4   | 0.82      |      | 0.46  | 0.72  |      | Expressed protein                                                             |     |
| Pc_TC104684 | 0.63  | 0.33  |      |  | 0.29  | 0.72      |      |  | -1.87 | 0.12      |      | -2.6  | 0.01  | Down | Expressed protein                                                             |     |
| Pc_TC104686 | -1.6  | 0.07  |      |  | -2.2  | 0.04      | Down |  | -0.08 | 0.96      |      | -0.23 | 0.81  |      | Expressed protein                                                             |     |
| Pc_TC104692 | 0     | 1     |      |  | 0.41  | 0.74      |      |  | -2.08 | 0.21      |      | -4.54 | 0.01  | Down | Expressed protein                                                             |     |
| Pc_TC104704 | -0.37 | 0.63  |      |  | -0.56 | 0.52      |      |  | -2.82 | 0.03      | Down | -0.96 | 0.27  |      | Expressed protein                                                             |     |
| Pc_TC104711 | 0.4   | 0.47  |      |  | 0.69  | 0.28      |      |  | -2.23 | 0.05      | Down | -0.69 | 0.33  |      | Expressed protein                                                             |     |
| Pc_TC104717 | 0.98  | 0.03  |      |  | 0.06  | 0.93      |      |  | -2.94 | 0.01      | Down | 0.35  | 0.57  |      | Uncharacterized protein                                                       |     |
| Pc_TC104719 | 1.33  | 0.04  | Up   |  | 1.31  | 0.08      |      |  | -0.68 | 0.57      |      | 1.05  | 0.17  |      | Expressed protein                                                             |     |
| Pc_TC104729 | -0.71 | 0.3   |      |  | -0.76 | 0.34      |      |  | -2.61 | 0.03      | Down | -1.09 | 0.17  |      | Expressed protein                                                             |     |
| Pc_TC104746 | 1.08  | 0.17  |      |  | 1.77  | 0.04      | Up   |  | -3.3  | 0.04      | Down | -0.93 | 0.39  |      | Expressed protein                                                             |     |
| Pc_TC104768 | 2.33  | 0.08  |      |  | 1.38  | 0.45      |      |  | 1.5   | 0.45      |      | 2.8   | 0.03  | Up   | Expressed protein                                                             |     |
| Pc_TC104776 | 0.41  | 0.55  |      |  | 1     | 0.18      |      |  | -3.2  | 0.02      | Down | -1.64 | 0.07  |      | Expressed protein                                                             |     |
| Pc_TC104786 | 0.27  | 0.54  |      |  | 0.44  | 0.42      |      |  | -5.04 | 2.12E-005 | Down | -2.84 | ##### | Down | Expressed protein                                                             |     |
| Pc_TC104794 | 1.87  | 0     | Up   |  | 0     | 3.28E-008 |      |  | 1.8   | 0.08      |      | 0.04  | 0.97  |      | Expressed protein                                                             |     |
| Pc_TC104796 | 0.42  | 0.24  |      |  | 0.55  | 0.22      |      |  | -4.11 | 6.33E-005 | Down | -1.89 | 0     | Down | highly ABA-induced PP2C gene 3                                                |     |
| Pc_TC104798 | -2.24 | 0.23  |      |  | 0.06  | 1         |      |  | 2.29  | 0.09      |      | 2.26  | 0.03  | Up   | Expressed protein                                                             |     |
| Pc_TC104823 | -3.17 | 0.04  | Down |  | -0.1  | 0.98      |      |  | 0.65  | 0.64      |      | 0.8   | 0.43  |      | Expressed protein                                                             |     |
| Pc_TC104827 | 0.29  | 0.47  |      |  | 0.01  | 0.98      |      |  | -3.67 | 0         | Down | -1.47 | 0.01  | Down | Expressed protein                                                             |     |
| Pc_TC104834 | 0.73  | 0.43  |      |  | 0.42  | 0.72      |      |  | 1.6   | 0.2       |      | 2.04  | 0.02  | Up   | Expressed protein                                                             |     |
| Pc_TC104850 | 0.36  | 0.58  |      |  | 0.35  | 0.64      |      |  | -3.3  | 0.01      | Down | -2.77 | 0     | Down | Expressed protein                                                             |     |
| Pc_TC104859 | 0.08  | 1     |      |  | 1.95  | 0.08      |      |  | 2.33  | 0.09      |      | 2.28  | 0.03  | Up   | Expressed protein                                                             |     |
| Pc_TC104860 | -1.96 | 0.01  | Down |  | -2.06 | 0.02      | Down |  | 1.12  | 0.3       |      | -1.27 | 0.13  |      | Expressed protein                                                             |     |
| Pc_TC104861 | -0.7  | 0.44  |      |  | -2.79 | 0.02      | Down |  | 1.9   | 0.1       |      | 1.91  | 0.02  | Up   | Expressed protein                                                             |     |
| Pc_TC104869 | 0.77  | 0.43  |      |  | -0.3  | 0.85      |      |  | -2.08 | 0.21      |      | -3.54 | 0.03  | Down | Expressed protein                                                             |     |
| Pc_TC104876 | -0.29 | 0.75  |      |  | -0.22 | 0.84      |      |  | -3.01 | 0.04      | Down | -0.02 | 1     |      | Expressed protein                                                             |     |
| Pc_TC104918 | -0.18 | 0.83  |      |  | -0.27 | 0.77      |      |  | -0.83 | 0.5       |      | -2.43 | 0.01  | Down | Expressed protein                                                             |     |
| Pc_TC104922 | 1.99  | 0.02  | Up   |  | 2.99  | 0         | Up   |  | -1.88 | 0.31      |      | 1.97  | 0.05  | Up   | Expressed protein                                                             |     |
| Pc_TC104925 | 0.43  | 0.61  |      |  | -0.53 | 0.62      |      |  | 1.37  | 0.24      |      | 1.94  | 0.02  | Up   | Expressed protein                                                             |     |
| Pc_TC104933 | -0.28 | 0.94  |      |  | 3.36  | 0         | Up   |  | -0.08 | 1         |      | 2.65  | 0.01  | Up   | Expressed protein                                                             |     |
| Pc_TC104934 | 0.73  | 0.34  |      |  | 2.29  | 0         | Up   |  | 0     | 0         |      | -2.58 | 0.02  | Down | Expressed protein                                                             |     |
| Pc_TC104938 | -0.76 | 0.47  |      |  | 0.17  | 0.91      |      |  | -2.82 | 0.08      |      | -5.02 | 0     | Down | Expressed protein                                                             |     |
| Pc_TC104941 | 0.11  | 0.88  |      |  | -0.94 | 0.25      |      |  | 0     | 1.59E-005 |      | -3.03 | 0     | Down | wall-associated kinase 2                                                      |     |
| Pc_TC104942 | -2    | ##### | Down |  | -0.6  | 0.28      |      |  | 0.98  | 0.28      |      | 0.05  | 0.94  |      | NAC (No Apical Meristem) domain transcriptional regulator superfamily protein | NAC |
| Pc_TC104948 | -0.1  | 0.9   |      |  | 0.72  | 0.32      |      |  | -2.94 | 0.02      | Down | -1.36 | 0.1   |      | Expressed protein                                                             |     |

|             |       |       |      |       |           |      |       |           |       |       |      |                                                 |       |
|-------------|-------|-------|------|-------|-----------|------|-------|-----------|-------|-------|------|-------------------------------------------------|-------|
| Pc_TC104951 | -3.24 | 0.03  | Down | 0.2   | 0.9       |      | 1.59  | 0.2       | 0.3   | 0.8   |      | Expressed protein                               |       |
| Pc_TC104959 | -2.4  | 0     | Down | -0.79 | 0.31      |      | 0.9   | 0.39      | 0.04  | 0.97  |      | Expressed protein                               |       |
| Pc_TC104961 | 1.72  | 0.1   |      | 1.41  | 0.25      |      | 2.46  | 0.07      | 2.61  | 0.01  | Up   | Expressed protein                               |       |
| Pc_TC104965 | 1.02  | 0.22  |      | 2.23  | 0.01      | Up   | -2.27 | 0.14      | -2.64 | 0.04  | Down | Expressed protein                               |       |
| Pc_TC104992 | 1.25  | 0.17  |      | -0.36 | 0.83      |      | 2.65  | 0.03      | 3.1   | 0     | Up   | Expressed protein                               |       |
| Pc_TC104993 | 0.49  | 0.21  |      | 0.25  | 0.62      |      | -2.26 | 0.02      | 0.43  | 0.45  |      | Expressed protein                               |       |
| Pc_TC104997 | -0.01 | 1     |      | 0.85  | 0.29      |      | -0.07 | 0.97      | -1.91 | 0.05  | Down | Putative uncharacterized protein                |       |
| Pc_TC105017 | -1.85 | 0.05  | Down | -2.53 | 0.03      | Down | 0.77  | 0.51      | -0.86 | 0.37  |      | Expressed protein                               |       |
| Pc_TC105019 | -0.49 | 0.6   |      | -0.03 | 1         |      | -3.58 | 0.02      | -1.76 | 0.1   |      | Expressed protein                               |       |
| Pc_TC105028 | 0.69  | 0.37  |      | 0.75  | 0.4       |      | 1.03  | 0.38      | 2.06  | 0.01  | Up   | putative CACTA,En/Spm sub-class                 |       |
| Pc_TC105032 | -0.21 | 0.79  |      | -2.55 | 0.01      | Down | 1.12  | 0.31      | -0.63 | 0.46  |      | putative CACTA,En/Spm sub-class                 |       |
| Pc_TC105034 | 0.22  | 0.73  |      | -2.34 | 0.01      | Down | 1.11  | 0.29      | 0.84  | 0.24  |      | Expressed protein                               |       |
| Pc_TC105051 | -0.02 | 1     |      | -1.41 | 0.15      |      | -1.88 | 0.15      | -2.02 | 0.04  | Down | Expressed protein                               |       |
| Pc_TC105052 | 1.42  | 0.12  |      | 1.96  | 0.04      | Up   | -0.5  | 0.78      | 1.21  | 0.24  |      | Expressed protein                               |       |
| Pc_TC105053 | 2.2   | 0     | Up   | 1.44  | 0.08      |      | -0.38 | 0.78      | 1.22  | 0.14  |      | Expressed protein                               |       |
| Pc_TC105054 | 0.8   | 0.18  |      | 1.17  | 0.09      |      | -2.56 | 0.04      | 0.27  | 0.72  |      | Expressed protein                               |       |
| Pc_TC105058 | 1.08  | 0.19  |      | 1.85  | 0.03      | Up   | -2.5  | 0.11      | -0.26 | 0.84  |      | Expressed protein                               |       |
| Pc_TC105071 | -2.86 | 0.03  | Down | -0.88 | 0.47      |      | 0.71  | 0.59      | -0.99 | 0.39  |      | Putative uncharacterized protein Sb02g041490    |       |
| Pc_TC105072 | -1.86 | 0.03  | Down | 0.27  | 0.76      |      | -1.82 | 0.16      | -0.97 | 0.29  |      | Putative uncharacterized protein Sb02g041490    |       |
| Pc_TC105076 | 0.15  | 0.88  |      | -0.16 | 0.88      |      | 2.19  | 0.05      | 1.28  | 0.11  |      | Expressed protein                               |       |
| Pc_TC105085 | 0.42  | 0.63  |      | 1.06  | 0.23      |      | -2.4  | 0.11      | -2.28 | 0.05  | Down | Expressed protein                               |       |
| Pc_TC105086 | -2.8  | 0.04  | Down | -0.82 | 0.51      |      | -0.2  | 0.91      | -1.66 | 0.17  |      | Expressed protein                               |       |
| Pc_TC105104 | 0.44  | 0.56  |      | 0.52  | 0.55      |      | -1.53 | 0.24      | -2.06 | 0.04  | Down | Expressed protein                               |       |
| Pc_TC105119 | 0.2   | 0.74  |      | 0.31  | 0.66      |      | -2.73 | 0.02      | -0.98 | 0.19  |      | Expressed protein                               |       |
| Pc_TC105124 | 0.84  | 0.31  |      | 0.97  | 0.3       |      | -1.39 | 0.34      | -2.49 | 0.04  | Down | Expressed protein                               |       |
| Pc_TC105125 | 0.12  | 0.92  |      | 1.48  | 0.07      |      | -2.12 | 0.13      | -2.12 | 0.05  | Down | Expressed protein                               |       |
| Pc_TC105126 | -0.27 | 0.79  |      | -2.66 | 0.03      | Down | -0.15 | 0.93      | -0.06 | 0.98  |      | Expressed protein                               |       |
| Pc_TC105128 | 0.41  | 0.32  |      | 0.42  | 0.41      |      | -4.62 | 4.09E-005 | -2.71 | ##### | Down | Expressed protein                               |       |
| Pc_TC105132 | -2.46 | 0.01  | Down | -1.1  | 0.23      |      | -0.07 | 0.97      | -1.15 | 0.2   |      | Expressed protein                               |       |
| Pc_TC105134 | -0.69 | 0.42  |      | 0.22  | 0.82      |      | -3.05 | 0.04      | -1.27 | 0.19  |      | Expressed protein                               |       |
| Pc_TC105143 | 0.01  | 1     |      | -0.08 | 0.99      |      | -1.79 | 0.25      | -2.83 | 0.04  | Down | Expressed protein                               |       |
| Pc_TC105146 | 0.25  | 0.63  |      | 0.34  | 0.58      |      | -1.8  | 0.09      | -1.52 | 0.03  | Down | Expressed protein                               |       |
| Pc_TC105155 | -3.45 | 0.02  | Down | -3.47 | 0.03      | Down | 0.23  | 0.89      | -0.9  | 0.43  |      | Expressed protein                               |       |
| Pc_TC105161 | -1.27 | 0.1   |      | -3.99 | 0         | Down | -2.45 | 0.06      | -2.83 | 0     | Down | cytochrome c oxidase subunit 3                  |       |
| Pc_TC105166 | -0.25 | 0.76  |      | 0.06  | 0.97      |      | -2    | 0.12      | -1.96 | 0.04  | Down | Expressed protein                               |       |
| Pc_TC105168 | 2.33  | 0.02  | Up   | 1.7   | 0.17      |      | 2.23  | 0.12      | 2.83  | 0.01  | Up   | Expressed protein                               |       |
| Pc_TC105185 | 0.08  | 0.99  |      | 1.02  | 0.31      |      | -3.82 | 0.04      | -0.89 | 0.46  |      | Expressed protein                               |       |
| Pc_TC105212 | 0.24  | 0.67  |      | 0.52  | 0.42      |      | -3.22 | 0.01      | -2.52 | 0     | Down | Uncharacterized protein                         |       |
| Pc_TC105216 | 0.58  | 0.33  |      | 1.07  | 0.11      |      | -3.12 | 0.01      | -1.11 | 0.16  |      | Expressed protein                               |       |
| Pc_TC105240 | -1.99 | 0.04  | Down | -0.53 | 0.59      |      | -0.25 | 0.86      | -0.6  | 0.53  |      | Expressed protein                               |       |
| Pc_TC105247 | -0.08 | 0.94  |      | 1.29  | 0.07      |      | -3.15 | 0.02      | -2.9  | 0     | Down | Expressed protein                               |       |
| Pc_TC105255 | -0.22 | 0.74  |      | -1.7  | 0.04      | Down | -0.15 | 0.89      | 0.38  | 0.61  |      | Expressed protein                               |       |
| Pc_TC105261 | -1.73 | 0.11  |      | -2.75 | 0.04      | Down | 0.87  | 0.49      | -0.6  | 0.58  |      | structural molecules                            |       |
| Pc_TC105263 | -1.53 | 0.04  | Down | -0.1  | 0.91      |      | -0.09 | 0.95      | -0.47 | 0.56  |      | Expressed protein                               |       |
| Pc_TC105270 | 0.68  | 0.45  |      | -0.3  | 0.83      |      | 1.89  | 0.12      | 1.91  | 0.03  | Up   | Expressed protein                               |       |
| Pc_TC105276 | -0.4  | 0.4   |      | -1.2  | 0.05      | Down | 1.41  | 0.13      | 0.56  | 0.34  |      | Expressed protein                               |       |
| Pc_TC105279 | 2.37  | 0     | Up   | 0     | 0.01      |      | 3.35  | 0         | 0.16  | 0.92  |      | Expressed protein                               |       |
| Pc_TC105285 | 1.75  | 0.02  | Up   | 0     | 0         |      | 1.34  | 0.27      | -0.49 | 0.66  |      | Expressed protein                               |       |
| Pc_TC105294 | -0.43 | 0.5   |      | -1.73 | 0.03      | Down | -0.05 | 0.97      | -0.43 | 0.57  |      | Expressed protein                               |       |
| Pc_TC105312 | 5.08  | ##### | Up   | 0     | 0.15      |      | 3.4   | 0.01      | 3.57  | 0     | Up   | Transducin/WD40 repeat-like superfamily protein |       |
| Pc_TC105313 | 1.08  | 0.01  | Up   | 0     | 9.89E-015 |      | 0.92  | 0.33      | -1.26 | 0.06  |      | receptor for activated C kinase 1B              |       |
| Pc_TC105316 | -3.17 | 0.04  | Down | -0.87 | 0.51      |      | -1.57 | 0.32      | -2.62 | 0.06  |      | Expressed protein                               |       |
| Pc_TC105319 | -2.35 | 0.02  | Down | -0.67 | 0.49      |      | -0.14 | 0.92      | 0.08  | 0.95  |      | Expressed protein                               |       |
| Pc_TC105320 | -0.7  | 0.37  |      | 0.08  | 0.94      |      | -3.47 | 0.01      | -1.57 | 0.09  |      | Expressed protein                               |       |
| Pc_TC105330 | -0.7  | 0.28  |      | -0.72 | 0.34      |      | -2.11 | 0.07      | -2.3  | 0.01  | Down | Expressed protein                               |       |
| Pc_TC105337 | 0     | 0     |      | -3.9  | 0.01      | Down | -1.54 | 0.27      | -4.33 | 0     | Down | gamma histone variant H2AX                      | CCAAT |
| Pc_TC105348 | 1.69  | 0.05  | Up   | 0     | 0.02      |      | 2.4   | 0.05      | 1.21  | 0.23  |      | Expressed protein                               |       |
| Pc_TC105349 | -4.09 | 0.02  | Down | -0.94 | 0.49      |      | 1.83  | 0.15      | -0.74 | 0.56  |      | Expressed protein                               |       |
| Pc_TC105350 | 0.28  | 0.55  |      | 0.87  | 0.12      |      | -5.32 | 1.80E-005 | -3.58 | ##### | Down | Expressed protein                               |       |
| Pc_TC105355 | 0.2   | 0.82  |      | -0.07 | 0.96      |      | -5.05 | 0         | -2.12 | 0.03  | Down | Expressed protein                               |       |
| Pc_TC105356 | 0.37  | 0.4   |      | 0.48  | 0.38      |      | -5.04 | 2.33E-005 | -3.41 | ##### | Down | Expressed protein                               |       |
| Pc_TC105358 | -1.09 | 0.55  |      | 1.35  | 0.28      |      | 3.44  | 0.01      | 2.29  | 0.03  | Up   | Expressed protein                               |       |

|             |       |       |      |       |           |      |       |           |      |       |       |      |                                                            |      |
|-------------|-------|-------|------|-------|-----------|------|-------|-----------|------|-------|-------|------|------------------------------------------------------------|------|
| Pc_TC105361 | 0.65  | 0.44  |      | 1.89  | 0.02      | Up   | -2.03 | 0.16      |      | -0.28 | 0.81  |      | Expressed protein                                          |      |
| Pc_TC105387 | -2.29 | 0.04  | Down | -1.57 | 0.17      |      | -2.87 | 0.06      |      | -1.52 | 0.16  |      | Uncharacterized protein                                    |      |
| Pc_TC105393 | 0.18  | 0.64  |      | 0.26  | 0.6       |      | -3.49 | 0         | Down | -1.82 | 0     | Down | Uncharacterized protein                                    |      |
| Pc_TC105429 | 0.03  | 0.92  |      | 0.5   | 0.24      |      | -3.46 | 0         | Down | -1.98 | 0     | Down | Expressed protein                                          |      |
| Pc_TC105437 | 1.02  | 0.21  |      | 2.7   | 0         | Up   | 0.26  | 0.86      |      | 1.42  | 0.11  |      | Expressed protein                                          |      |
| Pc_TC105449 | 0.3   | 0.81  |      | -0.65 | 0.64      |      | 3.19  | 0.01      | Up   | 2.35  | 0.01  | Up   | Uncharacterized protein                                    |      |
| Pc_TC105456 | 0.5   | 0.44  |      | 1.46  | 0.04      | Up   | -1.96 | 0.11      |      | -0.94 | 0.25  |      | Expressed protein                                          |      |
| Pc_TC105457 | 0.53  | 0.36  |      | -0.83 | 0.27      |      | 1.54  | 0.13      |      | 2     | 0     | Up   | Expressed protein                                          |      |
| Pc_TC105461 | 1.2   | 0.26  |      | 2.38  | 0.02      | Up   | -0.96 | 0.62      |      | -0.25 | 0.92  |      | Reverse transcriptase (RNA-dependent DNA polymerase)       |      |
| Pc_TC105476 | -0.01 | 1     |      | 1.18  | 0.13      |      | -3.56 | 0.01      | Down | -6.02 | ##### | Down | Expressed protein                                          |      |
| Pc_TC105488 | -3.78 | 0.01  | Down | -2.8  | 0.03      | Down | 3.15  | 0.01      | Up   | 1.05  | 0.23  |      | Expressed protein                                          |      |
| Pc_TC105501 | -0.06 | 1     |      | 0.06  | 1         |      | -2.37 | 0.14      |      | -3.83 | 0.01  | Down | Expressed protein                                          |      |
| Pc_TC105507 | -0.87 | 0.28  |      | -3.37 | 0         | Down | 0.9   | 0.43      |      | -0.18 | 0.85  |      | Expressed protein                                          |      |
| Pc_TC105511 | -1.29 | 0.11  |      | -2.45 | 0.02      | Down | -0.74 | 0.54      |      | -0.23 | 0.8   |      | Expressed protein                                          |      |
| Pc_TC105522 | -1.63 | 0.04  | Down | -1.2  | 0.16      |      | -4.08 | 0         | Down | -3.54 | 0     | Down | light harvesting complex of photosystem II 5               |      |
| Pc_TC105532 | -0.66 | 0.43  |      | 0.72  | 0.39      |      | 1.06  | 0.36      |      | 1.53  | 0.05  | Up   | zinc finger (C3HC4-type RING finger) family protein        |      |
| Pc_TC105536 | 1.63  | 0     | Up   | 0     | 4.35E-008 |      | 1.26  | 0.22      |      | -0.86 | 0.26  |      | Expressed protein                                          | bZIP |
| Pc_TC105543 | 0.52  | 0.51  |      | 1.64  | 0.04      | Up   | -3.67 | 0.02      | Down | -1.02 | 0.31  |      | Expressed protein                                          |      |
| Pc_TC105556 | 0.39  | 0.67  |      | -2.8  | 0.03      | Down | 0.75  | 0.55      |      | 1.24  | 0.15  |      | Expressed protein                                          |      |
| Pc_TC105563 | 1.84  | 0     | Up   | 0     | 3.51E-005 |      | 1.37  | 0.22      |      | 0.47  | 0.57  |      | Expressed protein                                          |      |
| Pc_TC105584 | -0.3  | 0.74  |      | -2.91 | 0.02      | Down | -0.39 | 0.77      |      | -0.02 | 1     |      | Expressed protein                                          |      |
| Pc_TC105588 | 0.75  | 0.19  |      | 0.59  | 0.39      |      | 0.84  | 0.42      |      | 1.55  | 0.02  | Up   | Expressed protein                                          |      |
| Pc_TC105596 | 2.33  | 0.02  | Up   | 2.99  | 0         | Up   | -3.5  | 0.19      |      | -0.2  | 0.98  |      | Uncharacterized protein (Fragment)                         |      |
| Pc_TC105603 | -0.44 | 0.29  |      | -2.52 | 1.80E-005 | Down | 2.08  | 0.02      | Up   | 1.53  | 0     | Up   | Leucine-rich repeat protein kinase family protein          |      |
| Pc_TC105633 | -1.2  | 0.15  |      | 1.75  | 0.02      | Up   | -2.26 | 0.09      |      | -1.35 | 0.15  |      | Expressed protein                                          |      |
| Pc_TC105637 | -3.45 | 0.02  | Down | -3.47 | 0.03      | Down | 0.59  | 0.66      |      | 0.19  | 0.89  |      | Expressed protein                                          |      |
| Pc_TC105649 | -0.52 | 0.39  |      | -0.66 | 0.35      |      | 2.01  | 0.04      | Up   | 0.88  | 0.19  |      | Expressed protein                                          |      |
| Pc_TC105661 | -0.39 | 0.7   |      | -2.8  | 0.03      | Down | 1.84  | 0.12      |      | 0.6   | 0.52  |      | Expressed protein                                          |      |
| Pc_TC105671 | 0.33  | 0.67  |      | 0.23  | 0.81      |      | -4.47 | 0         | Down | -1.54 | 0.11  |      | Expressed protein                                          |      |
| Pc_TC105673 | 0.1   | 0.91  |      | 1.16  | 0.13      |      | -5.3  | 0         | Down | -1.93 | 0.04  | Down | citrate synthase 5                                         |      |
| Pc_TC105693 | 0.18  | 0.81  |      | 0.01  | 1         |      | -3.56 | 0.01      | Down | -0.19 | 0.83  |      | Expressed protein                                          |      |
| Pc_TC105700 | -0.34 | 0.8   |      | 0.38  | 0.76      |      | -2.82 | 0.1       |      | -3.7  | 0.02  | Down | Expressed protein                                          |      |
| Pc_TC105704 | 0.42  | 0.62  |      | 1.43  | 0.08      |      | -3.58 | 0.02      | Down | -2.14 | 0.05  |      | Expressed protein                                          |      |
| Pc_TC105706 | 0.22  | 0.67  |      | 0.8   | 0.18      |      | -3.77 | 0         | Down | -1.87 | 0.01  | Down | Expressed protein                                          |      |
| Pc_TC105731 | 0.46  | 0.5   |      | 0.33  | 0.68      |      | -2.56 | 0.05      | Down | -2.12 | 0.02  | Down | Expressed protein                                          |      |
| Pc_TC105744 | 0.01  | 1     |      | -0.65 | 0.5       |      | -3.96 | 0.01      | Down | -2.03 | 0.05  | Down | Expressed protein                                          |      |
| Pc_TC105748 | 0.93  | 0.18  |      | 1.82  | 0.01      | Up   | -2.33 | 0.08      |      | -1.06 | 0.25  |      | Expressed protein                                          |      |
| Pc_TC105755 | 2.29  | 0     | Up   | 0     | 0         |      | 2.37  | 0.05      | Up   | -0.66 | 0.57  |      | GLU-ADT subunit B                                          |      |
| Pc_TC105763 | 2.09  | 0     | Up   | 0     | 2.92E-007 |      | 1.87  | 0.07      |      | 0.17  | 0.83  |      | Ribosomal L22e protein family                              |      |
| Pc_TC105772 | 0.15  | 0.78  |      | 0.62  | 0.32      |      | -1.71 | 0.11      |      | -1.78 | 0.01  | Down | Expressed protein                                          |      |
| Pc_TC105778 | -1.51 | 0.04  | Down | -1.2  | 0.14      |      | 0.53  | 0.63      |      | 0.17  | 0.83  |      | Expressed protein                                          |      |
| Pc_TC105779 | 0.56  | 0.16  |      | 0.47  | 0.35      |      | -7.14 | 3.61E-008 | Down | -4.37 | ##### | Down | Expressed protein                                          |      |
| Pc_TC105781 | -0.48 | 0.45  |      | -0.41 | 0.58      |      | -1.36 | 0.22      |      | -1.79 | 0.03  | Down | Expressed protein                                          |      |
| Pc_TC105797 | 0.02  | 1     |      | -1.17 | 0.23      |      | 2.25  | 0.04      | Up   | 1.41  | 0.07  |      | Expressed protein                                          |      |
| Pc_TC105798 | 0.1   | 0.83  |      | 0.08  | 0.9       |      | -2.85 | 0.01      | Down | -2.58 | 0     | Down | Expressed protein                                          |      |
| Pc_TC105799 | 0.62  | 0.43  |      | 0.45  | 0.63      |      | -3.3  | 0.03      | Down | -1.04 | 0.3   |      | Expressed protein                                          |      |
| Pc_TC105806 | 1.08  | 0.77  |      | 3.52  | 0.03      | Up   | 1.09  | 0.77      |      | 0.63  | 0.96  |      | Expressed protein                                          |      |
| Pc_TC105817 | 0.33  | 0.39  |      | 0.7   | 0.14      |      | -3.85 | 0         | Down | -1.35 | 0.02  | Down | Expressed protein                                          |      |
| Pc_TC105820 | -0.56 | 0.4   |      | -0.13 | 0.87      |      | -2.44 | 0.04      | Down | -1.1  | 0.16  |      | Uncharacterized protein                                    |      |
| Pc_TC105832 | -0.07 | 0.96  |      | -0.57 | 0.54      |      | 2.51  | 0.02      | Up   | 1.24  | 0.11  |      | aconitase 1                                                |      |
| Pc_TC105838 | 4.4   | 0     | Up   | 0     | 0.67      |      | 2.67  | 0.2       |      | -0.37 | 1     |      | Expressed protein                                          |      |
| Pc_TC105840 | 0.62  | 0.33  |      | -0.42 | 0.61      |      | -3.38 | 0.01      | Down | -2.26 | 0.01  | Down | Expressed protein                                          |      |
| Pc_TC105852 | -4.09 | 0     | Down | -2    | 0.04      | Down | -3.25 | 0.02      | Down | -2.13 | 0.03  | Down | light-harvesting chlorophyll-protein complex II subunit B1 |      |
| Pc_TC105854 | 1.5   | 0.09  |      | -3.94 | 0.05      | Down | 1     | 0.47      |      | 1.33  | 0.18  |      | Expressed protein                                          |      |
| Pc_TC105872 | 0.4   | 0.44  |      | 0.64  | 0.3       |      | -2.87 | 0.01      | Down | 0.21  | 0.75  |      | Expressed protein                                          |      |
| Pc_TC105876 | 1.1   | 0.14  |      | 1.68  | 0.04      | Up   | -1.3  | 0.33      |      | -0.22 | 0.84  |      | gag protein                                                |      |
| Pc_TC105895 | -1.21 | 0.12  |      | -1.12 | 0.21      |      | -1.43 | 0.24      |      | -1.85 | 0.04  | Down | Uncharacterized protein                                    |      |
| Pc_TC105907 | 0.09  | 0.89  |      | 0.66  | 0.3       |      | -5.28 | 9.83E-005 | Down | -4.57 | ##### | Down | Expressed protein                                          |      |
| Pc_TC105908 | 0.79  | 0.21  |      | 0.84  | 0.25      |      | 0     | 3.05E-005 |      | -1.89 | 0.03  | Down | Expressed protein                                          |      |
| Pc_TC105910 | 2.39  | ##### | Up   | 0     | 2.64E-005 |      | 2.21  | 0.04      | Up   | 0.35  | 0.68  |      | Zinc-binding ribosomal protein family protein              |      |
| Pc_TC105915 | -0.1  | 0.9   |      | -2.29 | 0.01      | Down | 1.14  | 0.28      |      | 0.84  | 0.24  |      | Expressed protein                                          |      |
| Pc_TC105923 | 0.15  | 0.73  |      | -0.08 | 0.88      |      | -2.79 | 0.01      | Down | -1.67 | 0.01  | Down | Expressed protein                                          |      |



|             |       |       |      |  |       |           |      |       |           |      |       |       |      |                                                             |
|-------------|-------|-------|------|--|-------|-----------|------|-------|-----------|------|-------|-------|------|-------------------------------------------------------------|
| Pc_TC105924 | 1.63  | 0.02  | Up   |  | 0     | 0         |      | 0.89  | 0.45      |      | -1.08 | 0.27  |      | 3-hydroxyacyl-CoA dehydrogenase family protein              |
| Pc_TC105942 | 1.83  | 0.06  |      |  | 2.12  | 0.04      | Up   | 0.21  | 0.94      |      | -0.66 | 0.69  |      | Expressed protein                                           |
| Pc_TC105943 | -0.01 | 0.99  |      |  | 0.21  | 0.75      |      | -1.14 | 0.28      |      | -1.44 | 0.04  | Down | Expressed protein                                           |
| Pc_TC105957 | 0.23  | 0.83  |      |  | 0.64  | 0.51      |      | -3.3  | 0.04      | Down | -0.72 | 0.5   |      | Moesin                                                      |
| Pc_TC105958 | 2.15  | 0.01  | Up   |  | 0     | 0.02      |      | 1.22  | 0.38      |      | -0.86 | 0.54  |      | Expressed protein                                           |
| Pc_TC105961 | 4.38  | ##### | Up   |  | 0     | 0.02      |      | 4.96  | 3.94E-005 | Up   | 2.14  | 0.02  | Up   | Expressed protein                                           |
| Pc_TC105976 | 0     | 0     |      |  | 0     | 0.01      |      | -3.3  | 0.06      |      | -3.18 | 0.03  | Down | Expressed protein                                           |
| Pc_TC105978 | 0.64  | 0.34  |      |  | 1.21  | 0.1       |      | -3.43 | 0.01      | Down | -2.31 | 0.02  | Down | Expressed protein                                           |
| Pc_TC105980 | 1.12  | 0.14  |      |  | 1.06  | 0.23      |      | -1.28 | 0.35      |      | 1.65  | 0.05  | Up   | Expressed protein                                           |
| Pc_TC105983 | 1.19  | 0.13  |      |  | -4.64 | 0.01      | Down | 0.58  | 0.66      |      | -1.49 | 0.19  |      | general regulatory factor 12                                |
| Pc_TC106005 | -0.01 | 0.99  |      |  | 0.06  | 0.93      |      | -2.04 | 0.06      |      | -3.11 | ##### | Down | pleckstrin homology (PH) domain-containing protein          |
| Pc_TC106006 | -0.14 | 0.79  |      |  | 0.82  | 0.16      |      | -2.91 | 0.01      | Down | -3.14 | ##### | Down | pleckstrin homology (PH) domain-containing protein          |
| Pc_TC106008 | 0.23  | 0.69  |      |  | 1.74  | 0         | Up   | -2.71 | 0.02      | Down | 0.72  | 0.29  |      | pleckstrin homology (PH) domain-containing protein          |
| Pc_TC106020 | 0.13  | 0.74  |      |  | 0.52  | 0.27      |      | -4.98 | 6.10E-006 | Down | -3.11 | ##### | Down | Expressed protein                                           |
| Pc_TC106024 | -0.04 | 1     |      |  | -0.06 | 1         |      | -3.14 | 0.06      |      | -2.7  | 0.04  | Down | transducin family protein / WD-40 repeat family protein     |
| Pc_TC106025 | 4.33  | 0.01  | Up   |  | 3.52  | 0.11      |      | 3.31  | 0.19      |      | 2.43  | 0.39  |      | transducin family protein / WD-40 repeat family protein     |
| Pc_TC106051 | -1.9  | 0.02  | Down |  | -4.01 | 0         | Down | 0.97  | 0.38      |      | -0.07 | 0.95  |      | Expressed protein                                           |
| Pc_TC106059 | 0.59  | 0.74  |      |  | 2.74  | 0.01      | Up   | 2.19  | 0.14      |      | 1.52  | 0.23  |      | Expressed protein                                           |
| Pc_TC106075 | -0.11 | 0.9   |      |  | -0.16 | 0.87      |      | -2.71 | 0.04      | Down | -1.49 | 0.09  |      | Expressed protein                                           |
| Pc_TC106077 | 1.77  | 0.01  | Up   |  | 0     | 0         |      | 1.54  | 0.19      |      | 0.33  | 0.74  |      | vacuolar ATP synthase subunit C (VATC) / V-ATPase C subunit |
| Pc_TC106080 | 2.14  | 0.01  | Up   |  | 0     | 0.02      |      | 1.53  | 0.24      |      | 0.91  | 0.39  |      | Amino acid dehydrogenase family protein                     |
| Pc_TC106083 | -0.28 | 0.75  |      |  | 0.37  | 0.68      |      | -6.02 | 0         | Down | -2.09 | 0.04  | Down | Expressed protein                                           |
| Pc_TC106100 | 0.71  | 0.31  |      |  | 0.49  | 0.57      |      | -2.94 | 0.03      | Down | -1.9  | 0.05  |      | Expressed protein                                           |
| Pc_TC106110 | -2.34 | ##### | Down |  | -0.92 | 0.15      |      | 0.19  | 0.85      |      | 0.14  | 0.83  |      | cellular apoptosis susceptibility protein                   |
| Pc_TC106111 | -1.58 | 0     | Down |  | 0.48  | 0.41      |      | -0.47 | 0.63      |      | -2.09 | 0     | Down | cellular apoptosis susceptibility protein                   |
| Pc_TC106131 | 1.53  | 0.13  |      |  | -0.4  | 0.85      |      | 1.4   | 0.33      |      | 2.17  | 0.03  | Up   | Expressed protein                                           |
| Pc_TC106133 | 1.67  | 0.01  | Up   |  | 0     | 0         |      | 0.34  | 0.79      |      | -0.72 | 0.45  |      | Expressed protein                                           |
| Pc_TC106134 | 0.32  | 0.72  |      |  | 0.71  | 0.43      |      | -4.54 | 0.01      | Down | -1.96 | 0.07  |      | Expressed protein                                           |
| Pc_TC106135 | 0.6   | 0.57  |      |  | -1.62 | 0.28      |      | -3.5  | 0.08      |      | -4.37 | 0.02  | Down | Expressed protein                                           |
| Pc_TC106146 | 0.02  | 1     |      |  | 0.76  | 0.44      |      | -5.08 | 0.01      | Down | -2.37 | 0.06  |      | Expressed protein                                           |
| Pc_TC106153 | 0.45  | 0.43  |      |  | 0.89  | 0.17      |      | -3.21 | 0.01      | Down | -2.02 | 0.01  | Down | Putative uncharacterized protein                            |
| Pc_TC106154 | -5.45 | ##### | Down |  | -0.82 | 0.39      |      | -1.38 | 0.28      |      | -2.73 | 0.01  | Down | Expressed protein                                           |
| Pc_TC106158 | -0.81 | 0.43  |      |  | 0.53  | 0.61      |      | -1.61 | 0.27      |      | -3.08 | 0.02  | Down | Transposable element protein putative RNaseH                |
| Pc_TC106169 | 2.14  | 0.02  | Up   |  | 1.17  | 0.31      |      | 1.96  | 0.14      |      | 0.43  | 0.76  |      | Uncharacterized protein                                     |
| Pc_TC106178 | -0.72 | 0.41  |      |  | 1.54  | 0.05      |      | 2.92  | 0.01      | Up   | 0.28  | 0.77  |      | Expressed protein                                           |
| Pc_TC106179 | 2.62  | 0     | Up   |  | 3.34  | 0         | Up   | 4.73  | 0         | Up   | 3.28  | 0     | Up   | Expressed protein                                           |
| Pc_TC106181 | 0.93  | 0.09  |      |  | 0.81  | 0.22      |      | 1.06  | 0.3       |      | 1.39  | 0.04  | Up   | Expressed protein                                           |
| Pc_TC106182 | -4.24 | ##### | Down |  | -3.97 | 3.44E-008 | Down | -3.36 | 0         | Down | -1.97 | 0     | Down | Expressed protein                                           |
| Pc_TC106191 | -1.39 | 0.14  |      |  | -0.65 | 0.53      |      | 1.1   | 0.35      |      | 2.03  | 0.01  | Up   | Putative uncharacterized protein Sb06g001660                |
| Pc_TC106194 | -0.17 | 0.72  |      |  | -1.35 | 0.03      | Down | 0.05  | 0.96      |      | -0.29 | 0.64  |      | Putative uncharacterized protein Sb06g001660                |
| Pc_TC106196 | -1.07 | 0.01  | Down |  | -0.91 | 0.07      |      | 1     | 0.25      |      | -0.17 | 0.76  |      | Expressed protein                                           |
| Pc_TC106197 | 0.33  | 0.8   |      |  | 1.76  | 0.07      |      | -3.5  | 0.08      |      | -4.37 | 0.02  | Down | Expressed protein                                           |
| Pc_TC106206 | 0.63  | 0.12  |      |  | 0.7   | 0.17      |      | -2.12 | 0.03      | Down | -0.58 | 0.33  |      | Expressed protein                                           |
| Pc_TC106218 | -1.33 | 0.11  |      |  | -0.72 | 0.43      |      | -2.64 | 0.05      | Down | -2.3  | 0.02  | Down | Expressed protein                                           |
| Pc_TC106219 | -1.41 | 0.06  |      |  | -2.81 | 0         | Down | -1.13 | 0.34      |      | -1.01 | 0.23  |      | Expressed protein                                           |
| Pc_TC106247 | -1.99 | 0.11  |      |  | -1.53 | 0.25      |      | 0.16  | 0.94      |      | -2.77 | 0.04  | Down | Expressed protein                                           |
| Pc_TC106263 | -0.28 | 0.85  |      |  | -0.3  | 0.85      |      | -3.08 | 0.09      |      | -2.96 | 0.05  | Down | Expressed protein                                           |
| Pc_TC106279 | 0.3   | 0.66  |      |  | 0.45  | 0.56      |      | -4.78 | 0         | Down | -3.66 | 0     | Down | Expressed protein                                           |
| Pc_TC106293 | 3.24  | ##### | Up   |  | 0     | 0         |      | 2.21  | 0.05      |      | 1.45  | 0.08  |      | Ubiquinol-cytochrome C reductase iron-sulfur subunit        |
| Pc_TC106296 | 0.74  | 0.39  |      |  | 0.43  | 0.7       |      | -2.08 | 0.18      |      | -2.64 | 0.04  | Down | Uncharacterized protein                                     |
| Pc_TC106298 | 0     | ##### |      |  | -3.08 | 0.01      | Down | 0     | 0         |      | 0     | ##### |      | Expressed protein                                           |
| Pc_TC106300 | 2.14  | 0.02  | Up   |  | 1.6   | 0.14      |      | -0.5  | 0.8       |      | 0.36  | 0.81  |      | Putative uncharacterized protein OSJNBb0061M13.15           |
| Pc_TC106302 | -1.41 | 0.08  |      |  | -2.37 | 0.02      | Down | -1.13 | 0.35      |      | -1.73 | 0.06  |      | Putative uncharacterized protein OSJNBb0061M13.15           |
| Pc_TC106307 | -1.47 | 0.04  | Down |  | -1.15 | 0.16      |      | 0.26  | 0.82      |      | -0.25 | 0.76  |      | ENTH/ANTH/VHS superfamily protein                           |
| Pc_TC106336 | -4.09 | 0.02  | Down |  | -1.3  | 0.35      |      | -3.67 | 0.06      |      | -0.3  | 0.84  |      | Expressed protein                                           |
| Pc_TC106350 | -3.03 | ##### | Down |  | 0.86  | 0.19      |      | -1.9  | 0.09      |      | -3.4  | ##### | Down | Putative uncharacterized protein                            |
| Pc_TC106351 | -3.62 | ##### | Down |  | -2.64 | 0         | Down | -1.3  | 0.26      |      | -2.49 | 0     | Down | Expressed protein                                           |
| Pc_TC106352 | 0     | ##### |      |  | -1.98 | 0.08      |      | -4.71 | 0.01      | Down | -4.58 | 0     | Down | Expressed protein                                           |
| Pc_TC106361 | -0.31 | 0.75  |      |  | 0.88  | 0.32      |      | -3.58 | 0.02      | Down | -2.46 | 0.03  | Down | Expressed protein                                           |
| Pc_TC106367 | 2.59  | ##### | Up   |  | -5.11 | 0         | Down | 2.17  | 0.05      |      | 0.65  | 0.47  |      | tubulin beta-9 chain                                        |
| Pc_TC106370 | 0.32  | 0.72  |      |  | 0.69  | 0.45      |      | -0.84 | 0.53      |      | -2.25 | 0.05  | Down | Expressed protein                                           |
| Pc_TC106371 | 0.06  | 0.95  |      |  | 0.56  | 0.46      |      | -2.71 | 0.03      | Down | -0.12 | 0.89  |      | Expressed protein                                           |

|             |       |       |      |  |       |           |      |       |      |      |       |       |      |                                                         |     |
|-------------|-------|-------|------|--|-------|-----------|------|-------|------|------|-------|-------|------|---------------------------------------------------------|-----|
| Pc_TC106376 | -0.46 | 0.53  |      |  | -2.18 | 0.02      | Down | 0.3   | 0.8  |      | 0.1   | 0.91  |      | Expressed protein                                       |     |
| Pc_TC106400 | -0.18 | 0.92  |      |  | 0.75  | 0.5       |      | -4.67 | 0.03 | Down | -1.09 | 0.39  |      | Expressed protein                                       |     |
| Pc_TC106402 | 0.45  | 0.41  |      |  | 0.34  | 0.61      |      | -3.17 | 0.01 | Down | -1.87 | 0.01  | Down | Expressed protein                                       |     |
| Pc_TC106406 | 0.13  | 0.93  |      |  | -0.45 | 0.7       |      | 0     | 0    |      | -2.54 | 0.04  | Down | Expressed protein                                       |     |
| Pc_TC106419 | 1.6   | 0.15  |      |  | 2.61  | 0.02      | Up   | 1.46  | 0.35 |      | 1.08  | 0.41  |      | Expressed protein                                       |     |
| Pc_TC106457 | 0.74  | 0.04  |      |  | 0.37  | 0.42      |      | 1.07  | 0.21 |      | 1.08  | 0.04  | Up   | Expressed protein                                       |     |
| Pc_TC106458 | -1.17 | 0     | Down |  | -1.15 | 0.01      | Down | -0.32 | 0.71 |      | -0.91 | 0.09  |      | Expressed protein                                       |     |
| Pc_TC106459 | -0.44 | 0.62  |      |  | -0.94 | 0.35      |      | -3.5  | 0.02 | Down | -2    | 0.05  |      | Expressed protein                                       |     |
| Pc_TC106466 | 2.36  | 0.02  | Up   |  | 2.98  | 0.01      | Up   | 0     | 0.11 |      | 0     | 0.08  |      | Expressed protein                                       |     |
| Pc_TC106468 | -2.48 | 0.01  | Down |  | 0.15  | 0.89      |      | -3.05 | 0.03 | Down | 0.88  | 0.28  |      | Tetratricopeptide repeat (TPR)-like superfamily protein |     |
| Pc_TC106487 | 0.29  | 0.51  |      |  | 0.07  | 0.9       |      | 1.48  | 0.11 |      | 1.28  | 0.03  | Up   | Uncharacterized protein                                 |     |
| Pc_TC106496 | 0.52  | 0.51  |      |  | 0.59  | 0.52      |      | -4.67 | 0.01 | Down | -1.22 | 0.23  |      | Expressed protein                                       |     |
| Pc_TC106517 | -3.73 | 0.05  | Down |  | -2.16 | 0.2       |      | 0.65  | 0.67 |      | 0.21  | 0.91  |      | Expressed protein                                       |     |
| Pc_TC106521 | 0.25  | 0.71  |      |  | 1.38  | 0.05      | Up   | -1.86 | 0.12 |      | 0.14  | 0.87  |      | NAC domain containing protein 86                        | NAC |
| Pc_TC106530 | -2.19 | 0.05  | Down |  | -1.48 | 0.2       |      | -0.45 | 0.75 |      | -0.77 | 0.47  |      | cysteine-rich RLK (RECEPTOR-like protein kinase) 8      |     |
| Pc_TC106537 | 0.18  | 0.78  |      |  | 0.56  | 0.42      |      | -3.4  | 0.01 | Down | -3.5  | 0     | Down | Expressed protein                                       |     |
| Pc_TC106543 | -1.64 | 0.16  |      |  | 0.23  | 0.86      |      | -2.7  | 0.1  |      | -2.9  | 0.03  | Down | Expressed protein                                       |     |
| Pc_TC106551 | -1.64 | 0.03  | Down |  | -1.89 | 0.03      | Down | 0.14  | 0.91 |      | -1.76 | 0.04  | Down | Expressed protein                                       |     |
| Pc_TC106554 | 0.22  | 0.74  |      |  | 1.57  | 0.02      | Up   | -0.97 | 0.39 |      | -1.14 | 0.15  |      | ATP synthase alpha/beta family protein                  |     |
| Pc_TC106571 | -0.34 | 0.62  |      |  | 1.07  | 0.12      |      | -2.77 | 0.03 | Down | -2.2  | 0.01  | Down | Expressed protein                                       |     |
| Pc_TC106582 | 4.47  | 0.01  | Up   |  | 2.64  | 0.36      |      | -0.5  | 1    |      | 1.21  | 0.89  |      | Expressed protein                                       |     |
| Pc_TC106585 | 2.31  | 0     | Up   |  | 0.88  | 0.38      |      | 1.66  | 0.18 |      | 2.89  | 0     | Up   | Expressed protein                                       |     |
| Pc_TC106594 | 0.51  | 0.52  |      |  | 0.83  | 0.34      |      | -3.71 | 0.02 | Down | -0.58 | 0.55  |      | Uncharacterized protein                                 |     |
| Pc_TC106595 | -1.3  | 0.01  | Down |  | -0.78 | 0.2       |      | 0.34  | 0.72 |      | -0.08 | 0.9   |      | Uncharacterized protein                                 |     |
| Pc_TC106596 | -1.11 | 0.01  | Down |  | -2.03 | 0         | Down | 1.02  | 0.25 |      | -0.6  | 0.31  |      | Uncharacterized protein                                 |     |
| Pc_TC106602 | 2.08  | 0.54  |      |  | 4.15  | 0.03      | Up   | 0     | 0.87 |      | 0     | 0.9   |      | Ribosomal protein L18e/L15 superfamily protein          |     |
| Pc_TC106615 | 0.24  | 0.66  |      |  | 1.35  | 0.02      | Up   | -1.3  | 0.22 |      | -0.05 | 0.95  |      | Uncharacterized protein                                 |     |
| Pc_TC106616 | -0.2  | 0.69  |      |  | -0.35 | 0.56      |      | -1.39 | 0.17 |      | -1.31 | 0.05  | Down | Expressed protein                                       |     |
| Pc_TC106623 | 0     | ##### |      |  | -5.17 | 3.07E-005 | Down | -3.56 | 0.01 | Down | 0     | ##### |      | rotamase cyclophilin 5                                  |     |
| Pc_TC106628 | 0.27  | 0.6   |      |  | 0.68  | 0.27      |      | -2.15 | 0.05 | Down | -1.39 | 0.05  |      | Expressed protein                                       |     |
| Pc_TC106650 | 3.12  | 0.01  | Up   |  | 0     | 0.36      |      | 2.75  | 0.09 |      | -0.37 | 0.99  |      | aldehyde dehydrogenase 2B4                              |     |
| Pc_TC106661 | -0.44 | 0.5   |      |  | -1.06 | 0.18      |      | 2.04  | 0.05 | Up   | 1.02  | 0.14  |      | Expressed protein                                       |     |
| Pc_TC106663 | 2.04  | 0     | Up   |  | 0     | 2.85E-006 |      | 1.89  | 0.08 |      | 0.22  | 0.8   |      | Putative cuticle protein                                |     |
| Pc_TC106672 | 0.93  | 0.44  |      |  | 0.82  | 0.55      |      | 3.32  | 0.01 | Up   | 2     | 0.06  |      | Uncharacterized protein                                 |     |
| Pc_TC106673 | 2.63  | ##### | Up   |  | 0     | 1.02E-005 |      | 2.5   | 0.02 | Up   | 0.82  | 0.29  |      | Expressed protein                                       |     |
| Pc_TC106695 | 0.58  | 0.4   |      |  | 0.66  | 0.4       |      | 1.91  | 0.08 |      | 1.49  | 0.05  | Up   | Expressed protein                                       |     |
| Pc_TC106702 | 0.6   | 0.4   |      |  | 1.61  | 0.03      | Up   | -1.78 | 0.17 |      | -0.56 | 0.54  |      | Expressed protein                                       |     |
| Pc_TC106712 | 0.31  | 0.73  |      |  | -0.21 | 0.86      |      | -0.58 | 0.66 |      | -2.18 | 0.05  | Down | Expressed protein                                       |     |
| Pc_TC106723 | 0.73  | 0.27  |      |  | 0.79  | 0.31      |      | -3.11 | 0.02 | Down | -2.5  | 0.01  | Down | Expressed protein                                       |     |
| Pc_TC106733 | 1.94  | 0.02  | Up   |  | 0     | 0.02      |      | 1.53  | 0.24 |      | -0.57 | 0.68  |      | Expressed protein                                       |     |
| Pc_TC106742 | -0.38 | 0.57  |      |  | 0.22  | 0.78      |      | -1.02 | 0.37 |      | -1.62 | 0.05  | Down | Expressed protein                                       |     |
| Pc_TC106746 | 0.91  | 0.22  |      |  | 0.91  | 0.29      |      | -4.08 | 0.01 | Down | -1.96 | 0.07  |      | Expressed protein                                       |     |
| Pc_TC106759 | -0.47 | 0.58  |      |  | -0.59 | 0.54      |      | -2.96 | 0.04 | Down | -4.83 | 0     | Down | Expressed protein                                       |     |
| Pc_TC106760 | 2.25  | 0.09  |      |  | 3.06  | 0.02      | Up   | -1.5  | 0.66 |      | 0.63  | 0.82  |      | Expressed protein                                       |     |
| Pc_TC106764 | 2.64  | 0     | Up   |  | 0     | 0.05      |      | 1.6   | 0.26 |      | 0.92  | 0.45  |      | Expressed protein                                       |     |
| Pc_TC106773 | -0.45 | 0.69  |      |  | 0.44  | 0.69      |      | -1.56 | 0.3  |      | -2.58 | 0.05  | Down | Expressed protein                                       |     |
| Pc_TC106776 | 0.73  | 0.1   |      |  | 1.25  | 0.02      | Up   | -1.34 | 0.18 |      | -0.37 | 0.55  |      | Expressed protein                                       |     |
| Pc_TC106801 | -1.1  | 0.09  |      |  | -2.24 | 0.01      | Down | 1.33  | 0.2  |      | 0.67  | 0.34  |      | Expressed protein                                       |     |
| Pc_TC106803 | 0.08  | 0.92  |      |  | 1.11  | 0.1       |      | -2.61 | 0.03 | Down | -1.55 | 0.05  |      | Expressed protein                                       |     |
| Pc_TC106813 | -2.87 | 0     | Down |  | -3.89 | 0         | Down | -1.12 | 0.34 |      | -4.32 | ##### | Down | actin 2                                                 |     |
| Pc_TC106822 | 0.76  | 0.33  |      |  | 1.71  | 0.03      | Up   | -3.04 | 0.04 | Down | -1.8  | 0.09  |      | Expressed protein                                       |     |
| Pc_TC106829 | 4.06  | ##### | Up   |  | 0     | 0.02      |      | 2.45  | 0.05 |      | 0.52  | 0.68  |      | Heat shock protein 70 (Hsp 70) family protein           |     |
| Pc_TC106832 | 0.12  | 0.86  |      |  | 1.01  | 0.15      |      | -3.1  | 0.01 | Down | -1.42 | 0.08  |      | Expressed protein                                       |     |
| Pc_TC106836 | 2.03  | 0     | Up   |  | 0     | 0         |      | 1.74  | 0.14 |      | 1.01  | 0.26  |      | Expressed protein                                       |     |
| Pc_TC106839 | 0.99  | 0.14  |      |  | 2.15  | 0         | Up   | -1.67 | 0.19 |      | 0.97  | 0.22  |      | Expressed protein                                       |     |
| Pc_TC106842 | 1.75  | 0.04  | Up   |  | -0.24 | 0.9       |      | 0.71  | 0.62 |      | 2.47  | 0.01  | Up   | OSINBa0091C07.10 protein                                |     |
| Pc_TC106847 | -1.37 | 0.02  | Down |  | -0.52 | 0.44      |      | 0.47  | 0.65 |      | -0.63 | 0.36  |      | OSINBa0091C07.10 protein                                |     |
| Pc_TC106852 | -0.76 | 0.25  |      |  | -1.83 | 0.03      | Down | 1.15  | 0.27 |      | -0.17 | 0.83  |      | Expressed protein                                       |     |
| Pc_TC106872 | 0.66  | 0.81  |      |  | 2.96  | 0.02      | Up   | -0.91 | 0.82 |      | 1.43  | 0.39  |      | Expressed protein                                       |     |
| Pc_TC106876 | -1.15 | 0.17  |      |  | 0.12  | 0.92      |      | -0.66 | 0.6  |      | -3.93 | 0     | Down | Expressed protein                                       |     |
| Pc_TC106896 | 1.82  | ##### | Up   |  | -8.17 | 8.08E-013 | Down | 1.42  | 0.13 |      | -0.39 | 0.55  |      | Ribosomal protein S12/S23 family protein                |     |
| Pc_TC106909 | 1.82  | 0     | Up   |  | 0     | 6.53E-009 |      | 1.28  | 0.21 |      | -0.09 | 0.91  |      | Ribosomal protein S11 family protein                    |     |

|             |       |       |      |       |           |      |  |       |           |      |       |       |      |                                               |
|-------------|-------|-------|------|-------|-----------|------|--|-------|-----------|------|-------|-------|------|-----------------------------------------------|
| Pc_TC106921 | -3.38 | 0.02  | Down | -1.82 | 0.17      |      |  | 1.77  | 0.15      |      | 0.95  | 0.32  |      | Expressed protein                             |
| Pc_TC106946 | 0.59  | 0.61  |      | 2.46  | 0.01      | Up   |  | -4.3  | 0.06      |      | -1.86 | 0.21  |      | Expressed protein                             |
| Pc_TC106953 | 0.6   | 0.06  |      | 0.71  | 0.08      |      |  | -3.71 | 8.00E-005 | Down | -1.73 | 0     | Down | Uncharacterized protein                       |
| Pc_TC106957 | -0.28 | 0.75  |      | -0.14 | 0.9       |      |  | -1.32 | 0.3       |      | -1.99 | 0.05  | Down | Expressed protein                             |
| Pc_TC106963 | 1.61  | ##### | Up   | 0.7   | 0.18      |      |  | -0.48 | 0.61      |      | 1.96  | 0     | Up   | Expressed protein                             |
| Pc_TC107012 | 2.06  | 0.01  | Up   | 0     | 0.01      |      |  | 2.33  | 0.05      |      | 0.44  | 0.69  |      | thioredoxin-dependent peroxidase 1            |
| Pc_TC107015 | 2.51  | 0.01  | Up   | 0     | 0.07      |      |  | 2.87  | 0.03      | Up   | 1.7   | 0.12  |      | Expressed protein                             |
| Pc_TC107019 | -1.92 | 0.36  |      | 3.6   | 0         | Up   |  | -2.5  | 0.3       |      | 0     | 0.06  |      | Quinone reductase family protein              |
| Pc_TC107024 | -1.46 | 0.16  |      | -3.21 | 0.02      | Down |  | 1.48  | 0.21      |      | 0.19  | 0.87  |      | alpha/beta-Hydrolases superfamily protein     |
| Pc_TC107028 | 0.44  | 0.46  |      | -0.13 | 0.87      |      |  | -2.46 | 0.04      | Down | 0.53  | 0.46  |      | Expressed protein                             |
| Pc_TC107040 | 0.76  | 0.19  |      | 0.78  | 0.26      |      |  | -2.78 | 0.02      | Down | -1.02 | 0.19  |      | Expressed protein                             |
| Pc_TC107055 | -0.64 | 0.56  |      | 0.34  | 0.77      |      |  | -3.02 | 0.07      |      | -3.31 | 0.02  | Down | Expressed protein                             |
| Pc_TC107061 | 1.01  | 0.19  |      | 0.64  | 0.49      |      |  | 1.97  | 0.09      |      | 1.75  | 0.03  | Up   | kinase interacting (KIP1-like) family protein |
| Pc_TC107065 | -2.44 | 0     | Down | -0.32 | 0.69      |      |  | -3.22 | 0.01      | Down | -1.34 | 0.1   |      | Expressed protein                             |
| Pc_TC107073 | -0.18 | 0.85  |      | 0.69  | 0.42      |      |  | -3.3  | 0.03      | Down | -0.48 | 0.61  |      | Expressed protein                             |
| Pc_TC107076 | -0.61 | 0.6   |      | -0.87 | 0.49      |      |  | -2.57 | 0.12      |      | -3.77 | 0.01  | Down | Expressed protein                             |
| Pc_TC107077 | -0.06 | 0.95  |      | -0.51 | 0.54      |      |  | -0.85 | 0.47      |      | -1.88 | 0.03  | Down | Expressed protein                             |
| Pc_TC107080 | 2.47  | 0.01  | Up   | 0     | 0.11      |      |  | 2.48  | 0.08      |      | 0.21  | 0.97  |      | Protein of unknown function (DUF1279)         |
| Pc_TC107084 | 1.89  | 0.38  |      | 1.38  | 0.65      |      |  | 3.67  | 0.04      | Up   | 1.8   | 0.42  |      | Expressed protein                             |
| Pc_TC107098 | 0.76  | 0.38  |      | 1.8   | 0.04      | Up   |  | 0.37  | 0.8       |      | -0.14 | 0.93  |      | Expressed protein                             |
| Pc_TC107099 | 0.22  | 0.87  |      | 0.33  | 0.8       |      |  | -4.74 | 0.03      | Down | -1.62 | 0.21  |      | Uncharacterized protein                       |
| Pc_TC107104 | -2.06 | 0.03  | Down | -1.82 | 0.08      |      |  | -0.05 | 0.98      |      | -0.98 | 0.3   |      | Expressed protein                             |
| Pc_TC107121 | -0.14 | 0.89  |      | -2.33 | 0.04      | Down |  | 1.35  | 0.24      |      | 0.5   | 0.57  |      | Expressed protein                             |
| Pc_TC107123 | -0.49 | 0.58  |      | 0.23  | 0.82      |      |  | 3.07  | 0.01      | Up   | 1.53  | 0.05  |      | Expressed protein                             |
| Pc_TC107129 | -0.29 | 0.71  |      | 0.66  | 0.4       |      |  | -2.06 | 0.1       |      | -2.24 | 0.02  | Down | Expressed protein                             |
| Pc_TC107131 | -1.09 | 0.29  |      | 0.21  | 0.87      |      |  | -1    | 0.48      |      | -2.54 | 0.04  | Down | Expressed protein                             |
| Pc_TC107151 | -0.12 | 0.88  |      | 0.7   | 0.35      |      |  | 0     | 3.05E-005 |      | -5.64 | ##### | Down | Expressed protein                             |
| Pc_TC107170 | -1.17 | 0.18  |      | -1.73 | 0.09      |      |  | 2.43  | 0.03      | Up   | 0.83  | 0.31  |      | Expressed protein                             |
| Pc_TC107187 | 0.53  | 0.45  |      | 0.63  | 0.43      |      |  | -5.33 | 0         | Down | -2.89 | 0     | Down | Expressed protein                             |
| Pc_TC107188 | 0.04  | 0.99  |      | 1.11  | 0.17      |      |  | -3.12 | 0.03      | Down | -3.22 | 0     | Down | Expressed protein                             |
| Pc_TC107218 | -0.33 | 0.63  |      | -1.73 | 0.04      | Down |  | -1.79 | 0.13      |      | -4.11 | ##### | Down | Expressed protein                             |
| Pc_TC107219 | 0.95  | 0.14  |      | 1.62  | 0.02      | Up   |  | -3.04 | 0.02      | Down | -1.09 | 0.21  |      | Expressed protein                             |
| Pc_TC107236 | -1.14 | 0     | Down | -1.02 | 0.03      | Down |  | 0.52  | 0.54      |      | -0.1  | 0.86  |      | Expressed protein                             |
| Pc_TC107249 | 0.12  | 0.85  |      | 0.51  | 0.45      |      |  | -3.52 | 0         | Down | -3.24 | 0     | Down | OSJNBa0091D06.13 protein                      |
| Pc_TC107255 | -0.35 | 0.6   |      | 0     | 1.15E-007 |      |  | -0.44 | 0.69      |      | -1.78 | 0.03  | Down | Expressed protein                             |
| Pc_TC107263 | 1.36  | 0.03  | Up   | -6.01 | 2.16E-005 | Down |  | 1.44  | 0.18      |      | 0.35  | 0.66  |      | actin-11                                      |
| Pc_TC107272 | 0.22  | 0.79  |      | -0.33 | 0.74      |      |  | -1.66 | 0.2       |      | -2.12 | 0.03  | Down | Expressed protein                             |
| Pc_TC107276 | -1.51 | 0.21  |      | -1.33 | 0.31      |      |  | -0.13 | 0.96      |      | -4.77 | 0.01  | Down | Expressed protein                             |
| Pc_TC107288 | 0.53  | 0.31  |      | 0.55  | 0.38      |      |  | -3.53 | 0         | Down | -0.61 | 0.38  |      | Expressed protein                             |
| Pc_TC107300 | -0.74 | 0.27  |      | -1.84 | 0.03      | Down |  | 0.9   | 0.4       |      | 0.19  | 0.81  |      | Expressed protein                             |
| Pc_TC107305 | 1.23  | 0.08  |      | 0     | 0         |      |  | 1.4   | 0.22      |      | -2.77 | 0.01  | Down | Uncharacterized protein (Fragment)            |
| Pc_TC107306 | 2.76  | 0     | Up   | 0     | 0.07      |      |  | 4.12  | 0         | Up   | 1.55  | 0.17  |      | Expressed protein                             |
| Pc_TC107307 | 2.02  | 0     | Up   | 0     | 0         |      |  | 1.73  | 0.12      |      | 0.61  | 0.48  |      | Uncharacterized protein (Fragment)            |
| Pc_TC107326 | -0.26 | 0.86  |      | -0.49 | 0.72      |      |  | -3.74 | 0.05      | Down | -4.62 | 0.01  | Down | Expressed protein                             |
| Pc_TC107331 | 2.32  | 0.03  | Up   | 0.71  | 0.69      |      |  | 2.7   | 0.06      |      | 3.1   | 0     | Up   | Expressed protein                             |
| Pc_TC107338 | 0.3   | 0.67  |      | -1.21 | 0.17      |      |  | 2.73  | 0.01      | Up   | 0.69  | 0.37  |      | Expressed protein                             |
| Pc_TC107356 | 0.44  | 0.73  |      | 0.84  | 0.48      |      |  | 0     | 0.02      |      | -4.18 | 0.03  | Down | Expressed protein                             |
| Pc_TC107363 | -0.33 | 0.51  |      | -3.12 | 1.34E-005 | Down |  | 0.44  | 0.65      |      | -0.19 | 0.77  |      | Expressed protein                             |
| Pc_TC107365 | 1.73  | 0     | Up   | 0.83  | 0.28      |      |  | 1.36  | 0.22      |      | 0.23  | 0.79  |      | Expressed protein                             |
| Pc_TC107373 | -3.73 | 0.05  | Down | -1.75 | 0.28      |      |  | -0.3  | 0.89      |      | -1.86 | 0.21  |      | Expressed protein                             |
| Pc_TC107380 | 0.01  | 1     |      | 1.16  | 0.11      |      |  | -3.28 | 0.01      | Down | -1.9  | 0.03  | Down | Expressed protein                             |
| Pc_TC107400 | 0     | 0.31  |      | -0.94 | 0.84      |      |  | 3.15  | 0.04      | Up   | 2.02  | 0.17  |      | Uncharacterized protein                       |
| Pc_TC107410 | -0.18 | 0.82  |      | 0.16  | 0.86      |      |  | -1.07 | 0.37      |      | -2.27 | 0.01  | Down | Expressed protein                             |
| Pc_TC107418 | 2.24  | ##### | Up   | 0     | 5.34E-013 |      |  | 1.3   | 0.18      |      | -0.13 | 0.85  |      | DEA(D/H)-box RNA helicase family protein      |
| Pc_TC107420 | -3.73 | 0.05  | Down | -2.75 | 0.13      |      |  | -0.6  | 0.73      |      | -4.18 | 0.03  | Down | Pyruvate kinase                               |
| Pc_TC107425 | 2.23  | ##### | Up   | -9.16 | 9.57E-025 | Down |  | 1.98  | 0.02      | Up   | 0.87  | 0.1   |      | cytochrome c oxidase subunit 3                |
| Pc_TC107428 | 0.58  | 0.45  |      | 1.48  | 0.06      |      |  | -2.85 | 0.05      | Down | -2.41 | 0.02  | Down | Expressed protein                             |
| Pc_TC107451 | -0.08 | 0.96  |      | -3.64 | 0.01      | Down |  | 1.91  | 0.09      |      | 0.61  | 0.49  |      | Expressed protein                             |
| Pc_TC107455 | -0.56 | 0.4   |      | 1.47  | 0.03      | Up   |  | -1.65 | 0.15      |      | -1.99 | 0.02  | Down | Ribosomal protein S4 (RPS4A) family protein   |
| Pc_TC107468 | -0.11 | 0.88  |      | 0.9   | 0.18      |      |  | -2.61 | 0.03      | Down | -0.96 | 0.21  |      | Expressed protein                             |
| Pc_TC107474 | 0.67  | 0.2   |      | 1.68  | 0         | Up   |  | 0     | 4.04E-007 |      | -3.37 | ##### | Down | Expressed protein                             |
| Pc_TC107514 | 0.14  | 0.74  |      | 0.49  | 0.32      |      |  | 0     | 2.41E-011 |      | -4.17 | ##### | Down | Expressed protein                             |

|             |       |       |      |       |           |      |       |      |      |       |      |      |                                                    |
|-------------|-------|-------|------|-------|-----------|------|-------|------|------|-------|------|------|----------------------------------------------------|
| Pc_TC107517 | -0.34 | 0.8   |      | -0.46 | 0.74      |      | -2.23 | 0.17 |      | -3.11 | 0.03 | Down | Expressed protein                                  |
| Pc_TC107524 | 3.26  | ##### | Up   | 0     | 0.07      |      | 1.83  | 0.19 |      | 0.76  | 0.56 |      | Expressed protein                                  |
| Pc_TC107527 | -0.82 | 0.19  |      | -1.65 | 0.03      | Down | 2.23  | 0.03 | Up   | 0.65  | 0.35 |      | OSIGBa0155K17.2 protein                            |
| Pc_TC107530 | -0.71 | 0.42  |      | -2.87 | 0.02      | Down | -2.29 | 0.1  |      | -0.58 | 0.55 |      | Expressed protein                                  |
| Pc_TC107534 | -5.23 | ##### | Down | -2.31 | 0.01      | Down | -0.1  | 0.93 |      | -2.14 | 0.01 | Down | Expressed protein                                  |
| Pc_TC107546 | -1.09 | 0.24  |      | -0.86 | 0.41      |      | -3.67 | 0.02 | Down | -1.15 | 0.25 |      | Expressed protein                                  |
| Pc_TC107548 | 0.18  | 0.81  |      | 0.12  | 0.9       |      | -1.31 | 0.27 |      | -1.86 | 0.04 | Down | Expressed protein                                  |
| Pc_TC107559 | 2.48  | 0.01  | Up   | 0     | 0.07      |      | 1.57  | 0.27 |      | -0.11 | 1    |      | cytochrome B5 isoform B                            |
| Pc_TC107570 | -1.25 | 0.1   |      | -1.94 | 0.04      | Down | -0.61 | 0.61 |      | -0.56 | 0.51 |      | Putative uncharacterized protein OJ1148 D05.23     |
| Pc_TC107571 | -0.97 | 0.32  |      | 0.01  | 1         |      | -4.45 | 0.01 | Down | -4.33 | 0    | Down | Expressed protein                                  |
| Pc_TC107582 | -0.08 | 0.97  |      | 0.2   | 0.87      |      | -3.72 | 0.03 | Down | -1.6  | 0.15 |      | Expressed protein                                  |
| Pc_TC107585 | 2.05  | 0.02  | Up   | 1.94  | 0.05      |      | -2.61 | 0.18 |      | -1.75 | 0.25 |      | Expressed protein                                  |
| Pc_TC107587 | 1.95  | 0.01  | Up   | 2.22  | 0.01      | Up   | -2.82 | 0.07 |      | 0.76  | 0.4  |      | Expressed protein                                  |
| Pc_TC107588 | 2.14  | 0.01  | Up   | 1.73  | 0.07      |      | -4.58 | 0.03 | Down | -0.21 | 0.9  |      | Expressed protein                                  |
| Pc_TC107590 | 2.99  | 0.01  | Up   | 3.92  | 0         | Up   | 0.09  | 1    |      | 1.63  | 0.31 |      | Expressed protein                                  |
| Pc_TC107598 | 0.48  | 0.35  |      | 0.59  | 0.34      |      | -2.71 | 0.02 | Down | -1.97 | 0.01 | Down | Expressed protein                                  |
| Pc_TC107613 | -0.06 | 0.89  |      | -0.15 | 0.77      |      | -1.62 | 0.09 |      | -1.41 | 0.02 | Down | ROTUNDIFOLIA like 8                                |
| Pc_TC107617 | 0.06  | 0.96  |      | 0.46  | 0.56      |      | 0.89  | 0.42 |      | 2.02  | 0    | Up   | Expressed protein                                  |
| Pc_TC107645 | 1.84  | 0.16  |      | 2.59  | 0.04      | Up   | -0.5  | 0.91 |      | 0.11  | 1    |      | Expressed protein                                  |
| Pc_TC107646 | -0.92 | 0.36  |      | -1.29 | 0.27      |      | -2.98 | 0.06 |      | -2.37 | 0.05 | Down | Expressed protein                                  |
| Pc_TC107654 | 0.02  | 1     |      | 1.74  | 0.05      | Up   | 0     | 0    |      | 0     | 0    |      | Expressed protein                                  |
| Pc_TC107656 | 0.84  | 0.31  |      | 1.8   | 0.04      | Up   | -2.2  | 0.15 |      | 0.68  | 0.48 |      | Expressed protein                                  |
| Pc_TC107657 | -0.04 | 1     |      | 0.36  | 0.7       |      | -4.78 | 0.01 | Down | -0.75 | 0.44 |      | Expressed protein                                  |
| Pc_TC107702 | -0.92 | 0.41  |      | -1.82 | 0.17      |      | -0.63 | 0.67 |      | -2.83 | 0.04 | Down | Expressed protein                                  |
| Pc_TC107712 | -1.6  | 0.07  |      | -1.13 | 0.24      |      | -1.5  | 0.24 |      | -1.96 | 0.05 | Down | Expressed protein                                  |
| Pc_TC107746 | 1.62  | 0     | Up   | 0     | 5.01E-007 |      | 1.24  | 0.24 |      | 0.1   | 0.91 |      | eukaryotic elongation factor 5A-1                  |
| Pc_TC107759 | -1.4  | 0.04  | Down | -1.62 | 0.04      | Down | 1.41  | 0.17 |      | 0.21  | 0.77 |      | Expressed protein                                  |
| Pc_TC107774 | -0.46 | 0.44  |      | -0.99 | 0.17      |      | 2.03  | 0.04 | Up   | 0.97  | 0.15 |      | Expressed protein                                  |
| Pc_TC107802 | 1.89  | 0.03  | Up   | 1.89  | 0.06      |      | -0.06 | 1    |      | 0.4   | 0.77 |      | Expressed protein                                  |
| Pc_TC107804 | -1.13 | 0.26  |      | 0.11  | 0.95      |      | 2.68  | 0.02 | Up   | 2.14  | 0.01 | Up   | Expressed protein                                  |
| Pc_TC107810 | -1    | 0.18  |      | -1.86 | 0.04      | Down | 0.45  | 0.69 |      | -0.1  | 0.91 |      | Putative endonuclease or glycosyl hydrolase        |
| Pc_TC107817 | 0.56  | 0.48  |      | 0.63  | 0.49      |      | -3.3  | 0.03 | Down | -1.92 | 0.07 |      | Expressed protein                                  |
| Pc_TC107835 | -0.77 | 0.33  |      | 0.83  | 0.3       |      | -1.93 | 0.13 |      | -2.22 | 0.02 | Down | Ribosomal protein S8 family protein                |
| Pc_TC107837 | -0.09 | 0.97  |      | -1.24 | 0.29      |      | -1.55 | 0.28 |      | -3.13 | 0.02 | Down | Expressed protein                                  |
| Pc_TC107865 | 0.38  | 0.46  |      | 0.35  | 0.57      |      | -1.77 | 0.1  |      | -1.95 | 0.01 | Down | Expressed protein                                  |
| Pc_TC107873 | 0.27  | 0.64  |      | 1.32  | 0.04      | Up   | -2.65 | 0.02 | Down | -2.53 | 0    | Down | Expressed protein                                  |
| Pc_TC107878 | -0.41 | 0.54  |      | 0.74  | 0.29      |      | -3.15 | 0.01 | Down | -1.68 | 0.04 | Down | Expressed protein                                  |
| Pc_TC107889 | -0.13 | 0.86  |      | -0.99 | 0.22      |      | 0.67  | 0.54 |      | 1.43  | 0.04 | Up   | Expressed protein                                  |
| Pc_TC107900 | -0.86 | 0.19  |      | 0.35  | 0.62      |      | -1.54 | 0.18 |      | -1.71 | 0.03 | Down | Expressed protein                                  |
| Pc_TC107917 | 2.15  | 0     | Up   | 0     | 3.51E-005 |      | 1.86  | 0.09 |      | 0.11  | 0.92 |      | Expressed protein                                  |
| Pc_TC107963 | 1.11  | 0.18  |      | 1.99  | 0.02      | Up   | -2.21 | 0.16 |      | -0.65 | 0.57 |      | Expressed protein                                  |
| Pc_TC107965 | 1.19  | 0.08  |      | 0.8   | 0.33      |      | -3.5  | 0.02 | Down | -2.26 | 0.02 | Down | Expressed protein                                  |
| Pc_TC107975 | 0.54  | 0.16  |      | -0.1  | 0.85      |      | 0.89  | 0.31 |      | 1.35  | 0.01 | Up   | Expressed protein                                  |
| Pc_TC107976 | -0.46 | 0.51  |      | -0.17 | 0.84      |      | -1.66 | 0.16 |      | -2.16 | 0.01 | Down | Uncharacterized protein                            |
| Pc_TC107980 | -0.32 | 0.76  |      | -0.05 | 1         |      | -0.6  | 0.67 |      | -3.23 | 0.01 | Down | Expressed protein                                  |
| Pc_TC107993 | -2.62 | 0.03  | Down | -0.32 | 0.8       |      | 0.2   | 0.91 |      | -0.17 | 0.9  |      | Uncharacterized protein                            |
| Pc_TC108001 | -1.04 | 0.48  |      | 0.75  | 0.55      |      | 0     | 0.03 |      | -4.08 | 0.04 | Down | Expressed protein                                  |
| Pc_TC108011 | 3.27  | ##### | Up   | 0     | 0.01      |      | 3.41  | 0    | Up   | 1.78  | 0.05 |      | Myzus persicae-induced lipase 1                    |
| Pc_TC108013 | 0.3   | 0.61  |      | 0.62  | 0.36      |      | -5.16 | 0    | Down | -3.04 | 0    | Down | Expressed protein                                  |
| Pc_TC108029 | -1.35 | 0.16  |      | -0.03 | 1         |      | -3.04 | 0.04 | Down | -1.5  | 0.15 |      | Expressed protein                                  |
| Pc_TC108034 | -1.18 | 0.14  |      | -1.14 | 0.22      |      | 2.16  | 0.05 | Up   | 0.87  | 0.27 |      | Expressed protein                                  |
| Pc_TC108038 | 0.08  | 0.93  |      | 1.05  | 0.16      |      | -3.47 | 0.01 | Down | -2.35 | 0.01 | Down | Expressed protein                                  |
| Pc_TC108052 | -1.75 | 0.04  | Down | -0.97 | 0.29      |      | 0.43  | 0.72 |      | -0.21 | 0.82 |      | Expressed protein                                  |
| Pc_TC108074 | 0.73  | 0.2   |      | 0.61  | 0.37      |      | -2.97 | 0.01 | Down | -1.04 | 0.17 |      | Expressed protein                                  |
| Pc_TC108083 | -1.14 | 0.42  |      | 0.16  | 0.96      |      | -0.72 | 0.68 |      | -4.18 | 0.03 | Down | Expressed protein                                  |
| Pc_TC108087 | 1.03  | 0.11  |      | 1.1   | 0.14      |      | -2.97 | 0.03 | Down | -1.14 | 0.2  |      | Ubiquitin carboxyl-terminal hydrolase              |
| Pc_TC108091 | 0.71  | 0.1   |      | 0.3   | 0.58      |      | -2.58 | 0.01 | Down | -0.02 | 0.97 |      | Expressed protein                                  |
| Pc_TC108115 | 0.6   | 0.2   |      | 0.83  | 0.14      |      | -1.7  | 0.1  |      | -1.51 | 0.03 | Down | Expressed protein                                  |
| Pc_TC108121 | 0.54  | 0.35  |      | 0.54  | 0.43      |      | -3.44 | 0.01 | Down | -0.78 | 0.3  |      | Expressed protein                                  |
| Pc_TC108128 | -0.38 | 0.68  |      | -0.45 | 0.66      |      | -0.46 | 0.73 |      | -2.12 | 0.05 | Down | Expressed protein                                  |
| Pc_TC108129 | -0.07 | 0.97  |      | -0.38 | 0.7       |      | 1.47  | 0.2  |      | 1.88  | 0.02 | Up   | Expressed protein                                  |
| Pc_TC108134 | -0.4  | 0.5   |      | 1.71  | 0         | Up   | -1.33 | 0.22 |      | -1.59 | 0.03 | Down | cysteine-rich RLK (RECEPTOR-like protein kinase) 8 |

|             |       |       |      |       |           |      |       |           |      |       |       |      |                                                      |
|-------------|-------|-------|------|-------|-----------|------|-------|-----------|------|-------|-------|------|------------------------------------------------------|
| Pc_TC108136 | 0.15  | 0.72  |      | 0.12  | 0.82      |      | -2.64 | 0.01      | Down | -2.12 | 0     | Down | Expressed protein                                    |
| Pc_TC108138 | -1.09 | 0.24  |      | -2.53 | 0.03      | Down | 1.19  | 0.31      |      | 0.61  | 0.5   |      | Expressed protein                                    |
| Pc_TC108147 | 0.45  | 0.48  |      | 0.62  | 0.4       |      | -2.84 | 0.02      | Down | -0.94 | 0.24  |      | Expressed protein                                    |
| Pc_TC108168 | -2.41 | 0.04  | Down | -0.66 | 0.56      |      | 1     | 0.42      |      | 0.21  | 0.86  |      | Expressed protein                                    |
| Pc_TC108169 | 0.28  | 0.63  |      | 0.7   | 0.29      |      | -3.62 | 0         | Down | -0.97 | 0.2   |      | Expressed protein                                    |
| Pc_TC108171 | -1.22 | 0.02  | Down | -0.79 | 0.21      |      | -0.17 | 0.87      |      | -2.27 | 0     | Down | binding                                              |
| Pc_TC108172 | -1.45 | 0.03  | Down | -1.37 | 0.09      |      | -0.89 | 0.42      |      | -1.23 | 0.12  |      | binding                                              |
| Pc_TC108188 | -4.14 | 0     | Down | -1.75 | 0.07      |      | -1.84 | 0.15      |      | -6.18 | ##### | Down | Expressed protein                                    |
| Pc_TC108190 | -2.89 | 0     | Down | -3.17 | 0.01      | Down | -0.41 | 0.75      |      | -1.47 | 0.12  |      | Expressed protein                                    |
| Pc_TC108191 | 0.08  | 1     |      | -0.62 | 0.8       |      | 2.41  | 0.09      |      | 2.21  | 0.05  | Up   | Expressed protein                                    |
| Pc_TC108192 | 2.89  | 0     | Up   | 2.93  | 0.01      | Up   | 3.13  | 0.03      | Up   | 2.95  | 0.01  | Up   | Expressed protein                                    |
| Pc_TC108195 | -0.42 | 0.55  |      | -1.72 | 0.05      | Down | 1.22  | 0.25      |      | 0.88  | 0.23  |      | Expressed protein                                    |
| Pc_TC108208 | 3.47  | 0.02  | Up   | 2.06  | 0.36      |      | 4.65  | 0         | Up   | 3.91  | 0.01  | Up   | Expressed protein                                    |
| Pc_TC108225 | 0.63  | 0.14  |      | 0.15  | 0.79      |      | -3.36 | 0         | Down | -1.37 | 0.03  | Down | Expressed protein                                    |
| Pc_TC108226 | 0.48  | 0.47  |      | 0.91  | 0.22      |      | -2.68 | 0.04      | Down | -0.82 | 0.33  |      | Expressed protein                                    |
| Pc_TC108227 | 0.91  | 0.14  |      | 1.4   | 0.05      | Up   | -3.38 | 0.01      | Down | -1.88 | 0.03  | Down | Expressed protein                                    |
| Pc_TC108235 | -0.01 | 1     |      | -0.91 | 0.27      |      | 1.22  | 0.25      |      | 1.67  | 0.02  | Up   | Expressed protein                                    |
| Pc_TC108239 | -4.03 | ##### | Down | 0     | 2.85E-006 |      | -2.44 | 0.06      |      | -4.9  | ##### | Down | Expressed protein                                    |
| Pc_TC108240 | -3.09 | 0.04  | Down | -0.79 | 0.56      |      | -0.14 | 0.96      |      | -0.22 | 0.89  |      | Expressed protein                                    |
| Pc_TC108241 | 0     | 0.16  |      | 0.47  | 0.86      |      | 2.98  | 0.04      | Up   | 1.9   | 0.14  |      | OSJNBa0073L04.6 protein                              |
| Pc_TC108259 | 1.71  | 0.03  | Up   | -0.23 | 0.88      |      | 0.5   | 0.72      |      | 0.81  | 0.41  |      | putative Ty1-copia subclass                          |
| Pc_TC108272 | -1.14 | 0.26  |      | 0.25  | 0.83      |      | 0     | 0         |      | -2.6  | 0.03  | Down | UniRef100                                            |
| Pc_TC108279 | 0.41  | 0.59  |      | 1.64  | 0.03      | Up   | -2.32 | 0.09      |      | -2.44 | 0.02  | Down | Expressed protein                                    |
| Pc_TC108295 | 2.21  | 0.01  | Up   | 0     | 0.02      |      | 2     | 0.12      |      | 0.58  | 0.62  |      | Expressed protein                                    |
| Pc_TC108304 | -1.27 | 0.03  | Down | -0.55 | 0.42      |      | -1.79 | 0.1       |      | 0.41  | 0.54  |      | Uncharacterized protein                              |
| Pc_TC108309 | 1.08  | 0.4   |      | 2.27  | 0.04      | Up   | -0.17 | 0.99      |      | -0.05 | 1     |      | Expressed protein                                    |
| Pc_TC108314 | 0.65  | 0.45  |      | 0.39  | 0.71      |      | 2.95  | 0.01      | Up   | 1.49  | 0.09  |      | Uncharacterized protein                              |
| Pc_TC108326 | -0.3  | 0.88  |      | -1.64 | 0.33      |      | 3.81  | 0         | Up   | 0.57  | 0.65  |      | Expressed protein                                    |
| Pc_TC108331 | -1.17 | 0.34  |      | -0.28 | 0.86      |      | -0.66 | 0.68      |      | -4.62 | 0.01  | Down | Expressed protein                                    |
| Pc_TC108334 | 0.43  | 0.78  |      | 2.43  | 0.02      | Up   | -0.63 | 0.75      |      | -0.13 | 0.99  |      | aldehyde dehydrogenase 12A1                          |
| Pc_TC108342 | 0.18  | 0.78  |      | 1.07  | 0.12      |      | -2.5  | 0.04      | Down | -1.81 | 0.03  | Down | Expressed protein                                    |
| Pc_TC108354 | 0.39  | 0.69  |      | 1.77  | 0.04      | Up   | -3.14 | 0.06      |      | -1.85 | 0.12  |      | Expressed protein                                    |
| Pc_TC108356 | 0.37  | 0.7   |      | -0.45 | 0.7       |      | -3.67 | 0.03      | Down | -0.37 | 0.74  |      | Expressed protein                                    |
| Pc_TC108364 | -0.3  | 0.66  |      | 0.57  | 0.43      |      | -2.16 | 0.07      |      | -1.66 | 0.04  | Down | Expressed protein                                    |
| Pc_TC108384 | 0.73  | 0.24  |      | -0.71 | 0.39      |      | 1.61  | 0.13      |      | 2.91  | ##### | Up   | Uncharacterized protein                              |
| Pc_TC108391 | 0.06  | 0.9   |      | 0.31  | 0.6       |      | -3.25 | 0         | Down | -1.04 | 0.11  |      | Expressed protein                                    |
| Pc_TC108394 | -2.57 | 0.04  | Down | -1.26 | 0.3       |      | 0.95  | 0.45      |      | 0.68  | 0.48  |      | Expressed protein                                    |
| Pc_TC108401 | 3.26  | ##### | Up   | 0     | 0.07      |      | 3.19  | 0.01      | Up   | 1.3   | 0.26  |      | Expressed protein                                    |
| Pc_TC108409 | 2.08  | 0.07  |      | 3.43  | 0         | Up   | 0.73  | 0.73      |      | 1.68  | 0.2   |      | Expressed protein                                    |
| Pc_TC108412 | -2.18 | 0.07  |      | -0.83 | 0.49      |      | -5.08 | 0.01      | Down | -1.15 | 0.31  |      | mitochondrial F0-ATPase subunit 9                    |
| Pc_TC108443 | 0.22  | 0.72  |      | 0.01  | 1         |      | -2.46 | 0.03      | Down | -0.9  | 0.22  |      | Expressed protein                                    |
| Pc_TC108466 | 2.05  | 0     | Up   | 0     | 0         |      | 1.37  | 0.26      |      | -0.27 | 0.82  |      | Expressed protein                                    |
| Pc_TC108472 | 0.19  | 0.62  |      | 0.38  | 0.43      |      | -2.39 | 0.01      | Down | -1.8  | 0     | Down | Expressed protein                                    |
| Pc_TC108486 | 3.48  | ##### | Up   | 0     | 0         |      | 3.52  | 0         | Up   | 1     | 0.24  |      | Expressed protein                                    |
| Pc_TC108503 | 0.16  | 0.85  |      | 1.01  | 0.2       |      | -3.82 | 0.01      | Down | -3.43 | 0     | Down | Expressed protein                                    |
| Pc_TC108505 | -5.62 | ##### | Down | 0     | 2.64E-005 |      | 0     | 0         |      | 0     | ##### |      | Expressed protein                                    |
| Pc_TC108581 | -2.24 | 0.09  |      | -1.68 | 0.22      |      | -4.82 | 0.02      | Down | -3.11 | 0.03  | Down | Expressed protein                                    |
| Pc_TC108585 | -2.41 | 0.01  | Down | -0.22 | 0.83      |      | 1.1   | 0.34      |      | 0.18  | 0.86  |      | Expressed protein                                    |
| Pc_TC108599 | -0.35 | 0.72  |      | -3.9  | 0.01      | Down | 0.64  | 0.61      |      | 0.82  | 0.36  |      | Expressed protein                                    |
| Pc_TC108605 | 0     | 0.01  |      | 0.41  | 0.74      |      | -3.67 | 0.06      |      | -3.54 | 0.03  | Down | Expressed protein                                    |
| Pc_TC108606 | 1.06  | 0.05  | Up   | 0.79  | 0.23      |      | -0.02 | 0.99      |      | 0.43  | 0.54  |      | Expressed protein                                    |
| Pc_TC108627 | 0.38  | 0.35  |      | 0.3   | 0.56      |      | -6.38 | 2.37E-007 | Down | -3.51 | ##### | Down | Expressed protein                                    |
| Pc_TC108639 | -0.16 | 0.87  |      | -2.14 | 0.04      | Down | 1.21  | 0.29      |      | 0.97  | 0.23  |      | Expressed protein                                    |
| Pc_TC108644 | 0.22  | 0.76  |      | 0.75  | 0.32      |      | -2.78 | 0.03      | Down | -1.82 | 0.04  | Down | Expressed protein                                    |
| Pc_TC108670 | -0.32 | 0.71  |      | 0.23  | 0.81      |      | -2.7  | 0.05      |      | -2.9  | 0.01  | Down | Expressed protein                                    |
| Pc_TC108673 | -0.96 | 0.27  |      | -0.26 | 0.81      |      | -1.33 | 0.31      |      | -2.56 | 0.02  | Down | Expressed protein                                    |
| Pc_TC108680 | 1.14  | 0.03  | Up   | -0.46 | 0.51      |      | 0.59  | 0.57      |      | 1.92  | 0     | Up   | Expressed protein                                    |
| Pc_TC108696 | 1.64  | 0.02  | Up   | 1.1   | 0.2       |      | 1.17  | 0.32      |      | -0.37 | 0.71  |      | Expressed protein                                    |
| Pc_TC108698 | -1.99 | 0.01  | Down | -1.67 | 0.04      | Down | -3.86 | 0         | Down | -2.29 | 0.01  | Down | Expressed protein                                    |
| Pc_TC108702 | 0.4   | 0.85  |      | 2.31  | 0.04      | Up   | -0.69 | 0.77      |      | -1.05 | 0.58  |      | phosphate transporter 3;1                            |
| Pc_TC108721 | -3.45 | 0.02  | Down | -0.88 | 0.47      |      | -1.32 | 0.37      |      | -0.9  | 0.43  |      | Reverse transcriptase (RNA-dependent DNA polymerase) |
| Pc_TC108744 | 0.24  | 0.63  |      | 0.68  | 0.25      |      | -2.16 | 0.04      | Down | -0.97 | 0.15  |      | Expressed protein                                    |

|             |       |       |      |       |           |      |       |      |      |       |      |      |                                                                           |      |
|-------------|-------|-------|------|-------|-----------|------|-------|------|------|-------|------|------|---------------------------------------------------------------------------|------|
| Pc_TC108758 | -1.45 | 0.21  |      | -0.47 | 0.71      |      | -1.11 | 0.45 |      | -3.9  | 0.01 | Down | Putative uncharacterized protein                                          |      |
| Pc_TC108759 | 4.66  | 0     | Up   | 5.1   | 0         | Up   | 4.63  | 0.02 | Up   | 2.95  | 0.22 |      | Expressed protein                                                         |      |
| Pc_TC108760 | -1.9  | 0.02  | Down | -0.45 | 0.6       |      | -0.79 | 0.5  |      | -0.97 | 0.25 |      | Expressed protein                                                         |      |
| Pc_TC108765 | -3.51 | 0.01  | Down | -1.94 | 0.14      |      | -2.76 | 0.09 |      | -1.5  | 0.2  |      | Uncharacterized protein                                                   |      |
| Pc_TC108767 | -1.7  | 0.14  |      | -0.13 | 0.94      |      | -3.5  | 0.04 | Down | -1.64 | 0.17 |      | Expressed protein                                                         |      |
| Pc_TC108775 | 1.31  | 0.1   |      | 1.99  | 0.02      | Up   | -3.02 | 0.07 |      | 0     | 0    |      | Expressed protein                                                         |      |
| Pc_TC108777 | -2.78 | 0.02  | Down | -3.8  | 0.01      | Down | -0.5  | 0.72 |      | -1.53 | 0.16 |      | Expressed protein                                                         |      |
| Pc_TC108778 | 2.54  | 0.15  |      | 3.38  | 0.04      | Up   | 0.5   | 1    |      | 1.43  | 0.58 |      | Expressed protein                                                         |      |
| Pc_TC108781 | 0.41  | 0.45  |      | 0.71  | 0.26      |      | -0.8  | 0.45 |      | -1.45 | 0.05 | Down | Expressed protein                                                         |      |
| Pc_TC108785 | 0.07  | 0.88  |      | 0.2   | 0.71      |      | -3.29 | 0    | Down | -1.98 | 0    | Down | Expressed protein                                                         |      |
| Pc_TC108798 | -0.64 | 0.44  |      | -0.07 | 0.96      |      | -1.93 | 0.14 |      | -1.99 | 0.05 | Down | Retrovirus-related Pol polyprotein LINE-1                                 |      |
| Pc_TC108804 | 0.59  | 0.1   |      | 1.11  | 0.01      | Up   | -3.32 | 0    | Down | -1.61 | 0.01 | Down | Uncharacterized protein                                                   |      |
| Pc_TC108825 | -0.92 | 0.35  |      | -1.15 | 0.31      |      | -2.23 | 0.13 |      | -2.47 | 0.04 | Down | Expressed protein                                                         |      |
| Pc_TC108855 | -2.73 | 0.02  | Down | 0.11  | 0.95      |      | -1.06 | 0.45 |      | -1.09 | 0.31 |      | Putative uncharacterized protein Sb07g001477 (Fragment)                   |      |
| Pc_TC108879 | -0.51 | 0.76  |      | -0.07 | 1         |      | 2.46  | 0.06 |      | 2.47  | 0.01 | Up   | Expressed protein                                                         |      |
| Pc_TC108896 | -0.96 | 0.1   |      | -1.7  | 0.02      | Down | 0.27  | 0.8  |      | -0.01 | 1    |      | Expressed protein                                                         |      |
| Pc_TC108916 | 0.49  | 0.18  |      | -0.13 | 0.79      |      | -2.25 | 0.02 | Down | 0.04  | 0.94 |      | Expressed protein                                                         |      |
| Pc_TC108922 | 0.03  | 1     |      | 0.67  | 0.47      |      | -2.5  | 0.09 |      | -3.37 | 0.01 | Down | Expressed protein                                                         |      |
| Pc_TC108934 | -2.98 | 0.02  | Down | -0.78 | 0.51      |      | 0.44  | 0.75 |      | -3.02 | 0.02 | Down | Expressed protein                                                         |      |
| Pc_TC108953 | 0.44  | 0.49  |      | 0.9   | 0.21      |      | -2.48 | 0.05 | Down | -2.11 | 0.02 | Down | Expressed protein                                                         |      |
| Pc_TC108954 | 1.17  | 0.04  | Up   | 1.27  | 0.07      |      | -1.03 | 0.36 |      | 1.12  | 0.12 |      | Expressed protein                                                         |      |
| Pc_TC108966 | -2.62 | 0.12  |      | 0.26  | 0.89      |      | -3.2  | 0.12 |      | -4.08 | 0.04 | Down | Expressed protein                                                         |      |
| Pc_TC108976 | -0.06 | 0.95  |      | 0.37  | 0.62      |      | -2.6  | 0.04 | Down | -2.87 | 0    | Down | Expressed protein                                                         |      |
| Pc_TC108980 | 1.79  | 0.04  | Up   | 0     | 0.02      |      | 1.63  | 0.22 |      | 0.28  | 0.86 |      | Expressed protein                                                         |      |
| Pc_TC109010 | -0.35 | 0.68  |      | 0     | 1         |      | -0.12 | 0.94 |      | -2.12 | 0.03 | Down | Expressed protein                                                         |      |
| Pc_TC109026 | -0.71 | 0.56  |      | 0.13  | 0.96      |      | 2.6   | 0.03 | Up   | 2.12  | 0.02 | Up   | Uncharacterized protein                                                   |      |
| Pc_TC109032 | 0.45  | 0.49  |      | 0.84  | 0.26      |      | -3.38 | 0.01 | Down | -1.45 | 0.09 |      | Expressed protein                                                         |      |
| Pc_TC109053 | -1.05 | 0.18  |      | -2.82 | 0.01      | Down | 0.05  | 0.98 |      | -2.94 | 0    | Down | Expressed protein                                                         |      |
| Pc_TC109054 | -3.41 | 0     | Down | 0     | 7.32E-005 |      | -2.53 | 0.07 |      | -3.87 | 0    | Down | Expressed protein                                                         |      |
| Pc_TC109068 | 0.33  | 0.51  |      | 1.17  | 0.04      | Up   | -2.81 | 0.01 | Down | -1.53 | 0.03 | Down | Expressed protein                                                         |      |
| Pc_TC109096 | 0.7   | 0.02  |      | 0.51  | 0.16      |      | -3.11 | 0    | Down | -0.85 | 0.08 |      | Expressed protein                                                         |      |
| Pc_TC109101 | -2.89 | 0     | Down | -4.5  | 0         | Down | 0.1   | 0.95 |      | -2.12 | 0.03 | Down | Expressed protein                                                         |      |
| Pc_TC109105 | -1.11 | 0.05  |      | -0.35 | 0.6       |      | 0.62  | 0.53 |      | -2.22 | 0    | Down | pleckstrin homology (PH) domain-containing protein                        |      |
| Pc_TC109106 | -1.54 | 0.02  | Down | 0.61  | 0.36      |      | -1.58 | 0.15 |      | -2.78 | 0    | Down | pleckstrin homology (PH) domain-containing protein                        |      |
| Pc_TC109107 | -0.09 | 0.9   |      | 1.36  | 0.03      | Up   | -1.06 | 0.33 |      | -1.74 | 0.02 | Down | pleckstrin homology (PH) domain-containing protein                        |      |
| Pc_TC109124 | 2.03  | 0.02  | Up   | 0     | 0.02      |      | 0.24  | 0.91 |      | -0.58 | 0.68 |      | aminopeptidase M1                                                         |      |
| Pc_TC109125 | -0.67 | 0.37  |      | 0.28  | 0.74      |      | 2.15  | 0.04 | Up   | 1.26  | 0.09 |      | Expressed protein                                                         |      |
| Pc_TC109141 | -2.12 | 0.02  | Down | -1.82 | 0.06      |      | -0.23 | 0.85 |      | 0.35  | 0.68 |      | ribulose biphosphate carboxylase small chain 1A                           |      |
| Pc_TC109171 | -0.12 | 0.86  |      | -1.59 | 0.05      | Down | -1.21 | 0.28 |      | -0.71 | 0.35 |      | Expressed protein                                                         |      |
| Pc_TC109172 | -1.61 | 0.03  | Down | -0.55 | 0.49      |      | 0.56  | 0.61 |      | 0.36  | 0.63 |      | Expressed protein                                                         |      |
| Pc_TC109197 | -0.79 | 0.41  |      | -0.14 | 0.92      |      | -4.45 | 0.01 | Down | -5.33 | 0    | Down | Expressed protein                                                         |      |
| Pc_TC109216 | -2.09 | 0.12  |      | -4.11 | 0.03      | Down | -1.5  | 0.35 |      | -0.54 | 0.67 |      | Expressed protein                                                         |      |
| Pc_TC109218 | 2.65  | ##### | Up   | 0     | 0         |      | 1.85  | 0.1  |      | 0.33  | 0.73 |      | cyclophilin 20-2                                                          |      |
| Pc_TC109220 | 0.04  | 0.96  |      | 1.03  | 0.11      |      | -2.94 | 0.01 | Down | -1.79 | 0.02 | Down | Uncharacterized protein                                                   |      |
| Pc_TC109222 | 1.59  | 0.03  | Up   | 0     | 0         |      | 1.06  | 0.38 |      | -0.61 | 0.55 |      | Uncharacterized protein                                                   | bZIP |
| Pc_TC109224 | -0.75 | 0.3   |      | 0.71  | 0.34      |      | -5.69 | 0    | Down | -2.98 | 0    | Down | Expressed protein                                                         |      |
| Pc_TC109237 | 0.52  | 0.1   |      | 0.74  | 0.06      |      | -2.94 | 0    | Down | -1.42 | 0.01 | Down | Expressed protein                                                         |      |
| Pc_TC109252 | 0.88  | 0.21  |      | -1.25 | 0.2       |      | 0.16  | 0.91 |      | -2.12 | 0.03 | Down | Expressed protein                                                         |      |
| Pc_TC109269 | 0.59  | 0.22  |      | 0.84  | 0.15      |      | -4.44 | 0    | Down | -2.01 | 0    | Down | Late embryogenesis abundant (LEA) hydroxyproline-rich glycoprotein family |      |
| Pc_TC109270 | 3.91  | ##### | Up   | 0     | 0.01      |      | 3.01  | 0.01 | Up   | 1.32  | 0.18 |      | Thymosin isoform 1                                                        |      |
| Pc_TC109271 | 2.53  | ##### | Up   | 0     | 2.64E-005 |      | 2.16  | 0.05 | Up   | -0.46 | 0.61 |      | Thymosin isoform 2                                                        |      |
| Pc_TC109272 | 2.74  | 0.05  | Up   | 0     | 0.48      |      | 1.38  | 0.56 |      | 1.21  | 0.58 |      | Expressed protein                                                         |      |
| Pc_TC109282 | 0.59  | 0.17  |      | 1.34  | 0.01      | Up   | -2.82 | 0.01 | Down | -0.79 | 0.2  |      | Expressed protein                                                         |      |
| Pc_TC109283 | 0.59  | 0.11  |      | 1.61  | 0         | Up   | -3.85 | 0    | Down | -1.16 | 0.04 | Down | plant glycogenin-like starch initiation protein 6                         |      |
| Pc_TC109287 | -3.68 | 0.01  | Down | -1.37 | 0.25      |      | -0.34 | 0.82 |      | -0.61 | 0.58 |      | Expressed protein                                                         |      |
| Pc_TC109289 | -2.12 | 0.02  | Down | -1.66 | 0.1       |      | -0.56 | 0.66 |      | -2.31 | 0.02 | Down | ADP/ATP carrier 2                                                         |      |
| Pc_TC109291 | -0.6  | 0.49  |      | -0.02 | 1         |      | 0     | 0    |      | -3.11 | 0.01 | Down | Expressed protein                                                         |      |
| Pc_TC109295 | 0.01  | 1     |      | -0.09 | 0.99      |      | 2.67  | 0.02 | Up   | 1.14  | 0.23 |      | Expressed protein                                                         |      |
| Pc_TC109311 | 1.68  | 0     | Up   | 0     | 7.52E-013 |      | 1.03  | 0.29 |      | -0.48 | 0.47 |      | Ribosomal protein L4/L1 family                                            |      |
| Pc_TC109312 | -0.12 | 0.95  |      | 0.86  | 0.39      |      | -4.02 | 0.03 | Down | -3.31 | 0.02 | Down | Expressed protein                                                         |      |
| Pc_TC109316 | 0.28  | 0.68  |      | 1.46  | 0.04      | Up   | -3.23 | 0.01 | Down | -2.76 | 0    | Down | Uncharacterized protein                                                   |      |
| Pc_TC109347 | -1.28 | 0.17  |      | -1.11 | 0.29      |      | -3.08 | 0.04 | Down | -2.22 | 0.04 | Down | Ribosomal protein S30 family protein                                      |      |

|             |       |       |      |       |           |      |       |           |      |       |       |      |                                                                               |
|-------------|-------|-------|------|-------|-----------|------|-------|-----------|------|-------|-------|------|-------------------------------------------------------------------------------|
| Pc_TC109358 | -2.83 | 0.02  | Down | 0     | 0         |      | -0.7  | 0.61      |      | -0.76 | 0.47  |      | Ribosomal L29e protein family                                                 |
| Pc_TC109409 | -0.63 | 0.32  |      | -1.65 | 0.04      | Down | -0.21 | 0.85      |      | -0.14 | 0.86  |      | Expressed protein                                                             |
| Pc_TC109412 | 0.43  | 0.59  |      | -0.18 | 0.88      |      | 2.15  | 0.05      |      | 1.84  | 0.02  | Up   | unknown protein                                                               |
| Pc_TC109417 | -2.24 | 0.04  | Down | -0.68 | 0.54      |      | 1.34  | 0.26      |      | 0.33  | 0.74  |      | Expressed protein                                                             |
| Pc_TC109418 | 0.11  | 0.91  |      | -0.04 | 1         |      | -1.35 | 0.29      |      | -2.34 | 0.02  | Down | Expressed protein                                                             |
| Pc_TC109428 | 1.15  | 0.1   |      | 2.41  | 0         | Up   | -3.23 | 0.03      | Down | 0     | 1     |      | Expressed protein                                                             |
| Pc_TC109450 | 0.49  | 0.4   |      | 1.31  | 0.04      | Up   | -2.77 | 0.02      | Down | -2.39 | 0     | Down | Uncharacterized protein (Fragment)                                            |
| Pc_TC109453 | -0.37 | 0.64  |      | 0.5   | 0.54      |      | -2.13 | 0.1       |      | -1.86 | 0.05  | Down | Expressed protein                                                             |
| Pc_TC109454 | 0.43  | 0.49  |      | 1.51  | 0.02      | Up   | -1.75 | 0.14      |      | 0.11  | 0.9   |      | Expressed protein                                                             |
| Pc_TC109467 | -2.05 | 0.02  | Down | -0.94 | 0.32      |      | 1.14  | 0.31      |      | 0.23  | 0.8   |      | Expressed protein                                                             |
| Pc_TC109495 | 0.45  | 0.49  |      | 0.55  | 0.46      |      | -2.85 | 0.02      | Down | -1.87 | 0.03  | Down | Putative UDP-N-acetylglucosamine--peptide N-acetylglucosaminyltransferase SEC |
| Pc_TC109496 | 0.33  | 0.59  |      | 0.53  | 0.45      |      | -3.75 | 0         | Down | -2.28 | 0.01  | Down | Uncharacterized protein                                                       |
| Pc_TC109500 | -2.64 | 0     | Down | -1.1  | 0.14      |      | 0.35  | 0.74      |      | -1.87 | 0.02  | Down | F-box family-3                                                                |
| Pc_TC109535 | -1.34 | 0.02  | Down | -0.95 | 0.16      |      | 0.69  | 0.48      |      | 0.03  | 0.97  |      | Protein of unknown function (DUF3414)                                         |
| Pc_TC109537 | -0.78 | 0.38  |      | -1.73 | 0.11      |      | 2.44  | 0.03      | Up   | 1.18  | 0.15  |      | Expressed protein                                                             |
| Pc_TC109544 | 6     | ##### | Up   | 0     | 0.11      |      | 4.02  | 0         | Up   | 1.58  | 0.19  |      | Expressed protein                                                             |
| Pc_TC109550 | 5.21  | 0     | Up   | 3.76  | 0.07      |      | 2.5   | 0.42      |      | 3.53  | 0.09  |      | Expressed protein                                                             |
| Pc_TC109551 | 0.54  | 0.22  |      | 0.5   | 0.36      |      | -3.08 | 0         | Down | -0.24 | 0.7   |      | Expressed protein                                                             |
| Pc_TC109556 | -1.42 | 0.06  |      | -0.52 | 0.53      |      | -1.89 | 0.12      |      | -1.87 | 0.03  | Down | Expressed protein                                                             |
| Pc_TC109561 | 0.93  | 0.02  |      | 1.47  | 0         | Up   | -3.78 | 0         | Down | -0.29 | 0.62  |      | Expressed protein                                                             |
| Pc_TC109564 | 1.18  | 0.05  |      | 1.76  | 0.01      | Up   | -1.57 | 0.19      |      | 0.22  | 0.78  |      | Expressed protein                                                             |
| Pc_TC109567 | -2.2  | 0.04  | Down | -4.03 | 0         | Down | -2.78 | 0.06      |      | 0     | ##### |      | Expressed protein                                                             |
| Pc_TC109568 | -2.01 | 0.01  | Down | -1.42 | 0.1       |      | 1.35  | 0.21      |      | -0.13 | 0.88  |      | Expressed protein                                                             |
| Pc_TC109587 | 2.5   | 0     | Up   | 0     | 0         |      | 2.17  | 0.07      |      | 0.17  | 0.9   |      | prohibitin 4                                                                  |
| Pc_TC109588 | -1.1  | 0.18  |      | 1.15  | 0.14      |      | -2.88 | 0.04      | Down | -2.27 | 0.02  | Down | Glutathione S-transferase family protein                                      |
| Pc_TC109589 | 0.25  | 0.7   |      | 1.39  | 0.04      | Up   | 0     | 1.14E-005 |      | -4.93 | ##### | Down | Expressed protein                                                             |
| Pc_TC109598 | -0.53 | 0.61  |      | -1.64 | 0.18      |      | 2.43  | 0.04      | Up   | 1.45  | 0.1   |      | Putative uncharacterized protein                                              |
| Pc_TC109623 | 1.76  | 0.01  | Up   | 0     | 4.05E-005 |      | 1.16  | 0.31      |      | -0.32 | 0.73  |      | Transketolase                                                                 |
| Pc_TC109628 | 1.26  | 0.14  |      | 1.81  | 0.05      | Up   | -1.16 | 0.46      |      | 0.8   | 0.43  |      | Expressed protein                                                             |
| Pc_TC109641 | -3.64 | 0     | Down | -3.99 | 0         | Down | -1.59 | 0.19      |      | -5.42 | ##### | Down | Expressed protein                                                             |
| Pc_TC109649 | 0.84  | 0.2   |      | -0.57 | 0.51      |      | 1.52  | 0.16      |      | 1.79  | 0.01  | Up   | Expressed protein                                                             |
| Pc_TC109650 | -0.99 | 0.07  |      | -3.68 | 2.51E-006 | Down | -0.28 | 0.78      |      | -0.14 | 0.83  |      | Expressed protein                                                             |
| Pc_TC109653 | 4.17  | 0.02  | Up   | 3.76  | 0.07      |      | 2.09  | 0.56      |      | 3.71  | 0.06  |      | Uncharacterized protein                                                       |
| Pc_TC109671 | -0.48 | 0.52  |      | 0.62  | 0.42      |      | -2.52 | 0.05      | Down | -1.9  | 0.03  | Down | Expressed protein                                                             |
| Pc_TC109677 | 0.38  | 0.51  |      | 1.09  | 0.09      |      | -4.63 | 0         | Down | -2.08 | 0.01  | Down | Expressed protein                                                             |
| Pc_TC109682 | -0.34 | 0.62  |      | -1.69 | 0.05      | Down | -0.53 | 0.64      |      | -0.51 | 0.52  |      | Expressed protein                                                             |
| Pc_TC109692 | 0.05  | 0.93  |      | 0.92  | 0.11      |      | -2.23 | 0.04      | Down | -1.05 | 0.12  |      | Uncharacterized protein                                                       |
| Pc_TC109725 | 0     | 1     |      | 1.19  | 0.15      |      | 0     | 0         |      | -3.96 | 0     | Down | Expressed protein                                                             |
| Pc_TC109750 | 0.57  | 0.45  |      | -0.2  | 0.85      |      | 1.54  | 0.17      |      | 1.55  | 0.05  | Up   | Expressed protein                                                             |
| Pc_TC109757 | -1.15 | 0.02  | Down | -1.1  | 0.07      |      | 1.45  | 0.12      |      | 0.23  | 0.7   |      | Expressed protein                                                             |
| Pc_TC109768 | -0.15 | 0.84  |      | 0.11  | 0.9       |      | -2.96 | 0.02      | Down | -2.05 | 0.02  | Down | Expressed protein                                                             |
| Pc_TC109778 | -3.02 | 0     | Down | -2.15 | 0.03      | Down | 1.9   | 0.08      |      | 0.3   | 0.72  |      | Expressed protein                                                             |
| Pc_TC109782 | -0.76 | 0.41  |      | -2.71 | 0.03      | Down | 1     | 0.4       |      | 0.4   | 0.68  |      | Expressed protein                                                             |
| Pc_TC109785 | 0.1   | 0.81  |      | 0     | 1         |      | -1.98 | 0.04      | Down | -1.08 | 0.07  |      | Expressed protein                                                             |
| Pc_TC109796 | 0.54  | 0.31  |      | 0.37  | 0.57      |      | -1.39 | 0.2       |      | -1.94 | 0.01  | Down | Expressed protein                                                             |
| Pc_TC109808 | 3.69  | ##### | Up   | 0     | 0.02      |      | 2.63  | 0.04      | Up   | 2.39  | 0.01  | Up   | Expressed protein                                                             |
| Pc_TC109809 | 0.55  | 0.41  |      | 0.54  | 0.48      |      | -4.04 | 0         | Down | -3.92 | 0     | Down | Expressed protein                                                             |
| Pc_TC109815 | 1.54  | 0.02  | Up   | 2.09  | 0.01      | Up   | -0.68 | 0.6       |      | 1.45  | 0.07  |      | Predicted CDS Pa 5 4660                                                       |
| Pc_TC109817 | 0.19  | 0.77  |      | 0.06  | 0.95      |      | -3.15 | 0.01      | Down | -2.44 | 0     | Down | Notch-like protein                                                            |
| Pc_TC109863 | 2.49  | 0     | Up   | 0     | 0         |      | 1.43  | 0.25      |      | 0.29  | 0.8   |      | Expressed protein                                                             |
| Pc_TC109866 | -1.37 | 0.03  | Down | -1.6  | 0.03      | Down | -1.96 | 0.08      |      | -2.03 | 0.01  | Down | Expressed protein                                                             |
| Pc_TC109873 | 3.12  | ##### | Up   | 0     | 6.86E-006 |      | 3.42  | 0         | Up   | 1.74  | 0.02  | Up   | Serine protease inhibitor (SERPIN) family protein                             |
| Pc_TC109887 | -0.22 | 0.82  |      | -2.57 | 0.03      | Down | 0.94  | 0.43      |      | 0.42  | 0.65  |      | Expressed protein                                                             |
| Pc_TC109895 | -1.78 | 0.05  | Down | 0.28  | 0.76      |      | 0.5   | 0.67      |      | -1.17 | 0.21  |      | Expressed protein                                                             |
| Pc_TC109897 | 4.83  | 0     | Up   | 0     | 1         |      | 3.09  | 0.24      |      | 2.21  | 0.47  |      | Expressed protein                                                             |
| Pc_TC109908 | 0.1   | 0.91  |      | 0.67  | 0.39      |      | -3.01 | 0.02      | Down | -3.35 | 0     | Down | Expressed protein                                                             |
| Pc_TC109920 | -1.16 | 0.27  |      | -0.83 | 0.47      |      | -1.88 | 0.21      |      | -5.08 | 0     | Down | myosin,putative                                                               |
| Pc_TC109943 | 0.08  | 1     |      | 2.06  | 0.24      |      | 3.34  | 0.04      | Up   | 3.08  | 0.02  | Up   | Uncharacterized protein                                                       |
| Pc_TC109961 | 0.35  | 0.62  |      | -0.06 | 0.96      |      | -2.8  | 0.03      | Down | -0.62 | 0.47  |      | Cryptocephal                                                                  |
| Pc_TC109962 | 1.83  | 0.01  | Up   | 0     | 9.94E-005 |      | 1.88  | 0.09      |      | 0.24  | 0.8   |      | Expressed protein                                                             |
| Pc_TC109967 | 0.11  | 0.91  |      | 1.47  | 0.06      |      | -3.4  | 0.02      | Down | -1.06 | 0.26  |      | similar to RCD one 3                                                          |
| Pc_TC109982 | -3.51 | ##### | Down | -3.2  | 0         | Down | 1.73  | 0.1       |      | 0.49  | 0.5   |      | Expressed protein                                                             |

|             |       |       |      |        |           |      |      |       |           |      |       |       |      |                                                                                 |
|-------------|-------|-------|------|--------|-----------|------|------|-------|-----------|------|-------|-------|------|---------------------------------------------------------------------------------|
| Pc_TC109987 | 0.18  | 0.84  |      |        | -2.26     | 0.04 | Down | 0.11  | 0.95      |      | -0.24 | 0.82  |      | Expressed protein                                                               |
| Pc_TC109996 | 1.83  | 0     | Up   | 0      | 1.76E-006 |      |      | 1.55  | 0.15      |      | -0.22 | 0.79  |      | Ribosomal protein L22p/L17e family protein                                      |
| Pc_TC110001 | -0.01 | 1     |      | 0.67   | 0.56      |      |      | -3.58 | 0.07      |      | -3.46 | 0.03  | Down | Expressed protein                                                               |
| Pc_TC110012 | -2.62 | 0.03  | Down | -0.25  | 0.85      |      |      | 0.5   | 0.71      |      | -1.62 | 0.16  |      | putative Ty1-copia subclass                                                     |
| Pc_TC110015 | -3.73 | 0.05  | Down | 0      | 0.02      |      |      | -0.98 | 0.57      |      | -2.18 | 0.15  |      | Uncharacterized protein                                                         |
| Pc_TC110018 | 0.38  | 0.52  |      | 0.27   | 0.71      |      |      | -2.44 | 0.04      | Down | -0.79 | 0.29  |      | UniRef100                                                                       |
| Pc_TC110019 | 0     | 0     |      | -4.26  | 0.02      | Down |      | 0     | 0.01      |      | -1.53 | 0.22  |      | Uncharacterized protein (Fragment)                                              |
| Pc_TC110042 | 0.08  | 0.95  |      | 1.13   | 0.15      |      |      | -2.27 | 0.09      |      | -4.37 | 0     | Down | Expressed protein                                                               |
| Pc_TC110046 | 1.04  | 0.02  | Up   | 1.76   | 0         | Up   |      | -3.67 | 0         | Down | -0.23 | 0.72  |      | Uncharacterized protein                                                         |
| Pc_TC110052 | 2.46  | 0.01  | Up   | 0      | 0.09      |      |      | 2.58  | 0.06      |      | 2.26  | 0.03  | Up   | uncharacterized protein                                                         |
| Pc_TC110085 | 4.06  | ##### | Up   | 0      | 0.11      |      |      | 1.63  | 0.28      |      | -1.05 | 0.58  |      | putative Ty1-copia subclass                                                     |
| Pc_TC110098 | 0.27  | 0.45  |      | -10.43 | 4.30E-028 | Down |      | 0.19  | 0.82      |      | -0.92 | 0.09  |      | cytochrome oxidase                                                              |
| Pc_TC110100 | -4.09 | 0.02  | Down | -1.79  | 0.22      |      |      | -0.86 | 0.59      |      | -1.37 | 0.29  |      | Expressed protein                                                               |
| Pc_TC110103 | -1.06 | 0.22  |      | 0      | 8.53E-005 |      |      | -0.1  | 0.95      |      | -3.51 | 0     | Down | Expressed protein                                                               |
| Pc_TC110111 | 0.53  | 0.7   |      | 2.24   | 0.03      | Up   |      | 0     | 0.04      |      | 0     | 0.02  |      | Expressed protein                                                               |
| Pc_TC110115 | 2.99  | 0     | Up   | 0      | 0.07      |      |      | 2.33  | 0.09      |      | 1.43  | 0.21  |      | Expressed protein                                                               |
| Pc_TC110119 | -2.8  | 0.04  | Down | -0.49  | 0.7       |      |      | -0.37 | 0.82      |      | -0.37 | 0.76  |      | Expressed protein                                                               |
| Pc_TC110126 | 2.28  | 0     | Up   | 0      | 0.01      |      |      | 1.83  | 0.15      |      | 1.35  | 0.17  |      | ATPase,F1 complex,gamma subunit protein                                         |
| Pc_TC110128 | 1.42  | 0.02  | Up   | 0      | 4.68E-006 |      |      | 2.21  | 0.04      | Up   | 1.22  | 0.1   |      | Actin binding Calponin homology (CH) domain-containing protein                  |
| Pc_TC110144 | -0.22 | 0.91  |      | -0.48  | 0.75      |      |      | -2.91 | 0.12      |      | -4.37 | 0.02  | Down | Expressed protein                                                               |
| Pc_TC110148 | 1.52  | 0     | Up   | 0      | 7.62E-016 |      |      | 1.73  | 0.06      |      | 1.3   | 0.03  | Up   | Expressed protein                                                               |
| Pc_TC110150 | 1.65  | 0.01  | Up   | 0      | 4.05E-005 |      |      | 1.02  | 0.37      |      | -0.78 | 0.39  |      | Ribosomal protein L7Ae/L30e/S12e/Gadd45 family protein                          |
| Pc_TC110164 | -0.2  | 0.78  |      | 0.43   | 0.56      |      |      | -2.85 | 0.02      | Down | -2.2  | 0.01  | Down | Expressed protein                                                               |
| Pc_TC110188 | 0.05  | 0.99  |      | 0.98   | 0.23      |      |      | -3.4  | 0.02      | Down | -0.28 | 0.77  |      | Citrate synthase                                                                |
| Pc_TC110189 | -0.54 | 0.52  |      | 1.13   | 0.15      |      |      | -4.44 | 0.01      | Down | -2.58 | 0.01  | Down | Expressed protein                                                               |
| Pc_TC110201 | 0.13  | 0.88  |      | 1.49   | 0.04      | Up   |      | -2.55 | 0.05      |      | -1.77 | 0.06  |      | Expressed protein                                                               |
| Pc_TC110204 | 0.17  | 0.67  |      | 0.14   | 0.78      |      |      | -6.01 | 3.82E-007 | Down | -2.78 | ##### | Down | Expressed protein                                                               |
| Pc_TC110214 | -0.23 | 0.83  |      | -0.73  | 0.51      |      |      | 2.3   | 0.04      | Up   | 1.18  | 0.17  |      | Expressed protein                                                               |
| Pc_TC110227 | -1.7  | 0.05  |      | 1.53   | 0.04      | Up   |      | -3.27 | 0.02      | Down | -1.96 | 0.05  | Down | heat shock protein 70B                                                          |
| Pc_TC110228 | -0.4  | 0.53  |      | -0.37  | 0.62      |      |      | -1.43 | 0.2       |      | -1.55 | 0.05  | Down | Uncharacterized protein                                                         |
| Pc_TC110231 | 0.22  | 0.79  |      | 1.83   | 0.01      | Up   |      | -2.47 | 0.07      |      | -2.93 | 0.01  | Down | Expressed protein                                                               |
| Pc_TC110238 | 1.72  | 0.04  | Up   | 0      | 0.02      |      |      | 1.65  | 0.2       |      | -0.37 | 0.8   |      | Expressed protein                                                               |
| Pc_TC110265 | 3.25  | 0.14  |      | 4.96   | 0         | Up   |      | 1.5   | 0.78      |      | 1.63  | 0.71  |      | Putative uncharacterized protein Sb06g002621                                    |
| Pc_TC110270 | -0.61 | 0.39  |      | -2.1   | 0.02      | Down |      | 2.38  | 0.02      | Up   | 0.75  | 0.32  |      | Uncharacterized protein                                                         |
| Pc_TC110288 | -1.61 | 0.01  | Down | -2.11  | 0         | Down |      | -0.68 | 0.52      |      | -0.98 | 0.17  |      | BED zinc finger ;hAT family dimerisation domain                                 |
| Pc_TC110290 | 0.33  | 0.73  |      | 1.7    | 0.05      | Up   |      | 0.66  | 0.61      |      | 0.17  | 0.89  |      | Expressed protein                                                               |
| Pc_TC110305 | -1.3  | 0.22  |      | 0.26   | 0.82      |      |      | 0     | 0         |      | -2.49 | 0.04  | Down | Expressed protein                                                               |
| Pc_TC110306 | 0.18  | 0.76  |      | 0.43   | 0.53      |      |      | -2.52 | 0.03      | Down | -1.21 | 0.11  |      | Expressed protein                                                               |
| Pc_TC110319 | 1.17  | 0.1   |      | 1.63   | 0.04      | Up   |      | -3.16 | 0.03      | Down | -3.3  | 0.01  | Down | CHY-type/CTCHY-type/RING-type Zinc finger protein                               |
| Pc_TC110326 | 0.26  | 0.69  |      | 1.09   | 0.12      |      |      | -2.18 | 0.07      |      | -1.78 | 0.03  | Down | Expressed protein                                                               |
| Pc_TC110331 | 0.01  | 1     |      | 0.66   | 0.27      |      |      | -2.05 | 0.06      |      | -1.76 | 0.01  | Down | Expressed protein                                                               |
| Pc_TC110340 | 0.08  | 1     |      | 0.47   | 0.86      |      |      | 2.87  | 0.05      | Up   | 1.43  | 0.3   |      | Expressed protein                                                               |
| Pc_TC110348 | 1.42  | 0.12  |      | 0.74   | 0.53      |      |      | -4.4  | 0.05      | Down | -0.96 | 0.48  |      | Expressed protein                                                               |
| Pc_TC110438 | 2.39  | 0     | Up   | 0      | 0         |      |      | 1.52  | 0.18      |      | 0.26  | 0.79  |      | GDP dissociation inhibitor family protein / Rab GTPase activator family protein |
| Pc_TC110444 | -2.29 | 0.04  | Down | -2.9   | 0.03      | Down |      | -4.45 | 0.01      | Down | -2.33 | 0.04  | Down | Expressed protein                                                               |
| Pc_TC110452 | -2.76 | 0     | Down | -1.5   | 0.13      |      |      | -2.82 | 0.04      | Down | -1.85 | 0.06  |      | GTP binding Elongation factor Tu family protein                                 |
| Pc_TC110463 | -0.3  | 0.72  |      | -2.2   | 0.04      | Down |      | 0.01  | 1         |      | -3.15 | 0     | Down | DNase I-like superfamily protein                                                |
| Pc_TC110473 | 0.76  | 0.55  |      | 0.06   | 1         |      |      | 1.91  | 0.17      |      | 2.08  | 0.05  | Up   | Expressed protein                                                               |
| Pc_TC110489 | 2.14  | 0.02  | Up   | 0      | 0.04      |      |      | 1.59  | 0.25      |      | 0.95  | 0.42  |      | Expressed protein                                                               |
| Pc_TC110510 | -2.2  | 0.04  | Down | -0.27  | 0.81      |      |      | 0.81  | 0.51      |      | -2.88 | 0.01  | Down | geminivirus rep interacting kinase 2                                            |
| Pc_TC110511 | -1.4  | 0.03  | Down | -1.23  | 0.1       |      |      | 0.38  | 0.72      |      | -0.46 | 0.53  |      | geminivirus rep interacting kinase 2                                            |
| Pc_TC110530 | 3.95  | 0     | Up   | 0      | 0.48      |      |      | 2.96  | 0.09      |      | 1.36  | 0.5   |      | 20S proteasome alpha subunit C1                                                 |
| Pc_TC110548 | 0.5   | 0.47  |      | 1.6    | 0.03      | Up   |      | 0.75  | 0.51      |      | 0.17  | 0.85  |      | glucan synthase-like 10                                                         |
| Pc_TC110555 | -0.88 | 0.35  |      | 0.37   | 0.71      |      |      | 0     | 0         |      | -4.42 | 0     | Down | Uncharacterized protein                                                         |
| Pc_TC110571 | -1.42 | 0.28  |      | -1.22  | 0.39      |      |      | -2.58 | 0.14      |      | -3.46 | 0.03  | Down | Expressed protein                                                               |
| Pc_TC110572 | 3.19  | 0     | Up   | 0      | 0.11      |      |      | 1.75  | 0.24      |      | -0.37 | 0.89  |      | Expressed protein                                                               |
| Pc_TC110573 | -0.14 | 0.89  |      | 0.82   | 0.33      |      |      | -5.89 | 0         | Down | -0.34 | 0.72  |      | Haloacid dehalogenase-like hydrolase (HAD) superfamily protein                  |
| Pc_TC110578 | 2.21  | 0.01  | Up   | 0      | 0.02      |      |      | 1.15  | 0.4       |      | -0.79 | 0.55  |      | FUS3-complementing gene 2                                                       |
| Pc_TC110582 | 0.52  | 0.57  |      | 0.97   | 0.31      |      |      | -3.56 | 0.04      | Down | -3.02 | 0.02  | Down | Expressed protein                                                               |
| Pc_TC110593 | -3.09 | 0.01  | Down | -5.11  | 0         | Down |      | 1.66  | 0.15      |      | 0.58  | 0.51  |      | Os08g0112000 protein                                                            |
| Pc_TC110596 | -3.92 | 0     | Down | -2.36  | 0.05      |      |      | -1.04 | 0.45      |      | -2.79 | 0.02  | Down | Expressed protein                                                               |
| Pc_TC110614 | 0.17  | 0.88  |      | 0.24   | 0.83      |      |      | -2.4  | 0.11      |      | -2.7  | 0.03  | Down | Expressed protein                                                               |



|             |       |       |      |       |           |      |       |           |       |       |       |                                                         |                                                               |
|-------------|-------|-------|------|-------|-----------|------|-------|-----------|-------|-------|-------|---------------------------------------------------------|---------------------------------------------------------------|
| Pc_TC110633 | 0.69  | 0.35  |      | 0.67  | 0.44      |      | -0.03 | 1         | 1.81  | 0.02  | Up    | Uncharacterized protein (Fragment)                      |                                                               |
| Pc_TC110648 | -3.66 | 0     | Down | -2.68 | 0.02      | Down | 0     | 0         | -4.7  | 0     | Down  | Expressed protein                                       |                                                               |
| Pc_TC110652 | 0.56  | 0.05  |      | 0.22  | 0.56      |      | -1.38 | 0.1       | -1.13 | 0.02  | Down  | cytochrome P450, family 71, subfamily A, polypeptide 23 |                                                               |
| Pc_TC110655 | -1.12 | 0.19  |      | 0.49  | 0.57      |      | -2.85 | 0.04      | Down  | -1.9  | 0.06  | Os01g0598400 protein                                    |                                                               |
| Pc_TC110659 | -1.51 | 0.05  | Down | -0.32 | 0.7       |      | 0.67  | 0.54      |       | -0.51 | 0.53  | Putative transposon protein                             |                                                               |
| Pc_TC110661 | -0.58 | 0.63  |      | -0.1  | 0.98      |      | 1.09  | 0.41      |       | 2.02  | 0.02  | Up                                                      | Putative transposon protein                                   |
| Pc_TC110662 | -0.73 | 0.53  |      | -1.53 | 0.25      |      | 3.19  | 0.01      | Up    | 1.26  | 0.18  | Expressed protein                                       |                                                               |
| Pc_TC110664 | 0.98  | 0.25  |      | -0.07 | 0.99      |      | 4.04  | 0         | Up    | 2.06  | 0.02  | Up                                                      | Putative transposon protein                                   |
| Pc_TC110665 | -0.33 | 0.59  |      | -4.56 | 2.32E-006 | Down | 1.85  | 0.07      |       | -0.15 | 0.84  | Putative transposon protein                             |                                                               |
| Pc_TC110666 | 0     | 1     |      | 0.35  | 0.79      |      | 4.98  | 2.24E-005 | Up    | 3.78  | ##### | Up                                                      | Putative transposon protein                                   |
| Pc_TC110667 | 2.38  | 0.01  | Up   | 2.15  | 0.03      | Up   | 4.57  | 0         | Up    | 2.82  | 0     | Up                                                      | Expressed protein                                             |
| Pc_TC110686 | 1.58  | 0.06  |      | 2.33  | 0.01      | Up   | -2.67 | 0.13      |       | -1.22 | 0.34  | Expressed protein                                       |                                                               |
| Pc_TC110727 | 0.08  | 0.92  |      | -2.87 | 0         | Down | 0.71  | 0.51      |       | 0.24  | 0.75  | Uncharacterized protein                                 |                                                               |
| Pc_TC110734 | 1.08  | 0.65  |      | 1.8   | 0.35      |      | 2.5   | 0.17      |       | 3.08  | 0.02  | Up                                                      | Expressed protein                                             |
| Pc_TC110747 | 0.76  | 0.38  |      | 0.74  | 0.45      |      | -5.14 | 0.01      | Down  | -0.56 | 0.62  | Expressed protein                                       |                                                               |
| Pc_TC110764 | -0.24 | 0.9   |      | 0.4   | 0.78      |      | -4.4  | 0.05      | Down  | -2.7  | 0.09  | Expressed protein                                       |                                                               |
| Pc_TC110765 | 0.8   | 0.24  |      | 0.68  | 0.4       |      | -5.25 | 0         | Down  | -1.18 | 0.19  | OSINBa0013K16.13 protein                                |                                                               |
| Pc_TC110772 | -0.67 | 0.48  |      | 0.19  | 0.87      |      | -1.04 | 0.45      |       | -4.37 | 0     | Down                                                    | Expressed protein                                             |
| Pc_TC110779 | -2.19 | 0.05  | Down | 0.29  | 0.79      |      | -1.45 | 0.31      |       | -1.43 | 0.19  | Putative uncharacterized protein                        |                                                               |
| Pc_TC110796 | 2.11  | 0.03  | Up   | 1.78  | 0.11      |      | -0.23 | 0.95      |       | 1.3   | 0.26  | Expressed protein                                       |                                                               |
| Pc_TC110806 | 0.4   | 0.49  |      | 0.83  | 0.21      |      | -3.48 | 0         | Down  | -2.58 | 0     | Down                                                    | Expressed protein                                             |
| Pc_TC110813 | 0.15  | 0.93  |      | 1.02  | 0.32      |      | -1.16 | 0.46      |       | -3.04 | 0.04  | Down                                                    | Putative uncharacterized protein Sb05g004860                  |
| Pc_TC110846 | 0.37  | 0.34  |      | 0.41  | 0.4       |      | -3.44 | 0         | Down  | -1.99 | 0     | Down                                                    | Expressed protein                                             |
| Pc_TC110847 | 0.08  | 0.97  |      | 1.25  | 0.16      |      | -2.13 | 0.15      |       | -2.37 | 0.05  | Down                                                    | Expressed protein                                             |
| Pc_TC110854 | 0.76  | 0.71  |      | 1.98  | 0.16      |      | 2.83  | 0.06      |       | 3.43  | 0     | Up                                                      | pentatricopeptide (PPR) repeat-containing protein             |
| Pc_TC110855 | -2.14 | 0.03  | Down | -0.87 | 0.38      |      | 0.2   | 0.89      |       | -0.6  | 0.53  | pentatricopeptide (PPR) repeat-containing protein       |                                                               |
| Pc_TC110856 | -0.14 | 0.76  |      | 0.06  | 0.92      |      | -3.51 | 0         | Down  | -1.54 | 0.02  | Down                                                    | Expressed protein                                             |
| Pc_TC110871 | -2.51 | 0.01  | Down | -2.53 | 0.03      | Down | 1.12  | 0.33      |       | 0.01  | 1     | Expressed protein                                       |                                                               |
| Pc_TC110875 | -0.45 | 0.59  |      | -2.47 | 0.02      | Down | -0.85 | 0.5       |       | -0.77 | 0.41  | Uncharacterized protein                                 |                                                               |
| Pc_TC110881 | 0.14  | 0.93  |      | 0.06  | 1         |      | -3.96 | 0.03      | Down  | -2.25 | 0.08  | Expressed protein                                       |                                                               |
| Pc_TC110885 | -1.12 | 0.31  |      | 0.89  | 0.36      |      | -4.02 | 0.03      | Down  | -2.09 | 0.09  | Uncharacterized protein                                 |                                                               |
| Pc_TC110893 | -0.24 | 0.87  |      | -0.26 | 0.87      |      | -3.82 | 0.04      | Down  | 0     | 0     | Expressed protein                                       |                                                               |
| Pc_TC110897 | 1.4   | 0.09  |      | 2.39  | 0.01      | Up   | -2.23 | 0.17      |       | -0.79 | 0.51  | Expressed protein                                       |                                                               |
| Pc_TC110908 | 0.03  | 1     |      | 0.67  | 0.47      |      | -1.4  | 0.32      |       | -2.7  | 0.03  | Down                                                    | Expressed protein                                             |
| Pc_TC110924 | 0.48  | 0.19  |      | 0.19  | 0.69      |      | -3.33 | 0         | Down  | -1.76 | 0     | Down                                                    | Expressed protein                                             |
| Pc_TC110931 | -1.85 | 0.15  |      | -3.19 | 0.05      |      | -3.16 | 0.08      |       | -3.62 | 0.02  | Down                                                    | Expressed protein                                             |
| Pc_TC110946 | 0.15  | 0.93  |      | 0.82  | 0.43      |      | -2.01 | 0.21      |       | -3.7  | 0.02  | Down                                                    | Expressed protein                                             |
| Pc_TC110959 | -0.34 | 0.64  |      | 0.83  | 0.25      |      | -3.36 | 0.01      | Down  | -1.41 | 0.09  | Uncharacterized                                         |                                                               |
| Pc_TC110962 | -0.46 | 0.65  |      | -0.48 | 0.67      |      | 2.46  | 0.03      | Up    | 1.41  | 0.1   | Expressed protein                                       |                                                               |
| Pc_TC110964 | -0.9  | 0.23  |      | -2.64 | 0.01      | Down | 1.5   | 0.17      |       | 0.91  | 0.23  | Expressed protein                                       |                                                               |
| Pc_TC110970 | 0.09  | 0.9   |      | -0.24 | 0.76      |      | -4.25 | 0         | Down  | -1.27 | 0.11  | Expressed protein                                       |                                                               |
| Pc_TC110975 | 1.01  | 0.13  |      | -0.5  | 0.59      |      | 3.44  | 0         | Up    | 1.25  | 0.11  | cysteine-rich RLK (RECEPTOR-like protein kinase) 8      |                                                               |
| Pc_TC110979 | 0.22  | 0.7   |      | 0.12  | 0.87      |      | -3.37 | 0         | Down  | -0.6  | 0.4   | Expressed protein                                       |                                                               |
| Pc_TC110984 | -0.73 | 0.76  |      | 1.25  | 0.38      |      | 2.8   | 0.05      | Up    | 2.21  | 0.05  | Expressed protein                                       |                                                               |
| Pc_TC110995 | 2.47  | ##### | Up   | 0     | 6.30E-005 |      | 1.66  | 0.14      |       | 0.64  | 0.44  | starch branching enzyme 2.2                             |                                                               |
| Pc_TC110997 | -1.76 | 0.06  |      | -1.46 | 0.15      |      | -1.28 | 0.32      |       | -2.22 | 0.03  | Down                                                    | Expressed protein                                             |
| Pc_TC111013 | 0.23  | 0.68  |      | 0.32  | 0.63      |      | -3.01 | 0.01      | Down  | -1.6  | 0.03  | Down                                                    | Expressed protein                                             |
| Pc_TC111025 | 1.59  | 0.01  | Up   | 0     | 4.05E-005 |      | 1.85  | 0.09      |       | 0.52  | 0.54  | inositol transporter 1                                  |                                                               |
| Pc_TC111036 | 0.38  | 0.3   |      | 1.03  | 0.02      | Up   | -2.58 | 0.01      | Down  | -1.13 | 0.05  | Down                                                    | Expressed protein                                             |
| Pc_TC111050 | 0.16  | 0.82  |      | 0.85  | 0.24      |      | -3.41 | 0.01      | Down  | -3.94 | 0     | Down                                                    | Uncharacterized protein                                       |
| Pc_TC111051 | 1.64  | 0.02  | Up   | 1.11  | 0.18      |      | 0.96  | 0.42      |       | 1.96  | 0.01  | Up                                                      | Protein kinase family protein with leucine-rich repeat domain |
| Pc_TC111057 | -0.62 | 0.55  |      | -0.47 | 0.69      |      | -3.2  | 0.05      |       | -2.49 | 0.04  | Down                                                    | Expressed protein                                             |
| Pc_TC111063 | 1.3   | 0     | Up   | 0.33  | 0.54      |      | 0.85  | 0.36      |       | 1.95  | 0     | Up                                                      | Expressed protein                                             |
| Pc_TC111075 | -0.46 | 0.42  |      | -2.5  | 0         | Down | 1.97  | 0.04      | Up    | 1.35  | 0.03  | Up                                                      | Leucine-rich repeat protein kinase family protein             |
| Pc_TC111087 | -1.95 | 0.03  | Down | -3.56 | 0         | Down | -5.11 | 0         | Down  | -3.18 | 0     | Down                                                    | Ribosomal protein L6 family                                   |
| Pc_TC111098 | 2.01  | 0     | Up   | 1.76  | 0.02      | Up   | -2.43 | 0.08      |       | 2.16  | 0     | Up                                                      | Expressed protein                                             |
| Pc_TC111100 | 0     | 1     |      | -1.82 | 0.03      | Down | 1.52  | 0.15      |       | 0.19  | 0.81  | Expressed protein                                       |                                                               |
| Pc_TC111106 | 0.08  | 0.92  |      | -2.22 | 0.01      | Down | -0.77 | 0.49      |       | -0.85 | 0.28  | receptor-like kinase 902                                |                                                               |
| Pc_TC111107 | -0.23 | 0.71  |      | -1.43 | 0.06      |      | -0.17 | 0.88      |       | -2.03 | 0.01  | Down                                                    | receptor-like kinase 902                                      |
| Pc_TC111108 | 0.74  | 0.39  |      | 2.03  | 0.02      | Up   | 1.36  | 0.26      |       | 0.38  | 0.71  | receptor-like kinase 902                                |                                                               |
| Pc_TC111110 | -0.96 | 0.09  |      | -2.79 | 0         | Down | -0.09 | 0.93      |       | -0.34 | 0.62  | Leucine-rich repeat protein kinase family protein       |                                                               |
| Pc_TC111119 | -1.64 | 0.01  | Down | -1.77 | 0.02      | Down | 2.32  | 0.02      | Up    | 0.44  | 0.52  | Expressed protein                                       |                                                               |

|             |       |       |      |       |           |      |       |      |      |       |       |      |                                               |
|-------------|-------|-------|------|-------|-----------|------|-------|------|------|-------|-------|------|-----------------------------------------------|
| Pc_TC111122 | 0.9   | 0.2   |      | 0.35  | 0.7       |      | 0.66  | 0.58 |      | 1.53  | 0.05  | Up   | Expressed protein                             |
| Pc_TC111128 | 1.08  | 0.22  |      | 2.1   | 0.02      | Up   | -0.74 | 0.63 |      | -0.3  | 0.83  |      | Expressed protein                             |
| Pc_TC111131 | -0.98 | 0.23  |      | -0.78 | 0.4       |      | 2.21  | 0.04 | Up   | 1.08  | 0.17  |      | Expressed protein                             |
| Pc_TC111138 | 0.63  | 0.31  |      | 1.03  | 0.14      |      | -2.15 | 0.07 |      | -2.44 | 0.01  | Down | Uncharacterized protein                       |
| Pc_TC111162 | 0.88  | 0.22  |      | -0.2  | 0.85      |      | 2.67  | 0.02 | Up   | 0.22  | 0.82  |      | Putative uncharacterized protein              |
| Pc_TC111165 | 0.31  | 0.69  |      | -1.47 | 0.14      |      | 2.45  | 0.03 | Up   | 1.75  | 0.02  | Up   | Expressed protein                             |
| Pc_TC111167 | 0.41  | 0.58  |      | 0.54  | 0.52      |      | 0     | 0    |      | -2.73 | 0.01  | Down | Expressed protein                             |
| Pc_TC111186 | 2.1   | ##### | Up   | 0     | 3.60E-008 |      | 1.75  | 0.09 |      | 0.09  | 0.91  |      | vacuolar ATP synthase subunit E1              |
| Pc_TC111189 | 0.6   | 0.1   |      | 0.47  | 0.32      |      | -2.17 | 0.02 | Down | 0.08  | 0.88  |      | Expressed protein                             |
| Pc_TC111199 | -3.73 | 0.01  | Down | -3.75 | 0.01      | Down | -0.84 | 0.55 |      | -1.37 | 0.21  |      | Expressed protein                             |
| Pc_TC111210 | 0.39  | 0.69  |      | 0.37  | 0.74      |      | -2.14 | 0.16 |      | -3.02 | 0.02  | Down | Expressed protein                             |
| Pc_TC111215 | -1.78 | 0.01  | Down | -0.03 | 0.98      |      | -0.45 | 0.68 |      | -0.33 | 0.65  |      | embryo defective 3012                         |
| Pc_TC111239 | -0.52 | 0.46  |      | 1.33  | 0.06      |      | -2.36 | 0.06 |      | -2.11 | 0.02  | Down | Heat shock protein 70 (Hsp 70) family protein |
| Pc_TC111243 | -0.86 | 0.29  |      | 0.74  | 0.37      |      | 0     | 0    |      | -5.02 | 0     | Down | Expressed protein                             |
| Pc_TC111251 | 0.27  | 0.71  |      | 0.43  | 0.59      |      | -1.52 | 0.21 |      | -1.81 | 0.04  | Down | Expressed protein                             |
| Pc_TC111254 | 0.22  | 0.83  |      | 0.06  | 0.99      |      | -2.55 | 0.09 |      | -2.65 | 0.03  | Down | Expressed protein                             |
| Pc_TC111269 | 0.19  | 0.87  |      | 0.9   | 0.35      |      | -1.38 | 0.35 |      | -2.64 | 0.04  | Down | Expressed protein                             |
| Pc_TC111271 | 0.45  | 0.49  |      | -2.91 | 0         | Down | 0.68  | 0.54 |      | 1.29  | 0.07  |      | Expressed protein                             |
| Pc_TC111273 | 1.54  | 0     | Up   | 0     | 1.72E-008 |      | 1.34  | 0.19 |      | -0.03 | 0.98  |      | Ribosomal protein L34e superfamily protein    |
| Pc_TC111278 | -0.41 | 0.74  |      | -0.75 | 0.56      |      | -1.72 | 0.27 |      | -4.77 | 0.01  | Down | Expressed protein                             |
| Pc_TC111284 | -0.57 | 0.49  |      | 1.24  | 0.11      |      | -4.05 | 0.01 | Down | -1.34 | 0.16  |      | Expressed protein                             |
| Pc_TC111307 | 0.41  | 0.58  |      | -0.76 | 0.41      |      | -3.17 | 0.02 | Down | -1.96 | 0.04  | Down | Ribonuclease H-like superfamily protein       |
| Pc_TC111313 | -1.73 | 0.16  |      | 0.52  | 0.64      |      | -4.89 | 0.02 | Down | -3.18 | 0.03  | Down | Expressed protein                             |
| Pc_TC111320 | 0.4   | 0.58  |      | 0.2   | 0.82      |      | -2.6  | 0.05 | Down | -3.18 | 0     | Down | Expressed protein                             |
| Pc_TC111327 | 0     | 0     |      | 0     | 0         |      | 0     | 0    |      | -3.96 | 0.01  | Down | tubulin beta-5 chain                          |
| Pc_TC111328 | 0.49  | 0.83  |      | 0.8   | 0.67      |      | 2.7   | 0.07 |      | 2.56  | 0.03  | Up   | Expressed protein                             |
| Pc_TC111332 | -1.29 | 0.04  | Down | -0.75 | 0.29      |      | 0.13  | 0.9  |      | -0.17 | 0.82  |      | Expressed protein                             |
| Pc_TC111364 | 0.37  | 0.51  |      | 0.48  | 0.47      |      | -1.33 | 0.22 |      | -1.54 | 0.04  | Down | Expressed protein                             |
| Pc_TC111384 | -1.01 | 0.43  |      | -1.03 | 0.46      |      | -1    | 0.53 |      | -3.46 | 0.03  | Down | Uncharacterized protein                       |
| Pc_TC111385 | 1.21  | 0.15  |      | 2.3   | 0.01      | Up   | -0.98 | 0.52 |      | -0.77 | 0.52  |      | Expressed protein                             |
| Pc_TC111387 | 0     | 0     |      | 0     | 0         |      | -3.08 | 0.05 | Down | 0     | 0     |      | Expressed protein                             |
| Pc_TC111389 | -2.46 | 0.03  | Down | -1.99 | 0.1       |      | 0.85  | 0.49 |      | -0.37 | 0.73  |      | OSJNBb0015D13.14 protein                      |
| Pc_TC111398 | -0.56 | 0.39  |      | -0.98 | 0.21      |      | -0.03 | 0.98 |      | -1.63 | 0.04  | Down | Expressed protein                             |
| Pc_TC111400 | 0.37  | 0.31  |      | 1.06  | 0.02      | Up   | -1.1  | 0.22 |      | -1.52 | 0.01  | Down | Expressed protein                             |
| Pc_TC111414 | 0.01  | 1     |      | 0.22  | 0.82      |      | -1.77 | 0.19 |      | -2.03 | 0.05  | Down | Expressed protein                             |
| Pc_TC111421 | 0.74  | 0.53  |      | 2.47  | 0.01      | Up   | 0.09  | 1    |      | -0.79 | 0.61  |      | Expressed protein                             |
| Pc_TC111426 | 1.26  | 0     | Up   | 0     | 7.79E-017 |      | 1.49  | 0.1  |      | 0.38  | 0.52  |      | calmodulin 3                                  |
| Pc_TC111431 | -0.09 | 1     |      | -0.11 | 0.98      |      | -4.67 | 0.03 | Down | 0.5   | 0.66  |      | Expressed protein                             |
| Pc_TC111457 | -1.21 | 0.29  |      | -1.59 | 0.22      |      | 2.49  | 0.04 | Up   | 1     | 0.3   |      | Expressed protein                             |
| Pc_TC111459 | 0.6   | 0.34  |      | 0.77  | 0.29      |      | -2.96 | 0.02 | Down | -0.58 | 0.47  |      | beta carbonic anhydrase 5                     |
| Pc_TC111462 | -0.46 | 0.74  |      | -1.36 | 0.36      |      | -4.5  | 0.04 | Down | -0.47 | 0.74  |      | Expressed protein                             |
| Pc_TC111478 | -0.11 | 0.96  |      | 2.06  | 0.01      | Up   | 0.67  | 0.61 |      | 0.47  | 0.64  |      | Expressed protein                             |
| Pc_TC111493 | 4.12  | 0     | Up   | 3.52  | 0.03      | Up   | 3.79  | 0.03 | Up   | 4.89  | 0     | Up   | Expressed protein                             |
| Pc_TC111495 | 2.6   | 0     | Up   | 2.38  | 0.02      | Up   | 2.13  | 0.11 |      | 3.13  | 0     | Up   | Expressed protein                             |
| Pc_TC111496 | -1.57 | 0.01  | Down | -0.49 | 0.48      |      | -1.59 | 0.15 |      | -1.37 | 0.07  |      | Expressed protein                             |
| Pc_TC111499 | -0.22 | 0.61  |      | -0.2  | 0.71      |      | -0.52 | 0.58 |      | -1.46 | 0.02  | Down | Expressed protein                             |
| Pc_TC111514 | -0.25 | 0.73  |      | 0.84  | 0.24      |      | -2.89 | 0.02 | Down | -1.64 | 0.05  |      | Expressed protein                             |
| Pc_TC111515 | 0     | ##### |      | -4.3  | 0         | Down | -3.85 | 0.01 | Down | 0     | ##### |      | 1-cysteine peroxiredoxin 1                    |
| Pc_TC111516 | -1.17 | 0.13  |      | -1.85 | 0.05      | Down | 1.43  | 0.19 |      | 0.57  | 0.47  |      | Expressed protein                             |
| Pc_TC111522 | -4.59 | 0     | Down | -2.44 | 0.02      | Down | -0.44 | 0.72 |      | -1.65 | 0.08  |      | Homeodomain-like transcriptional regulator    |
| Pc_TC111535 | 0.26  | 0.79  |      | 0.41  | 0.69      |      | -3.77 | 0.02 | Down | -1.77 | 0.11  |      | Expressed protein                             |
| Pc_TC111543 | 0.16  | 0.83  |      | -0.23 | 0.8       |      | -3.22 | 0.02 | Down | -0.49 | 0.56  |      | Expressed protein                             |
| Pc_TC111548 | -0.92 | 0.83  |      | 2.81  | 0.04      | Up   | -0.5  | 0.95 |      | -0.37 | 0.99  |      | Expressed protein                             |
| Pc_TC111554 | 0.08  | 1     |      | -1.02 | 0.45      |      | 1.5   | 0.24 |      | 2.62  | 0     | Up   | Expressed protein                             |
| Pc_TC111573 | 0.08  | 0.96  |      | 0.51  | 0.57      |      | -4.16 | 0.01 | Down | -3.04 | 0.01  | Down | Expressed protein                             |
| Pc_TC111577 | 0.65  | 0.41  |      | 0.63  | 0.49      |      | -4.63 | 0.01 | Down | -2.04 | 0.06  |      | Expressed protein                             |
| Pc_TC111581 | 0.91  | 0.47  |      | 2.21  | 0.04      | Up   | 1.5   | 0.31 |      | 1.26  | 0.3   |      | Expressed protein                             |
| Pc_TC111588 | 1.34  | 0.21  |      | 2.38  | 0.02      | Up   | 1.09  | 0.48 |      | 0.89  | 0.49  |      | Expressed protein                             |
| Pc_TC111600 | 3.18  | 0     | Up   | 0     | 0.15      |      | 2.16  | 0.15 |      | 1.68  | 0.18  |      | PDI-like 2-2                                  |
| Pc_TC111604 | -1.92 | 0.02  | Down | -1.3  | 0.15      |      | -1.14 | 0.34 |      | -2.47 | 0.01  | Down | Expressed protein                             |
| Pc_TC111606 | -0.06 | 0.91  |      | -0.22 | 0.71      |      | -2.49 | 0.02 | Down | -1.52 | 0.02  | Down | Expressed protein                             |
| Pc_TC111624 | 3.03  | 0     | Up   | 1.38  | 0.29      |      | 2.2   | 0.12 |      | 3.1   | 0     | Up   | nuclear pore anchor                           |

|             |       |       |      |       |           |      |       |           |      |       |       |      |                                                       |
|-------------|-------|-------|------|-------|-----------|------|-------|-----------|------|-------|-------|------|-------------------------------------------------------|
| Pc_TC111638 | -2.92 | 0     | Down | -0.83 | 0.38      |      | 0.01  | 1         |      | -0.6  | 0.51  |      | Expressed protein                                     |
| Pc_TC111645 | -0.64 | 0.46  |      | -0.44 | 0.66      |      | 2.56  | 0.02      | Up   | 1.06  | 0.19  |      | Expressed protein                                     |
| Pc_TC111648 | 0.02  | 1     |      | -0.78 | 0.4       |      | 3.7   | 0         | Up   | 1.32  | 0.09  |      | Expressed protein                                     |
| Pc_TC111671 | 2.74  | 0.01  | Up   | 0     | 0.2       |      | 1.78  | 0.27      |      | 0.21  | 1     |      | Expressed protein                                     |
| Pc_TC111673 | 0.45  | 0.5   |      | 1.26  | 0.08      |      | -3.48 | 0.01      | Down | -0.8  | 0.34  |      | Expressed protein                                     |
| Pc_TC111675 | 0     | 0.64  |      | 0.64  | 0.98      |      | 5.19  | 0         | Up   | 0     | 0.54  |      | Expressed protein                                     |
| Pc_TC111677 | 0.61  | 0.36  |      | 1.52  | 0.03      | Up   | -0.31 | 0.79      |      | -0.08 | 0.94  |      | Expressed protein                                     |
| Pc_TC111686 | -0.1  | 0.99  |      | -2.44 | 0.12      |      | 3.39  | 0         | Up   | 2.12  | 0.02  | Up   | Expressed protein                                     |
| Pc_TC111689 | 0.25  | 0.51  |      | 0.57  | 0.22      |      | -3.58 | 0         | Down | -1.71 | 0     | Down | Expressed protein                                     |
| Pc_TC111691 | 0     | 1     |      | 0.62  | 0.49      |      | -2.67 | 0.07      |      | -2.74 | 0.02  | Down | Expressed protein                                     |
| Pc_TC111719 | 0.18  | 0.85  |      | 1.93  | 0.01      | Up   | -3.12 | 0.03      | Down | -3.8  | 0     | Down | Expressed protein                                     |
| Pc_TC111735 | 0.71  | 0.28  |      | 1.43  | 0.05      | Up   | -6.56 | 0         | Down | -2.44 | 0.01  | Down | Expressed protein                                     |
| Pc_TC111747 | 0.67  | 0.22  |      | 2.35  | 6.62E-005 | Up   | -2.49 | 0.03      | Down | -1.14 | 0.12  |      | Expressed protein                                     |
| Pc_TC111776 | -0.98 | 0.36  |      | -3    | 0.04      | Down | -0.33 | 0.83      |      | -1.11 | 0.32  |      | Expressed protein                                     |
| Pc_TC111783 | -1.31 | 0.26  |      | -1.75 | 0.19      |      | -0.98 | 0.52      |      | -3.77 | 0.01  | Down | Expressed protein                                     |
| Pc_TC111784 | -1.58 | 0.09  |      | -0.91 | 0.36      |      | -1.21 | 0.35      |      | -2.15 | 0.04  | Down | Uncharacterized protein                               |
| Pc_TC111790 | -0.05 | 0.95  |      | 1.35  | 0.05      | Up   | -3.68 | 0.01      | Down | -2.63 | 0     | Down | Expressed protein                                     |
| Pc_TC111803 | 1.35  | 0.05  | Up   | 1.01  | 0.22      |      | -0.79 | 0.53      |      | -0.16 | 0.88  |      | Expressed protein                                     |
| Pc_TC111805 | -0.09 | 0.9   |      | 0.17  | 0.81      |      | -3.07 | 0.01      | Down | -1.6  | 0.04  | Down | Expressed protein                                     |
| Pc_TC111822 | 1.82  | 0.02  | Up   | 0     | 0.01      |      | 3.37  | 0         | Up   | 0.76  | 0.45  |      | uricase / urate oxidase / nodulin 35,putative         |
| Pc_TC111823 | 2.08  | ##### | Up   | 0     | 1.15E-009 |      | 1.3   | 0.2       |      | -0.04 | 0.96  |      | Ribosomal protein L13 family protein                  |
| Pc_TC111833 | 2.38  | 0     | Up   | 0     | 6.30E-005 |      | 2.4   | 0.03      | Up   | 0.01  | 1     |      | Expressed protein                                     |
| Pc_TC111843 | -4.45 | 0.01  | Down | -2.88 | 0.05      | Down | -0.07 | 0.99      |      | -2.09 | 0.09  |      | glyceraldehyde-3-phosphate dehydrogenase of plastid 2 |
| Pc_TC111854 | -0.21 | 0.72  |      | 0.16  | 0.82      |      | -3.41 | 0         | Down | -2.32 | 0     | Down | Expressed protein                                     |
| Pc_TC111860 | 0     | 1     |      | 0.62  | 0.38      |      | -2.44 | 0.04      | Down | -2.81 | 0     | Down | Expressed protein                                     |
| Pc_TC111865 | -0.2  | 0.74  |      | 1.36  | 0.03      | Up   | -3.57 | 0         | Down | -1.54 | 0.04  | Down | autoinhibited Ca(2+)-ATPase 9                         |
| Pc_TC111869 | 0.08  | 1     |      | 1.56  | 0.27      |      | -2.08 | 0.43      |      | 2.53  | 0.03  | Up   | NB-ARC domain-containing disease resistance protein   |
| Pc_TC111906 | -0.13 | 0.86  |      | 0.82  | 0.26      |      | -2.57 | 0.04      | Down | -1.02 | 0.21  |      | Expressed protein                                     |
| Pc_TC111907 | -0.46 | 0.6   |      | -0.63 | 0.52      |      | -4.89 | 0         | Down | -2.07 | 0.04  | Down | Uncharacterized protein                               |
| Pc_TC111920 | -0.48 | 0.33  |      | 0.73  | 0.19      |      | -3.62 | 0         | Down | -1.8  | 0.01  | Down | arginine decarboxylase 2                              |
| Pc_TC111925 | -0.1  | 0.9   |      | 0.42  | 0.58      |      | -2.66 | 0.04      | Down | -2.72 | 0     | Down | Expressed protein                                     |
| Pc_TC111936 | 0.6   | 0.51  |      | 1.93  | 0.03      | Up   | -1.02 | 0.49      |      | -1.09 | 0.35  |      | Expressed protein                                     |
| Pc_TC111940 | 0.12  | 0.78  |      | 0.87  | 0.08      |      | -2.64 | 0.01      | Down | -1.34 | 0.03  | Down | Expressed protein                                     |
| Pc_TC111942 | -0.01 | 1     |      | -3.03 | 0.02      | Down | 3.37  | 0         | Up   | 0.52  | 0.57  |      | gag protein                                           |
| Pc_TC111943 | 0.56  | 0.62  |      | 2.4   | 0.01      | Up   | -1.82 | 0.3       |      | -0.47 | 0.74  |      | Expressed protein                                     |
| Pc_TC111966 | -0.99 | 0.24  |      | 0.86  | 0.3       |      | -4.02 | 0.01      | Down | -3.58 | 0     | Down | heat shock protein 81-2                               |
| Pc_TC111972 | 0.8   | 0.36  |      | 2.16  | 0.01      | Up   | -0.63 | 0.67      |      | 0.63  | 0.53  |      | ATP synthase alpha/beta family protein                |
| Pc_TC111974 | -0.37 | 0.61  |      | -0.79 | 0.34      |      | -2.1  | 0.09      |      | -1.87 | 0.03  | Down | Expressed protein                                     |
| Pc_TC111983 | -0.36 | 0.63  |      | -0.18 | 0.84      |      | -1.93 | 0.12      |      | -2.23 | 0.02  | Down | Uncharacterized protein                               |
| Pc_TC111991 | 0     | 1     |      | 0.74  | 0.3       |      | -1.55 | 0.18      |      | -1.8  | 0.03  | Down | Expressed protein                                     |
| Pc_TC111993 | 0.61  | 0.41  |      | -2.11 | 0.05      | Down | -0.21 | 0.88      |      | -0.44 | 0.64  |      | UDP-Glycosyltransferase superfamily protein           |
| Pc_TC112007 | -1.66 | 0.03  | Down | -0.82 | 0.33      |      | -0.36 | 0.76      |      | -0.98 | 0.25  |      | Methyl transferase-like protein 13                    |
| Pc_TC112011 | 3.04  | ##### | Up   | 0     | 2.99E-008 |      | 3.06  | 0         | Up   | 1.73  | 0.01  | Up   | Expressed protein                                     |
| Pc_TC112047 | 0.47  | 0.58  |      | 1.66  | 0.04      | Up   | -2.5  | 0.09      |      | -0.67 | 0.51  |      | zinc transporter 3 precursor                          |
| Pc_TC112049 | 0.36  | 0.24  |      | 0.81  | 0.04      |      | -4.4  | 4.16E-006 | Down | -2.05 | ##### | Down | Expressed protein                                     |
| Pc_TC112055 | 0.37  | 0.58  |      | 1.52  | 0.03      | Up   | -0.04 | 0.98      |      | -0.82 | 0.32  |      | Expressed protein                                     |
| Pc_TC112060 | -3.83 | 0.04  | Down | -1.85 | 0.24      |      | 2.52  | 0.04      | Up   | 1.18  | 0.26  |      | Expressed protein                                     |
| Pc_TC112078 | -0.14 | 0.88  |      | -0.1  | 0.93      |      | -4.35 | 0         | Down | -3.65 | 0     | Down | Expressed protein                                     |
| Pc_TC112079 | -0.47 | 0.61  |      | 0.68  | 0.45      |      | 0     | 0         |      | -2.33 | 0.04  | Down | Expressed protein                                     |
| Pc_TC112080 | 3.25  | 0     | Up   | 0     | 0.27      |      | 1.57  | 0.37      |      | 0.76  | 0.7   |      | Expressed protein                                     |
| Pc_TC112083 | -1.44 | 0.12  |      | -0.51 | 0.61      |      | -3.82 | 0.01      | Down | -0.61 | 0.53  |      | Putative retrovirus-related pol polyprotein           |
| Pc_TC112087 | 4.1   | ##### | Up   | 0     | 0.07      |      | 2.41  | 0.07      |      | -0.53 | 0.77  |      | Expressed protein                                     |
| Pc_TC112108 | -0.76 | 0.33  |      | -1.92 | 0.05      | Down | 0.71  | 0.53      |      | 0.7   | 0.38  |      | Expressed protein                                     |
| Pc_TC112111 | 1.4   | 0.13  |      | 1.3   | 0.23      |      | 0.45  | 0.79      |      | 2.12  | 0.03  | Up   | Expressed protein                                     |
| Pc_TC112137 | 1.68  | 0.03  | Up   | 2.38  | 0         | Up   | -0.5  | 0.74      |      | 1.68  | 0.05  |      | Uncharacterized                                       |
| Pc_TC112141 | -1.28 | 0.11  |      | -2.12 | 0.03      | Down | 0.99  | 0.38      |      | -0.07 | 0.95  |      | sulfoquinovosyldiacylglycerol 2                       |
| Pc_TC112143 | 2.34  | 0     | Up   | 0     | 0         |      | 2.53  | 0.03      | Up   | 0.12  | 0.92  |      | Expressed protein                                     |
| Pc_TC112147 | 0.98  | 0.13  |      | 0.95  | 0.21      |      | -3.01 | 0.02      | Down | -1.1  | 0.2   |      | Expressed protein                                     |
| Pc_TC112228 | 0.05  | 0.99  |      | 0.89  | 0.28      |      | -1.67 | 0.2       |      | -3.28 | 0     | Down | Expressed protein                                     |
| Pc_TC112232 | -0.82 | 0.27  |      | -2.14 | 0.02      | Down | 0.82  | 0.46      |      | -0.31 | 0.71  |      | Expressed protein                                     |
| Pc_TC112250 | -0.35 | 0.7   |      | 0.3   | 0.76      |      | -1.69 | 0.21      |      | -3.08 | 0.01  | Down | Expressed protein                                     |
| Pc_TC112263 | 0.69  | 0.36  |      | 1.75  | 0.02      | Up   | -1.36 | 0.3       |      | -0.49 | 0.61  |      | Expressed protein                                     |

|             |       |      |      |       |           |      |       |      |      |       |       |      |                                                                     |      |
|-------------|-------|------|------|-------|-----------|------|-------|------|------|-------|-------|------|---------------------------------------------------------------------|------|
| Pc_TC112269 | 0.57  | 0.33 |      | 0.56  | 0.42      |      | -3.28 | 0.01 | Down | -1.7  | 0.03  | Down | Expressed protein                                                   |      |
| Pc_TC112276 | -1.04 | 0.25 |      | -2.34 | 0.04      | Down | -2.71 | 0.06 |      | -2.26 | 0.04  | Down | ATP synthase alpha/beta family protein                              |      |
| Pc_TC112283 | 1.65  | 0.02 | Up   | 0     | 0         |      | 1.28  | 0.28 |      | -0.96 | 0.36  |      | plant intracellular ras group-related LRR 2                         |      |
| Pc_TC112293 | 1.02  | 0.21 |      | 0.46  | 0.67      |      | -1.23 | 0.39 |      | 2.72  | 0     | Up   | Expressed protein                                                   |      |
| Pc_TC112305 | 0.48  | 0.5  |      | 1.28  | 0.09      |      | -2.5  | 0.06 |      | -2.18 | 0.02  | Down | Expressed protein                                                   |      |
| Pc_TC112306 | 0.45  | 0.55 |      | 1.43  | 0.06      |      | -2.76 | 0.05 | Down | -0.37 | 0.69  |      | Uncharacterized protein                                             |      |
| Pc_TC112309 | -0.32 | 0.78 |      | 0.37  | 0.74      |      | 2.38  | 0.04 | Up   | 1.05  | 0.25  |      | Expressed protein                                                   |      |
| Pc_TC112320 | 1.62  | 0.03 | Up   | 1.46  | 0.1       |      | -0.28 | 0.86 |      | 0.71  | 0.46  |      | Expressed protein                                                   |      |
| Pc_TC112329 | 1.63  | 0.03 | Up   | 0     | 0         |      | 1.88  | 0.11 |      | -0.62 | 0.58  |      | purin 7                                                             |      |
| Pc_TC112353 | 1.25  | 0.31 |      | 2.23  | 0.05      | Up   | 0.09  | 1    |      | 0.33  | 0.89  |      | Expressed protein                                                   |      |
| Pc_TC112354 | 0.41  | 0.55 |      | 0.06  | 0.96      |      | -4.52 | 0    | Down | -1.49 | 0.09  |      | Uncharacterized protein                                             |      |
| Pc_TC112358 | 2.15  | 0.01 | Up   | 0     | 0.02      |      | 1.09  | 0.44 |      | -0.01 | 1     |      | nitrate reductase 2                                                 |      |
| Pc_TC112362 | 2.95  | 0.03 | Up   | 3.06  | 0.03      | Up   | 2.96  | 0.09 |      | 0.63  | 0.88  |      | Expressed protein                                                   |      |
| Pc_TC112370 | 0.08  | 0.97 |      | -1.94 | 0.11      |      | -5.3  | 0.01 | Down | -2.86 | 0.02  | Down | Expressed protein                                                   |      |
| Pc_TC112392 | -1.96 | 0.04 | Down | -3.71 | 0         | Down | -3.85 | 0.01 | Down | -3.73 | 0     | Down | photosystem I light harvesting complex gene 2                       |      |
| Pc_TC112395 | -0.56 | 0.58 |      | -3.75 | 0.01      | Down | 1.67  | 0.16 |      | 1.07  | 0.23  |      | Expressed protein                                                   |      |
| Pc_TC112403 | -0.51 | 0.43 |      | -0.38 | 0.62      |      | -2.92 | 0.02 | Down | -1.95 | 0.02  | Down | Uncharacterized protein                                             |      |
| Pc_TC112405 | 0.58  | 0.05 |      | 0.2   | 0.58      |      | -2.07 | 0.02 | Down | -1.07 | 0.03  | Down | Expressed protein                                                   |      |
| Pc_TC112407 | -0.66 | 0.21 |      | 0.44  | 0.46      |      | -1.67 | 0.11 |      | -1.84 | 0.01  | Down | Expressed protein                                                   |      |
| Pc_TC112408 | 0.15  | 0.88 |      | 0.53  | 0.56      |      | -0.78 | 0.55 |      | -3.08 | 0.01  | Down | Expressed protein                                                   |      |
| Pc_TC112412 | 0.36  | 0.72 |      | 0.18  | 0.91      |      | -4.02 | 0.03 | Down | -1.58 | 0.19  |      | Uncharacterized protein (Fragment)                                  |      |
| Pc_TC112420 | 0.33  | 0.61 |      | 1.17  | 0.09      |      | -4    | 0    | Down | -1.88 | 0.03  | Down | Uncharacterized protein                                             |      |
| Pc_TC112421 | 1.04  | 0.06 |      | 1.25  | 0.05      |      | -4.35 | 0    | Down | -3.59 | ##### | Down | Expressed protein                                                   |      |
| Pc_TC112423 | 0.86  | 0.17 |      | 1.18  | 0.1       |      | -2.66 | 0.04 | Down | -1.13 | 0.18  |      | Retputative unclassified                                            |      |
| Pc_TC112429 | -1.33 | 0.01 | Down | -0.92 | 0.15      |      | -0.51 | 0.61 |      | -0.43 | 0.51  |      | BED zinc finger ;hAT family dimerisation domain                     |      |
| Pc_TC112430 | 1.29  | 0.02 | Up   | -0.34 | 0.65      |      | 1.91  | 0.06 |      | 1.32  | 0.05  |      | BED zinc finger ;hAT family dimerisation domain                     |      |
| Pc_TC112437 | -1.16 | 0.16 |      | 0.17  | 0.87      |      | -1.8  | 0.16 |      | -2.08 | 0.03  | Down | Chlorophyll A-B binding family protein                              |      |
| Pc_TC112440 | -3.24 | 0.03 | Down | -3.26 | 0.05      | Down | -1.36 | 0.38 |      | -1.37 | 0.27  |      | Expressed protein                                                   |      |
| Pc_TC112449 | 0.8   | 0.25 |      | 1.31  | 0.09      |      | -2.41 | 0.07 |      | -2.4  | 0.02  | Down | Expressed protein                                                   |      |
| Pc_TC112462 | -3.17 | 0.04 | Down | -1.38 | 0.31      |      | -1.42 | 0.37 |      | -0.54 | 0.67  |      | Expressed protein                                                   |      |
| Pc_TC112463 | 0.15  | 0.86 |      | 0.47  | 0.55      |      | -3.47 | 0.01 | Down | -2.45 | 0.01  | Down | unknown protein                                                     |      |
| Pc_TC112465 | -0.51 | 0.49 |      | -0.56 | 0.51      |      | -1.52 | 0.21 |      | -3.31 | 0     | Down | Expressed protein                                                   |      |
| Pc_TC112474 | 1.21  | 0.19 |      | 1.01  | 0.35      |      | 0.86  | 0.54 |      | 1.87  | 0.05  | Up   | Expressed protein                                                   |      |
| Pc_TC112479 | 2.76  | 0.01 | Up   | 2.44  | 0.06      |      | 3.23  | 0.03 | Up   | 0.3   | 0.97  |      | Expressed protein                                                   |      |
| Pc_TC112504 | -1.88 | 0.06 |      | 0.39  | 0.69      |      | -4.63 | 0.01 | Down | -0.7  | 0.49  |      | Expressed protein                                                   |      |
| Pc_TC112516 | 0.08  | 0.95 |      | -0.26 | 0.81      |      | 1.03  | 0.38 |      | 1.58  | 0.05  | Up   | Expressed protein                                                   |      |
| Pc_TC112517 | 0.11  | 0.91 |      | 0.09  | 0.94      |      | -3.5  | 0.02 | Down | -1.5  | 0.11  |      | Pyridine nucleotide-disulphide oxidoreductase family protein        |      |
| Pc_TC112518 | 0.53  | 0.51 |      | 1.7   | 0.04      | Up   | 0.35  | 0.79 |      | 1.05  | 0.22  |      | Expressed protein                                                   |      |
| Pc_TC112537 | 0     | 0.16 |      | 0     | 0.2       |      | 3.47  | 0.01 | Up   | -1.37 | 0.55  |      | glutamine synthetase 1;4                                            |      |
| Pc_TC112560 | 0.59  | 0.49 |      | 0.77  | 0.41      |      | -4.3  | 0.02 | Down | -2.01 | 0.08  |      | Expressed protein                                                   |      |
| Pc_TC112562 | 0.52  | 0.57 |      | 0.77  | 0.43      |      | -4.14 | 0.02 | Down | -2.7  | 0.04  | Down | Expressed protein                                                   |      |
| Pc_TC112567 | 2.41  | 0    | Up   | 0     | 0         |      | 1.97  | 0.08 |      | 1     | 0.24  |      | peroxisomal 3-ketoacyl-CoA thiolase 4                               |      |
| Pc_TC112598 | 0.57  | 0.05 |      | 0.38  | 0.3       |      | -2    | 0.02 | Down | -0.49 | 0.31  |      | Expressed protein                                                   |      |
| Pc_TC112599 | 0.71  | 0.13 |      | 1.22  | 0.03      | Up   | -2.84 | 0.01 | Down | -0.66 | 0.31  |      | Expressed protein                                                   |      |
| Pc_TC112601 | 0.08  | 1    |      | 2.43  | 0.05      | Up   | 0.5   | 0.85 |      | -0.15 | 1     |      | Expressed protein                                                   |      |
| Pc_TC112602 | 0.08  | 1    |      | -0.62 | 0.67      |      | 3.36  | 0.01 | Up   | 2     | 0.03  | Up   | Expressed protein                                                   |      |
| Pc_TC112612 | -3.21 | 0    | Down | -2.23 | 0.05      | Down | -0.78 | 0.55 |      | -1.14 | 0.25  |      | Expressed protein                                                   |      |
| Pc_TC112619 | 0.17  | 0.8  |      | 0.68  | 0.33      |      | -2.72 | 0.02 | Down | -0.61 | 0.42  |      | Expressed protein                                                   |      |
| Pc_TC112622 | -1.51 | 0.77 |      | 2.38  | 0.15      |      | 3.31  | 0.05 | Up   | -0.37 | 1     |      | OSJNba0093F12.20 protein                                            |      |
| Pc_TC112625 | -0.16 | 0.94 |      | -4.26 | 0.02      | Down | 0.85  | 0.52 |      | 0.86  | 0.39  |      | wall associated kinase 3                                            |      |
| Pc_TC112659 | -0.07 | 0.94 |      | 0.02  | 1         |      | -1.91 | 0.12 |      | -2.02 | 0.02  | Down | Expressed protein                                                   |      |
| Pc_TC112665 | -0.2  | 0.92 |      | 0.78  | 0.48      |      | 0.7   | 0.62 |      | 2.8   | 0     | Up   | Uncharacterized protein                                             |      |
| Pc_TC112667 | -2.66 | 0    | Down | -0.42 | 0.58      |      | -0.23 | 0.84 |      | -0.79 | 0.3   |      | Galactose oxidase/kelch repeat superfamily protein                  |      |
| Pc_TC112668 | 1.42  | 0.03 | Up   | -1.53 | 0.12      |      | 1.33  | 0.24 |      | -0.26 | 0.78  |      | Expressed protein                                                   |      |
| Pc_TC112669 | 1.49  | 0.02 | Up   | 1.23  | 0.12      |      | 1.04  | 0.37 |      | 2.03  | 0.01  | Up   | Galactose oxidase/kelch repeat superfamily protein                  |      |
| Pc_TC112671 | -2.03 | 0    | Down | -0.01 | 1         |      | 0.59  | 0.56 |      | -0.03 | 0.97  |      | Galactose oxidase/kelch repeat superfamily protein                  |      |
| Pc_TC112704 | -0.14 | 0.84 |      | -0.08 | 0.93      |      | -1.41 | 0.22 |      | -2.29 | 0.01  | Down | Expressed protein                                                   |      |
| Pc_TC112718 | 1.53  | 0.13 |      | 1.69  | 0.13      |      | 1.69  | 0.23 |      | 2.1   | 0.04  | Up   | SNF2 domain-containing protein / helicase domain-containing protein | SNF2 |
| Pc_TC112719 | -0.57 | 0.34 |      | 0.31  | 0.65      |      | -0.82 | 0.44 |      | -1.69 | 0.03  | Down | SNF2 domain-containing protein / helicase domain-containing protein | SNF2 |
| Pc_TC112753 | 1.84  | 0    | Up   | 0     | 1.41E-007 |      | 1.05  | 0.32 |      | -0.05 | 0.96  |      | Expressed protein                                                   |      |
| Pc_TC112762 | -0.21 | 0.82 |      | 0.48  | 0.58      |      | -3.37 | 0.02 | Down | -1.66 | 0.09  |      | Expressed protein                                                   |      |
| Pc_TC112766 | 0.99  | 0.31 |      | 1.92  | 0.04      | Up   | -0.33 | 0.86 |      | -0.57 | 0.68  |      | Expressed protein                                                   |      |

|             |       |       |      |       |      |      |       |           |      |       |       |      |                                                         |
|-------------|-------|-------|------|-------|------|------|-------|-----------|------|-------|-------|------|---------------------------------------------------------|
| Pc_TC112768 | -0.77 | 0.45  |      | 0.06  | 1    |      | -2.67 | 0.09      |      | -3.13 | 0.02  | Down | Expressed protein                                       |
| Pc_TC112788 | 0.36  | 0.26  |      | 0.29  | 0.48 |      | -2.29 | 0.01      | Down | -0.77 | 0.13  |      | Expressed protein                                       |
| Pc_TC112793 | 2.74  | 0.01  | Up   | 0     | 0.2  |      | 2.28  | 0.14      |      | 1.99  | 0.11  |      | acyl-CoA oxidase 4                                      |
| Pc_TC112795 | 0.16  | 0.93  |      | 0.35  | 0.79 |      | -1.34 | 0.4       |      | -3.54 | 0.03  | Down | Expressed protein                                       |
| Pc_TC112799 | -3.05 | 0     | Down | -3.75 | 0    | Down | -3.46 | 0.01      | Down | -4.92 | ##### | Down | Expressed protein                                       |
| Pc_TC112802 | -0.84 | 0.37  |      | -3.03 | 0.02 | Down | -0.09 | 0.96      |      | -0.37 | 0.72  |      | Expressed protein                                       |
| Pc_TC112817 | -0.3  | 0.41  |      | 0.28  | 0.54 |      | -6.66 | 1.25E-008 | Down | -3.72 | ##### | Down | Expressed protein                                       |
| Pc_TC112821 | 0.36  | 0.64  |      | -0.07 | 0.96 |      | -3.21 | 0.03      | Down | -0.58 | 0.53  |      | Expressed protein                                       |
| Pc_TC112822 | 2.99  | 0.06  |      | 1.87  | 0.44 |      | 4.39  | 0.01      | Up   | 1.21  | 0.69  |      | Expressed protein                                       |
| Pc_TC112832 | 0.16  | 0.88  |      | 0.21  | 0.85 |      | -3.08 | 0.04      | Down | -0.37 | 0.71  |      | Expressed protein                                       |
| Pc_TC112836 | 0.82  | 0.2   |      | 1.39  | 0.05 | Up   | -1.01 | 0.39      |      | 0.26  | 0.75  |      | Expressed protein                                       |
| Pc_TC112839 | -0.88 | 0.33  |      | -2.83 | 0.02 | Down | 0.1   | 0.96      |      | -0.26 | 0.8   |      | Expressed protein                                       |
| Pc_TC112841 | 0.68  | 0.33  |      | 1.66  | 0.03 | Up   | 0     | 0         |      | -2.91 | 0.01  | Down | Expressed protein                                       |
| Pc_TC112847 | 0.61  | 0.36  |      | 0.99  | 0.18 |      | -4    | 0         | Down | -2.46 | 0.01  | Down | Expressed protein                                       |
| Pc_TC112851 | -0.24 | 0.84  |      | 0.11  | 0.95 |      | 1.88  | 0.11      |      | 1.76  | 0.04  | Up   | Expressed protein                                       |
| Pc_TC112856 | 0.64  | 0.41  |      | 0.35  | 0.72 |      | 1.4   | 0.23      |      | 2.29  | 0     | Up   | Expressed protein                                       |
| Pc_TC112857 | 0.39  | 0.61  |      | 1.96  | 0.01 | Up   | 0     | 0         |      | -3.87 | 0     | Down | ABC-2 and Plant PDR ABC-type transporter family protein |
| Pc_TC112862 | 0.03  | 0.98  |      | 0.93  | 0.17 |      | -1.6  | 0.16      |      | -1.65 | 0.04  | Down | Expressed protein                                       |
| Pc_TC112866 | 0.35  | 0.41  |      | 0.83  | 0.11 |      | -2.53 | 0.01      | Down | -1.16 | 0.06  |      | Expressed protein                                       |
| Pc_TC112867 | 0.06  | 0.88  |      | 0.22  | 0.67 |      | -1.66 | 0.08      |      | -1.21 | 0.04  | Down | Expressed protein                                       |
| Pc_TC112869 | 0.63  | 0.35  |      | 1.42  | 0.05 |      | -2.75 | 0.04      | Down | -1.28 | 0.15  |      | Expressed protein                                       |
| Pc_TC112877 | 0.54  | 0.75  |      | 2.23  | 0.05 | Up   | -0.33 | 0.92      |      | 1.43  | 0.25  |      | Expressed protein                                       |
| Pc_TC112882 | -0.8  | 0.4   |      | 0.74  | 0.41 |      | -1.96 | 0.17      |      | -3.1  | 0.01  | Down | Expressed protein                                       |
| Pc_TC112885 | -1.14 | 0.15  |      | -3.16 | 0    | Down | 0.37  | 0.76      |      | -0.57 | 0.52  |      | Expressed protein                                       |
| Pc_TC112920 | 0     | 0.22  |      | 3.02  | 0.01 | Up   | 0     | 0.19      |      | -2.7  | 0.34  |      | Expressed protein                                       |
| Pc_TC112922 | -0.11 | 1     |      | 0.76  | 0.63 |      | 2.91  | 0.03      | Up   | 1.67  | 0.16  |      | Uncharacterized protein                                 |
| Pc_TC112949 | 1.48  | 0.04  | Up   | -0.41 | 0.7  |      | -4.67 | 0.01      | Down | 1.13  | 0.18  |      | Expressed protein                                       |
| Pc_TC112952 | 1.49  | 0.17  |      | 2.7   | 0.01 | Up   | -0.86 | 0.69      |      | 1.5   | 0.2   |      | fucosyltransferase 7                                    |
| Pc_TC112962 | 0     | 0     |      | -2.94 | 0.02 | Down | 0     | 0         |      | -4.37 | 0     | Down | Expressed protein                                       |
| Pc_TC112964 | -0.69 | 0.32  |      | 0.8   | 0.27 |      | -3    | 0.02      | Down | -1.78 | 0.04  | Down | Expressed protein                                       |
| Pc_TC112974 | 2.49  | 0     | Up   | 0     | 0    |      | 1.94  | 0.09      |      | 0.79  | 0.37  |      | Expressed protein                                       |
| Pc_TC112975 | 1.08  | 0.28  |      | 2.2   | 0.02 | Up   | -1.72 | 0.33      |      | -1.6  | 0.27  |      | Expressed protein                                       |
| Pc_TC112980 | 0.2   | 0.82  |      | 0.81  | 0.32 |      | -3.47 | 0.02      | Down | -4.93 | 0     | Down | Expressed protein                                       |
| Pc_TC112983 | 1.4   | 0.19  |      | 2.49  | 0.02 | Up   | -1.01 | 0.61      |      | 0.21  | 0.94  |      | Expressed protein                                       |
| Pc_TC113012 | -2.51 | 0.05  | Down | -2.94 | 0.04 | Down | -0.08 | 0.98      |      | -0.57 | 0.62  |      | Expressed protein                                       |
| Pc_TC113021 | -0.78 | 0.22  |      | 0.73  | 0.28 |      | 1.26  | 0.22      |      | 1.39  | 0.04  | Up   | CTC-interacting domain 7                                |
| Pc_TC113027 | -1.13 | 0.17  |      | -0.12 | 0.91 |      | 2.85  | 0.01      | Up   | 2.21  | 0     | Up   | serine carboxypeptidase-like 7                          |
| Pc_TC113045 | 1.23  | 0.1   |      | 0.96  | 0.28 |      | 1.18  | 0.33      |      | 2.73  | 0     | Up   | Expressed protein                                       |
| Pc_TC113046 | -0.1  | 0.92  |      | 0.51  | 0.54 |      | -2.61 | 0.05      |      | -2.08 | 0.03  | Down | Expressed protein                                       |
| Pc_TC113060 | -0.2  | 0.78  |      | 0.88  | 0.22 |      | -2.68 | 0.03      | Down | -1.37 | 0.1   |      | Putative uncharacterized protein                        |
| Pc_TC113061 | -1.73 | 0.05  | Down | -1.97 | 0.05 |      | 1.08  | 0.34      |      | 0.08  | 0.95  |      | Expressed protein                                       |
| Pc_TC113062 | 1.14  | 0.04  | Up   | 0.92  | 0.17 |      | -0.52 | 0.63      |      | 1.14  | 0.09  |      | Expressed protein                                       |
| Pc_TC113088 | 1.49  | 0.25  |      | 2.47  | 0.04 | Up   | 1.87  | 0.24      |      | 2.25  | 0.06  |      | Expressed protein                                       |
| Pc_TC113089 | 0.08  | 1     |      | 1.87  | 0.44 |      | 1.83  | 0.47      |      | 3.33  | 0.03  | Up   | Expressed protein                                       |
| Pc_TC113092 | -1.58 | 0.05  | Down | 0.17  | 0.85 |      | -3.01 | 0.02      | Down | 0.36  | 0.66  |      | Expressed protein                                       |
| Pc_TC113098 | 1.91  | 0.01  | Up   | 0     | 0    |      | 1.75  | 0.13      |      | 0.1   | 0.95  |      | Expressed protein                                       |
| Pc_TC113112 | -0.05 | 0.98  |      | 0.72  | 0.38 |      | -3.7  | 0.01      | Down | -2.2  | 0.03  | Down | Expressed protein                                       |
| Pc_TC113133 | -0.46 | 0.48  |      | 0.27  | 0.71 |      | 0     | 4.39E-006 |      | -4.61 | ##### | Down | Expressed protein                                       |
| Pc_TC113154 | 0.57  | 0.24  |      | 0.66  | 0.26 |      | -2.56 | 0.02      | Down | -1.78 | 0.01  | Down | Expressed protein                                       |
| Pc_TC113162 | -2.92 | 0.01  | Down | -2.94 | 0.02 | Down | -0.8  | 0.56      |      | -0.92 | 0.37  |      | DNA/RNA polymerases superfamily protein                 |
| Pc_TC113169 | -1.66 | 0.18  |      | -4.26 | 0.02 | Down | 0.5   | 0.73      |      | -0.05 | 1     |      | Expressed protein                                       |
| Pc_TC113178 | 0.74  | 0.12  |      | 1.26  | 0.02 | Up   | -1.5  | 0.15      |      | 0.11  | 0.87  |      | Expressed protein                                       |
| Pc_TC113182 | 2.84  | ##### | Up   | 0     | 0    |      | 2.16  | 0.06      |      | 1.26  | 0.14  |      | Expressed protein                                       |
| Pc_TC113184 | 0.76  | 0.38  |      | 0.29  | 0.81 |      | 2.75  | 0.02      | Up   | 1.98  | 0.02  | Up   | Expressed protein                                       |
| Pc_TC113205 | 0.29  | 0.58  |      | 0.96  | 0.11 |      | -7.23 | 2.01E-006 | Down | -3.16 | ##### | Down | Expressed protein                                       |
| Pc_TC113209 | -0.8  | 0.48  |      | -1.4  | 0.28 |      | 2.42  | 0.04      | Up   | 1.66  | 0.06  |      | Expressed protein                                       |
| Pc_TC113212 | -1.51 | 0.04  | Down | -0.81 | 0.32 |      | 0.58  | 0.6       |      | -0.04 | 0.97  |      | Expressed protein                                       |
| Pc_TC113223 | 0.4   | 0.58  |      | 0.74  | 0.35 |      | -4.3  | 0         | Down | -0.93 | 0.29  |      | Expressed protein                                       |
| Pc_TC113228 | 1.39  | 0.02  | Up   | 1.43  | 0.03 | Up   | -1.77 | 0.13      |      | 0.65  | 0.38  |      | Expressed protein                                       |
| Pc_TC113232 | 1.11  | 0.08  |      | 1.51  | 0.04 | Up   | -2.71 | 0.04      | Down | -0.06 | 0.96  |      | Expressed protein                                       |
| Pc_TC113243 | -2.41 | 0.04  | Down | -0.05 | 1    |      | 0.65  | 0.61      |      | -0.01 | 1     |      | nuclear RNA polymerase A2                               |
| Pc_TC113250 | 0.46  | 0.54  |      | 1.16  | 0.14 |      | -5.02 | 0         | Down | -1.14 | 0.22  |      | Expressed protein                                       |

|             |       |       |      |       |           |      |       |      |      |       |       |      |                                                         |
|-------------|-------|-------|------|-------|-----------|------|-------|------|------|-------|-------|------|---------------------------------------------------------|
| Pc_TC113274 | 0.36  | 0.53  |      | 0.46  | 0.49      |      | -3.38 | 0.01 | Down | -1.09 | 0.14  |      | Expressed protein                                       |
| Pc_TC113275 | 2.74  | 0.01  | Up   | 0     | 0.2       |      | 1.96  | 0.21 |      | 0.63  | 0.74  |      | isocitrate dehydrogenase 1                              |
| Pc_TC113290 | 0.33  | 0.67  |      | 1.7   | 0.02      | Up   | -4.5  | 0    | Down | -3.96 | 0     | Down | Expressed protein                                       |
| Pc_TC113300 | -0.22 | 0.76  |      | 0.35  | 0.65      |      | -4.84 | 0    | Down | -2.54 | 0.01  | Down | Expressed protein                                       |
| Pc_TC113317 | 1.94  | 0.07  |      | 3.04  | 0         | Up   | 0.67  | 0.72 |      | 1.53  | 0.21  |      | Expressed protein                                       |
| Pc_TC113328 | 0     | 1     |      | -0.11 | 0.89      |      | -3.34 | 0.01 | Down | -2    | 0.02  | Down | Expressed protein                                       |
| Pc_TC113337 | -0.85 | 0.48  |      | 0.62  | 0.58      |      | 0     | 0.01 |      | -4.62 | 0.01  | Down | Expressed protein                                       |
| Pc_TC113338 | 0.03  | 1     |      | 0.36  | 0.73      |      | -2.82 | 0.07 |      | -2.7  | 0.03  | Down | Expressed protein                                       |
| Pc_TC113339 | 0.4   | 0.61  |      | 1.3   | 0.1       |      | -3.15 | 0.03 | Down | -0.98 | 0.3   |      | Expressed protein                                       |
| Pc_TC113355 | -2.85 | 0.01  | Down | -1.87 | 0.09      |      | -0.35 | 0.79 |      | -1.23 | 0.22  |      | Putative uncharacterized protein                        |
| Pc_TC113370 | -0.12 | 0.95  |      | 0.44  | 0.69      |      | -2.7  | 0.1  |      | -2.9  | 0.03  | Down | Expressed protein                                       |
| Pc_TC113375 | 1.75  | 0     | Up   | 0     | 5.50E-009 |      | 1.5   | 0.14 |      | -0.41 | 0.58  |      | Ribosomal protein L32e                                  |
| Pc_TC113385 | -4.62 | 0     | Down | 0.36  | 0.74      |      | 2.73  | 0.02 | Up   | 1.45  | 0.1   |      | Expressed protein                                       |
| Pc_TC113405 | 0     | ##### |      | -5.47 | 5.51E-006 | Down | -1.19 | 0.3  |      | -5.9  | ##### | Down | Expressed protein                                       |
| Pc_TC113438 | -1.56 | 0.06  |      | -2.58 | 0.01      | Down | 1.54  | 0.16 |      | 0.83  | 0.29  |      | Putative uncharacterized protein                        |
| Pc_TC113439 | 0.81  | 0.21  |      | 0.26  | 0.76      |      | 0.82  | 0.46 |      | 1.47  | 0.04  | Up   | Expressed protein                                       |
| Pc_TC113442 | -1.07 | 0.03  | Down | -0.41 | 0.47      |      | -0.04 | 0.97 |      | -0.45 | 0.47  |      | Putative uncharacterized protein                        |
| Pc_TC113454 | 1.71  | 0     | Up   | 0     | 3.22E-006 |      | 0.92  | 0.4  |      | 0.5   | 0.52  |      | Enolase                                                 |
| Pc_TC113455 | -0.62 | 0.4   |      | 0.08  | 0.94      |      | -4.58 | 0    | Down | -4.14 | 0     | Down | Expressed protein                                       |
| Pc_TC113470 | -2.57 | 0.04  | Down | 0.81  | 0.41      |      | -1.97 | 0.19 |      | -2.7  | 0.04  | Down | eukaryotic initiation factor 4A-III                     |
| Pc_TC113472 | 0.66  | 0.49  |      | 1.82  | 0.04      | Up   | -0.43 | 0.79 |      | 0.16  | 0.92  |      | Expressed protein                                       |
| Pc_TC113487 | -0.08 | 0.89  |      | 0.54  | 0.39      |      | -2.17 | 0.05 | Down | -1.12 | 0.11  |      | Putative uncharacterized protein                        |
| Pc_TC113495 | -2.07 | 0.05  |      | 0.19  | 0.87      |      | -3.45 | 0.03 | Down | -4.33 | 0     | Down | Expressed protein                                       |
| Pc_TC113507 | 0.38  | 0.53  |      | 0.24  | 0.75      |      | -2.33 | 0.05 | Down | -0.69 | 0.37  |      | Uncharacterized protein                                 |
| Pc_TC113516 | 2.54  | 0     | Up   | 0     | 0         |      | 1.84  | 0.13 |      | 0.41  | 0.71  |      | 3-hydroxyacyl-CoA dehydrogenase family protein          |
| Pc_TC113521 | -2.17 | 0.11  |      | -2.19 | 0.14      |      | -1.29 | 0.41 |      | -3.62 | 0.02  | Down | cysteine-rich RLK (RECEPTOR-like protein kinase) 8      |
| Pc_TC113523 | -0.13 | 0.82  |      | 0.45  | 0.46      |      | -2.41 | 0.03 | Down | -1.95 | 0.01  | Down | Expressed protein                                       |
| Pc_TC113553 | -0.75 | 0.32  |      | -0.55 | 0.53      |      | 2.64  | 0.01 | Up   | 0.97  | 0.2   |      | Expressed protein                                       |
| Pc_TC113557 | -0.92 | 0.6   |      | 0     | 0.07      |      | 2.98  | 0.02 | Up   | 1.66  | 0.13  |      | Expressed protein                                       |
| Pc_TC113567 | -2.24 | ##### | Down | -0.7  | 0.22      |      | 0.01  | 1    |      | -0.23 | 0.7   |      | Uncharacterized protein                                 |
| Pc_TC113583 | 0.26  | 0.72  |      | 0.01  | 1         |      | -2.65 | 0.04 | Down | -2.65 | 0.01  | Down | Expressed protein                                       |
| Pc_TC113588 | -1.08 | 0.23  |      | -2.87 | 0.02      | Down | -0.35 | 0.79 |      | -0.2  | 0.86  |      | Senescence-associated protein (Fragment)                |
| Pc_TC113589 | -4.14 | 0     | Down | -1.11 | 0.23      |      | -2.72 | 0.04 | Down | -3.01 | 0     | Down | Expressed protein                                       |
| Pc_TC113594 | 0.54  | 0.29  |      | 0.25  | 0.69      |      | -2.34 | 0.03 | Down | -0.65 | 0.34  |      | Expressed protein                                       |
| Pc_TC113604 | -0.08 | 0.9   |      | 1.02  | 0.11      |      | -3.76 | 0    | Down | -1.81 | 0.02  | Down | Expressed protein                                       |
| Pc_TC113605 | -3.09 | 0.04  | Down | -3.11 | 0.06      |      | -1.21 | 0.45 |      | -1.74 | 0.19  |      | Expressed protein                                       |
| Pc_TC113608 | 1.96  | 0     | Up   | 0     | 4.13E-006 |      | 1.47  | 0.17 |      | 0.27  | 0.75  |      | Expressed protein                                       |
| Pc_TC113618 | -0.23 | 0.85  |      | 0.53  | 0.61      |      | -0.88 | 0.54 |      | -2.75 | 0.03  | Down | Expressed protein                                       |
| Pc_TC113619 | -0.21 | 0.88  |      | -0.15 | 0.94      |      | -1.37 | 0.36 |      | -3.83 | 0.01  | Down | Expressed protein                                       |
| Pc_TC113635 | 0.51  | 0.35  |      | 0.91  | 0.16      |      | -3.18 | 0.01 | Down | -1.47 | 0.05  | Down | Expressed protein                                       |
| Pc_TC113639 | -1.35 | 0.2   |      | -0.61 | 0.6       |      | -2.25 | 0.14 |      | -2.54 | 0.04  | Down | Expressed protein                                       |
| Pc_TC113641 | -3.73 | 0.05  | Down | -0.75 | 0.63      |      | -1.3  | 0.45 |      | -0.72 | 0.61  |      | Expressed protein                                       |
| Pc_TC113668 | -1.42 | 0.05  | Down | -0.97 | 0.22      |      | 0.09  | 0.95 |      | -0.32 | 0.69  |      | Expressed protein                                       |
| Pc_TC113687 | -2.22 | 0.01  | Down | -0.27 | 0.76      |      | 0.88  | 0.43 |      | 0.53  | 0.5   |      | Expressed protein                                       |
| Pc_TC113688 | 0.71  | 0.57  |      | 1.73  | 0.11      |      | 2.42  | 0.07 |      | 2.58  | 0.01  | Up   | Expressed protein                                       |
| Pc_TC113703 | -0.53 | 0.57  |      | 0.66  | 0.47      |      | -4.04 | 0.01 | Down | -2.5  | 0.03  | Down | Expressed protein                                       |
| Pc_TC113725 | 0.49  | 0.5   |      | 0.64  | 0.43      |      | -2.11 | 0.11 |      | -2.75 | 0.01  | Down | Expressed protein                                       |
| Pc_TC113755 | 0.42  | 0.65  |      | 0.61  | 0.55      |      | 0.2   | 0.91 |      | 1.86  | 0.03  | Up   | Putative uncharacterized protein                        |
| Pc_TC113763 | 1.66  | 0.05  | Up   | 0     | 0.01      |      | 1.84  | 0.15 |      | 1.15  | 0.25  |      | Expressed protein                                       |
| Pc_TC113766 | -0.38 | 0.68  |      | -1.15 | 0.27      |      | -2.71 | 0.06 |      | -3.26 | 0.01  | Down | Expressed protein                                       |
| Pc_TC113771 | 1.49  | 0.44  |      | 2.56  | 0.1       |      | 1.5   | 0.51 |      | 2.9   | 0.04  | Up   | Pentatricopeptide repeat (PPR-like) superfamily protein |
| Pc_TC113776 | -2.09 | 0.04  | Down | -0.3  | 0.78      |      | -0.02 | 1    |      | -0.59 | 0.55  |      | Expressed protein                                       |
| Pc_TC113779 | -0.09 | 0.86  |      | 0.03  | 0.96      |      | -1.15 | 0.26 |      | -1.32 | 0.05  | Down | Expressed protein                                       |
| Pc_TC113783 | 4.6   | 0     | Up   | 0     | 1         |      | 3.9   | 0.08 |      | 0     | 0.9   |      | Expressed protein                                       |
| Pc_TC113801 | 0.08  | 0.92  |      | 0.54  | 0.46      |      | -5.39 | 0    | Down | -3.27 | 0     | Down | Expressed protein                                       |
| Pc_TC113809 | 1.13  | 0.25  |      | 3.08  | 0         | Up   | -0.84 | 0.63 |      | 0.82  | 0.47  |      | Expressed protein                                       |
| Pc_TC113818 | -0.17 | 0.83  |      | -2.92 | 0         | Down | 1.94  | 0.07 |      | 0.54  | 0.49  |      | Expressed protein                                       |
| Pc_TC113841 | 0.76  | 0.33  |      | 2.14  | 0.01      | Up   | -2.54 | 0.08 |      | 1.1   | 0.2   |      | Os06g0484800 protein                                    |
| Pc_TC113847 | 0.43  | 0.48  |      | 1.36  | 0.04      | Up   | -0.65 | 0.56 |      | -0.82 | 0.29  |      | Putative uncharacterized protein                        |
| Pc_TC113881 | 0.08  | 1     |      | 0.54  | 0.85      |      | 3.69  | 0.01 | Up   | 1.39  | 0.36  |      | Expressed protein                                       |
| Pc_TC113886 | -0.62 | 0.51  |      | -0.03 | 1         |      | -1.78 | 0.2  |      | -2.46 | 0.03  | Down | Expressed protein                                       |
| Pc_TC113894 | -1.8  | 0.03  | Down | -2.12 | 0.03      | Down | -4.79 | 0    | Down | -2.94 | 0     | Down | Expressed protein                                       |

|             |       |       |      |       |           |      |       |           |      |       |       |      |                                                           |     |
|-------------|-------|-------|------|-------|-----------|------|-------|-----------|------|-------|-------|------|-----------------------------------------------------------|-----|
| Pc_TC113910 | -0.54 | 0.4   |      | -0.36 | 0.63      |      | -2.24 | 0.05      |      | -1.69 | 0.03  | Down | MEI2-like protein 5                                       |     |
| Pc_TC113918 | 1.34  | 0.02  | Up   | 0.77  | 0.26      |      | 0.46  | 0.67      |      | 0.67  | 0.35  |      | Expressed protein                                         |     |
| Pc_TC113930 | 0.41  | 0.47  |      | 1.77  | 0         | Up   | -0.58 | 0.59      |      | -0.44 | 0.55  |      | Expressed protein                                         |     |
| Pc_TC113945 | -0.66 | 0.72  |      | 0.91  | 0.5       |      | 2.14  | 0.12      |      | 2.43  | 0.02  | Up   | Expressed protein                                         |     |
| Pc_TC113956 | -0.07 | 0.87  |      | 0.87  | 0.09      |      | -1.87 | 0.06      |      | -2.02 | 0     | Down | Expressed protein                                         | HSF |
| Pc_TC113968 | 3.15  | 0     | Up   | 4.37  | 4.05E-006 | Up   | -0.3  | 0.95      |      | -0.18 | 1     |      | Expressed protein                                         |     |
| Pc_TC113969 | -0.06 | 0.89  |      | 1.07  | 0.03      | Up   | -3.9  | 0         | Down | -1.87 | 0     | Down | Expressed protein                                         |     |
| Pc_TC113977 | 0.7   | 0.19  |      | 0.75  | 0.24      |      | -2.34 | 0.04      | Down | -0.75 | 0.3   |      | Expressed protein                                         |     |
| Pc_TC113985 | 0.82  | 0.47  |      | 2.09  | 0.04      | Up   | 0     | 0.03      |      | 0     | 0.02  |      | Expressed protein                                         |     |
| Pc_TC113990 | -1.6  | 0.04  | Down | -0.48 | 0.57      |      | -2.17 | 0.08      |      | -0.89 | 0.3   |      | Ryanodine receptor                                        |     |
| Pc_TC114001 | 0.27  | 0.69  |      | 0.84  | 0.25      |      | -4.42 | 0         | Down | -2.45 | 0.01  | Down | Expressed protein                                         |     |
| Pc_TC114002 | 0.25  | 0.95  |      | 2.55  | 0.02      | Up   | -0.69 | 0.77      |      | -0.79 | 0.69  |      | Expressed protein                                         |     |
| Pc_TC114006 | 1.17  | 0.35  |      | 2.76  | 0.01      | Up   | -2.5  | 0.3       |      | -1.37 | 0.47  |      | Uncharacterized protein                                   |     |
| Pc_TC114009 | -0.58 | 0.63  |      | 1.57  | 0.1       |      | -3.16 | 0.08      |      | -4.62 | 0.01  | Down | Expressed protein                                         |     |
| Pc_TC114032 | 1.12  | 0.03  | Up   | 0.92  | 0.14      |      | -1.47 | 0.17      |      | -0.64 | 0.36  |      | Remorin family protein                                    |     |
| Pc_TC114033 | 0.53  | 0.14  |      | 0.38  | 0.42      |      | -1.91 | 0.04      | Down | -0.84 | 0.13  |      | Remorin family protein                                    |     |
| Pc_TC114055 | -1.32 | 0.04  | Down | -0.63 | 0.39      |      | 0.62  | 0.55      |      | -0.23 | 0.76  |      | Expressed protein                                         |     |
| Pc_TC114062 | -7.95 | ##### | Down | -6.97 | 6.00E-015 | Down | -7.2  | 9.32E-008 | Down | -5.7  | ##### | Down | GTP binding Elongation factor Tu family protein           |     |
| Pc_TC114065 | -2.08 | 0.02  | Down | -2.8  | 0.01      | Down | 1.85  | 0.09      |      | 0.57  | 0.47  |      | Expressed protein                                         |     |
| Pc_TC114068 | -1.65 | 0.03  | Down | -0.25 | 0.76      |      | 0.16  | 0.89      |      | -0.31 | 0.7   |      | Expressed protein                                         |     |
| Pc_TC114082 | -0.57 | 0.6   |      | 1.98  | 0.02      | Up   | -1.82 | 0.22      |      | 0.19  | 0.88  |      | Expressed protein                                         |     |
| Pc_TC114092 | 0.19  | 0.8   |      | 0.89  | 0.25      |      | 0     | 8.44E-005 |      | -1.81 | 0.05  | Down | Expressed protein                                         |     |
| Pc_TC114097 | -1    | 0.41  |      | -0.19 | 0.92      |      | -3.74 | 0.05      | Down | -0.62 | 0.62  |      | Expressed protein                                         |     |
| Pc_TC114113 | -0.89 | 0.27  |      | -0.29 | 0.76      |      | -2.17 | 0.1       |      | -1.96 | 0.04  | Down | Expressed protein                                         |     |
| Pc_TC114119 | -3.09 | 0.04  | Down | -0.79 | 0.56      |      | -1.08 | 0.49      |      | -1.74 | 0.19  |      | Expressed protein                                         |     |
| Pc_TC114131 | -2.98 | 0.02  | Down | -0.59 | 0.62      |      | -0.1  | 0.97      |      | 0.03  | 1     |      | Expressed protein                                         |     |
| Pc_TC114134 | -0.39 | 0.77  |      | -0.65 | 0.64      |      | -2.67 | 0.13      |      | -3.54 | 0.03  | Down | Expressed protein                                         |     |
| Pc_TC114142 | -0.95 | 0.24  |      | -1.44 | 0.14      |      | -1.92 | 0.14      |      | -2.46 | 0.01  | Down | Expressed protein                                         |     |
| Pc_TC114158 | -4.73 | 0     | Down | -2.43 | 0.06      |      | -1.3  | 0.36      |      | -2.37 | 0.05  | Down | Putative uncharacterized protein                          |     |
| Pc_TC114160 | -0.43 | 0.68  |      | -2.7  | 0.05      | Down | 0.56  | 0.67      |      | -1.54 | 0.17  |      | Expressed protein                                         |     |
| Pc_TC114168 | 3.17  | 0.04  | Up   | 3.15  | 0.06      |      | 4.81  | 0         | Up   | 5.02  | ##### | Up   | Expressed protein                                         |     |
| Pc_TC114179 | -3.24 | 0.01  | Down | -1.39 | 0.22      |      | -5.4  | 0.01      | Down | -2.96 | 0.02  | Down | light-harvesting chlorophyll-protein complex I subunit A4 |     |
| Pc_TC114183 | 0.54  | 0.75  |      | 2.52  | 0.02      | Up   | 0     | 0.08      |      | -1.37 | 0.47  |      | Expressed protein                                         |     |
| Pc_TC114186 | -0.75 | 0.57  |      | 1.1   | 0.3       |      | -3.5  | 0.08      |      | -3.37 | 0.04  | Down | Expressed protein                                         |     |
| Pc_TC114195 | 2.66  | 0.03  | Up   | 3.42  | 0.01      | Up   | -1.5  | 0.66      |      | 0.63  | 0.82  |      | Expressed protein                                         |     |
| Pc_TC114196 | -0.51 | 0.44  |      | -0.94 | 0.23      |      | -2.29 | 0.05      |      | -1.68 | 0.04  | Down | Expressed protein                                         |     |
| Pc_TC114202 | 0     | 0.01  |      | 0     | 0.01      |      | -4.58 | 0.03      | Down | 0     | 0     |      | Expressed protein                                         |     |
| Pc_TC114204 | 3.25  | 0.03  | Up   | 0     | 0.67      |      | 1.96  | 0.42      |      | -1.37 | 0.88  |      | importin alpha isoform 2                                  |     |
| Pc_TC114222 | -0.67 | 0.48  |      | -0.36 | 0.75      |      | -2.5  | 0.09      |      | -4.37 | 0     | Down | Expressed protein                                         |     |
| Pc_TC114239 | -2.73 | 0.27  |      | 0.57  | 0.77      |      | 3.12  | 0.02      | Up   | 2.84  | 0.01  | Up   | Expressed protein                                         |     |
| Pc_TC114241 | 2.27  | 0     | Up   | 0     | 0         |      | 1.62  | 0.15      |      | 0.59  | 0.5   |      | Ribosomal L29e protein family                             |     |
| Pc_TC114245 | -0.92 | 0.32  |      | -2.71 | 0.03      | Down | 0.42  | 0.75      |      | 0.29  | 0.77  |      | Uncharacterized protein                                   |     |
| Pc_TC114247 | 0.76  | 0.35  |      | -0.85 | 0.44      |      | 3.79  | 0         | Up   | 1.78  | 0.03  | Up   | Expressed protein                                         |     |
| Pc_TC114251 | 0.64  | 0.22  |      | 1.24  | 0.04      | Up   | -2.75 | 0.02      | Down | -0.65 | 0.36  |      | Expressed protein                                         |     |
| Pc_TC114253 | -1.35 | 0.16  |      | -3.07 | 0.02      | Down | -1.82 | 0.19      |      | -5.5  | 0     | Down | Expressed protein                                         |     |
| Pc_TC114259 | -0.59 | 0.26  |      | -1.82 | 0.01      | Down | 1.6   | 0.09      |      | 0.76  | 0.22  |      | Expressed protein                                         |     |
| Pc_TC114277 | 0.89  | 0.3   |      | 2.53  | 0         | Up   | 0     | 0         |      | -3.96 | 0.01  | Down | Expressed protein                                         |     |
| Pc_TC114280 | -2.21 | 0.02  | Down | -1.01 | 0.3       |      | 3.55  | 0         | Up   | 2.08  | 0.01  | Up   | Expressed protein                                         |     |
| Pc_TC114285 | 0.57  | 0.35  |      | 0.71  | 0.32      |      | -0.27 | 0.81      |      | 1.58  | 0.02  | Up   | Expressed protein                                         |     |
| Pc_TC114288 | -1.85 | 0.15  |      | -1.38 | 0.31      |      | -2.16 | 0.19      |      | -3.04 | 0.04  | Down | Expressed protein                                         |     |
| Pc_TC114315 | 2.66  | 0.03  | Up   | 0     | 0.36      |      | 2.71  | 0.1       |      | 0.95  | 0.64  |      | endoribonuclease L-PSP family protein                     |     |
| Pc_TC114344 | -1.63 | 0.05  | Down | -0.74 | 0.41      |      | 0.13  | 0.92      |      | -0.23 | 0.79  |      | Expressed protein                                         |     |
| Pc_TC114359 | 0.06  | 0.94  |      | -1.32 | 0.11      |      | 2.96  | 0         | Up   | 1.87  | 0.01  | Up   | Expressed protein                                         |     |
| Pc_TC114364 | 0.4   | 0.74  |      | 0.06  | 1         |      | 1.5   | 0.25      |      | 2.03  | 0.03  | Up   | Os01g0278600 protein                                      |     |
| Pc_TC114372 | 5.13  | ##### | Up   | 0     | 0.03      |      | 3.55  | 0         | Up   | 1.25  | 0.25  |      | Uncharacterized protein                                   |     |
| Pc_TC114375 | 0.25  | 0.82  |      | 0.76  | 0.44      |      | -0.08 | 0.98      |      | -2.64 | 0.04  | Down | Expressed protein                                         |     |
| Pc_TC114393 | 0.89  | 0.68  |      | 1.23  | 0.53      |      | 4.1   | 0.01      | Up   | 3.35  | 0.01  | Up   | Expressed protein                                         |     |
| Pc_TC114410 | -0.63 | 0.49  |      | -4.11 | 0         | Down | -0.81 | 0.54      |      | -0.54 | 0.58  |      | Uncharacterized protein                                   |     |
| Pc_TC114424 | 1.19  | 0.06  |      | 1.36  | 0.07      |      | -5.4  | 0         | Down | 0     | ##### |      | Uncharacterized protein                                   |     |
| Pc_TC114438 | 0.15  | 0.85  |      | 0.34  | 0.68      |      | 0     | 9.81E-005 |      | -4.28 | 0     | Down | Peritrophin-15                                            |     |
| Pc_TC114443 | -3.28 | 0     | Down | -0.05 | 0.99      |      | -1.1  | 0.4       |      | -2.56 | 0.02  | Down | Expressed protein                                         |     |
| Pc_TC114449 | 0.35  | 0.75  |      | -0.38 | 0.79      |      | -3.74 | 0.05      | Down | -0.82 | 0.51  |      | Expressed protein                                         |     |

|             |       |       |      |       |           |      |       |      |      |       |       |      |                                                        |
|-------------|-------|-------|------|-------|-----------|------|-------|------|------|-------|-------|------|--------------------------------------------------------|
| Pc_TC114466 | 0.03  | 0.99  |      | 0.47  | 0.53      |      | -2.32 | 0.06 |      | -1.7  | 0.04  | Down | Expressed protein                                      |
| Pc_TC114479 | 3.08  | 0.01  | Up   | -0.36 | 1         |      | 2.93  | 0.07 |      | 1.87  | 0.21  |      | P-glycoprotein 12                                      |
| Pc_TC114495 | 0.58  | 0.37  |      | -0.2  | 0.82      |      | 0.85  | 0.44 |      | 1.56  | 0.03  | Up   | Expressed protein                                      |
| Pc_TC114507 | -2.51 | 0.03  | Down | -2.53 | 0.05      | Down | -2.6  | 0.09 |      | -2.7  | 0.03  | Down | Chitin deacetylase 1                                   |
| Pc_TC114508 | 2.31  | 0     | Up   | 0     | 0         |      | 2.09  | 0.06 |      | 0.94  | 0.27  |      | Amyrel                                                 |
| Pc_TC114525 | -0.95 | 0.26  |      | 0.8   | 0.34      |      | -2.4  | 0.08 |      | -2.28 | 0.03  | Down | Expressed protein                                      |
| Pc_TC114526 | -0.42 | 0.52  |      | 0.14  | 0.86      |      | -1.22 | 0.28 |      | -1.93 | 0.02  | Down | Expressed protein                                      |
| Pc_TC114531 | 0.45  | 0.6   |      | -0.2  | 0.88      |      | 2.79  | 0.01 | Up   | 1.37  | 0.11  |      | Expressed protein                                      |
| Pc_TC114534 | 2.79  | 0     | Up   | 0     | 0.03      |      | 2.46  | 0.06 |      | 0.25  | 0.89  |      | RNAse I inhibitor protein 2                            |
| Pc_TC114536 | -1.13 | 0.26  |      | -0.85 | 0.44      |      | -3.08 | 0.05 | Down | -1.28 | 0.23  |      | Expressed protein                                      |
| Pc_TC114548 | -0.74 | 0.23  |      | -0.12 | 0.87      |      | -2.01 | 0.07 |      | -3.19 | 0     | Down | Putative uncharacterized protein                       |
| Pc_TC114549 | -1.76 | 0.06  |      | -2.78 | 0.02      | Down | -0.79 | 0.53 |      | 0.84  | 0.31  |      | Putative uncharacterized protein                       |
| Pc_TC114550 | 0.32  | 0.37  |      | 0.39  | 0.38      |      | -2.15 | 0.02 | Down | -0.9  | 0.1   |      | Expressed protein                                      |
| Pc_TC114557 | 0.5   | 0.41  |      | 1.31  | 0.05      |      | -2.89 | 0.02 | Down | -0.66 | 0.39  |      | Expressed protein                                      |
| Pc_TC114560 | -1.02 | 0.07  |      | 0     | 2.94E-012 |      | -1.56 | 0.14 |      | -2.97 | 0     | Down | Expressed protein                                      |
| Pc_TC114566 | 0.13  | 0.92  |      | 0.5   | 0.62      |      | -1.5  | 0.29 |      | -2.37 | 0.05  | Down | nuclear matrix protein-related                         |
| Pc_TC114567 | 0.63  | 0.4   |      | 0.95  | 0.25      |      | -3.92 | 0.01 | Down | -2.99 | 0.01  | Down | Expressed protein                                      |
| Pc_TC114569 | -4.24 | 0.01  | Down | -2.26 | 0.12      |      | -0.06 | 1    |      | -0.7  | 0.57  |      | Expressed protein                                      |
| Pc_TC114571 | 0.02  | 1     |      | 0.06  | 1         |      | -1.67 | 0.25 |      | -2.81 | 0.03  | Down | Expressed protein                                      |
| Pc_TC114575 | 0.33  | 0.67  |      | 0.86  | 0.29      |      | -3.05 | 0.03 | Down | -0.02 | 1     |      | Expressed protein                                      |
| Pc_TC114599 | -0.14 | 0.75  |      | 0.6   | 0.25      |      | -1.88 | 0.06 |      | -1.46 | 0.02  | Down | Expressed protein                                      |
| Pc_TC114618 | 0.91  | 0.01  |      | 0.77  | 0.11      |      | -1.89 | 0.05 | Down | 0.17  | 0.76  |      | Uncharacterized protein                                |
| Pc_TC114622 | -0.34 | 1     |      | 0     | 0.36      |      | 3.23  | 0.04 | Up   | 2.08  | 0.15  |      | Expressed protein                                      |
| Pc_TC114625 | 1.97  | 0.04  | Up   | 0     | 0.07      |      | 1.31  | 0.38 |      | 1.63  | 0.14  |      | Uncharacterized protein                                |
| Pc_TC114630 | 2.46  | 0.04  | Up   | 2.38  | 0.07      |      | 0.18  | 1    |      | 1.47  | 0.32  |      | Uncharacterized protein                                |
| Pc_TC114651 | 0.21  | 0.87  |      | 0.52  | 0.64      |      | 0     | 0.01 |      | -3.77 | 0.01  | Down | Expressed protein                                      |
| Pc_TC114659 | 0.45  | 0.52  |      | 0.48  | 0.55      |      | -2.62 | 0.05 | Down | -1.14 | 0.2   |      | Expressed protein                                      |
| Pc_TC114664 | -0.11 | 0.94  |      | 0.64  | 0.49      |      | -3.5  | 0.03 | Down | -1.57 | 0.14  |      | Expressed protein                                      |
| Pc_TC114679 | -1.37 | 0.01  | Down | 0.18  | 0.77      |      | -0.27 | 0.79 |      | -0.34 | 0.61  |      | helicases                                              |
| Pc_TC114704 | 0.92  | 0.22  |      | 1.2   | 0.16      |      | 0     | 0    |      | -2.46 | 0.03  | Down | Expressed protein                                      |
| Pc_TC114728 | 0.49  | 0.64  |      | 0.93  | 0.38      |      | 0     | 0.01 |      | -4.54 | 0.01  | Down | Expressed protein                                      |
| Pc_TC114732 | 0.14  | 0.79  |      | -0.26 | 0.69      |      | -2.93 | 0.01 | Down | -2.08 | 0     | Down | Expressed protein                                      |
| Pc_TC114760 | 0.46  | 0.3   |      | 0.51  | 0.35      |      | -3.49 | 0    | Down | -1.88 | 0     | Down | Expressed protein                                      |
| Pc_TC114777 | -0.21 | 0.88  |      | -0.59 | 0.64      |      | -2.15 | 0.17 |      | -2.83 | 0.04  | Down | H0821G03.10 protein                                    |
| Pc_TC114790 | -1.53 | 0.06  |      | -2.99 | 0.01      | Down | -6.35 | 0    | Down | -3.23 | 0     | Down | Expressed protein                                      |
| Pc_TC114802 | 0.82  | 0.63  |      | 2.96  | 0.01      | Up   | 0.92  | 0.64 |      | -0.37 | 0.93  |      | Expressed protein                                      |
| Pc_TC114807 | -0.76 | 0.09  |      | -0.25 | 0.64      |      | -0.75 | 0.43 |      | -1.22 | 0.05  | Down | disease resistance family protein / LRR family protein |
| Pc_TC114814 | -1.65 | 0     | Down | -1.8  | 0.01      | Down | 1.37  | 0.15 |      | -0.16 | 0.8   |      | Expressed protein                                      |
| Pc_TC114818 | -0.47 | 0.42  |      | -0.78 | 0.27      |      | 2.02  | 0.04 | Up   | 1.5   | 0.02  | Up   | Expressed protein                                      |
| Pc_TC114833 | -1.24 | 0.37  |      | -0.26 | 0.89      |      | 2.65  | 0.03 | Up   | -1.47 | 0.29  |      | Expressed protein                                      |
| Pc_TC114869 | -0.77 | 0.45  |      | -0.61 | 0.6       |      | 2.62  | 0.02 | Up   | 1.57  | 0.07  |      | Expressed protein                                      |
| Pc_TC114873 | 0.45  | 0.23  |      | 0.94  | 0.04      |      | -4.07 | 0    | Down | -2.22 | 0     | Down | Uncharacterized protein                                |
| Pc_TC114876 | 1.33  | 0.14  |      | 2.12  | 0.02      | Up   | 0     | 0.01 |      | 0     | 0.01  |      | Uncharacterized protein                                |
| Pc_TC114882 | 0.44  | 0.5   |      | 0.99  | 0.17      |      | -6.78 | 0    | Down | -5.66 | ##### | Down | Expressed protein                                      |
| Pc_TC114886 | -0.79 | 0.36  |      | 0.82  | 0.33      |      | 0     | 0    |      | -4.18 | 0     | Down | Expressed protein                                      |
| Pc_TC114892 | 1.3   | 0.04  | Up   | 1.14  | 0.13      |      | -1.36 | 0.27 |      | 0.93  | 0.23  |      | Expressed protein                                      |
| Pc_TC114904 | 1.94  | 0.02  | Up   | 0     | 0.02      |      | 1.7   | 0.2  |      | 0.14  | 0.96  |      | BTB/POZ domain-containing protein                      |
| Pc_TC114917 | -0.23 | 0.81  |      | -0.43 | 0.67      |      | 0     | 0    |      | -4.77 | 0     | Down | Expressed protein                                      |
| Pc_TC114918 | -1.95 | 0.03  | Down | -2.75 | 0.01      | Down | 2.55  | 0.02 | Up   | -0.04 | 0.99  |      | cysteine-rich RLK (RECEPTOR-like protein kinase) 8     |
| Pc_TC114923 | 0.18  | 0.88  |      | 0.3   | 0.79      |      | -3.67 | 0.03 | Down | -1.43 | 0.2   |      | Expressed protein                                      |
| Pc_TC114925 | 1.66  | 0.28  |      | 0.06  | 1         |      | -0.17 | 1    |      | 3.15  | 0.01  | Up   | Expressed protein                                      |
| Pc_TC114944 | 0.77  | 0.49  |      | 2.17  | 0.03      | Up   | 0.56  | 0.73 |      | 1.28  | 0.23  |      | Expressed protein                                      |
| Pc_TC114950 | 0.13  | 0.92  |      | 0.64  | 0.5       |      | -5.4  | 0.01 | Down | -5.28 | 0     | Down | Expressed protein                                      |
| Pc_TC114978 | -0.35 | 0.67  |      | 0.45  | 0.59      |      | -2.36 | 0.08 |      | -2.05 | 0.04  | Down | Expressed protein                                      |
| Pc_TC114982 | 1.71  | 0.03  | Up   | 0     | 0         |      | 0.83  | 0.53 |      | -0.25 | 0.85  |      | Expressed protein                                      |
| Pc_TC114987 | -0.24 | 0.82  |      | 0.2   | 0.87      |      | 0.3   | 0.83 |      | 2.48  | 0     | Up   | Expressed protein                                      |
| Pc_TC115004 | -0.09 | 0.95  |      | 1.25  | 0.13      |      | -2.5  | 0.08 |      | -2.22 | 0.04  | Down | Expressed protein                                      |
| Pc_TC115026 | 0.68  | 0.39  |      | 0.91  | 0.3       |      | -3.63 | 0.02 | Down | -2.5  | 0.03  | Down | Expressed protein                                      |
| Pc_TC115027 | -0.53 | 0.59  |      | 1.27  | 0.15      |      | 0.4   | 0.77 |      | -3.65 | 0.01  | Down | GTP-binding protein                                    |
| Pc_TC115028 | 0     | ##### |      | 0     | 6.03E-006 |      | -4.47 | 0    | Down | 0     | ##### |      | Expressed protein                                      |
| Pc_TC115030 | -2.32 | 0.02  | Down | -1.45 | 0.17      |      | 0.27  | 0.84 |      | -0.06 | 0.98  |      | Expressed protein                                      |
| Pc_TC115040 | 0.38  | 0.54  |      | 0.3   | 0.69      |      | -2.68 | 0.03 | Down | -1.56 | 0.05  |      | Expressed protein                                      |



|             |       |      |      |       |           |      |       |      |      |       |       |      |                                                              |
|-------------|-------|------|------|-------|-----------|------|-------|------|------|-------|-------|------|--------------------------------------------------------------|
| Pc_TC115041 | -1.51 | 0.54 |      | -0.53 | 0.89      |      | 3.65  | 0.01 | Up   | 1.63  | 0.22  |      | Expressed protein                                            |
| Pc_TC115060 | 1.37  | 0.04 | Up   | 0     | 0         |      | 1.31  | 0.25 |      | 0.36  | 0.69  |      | alpha/beta-Hydrolases superfamily protein                    |
| Pc_TC115063 | -0.08 | 0.09 |      | -1.57 | 0.03      | Down | 0.09  | 0.94 |      | -1.42 | 0.05  |      | Uncharacterized protein                                      |
| Pc_TC115064 | -0.26 | 0.83 |      | 2.5   | 0         | Up   | 3.42  | 0    | Up   | 2.45  | 0     | Up   | Uncharacterized protein                                      |
| Pc_TC115065 | -1.76 | 0.01 | Down | -1.36 | 0.07      |      | -0.98 | 0.36 |      | -0.46 | 0.52  |      | Expressed protein                                            |
| Pc_TC115068 | 1.85  | 0    | Up   | 0     | 5.43E-005 |      | 1.65  | 0.14 |      | 0.12  | 0.92  |      | Expressed protein                                            |
| Pc_TC115083 | 0.27  | 0.61 |      | 0.83  | 0.17      |      | -2.55 | 0.02 | Down | -0.61 | 0.38  |      | Expressed protein                                            |
| Pc_TC115110 | -0.56 | 0.4  |      | -0.33 | 0.68      |      | -1.36 | 0.24 |      | -2.08 | 0.01  | Down | Expressed protein                                            |
| Pc_TC115112 | 0.08  | 0.97 |      | 0.45  | 0.66      |      | 0     | 0    |      | -3.23 | 0.01  | Down | Expressed protein                                            |
| Pc_TC115135 | -2.8  | 0.04 | Down | -3.4  | 0.03      | Down | -0.26 | 0.88 |      | -0.44 | 0.71  |      | Expressed protein                                            |
| Pc_TC115139 | 0.08  | 0.95 |      | 0.45  | 0.62      |      | 0     | 0    |      | -3.45 | 0     | Down | Expressed protein                                            |
| Pc_TC115143 | -1.74 | 0    | Down | -2.36 | 0         | Down | -4.5  | 0    | Down | -3.62 | ##### | Down | Expressed protein                                            |
| Pc_TC115155 | -1.62 | 0.06 |      | -2.18 | 0.03      | Down | -0.61 | 0.62 |      | -0.99 | 0.27  |      | Os01g0507000 protein (Fragment)                              |
| Pc_TC115170 | 0.38  | 0.79 |      | 0.06  | 1         |      | 0     | 0.03 |      | -4.08 | 0.04  | Down | Os01g0158100 protein                                         |
| Pc_TC115177 | 0.61  | 0.47 |      | 0.37  | 0.72      |      | -3.35 | 0.04 | Down | -1.06 | 0.32  |      | Expressed protein                                            |
| Pc_TC115181 | 0.61  | 0.42 |      | 1.62  | 0.04      | Up   | -2.6  | 0.06 |      | -3.8  | 0     | Down | Expressed protein                                            |
| Pc_TC115184 | 0.28  | 0.72 |      | -0.3  | 0.76      |      | 2.22  | 0.04 | Up   | 1.22  | 0.12  |      | Expressed protein                                            |
| Pc_TC115185 | -1.84 | 0.04 | Down | -0.51 | 0.58      |      | 0.25  | 0.85 |      | -0.32 | 0.73  |      | Expressed protein                                            |
| Pc_TC115196 | -4.97 | 0    | Down | -1.66 | 0.14      |      | 0.48  | 0.71 |      | -0.61 | 0.55  |      | Expressed protein                                            |
| Pc_TC115216 | -0.35 | 0.67 |      | 0.19  | 0.84      |      | -3.58 | 0.01 | Down | -2.88 | 0.01  | Down | Uncharacterized protein                                      |
| Pc_TC115226 | -4.09 | 0.02 | Down | -0.53 | 0.71      |      | -0.14 | 0.96 |      | -0.54 | 0.67  |      | Uncharacterized protein                                      |
| Pc_TC115234 | 2.83  | 0    | Up   | 0     | 0.15      |      | 2.83  | 0.04 | Up   | 2.1   | 0.07  |      | Enoyl-CoA hydratase/isomerase family                         |
| Pc_TC115242 | -1.28 | 0.08 |      | -2.12 | 0.02      | Down | 0.3   | 0.79 |      | -0.86 | 0.3   |      | Expressed protein                                            |
| Pc_TC115249 | 0.54  | 0.29 |      | 0.74  | 0.23      |      | -2.17 | 0.05 | Down | -1.26 | 0.07  |      | Expressed protein                                            |
| Pc_TC115287 | -2.94 | 0    | Down | -0.71 | 0.4       |      | 0.01  | 1    |      | -1.28 | 0.13  |      | Expressed protein                                            |
| Pc_TC115309 | -0.18 | 0.82 |      | 0.67  | 0.38      |      | -2.63 | 0.04 | Down | -1.51 | 0.09  |      | Expressed protein                                            |
| Pc_TC115331 | -0.38 | 0.66 |      | -0.23 | 0.82      |      | -3.96 | 0.01 | Down | -2.83 | 0.01  | Down | Expressed protein                                            |
| Pc_TC115346 | 0     | 0    |      | -3.7  | 0.01      | Down | -2.25 | 0.14 |      | 0     | 0     |      | Ribosomal L29e protein family                                |
| Pc_TC115350 | -2.43 | 0    | Down | -1.4  | 0.11      |      | -0.95 | 0.42 |      | -0.17 | 0.84  |      | Expressed protein                                            |
| Pc_TC115353 | -2.02 | 0.06 |      | -0.46 | 0.68      |      | -1.4  | 0.32 |      | -2.28 | 0.05  | Down | Expressed protein                                            |
| Pc_TC115369 | 0.66  | 0.97 |      | 3.31  | 0.04      | Up   | -0.5  | 1    |      | 0.21  | 1     |      | heat shock protein 60                                        |
| Pc_TC115374 | 0.25  | 0.76 |      | 0.81  | 0.32      |      | -5.08 | 0    | Down | -2.64 | 0.01  | Down | Expressed protein                                            |
| Pc_TC115376 | 0.42  | 0.73 |      | 2.13  | 0.03      | Up   | -2.08 | 0.24 |      | -1.7  | 0.23  |      | Expressed protein                                            |
| Pc_TC115377 | -1.31 | 0.26 |      | 0.25  | 0.85      |      | -3.89 | 0.04 | Down | -1.45 | 0.24  |      | Expressed protein                                            |
| Pc_TC115379 | 1.66  | 0    | Up   | 0     | 2.11E-011 |      | 1.86  | 0.06 |      | -0.03 | 0.97  |      | acyl-CoA-binding protein 6                                   |
| Pc_TC115383 | -1.67 | 0.05 | Down | -1.02 | 0.26      |      | 0.94  | 0.4  |      | 0.77  | 0.33  |      | putative Ty3-gypsy sub-class                                 |
| Pc_TC115419 | -2.98 | 0.02 | Down | -2.59 | 0.06      |      | -3.56 | 0.04 | Down | -5.02 | 0     | Down | Expressed protein                                            |
| Pc_TC115435 | 1.38  | 0.04 | Up   | 0.87  | 0.29      |      | -2.53 | 0.07 |      | 0.04  | 0.99  |      | Expressed protein                                            |
| Pc_TC115445 | 0.69  | 0.13 |      | 0.85  | 0.13      |      | -3.06 | 0.01 | Down | -1.67 | 0.01  | Down | Expressed protein                                            |
| Pc_TC115453 | -2.05 | 0.02 | Down | -1.13 | 0.24      |      | -1.76 | 0.17 |      | -1.05 | 0.26  |      | Expressed protein                                            |
| Pc_TC115458 | 1.23  | 0.04 | Up   | -0.4  | 0.63      |      | 0.38  | 0.74 |      | 2.54  | 0     | Up   | Expressed protein                                            |
| Pc_TC115460 | 4.4   | 0    | Up   | 0     | 0.67      |      | 3.5   | 0.06 |      | -0.37 | 1     |      | Expressed protein                                            |
| Pc_TC115464 | -0.74 | 0.31 |      | -2.05 | 0.03      | Down | -0.48 | 0.69 |      | -0.09 | 0.93  |      | Expressed protein                                            |
| Pc_TC115476 | 2.17  | 0.03 | Up   | 0     | 0.11      |      | 2.03  | 0.16 |      | 0.21  | 0.97  |      | Expressed protein                                            |
| Pc_TC115484 | 0.16  | 0.83 |      | 0.82  | 0.28      |      | -3.41 | 0.01 | Down | -1.25 | 0.15  |      | Expressed protein                                            |
| Pc_TC115501 | -0.01 | 1    |      | 1.34  | 0.08      |      | -2.9  | 0.03 | Down | -2.4  | 0.02  | Down | Expressed protein                                            |
| Pc_TC115521 | 0.28  | 0.65 |      | 0.64  | 0.36      |      | -2.17 | 0.07 |      | -2.57 | 0     | Down | Expressed protein                                            |
| Pc_TC115529 | 0     | 0    |      | 0     | 0         |      | 3.04  | 0.01 | Up   | 0     | 0     |      | Expressed protein                                            |
| Pc_TC115533 | -1.42 | 0.28 |      | -0.22 | 0.91      |      | -2.58 | 0.14 |      | -3.46 | 0.03  | Down | Expressed protein                                            |
| Pc_TC115546 | 0.01  | 1    |      | 1.38  | 0.14      |      | -3.96 | 0.03 | Down | -2.03 | 0.11  |      | Os01g0884500 protein                                         |
| Pc_TC115550 | -0.31 | 0.57 |      | 0.56  | 0.36      |      | -1.93 | 0.07 |      | -1.47 | 0.04  | Down | cysteine-rich RLK (RECEPTOR-like protein kinase) 8           |
| Pc_TC115553 | 3.6   | 0.01 | Up   | 0     | 0.67      |      | 2.83  | 0.16 |      | 1.21  | 0.69  |      | Expressed protein                                            |
| Pc_TC115556 | 0.27  | 0.71 |      | 0.17  | 0.85      |      | -4.52 | 0    | Down | -2.31 | 0.01  | Down | Phosphoglycerate mutase, 2,3-bisphosphoglycerate-independent |
| Pc_TC115581 | -0.01 | 1    |      | 0.59  | 0.34      |      | -1.82 | 0.09 |      | -1.44 | 0.04  | Down | Expressed protein                                            |
| Pc_TC115594 | -0.31 | 0.68 |      | -0.08 | 0.95      |      | -1.88 | 0.13 |      | -2.76 | 0     | Down | Expressed protein                                            |
| Pc_TC115614 | 2.93  | 0    | Up   | 0     | 0.07      |      | 2.14  | 0.12 |      | 1.06  | 0.39  |      | Expressed protein                                            |
| Pc_TC115619 | -3.09 | 0.04 | Down | -3.11 | 0.06      |      | -1.34 | 0.4  |      | -1.54 | 0.24  |      | Expressed protein                                            |
| Pc_TC115625 | 0.16  | 0.88 |      | 0.6   | 0.51      |      | -4.63 | 0.01 | Down | -1.5  | 0.15  |      | Expressed protein                                            |
| Pc_TC115627 | 0.77  | 0.43 |      | -0.02 | 1         |      | 2.55  | 0.04 | Up   | 2.01  | 0.03  | Up   | Expressed protein                                            |
| Pc_TC115635 | 0.99  | 0.06 |      | 0.81  | 0.2       |      | -3.03 | 0.01 | Down | -1.12 | 0.12  |      | Expressed protein                                            |
| Pc_TC115667 | 1.66  | 0.19 |      | 2.56  | 0.03      | Up   | 1.67  | 0.31 |      | 0.95  | 0.55  |      | Uncharacterized protein                                      |
| Pc_TC115673 | 0.58  | 0.46 |      | -4.11 | 0         | Down | 1.71  | 0.14 |      | -0.64 | 0.52  |      | Expressed protein                                            |

|             |       |       |      |       |           |      |       |      |      |       |       |      |                                                           |
|-------------|-------|-------|------|-------|-----------|------|-------|------|------|-------|-------|------|-----------------------------------------------------------|
| Pc_TC115687 | -0.31 | 0.68  |      | 0.9   | 0.23      |      | -3.01 | 0.02 | Down | -1.71 | 0.06  |      | Expressed protein                                         |
| Pc_TC115690 | 3.1   | 0     | Up   | 0     | 0.11      |      | 1.2   | 0.46 |      | 0.21  | 0.97  |      | Proteasome maturation factor UMP1                         |
| Pc_TC115716 | -0.48 | 0.53  |      | -0.87 | 0.33      |      | -5.38 | 0    | Down | -1.8  | 0.05  |      | Expressed protein                                         |
| Pc_TC115719 | 1.53  | 0.02  | Up   | 0     | 8.53E-005 |      | 3.26  | 0    | Up   | -0.41 | 0.67  |      | farnesyl diphosphate synthase 1                           |
| Pc_TC115727 | -1.08 | 0.12  |      | -2.03 | 0.02      | Down | 2.3   | 0.03 | Up   | 0.73  | 0.31  |      | Expressed protein                                         |
| Pc_TC115739 | -0.72 | 0.49  |      | 0.88  | 0.35      |      | -4.2  | 0.02 | Down | -1.49 | 0.19  |      | Uncharacterized protein                                   |
| Pc_TC115741 | 0.94  | 0.06  |      | 0.91  | 0.14      |      | -2.27 | 0.04 | Down | -0.86 | 0.22  |      | Expressed protein                                         |
| Pc_TC115748 | -4.09 | 0.02  | Down | -1.53 | 0.28      |      | 1.19  | 0.37 |      | -1.37 | 0.29  |      | Expressed protein                                         |
| Pc_TC115763 | -2.92 | 0.07  |      | -0.13 | 0.97      |      | 0.83  | 0.56 |      | 1.89  | 0.04  | Up   | Expressed protein                                         |
| Pc_TC115780 | 0.21  | 0.71  |      | 0.42  | 0.51      |      | -4.97 | 0    | Down | -2.04 | 0.01  | Down | Expressed protein                                         |
| Pc_TC115781 | -2.92 | 0.07  |      | 1.15  | 0.28      |      | 0     | 0.01 |      | -4.37 | 0.02  | Down | Expressed protein                                         |
| Pc_TC115804 | 2.28  | 0     | Up   | 0     | 0         |      | 1.59  | 0.17 |      | 0.63  | 0.49  |      | Expressed protein                                         |
| Pc_TC115821 | -0.29 | 0.71  |      | 1.07  | 0.16      |      | 0     | 0    |      | -4.62 | 0     | Down | Expressed protein                                         |
| Pc_TC115833 | 0.56  | 0.62  |      | 2.15  | 0.02      | Up   | -0.23 | 0.92 |      | -1.28 | 0.35  |      | Translation protein SH3-like family protein               |
| Pc_TC115837 | 2.23  | 0.04  | Up   | 1.57  | 0.24      |      | 1.87  | 0.22 |      | 1.86  | 0.12  |      | TTF-type zinc finger protein with HAT dimerisation domain |
| Pc_TC115852 | 0.42  | 0.54  |      | 1.52  | 0.03      | Up   | -2.23 | 0.08 |      | 0.06  | 0.96  |      | Expressed protein                                         |
| Pc_TC115863 | -1.02 | 0.45  |      | 0     | 0.02      |      | 0     | 0.02 |      | -4.28 | 0.02  | Down | Expressed protein                                         |
| Pc_TC115871 | 0     | ##### |      | 0     | 5.59E-007 |      | -3.55 | 0.01 | Down | 0     | ##### |      | aldehyde dehydrogenase 2B4                                |
| Pc_TC115908 | -1.43 | 0     | Down | -1.43 | 0         | Down | -1.48 | 0.1  |      | -1.69 | 0     | Down | cysteine-rich RLK (RECEPTOR-like protein kinase) 8        |
| Pc_TC115912 | -4.31 | 0.01  | Down | -1.53 | 0.25      |      | -2.3  | 0.15 |      | -3.18 | 0.03  | Down | eukaryotic initiation factor 4A-III                       |
| Pc_TC115916 | 2.02  | 0     | Up   | 0     | 2.23E-006 |      | 1.35  | 0.21 |      | 0.28  | 0.73  |      | Expressed protein                                         |
| Pc_TC115917 | -0.68 | 0.54  |      | -0.4  | 0.76      |      | -3.96 | 0.03 | Down | -2.25 | 0.08  |      | Expressed protein                                         |
| Pc_TC115942 | 2.28  | 0.01  | Up   | 0     | 0.07      |      | 0.27  | 0.92 |      | -0.89 | 0.6   |      | Expressed protein                                         |
| Pc_TC115955 | -2.66 | ##### | Down | -1.73 | 0.02      | Down | 1.25  | 0.2  |      | -1.43 | 0.05  | Down | Leucine-rich repeat (LRR) family protein                  |
| Pc_TC115961 | 0.17  | 0.77  |      | 0.93  | 0.14      |      | -2.28 | 0.04 | Down | -1.16 | 0.11  |      | Expressed protein                                         |
| Pc_TC115964 | -1.31 | 0.26  |      | 0.62  | 0.56      |      | 2.82  | 0.02 | Up   | 1.59  | 0.08  |      | Expressed protein                                         |
| Pc_TC115974 | 0.19  | 0.8   |      | 0.52  | 0.51      |      | -2.57 | 0.05 | Down | 0.64  | 0.42  |      | Expressed protein                                         |
| Pc_TC115975 | 1.08  | 0.28  |      | 2.06  | 0.04      | Up   | 0.09  | 1    |      | -0.18 | 0.94  |      | Expressed protein                                         |
| Pc_TC115993 | -2.12 | 0.08  |      | -1.3  | 0.3       |      | -1.7  | 0.26 |      | -2.58 | 0.05  | Down | Expressed protein                                         |
| Pc_TC116030 | -2.04 | 0.08  |      | -4.64 | 0.01      | Down | -2.03 | 0.18 |      | -2.75 | 0.03  | Down | Expressed protein                                         |
| Pc_TC116039 | 1.66  | 0.04  | Up   | 0.14  | 0.96      |      | 0.38  | 0.81 |      | 0.78  | 0.46  |      | Expressed protein                                         |
| Pc_TC116079 | -0.86 | 0.43  |      | -0.01 | 1         |      | 0     | 0    |      | -3.31 | 0.02  | Down | Putative uncharacterized protein                          |
| Pc_TC116082 | 0.13  | 0.88  |      | -0.66 | 0.46      |      | -1.22 | 0.32 |      | -2.09 | 0.03  | Down | Expressed protein                                         |
| Pc_TC116085 | 0.48  | 0.44  |      | 1.29  | 0.06      |      | -2.39 | 0.05 | Down | -0.07 | 0.94  |      | Uncharacterized protein                                   |
| Pc_TC116096 | -2.03 | 0.02  | Down | -0.75 | 0.41      |      | 0.4   | 0.74 |      | 0.14  | 0.88  |      | Expressed protein                                         |
| Pc_TC116109 | -0.72 | 0.44  |      | 0.71  | 0.43      |      | 0     | 0    |      | -3.42 | 0.01  | Down | Expressed protein                                         |
| Pc_TC116124 | 0.02  | 0.96  |      | 0.59  | 0.25      |      | -3.11 | 0    | Down | -2.26 | 0     | Down | Expressed protein                                         |
| Pc_TC116151 | -0.43 | 0.58  |      | 0.31  | 0.71      |      | -2.63 | 0.05 | Down | -1    | 0.26  |      | Expressed protein                                         |
| Pc_TC116169 | 0.62  | 0.26  |      | 1.36  | 0.03      | Up   | -1.48 | 0.18 |      | -1.16 | 0.12  |      | Expressed protein                                         |
| Pc_TC116174 | -0.43 | 0.53  |      | -0.76 | 0.34      |      | -1.67 | 0.15 |      | -2.3  | 0.01  | Down | Expressed protein                                         |
| Pc_TC116212 | -0.92 | 0.65  |      | -0.94 | 0.67      |      | 2.71  | 0.05 | Up   | 0.63  | 0.69  |      | Expressed protein                                         |
| Pc_TC116215 | 2.54  | 0.05  | Up   | 1.23  | 0.53      |      | 0     | 0.26 |      | -1.37 | 0.66  |      | Uncharacterized protein                                   |
| Pc_TC116230 | -1.51 | 0.18  |      | 1.72  | 0.05      | Up   | 0     | 0    |      | 0     | 0     |      | Expressed protein                                         |
| Pc_TC116246 | -0.82 | 0.35  |      | -0.26 | 0.81      |      | 2.56  | 0.02 | Up   | 1.11  | 0.17  |      | Expressed protein                                         |
| Pc_TC116250 | 0     | 0     |      | -4.19 | 0.03      | Down | 0.38  | 0.8  |      | -0.23 | 0.88  |      | Expressed protein                                         |
| Pc_TC116252 | 2.28  | 0.01  | Up   | 0     | 0.07      |      | 1.35  | 0.36 |      | 0.55  | 0.71  |      | RAB GTPase homolog G3C                                    |
| Pc_TC116260 | 0.16  | 0.8   |      | 0.26  | 0.72      |      | -2.12 | 0.07 |      | -2.79 | 0     | Down | Uncharacterized protein                                   |
| Pc_TC116262 | -0.3  | 0.59  |      | -0.61 | 0.36      |      | -1.33 | 0.21 |      | -1.56 | 0.03  | Down | Expressed protein                                         |
| Pc_TC116269 | 0.96  | 0.03  |      | 0.79  | 0.15      |      | -3.06 | 0    | Down | -0.38 | 0.55  |      | Expressed protein                                         |
| Pc_TC116277 | 0.07  | 0.93  |      | -0.16 | 0.84      |      | -2.34 | 0.05 | Down | -2.01 | 0.01  | Down | Uncharacterized protein                                   |
| Pc_TC116280 | 0.84  | 0.04  |      | -1.48 | 0.01      | Down | 1.54  | 0.09 |      | 2.52  | ##### | Up   | Expressed protein                                         |
| Pc_TC116299 | -0.4  | 0.68  |      | 1.43  | 0.09      |      | 0     | 0    |      | -2.79 | 0.02  | Down | Expressed protein                                         |
| Pc_TC116327 | 0.46  | 0.58  |      | 0.82  | 0.36      |      | -3.54 | 0.03 | Down | -2.1  | 0.06  |      | Expressed protein                                         |
| Pc_TC116338 | -1.99 | 0.04  | Down | -2.33 | 0.04      | Down | 0.71  | 0.55 |      | -0.86 | 0.37  |      | Expressed protein                                         |
| Pc_TC116339 | 0.25  | 0.77  |      | 1.04  | 0.21      |      | -4.23 | 0.01 | Down | -1.11 | 0.25  |      | Expressed protein                                         |
| Pc_TC116352 | 0.76  | 0.55  |      | 2.23  | 0.04      | Up   | -3.82 | 0.12 |      | -0.7  | 0.69  |      | eukaryotic elongation factor 5A-3                         |
| Pc_TC116373 | 1.49  | 0     | Up   | 0     | 1.33E-011 |      | 1.2   | 0.22 |      | -0.26 | 0.71  |      | Ribosomal protein S4 (RPS4A) family protein               |
| Pc_TC116393 | -1.14 | 0.42  |      | -1.43 | 0.37      |      | 0.45  | 0.79 |      | 2.5   | 0.01  | Up   | Expressed protein                                         |
| Pc_TC116395 | 0.81  | 0.24  |      | 0.27  | 0.76      |      | 1.05  | 0.35 |      | -3.21 | 0     | Down | Expressed protein                                         |
| Pc_TC116399 | 2.91  | 0     | Up   | 0     | 0.09      |      | 1.95  | 0.17 |      | 0.46  | 0.79  |      | Uncharacterized protein                                   |
| Pc_TC116400 | -0.18 | 0.83  |      | 0.23  | 0.79      |      | -1.2  | 0.32 |      | -2.01 | 0.03  | Down | Expressed protein                                         |
| Pc_TC116403 | 0     | 0     |      | 0     | 0         |      | 1.4   | 0.26 |      | -3.83 | 0.01  | Down | Expressed protein                                         |

|             |       |       |      |       |           |      |       |      |      |       |       |      |                                                    |
|-------------|-------|-------|------|-------|-----------|------|-------|------|------|-------|-------|------|----------------------------------------------------|
| Pc_TC116406 | 1.45  | 0.04  | Up   | 0     | 0         |      | 1.5   | 0.2  |      | 0.37  | 0.7   |      | Expressed protein                                  |
| Pc_TC116409 | 0.16  | 0.74  |      | 1.81  | 0         | Up   | -3.68 | 0    | Down | -2.18 | 0     | Down | Expressed protein                                  |
| Pc_TC116411 | -0.86 | 0.41  |      | 0.06  | 1         |      | -4.14 | 0.02 | Down | -4.02 | 0.01  | Down | Expressed protein                                  |
| Pc_TC116415 | -3.57 | 0.01  | Down | -0.19 | 0.9       |      | 1.13  | 0.37 |      | -0.43 | 0.71  |      | Uncharacterized protein                            |
| Pc_TC116442 | 0.33  | 0.65  |      | 0.36  | 0.66      |      | 2     | 0.06 |      | 1.51  | 0.04  | Up   | Expressed protein                                  |
| Pc_TC116489 | -0.12 | 0.91  |      | -0.45 | 0.64      |      | 0     | 0    |      | -3.34 | 0     | Down | Expressed protein                                  |
| Pc_TC116501 | 2.1   | 0.01  | Up   | 0     | 0.02      |      | 2.83  | 0.02 | Up   | -0.11 | 0.98  |      | Expressed protein                                  |
| Pc_TC116508 | 0     | 1     |      | 2.38  | 0.46      |      | 3.5   | 0.15 |      | 4.27  | 0.02  | Up   | Expressed protein                                  |
| Pc_TC116510 | 1.56  | 0.01  | Up   | 1.29  | 0.07      |      | -4.22 | 0    | Down | 0.35  | 0.65  |      | Expressed protein                                  |
| Pc_TC116511 | -1.11 | 0.3   |      | -3    | 0.04      | Down | 1.75  | 0.14 |      | 0.68  | 0.48  |      | Expressed protein                                  |
| Pc_TC116514 | 0.08  | 0.99  |      | 0.26  | 0.85      |      | -3.82 | 0.04 | Down | -3.11 | 0.03  | Down | Expressed protein                                  |
| Pc_TC116526 | -0.23 | 0.85  |      | -0.74 | 0.53      |      | -4.2  | 0.02 | Down | -4.08 | 0.01  | Down | Expressed protein                                  |
| Pc_TC116541 | 0.28  | 0.78  |      | 0.78  | 0.42      |      | -4.2  | 0.02 | Down | -1.75 | 0.13  |      | Expressed protein                                  |
| Pc_TC116544 | -0.16 | 0.91  |      | -1.32 | 0.27      |      | -1.2  | 0.4  |      | -2.49 | 0.04  | Down | Expressed protein                                  |
| Pc_TC116563 | -5.38 | ##### | Down | -4.82 | 2.28E-005 | Down | -3.79 | 0    | Down | -3.51 | 0     | Down | Expressed protein                                  |
| Pc_TC116580 | 3.23  | ##### | Up   | 0     | 0.01      |      | 2.99  | 0.01 | Up   | 1.64  | 0.07  |      | Expressed protein                                  |
| Pc_TC116588 | -1.37 | 0.05  | Down | -1.16 | 0.14      |      | 0.23  | 0.83 |      | -0.2  | 0.8   |      | Expressed protein                                  |
| Pc_TC116598 | -0.13 | 0.72  |      | 0.42  | 0.34      |      | -1.89 | 0.04 | Down | -1.38 | 0.01  | Down | GL27238                                            |
| Pc_TC116599 | -1.49 | 0.02  | Down | 0     | 3.61E-009 |      | -0.64 | 0.55 |      | -1.94 | 0.01  | Down | Expressed protein                                  |
| Pc_TC116604 | 0.36  | 0.6   |      | -0.41 | 0.63      |      | 1.56  | 0.15 |      | 1.47  | 0.04  | Up   | Expressed protein                                  |
| Pc_TC116609 | -1.71 | 0.03  | Down | 1.04  | 0.16      |      | -2.7  | 0.04 | Down | -2.48 | 0.01  | Down | Expressed protein                                  |
| Pc_TC116615 | 2.74  | 0.05  | Up   | 1.93  | 0.29      |      | -1.08 | 0.83 |      | 0.63  | 0.88  |      | Expressed protein                                  |
| Pc_TC116618 | 0.73  | 0.43  |      | 1.91  | 0.03      | Up   | -2.3  | 0.15 |      | -0.77 | 0.52  |      | Expressed protein                                  |
| Pc_TC116663 | 0.2   | 0.8   |      | 0.8   | 0.31      |      | -3.03 | 0.03 | Down | -1.28 | 0.15  |      | Expressed protein                                  |
| Pc_TC116668 | 0.08  | 1     |      | -2.4  | 0.23      |      | 3.04  | 0.02 | Up   | 1.84  | 0.08  |      | Expressed protein                                  |
| Pc_TC116692 | -1.64 | 0.1   |      | -1.53 | 0.17      |      | -3.22 | 0.04 | Down | -1.83 | 0.09  |      | cytochrome c-2                                     |
| Pc_TC116703 | 0.28  | 0.64  |      | 0.22  | 0.76      |      | -3.01 | 0.01 | Down | -1.83 | 0.02  | Down | Expressed protein                                  |
| Pc_TC116717 | 0.84  | 0.03  |      | 0     | 5.82E-021 |      | 1.82  | 0.04 | Up   | 0.94  | 0.09  |      | Expressed protein                                  |
| Pc_TC116726 | 1.66  | 0.1   |      | 2.32  | 0.03      | Up   | -1.01 | 0.61 |      | 1.3   | 0.26  |      | Expressed protein                                  |
| Pc_TC116736 | 0.18  | 0.88  |      | 1.18  | 0.19      |      | -3.3  | 0.04 | Down | -4.18 | 0     | Down | Expressed protein                                  |
| Pc_TC116744 | 3.08  | 0.05  | Up   | 0     | 0.67      |      | 2.9   | 0.15 |      | 1.21  | 0.69  |      | Expressed protein                                  |
| Pc_TC116745 | 1     | 0.25  |      | 1.59  | 0.09      |      | -3.82 | 0.04 | Down | -1    | 0.41  |      | Expressed protein                                  |
| Pc_TC116753 | 0.79  | 0.37  |      | 2.34  | 0.01      | Up   | 0.6   | 0.66 |      | 0.17  | 0.91  |      | Expressed protein                                  |
| Pc_TC116758 | -1.19 | 0.07  |      | -1.85 | 0.02      | Down | 1.89  | 0.06 |      | 0.78  | 0.26  |      | Expressed protein                                  |
| Pc_TC116772 | 0     | 1     |      | 0     | 1         |      | 4.55  | 0.03 | Up   | 2.63  | 0.32  |      | Cytochrome P450-like TBP protein (Fragment)        |
| Pc_TC116773 | -5.17 | ##### | Down | 0.4   | 0.61      |      | -1.79 | 0.14 |      | -4.3  | ##### | Down | Expressed protein                                  |
| Pc_TC116776 | 0.44  | 0.31  |      | 1.17  | 0.02      | Up   | -1.69 | 0.09 |      | -0.64 | 0.29  |      | Expressed protein                                  |
| Pc_TC116783 | -2.09 | 0.12  |      | -4.11 | 0.03      | Down | -0.86 | 0.59 |      | -1.22 | 0.34  |      | Expressed protein                                  |
| Pc_TC116786 | -1.73 | 0.44  |      | -1.75 | 0.48      |      | 3.02  | 0.03 | Up   | -1.6  | 0.44  |      | Expressed protein                                  |
| Pc_TC116792 | 2     | 0.05  | Up   | 0     | 0.09      |      | 0.73  | 0.68 |      | -0.22 | 0.96  |      | NAD(P)-binding Rossmann-fold superfamily protein   |
| Pc_TC116794 | -0.31 | 0.55  |      | -0.16 | 0.8       |      | -1.89 | 0.07 |      | -1.43 | 0.04  | Down | Expressed protein                                  |
| Pc_TC116805 | -0.53 | 0.59  |      | -0.41 | 0.72      |      | 0     | 0    |      | -3.23 | 0.01  | Down | Expressed protein                                  |
| Pc_TC116812 | -0.41 | 0.66  |      | -0.43 | 0.69      |      | 2.25  | 0.05 | Up   | 1.78  | 0.03  | Up   | Expressed protein                                  |
| Pc_TC116819 | 0.16  | 0.74  |      | -0.06 | 0.93      |      | -2.09 | 0.05 | Down | -0.12 | 0.85  |      | Expressed protein                                  |
| Pc_TC116831 | 3.78  | 0.05  | Up   | 4.38  | 0.02      | Up   | 1.09  | 0.94 |      | 4.15  | 0.02  | Up   | Expressed protein                                  |
| Pc_TC116833 | 1.66  | 0.05  |      | 0.31  | 0.84      |      | 1.55  | 0.24 |      | 2.13  | 0.02  | Up   | Expressed protein                                  |
| Pc_TC116846 | -0.13 | 0.9   |      | 0.65  | 0.44      |      | -2.82 | 0.04 | Down | -2.28 | 0.03  | Down | Expressed protein                                  |
| Pc_TC116884 | 2.77  | 0     | Up   | 0     | 0.09      |      | 2.66  | 0.05 | Up   | 0.98  | 0.45  |      | Expressed protein                                  |
| Pc_TC116910 | -1.84 | 0.04  | Down | -0.23 | 0.81      |      | 0.17  | 0.9  |      | -0.5  | 0.58  |      | Expressed protein                                  |
| Pc_TC116915 | -0.62 | 0.48  |      | -2.64 | 0.02      | Down | 1.88  | 0.1  |      | 0.61  | 0.49  |      | peptide transporter 5                              |
| Pc_TC116923 | -2.34 | 0     | Down | -1.04 | 0.22      |      | -6.73 | 0    | Down | -1.7  | 0.05  |      | Low temperature and salt responsive protein family |
| Pc_TC116924 | -1.09 | 0.38  |      | -2.11 | 0.16      |      | -1.34 | 0.4  |      | -2.96 | 0.05  | Down | Expressed protein                                  |
| Pc_TC116937 | 2.94  | 0.01  | Up   | 3.01  | 0.02      | Up   | 2.83  | 0.08 |      | 3.53  | 0     | Up   | Expressed protein                                  |
| Pc_TC116938 | -3.73 | 0.05  | Down | 1.16  | 0.29      |      | 1.5   | 0.26 |      | 0.99  | 0.37  |      | Putative uncharacterized protein Sb03g033200       |
| Pc_TC116939 | -2.21 | 0.03  | Down | -0.02 | 1         |      | 0     | 1    |      | -0.8  | 0.41  |      | Expressed protein                                  |
| Pc_TC116945 | -1.38 | 0.23  |      | -3.4  | 0.03      | Down | -0.79 | 0.6  |      | -0.13 | 0.94  |      | Expressed protein                                  |
| Pc_TC116957 | -0.55 | 0.46  |      | 0.19  | 0.83      |      | -2.36 | 0.07 |      | -1.81 | 0.05  | Down | Expressed protein                                  |
| Pc_TC116977 | -3.92 | 0.03  | Down | -1.62 | 0.28      |      | -0.5  | 0.77 |      | -1.57 | 0.25  |      | Expressed protein                                  |
| Pc_TC116985 | 0.26  | 0.82  |      | 1.74  | 0.05      | Up   | -1.32 | 0.37 |      | -0.9  | 0.43  |      | Expressed protein                                  |
| Pc_TC116999 | -2.42 | 0.02  | Down | -0.57 | 0.59      |      | -2    | 0.16 |      | -2.14 | 0.05  |      | Expressed protein                                  |
| Pc_TC117004 | 0     | 0     |      | 0     | 0.01      |      | 0     | 0.01 |      | -4.7  | 0.01  | Down | Ribosomal L27e protein family                      |
| Pc_TC117014 | -1.51 | 0.09  |      | -2.26 | 0.04      | Down | 0.12  | 0.94 |      | -1.54 | 0.11  |      | Expressed protein                                  |

|             |       |       |      |       |           |      |       |      |      |       |       |      |                                              |
|-------------|-------|-------|------|-------|-----------|------|-------|------|------|-------|-------|------|----------------------------------------------|
| Pc_TC117017 | 1.59  | 0.18  |      | 0.71  | 0.69      |      | 1.4   | 0.39 |      | 2.46  | 0.03  | Up   | Expressed protein                            |
| Pc_TC117020 | -0.28 | 0.83  |      | -0.77 | 0.53      |      | -4.02 | 0.03 | Down | -2.09 | 0.09  |      | Expressed protein                            |
| Pc_TC117021 | -0.01 | 1     |      | 0.48  | 0.47      |      | -1.57 | 0.15 |      | -1.51 | 0.04  | Down | Expressed protein                            |
| Pc_TC117023 | 0.44  | 0.35  |      | 1.42  | 0.01      | Up   | -3.7  | 0    | Down | -0.6  | 0.35  |      | Expressed protein                            |
| Pc_TC117025 | -0.96 | 0.28  |      | -2.23 | 0.05      | Down | -0.23 | 0.87 |      | 0.51  | 0.57  |      | Expressed protein                            |
| Pc_TC117029 | 2.12  | 0.04  | Up   | 0     | 0.11      |      | 1.9   | 0.2  |      | 1.53  | 0.21  |      | Expressed protein                            |
| Pc_TC117051 | 1.78  | 0.03  | Up   | 0     | 0.01      |      | 2.56  | 0.03 | Up   | 0.13  | 0.95  |      | Expressed protein                            |
| Pc_TC117060 | 0.01  | 1     |      | 0.78  | 0.43      |      | -0.5  | 0.74 |      | -3.31 | 0.02  | Down | Expressed protein                            |
| Pc_TC117075 | 0.19  | 0.82  |      | 0.11  | 0.92      |      | 0     | 0    |      | -1.91 | 0.05  | Down | Expressed protein                            |
| Pc_TC117096 | -0.73 | 0.53  |      | -3.33 | 0.04      | Down | -0.08 | 0.99 |      | 0.28  | 0.82  |      | Expressed protein                            |
| Pc_TC117118 | 2.32  | ##### | Up   | 0     | 1.56E-006 |      | 1.64  | 0.12 |      | 0.66  | 0.38  |      | gamma subunit of Mt ATP synthase             |
| Pc_TC117123 | -1.68 | 0.12  |      | -0.45 | 0.7       |      | 0     | 0    |      | -3.54 | 0.01  | Down | putative Ty1-copia subclass                  |
| Pc_TC117126 | 3.25  | 0     | Up   | 0     | 0.2       |      | 4.12  | 0    | Up   | 1.95  | 0.12  |      | Calcium-binding EF-hand family protein       |
| Pc_TC117167 | 0.86  | 0.57  |      | 2.42  | 0.04      | Up   | 1.16  | 0.5  |      | 1.34  | 0.31  |      | Uncharacterized protein                      |
| Pc_TC117174 | 1.05  | 0.19  |      | -0.06 | 1         |      | 3.2   | 0.01 | Up   | 2.38  | 0     | Up   | Expressed protein                            |
| Pc_TC117197 | 0.01  | 1     |      | 1.88  | 0.04      | Up   | -0.89 | 0.56 |      | -1.31 | 0.28  |      | Expressed protein                            |
| Pc_TC117202 | 1.64  | 0.02  | Up   | 0     | 0         |      | 1.3   | 0.26 |      | -0.37 | 0.71  |      | Expressed protein                            |
| Pc_TC117209 | 1.97  | 0     | Up   | 0     | 5.01E-007 |      | 1.36  | 0.2  |      | -0.04 | 0.97  |      | Ribosomal protein S24e family protein        |
| Pc_TC117219 | -0.44 | 0.84  |      | -2.26 | 0.27      |      | 3.23  | 0.01 | Up   | 2.11  | 0.04  | Up   | Expressed protein                            |
| Pc_TC117235 | -0.04 | 0.97  |      | 0.12  | 0.88      |      | -1.89 | 0.1  |      | -2.13 | 0.01  | Down | Expressed protein                            |
| Pc_TC117237 | -1.35 | 0.16  |      | -3.07 | 0.02      | Down | 0.42  | 0.75 |      | -0.04 | 0.99  |      | Expressed protein                            |
| Pc_TC117250 | 1.3   | 0.01  | Up   | 1.33  | 0.03      | Up   | -0.94 | 0.38 |      | 1.55  | 0.02  | Up   | Uncharacterized protein                      |
| Pc_TC117251 | 0.71  | 0.57  |      | 1.12  | 0.36      |      | 2.44  | 0.07 |      | 2.36  | 0.02  | Up   | Expressed protein                            |
| Pc_TC117255 | 0.49  | 0.83  |      | -0.53 | 0.89      |      | 2.13  | 0.17 |      | 2.43  | 0.04  | Up   | Expressed protein                            |
| Pc_TC117265 | 0.12  | 0.92  |      | -0.46 | 0.67      |      | 2.52  | 0.03 | Up   | 1.35  | 0.11  |      | Putative reverse transcriptase               |
| Pc_TC117292 | -0.6  | 0.79  |      | -0.94 | 0.67      |      | 2.77  | 0.04 | Up   | -0.2  | 0.98  |      | Expressed protein                            |
| Pc_TC117293 | 0.08  | 1     |      | 0.06  | 1         |      | 5.9   | 0    | Up   | 5.15  | 0     | Up   | Expressed protein                            |
| Pc_TC117312 | 0.85  | 0.19  |      | 1.65  | 0.02      | Up   | -0.2  | 0.87 |      | -0.33 | 0.7   |      | Expressed protein                            |
| Pc_TC117315 | 0.5   | 0.38  |      | 0.52  | 0.45      |      | -4.91 | 0    | Down | -3.37 | 0     | Down | Expressed protein                            |
| Pc_TC117319 | 1.22  | 0.15  |      | 0.64  | 0.55      |      | 3.11  | 0.01 | Up   | 2.8   | 0     | Up   | cycloartenol synthase 1                      |
| Pc_TC117320 | -0.5  | 0.36  |      | -1.38 | 0.04      | Down | -0.35 | 0.73 |      | -0.19 | 0.78  |      | cycloartenol synthase 1                      |
| Pc_TC117327 | -4.01 | 0     | Down | -0.64 | 0.55      |      | -0.5  | 0.71 |      | -1    | 0.32  |      | Expressed protein                            |
| Pc_TC117343 | 0.33  | 0.76  |      | 0.25  | 0.85      |      | 0     | 0.01 |      | -3.77 | 0.01  | Down | Expressed protein                            |
| Pc_TC117345 | 0     | 0     |      | 0     | 0.01      |      | -3.82 | 0.04 | Down | 0     | 0     |      | Expressed protein                            |
| Pc_TC117353 | 0.91  | 0.22  |      | -0.07 | 0.98      |      | -5.67 | 0    | Down | -2.09 | 0.05  |      | Expressed protein                            |
| Pc_TC117354 | -2.62 | 0.03  | Down | -0.83 | 0.47      |      | -5.2  | 0.01 | Down | -2.75 | 0.03  | Down | Expressed protein                            |
| Pc_TC117399 | 2.56  | 0     | Up   | 0     | 0.07      |      | 1.31  | 0.38 |      | -0.11 | 1     |      | Expressed protein                            |
| Pc_TC117417 | -1.02 | 0.15  |      | -4.82 | 2.28E-005 | Down | -1.28 | 0.27 |      | -4.51 | ##### | Down | Os06g0203000 protein                         |
| Pc_TC117422 | 0.71  | 0.07  |      | 0.66  | 0.18      |      | -2.12 | 0.03 | Down | 0.44  | 0.43  |      | Expressed protein                            |
| Pc_TC117426 | 0     | 0     |      | -3.44 | 0.01      | Down | -4.58 | 0.01 | Down | -5.46 | 0     | Down | Expressed protein                            |
| Pc_TC117460 | 4.4   | 0.01  | Up   | 2.06  | 0.59      |      | 3.09  | 0.24 |      | 3.33  | 0.12  |      | Expressed protein                            |
| Pc_TC117476 | 0.39  | 0.61  |      | 1.56  | 0.04      | Up   | -2.21 | 0.1  |      | -3.9  | 0     | Down | Expressed protein                            |
| Pc_TC117485 | -1.02 | 0.45  |      | 0.24  | 0.89      |      | -4.4  | 0.05 | Down | -2.28 | 0.13  |      | Expressed protein                            |
| Pc_TC117494 | 2.66  | 0     | Up   | 2.02  | 0.07      |      | 2.71  | 0.04 | Up   | 2.07  | 0.06  |      | Expressed protein                            |
| Pc_TC117516 | -1.31 | 0.26  |      | -2.33 | 0.1       |      | -4.89 | 0.02 | Down | -0.24 | 0.86  |      | Uncharacterized protein                      |
| Pc_TC117529 | 0.84  | 0.49  |      | 2.16  | 0.04      | Up   | 1.57  | 0.27 |      | 1.21  | 0.31  |      | Expressed protein                            |
| Pc_TC117534 | -3.83 | 0.04  | Down | -2.85 | 0.11      |      | 1.5   | 0.26 |      | 0.42  | 0.75  |      | Expressed protein                            |
| Pc_TC117548 | 0.05  | 0.98  |      | 1.13  | 0.15      |      | -4.11 | 0.01 | Down | -3.4  | 0     | Down | Expressed protein                            |
| Pc_TC117549 | 1     | 0.21  |      | 1.96  | 0.02      | Up   | -2.44 | 0.11 |      | -3.54 | 0.01  | Down | Expressed protein                            |
| Pc_TC117551 | -1.14 | 0.22  |      | -2.75 | 0.03      | Down | 1.29  | 0.27 |      | 1.46  | 0.07  |      | Expressed protein                            |
| Pc_TC117553 | 1.45  | 0.03  | Up   | 0     | 3.04E-005 |      | 1.73  | 0.12 |      | -0.29 | 0.75  |      | Expressed protein                            |
| Pc_TC117554 | 2.89  | 0.01  | Up   | 0     | 0.27      |      | 2.57  | 0.1  |      | 2.21  | 0.09  |      | Expressed protein                            |
| Pc_TC117559 | 0     | 0     |      | 0     | 0         |      | -5.63 | 0    | Down | -5.5  | 0     | Down | ubiquitin 5                                  |
| Pc_TC117560 | -0.3  | 0.69  |      | 1.72  | 0.02      | Up   | -2.43 | 0.06 |      | -1.7  | 0.06  |      | Expressed protein                            |
| Pc_TC117583 | 3.08  | 0.05  | Up   | 2.23  | 0.29      |      | 1.96  | 0.42 |      | 3.43  | 0.02  | Up   | Putative uncharacterized protein Sb02g033710 |
| Pc_TC117587 | 0.6   | 0.46  |      | 0.58  | 0.54      |      | -3.5  | 0.03 | Down | -0.92 | 0.37  |      | Expressed protein                            |
| Pc_TC117600 | -2.16 | 0.01  | Down | -0.81 | 0.34      |      | -0.05 | 0.98 |      | -0.59 | 0.47  |      | Expressed protein                            |
| Pc_TC117612 | -3.45 | 0.02  | Down | -4.47 | 0.01      | Down | -2.21 | 0.16 |      | -3.9  | 0.01  | Down | putative unclassified                        |
| Pc_TC117622 | 0.28  | 0.68  |      | 1.66  | 0.02      | Up   | -4.82 | 0    | Down | -0.77 | 0.35  |      | Expressed protein                            |
| Pc_TC117624 | 2.57  | 0     | Up   | 1.77  | 0.1       |      | -0.96 | 0.62 |      | 2.54  | 0.01  | Up   | Expressed protein                            |
| Pc_TC117627 | -2.07 | 0     | Down | -0.91 | 0.2       |      | 0.45  | 0.67 |      | -0.46 | 0.52  |      | Expressed protein                            |
| Pc_TC117628 | -1.45 | 0.01  | Down | -0.53 | 0.42      |      | 0.79  | 0.43 |      | 0.13  | 0.85  |      | Expressed protein                            |

|             |       |      |      |       |           |      |       |           |      |       |       |      |                                                              |
|-------------|-------|------|------|-------|-----------|------|-------|-----------|------|-------|-------|------|--------------------------------------------------------------|
| Pc_TC117641 | -0.7  | 0.52 |      | 0.23  | 0.86      |      | -4.08 | 0.03      | Down | -1.15 | 0.31  |      | Uncharacterized protein                                      |
| Pc_TC117645 | -3.24 | 0.03 | Down | 0     | 0.01      |      | 0.77  | 0.57      |      | -0.61 | 0.62  |      | Expressed protein                                            |
| Pc_TC117665 | 1.6   | 0.04 | Up   | 0     | 0         |      | 0.95  | 0.46      |      | -1.25 | 0.29  |      | FKBP-type peptidyl-prolyl cis-trans isomerase family protein |
| Pc_TC117666 | 0.82  | 0.25 |      | 0     | 9.94E-005 |      | 0.63  | 0.6       |      | -3.8  | 0     | Down | Expressed protein                                            |
| Pc_TC117669 | -0.64 | 0.56 |      | -2.88 | 0.05      | Down | 0.07  | 0.99      |      | 0.39  | 0.72  |      | Expressed protein                                            |
| Pc_TC117680 | 0.47  | 0.13 |      | -0.09 | 0.8       |      | -1.8  | 0.04      | Down | -1.31 | 0.01  | Down | Expressed protein                                            |
| Pc_TC117688 | 0.37  | 0.75 |      | 0.8   | 0.46      |      | -1.67 | 0.3       |      | -2.96 | 0.05  | Down | Expressed protein                                            |
| Pc_TC117720 | -1.31 | 0.14 |      | -0.94 | 0.34      |      | 2.59  | 0.02      | Up   | 1.86  | 0.02  | Up   | Expressed protein                                            |
| Pc_TC117733 | 1.43  | 0.04 | Up   | 0.88  | 0.29      |      | 0.73  | 0.54      |      | 1.32  | 0.1   |      | Expressed protein                                            |
| Pc_TC117735 | 1.47  | 0.01 | Up   | 0     | 2.36E-007 |      | 1.18  | 0.27      |      | 0.08  | 0.93  |      | ubiquitin-conjugating enzyme 30                              |
| Pc_TC117748 | -0.51 | 0.89 |      | 1.28  | 0.4       |      | 0.24  | 0.98      |      | 2.43  | 0.04  | Up   | Expressed protein                                            |
| Pc_TC117774 | 3.14  | 0    | Up   | 0     | 0.11      |      | 3.06  | 0.02      | Up   | 1.83  | 0.11  |      | Expressed protein                                            |
| Pc_TC117776 | 0.19  | 0.94 |      | -0.07 | 1         |      | 2.83  | 0.03      | Up   | 1.33  | 0.22  |      | Expressed protein                                            |
| Pc_TC117791 | -1.08 | 0.12 |      | -1.75 | 0.04      | Down | -0.18 | 0.88      |      | -0.9  | 0.25  |      | MUTS-homologue 5                                             |
| Pc_TC117835 | -1.18 | 0.23 |      | -3.31 | 0.02      | Down | 0.53  | 0.68      |      | -0.94 | 0.37  |      | Expressed protein                                            |
| Pc_TC117837 | 0.57  | 0.26 |      | 0.49  | 0.43      |      | -3.41 | 0         | Down | -1.46 | 0.04  | Down | Expressed protein                                            |
| Pc_TC117840 | -1.1  | 0.18 |      | -2.47 | 0.02      | Down | -2.61 | 0.05      |      | -1.55 | 0.1   |      | Expressed protein                                            |
| Pc_TC117853 | -0.22 | 0.76 |      | -1.9  | 0.04      | Down | 1.87  | 0.08      |      | 1.48  | 0.04  | Up   | Expressed protein                                            |
| Pc_TC117878 | 3.08  | 0.05 | Up   | 1.64  | 0.53      |      | 1.31  | 0.68      |      | 0     | 0.54  |      | Uncharacterized protein                                      |
| Pc_TC117882 | 0.27  | 0.95 |      | 0.84  | 0.61      |      | 3.4   | 0.01      | Up   | 2.14  | 0.07  |      | Expressed protein                                            |
| Pc_TC117890 | -0.95 | 0.1  |      | -0.56 | 0.41      |      | -1.5  | 0.16      |      | -1.64 | 0.03  | Down | Expressed protein                                            |
| Pc_TC117891 | 1.79  | 0.04 | Up   | 0     | 0.02      |      | 0.45  | 0.78      |      | -0.58 | 0.68  |      | Os06g0220100 protein                                         |
| Pc_TC117892 | 0.33  | 0.65 |      | -0.5  | 0.57      |      | 0.44  | 0.7       |      | 1.87  | 0.01  | Up   | Expressed protein                                            |
| Pc_TC117907 | 1.64  | 0    | Up   | 0     | 1.20E-008 |      | 1.15  | 0.26      |      | -0.05 | 0.96  |      | Ribosomal protein S8e family protein                         |
| Pc_TC117929 | -0.78 | 0.37 |      | 0.62  | 0.48      |      | -3.23 | 0.03      | Down | -2    | 0.05  |      | uncharacterized protein                                      |
| Pc_TC117937 | 2     | 0    | Up   | 1.98  | 0         | Up   | 0.4   | 0.72      |      | 1.88  | 0.01  | Up   | Expressed protein                                            |
| Pc_TC117938 | 0.57  | 0.09 |      | 0.31  | 0.48      |      | -2.43 | 0.01      | Down | -0.89 | 0.09  |      | Expressed protein                                            |
| Pc_TC117951 | -0.92 | 0.43 |      | -1.94 | 0.17      |      | 3.48  | 0         | Up   | 1.51  | 0.1   |      | Pectin lyase-like superfamily protein                        |
| Pc_TC117957 | 4.99  | 0    | Up   | 4.15  | 0.03      | Up   | 2.31  | 0.48      |      | 3.43  | 0.1   |      | Expressed protein                                            |
| Pc_TC117962 | 0.53  | 0.44 |      | 0.87  | 0.26      |      | -2.7  | 0.04      | Down | -0.58 | 0.5   |      | Expressed protein                                            |
| Pc_TC117973 | -2.63 | 0    | Down | -4.18 | 3.35E-006 | Down | -2.7  | 0.02      | Down | -4.46 | ##### | Down | GTP binding Elongation factor Tu family protein              |
| Pc_TC117981 | 1.69  | 0.05 | Up   | 0     | 0.02      |      | 0.86  | 0.54      |      | -1.05 | 0.43  |      | Calcium-binding EF-hand family protein                       |
| Pc_TC117982 | 4.4   | 0.01 | Up   | 3.76  | 0.07      |      | 3.2   | 0.21      |      | 0.63  | 1     |      | Expressed protein                                            |
| Pc_TC117984 | -1.99 | 0.04 | Down | -1.53 | 0.14      |      | -1.37 | 0.29      |      | -1.07 | 0.27  |      | Expressed protein                                            |
| Pc_TC117997 | 2.3   | 0.04 | Up   | 0     | 0.2       |      | 0.92  | 0.64      |      | 0.36  | 0.91  |      | Lojap-related protein                                        |
| Pc_TC117999 | -0.28 | 0.83 |      | -0.66 | 0.59      |      | -1.11 | 0.45      |      | -2.58 | 0.05  | Down | Expressed protein                                            |
| Pc_TC118011 | -1.27 | 0.1  |      | -1.82 | 0.05      |      | -1.9  | 0.13      |      | -1.83 | 0.04  | Down | O-methyltransferase family protein                           |
| Pc_TC118017 | 2.48  | 0.02 | Up   | 0     | 0.15      |      | 0.5   | 0.83      |      | 0.72  | 0.65  |      | Expressed protein                                            |
| Pc_TC118020 | 0.49  | 0.58 |      | 1.03  | 0.26      |      | -4.25 | 0.02      | Down | -1.54 | 0.17  |      | Expressed protein                                            |
| Pc_TC118037 | 0.22  | 0.83 |      | 0.59  | 0.54      |      | -2.18 | 0.14      |      | -2.91 | 0.02  | Down | Expressed protein                                            |
| Pc_TC118045 | -0.24 | 0.71 |      | 0.45  | 0.53      |      | -2.46 | 0.04      | Down | -1.8  | 0.03  | Down | Expressed protein                                            |
| Pc_TC118048 | -2.22 | 0.01 | Down | -1.24 | 0.19      |      | -0.76 | 0.53      |      | -1.81 | 0.06  |      | Expressed protein                                            |
| Pc_TC118055 | 1.68  | 0.01 | Up   | 0     | 2.64E-005 |      | 1.8   | 0.1       |      | 0.3   | 0.73  |      | Uncharacterized protein                                      |
| Pc_TC118065 | -1.37 | 0.13 |      | -1.3  | 0.2       |      | -2.68 | 0.06      |      | -2.27 | 0.03  | Down | Protein Transporter,Pam16                                    |
| Pc_TC118074 | -2.06 | 0    | Down | -1.84 | 0.02      | Down | 2.61  | 0.01      | Up   | 0.81  | 0.25  |      | Expressed protein                                            |
| Pc_TC118088 | 0.8   | 0.34 |      | 0.4   | 0.71      |      | 2.69  | 0.02      | Up   | 1.54  | 0.08  |      | Uncharacterized protein                                      |
| Pc_TC118109 | 2.15  | 0    | Up   | 0     | 0         |      | 3.62  | 0         | Up   | 0.09  | 0.96  |      | Expressed protein                                            |
| Pc_TC118111 | 1.48  | 0.05 | Up   | 0.92  | 0.32      |      | 0.42  | 0.75      |      | 0.52  | 0.59  |      | Expressed protein                                            |
| Pc_TC118116 | 1.94  | 0.07 |      | 2.58  | 0.02      | Up   | 1.09  | 0.51      |      | -0.2  | 0.98  |      | Expressed protein                                            |
| Pc_TC118123 | 0.38  | 0.62 |      | 1.12  | 0.16      |      | -4.08 | 0.01      | Down | -1.96 | 0.05  | Down | Uncharacterized protein                                      |
| Pc_TC118127 | -0.51 | 0.57 |      | -0.02 | 1         |      | -3.46 | 0.02      | Down | -1.34 | 0.18  |      | Expressed protein                                            |
| Pc_TC118135 | 0.27  | 0.82 |      | -0.87 | 0.49      |      | -1.89 | 0.23      |      | -3.18 | 0.03  | Down | Expressed protein                                            |
| Pc_TC118153 | 1.97  | 0.04 | Up   | 1.91  | 0.08      |      | 0     | 0.05      |      | 0.95  | 0.45  |      | Uncharacterized protein                                      |
| Pc_TC118158 | 0.3   | 0.42 |      | -0.09 | 0.85      |      | -1.75 | 0.06      |      | -1.33 | 0.02  | Down | metacaspase 1                                                |
| Pc_TC118169 | -0.57 | 0.4  |      | -3.4  | 0         | Down | -0.91 | 0.42      |      | -0.79 | 0.32  |      | unknown protein                                              |
| Pc_TC118180 | 0.14  | 0.7  |      | 1.16  | 0.01      | Up   | -1.75 | 0.06      |      | -0.75 | 0.18  |      | Expressed protein                                            |
| Pc_TC118181 | 0.57  | 0.24 |      | 0.73  | 0.21      |      | -4.98 | 7.05E-005 | Down | -2.75 | 0     | Down | Expressed protein                                            |
| Pc_TC118207 | 1.71  | 0.01 | Up   | 0     | 9.94E-005 |      | 1.26  | 0.27      |      | 0.35  | 0.7   |      | Ribosomal protein S19 family protein                         |
| Pc_TC118208 | 1.9   | 0.01 | Up   | 0     | 0         |      | 1.27  | 0.31      |      | -0.13 | 0.94  |      | Expressed protein                                            |
| Pc_TC118216 | 0.33  | 0.61 |      | 1.09  | 0.12      |      | -5.97 | 0         | Down | -3.53 | 0     | Down | Expressed protein                                            |
| Pc_TC118230 | 0.47  | 0.72 |      | 0.53  | 0.7       |      | 2.34  | 0.07      |      | 2.09  | 0.03  | Up   | Expressed protein                                            |
| Pc_TC118237 | -2.08 | 0.02 | Down | -0.76 | 0.4       |      | -0.74 | 0.54      |      | 0.45  | 0.58  |      | Expressed protein                                            |

|             |       |       |      |       |           |      |       |           |      |       |       |      |                                                               |
|-------------|-------|-------|------|-------|-----------|------|-------|-----------|------|-------|-------|------|---------------------------------------------------------------|
| Pc_TC118239 | -0.41 | 0.65  |      | -2.38 | 0.04      | Down | -0.07 | 0.97      |      | -0.34 | 0.74  |      | Expressed protein                                             |
| Pc_TC118244 | 0.71  | 0.44  |      | 1.43  | 0.12      |      | -0.2  | 0.91      |      | 1.75  | 0.05  | Up   | Expressed protein                                             |
| Pc_TC118256 | 0.69  | 0.39  |      | -2.62 | 0.04      | Down | 0.43  | 0.74      |      | 0.87  | 0.32  |      | Expressed protein                                             |
| Pc_TC118268 | 0.34  | 0.52  |      | 0.67  | 0.28      |      | -2.5  | 0.03      | Down | -1.65 | 0.02  | Down | Expressed protein                                             |
| Pc_TC118281 | -2.58 | 0.07  |      | -3.19 | 0.05      |      | -3.74 | 0.05      | Down | 0     | 0     |      | Ribosomal protein S4 (RPS4A) family protein                   |
| Pc_TC118295 | 0.93  | 0.6   |      | 3.13  | 0.01      | Up   | 2.04  | 0.22      |      | 3.03  | 0.01  | Up   | Putative uncharacterized protein                              |
| Pc_TC118367 | 2.16  | 0.03  | Up   | 0.8   | 0.59      |      | -0.21 | 0.97      |      | 2.61  | 0.01  | Up   | Expressed protein                                             |
| Pc_TC118380 | 2.2   | 0     | Up   | 0     | 0         |      | 1.19  | 0.35      |      | 0.17  | 0.91  |      | Expressed protein                                             |
| Pc_TC118390 | 0     | 0     |      | -2.16 | 0.08      |      | -0.4  | 0.78      |      | -4.18 | 0     | Down | ATP synthase alpha/beta family protein                        |
| Pc_TC118393 | 2.15  | 0.01  | Up   | -0.05 | 1         |      | 2.53  | 0.05      | Up   | 1.37  | 0.18  |      | Expressed protein                                             |
| Pc_TC118395 | 0.76  | 0.3   |      | 0.99  | 0.23      |      | -2.92 | 0.04      | Down | -1.1  | 0.25  |      | Small heat shock protein                                      |
| Pc_TC118397 | 2.89  | ##### | Up   | 0     | 2.23E-006 |      | 2.01  | 0.06      |      | 0.58  | 0.45  |      | Expressed protein                                             |
| Pc_TC118413 | -0.04 | 0.97  |      | -0.5  | 0.53      |      | -2.94 | 0.02      | Down | -0.91 | 0.26  |      | Expressed protein                                             |
| Pc_TC118418 | -3.66 | ##### | Down | -4.68 | 1.02E-005 | Down | -1.15 | 0.31      |      | -3.12 | 0     | Down | Expressed protein                                             |
| Pc_TC118431 | -2.55 | 0.02  | Down | -1.34 | 0.2       |      | 0.5   | 0.69      |      | -0.45 | 0.65  |      | Expressed protein                                             |
| Pc_TC118432 | -1.32 | 0.12  |      | -0.78 | 0.4       |      | 1.9   | 0.08      |      | 1.65  | 0.03  | Up   | Expressed protein                                             |
| Pc_TC118443 | -0.57 | 0.2   |      | -1.3  | 0.03      | Down | 1.83  | 0.04      | Up   | 1.13  | 0.05  | Up   | Expressed protein                                             |
| Pc_TC118449 | 0.49  | 0.38  |      | 0.89  | 0.17      |      | -1.25 | 0.25      |      | -1.53 | 0.04  | Down | Expressed protein                                             |
| Pc_TC118450 | 1.82  | 0.29  |      | 1.47  | 0.49      |      | 4.75  | 0         | Up   | 4.15  | 0     | Up   | Expressed protein                                             |
| Pc_TC118468 | 1.43  | 0.16  |      | 2.55  | 0.01      | Up   | 1.5   | 0.29      |      | 1.78  | 0.09  |      | Expressed protein                                             |
| Pc_TC118470 | 0.34  | 0.85  |      | 0.06  | 1         |      | 3.04  | 0.02      | Up   | 1.89  | 0.08  |      | Expressed protein                                             |
| Pc_TC118475 | -1.68 | 0.05  | Down | -1.45 | 0.13      |      | 1.06  | 0.34      |      | 0.5   | 0.54  |      | Expressed protein                                             |
| Pc_TC118493 | 1.54  | 0.03  | Up   | 1.08  | 0.22      |      | -0.97 | 0.47      |      | 0.27  | 0.79  |      | Expressed protein                                             |
| Pc_TC118501 | 0.66  | 0.29  |      | 0.94  | 0.19      |      | -0.09 | 0.94      |      | 1.61  | 0.02  | Up   | Expressed protein                                             |
| Pc_TC118510 | 0.64  | 0.24  |      | 0.92  | 0.15      |      | -2.8  | 0.02      | Down | -0.77 | 0.29  |      | Expressed protein                                             |
| Pc_TC118524 | 2.1   | 0.01  | Up   | 0     | 0.02      |      | 1.15  | 0.4       |      | -0.37 | 0.81  |      | Uncharacterized protein                                       |
| Pc_TC118533 | 0.16  | 0.78  |      | -0.98 | 0.16      |      | 1.6   | 0.1       |      | 2.04  | 0     | Up   | Expressed protein                                             |
| Pc_TC118547 | 1.86  | 0.03  | Up   | 0     | 0.02      |      | 1.5   | 0.26      |      | -0.6  | 0.68  |      | RNA polymerase I-associated factor PAF67                      |
| Pc_TC118551 | -0.31 | 0.84  |      | -4.03 | 0.04      | Down | -0.12 | 0.97      |      | -1.14 | 0.38  |      | Uncharacterized protein                                       |
| Pc_TC118560 | 0.42  | 0.25  |      | 0.79  | 0.09      |      | -4.59 | 1.69E-005 | Down | -2.63 | ##### | Down | guanyl-nucleotide exchange factors;GTPase binding;GTP binding |
| Pc_TC118561 | 0.35  | 0.36  |      | 0.98  | 0.04      |      | -4.82 | 1.09E-005 | Down | -2.39 | 0     | Down | guanyl-nucleotide exchange factors;GTPase binding;GTP binding |
| Pc_TC118563 | 0.28  | 0.38  |      | 0.56  | 0.17      |      | -4.53 | 4.26E-006 | Down | -2.38 | ##### | Down | guanyl-nucleotide exchange factors;GTPase binding;GTP binding |
| Pc_TC118564 | 0.5   | 0.18  |      | 1.16  | 0.01      | Up   | -5.1  | 3.67E-006 | Down | -2.34 | 0     | Down | Uncharacterized protein                                       |
| Pc_TC118572 | -1.48 | 0.01  | Down | -0.61 | 0.35      |      | 0.99  | 0.31      |      | 1.52  | 0.01  | Up   | target of rapamycin                                           |
| Pc_TC118573 | -0.5  | 0.31  |      | 0.58  | 0.3       |      | 1.84  | 0.05      | Up   | 0.97  | 0.1   |      | target of rapamycin                                           |
| Pc_TC118574 | 0.76  | 0.14  |      | 0.63  | 0.32      |      | -1.01 | 0.34      |      | -2.43 | 0     | Down | target of rapamycin                                           |
| Pc_TC118589 | -1.13 | 0.19  |      | -1.23 | 0.22      |      | -1.2  | 0.35      |      | -2.13 | 0.04  | Down | Expressed protein                                             |
| Pc_TC118598 | -0.34 | 0.73  |      | 1.64  | 0.05      | Up   | -2.5  | 0.09      |      | -1.2  | 0.25  |      | Expressed protein                                             |
| Pc_TC118600 | -0.01 | 1     |      | 0.63  | 0.49      |      | 0     | 0         |      | -2.5  | 0.03  | Down | Uncharacterized protein                                       |
| Pc_TC118615 | -0.14 | 0.94  |      | -3.33 | 0.04      | Down | 0.07  | 1         |      | -1.77 | 0.16  |      | Uncharacterized protein                                       |
| Pc_TC118677 | -3.17 | 0.04  | Down | -1.87 | 0.19      |      | -4.74 | 0.03      | Down | -2.3  | 0.09  |      | Expressed protein                                             |
| Pc_TC118679 | 1.96  | 0     | Up   | 0     | 6.86E-006 |      | 0.99  | 0.37      |      | -0.63 | 0.46  |      | Expressed protein                                             |
| Pc_TC118682 | -1.19 | 0.03  | Down | -1.38 | 0.04      | Down | -0.4  | 0.7       |      | -0.6  | 0.37  |      | Expressed protein                                             |
| Pc_TC118686 | 2.57  | 0     | Up   | 0     | 0         |      | 2.72  | 0.02      | Up   | 1.73  | 0.04  | Up   | Expressed protein                                             |
| Pc_TC118709 | -0.18 | 0.86  |      | 0.72  | 0.42      |      | -4.67 | 0.01      | Down | -2.37 | 0.03  | Down | Expressed protein                                             |
| Pc_TC118752 | 1.76  | 0.01  | Up   | 0     | 0         |      | 1.03  | 0.39      |      | -0.01 | 1     |      | Expressed protein                                             |
| Pc_TC118776 | -1.02 | 0.23  |      | -1.41 | 0.15      |      | 2.32  | 0.03      | Up   | 0.76  | 0.36  |      | Expressed protein                                             |
| Pc_TC118779 | 0.08  | 0.97  |      | 0.66  | 0.49      |      | -1.77 | 0.22      |      | -3.23 | 0.01  | Down | Expressed protein                                             |
| Pc_TC118786 | -1.59 | 0.04  | Down | -0.94 | 0.27      |      | 0.89  | 0.42      |      | 0.46  | 0.56  |      | Expressed protein                                             |
| Pc_TC118800 | 3.06  | 0     | Up   | 0     | 0.11      |      | 2.57  | 0.07      |      | 0.95  | 0.49  |      | Expressed protein                                             |
| Pc_TC118813 | 0.12  | 0.92  |      | -1.42 | 0.18      |      | 4.2   | 0         | Up   | 0.59  | 0.5   |      | Expressed protein                                             |
| Pc_TC118817 | 0.8   | 0.38  |      | 1.98  | 0.03      | Up   | 0     | 0.01      |      | -0.7  | 0.57  |      | Expressed protein                                             |
| Pc_TC118834 | -0.26 | 0.82  |      | 0.87  | 0.34      |      | -4.35 | 0.01      | Down | -2.23 | 0.06  |      | Expressed protein                                             |
| Pc_TC118836 | 1.06  | 0.14  |      | 1.15  | 0.16      |      | -4.78 | 0.01      | Down | -2.2  | 0.04  | Down | Uncharacterized protein                                       |
| Pc_TC118869 | 0.32  | 0.74  |      | -0.17 | 0.91      |      | 2.74  | 0.02      | Up   | 2.17  | 0.01  | Up   | Os07g0541800 protein                                          |
| Pc_TC118878 | 1.66  | 0.04  | Up   | 0     | 0.01      |      | 1.31  | 0.31      |      | 0.26  | 0.85  |      | peroxin 3-1                                                   |
| Pc_TC118886 | 2.14  | 0.02  | Up   | 0     | 0.04      |      | 1.28  | 0.37      |      | 0.56  | 0.67  |      | zinc transporter 11 precursor                                 |
| Pc_TC118898 | -0.64 | 0.46  |      | -1.49 | 0.15      |      | 3.41  | 0         | Up   | 0.05  | 0.98  |      | Uncharacterized protein                                       |
| Pc_TC118902 | -1.62 | 0.29  |      | -0.06 | 1         |      | -1.39 | 0.44      |      | -4.08 | 0.04  | Down | Expressed protein                                             |
| Pc_TC118916 | 1.76  | 0     | Up   | 0     | 5.31E-006 |      | 1.53  | 0.16      |      | -0.05 | 0.97  |      | Translation protein SH3-like family protein                   |
| Pc_TC118918 | 0.23  | 0.73  |      | 1.5   | 0.03      | Up   | -2.42 | 0.05      | Down | -0.88 | 0.27  |      | Expressed protein                                             |
| Pc_TC118919 | -0.02 | 1     |      | 1.93  | 0.05      | Up   | -1.4  | 0.41      |      | -0.19 | 0.93  |      | Expressed protein                                             |

|             |       |       |      |  |       |           |      |  |       |      |      |       |      |      |                                                        |
|-------------|-------|-------|------|--|-------|-----------|------|--|-------|------|------|-------|------|------|--------------------------------------------------------|
| Pc_TC118924 | -0.82 | 0.23  |      |  | -0.56 | 0.47      |      |  | -4.29 | 0    | Down | -3.65 | 0    | Down | Expressed protein                                      |
| Pc_TC118941 | 0.13  | 0.92  |      |  | 1.66  | 0.05      |      |  | -4.3  | 0.02 | Down | -5.18 | 0    | Down | Expressed protein                                      |
| Pc_TC118947 | 4.03  | 0     | Up   |  | 0     | 0.67      |      |  | 4.09  | 0.02 | Up   | 1.43  | 0.58 |      | Expressed protein                                      |
| Pc_TC118956 | 1.62  | 0.01  | Up   |  | 0     | 4.13E-006 |      |  | 1.19  | 0.28 |      | 0.59  | 0.45 |      | Expressed protein                                      |
| Pc_TC118960 | 1.4   | 0.09  |      |  | 1.89  | 0.04      | Up   |  | -2.5  | 0.13 |      | -1.7  | 0.18 |      | Expressed protein                                      |
| Pc_TC118966 | -1.26 | 0.02  | Down |  | -0.54 | 0.39      |      |  | -0.2  | 0.84 |      | -0.44 | 0.5  |      | Expressed protein                                      |
| Pc_TC118968 | 1.12  | 0.01  | Up   |  | -1.85 | 0.01      | Down |  | -0.02 | 0.99 |      | -0.94 | 0.16 |      | Expressed protein                                      |
| Pc_TC118996 | 1.04  | 0.15  |      |  | 1.02  | 0.23      |      |  | 0     | 0    |      | -3.04 | 0.01 | Down | Expressed protein                                      |
| Pc_TC119010 | -1.77 | 0.18  |      |  | -0.3  | 0.85      |      |  | -1.67 | 0.3  |      | -2.96 | 0.05 | Down | Expressed protein                                      |
| Pc_TC119019 | 0.95  | 0.18  |      |  | 0.55  | 0.53      |      |  | -3.57 | 0.02 | Down | -0.01 | 1    |      | Expressed protein                                      |
| Pc_TC119027 | 0.48  | 0.63  |      |  | 0.96  | 0.33      |      |  | -2.96 | 0.08 |      | -3.83 | 0.01 | Down | Expressed protein                                      |
| Pc_TC119049 | 2.4   | 0     | Up   |  | 0     | 0.02      |      |  | 1.66  | 0.2  |      | 1.58  | 0.11 |      | cytochrome P450, family 97, subfamily B, polypeptide 3 |
| Pc_TC119053 | 0.46  | 0.56  |      |  | 0.64  | 0.46      |      |  | -3.82 | 0.01 | Down | -0.94 | 0.33 |      | Expressed protein                                      |
| Pc_TC119067 | 1.82  | 0.29  |      |  | 3.17  | 0.02      | Up   |  | 2.17  | 0.26 |      | 1.95  | 0.25 |      | Expressed protein                                      |
| Pc_TC119074 | -1.04 | 0.25  |      |  | -0.06 | 0.98      |      |  | -2.78 | 0.05 |      | -2.66 | 0.02 | Down | Expressed protein                                      |
| Pc_TC119081 | -2.11 | 0.05  | Down |  | -1.13 | 0.3       |      |  | -0.64 | 0.64 |      | 0.53  | 0.57 |      | Putative far-red impaired response protein             |
| Pc_TC119085 | -0.45 | 0.52  |      |  | -1.28 | 0.13      |      |  | 2.18  | 0.04 | Up   | -1.24 | 0.09 |      | Expressed protein                                      |
| Pc_TC119095 | 0.64  | 0.48  |      |  | 2.12  | 0.01      | Up   |  | 0     | 0    |      | -2.58 | 0.05 | Down | OSJNBa0072K14.13 protein                               |
| Pc_TC119096 | 0.93  | 0.35  |      |  | 1.77  | 0.07      |      |  | -4.4  | 0.05 | Down | -2.28 | 0.13 |      | Expressed protein                                      |
| Pc_TC119098 | -0.24 | 0.84  |      |  | -3.59 | 0.02      | Down |  | -1.14 | 0.43 |      | -1.43 | 0.21 |      | Expressed protein                                      |
| Pc_TC119107 | -0.51 | 1     |      |  | 2.06  | 0.24      |      |  | 4.95  | 0    | Up   | 4.11  | 0    | Up   | Expressed protein                                      |
| Pc_TC119108 | -1.24 | 0.14  |      |  | -3.59 | 0         | Down |  | 2.33  | 0.03 | Up   | 0.75  | 0.35 |      | Expressed protein                                      |
| Pc_TC119110 | -0.32 | 0.7   |      |  | -0.42 | 0.66      |      |  | -4.14 | 0.01 | Down | -2.85 | 0.01 | Down | Expressed protein                                      |
| Pc_TC119116 | -0.82 | 0.41  |      |  | -4.75 | 0.01      | Down |  | -0.17 | 0.92 |      | -0.23 | 0.85 |      | Expressed protein                                      |
| Pc_TC119135 | -3.24 | 0.01  | Down |  | -1.85 | 0.12      |      |  | -0.32 | 0.83 |      | -0.76 | 0.47 |      | Putative uncharacterized protein                       |
| Pc_TC119163 | 2.12  | 0.01  | Up   |  | 0     | 0.02      |      |  | 2.32  | 0.06 |      | 0.21  | 0.9  |      | Expressed protein                                      |
| Pc_TC119166 | -0.92 | 0.32  |      |  | -2.44 | 0.04      | Down |  | 1.18  | 0.32 |      | 0.37  | 0.7  |      | Expressed protein                                      |
| Pc_TC119179 | -0.44 | 0.84  |      |  | 2.49  | 0.02      | Up   |  | -1.82 | 0.37 |      | 0     | 0.03 |      | Expressed protein                                      |
| Pc_TC119183 | 1.89  | 0.03  | Up   |  | 2.95  | 0         | Up   |  | -0.3  | 0.89 |      | 1.72  | 0.08 |      | Expressed protein                                      |
| Pc_TC119200 | 1.64  | 0.02  | Up   |  | 0     | 0         |      |  | 2.14  | 0.06 |      | -0.49 | 0.61 |      | Leucine-rich repeat (LRR) family protein               |
| Pc_TC119213 | -3.09 | 0.04  | Down |  | -1.79 | 0.22      |      |  | -4.67 | 0.03 | Down | -3.54 | 0.03 | Down | Expressed protein                                      |
| Pc_TC119220 | -3.92 | 0.03  | Down |  | -1.94 | 0.21      |      |  | -0.33 | 0.86 |      | -0.79 | 0.55 |      | Expressed protein                                      |
| Pc_TC119227 | 0.6   | 0.22  |      |  | 1.19  | 0.04      | Up   |  | -3.04 | 0.01 | Down | -0.65 | 0.33 |      | Expressed protein                                      |
| Pc_TC119233 | 0.02  | 1     |      |  | 1     | 0.28      |      |  | -3.25 | 0.05 | Down | -2.81 | 0.03 | Down | Expressed protein                                      |
| Pc_TC119236 | -1.14 | 0.05  | Down |  | -0.37 | 0.58      |      |  | -0.73 | 0.48 |      | 0.11  | 0.87 |      | SET domain-containing protein                          |
| Pc_TC119246 | 0.34  | 0.85  |      |  | 2.29  | 0.03      | Up   |  | 0     | 0.05 |      | 0     | 0.03 |      | Expressed protein                                      |
| Pc_TC119251 | 0.51  | 0.48  |      |  | 2.22  | 0         | Up   |  | -4.2  | 0.01 | Down | -1.37 | 0.14 |      | Expressed protein                                      |
| Pc_TC119285 | 1.12  | 0.13  |      |  | 2.39  | 0         | Up   |  | -1.37 | 0.32 |      | -0.03 | 1    |      | Expressed protein                                      |
| Pc_TC119299 | 0     | 0     |      |  | 0     | 0.01      |      |  | -3.89 | 0.04 | Down | 0     | 0    |      | Expressed protein                                      |
| Pc_TC119305 | 1.27  | 0.11  |      |  | 1.22  | 0.18      |      |  | -4.14 | 0.02 | Down | -2.21 | 0.07 |      | Expressed protein                                      |
| Pc_TC119310 | 4.6   | ##### | Up   |  | 0     | 0.27      |      |  | 3.96  | 0.01 | Up   | 1     | 0.56 |      | Serine protease inhibitor (SERPIN) family protein      |
| Pc_TC119311 | 3.4   | 0     | Up   |  | 0     | 0.27      |      |  | 4.49  | 0    | Up   | 1.89  | 0.17 |      | Serine protease inhibitor (SERPIN) family protein      |
| Pc_TC119312 | 2.49  | 0     | Up   |  | 0     | 0.02      |      |  | 2.57  | 0.04 | Up   | -0.57 | 0.68 |      | Serine protease inhibitor (SERPIN) family protein      |
| Pc_TC119313 | 4.15  | ##### | Up   |  | 0     | 0.15      |      |  | 4.27  | 0    | Up   | -0.86 | 0.69 |      | Serine protease inhibitor (SERPIN) family protein      |
| Pc_TC119314 | 3.16  | ##### | Up   |  | 0     | 0         |      |  | 3.82  | 0    | Up   | -0.14 | 0.9  |      | Serine protease inhibitor (SERPIN) family protein      |
| Pc_TC119323 | -0.19 | 0.61  |      |  | -0.12 | 0.79      |      |  | -0.72 | 0.42 |      | -1.32 | 0.02 | Down | Expressed protein                                      |
| Pc_TC119331 | 1.67  | ##### | Up   |  | 0     | 3.47E-030 |      |  | 1.04  | 0.22 |      | 0.45  | 0.39 |      | Expressed protein                                      |
| Pc_TC119348 | 0.64  | 0.4   |      |  | 0.49  | 0.59      |      |  | -0.17 | 0.9  |      | 1.91  | 0.01 | Up   | Expressed protein                                      |
| Pc_TC119359 | 0.47  | 0.21  |      |  | 0.37  | 0.44      |      |  | -2.18 | 0.02 | Down | -1.39 | 0.02 | Down | Expressed protein                                      |
| Pc_TC119370 | -2.14 | 0.03  | Down |  | -1.01 | 0.31      |      |  | 2.43  | 0.03 | Up   | 0.79  | 0.35 |      | Expressed protein                                      |
| Pc_TC119372 | 0.88  | 0.15  |      |  | 2.9   | 4.94E-006 | Up   |  | -4.25 | 0    | Down | -0.74 | 0.36 |      | Os10g0568300 protein                                   |
| Pc_TC119391 | 3.66  | 0     | Up   |  | 1.52  | 0.39      |      |  | 3.36  | 0.03 | Up   | 2.38  | 0.08 |      | Expressed protein                                      |
| Pc_TC119392 | -2.68 | 0     | Down |  | -2.89 | 0         | Down |  | -1.39 | 0.22 |      | -2.88 | 0    | Down | Expressed protein                                      |
| Pc_TC119393 | -1.94 | 0.01  | Down |  | -3.13 | 0         | Down |  | 0.42  | 0.71 |      | -0.34 | 0.69 |      | Expressed protein                                      |
| Pc_TC119397 | 0.66  | 0.44  |      |  | 1.75  | 0.04      | Up   |  | -2.88 | 0.07 |      | -2.08 | 0.08 |      | DNA polymerase                                         |
| Pc_TC119408 | -0.21 | 0.86  |      |  | -0.29 | 0.81      |      |  | -3.72 | 0.03 | Down | -1.86 | 0.1  |      | Putative reverse transcriptase                         |
| Pc_TC119431 | -2.73 | 0.05  | Down |  | 0     | 0.01      |      |  | 0     | 0.01 |      | -3.77 | 0.01 | Down | Ribosomal protein S8 family protein                    |
| Pc_TC119458 | 0.64  | 0.41  |      |  | 0.72  | 0.42      |      |  | -3.34 | 0.03 | Down | -1.96 | 0.07 |      | DNAJ heat shock N-terminal domain-containing protein   |
| Pc_TC119464 | 0.02  | 1     |      |  | -0.18 | 0.86      |      |  | -4.2  | 0.01 | Down | -1.49 | 0.11 |      | OSIGBa0145N07.10 protein                               |
| Pc_TC119483 | 2.18  | 0.01  | Up   |  | 1.3   | 0.23      |      |  | -0.84 | 0.63 |      | 0.63  | 0.6  |      | Expressed protein                                      |
| Pc_TC119496 | 0.16  | 0.79  |      |  | -0.2  | 0.78      |      |  | -1.44 | 0.19 |      | -1.62 | 0.03 | Down | Expressed protein                                      |
| Pc_TC119498 | -0.04 | 1     |      |  | -0.32 | 0.76      |      |  | -1.32 | 0.32 |      | -2.08 | 0.05 | Down | Expressed protein                                      |

|             |       |       |      |       |           |      |       |           |      |       |       |      |                                                                          |
|-------------|-------|-------|------|-------|-----------|------|-------|-----------|------|-------|-------|------|--------------------------------------------------------------------------|
| Pc_TC119501 | -0.21 | 0.6   |      | -0.12 | 0.82      |      | -1.73 | 0.07      |      | -1.22 | 0.04  | Down | Expressed protein                                                        |
| Pc_TC119505 | -1.05 | 0.26  |      | -2.75 | 0.03      | Down | 1.26  | 0.28      |      | 0.65  | 0.47  |      | putative Ty1-copia subclass                                              |
| Pc_TC119516 | 0.56  | 0.52  |      | 0.68  | 0.48      |      | -3.72 | 0.03      | Down | -2.01 | 0.08  |      | autoinhibited Ca2+ -ATPase, isoform 8                                    |
| Pc_TC119526 | 1.08  | 0.27  |      | 2.77  | 0         | Up   | 0.84  | 0.56      |      | 0.63  | 0.59  |      | ribosomal protein L18                                                    |
| Pc_TC119536 | 0.85  | 0.32  |      | 2.19  | 0.01      | Up   | -3.08 | 0.06      |      | 0.5   | 0.63  |      | Expressed protein                                                        |
| Pc_TC119556 | 0.67  | 0.04  |      | -0.31 | 0.47      |      | -2.86 | 0         | Down | -0.04 | 0.93  |      | Expressed protein                                                        |
| Pc_TC119594 | 4.54  | 0     | Up   | 0     | 0.67      |      | 2.67  | 0.2       |      | 1.21  | 0.69  |      | Expressed protein                                                        |
| Pc_TC119610 | 1.3   | 0.25  |      | 2.21  | 0.04      | Up   | 0.14  | 1         |      | -0.37 | 0.87  |      | Expressed protein                                                        |
| Pc_TC119625 | -3.78 | 0.01  | Down | -0.63 | 0.57      |      | -1.55 | 0.28      |      | -3.23 | 0.01  | Down | 30S ribosomal protein S15                                                |
| Pc_TC119627 | 1.85  | 0     | Up   | 0.18  | 0.86      |      | 1.13  | 0.32      |      | 1.17  | 0.14  |      | Uncharacterized protein                                                  |
| Pc_TC119632 | 1.27  | 0.11  |      | 2.16  | 0.01      | Up   | -1.27 | 0.39      |      | 1.98  | 0.02  | Up   | Expressed protein                                                        |
| Pc_TC119636 | 0.65  | 0.35  |      | 0.19  | 0.84      |      | -3.58 | 0.01      | Down | -1.88 | 0.05  |      | Expressed protein                                                        |
| Pc_TC119647 | -0.03 | 0.97  |      | 1.04  | 0.09      |      | -2.73 | 0.02      | Down | -0.53 | 0.45  |      | Expressed protein                                                        |
| Pc_TC119648 | 1.75  | 0.02  | Up   | 0     | 0         |      | 1.72  | 0.15      |      | -0.23 | 0.85  |      | P-loop containing nucleoside triphosphate hydrolases superfamily protein |
| Pc_TC119654 | 1.31  | 0.03  | Up   | 1.28  | 0.07      |      | -1.71 | 0.15      |      | 0.52  | 0.49  |      | Expressed protein                                                        |
| Pc_TC119656 | -3.92 | 0.03  | Down | -0.13 | 0.97      |      | -2.5  | 0.16      |      | -2.37 | 0.11  |      | Expressed protein                                                        |
| Pc_TC119675 | -0.73 | 0.47  |      | 0.54  | 0.59      |      | -2.3  | 0.12      |      | -3.6  | 0.01  | Down | Expressed protein                                                        |
| Pc_TC119679 | 1.93  | 0.02  | Up   | 0     | 0.02      |      | 2.44  | 0.05      |      | 0.24  | 0.88  |      | GLU-ADT subunit B                                                        |
| Pc_TC119682 | 1.26  | 0.05  | Up   | 1.11  | 0.14      |      | -0.23 | 0.85      |      | -0.42 | 0.63  |      | Expressed protein                                                        |
| Pc_TC119687 | -0.31 | 0.63  |      | 0.15  | 0.84      |      | -2.75 | 0.02      | Down | -1.28 | 0.09  |      | Expressed protein                                                        |
| Pc_TC119696 | -3.73 | 0.05  | Down | -1.75 | 0.28      |      | -0.6  | 0.73      |      | -1.86 | 0.21  |      | Expressed protein                                                        |
| Pc_TC119703 | 0.44  | 0.73  |      | 2.44  | 0.01      | Up   | -4.3  | 0.06      |      | -1.18 | 0.4   |      | Putative polyprotein                                                     |
| Pc_TC119719 | -3.04 | 0.02  | Down | -3.64 | 0.02      | Down | 1.16  | 0.35      |      | -0.37 | 0.74  |      | Expressed protein                                                        |
| Pc_TC119730 | 0.44  | 0.66  |      | 1.47  | 0.11      |      | -3.89 | 0.04      | Down | -1.6  | 0.2   |      | Expressed protein                                                        |
| Pc_TC119740 | -1.6  | 0.05  | Down | -0.77 | 0.38      |      | 0.12  | 0.93      |      | -0.17 | 0.86  |      | Expressed protein                                                        |
| Pc_TC119749 | -2.31 | 0.01  | Down | -1.69 | 0.09      |      | 0.12  | 0.94      |      | -1.12 | 0.23  |      | Uncharacterized protein                                                  |
| Pc_TC119753 | 0.44  | 0.62  |      | -0.05 | 1         |      | 2.55  | 0.03      | Up   | 1.24  | 0.16  |      | Putative uncharacterized protein                                         |
| Pc_TC119764 | -1    | 0.21  |      | -1.97 | 0.04      | Down | -0.55 | 0.65      |      | -0.78 | 0.37  |      | Expressed protein                                                        |
| Pc_TC119783 | 2.78  | 0.02  | Up   | 2.92  | 0.03      | Up   | 0     | 0.26      |      | -1.37 | 0.66  |      | Expressed protein                                                        |
| Pc_TC119789 | 0.01  | 1     |      | -3.47 | 0.03      | Down | 0.81  | 0.53      |      | -3.31 | 0.02  | Down | Expressed protein                                                        |
| Pc_TC119804 | 2.27  | 0.03  | Up   | 0     | 0.15      |      | 1.6   | 0.31      |      | -0.01 | 1     |      | Expressed protein                                                        |
| Pc_TC119823 | 2.1   | 0     | Up   | 0     | 0         |      | 1.52  | 0.2       |      | -0.05 | 0.99  |      | Os02g0496500 protein                                                     |
| Pc_TC119839 | 3.3   | 0.01  | Up   | 0     | 0.48      |      | -0.08 | 1         |      | 0     | 0.35  |      | Expressed protein                                                        |
| Pc_TC119858 | 0.7   | 0.35  |      | 2.18  | 0         | Up   | 0.05  | 0.99      |      | 0.92  | 0.27  |      | Expressed protein                                                        |
| Pc_TC119859 | 3.22  | ##### | Up   | 2.65  | 0         | Up   | 2.78  | 0.02      | Up   | 2.72  | 0     | Up   | Expressed protein                                                        |
| Pc_TC119860 | -1.59 | 0.01  | Down | -0.46 | 0.5       |      | 0.24  | 0.82      |      | -0.86 | 0.22  |      | Expressed protein                                                        |
| Pc_TC119875 | 0.08  | 0.98  |      | 0.06  | 1         |      | -3.56 | 0.04      | Down | -0.43 | 0.71  |      | Expressed protein                                                        |
| Pc_TC119881 | -3.92 | 0     | Down | 0     | 0         |      | 0     | 0         |      | 0     | 0     |      | PDI-like 1-4                                                             |
| Pc_TC119890 | 2.1   | 0     | Up   | 0     | 0         |      | 1.87  | 0.11      |      | -0.13 | 0.93  |      | Expressed protein                                                        |
| Pc_TC119910 | 1.92  | 0     | Up   | 0     | 1.15E-007 |      | 1.47  | 0.16      |      | -0.29 | 0.71  |      | Expressed protein                                                        |
| Pc_TC119934 | -5.05 | 0     | Down | 0     | 0         |      | 0     | 0         |      | 0     | ##### |      | Expressed protein                                                        |
| Pc_TC119940 | -0.34 | 0.69  |      | 0.62  | 0.46      |      | -3.76 | 0.01      | Down | -1.71 | 0.08  |      | Expressed protein                                                        |
| Pc_TC119943 | 0.66  | 0.49  |      | 1.95  | 0.03      | Up   | -0.23 | 0.9       |      | 0.51  | 0.64  |      | Expressed protein                                                        |
| Pc_TC119974 | 0.08  | 0.92  |      | 1.46  | 0.03      | Up   | -2.6  | 0.04      | Down | 0     | 1     |      | Expressed protein                                                        |
| Pc_TC119980 | 1.73  | 0     | Up   | 1.83  | 0.01      | Up   | 1.4   | 0.18      |      | 1.39  | 0.05  | Up   | FKBP-type peptidyl-prolyl cis-trans isomerase family protein             |
| Pc_TC119993 | 1.51  | 0.01  | Up   | 0     | 1.98E-006 |      | 1.8   | 0.09      |      | 0.06  | 0.96  |      | delta 1-pyrroline-5-carboxylate synthase 2                               |
| Pc_TC120009 | -0.09 | 1     |      | 0.7   | 0.53      |      | 0.29  | 0.87      |      | -3.54 | 0.03  | Down | Expressed protein                                                        |
| Pc_TC120011 | -2.96 | ##### | Down | -0.75 | 0.27      |      | -0.49 | 0.63      |      | -0.02 | 0.99  |      | F-box/RNI-like superfamily protein                                       |
| Pc_TC120012 | 0.52  | 0.32  |      | -1.41 | 0.05      | Down | 0.99  | 0.32      |      | -0.29 | 0.68  |      | F-box/RNI-like superfamily protein                                       |
| Pc_TC120015 | -0.18 | 0.87  |      | 0.85  | 0.33      |      | 0     | 0         |      | -3.26 | 0.01  | Down | Expressed protein                                                        |
| Pc_TC120016 | 0.14  | 0.86  |      | 0.53  | 0.5       |      | -3.98 | 0.01      | Down | -1.4  | 0.11  |      | Expressed protein                                                        |
| Pc_TC120033 | 0.04  | 0.97  |      | 0.37  | 0.63      |      | 0     | 2.25E-005 |      | -4.73 | ##### | Down | Expressed protein                                                        |
| Pc_TC120035 | 0     | 0.64  |      | 1.06  | 0.8       |      | 3.96  | 0.02      | Up   | 2.08  | 0.3   |      | Expressed protein                                                        |
| Pc_TC120044 | 4.4   | 0.01  | Up   | 3.38  | 0.14      |      | 0     | 0.87      |      | 0     | 0.9   |      | Expressed protein                                                        |
| Pc_TC120051 | 0.82  | 0.11  |      | 2.17  | 0         | Up   | -4.21 | 0         | Down | -1.43 | 0.05  | Down | Expressed protein                                                        |
| Pc_TC120080 | 0.51  | 0.5   |      | 1.33  | 0.09      |      | -2.92 | 0.04      | Down | -1.48 | 0.13  |      | Expressed protein                                                        |
| Pc_TC120088 | -2.57 | 0     | Down | 0.39  | 0.6       |      | -1.03 | 0.36      |      | 0.02  | 0.99  |      | Expressed protein                                                        |
| Pc_TC120105 | 0.24  | 0.8   |      | 0.26  | 0.81      |      | -1.19 | 0.38      |      | -2.88 | 0.01  | Down | Uncharacterized protein (Fragment)                                       |
| Pc_TC120117 | -2.51 | 0.02  | Down | -1.3  | 0.22      |      | -0.02 | 1         |      | -0.79 | 0.43  |      | Expressed protein                                                        |
| Pc_TC120124 | -0.36 | 0.78  |      | 0.33  | 0.8       |      | -4.74 | 0.03      | Down | -3.04 | 0.04  | Down | Expressed protein                                                        |
| Pc_TC120133 | -4.41 | 0     | Down | -2.43 | 0.03      | Down | -2.29 | 0.09      |      | -4.28 | 0     | Down | Expressed protein                                                        |
| Pc_TC120144 | -0.22 | 0.7   |      | 1.71  | 0         | Up   | -1.94 | 0.08      |      | -2.19 | 0     | Down | Expressed protein                                                        |



|             |       |       |      |  |       |           |      |  |       |           |      |       |      |      |                                                |
|-------------|-------|-------|------|--|-------|-----------|------|--|-------|-----------|------|-------|------|------|------------------------------------------------|
| Pc_TC120154 | 0.1   | 0.91  |      |  | -0.37 | 0.69      |      |  | -2.58 | 0.05      |      | -2.16 | 0.03 | Down | Expressed protein                              |
| Pc_TC120170 | 1.21  | 0.19  |      |  | 2.34  | 0.01      | Up   |  | -3.5  | 0.08      |      | 0     | 0.01 |      | Expressed protein                              |
| Pc_TC120184 | 3.06  | 0     | Up   |  | 0     | 0.07      |      |  | 2.41  | 0.07      |      | 1     | 0.42 |      | Expressed protein                              |
| Pc_TC120214 | 2.71  | 0     | Up   |  | 0     | 0.01      |      |  | 2.23  | 0.07      |      | 1.86  | 0.04 | Up   | NADH-dependent glutamate synthase 1            |
| Pc_TC120224 | -1.84 | 0.02  | Down |  | -1.67 | 0.05      |      |  | 2.44  | 0.02      | Up   | 0.77  | 0.29 |      | Expressed protein                              |
| Pc_TC120232 | 1.7   | 0     | Up   |  | 0     | 5.10E-011 |      |  | 1.27  | 0.2       |      | -0.27 | 0.7  |      | Ribosomal protein L1p/L10e family              |
| Pc_TC120233 | -0.63 | 0.51  |      |  | 0.43  | 0.67      |      |  | -3.13 | 0.05      | Down | -2.33 | 0.04 | Down | Expressed protein                              |
| Pc_TC120241 | 0.26  | 0.82  |      |  | -3.47 | 0.03      | Down |  | 0     | 0         |      | 0     | 0    |      | Expressed protein                              |
| Pc_TC120252 | -1.14 | 0.26  |      |  | -3.75 | 0.01      | Down |  | 0.6   | 0.64      |      | -0.09 | 0.96 |      | Expressed protein                              |
| Pc_TC120253 | 0     | 0.12  |      |  | -0.75 | 0.78      |      |  | 2.89  | 0.04      | Up   | 1.68  | 0.18 |      | Polycomb group protein EMBRYONIC FLOWER 2      |
| Pc_TC120275 | 0.85  | 0.06  |      |  | 1.28  | 0.02      | Up   |  | -3.61 | 0         | Down | -0.5  | 0.44 |      | Expressed protein                              |
| Pc_TC120276 | -0.69 | 0.3   |      |  | -4.32 | 2.82E-005 | Down |  | -3.29 | 0.01      | Down | -2.22 | 0.01 | Down | Expressed protein                              |
| Pc_TC120291 | 0.08  | 0.93  |      |  | -0.43 | 0.62      |      |  | 2.95  | 0.01      | Up   | 1.42  | 0.05 |      | Expressed protein                              |
| Pc_TC120305 | 1.75  | 0     | Up   |  | -5.71 | 1.16E-006 | Down |  | 1.8   | 0.08      |      | 0     | 1    |      | Ribosomal protein S30 family protein           |
| Pc_TC120338 | 0.36  | 0.53  |      |  | 0.65  | 0.33      |      |  | -2.45 | 0.03      | Down | 0.57  | 0.41 |      | Expressed protein                              |
| Pc_TC120341 | -2.09 | 0     | Down |  | -1.09 | 0.1       |      |  | -1.09 | 0.29      |      | -2.74 | 0    | Down | Expressed protein                              |
| Pc_TC120377 | -2.57 | 0.01  | Down |  | -3.26 | 0         | Down |  | -5.14 | 0         | Down | -4.02 | 0    | Down | Expressed protein                              |
| Pc_TC120388 | 1.89  | 0     | Up   |  | 0     | 0         |      |  | 1.62  | 0.16      |      | 0.03  | 1    |      | vacuolar ATP synthase subunit H family protein |
| Pc_TC120431 | 0.66  | 0.44  |      |  | 0.26  | 0.82      |      |  | 3.05  | 0.01      | Up   | 1.55  | 0.07 |      | Expressed protein                              |
| Pc_TC120432 | 0     | 0     |      |  | -3.33 | 0.04      | Down |  | 0     | 0.01      |      | -3.77 | 0.01 | Down | Putative polyprotein                           |
| Pc_TC120438 | -0.53 | 0.23  |      |  | -1    | 0.08      |      |  | 2.32  | 0.01      | Up   | 1.2   | 0.03 | Up   | Expressed protein                              |
| Pc_TC120491 | 1.08  | 0.43  |      |  | 1.57  | 0.24      |      |  | 2.58  | 0.07      |      | 3.53  | 0    | Up   | homolog of yeast oxidase assembly 1 (OXA1)     |
| Pc_TC120493 | -1.15 | 0.03  | Down |  | -1.36 | 0.03      | Down |  | 0.29  | 0.77      |      | -0.38 | 0.55 |      | homolog of yeast oxidase assembly 1 (OXA1)     |
| Pc_TC120509 | 2.19  | ##### | Up   |  | 0     | 1.28E-007 |      |  | 1.71  | 0.1       |      | 0.09  | 0.92 |      | Ribosomal protein S19e family protein          |
| Pc_TC120543 | 0.12  | 0.88  |      |  | 0.2   | 0.81      |      |  | -1.59 | 0.19      |      | -2.83 | 0    | Down | Expressed protein                              |
| Pc_TC120546 | 1.46  | 0.02  | Up   |  | 0     | 2.30E-005 |      |  | 1.19  | 0.28      |      | -0.06 | 0.97 |      | Expressed protein                              |
| Pc_TC120552 | 0.57  | 0.18  |      |  | 0.44  | 0.42      |      |  | -4.97 | 2.84E-005 | Down | -2.26 | 0    | Down | Expressed protein                              |
| Pc_TC120558 | 1.39  | 0.05  | Up   |  | 1.31  | 0.11      |      |  | 0.52  | 0.67      |      | 0.83  | 0.34 |      | Expressed protein                              |
| Pc_TC120562 | -3.92 | 0.03  | Down |  | -0.62 | 0.67      |      |  | -0.33 | 0.86      |      | -1.37 | 0.31 |      | Expressed protein                              |
| Pc_TC120568 | -0.54 | 0.65  |      |  | -4.26 | 0.02      | Down |  | -0.23 | 0.9       |      | 0     | 1    |      | Expressed protein                              |
| Pc_TC120580 | 2.04  | 0     | Up   |  | 0     | 0         |      |  | 1.31  | 0.28      |      | 0.72  | 0.44 |      | Expressed protein                              |
| Pc_TC120584 | -3.73 | 0.05  | Down |  | -0.75 | 0.63      |      |  | -0.22 | 0.93      |      | -0.37 | 0.81 |      | Expressed protein                              |
| Pc_TC120585 | 0.15  | 0.93  |      |  | -2.26 | 0.12      |      |  | -3.82 | 0.04      | Down | -0.37 | 0.77 |      | Expressed protein                              |
| Pc_TC120589 | -0.01 | 1     |      |  | 0.18  | 0.88      |      |  | -3.3  | 0.03      | Down | -0.65 | 0.52 |      | Os05g0534800 protein                           |
| Pc_TC120598 | -1.37 | 0.18  |      |  | 0.28  | 0.8       |      |  | -5.4  | 0.01      | Down | -1.96 | 0.08 |      | Expressed protein                              |
| Pc_TC120600 | -1.26 | 0.14  |      |  | -2.72 | 0.01      | Down |  | -3.5  | 0.02      | Down | -3.64 | 0    | Down | Ribosomal protein L1p/L10e family              |
| Pc_TC120603 | -0.23 | 0.85  |      |  | 0.57  | 0.57      |      |  | -2.61 | 0.1       |      | -4.08 | 0.01 | Down | Expressed protein                              |
| Pc_TC120604 | -0.56 | 0.58  |      |  | -0.84 | 0.46      |      |  | 3.35  | 0         | Up   | 1.01  | 0.26 |      | Expressed protein                              |
| Pc_TC120621 | -1.81 | 0.06  |      |  | -0.76 | 0.46      |      |  | -1.31 | 0.32      |      | -2.26 | 0.04 | Down | Expressed protein                              |
| Pc_TC120626 | -2.2  | 0.04  | Down |  | 0.99  | 0.25      |      |  | -3.58 | 0.02      | Down | -2.65 | 0.02 | Down | Expressed protein                              |
| Pc_TC120669 | -2.65 | 0     | Down |  | -2.67 | 0.01      | Down |  | -2.52 | 0.06      |      | -1.3  | 0.16 |      | Expressed protein                              |
| Pc_TC120670 | -0.05 | 1     |      |  | 0.96  | 0.31      |      |  | -3.08 | 0.06      |      | -3.96 | 0.01 | Down | Expressed protein                              |
| Pc_TC120674 | 2.62  | 0     | Up   |  | 0     | 0         |      |  | 1.66  | 0.18      |      | -0.37 | 0.76 |      | Expressed protein                              |
| Pc_TC120685 | 0.66  | 0.26  |      |  | 0.99  | 0.14      |      |  | -3.54 | 0.01      | Down | -1.39 | 0.08 |      | Expressed protein                              |
| Pc_TC120699 | 0.38  | 0.79  |      |  | -0.06 | 1         |      |  | -1.2  | 0.5       |      | -4.08 | 0.04 | Down | Expressed protein                              |
| Pc_TC120718 | -4.17 | 0.02  | Down |  | -1.38 | 0.31      |      |  | 1.11  | 0.4       |      | 0.96  | 0.34 |      | Expressed protein                              |
| Pc_TC120749 | -0.51 | 0.72  |      |  | -0.15 | 0.97      |      |  | 2.57  | 0.04      | Up   | 1.5   | 0.13 |      | Expressed protein                              |
| Pc_TC120750 | -2.85 | 0.01  | Down |  | -0.8  | 0.43      |      |  | -3.16 | 0.03      | Down | -1.23 | 0.22 |      | Expressed protein                              |
| Pc_TC120759 | 0.78  | 0.32  |      |  | 2.79  | 0         | Up   |  | -0.04 | 1         |      | 0.08  | 0.96 |      | Nucleic acid-binding,OB-fold-like protein      |
| Pc_TC120770 | 0.02  | 1     |      |  | -0.62 | 0.61      |      |  | 0     | 0         |      | -2.96 | 0.03 | Down | Expressed protein                              |
| Pc_TC120774 | 0.43  | 0.44  |      |  | 0.53  | 0.42      |      |  | -2.31 | 0.04      | Down | -1.65 | 0.03 | Down | Expressed protein                              |
| Pc_TC120805 | -1.24 | 0.47  |      |  | -0.68 | 0.73      |      |  | 2.62  | 0.05      | Up   | 0     | 1    |      | Expressed protein                              |
| Pc_TC120829 | 4.56  | ##### | Up   |  | 0     | 0.48      |      |  | 1.24  | 0.62      |      | 0     | 0.35 |      | Expressed protein                              |
| Pc_TC120837 | -0.57 | 0.61  |      |  | -1.4  | 0.28      |      |  | 0.21  | 0.9       |      | -3.25 | 0.02 | Down | Expressed protein                              |
| Pc_TC120838 | 0.79  | 0.51  |      |  | 2.51  | 0.01      | Up   |  | -1.63 | 0.4       |      | -0.25 | 0.92 |      | Expressed protein                              |
| Pc_TC120874 | -0.4  | 0.6   |      |  | -1.39 | 0.13      |      |  | 2.33  | 0.03      | Up   | 1.28  | 0.09 |      | Expressed protein                              |
| Pc_TC120882 | -0.05 | 0.94  |      |  | -0.18 | 0.8       |      |  | -2.34 | 0.04      | Down | -0.86 | 0.25 |      | Expressed protein                              |
| Pc_TC120885 | 1.5   | 0.02  | Up   |  | 0     | 3.04E-005 |      |  | 0.7   | 0.54      |      | -0.14 | 0.89 |      | membrane steroid binding protein 1             |
| Pc_TC120900 | -0.42 | 0.63  |      |  | -0.26 | 0.81      |      |  | -2.53 | 0.07      |      | -2.03 | 0.05 | Down | Expressed protein                              |
| Pc_TC120906 | 0.99  | 0.16  |      |  | 2.09  | 0.01      | Up   |  | -0.03 | 1         |      | -0.31 | 0.75 |      | Ribosomal L38e protein family                  |
| Pc_TC120920 | -0.6  | 0.58  |      |  | -0.83 | 0.49      |      |  | -2.27 | 0.14      |      | -2.64 | 0.04 | Down | Expressed protein                              |
| Pc_TC120921 | 0.25  | 0.87  |      |  | -0.94 | 0.52      |      |  | 0     | 0.01      |      | -3.37 | 0.04 | Down | Expressed protein                              |

|             |       |       |      |  |       |           |      |       |           |      |       |       |      |                                                   |
|-------------|-------|-------|------|--|-------|-----------|------|-------|-----------|------|-------|-------|------|---------------------------------------------------|
| Pc_TC120932 | -1.73 | 0.44  |      |  | -0.43 | 0.91      |      | 3.37  | 0.01      | Up   | -0.37 | 0.91  |      | Expressed protein                                 |
| Pc_TC120947 | 0.08  | 0.94  |      |  | -0.08 | 0.95      |      | -2.93 | 0.03      | Down | -2.81 | 0.01  | Down | Expressed protein                                 |
| Pc_TC120958 | 0.6   | 0.57  |      |  | -0.13 | 0.97      |      | 2.13  | 0.09      |      | 2.2   | 0.02  | Up   | Expressed protein                                 |
| Pc_TC120970 | 0.36  | 0.72  |      |  | 1.51  | 0.09      |      | -4.02 | 0.03      | Down | -2.31 | 0.07  |      | Uncharacterized protein                           |
| Pc_TC120976 | 1.35  | 0.07  |      |  | 1.93  | 0.02      | Up   | -0.1  | 0.96      |      | 0.53  | 0.57  |      | Expressed protein                                 |
| Pc_TC120979 | 0.29  | 0.72  |      |  | 1.03  | 0.2       |      | -2.4  | 0.08      |      | -2.87 | 0.01  | Down | Expressed protein                                 |
| Pc_TC120980 | 1.52  | 0.21  |      |  | 2.54  | 0.03      | Up   | 0     | 0.11      |      | 0.14  | 1     |      | Expressed protein                                 |
| Pc_TC120987 | 2.66  | 0.01  | Up   |  | 0     | 0.15      |      | 0.7   | 0.73      |      | -0.18 | 1     |      | Signal recognition particle,SRP54 subunit protein |
| Pc_TC120991 | -3.78 | 0.01  | Down |  | -4.8  | 0         | Down | -2.55 | 0.09      |      | -4.23 | 0     | Down | actin 7                                           |
| Pc_TC120995 | 2.28  | ##### | Up   |  | -5.35 | 1.09E-005 | Down | 1.44  | 0.17      |      | 0.1   | 0.91  |      | Translation protein SH3-like family protein       |
| Pc_TC121000 | -2.92 | 0.03  | Down |  | -1.53 | 0.22      |      | 0.44  | 0.75      |      | -0.01 | 1     |      | Expressed protein                                 |
| Pc_TC121027 | 1.83  | 0.01  | Up   |  | 0.42  | 0.66      |      | 1.17  | 0.32      |      | 1.47  | 0.07  |      | Expressed protein                                 |
| Pc_TC121032 | -1.24 | 0.25  |      |  | -0.34 | 0.79      |      | -2.56 | 0.1       |      | -2.7  | 0.04  | Down | Expressed protein                                 |
| Pc_TC121038 | -0.24 | 0.95  |      |  | -0.68 | 0.73      |      | 2.74  | 0.04      | Up   | 1.55  | 0.17  |      | Expressed protein                                 |
| Pc_TC121044 | -0.15 | 0.9   |      |  | -0.44 | 0.68      |      | -1.19 | 0.38      |      | -2.65 | 0.02  | Down | Expressed protein                                 |
| Pc_TC121056 | -3.73 | 0.05  | Down |  | -0.29 | 0.89      |      | -0.22 | 0.93      |      | -0.6  | 0.68  |      | Expressed protein                                 |
| Pc_TC121066 | 0.25  | 0.74  |      |  | 0.06  | 0.97      |      | -3.44 | 0.02      | Down | -1.88 | 0.05  | Down | Expressed protein                                 |
| Pc_TC121069 | 0.08  | 0.95  |      |  | 1.41  | 0.08      |      | -1.61 | 0.22      |      | -2.27 | 0.03  | Down | Expressed protein                                 |
| Pc_TC121076 | 1.72  | 0     | Up   |  | 0     | 6.03E-006 |      | 1.71  | 0.11      |      | 0.75  | 0.34  |      | Expressed protein                                 |
| Pc_TC121088 | 1.28  | 0.07  |      |  | 1.97  | 0.01      | Up   | -5.71 | 0         | Down | -0.45 | 0.65  |      | Expressed protein                                 |
| Pc_TC121089 | -0.47 | 0.68  |      |  | -2.08 | 0.13      |      | 0     | 0.01      |      | -3.83 | 0.01  | Down | Expressed protein                                 |
| Pc_TC121095 | 1.05  | 0.17  |      |  | 1.64  | 0.05      | Up   | -3.4  | 0.03      | Down | -2.28 | 0.05  | Down | Expressed protein                                 |
| Pc_TC121110 | -0.05 | 0.98  |      |  | -0.5  | 0.6       |      | -3.24 | 0.02      | Down | -1.93 | 0.05  |      | Expressed protein                                 |
| Pc_TC121131 | -5.08 | ##### | Down |  | 0     | 4.37E-015 |      | -0.83 | 0.4       |      | -3.9  | ##### | Down | Putative uncharacterized protein OSJNBa0016D04.32 |
| Pc_TC121132 | -4.79 | ##### | Down |  | -4.81 | 3.68E-007 | Down | -0.71 | 0.5       |      | -5.5  | ##### | Down | Expressed protein                                 |
| Pc_TC121134 | -0.03 | 1     |      |  | 2.18  | 0.02      | Up   | 0.83  | 0.57      |      | 0.95  | 0.39  |      | Expressed protein                                 |
| Pc_TC121137 | 1.62  | 0.03  | Up   |  | 0     | 0         |      | 2.1   | 0.08      |      | 1.5   | 0.09  |      | beta-ketoacyl reductase 1                         |
| Pc_TC121140 | 0.79  | 0.46  |      |  | 0.25  | 0.89      |      | 2.88  | 0.02      | Up   | 0.63  | 0.6   |      | Expressed protein                                 |
| Pc_TC121160 | -4.13 | 0     | Down |  | 0.1   | 0.95      |      | -2.38 | 0.09      |      | -0.63 | 0.52  |      | Expressed protein                                 |
| Pc_TC121162 | 0.15  | 0.85  |      |  | 0.94  | 0.22      |      | 0     | 8.44E-005 |      | -5.33 | ##### | Down | Expressed protein                                 |
| Pc_TC121164 | 0.41  | 0.59  |      |  | 0.31  | 0.73      |      | -1.47 | 0.25      |      | -2.12 | 0.03  | Down | Expressed protein                                 |
| Pc_TC121169 | 1.56  | 0.02  | Up   |  | 0.26  | 0.79      |      | 0.85  | 0.47      |      | 0.25  | 0.8   |      | Expressed protein                                 |
| Pc_TC121187 | 0.74  | 0.36  |      |  | 0.98  | 0.28      |      | -2.77 | 0.07      |      | -2.65 | 0.03  | Down | Expressed protein                                 |
| Pc_TC121195 | 0.6   | 0.14  |      |  | -0.16 | 0.77      |      | 1.04  | 0.25      |      | 1.26  | 0.02  | Up   | Expressed protein                                 |
| Pc_TC121199 | 0.54  | 0.47  |      |  | 1.28  | 0.1       |      | -3.18 | 0.03      | Down | -1.54 | 0.11  |      | Expressed protein                                 |
| Pc_TC121209 | -0.28 | 0.76  |      |  | 0.02  | 1         |      | -4.27 | 0.01      | Down | -2.41 | 0.02  | Down | Expressed protein                                 |
| Pc_TC121236 | -0.76 | 0.28  |      |  | -1.78 | 0.04      | Down | 1.59  | 0.13      |      | 0.36  | 0.65  |      | Expressed protein                                 |
| Pc_TC121246 | 2.4   | 0.01  | Up   |  | 0     | 0.07      |      | 1.57  | 0.27      |      | -0.24 | 0.94  |      | Uncharacterized protein                           |
| Pc_TC121257 | -2.29 | 0.04  | Down |  | -1.31 | 0.24      |      | -2.64 | 0.08      |      | -1.63 | 0.13  |      | photosystem II reaction center protein A          |
| Pc_TC121265 | 0.82  | 0.63  |      |  | 2.52  | 0.04      | Up   | 0.83  | 0.68      |      | 0.36  | 0.91  |      | Ribosomal protein L24e family protein             |
| Pc_TC121306 | 0.21  | 0.84  |      |  | -0.77 | 0.47      |      | -0.91 | 0.5       |      | -2.37 | 0.04  | Down | Expressed protein                                 |
| Pc_TC121307 | 0.36  | 0.63  |      |  | -0.61 | 0.51      |      | -3    | 0.03      | Down | -1.4  | 0.13  |      | Expressed protein                                 |
| Pc_TC121332 | -0.92 | 0.39  |      |  | -0.07 | 1         |      | -1.5  | 0.31      |      | -2.64 | 0.04  | Down | Expressed protein                                 |
| Pc_TC121333 | 0.36  | 0.38  |      |  | 0.43  | 0.41      |      | -2.56 | 0.01      | Down | -2.13 | 0     | Down | Expressed protein                                 |
| Pc_TC121336 | -1.29 | 0.05  |      |  | -1.63 | 0.04      | Down | 1.84  | 0.07      |      | 0.67  | 0.34  |      | Expressed protein                                 |
| Pc_TC121344 | -0.88 | 0.34  |      |  | 0.42  | 0.66      |      | -1.82 | 0.19      |      | -2.33 | 0.04  | Down | Expressed protein                                 |
| Pc_TC121351 | 2.4   | 0.01  | Up   |  | 0     | 0.11      |      | 2.2   | 0.12      |      | 0.63  | 0.69  |      | 20S proteasome beta subunit D1                    |
| Pc_TC121358 | -0.12 | 0.75  |      |  | -0.22 | 0.62      |      | -2.51 | 0.01      | Down | -2.2  | 0     | Down | BRI1-KD interacting protein 118-like              |
| Pc_TC121360 | 0.6   | 0.47  |      |  | 1.93  | 0.06      | Up   | -2.08 | 0.15      |      | -0.76 | 0.47  |      | putative unclassified                             |
| Pc_TC121363 | 0.45  | 0.64  |      |  | 2.17  | 0.01      | Up   | -1.17 | 0.42      |      | -1.05 | 0.36  |      | ribosomal protein S13A                            |
| Pc_TC121366 | 0.41  | 0.55  |      |  | 0.34  | 0.68      |      | -3.73 | 0.01      | Down | -1.96 | 0.03  | Down | Expressed protein                                 |
| Pc_TC121367 | 0.08  | 0.95  |      |  | -0.49 | 0.62      |      | 2.53  | 0.02      | Up   | 1.56  | 0.05  | Up   | Expressed protein                                 |
| Pc_TC121373 | -5.35 | 0     | Down |  | 0     | 9.94E-005 |      | -1.46 | 0.26      |      | -5.8  | 0     | Down | Expressed protein                                 |
| Pc_TC121375 | -1.52 | 0.02  | Down |  | -1.61 | 0.04      | Down | 1.09  | 0.29      |      | 0.54  | 0.44  |      | Expressed protein                                 |
| Pc_TC121383 | -2.24 | 0.04  | Down |  | -1.68 | 0.15      |      | 1.73  | 0.14      |      | 1.14  | 0.19  |      | S-locus lectin protein kinase family protein      |
| Pc_TC121384 | 0.47  | 0.56  |      |  | 0.17  | 0.88      |      | -3.78 | 0.02      | Down | -0.96 | 0.32  |      | Expressed protein                                 |
| Pc_TC121398 | -0.7  | 0.37  |      |  | 0.8   | 0.31      |      | -3.47 | 0.01      | Down | -2.16 | 0.03  | Down | Expressed protein                                 |
| Pc_TC121409 | 0.49  | 0.76  |      |  | 2.25  | 0.04      | Up   | 0.14  | 1         |      | -0.37 | 0.87  |      | Chemosensory protein                              |
| Pc_TC121410 | 2.8   | 0     | Up   |  | 0     | 0.07      |      | 1.94  | 0.16      |      | 1.89  | 0.08  |      | Os02g0803200 protein                              |
| Pc_TC121437 | -2.31 | 0     | Down |  | -2.2  | 0.01      | Down | -0.75 | 0.5       |      | -1.21 | 0.13  |      | Expressed protein                                 |
| Pc_TC121438 | 0.24  | 0.73  |      |  | 0.42  | 0.59      |      | -1.42 | 0.23      |      | -1.73 | 0.05  | Down | Expressed protein                                 |
| Pc_TC121439 | 1.08  | 0.05  | Up   |  | 0.72  | 0.29      |      | 0.04  | 0.98      |      | 0     | 1     |      | Expressed protein                                 |

|             |       |       |      |       |           |      |       |           |      |       |       |      |                                                                       |     |
|-------------|-------|-------|------|-------|-----------|------|-------|-----------|------|-------|-------|------|-----------------------------------------------------------------------|-----|
| Pc_TC121452 | -2.28 | 0.02  | Down | -1.98 | 0.07      |      | -0.15 | 0.92      |      | -0.98 | 0.31  |      | Expressed protein                                                     |     |
| Pc_TC121457 | -0.83 | 0.38  |      | -2.94 | 0.02      | Down | 0.36  | 0.79      |      | 0.51  | 0.59  |      | SET-domain containing protein lysine methyltransferase family protein | SET |
| Pc_TC121462 | 0.29  | 0.68  |      | 0.35  | 0.67      |      | -3.87 | 0.01      | Down | -1.33 | 0.13  |      | Expressed protein                                                     |     |
| Pc_TC121491 | -4.06 | 0.19  |      | -0.54 | 0.55      |      | -2.22 | 0.09      |      | -2.78 | 0.01  | Down | Expressed protein                                                     |     |
| Pc_TC121507 | 1.55  | 0.04  | Up   | 0.66  | 0.5       |      | 0.3   | 0.83      |      | 0.94  | 0.3   |      | Expressed protein                                                     |     |
| Pc_TC121511 | 2.08  | 0.54  |      | 1.64  | 0.75      |      | 4.59  | 0.02      | Up   | 1.95  | 0.58  |      | Expressed protein                                                     |     |
| Pc_TC121512 | 0.27  | 0.95  |      | 0     | 0.15      |      | 3.44  | 0.01      | Up   | 1.14  | 0.41  |      | Leucine-rich repeat protein kinase family protein                     |     |
| Pc_TC121513 | -4.88 | 0     | Down | -3.9  | 0.01      | Down | 0.91  | 0.46      |      | -0.33 | 0.76  |      | Leucine-rich repeat protein kinase family protein                     |     |
| Pc_TC121515 | 3.66  | 0.06  |      | 1.06  | 0.98      |      | 6.69  | 9.91E-005 | Up   | 4.98  | 0     | Up   | Leucine-rich repeat protein kinase family protein                     |     |
| Pc_TC121516 | -0.89 | 0.09  |      | -2.7  | 0         | Down | 2.36  | 0.01      | Up   | 0.9   | 0.14  |      | EF-TU receptor                                                        |     |
| Pc_TC121517 | -0.83 | 0.22  |      | -1.74 | 0.04      | Down | 2.42  | 0.02      | Up   | 0.95  | 0.18  |      | Protein kinase family protein with leucine-rich repeat domain         |     |
| Pc_TC121518 | 0.69  | 0.49  |      | -0.86 | 0.54      |      | 4.52  | 0         | Up   | 2.4   | 0.01  | Up   | EF-TU receptor                                                        |     |
| Pc_TC121533 | -0.48 | 0.66  |      | -1.42 | 0.25      |      | 2.08  | 0.08      |      | 1.79  | 0.04  | Up   | putative Ty1-copia subclass                                           |     |
| Pc_TC121540 | 1.8   | 0     | Up   | 0     | 1.52E-005 |      | 1.63  | 0.14      |      | 0.42  | 0.61  |      | Ribosomal protein S5/Elongation factor G/III/V family protein         |     |
| Pc_TC121543 | -0.56 | 0.58  |      | -1.05 | 0.36      |      | -3.3  | 0.04      | Down | 0.07  | 0.98  |      | Expressed protein                                                     |     |
| Pc_TC121552 | -0.96 | 0.28  |      | -1.77 | 0.1       |      | 2.42  | 0.03      | Up   | 0.34  | 0.71  |      | MAP3K-like protein kinase                                             |     |
| Pc_TC121555 | -0.3  | 0.7   |      | 0.28  | 0.74      |      | -3.4  | 0.01      | Down | -2.28 | 0.02  | Down | Expressed protein                                                     |     |
| Pc_TC121566 | -2.35 | 0.04  | Down | -1.89 | 0.13      |      | -1.16 | 0.41      |      | -1.96 | 0.09  |      | Expressed protein                                                     |     |
| Pc_TC121576 | -1.17 | 0.16  |      | -0.13 | 0.91      |      | -5.14 | 0         | Down | -3.43 | 0     | Down | Expressed protein                                                     |     |
| Pc_TC121592 | 0     | 0     |      | -2.9  | 0.03      | Down | 0.36  | 0.79      |      | -2.01 | 0.07  |      | Expressed protein                                                     |     |
| Pc_TC121622 | 0.47  | 0.45  |      | 1.38  | 0.04      | Up   | -2.6  | 0.04      | Down | -1.17 | 0.15  |      | Tryptophan-rich antigen                                               |     |
| Pc_TC121623 | 4.25  | 0.01  | Up   | 0     | 1         |      | -0.5  | 1         |      | 1.63  | 0.71  |      | Expressed protein                                                     |     |
| Pc_TC121624 | 1.94  | 0.01  | Up   | 0     | 0         |      | -1.05 | 0.48      |      | 1.02  | 0.28  |      | RmlC-like cupins superfamily protein                                  |     |
| Pc_TC121637 | 1.6   | 0.01  | Up   | 0     | 1.02E-005 |      | 1.59  | 0.15      |      | -0.28 | 0.75  |      | Ribosomal protein L14p/L23e family protein                            |     |
| Pc_TC121648 | -1.57 | 0.03  | Down | -0.28 | 0.73      |      | -0.35 | 0.76      |      | -0.42 | 0.59  |      | Expressed protein                                                     |     |
| Pc_TC121665 | 1.68  | 0.02  | Up   | 1.03  | 0.26      |      | -2.44 | 0.11      |      | 0.36  | 0.73  |      | Expressed protein                                                     |     |
| Pc_TC121671 | 2.99  | 0     | Up   | 0.32  | 0.88      |      | -1.23 | 0.53      |      | 3.02  | 0     | Up   | Terpenoid cyclases/ Protein prenyltransferases superfamily protein    |     |
| Pc_TC121676 | 0.27  | 0.73  |      | 0.39  | 0.65      |      | -3.56 | 0.01      | Down | -2.43 | 0.02  | Down | Expressed protein                                                     |     |
| Pc_TC121678 | -1.83 | 0.09  |      | -0.6  | 0.59      |      | -1.7  | 0.23      |      | -4.28 | 0     | Down | Expressed protein                                                     |     |
| Pc_TC121680 | 2.24  | 0     | Up   | 0     | 0.01      |      | 1.57  | 0.22      |      | 0.12  | 0.96  |      | Expressed protein                                                     |     |
| Pc_TC121681 | 2.66  | 0.03  | Up   | 0     | 0.36      |      | 2.59  | 0.12      |      | 1.95  | 0.19  |      | NADH-ubiquinone oxidoreductase B8 subunit,putative                    |     |
| Pc_TC121691 | 2.53  | 0     | Up   | 0     | 0         |      | 2.01  | 0.1       |      | 0.17  | 0.91  |      | Expressed protein                                                     |     |
| Pc_TC121710 | -0.24 | 0.84  |      | -0.59 | 0.62      |      | -0.75 | 0.6       |      | -2.7  | 0.04  | Down | Expressed protein                                                     |     |
| Pc_TC121717 | -1.01 | 0.28  |      | 0.78  | 0.38      |      | -2.58 | 0.08      |      | -2.65 | 0.02  | Down | Expressed protein                                                     |     |
| Pc_TC121735 | 0.23  | 0.95  |      | 2.5   | 0.02      | Up   | -2.67 | 0.25      |      | -2.54 | 0.2   |      | Similar to CG5903                                                     |     |
| Pc_TC121738 | 2.4   | 0     | Up   | 0     | 0.02      |      | 1.83  | 0.15      |      | 0.27  | 0.85  |      | Expressed protein                                                     |     |
| Pc_TC121751 | 0.45  | 0.43  |      | 1.46  | 0.02      | Up   | -1.38 | 0.21      |      | -0.37 | 0.61  |      | Expressed protein                                                     |     |
| Pc_TC121768 | 0.86  | 0.21  |      | 0.85  | 0.28      |      | -5.22 | 0         | Down | -2.78 | 0.01  | Down | Expressed protein                                                     |     |
| Pc_TC121775 | 3.65  | ##### | Up   | 0     | 0.01      |      | 2.06  | 0.09      |      | 0.87  | 0.39  |      | Expressed protein                                                     |     |
| Pc_TC121794 | 1.47  | 0.2   |      | 2.23  | 0.05      | Up   | 1.15  | 0.48      |      | 1.87  | 0.1   |      | Expressed protein                                                     |     |
| Pc_TC121803 | 2.03  | 0     | Up   | 0     | 2.30E-005 |      | 1.1   | 0.33      |      | -0.13 | 0.9   |      | putative unclassified                                                 |     |
| Pc_TC121811 | 0.06  | 0.95  |      | 0.9   | 0.21      |      | -3.82 | 0         | Down | -1.79 | 0.04  | Down | Expressed protein                                                     |     |
| Pc_TC121832 | 1.08  | 0.57  |      | 0.38  | 0.97      |      | 2.09  | 0.24      |      | 2.67  | 0.04  | Up   | Expressed protein                                                     |     |
| Pc_TC121836 | 0.12  | 0.81  |      | 0.7   | 0.23      |      | -1.12 | 0.27      |      | -1.36 | 0.05  | Down | cysteine-rich RLK (RECEPTOR-like protein kinase) 8                    |     |
| Pc_TC121841 | 1.14  | 0.06  |      | 1.38  | 0.05      | Up   | -1.43 | 0.22      |      | 0.22  | 0.78  |      | Uncharacterized protein                                               |     |
| Pc_TC121852 | -0.27 | 0.71  |      | 0.69  | 0.35      |      | -2.62 | 0.04      | Down | -1.58 | 0.07  |      | Expressed protein                                                     |     |
| Pc_TC121859 | -0.55 | 0.67  |      | -0.12 | 0.98      |      | -0.34 | 0.85      |      | -3.46 | 0.03  | Down | Expressed protein                                                     |     |
| Pc_TC121881 | 0.84  | 0.05  |      | 0.82  | 0.13      |      | -2.52 | 0.02      | Down | -0.06 | 0.92  |      | Expressed protein                                                     |     |
| Pc_TC121900 | -0.71 | 0.46  |      | 0.39  | 0.7       |      | -3.87 | 0.02      | Down | -1.01 | 0.33  |      | copper/zinc superoxide dismutase 2                                    |     |
| Pc_TC121906 | -2.69 | 0.02  | Down | -0.17 | 0.89      |      | 0.22  | 0.88      |      | 1.18  | 0.16  |      | Expressed protein                                                     |     |
| Pc_TC121908 | -0.05 | 1     |      | 1.92  | 0.03      | Up   | 0.44  | 0.75      |      | -0.5  | 0.66  |      | Expressed protein                                                     |     |
| Pc_TC121909 | 0.65  | 0.37  |      | 2.21  | 0         | Up   | -0.38 | 0.77      |      | -1.29 | 0.17  |      | S18 ribosomal protein                                                 |     |
| Pc_TC121912 | 1.79  | 0     | Up   | 0     | 3.22E-006 |      | 1.5   | 0.16      |      | -0.07 | 0.95  |      | ATPase,V0/A0 complex,subunit C/D                                      |     |
| Pc_TC121917 | 1.36  | 0.04  | Up   | 1.43  | 0.07      |      | -5.96 | 0         | Down | -2.25 | 0.03  | Down | Expressed protein                                                     |     |
| Pc_TC121918 | 1.09  | 0.06  |      | 0.92  | 0.18      |      | -5.65 | 0         | Down | -2.42 | 0     | Down | Expressed protein                                                     |     |
| Pc_TC121919 | 1.01  | 0.08  |      | 2.38  | 0         | Up   | -5.58 | 0         | Down | -3.14 | 0     | Down | Expressed protein                                                     |     |
| Pc_TC121920 | 1.72  | 0.01  | Up   | 1.84  | 0.02      | Up   | 0     | 0         |      | 0.52  | 0.57  |      | Expressed protein                                                     |     |
| Pc_TC121942 | 0     | ##### |      | 0     | 0         |      | -4.71 | 0.01      | Down | 0     | ##### |      | Expressed protein                                                     |     |
| Pc_TC121944 | -0.53 | 0.26  |      | 0.49  | 0.37      |      | -1.43 | 0.15      |      | -1.31 | 0.04  | Down | Expressed protein                                                     |     |
| Pc_TC121988 | -0.74 | 0.5   |      | -1.14 | 0.36      |      | -0.63 | 0.67      |      | -2.9  | 0.03  | Down | Expressed protein                                                     |     |
| Pc_TC122007 | 0.11  | 0.83  |      | 0.42  | 0.47      |      | -2.54 | 0.02      | Down | -1.62 | 0.02  | Down | Expressed protein                                                     |     |
| Pc_TC122027 | 1.32  | 0.11  |      | 1.55  | 0.09      |      | -3.96 | 0.03      | Down | -1.25 | 0.29  |      | Expressed protein                                                     |     |

|             |       |       |      |  |       |      |      |       |           |      |       |       |      |                                                             |     |
|-------------|-------|-------|------|--|-------|------|------|-------|-----------|------|-------|-------|------|-------------------------------------------------------------|-----|
| Pc_TC122040 | -0.15 | 0.9   |      |  | -0.03 | 1    |      | -2.78 | 0.06      |      | -2.65 | 0.02  | Down | Expressed protein                                           |     |
| Pc_TC122041 | 0.55  | 0.59  |      |  | 1.14  | 0.26 |      | 2.37  | 0.05      |      | 2.13  | 0.02  | Up   | Expressed protein                                           |     |
| Pc_TC122052 | 0.72  | 0.36  |      |  | 0.26  | 0.81 |      | -3.26 | 0.03      | Down | -2    | 0.07  |      | Expressed protein                                           |     |
| Pc_TC122071 | 0.17  | 0.63  |      |  | 0.13  | 0.77 |      | -4.96 | 2.33E-006 | Down | -3.78 | ##### | Down | Expressed protein                                           |     |
| Pc_TC122080 | -0.48 | 0.62  |      |  | -0.73 | 0.51 |      | -1.54 | 0.27      |      | -4.33 | 0     | Down | Expressed protein                                           |     |
| Pc_TC122088 | 1.12  | 0.07  |      |  | 0.99  | 0.17 |      | -0.46 | 0.69      |      | 1.74  | 0.01  | Up   | Expressed protein                                           |     |
| Pc_TC122091 | 0.34  | 0.85  |      |  | 2.13  | 0.05 | Up   | 0.09  | 1         |      | 0.63  | 0.66  |      | Expressed protein                                           |     |
| Pc_TC122110 | 0.35  | 0.75  |      |  | 0.76  | 0.48 |      | 2.35  | 0.05      |      | 2.21  | 0.01  | Up   | Expressed protein                                           |     |
| Pc_TC122114 | 4.33  | 0.01  | Up   |  | 4.38  | 0.02 | Up   | 3.9   | 0.08      |      | 3.53  | 0.09  |      | Uncharacterized protein                                     |     |
| Pc_TC122115 | 0.45  | 0.57  |      |  | 0.81  | 0.34 |      | 1     | 0.39      |      | 1.59  | 0.04  | Up   | Expressed protein                                           |     |
| Pc_TC122132 | 2.08  | 0.01  | Up   |  | 0     | 0.02 |      | 1.48  | 0.27      |      | -0.37 | 0.81  |      | Expressed protein                                           |     |
| Pc_TC122141 | 1.03  | 0.15  |      |  | 0     | 0    |      | 2.9   | 0.01      | Up   | -0.56 | 0.56  |      | beta-ureidopropionase                                       |     |
| Pc_TC122152 | 2.95  | 0.03  | Up   |  | 0     | 0.48 |      | 0.5   | 0.95      |      | -0.37 | 1     |      | T-complex protein 1 alpha subunit                           |     |
| Pc_TC122155 | 1.49  | 0.25  |      |  | -0.2  | 1    |      | 2.78  | 0.06      |      | 2.4   | 0.04  | Up   | Expressed protein                                           |     |
| Pc_TC122165 | 0.44  | 0.33  |      |  | 0.52  | 0.36 |      | -3.34 | 0         | Down | -2.07 | 0     | Down | Protein phosphatase 2C family protein                       |     |
| Pc_TC122182 | -0.29 | 0.68  |      |  | 1.07  | 0.13 |      | -1.51 | 0.2       |      | -1.93 | 0.02  | Down | Expressed protein                                           |     |
| Pc_TC122186 | 0.05  | 0.96  |      |  | 0.52  | 0.47 |      | -3.41 | 0.01      | Down | -3.67 | 0     | Down | Expressed protein                                           |     |
| Pc_TC122198 | 1.08  | 0.97  |      |  | 1.64  | 0.75 |      | 6.35  | 0         | Up   | 5.46  | 0     | Up   | alpha/beta-Hydrolases superfamily protein                   |     |
| Pc_TC122199 | -1.08 | 0.12  |      |  | -0.65 | 0.41 |      | 2.88  | 0         | Up   | 1.24  | 0.08  |      | alpha/beta-Hydrolases superfamily protein                   |     |
| Pc_TC122210 | -0.21 | 0.81  |      |  | -0.06 | 0.97 |      | -3.82 | 0.01      | Down | -2.32 | 0.02  | Down | Expressed protein                                           |     |
| Pc_TC122212 | 1.73  | 0.02  | Up   |  | -0.45 | 0.7  |      | -2.25 | 0.14      |      | -2.54 | 0.04  | Down | Expressed protein                                           |     |
| Pc_TC122213 | 1.21  | 0.03  | Up   |  | 1.43  | 0.03 | Up   | -1.79 | 0.12      |      | -0.72 | 0.35  |      | Expressed protein                                           |     |
| Pc_TC122225 | -0.3  | 0.76  |      |  | 0.66  | 0.47 |      | -3.63 | 0.02      | Down | -1.04 | 0.3   |      | Expressed protein                                           |     |
| Pc_TC122235 | 4.03  | 0     | Up   |  | 0     | 0.67 |      | 3.09  | 0.11      |      | 2.43  | 0.19  |      | Expressed protein                                           |     |
| Pc_TC122237 | 1.86  | 0.03  | Up   |  | 0     | 0.02 |      | 1.98  | 0.13      |      | -0.37 | 0.81  |      | DA1-related protein 7                                       | LIM |
| Pc_TC122238 | -0.54 | 0.65  |      |  | -0.68 | 0.6  |      | -2.23 | 0.17      |      | -3.11 | 0.03  | Down | Expressed protein                                           |     |
| Pc_TC122260 | -3.29 | 0.01  | Down |  | -2.9  | 0.03 | Down | 0.87  | 0.48      |      | -0.81 | 0.44  |      | Expressed protein                                           |     |
| Pc_TC122270 | 2.7   | 0     | Up   |  | 0     | 0.02 |      | 2.48  | 0.05      |      | 2.07  | 0.03  | Up   | Expressed protein                                           |     |
| Pc_TC122289 | -0.08 | 0.92  |      |  | 0.54  | 0.46 |      | -5.34 | 0         | Down | -3.48 | 0     | Down | Expressed protein                                           |     |
| Pc_TC122298 | 0.29  | 0.48  |      |  | 0.81  | 0.11 |      | -2.95 | 0         | Down | -1.94 | 0     | Down | Expressed protein                                           |     |
| Pc_TC122300 | 0.26  | 0.77  |      |  | 0.68  | 0.44 |      | -4.71 | 0.01      | Down | -2    | 0.06  |      | Expressed protein                                           |     |
| Pc_TC122306 | 0.39  | 0.71  |      |  | 0.31  | 0.81 |      | -1.3  | 0.39      |      | -3.77 | 0.01  | Down | Expressed protein                                           |     |
| Pc_TC122307 | 0.6   | 0.11  |      |  | 0.87  | 0.06 |      | -3.39 | 0         | Down | -2.11 | 0     | Down | Expressed protein                                           |     |
| Pc_TC122315 | 1.02  | 0.16  |      |  | 0.7   | 0.42 |      | -3.46 | 0.02      | Down | -0.05 | 0.99  |      | Expressed protein                                           |     |
| Pc_TC122352 | -0.3  | 0.72  |      |  | 0.4   | 0.64 |      | -2.76 | 0.05      | Down | -2.96 | 0.01  | Down | Expressed protein                                           |     |
| Pc_TC122354 | 0.49  | 0.96  |      |  | 2.28  | 0.17 |      | 4.11  | 0.01      | Up   | 3.04  | 0.03  | Up   | Expressed protein                                           |     |
| Pc_TC122356 | -0.74 | 0.41  |      |  | -2.57 | 0.03 | Down | 0.1   | 0.96      |      | -0.88 | 0.37  |      | Expressed protein                                           |     |
| Pc_TC122380 | 3.99  | 0.03  | Up   |  | 0     | 1    |      | 3.83  | 0.09      |      | 0.63  | 1     |      | Uncharacterized protein                                     |     |
| Pc_TC122386 | 1.91  | 0.02  | Up   |  | 0     | 0.01 |      | 1.36  | 0.3       |      | 0.85  | 0.41  |      | Expressed protein                                           |     |
| Pc_TC122388 | -0.39 | 0.6   |      |  | 0.19  | 0.83 |      | -3.71 | 0.01      | Down | -3.08 | 0     | Down | Expressed protein                                           |     |
| Pc_TC122401 | -2.51 | 0.02  | Down |  | -1.3  | 0.22 |      | 1.78  | 0.12      |      | 0.36  | 0.7   |      | Expressed protein                                           |     |
| Pc_TC122417 | -0.7  | 0.31  |      |  | 0.34  | 0.66 |      | -3.51 | 0.01      | Down | -1.21 | 0.14  |      | Expressed protein                                           |     |
| Pc_TC122418 | -0.01 | 1     |      |  | 2.04  | 0.03 | Up   | -1.58 | 0.33      |      | -0.07 | 1     |      | Expressed protein                                           |     |
| Pc_TC122445 | -0.1  | 0.94  |      |  | -0.27 | 0.79 |      | -0.79 | 0.54      |      | -2.25 | 0.03  | Down | Expressed protein                                           |     |
| Pc_TC122451 | 4.47  | 0.01  | Up   |  | 4.96  | 0    | Up   | 3.59  | 0.13      |      | 4.53  | 0.01  | Up   | Expressed protein                                           |     |
| Pc_TC122456 | -0.6  | 0.53  |      |  | -0.04 | 1    |      | -4.5  | 0.01      | Down | -2.05 | 0.07  |      | Expressed protein                                           |     |
| Pc_TC122500 | 1.94  | 0.04  | Up   |  | 0     | 0.05 |      | 2.89  | 0.03      | Up   | -0.03 | 1     |      | acyl-CoA oxidase 5                                          |     |
| Pc_TC122502 | 0.38  | 0.35  |      |  | 0.36  | 0.48 |      | -3.21 | 0         | Down | -2.51 | ##### | Down | Expressed protein                                           |     |
| Pc_TC122539 | 1.43  | 0.16  |      |  | 0.77  | 0.57 |      | 1.17  | 0.43      |      | 2.23  | 0.03  | Up   | Expressed protein                                           |     |
| Pc_TC122570 | 0.23  | 0.77  |      |  | -0.02 | 1    |      | -2.67 | 0.05      | Down | -1.61 | 0.08  |      | Expressed protein                                           |     |
| Pc_TC122586 | 4.58  | ##### | Up   |  | 0     | 0.11 |      | -0.5  | 0.85      |      | 0     | 0.06  |      | OSINBa0011L07.17 protein                                    |     |
| Pc_TC122595 | -1.81 | 0.01  | Down |  | -0.32 | 0.67 |      | -2.52 | 0.03      | Down | -1.91 | 0.02  | Down | NB-ARC domain-containing disease resistance protein         |     |
| Pc_TC122629 | -2.13 | 0.01  | Down |  | -3.53 | 0    | Down | 1.52  | 0.16      |      | 0.46  | 0.57  |      | Expressed protein                                           |     |
| Pc_TC122636 | -0.74 | 0.5   |      |  | -1.88 | 0.15 |      | -1.02 | 0.49      |      | -2.9  | 0.03  | Down | Expressed protein                                           |     |
| Pc_TC122638 | 0.41  | 0.26  |      |  | 0.67  | 0.15 |      | -2.69 | 0.01      | Down | -0.85 | 0.13  |      | Leucine-rich repeat protein kinase family protein           |     |
| Pc_TC122639 | -1.8  | 0.08  |      |  | -2.66 | 0.03 | Down | 2.25  | 0.05      | Up   | -1.17 | 0.26  |      | Expressed protein                                           |     |
| Pc_TC122647 | -3.17 | 0.04  | Down |  | -1.02 | 0.45 |      | -1.42 | 0.37      |      | -4.62 | 0.01  | Down | Expressed protein                                           |     |
| Pc_TC122652 | -0.56 | 0.48  |      |  | 0.24  | 0.79 |      | -2.64 | 0.05      | Down | -1.3  | 0.16  |      | Protein kinase protein with tetratricopeptide repeat domain |     |
| Pc_TC122663 | 0.51  | 0.57  |      |  | 1.03  | 0.27 |      | 2.37  | 0.04      | Up   | 1.09  | 0.23  |      | Expressed protein                                           |     |
| Pc_TC122667 | -3.73 | 0.05  | Down |  | -1.16 | 0.45 |      | -0.98 | 0.57      |      | 0     | 0.01  |      | Expressed protein                                           |     |
| Pc_TC122672 | -0.16 | 0.89  |      |  | -0.99 | 0.36 |      | -4.54 | 0.01      | Down | -3.1  | 0.01  | Down | Uncharacterized protein                                     |     |
| Pc_TC122674 | 1.08  | 0.35  |      |  | 2.46  | 0.02 | Up   | 0.35  | 0.87      |      | 2.03  | 0.05  |      | Expressed protein                                           |     |

|             |       |      |      |  |       |           |      |      |       |      |      |      |       |       |                   |                                                       |      |
|-------------|-------|------|------|--|-------|-----------|------|------|-------|------|------|------|-------|-------|-------------------|-------------------------------------------------------|------|
| Pc_TC122676 | -0.96 | 0.11 |      |  | -2.29 | 0         | Down | 0.46 | 0.66  |      |      | 0.18 | 0.8   |       | Expressed protein |                                                       |      |
| Pc_TC122682 | 1.39  | 0.04 | Up   |  | 0.63  | 0.46      |      |      | 0.45  | 0.71 |      |      | 0.22  | 0.82  |                   | Expressed protein                                     |      |
| Pc_TC122699 | 0.37  | 0.72 |      |  | -0.94 | 0.45      |      |      | 2.9   | 0.01 | Up   |      | 2.02  | 0.02  | Up                | Expressed protein                                     |      |
| Pc_TC122701 | 3.89  | 0.04 | Up   |  | 0.06  | 1         |      |      | 3.41  | 0.17 |      |      | 3.08  | 0.18  |                   | Os01g0171200 protein                                  |      |
| Pc_TC122728 | 1.27  | 0.1  |      |  | 1.13  | 0.21      |      |      | -3.3  | 0.04 | Down |      | 1.4   | 0.1   |                   | Expressed protein                                     |      |
| Pc_TC122741 | 0.36  | 0.68 |      |  | 0.34  | 0.74      |      |      | 0     | 0    |      |      | -2.79 | 0.02  | Down              | Uncharacterized protein                               |      |
| Pc_TC122743 | 0     | 0    |      |  | 0     | 0.01      |      |      | -4.89 | 0.02 | Down |      | 0     | 0     |                   | Expressed protein                                     |      |
| Pc_TC122746 | 0.26  | 0.79 |      |  | 0.54  | 0.58      |      |      | -3.4  | 0.03 | Down |      | -2.28 | 0.05  | Down              | Expressed protein                                     |      |
| Pc_TC122762 | 0.49  | 0.6  |      |  | 1.06  | 0.26      |      |      | -1.76 | 0.24 |      |      | -2.64 | 0.04  | Down              | Expressed protein                                     |      |
| Pc_TC122766 | -1.08 | 0.1  |      |  | -0.22 | 0.77      |      |      | 2.15  | 0.03 | Up   |      | 1.21  | 0.08  |                   | Expressed protein                                     |      |
| Pc_TC122806 | 0.82  | 0.29 |      |  | 1.1   | 0.2       |      |      | -3.22 | 0.04 | Down |      | -2.1  | 0.06  |                   | Expressed protein                                     |      |
| Pc_TC122815 | 0     | 0.01 |      |  | -3.94 | 0.05      | Down |      | -2.91 | 0.12 |      |      | -3.37 | 0.04  | Down              | Expressed protein                                     |      |
| Pc_TC122838 | 0.18  | 0.78 |      |  | 0.59  | 0.39      |      |      | -3.97 | 0    | Down |      | -1.92 | 0.02  | Down              | Expressed protein                                     |      |
| Pc_TC122844 | 0.73  | 0.37 |      |  | 2.17  | 0.01      | Up   |      | -2.82 | 0.07 |      |      | -0.24 | 0.84  |                   | Uncharacterized protein                               |      |
| Pc_TC122871 | -3.24 | 0.03 | Down |  | -0.46 | 0.74      |      |      | -0.82 | 0.59 |      |      | -0.89 | 0.46  |                   | Expressed protein                                     |      |
| Pc_TC122872 | -0.84 | 0.17 |      |  | -0.77 | 0.28      |      |      | -2.73 | 0.02 | Down |      | -0.66 | 0.37  |                   | Expressed protein                                     |      |
| Pc_TC122879 | -2.61 | 0.01 | Down |  | -0.35 | 0.72      |      |      | 0.18  | 0.89 |      |      | -0.54 | 0.56  |                   | Expressed protein                                     |      |
| Pc_TC122889 | -1.11 | 0.4  |      |  | -0.24 | 0.9       |      |      | -3.5  | 0.08 |      |      | -3.37 | 0.04  | Down              | Expressed protein                                     |      |
| Pc_TC122911 | -0.24 | 0.9  |      |  | -1.26 | 0.4       |      |      | 1.12  | 0.42 |      |      | 1.97  | 0.04  | Up                | Expressed protein                                     |      |
| Pc_TC122924 | -3.62 | 0.01 | Down |  | -1.83 | 0.14      |      |      | -2.2  | 0.15 |      |      | -3.08 | 0.02  | Down              | ABC transporter family C protein ABCC2                |      |
| Pc_TC122932 | -2.22 | 0    | Down |  | -1.86 | 0.02      | Down |      | -2.62 | 0.03 | Down |      | -1.55 | 0.05  |                   | Plant protein of unknown function (DUF863)            |      |
| Pc_TC122933 | 1.57  | 0.01 | Up   |  | 0.62  | 0.45      |      |      | 1.99  | 0.07 |      |      | 1.4   | 0.07  |                   | Plant protein of unknown function (DUF863)            |      |
| Pc_TC122972 | -2.09 | 0.03 | Down |  | -0.58 | 0.55      |      |      | -0.9  | 0.48 |      |      | -0.58 | 0.53  |                   | Expressed protein                                     |      |
| Pc_TC122974 | -0.59 | 0.57 |      |  | -0.7  | 0.54      |      |      | 2.61  | 0.02 | Up   |      | 2     | 0.02  | Up                | Protein HASTY 1                                       |      |
| Pc_TC122981 | 0.57  | 0.33 |      |  | 0.58  | 0.41      |      |      | -2.67 | 0.03 | Down |      | -1.91 | 0.02  | Down              | OSJNba0093F12.13 protein                              |      |
| Pc_TC122986 | -1.51 | 0.54 |      |  | 1.47  | 0.31      |      |      | 3.86  | 0    | Up   |      | 2.82  | 0.01  | Up                | Expressed protein                                     |      |
| Pc_TC123005 | -1.34 | 0.12 |      |  | -3.94 | 0         | Down |      | 0.87  | 0.45 |      |      | -0.41 | 0.66  |                   | Putative uncharacterized protein                      |      |
| Pc_TC123007 | -0.99 | 0.39 |      |  | 0.19  | 0.9       |      |      | -4.89 | 0.02 | Down |      | -0.6  | 0.62  |                   | Expressed protein                                     |      |
| Pc_TC123013 | 0.91  | 0.47 |      |  | 2.17  | 0.05      | Up   |      | -0.5  | 0.84 |      |      | -3.54 | 0.11  |                   | Expressed protein                                     |      |
| Pc_TC123015 | 1.66  | 0.04 | Up   |  | 0.54  | 0.63      |      |      | 0.35  | 0.82 |      |      | 0.11  | 0.96  |                   | Expressed protein                                     |      |
| Pc_TC123023 | 2.83  | 0.02 | Up   |  | 0     | 0.36      |      |      | 2.9   | 0.07 |      |      | 2.71  | 0.04  | Up                | Expressed protein                                     |      |
| Pc_TC123026 | -0.07 | 0.91 |      |  | 0.1   | 0.88      |      |      | -1.82 | 0.09 |      |      | -1.51 | 0.04  | Down              | Expressed protein                                     |      |
| Pc_TC123038 | -1.6  | 0.11 |      |  | 0.06  | 0.99      |      |      | -3.17 | 0.04 | Down |      | -0.29 | 0.79  |                   | Expressed protein                                     |      |
| Pc_TC123044 | 2.35  | 0.01 | Up   |  | 0     | 0.05      |      |      | 1     | 0.51 |      |      | -0.13 | 0.99  |                   | Expressed protein                                     |      |
| Pc_TC123053 | 1.69  | 0.03 | Up   |  | 0     | 0.01      |      |      | 1.3   | 0.3  |      |      | -0.12 | 0.95  |                   | ARM repeat superfamily protein                        |      |
| Pc_TC123054 | -0.27 | 0.89 |      |  | 1.61  | 0.12      |      |      | 1.58  | 0.24 |      |      | 2.21  | 0.02  | Up                | Expressed protein                                     |      |
| Pc_TC123066 | 1.89  | 0.03 | Up   |  | 2.42  | 0.01      | Up   |      | 0.4   | 0.82 |      |      | 1.99  | 0.04  | Up                | putative Ty1-copia subclass                           |      |
| Pc_TC123073 | 0.63  | 0.45 |      |  | 2.61  | 0         | Up   |      | -0.7  | 0.61 |      |      | -0.19 | 0.87  |                   | Ribosomal L27e protein family                         |      |
| Pc_TC123074 | 3.01  | 0    | Up   |  | 0     | 0.11      |      |      | 1.9   | 0.2  |      |      | -0.57 | 0.79  |                   | Acyl-CoA N-acyltransferases (NAT) superfamily protein | GNAT |
| Pc_TC123076 | -4.01 | 0    | Down |  | 0     | 0         |      |      | 0     | 0    |      |      | 0     | ##### |                   | Expressed protein                                     |      |
| Pc_TC123082 | 0.2   | 0.87 |      |  | 0.96  | 0.33      |      |      | 0     | 0.01 |      |      | -2.83 | 0.04  | Down              | Expressed protein                                     |      |
| Pc_TC123085 | 0.03  | 1    |      |  | 0.13  | 0.89      |      |      | -3.69 | 0.01 | Down |      | -0.95 | 0.29  |                   | Expressed protein                                     |      |
| Pc_TC123098 | -0.17 | 0.87 |      |  | 0.42  | 0.65      |      |      | -3.74 | 0.02 | Down |      | -2.62 | 0.02  | Down              | Expressed protein                                     |      |
| Pc_TC123099 | 1.64  | 0.02 | Up   |  | -5.19 | 0         | Down |      | 1.09  | 0.35 |      |      | -1.04 | 0.29  |                   | actin 7                                               |      |
| Pc_TC123100 | 0.69  | 0.46 |      |  | 1.84  | 0.04      | Up   |      | -0.25 | 0.89 |      |      | 0.32  | 0.79  |                   | Expressed protein                                     |      |
| Pc_TC123122 | -0.09 | 0.93 |      |  | 0.23  | 0.8       |      |      | 0     | 0    |      |      | -2.04 | 0.03  | Down              | Expressed protein                                     |      |
| Pc_TC123123 | 1.16  | 0.19 |      |  | 2.41  | 0.01      | Up   |      | -2.34 | 0.17 |      |      | -0.96 | 0.45  |                   | Expressed protein                                     |      |
| Pc_TC123125 | 0.53  | 0.53 |      |  | 0.88  | 0.33      |      |      | -5.4  | 0.01 | Down |      | -2.7  | 0.03  | Down              | Expressed protein                                     |      |
| Pc_TC123134 | -0.51 | 0.72 |      |  | 0.4   | 0.78      |      |      | 0     | 0.02 |      |      | -4.28 | 0.02  | Down              | Expressed protein                                     |      |
| Pc_TC123136 | 0.82  | 0.54 |      |  | 2.28  | 0.04      | Up   |      | -0.34 | 0.9  |      |      | 0.26  | 0.92  |                   | Expressed protein                                     |      |
| Pc_TC123147 | -3.09 | 0.17 |      |  | -3.11 | 0.2       |      |      | 2.89  | 0.03 | Up   |      | -0.22 | 0.96  |                   | Expressed protein                                     |      |
| Pc_TC123153 | 0.35  | 0.61 |      |  | 0.45  | 0.57      |      |      | -0.63 | 0.59 |      |      | -2.29 | 0.01  | Down              | Expressed protein                                     |      |
| Pc_TC123157 | -0.01 | 0.99 |      |  | -1.78 | 0.01      | Down |      | 0.58  | 0.54 |      |      | -0.12 | 0.85  |                   | Expressed protein                                     |      |
| Pc_TC123158 | -1.91 | 0    | Down |  | 0.13  | 0.82      |      |      | -0.07 | 0.95 |      |      | -0.2  | 0.75  |                   | Expressed protein                                     |      |
| Pc_TC123171 | -1.47 | 0.01 | Down |  | -0.75 | 0.23      |      |      | 1.06  | 0.27 |      |      | 0.28  | 0.66  |                   | Os12g0577001 protein                                  |      |
| Pc_TC123176 | -1.92 | 0.17 |      |  | -2.36 | 0.15      |      |      | -1.5  | 0.37 |      |      | -3.37 | 0.04  | Down              | Expressed protein                                     |      |
| Pc_TC123185 | 1.78  | 0    | Up   |  | 0     | 6.53E-009 |      |      | 1.32  | 0.2  |      |      | -0.2  | 0.79  |                   | ATPase,V1 complex,subunit B protein                   |      |
| Pc_TC123212 | 0.08  | 0.97 |      |  | -0.94 | 0.41      |      |      | 2.41  | 0.04 | Up   |      | 1.23  | 0.16  |                   | Expressed protein                                     |      |
| Pc_TC123218 | 3.08  | 0.05 | Up   |  | 0     | 0.67      |      |      | 3.2   | 0.09 |      |      | 0.63  | 0.96  |                   | Expressed protein                                     |      |
| Pc_TC123228 | 2.61  | 0.02 | Up   |  | 0     | 0.27      |      |      | 2.77  | 0.07 |      |      | 0.47  | 0.87  |                   | Expressed protein                                     |      |
| Pc_TC123235 | 0.66  | 0.41 |      |  | 0.76  | 0.4       |      |      | -0.74 | 0.58 |      |      | 2.01  | 0.01  | Up                | Expressed protein                                     |      |
| Pc_TC123261 | -1.95 | 0.02 | Down |  | -0.42 | 0.64      |      |      | 0.78  | 0.49 |      |      | 0.35  | 0.68  |                   | Expressed protein                                     |      |

|             |       |      |      |       |           |      |  |       |           |      |       |       |      |                                                                        |      |
|-------------|-------|------|------|-------|-----------|------|--|-------|-----------|------|-------|-------|------|------------------------------------------------------------------------|------|
| Pc_TC123274 | -4.38 | 0.01 | Down | -1.59 | 0.22      |      |  | -3.37 | 0.05      |      | -4.83 | 0     | Down | Expressed protein                                                      |      |
| Pc_TC123276 | 0.79  | 0.17 |      | 0.98  | 0.14      |      |  | -3.7  | 0         | Down | -1.64 | 0.04  | Down | Expressed protein                                                      |      |
| Pc_TC123284 | -2.55 | 0    | Down | -4.03 | 1.70E-005 | Down |  | 2.31  | 0.02      | Up   | 0.21  | 0.77  |      | Expressed protein                                                      |      |
| Pc_TC123289 | 0.4   | 0.58 |      | 0.43  | 0.6       |      |  | -2.52 | 0.06      |      | -2.51 | 0.01  | Down | Expressed protein                                                      |      |
| Pc_TC123307 | -0.29 | 0.82 |      | 1.18  | 0.21      |      |  | 0     | 0.01      |      | -3.83 | 0.01  | Down | Expressed protein                                                      |      |
| Pc_TC123312 | 0.32  | 0.37 |      | 0.35  | 0.45      |      |  | -1.82 | 0.05      | Down | -1.1  | 0.05  | Down | Expressed protein                                                      |      |
| Pc_TC123321 | 0.75  | 0.1  |      | 0.85  | 0.13      |      |  | -4.68 | 0         | Down | -1.97 | 0     | Down | Uncharacterized protein                                                |      |
| Pc_TC123322 | 2.51  | 0    | Up   | 0     | 0.01      |      |  | 2.36  | 0.05      |      | 0.36  | 0.77  |      | Expressed protein                                                      |      |
| Pc_TC123327 | -3.17 | 0.04 | Down | -0.49 | 0.72      |      |  | -2.74 | 0.11      |      | -1.62 | 0.21  |      | Expressed protein                                                      |      |
| Pc_TC123351 | -4.24 | 0.01 | Down | -1.26 | 0.34      |      |  | 0     | 0.01      |      | -3.7  | 0.02  | Down | Expressed protein                                                      |      |
| Pc_TC123353 | 1.23  | 0.02 | Up   | 0     | 1.25E-009 |      |  | 1.46  | 0.15      |      | -0.32 | 0.66  |      | aminopeptidase M1                                                      |      |
| Pc_TC123356 | 0.26  | 0.49 |      | 1.02  | 0.03      | Up   |  | -2.84 | 0         | Down | -2.38 | ##### | Down | Expressed protein                                                      |      |
| Pc_TC123372 | 0.64  | 0.19 |      | 1.25  | 0.03      | Up   |  | -0.87 | 0.4       |      | -0.08 | 0.9   |      | Expressed protein                                                      |      |
| Pc_TC123383 | -2.73 | 0    | Down | -1.49 | 0.1       |      |  | -3.17 | 0.02      | Down | -3.04 | 0     | Down | Chlorophyll A-B binding family protein                                 |      |
| Pc_TC123398 | -0.83 | 0.27 |      | -2.13 | 0.03      | Down |  | -0.17 | 0.89      |      | 0.23  | 0.79  |      | Expressed protein                                                      |      |
| Pc_TC123407 | 1.75  | 0.01 | Up   | 0     | 0         |      |  | 0.75  | 0.54      |      | -0.79 | 0.44  |      | Expressed protein                                                      | TRAF |
| Pc_TC123408 | 0.71  | 0.57 |      | 2.09  | 0.05      | Up   |  | 1.17  | 0.43      |      | 0.34  | 0.84  |      | wall-associated kinase 2                                               |      |
| Pc_TC123443 | 0.63  | 0.47 |      | 0.78  | 0.42      |      |  | -1.74 | 0.24      |      | -2.49 | 0.04  | Down | Expressed protein                                                      |      |
| Pc_TC123453 | -0.01 | 0.99 |      | 0.49  | 0.4       |      |  | -2.36 | 0.03      | Down | -1.85 | 0.01  | Down | Expressed protein                                                      |      |
| Pc_TC123458 | 0.5   | 0.5  |      | 1.27  | 0.1       |      |  | -3.24 | 0.02      | Down | -1.54 | 0.11  |      | Uncharacterized protein                                                |      |
| Pc_TC123459 | -0.45 | 0.69 |      | -0.07 | 0.99      |      |  | -4.02 | 0.03      | Down | -1.9  | 0.12  |      | Expressed protein                                                      |      |
| Pc_TC123460 | -2.86 | 0.03 | Down | -1.66 | 0.2       |      |  | -1.56 | 0.3       |      | -3.31 | 0.02  | Down | Putative uncharacterized protein                                       |      |
| Pc_TC123461 | 0.15  | 0.7  |      | 0.23  | 0.64      |      |  | -1.71 | 0.07      |      | -1.46 | 0.01  | Down | Expressed protein                                                      |      |
| Pc_TC123463 | -0.81 | 0.37 |      | -2.83 | 0.02      | Down |  | 0.89  | 0.45      |      | -1    | 0.31  |      | Expressed protein                                                      |      |
| Pc_TC123473 | 2.86  | 0    | Up   | 0     | 0.01      |      |  | 1.29  | 0.32      |      | -0.54 | 0.67  |      | Expressed protein                                                      |      |
| Pc_TC123487 | 0.23  | 0.95 |      | -0.11 | 1         |      |  | 2.67  | 0.05      | Up   | 1.26  | 0.3   |      | Expressed protein                                                      |      |
| Pc_TC123489 | 2.11  | 0    | Up   | 0     | 0         |      |  | 1.75  | 0.14      |      | 0.21  | 0.86  |      | Translation elongation factor EF1B/ribosomal protein S6 family protein |      |
| Pc_TC123494 | 0.54  | 0.63 |      | -3.94 | 0.05      | Down |  | 0.9   | 0.52      |      | -1.79 | 0.2   |      | Expressed protein                                                      |      |
| Pc_TC123504 | 2.74  | 0.05 | Up   | 0     | 0.48      |      |  | 1.38  | 0.56      |      | 1.63  | 0.38  |      | Expressed protein                                                      |      |
| Pc_TC123515 | 4.08  | 0.02 | Up   | 2.06  | 0.59      |      |  | 3.31  | 0.19      |      | 2.21  | 0.47  |      | Uncharacterized protein                                                |      |
| Pc_TC123521 | -0.17 | 0.87 |      | -1.02 | 0.32      |      |  | -3.74 | 0.02      | Down | -2.04 | 0.05  |      | Expressed protein                                                      |      |
| Pc_TC123526 | 0.67  | 0.17 |      | 1.38  | 0.02      | Up   |  | -1.41 | 0.18      |      | -0.32 | 0.64  |      | Expressed protein                                                      |      |
| Pc_TC123557 | -0.01 | 0.99 |      | 0.24  | 0.69      |      |  | -2.19 | 0.04      | Down | -0.76 | 0.24  |      | Expressed protein                                                      |      |
| Pc_TC123560 | 2.17  | 0.01 | Up   | 0     | 0.04      |      |  | 1.5   | 0.28      |      | -0.64 | 0.68  |      | Expressed protein                                                      |      |
| Pc_TC123569 | 0.15  | 0.93 |      | 0.38  | 0.76      |      |  | -4.82 | 0.02      | Down | -3.7  | 0.02  | Down | Expressed protein                                                      |      |
| Pc_TC123575 | 0.1   | 0.9  |      | 0.67  | 0.35      |      |  | -2.77 | 0.03      | Down | -1.77 | 0.04  | Down | Expressed protein                                                      |      |
| Pc_TC123582 | -0.11 | 0.91 |      | 1.09  | 0.17      |      |  | -4.08 | 0.01      | Down | -2.26 | 0.02  | Down | Expressed protein                                                      |      |
| Pc_TC123592 | -1.55 | 0.04 | Down | -0.66 | 0.43      |      |  | 0.11  | 0.93      |      | -1.54 | 0.07  |      | Expressed protein                                                      |      |
| Pc_TC123602 | 1.04  | 0.03 | Up   | 0.86  | 0.15      |      |  | -1.83 | 0.09      |      | -0.18 | 0.79  |      | Expressed protein                                                      |      |
| Pc_TC123610 | 0.49  | 0.67 |      | 1.96  | 0.04      | Up   |  | -1.6  | 0.35      |      | -3.28 | 0.05  |      | Expressed protein                                                      |      |
| Pc_TC123611 | 0.56  | 0.33 |      | 0.6   | 0.38      |      |  | 0     | 2.45E-006 |      | -3.77 | ##### | Down | Expressed protein                                                      |      |
| Pc_TC123615 | -0.42 | 0.67 |      | 1.69  | 0.04      | Up   |  | -2.45 | 0.1       |      | -0.28 | 0.8   |      | Os08g0398800 protein                                                   |      |
| Pc_TC123618 | 0.14  | 0.86 |      | 0.53  | 0.49      |      |  | 0.38  | 0.74      |      | 1.58  | 0.03  | Up   | P0028E10.12 protein                                                    |      |
| Pc_TC123627 | 0.77  | 0.49 |      | 1.53  | 0.15      |      |  | 1.29  | 0.35      |      | 2.05  | 0.04  | Up   | vacuolar iron transporter 1                                            |      |
| Pc_TC123644 | -0.88 | 0.32 |      | -0.91 | 0.37      |      |  | -0.14 | 0.93      |      | -3.66 | 0     | Down | Expressed protein                                                      |      |
| Pc_TC123645 | -1.2  | 0.15 |      | -2.03 | 0.05      | Down |  | 2.27  | 0.04      | Up   | 0.88  | 0.27  |      | putative Ty1-copia subclass                                            |      |
| Pc_TC123683 | 0.29  | 0.73 |      | 0.83  | 0.33      |      |  | -3.74 | 0.02      | Down | -3.04 | 0.01  | Down | Expressed protein                                                      |      |
| Pc_TC123685 | -2.38 | 0.03 | Down | -0.23 | 0.85      |      |  | 0.19  | 0.9       |      | 0.28  | 0.78  |      | Expressed protein                                                      |      |
| Pc_TC123708 | -0.24 | 0.84 |      | 0.91  | 0.34      |      |  | -3.56 | 0.04      | Down | -0.11 | 0.95  |      | Expressed protein                                                      |      |
| Pc_TC123715 | 0.99  | 0.17 |      | 0.71  | 0.41      |      |  | 0     | 0         |      | -2.7  | 0.01  | Down | Expressed protein                                                      |      |
| Pc_TC123728 | -0.46 | 0.65 |      | -0.8  | 0.47      |      |  | -2.18 | 0.14      |      | -3.23 | 0.01  | Down | Expressed protein                                                      |      |
| Pc_TC123749 | -3.73 | 0.05 | Down | -2.75 | 0.13      |      |  | 1.37  | 0.32      |      | -0.28 | 0.88  |      | Chaperone/heat shock protein Hsp12,putative                            |      |
| Pc_TC123765 | 1.08  | 0.31 |      | 0.87  | 0.49      |      |  | 2.88  | 0.02      | Up   | 2.23  | 0.02  | Up   | Expressed protein                                                      |      |
| Pc_TC123766 | -0.43 | 0.55 |      | 0.13  | 0.88      |      |  | -2.18 | 0.08      |      | -2.34 | 0.01  | Down | Expressed protein                                                      |      |
| Pc_TC123767 | -0.13 | 0.93 |      | 1.11  | 0.21      |      |  | -3.4  | 0.03      | Down | -1.96 | 0.08  |      | Expressed protein                                                      |      |
| Pc_TC123801 | 0.31  | 0.52 |      | 0.44  | 0.45      |      |  | -3.75 | 0         | Down | -1.41 | 0.04  | Down | Expressed protein                                                      |      |
| Pc_TC123807 | 1.58  | 0.03 | Up   | 1.4   | 0.09      |      |  | 0.42  | 0.75      |      | 0.15  | 0.9   |      | binding                                                                |      |
| Pc_TC123808 | -1.8  | 0.02 | Down | 0.72  | 0.34      |      |  | -1.72 | 0.16      |      | -1.46 | 0.09  |      | binding                                                                |      |
| Pc_TC123823 | 0.3   | 0.47 |      | 0.54  | 0.29      |      |  | -2.38 | 0.02      | Down | -1.32 | 0.03  | Down | Expressed protein                                                      |      |
| Pc_TC123839 | 1.19  | 0.02 | Up   | 0     | 1.25E-009 |      |  | 0.76  | 0.46      |      | -0.1  | 0.89  |      | Expressed protein                                                      |      |
| Pc_TC123898 | 0.51  | 0.48 |      | 0.99  | 0.21      |      |  | -3.58 | 0.01      | Down | -0.62 | 0.49  |      | Expressed protein                                                      |      |
| Pc_TC123929 | 0.84  | 0.24 |      | 2.72  | 0         | Up   |  | -1.75 | 0.18      |      | -0.59 | 0.53  |      | Expressed protein                                                      |      |

|             |       |      |      |       |           |      |       |           |      |       |       |      |                                                         |     |
|-------------|-------|------|------|-------|-----------|------|-------|-----------|------|-------|-------|------|---------------------------------------------------------|-----|
| Pc_TC123942 | 0.05  | 0.97 |      | 0.51  | 0.53      |      | -2.7  | 0.04      | Down | -0.7  | 0.42  |      | alpha/beta-Hydrolases superfamily protein               |     |
| Pc_TC123949 | 1.26  | 0.1  |      | 3.17  | 2.61E-005 | Up   | -2.35 | 0.12      |      | -0.37 | 0.73  |      | Expressed protein                                       |     |
| Pc_TC123957 | 0.08  | 1    |      | 2.06  | 0.36      |      | 3.9   | 0.03      | Up   | 2.21  | 0.26  |      | Expressed protein                                       |     |
| Pc_TC123960 | -1.55 | 0.13 |      | -2.57 | 0.04      | Down | 0.19  | 0.9       |      | -0.42 | 0.69  |      | Expressed protein                                       |     |
| Pc_TC123966 | -0.38 | 0.75 |      | 0.73  | 0.48      |      | -1.5  | 0.32      |      | -4.83 | 0     | Down | Expressed protein                                       |     |
| Pc_TC123981 | -2.24 | 0.03 | Down | -2.26 | 0.05      |      | -0.04 | 1         |      | -2.18 | 0.05  | Down | Expressed protein                                       |     |
| Pc_TC124003 | 0.12  | 0.86 |      | -0.05 | 0.96      |      | -1.87 | 0.11      |      | -1.83 | 0.03  | Down | Expressed protein                                       |     |
| Pc_TC124016 | 0.31  | 0.63 |      | 0.91  | 0.19      |      | -2.67 | 0.03      | Down | -1.37 | 0.09  |      | Expressed protein                                       |     |
| Pc_TC124019 | -1.65 | 0.04 | Down | -0.46 | 0.6       |      | 1.04  | 0.34      |      | 0.16  | 0.86  |      | ARM repeat superfamily protein                          |     |
| Pc_TC124023 | 0.22  | 0.87 |      | 0.57  | 0.62      |      | -3.16 | 0.08      |      | -3.04 | 0.04  | Down | Expressed protein                                       |     |
| Pc_TC124056 | -1.71 | 0.06 |      | -0.01 | 1         |      | -2.08 | 0.12      |      | -2.17 | 0.03  | Down | Expressed protein                                       |     |
| Pc_TC124105 | 3.25  | 0.01 | Up   | 0     | 0.48      |      | 1.09  | 0.69      |      | 0.85  | 0.76  |      | Expressed protein                                       |     |
| Pc_TC124109 | 1.09  | 0.07 |      | 0.57  | 0.44      |      | -3.32 | 0.01      | Down | 0.68  | 0.36  |      | Expressed protein                                       |     |
| Pc_TC124110 | -3.09 | 0.04 | Down | -1.53 | 0.28      |      | -0.14 | 0.96      |      | -1.22 | 0.34  |      | P0482D04.23 protein                                     |     |
| Pc_TC124115 | -0.63 | 0.61 |      | -0.41 | 0.78      |      | -2.67 | 0.13      |      | -2.96 | 0.05  | Down | Expressed protein                                       |     |
| Pc_TC124117 | -1.11 | 0.4  |      | -0.94 | 0.52      |      | -0.69 | 0.68      |      | -4.37 | 0.02  | Down | Expressed protein                                       |     |
| Pc_TC124124 | -1.66 | 0.11 |      | -3.85 | 0.01      | Down | -1.23 | 0.37      |      | -1.37 | 0.2   |      | Expressed protein                                       |     |
| Pc_TC124135 | 1.43  | 0.2  |      | 1.7   | 0.15      |      | 1.86  | 0.2       |      | 2.31  | 0.03  | Up   | Expressed protein                                       |     |
| Pc_TC124146 | -2.92 | 0.07 |      | -1.36 | 0.36      |      | -0.41 | 0.82      |      | -3.37 | 0.04  | Down | Expressed protein                                       |     |
| Pc_TC124148 | -0.35 | 0.64 |      | 1.26  | 0.08      |      | -4.96 | 0         | Down | -2.42 | 0.01  | Down | Expressed protein                                       |     |
| Pc_TC124149 | -0.77 | 0.53 |      | -0.65 | 0.64      |      | 2.72  | 0.02      | Up   | 1.88  | 0.04  | Up   | Os08g0487300 protein                                    |     |
| Pc_TC124155 | 1.42  | 0.06 |      | 2.31  | 0         | Up   | 0.23  | 0.88      |      | 0.54  | 0.58  |      | Expressed protein                                       |     |
| Pc_TC124161 | 0.83  | 0.18 |      | 1.5   | 0.03      | Up   | -3.94 | 0         | Down | -2.1  | 0.02  | Down | Expressed protein                                       |     |
| Pc_TC124166 | 1.08  | 0.22 |      | 2.67  | 0         | Up   | -0.01 | 1         |      | 0.21  | 0.88  |      | Expressed protein                                       |     |
| Pc_TC124167 | -0.51 | 0.89 |      | 0     | 0.2       |      | 3.07  | 0.03      | Up   | 1.36  | 0.33  |      | Expressed protein                                       |     |
| Pc_TC124194 | -0.63 | 0.22 |      | -1.31 | 0.04      | Down | 2.1   | 0.02      | Up   | 0.74  | 0.22  |      | Uncharacterized protein                                 |     |
| Pc_TC124203 | -0.32 | 0.63 |      | -0.23 | 0.77      |      | -2.13 | 0.07      |      | -2.15 | 0.01  | Down | Expressed protein                                       |     |
| Pc_TC124205 | 2.06  | 0.01 | Up   | 0     | 0.02      |      | 1.73  | 0.18      |      | 0.67  | 0.55  |      | fumarase 1                                              |     |
| Pc_TC124252 | -0.17 | 0.83 |      | 0.46  | 0.56      |      | -2.21 | 0.08      |      | -2.24 | 0.02  | Down | Expressed protein                                       |     |
| Pc_TC124256 | -2.73 | 0.05 | Down | -0.33 | 0.81      |      | -0.57 | 0.71      |      | -0.45 | 0.72  |      | Expressed protein                                       |     |
| Pc_TC124263 | -2.58 | 0.01 | Down | -0.55 | 0.59      |      | 0.26  | 0.85      |      | -1.04 | 0.29  |      | Expressed protein                                       |     |
| Pc_TC124271 | 0.17  | 0.6  |      | 0.42  | 0.32      |      | -2.12 | 0.02      | Down | -1.34 | 0.01  | Down | Tetratricopeptide repeat (TPR)-like superfamily protein | TPR |
| Pc_TC124272 | -0.09 | 0.82 |      | 0.71  | 0.13      |      | -5.53 | 9.57E-007 | Down | -3.39 | ##### | Down | Tetratricopeptide repeat (TPR)-like superfamily protein | TPR |
| Pc_TC124274 | 0.07  | 0.86 |      | 0.68  | 0.13      |      | -4    | 8.22E-005 | Down | -3.18 | ##### | Down | Tetratricopeptide repeat (TPR)-like superfamily protein | TPR |
| Pc_TC124278 | 0.63  | 0.4  |      | 0.46  | 0.61      |      | 0     | 0         |      | -3.73 | 0     | Down | Expressed protein                                       |     |
| Pc_TC124280 | 0.49  | 0.34 |      | 0.61  | 0.31      |      | -3.82 | 0         | Down | -0.27 | 0.69  |      | Tetratricopeptide repeat (TPR)-like superfamily protein | TPR |
| Pc_TC124281 | 0.22  | 0.48 |      | 0.5   | 0.21      |      | -2.06 | 0.02      | Down | -1.13 | 0.03  | Down | Tetratricopeptide repeat (TPR)-like superfamily protein | TPR |
| Pc_TC124287 | -0.58 | 0.55 |      | 0.44  | 0.66      |      | -2.6  | 0.09      |      | -2.7  | 0.03  | Down | Expressed protein                                       |     |
| Pc_TC124306 | 0.22  | 0.87 |      | 0.72  | 0.51      |      | 0     | 0.01      |      | -3.62 | 0.02  | Down | Expressed protein                                       |     |
| Pc_TC124317 | -0.08 | 0.88 |      | 0.54  | 0.35      |      | -2.14 | 0.04      | Down | -1.18 | 0.08  |      | Expressed protein                                       |     |
| Pc_TC124324 | 1.3   | 0.05 |      | 1.59  | 0.04      | Up   | -2.99 | 0.04      | Down | 0.22  | 0.82  |      | Expressed protein                                       |     |
| Pc_TC124330 | -1.63 | 0.02 | Down | -0.7  | 0.37      |      | 1.9   | 0.07      |      | 0.99  | 0.16  |      | Expressed protein                                       |     |
| Pc_TC124346 | 2.48  | 0.02 | Up   | 0.57  | 0.77      |      | 2.25  | 0.13      |      | 3.42  | 0     | Up   | Expressed protein                                       |     |
| Pc_TC124361 | 1.22  | 0.16 |      | -0.87 | 0.51      |      | 3.28  | 0.01      | Up   | -0.37 | 0.78  |      | Expressed protein                                       |     |
| Pc_TC124363 | 0.48  | 0.31 |      | 1.04  | 0.06      |      | -2.66 | 0.01      | Down | 0.05  | 0.94  |      | Expressed protein                                       |     |
| Pc_TC124374 | 0.61  | 0.25 |      | 0.58  | 0.37      |      | -3.54 | 0         | Down | -2.15 | 0     | Down | Uncharacterized protein                                 |     |
| Pc_TC124389 | 0.35  | 0.33 |      | -0.55 | 0.25      |      | -2.63 | 0.01      | Down | -0.93 | 0.09  |      | ADP glucose pyrophosphorylase large subunit 1           |     |
| Pc_TC124438 | 1.43  | 0.09 |      | 2.06  | 0.02      | Up   | -0.58 | 0.72      |      | -0.74 | 0.56  |      | Ribosomal L27e protein family                           |     |
| Pc_TC124440 | 0.41  | 0.64 |      | 0.39  | 0.7       |      | -2.28 | 0.12      |      | -3.33 | 0.01  | Down | Expressed protein                                       |     |
| Pc_TC124444 | -0.07 | 0.9  |      | 0.9   | 0.12      |      | -2.52 | 0.02      | Down | -1.46 | 0.04  | Down | T-complex protein 11                                    |     |
| Pc_TC124463 | 0.24  | 0.78 |      | 0.06  | 0.98      |      | -3.89 | 0.01      | Down | -1.52 | 0.12  |      | Expressed protein                                       |     |
| Pc_TC124480 | 2.62  | 0.01 | Up   | 0     | 0.2       |      | 0.73  | 0.73      |      | -0.37 | 0.93  |      | Ribosomal protein L7Ae/L30e/S12e/Gadd45 family protein  |     |
| Pc_TC124488 | -0.3  | 0.88 |      | -0.83 | 0.61      |      | 2.93  | 0.02      | Up   | 1.54  | 0.14  |      | Expressed protein                                       |     |
| Pc_TC124492 | 0.32  | 0.39 |      | 0.33  | 0.48      |      | -1.68 | 0.07      |      | -1.12 | 0.05  | Down | Expressed protein                                       |     |
| Pc_TC124520 | 1.36  | 0.01 | Up   | 1.41  | 0.03      | Up   | -1.97 | 0.09      |      | 0.09  | 0.91  |      | Expressed protein                                       |     |
| Pc_TC124529 | -0.06 | 0.94 |      | 0.62  | 0.36      |      | -2.42 | 0.04      | Down | -2.62 | 0     | Down | Expressed protein                                       |     |
| Pc_TC124538 | -0.45 | 0.37 |      | 0.56  | 0.33      |      | -4.01 | 0         | Down | -2.94 | ##### | Down | Expressed protein                                       |     |
| Pc_TC124539 | 0.34  | 0.43 |      | 0.5   | 0.34      |      | -5.98 | 1.51E-006 | Down | -3.27 | ##### | Down | Expressed protein                                       |     |
| Pc_TC124540 | 0.83  | 0.02 |      | 0.84  | 0.07      |      | -3.9  | 0         | Down | -1.7  | 0     | Down | Putative polyprotein                                    |     |
| Pc_TC124544 | 4.4   | 0.01 | Up   | 0     | 1         |      | 2.31  | 0.48      |      | 0.63  | 1     |      | Expressed protein                                       |     |
| Pc_TC124552 | -4.24 | 0.01 | Down | 0     | 0.01      |      | 0     | 0.01      |      | 0     | 0     |      | Expressed protein                                       |     |
| Pc_TC124553 | -0.92 | 0.46 |      | -0.65 | 0.64      |      | -4.67 | 0.03      | Down | -1.22 | 0.34  |      | Expressed protein                                       |     |

|             |       |       |      |  |       |           |      |  |           |      |      |       |       |      |                                                                             |
|-------------|-------|-------|------|--|-------|-----------|------|--|-----------|------|------|-------|-------|------|-----------------------------------------------------------------------------|
| Pc_TC124572 | -0.92 | 0.14  |      |  | -1.12 | 0.13      |      |  | -3.19     | 0.01 | Down | -0.79 | 0.29  |      | Expressed protein                                                           |
| Pc_TC124576 | 0.44  | 0.53  |      |  | 0.37  | 0.66      |      |  | -2.92     | 0.03 | Down | -1.61 | 0.08  |      | Uncharacterized protein                                                     |
| Pc_TC124578 | 0.5   | 0.39  |      |  | 0.85  | 0.2       |      |  | -4.95     | 0    | Down | -1.76 | 0.02  | Down | Expressed protein                                                           |
| Pc_TC124583 | -0.8  | 0.48  |      |  | -1.08 | 0.39      |      |  | -1.63     | 0.28 |      | -3.25 | 0.02  | Down | Expressed protein                                                           |
| Pc_TC124595 | -2.78 | 0.02  | Down |  | -0.8  | 0.47      |      |  | -5.35     | 0.01 | Down | -0.06 | 0.98  |      | Expressed protein                                                           |
| Pc_TC124614 | -0.46 | 0.6   |      |  | -0.87 | 0.38      |      |  | -1.57     | 0.23 |      | -2.18 | 0.04  | Down | Expressed protein                                                           |
| Pc_TC124619 | 3.18  | ##### | Up   |  | 0     | 2.00E-005 |      |  | 2.31      | 0.03 | Up   | -0.96 | 0.28  |      | Expressed protein                                                           |
| Pc_TC124666 | 1.27  | 0.03  | Up   |  | 0.85  | 0.24      |      |  | -3.7      | 0.01 | Down | -0.6  | 0.46  |      | Expressed protein                                                           |
| Pc_TC124671 | 0.44  | 0.41  |      |  | 0.42  | 0.51      |      |  | -2.64     | 0.02 | Down | -0.7  | 0.32  |      | Expressed protein                                                           |
| Pc_TC124685 | -1.66 | 0.18  |      |  | -0.36 | 0.8       |      |  | 0         | 0.01 |      | -3.7  | 0.02  | Down | Expressed protein                                                           |
| Pc_TC124698 | 2.34  | 0     | Up   |  | -3.59 | 0         | Down |  | 3.11      | 0    | Up   | 1.01  | 0.2   |      | Expressed protein                                                           |
| Pc_TC124704 | 1.63  | 0.01  | Up   |  | 0.87  | 0.28      |      |  | 0.03      | 1    |      | 0.21  | 0.82  |      | Putative uncharacterized protein                                            |
| Pc_TC124706 | 1.46  | 0.03  | Up   |  | 0.57  | 0.51      |      |  | -0.13     | 0.93 |      | 0.32  | 0.72  |      | Expressed protein                                                           |
| Pc_TC124712 | -0.07 | 0.95  |      |  | -0.17 | 0.86      |      |  | -2.73     | 0.04 | Down | -0.91 | 0.29  |      | Putative polyprotein                                                        |
| Pc_TC124726 | 0.61  | 0.35  |      |  | 1.34  | 0.06      |      |  | 5.13E-005 |      |      | -4.48 | ##### | Down | Expressed protein                                                           |
| Pc_TC124754 | 3.06  | ##### | Up   |  | 0     | 0         |      |  | 2.57      | 0.03 | Up   | 0.07  | 0.98  |      | Expressed protein                                                           |
| Pc_TC124787 | -0.25 | 0.6   |      |  | -0.05 | 0.93      |      |  | -2.66     | 0.01 | Down | -1.66 | 0.01  | Down | putative unclassified                                                       |
| Pc_TC124794 | 1.61  | 0.03  | Up   |  | 0     | 0         |      |  | 1.79      | 0.13 |      | -0.28 | 0.81  |      | Expressed protein                                                           |
| Pc_TC124805 | -0.34 | 0.83  |      |  | -0.36 | 0.83      |      |  | 3.1       | 0.01 | Up   | 2.03  | 0.03  | Up   | Expressed protein                                                           |
| Pc_TC124809 | 1.72  | 0.04  | Up   |  | 1.06  | 0.32      |      |  | 0         | 0.01 |      | -1.37 | 0.31  |      | Expressed protein                                                           |
| Pc_TC124825 | -1.07 | 0.28  |      |  | -2.57 | 0.04      | Down |  | 2.85      | 0.01 | Up   | 1.36  | 0.11  |      | Expressed protein                                                           |
| Pc_TC124835 | 1.48  | 0.03  | Up   |  | 0.96  | 0.23      |      |  | -0.1      | 0.95 |      | 1.68  | 0.03  | Up   | Expressed protein                                                           |
| Pc_TC124849 | 0     | 0.44  |      |  | 0     | 0.48      |      |  | 3.78      | 0.02 | Up   | 0     | 0.35  |      | Expressed protein                                                           |
| Pc_TC124852 | -1.12 | 0.01  | Down |  | -1.37 | 0.01      | Down |  | 0.32      | 0.72 |      | -0.01 | 0.99  |      | gag protein                                                                 |
| Pc_TC124859 | 0.29  | 0.42  |      |  | 1.39  | 0         | Up   |  | -3.49     | 0    | Down | -0.91 | 0.1   |      | Expressed protein                                                           |
| Pc_TC124884 | -3.88 | 0     | Down |  | -4.9  | 0         | Down |  | -0.93     | 0.5  |      | -3.33 | 0.01  | Down | Expressed protein                                                           |
| Pc_TC124918 | 0.27  | 0.78  |      |  | -0.05 | 1         |      |  | -3.72     | 0.03 | Down | -1.72 | 0.13  |      | FKBP-like peptidyl-prolyl cis-trans isomerase family protein                |
| Pc_TC124930 | 0.29  | 0.81  |      |  | -4.19 | 0.03      | Down |  | 2.24      | 0.07 |      | 0.8   | 0.43  |      | Uncharacterized protein                                                     |
| Pc_TC124933 | -1.13 | 0.17  |      |  | -0.81 | 0.38      |      |  | -2.17     | 0.1  |      | -2.24 | 0.02  | Down | Expressed protein                                                           |
| Pc_TC124939 | -0.71 | 0.26  |      |  | -1.83 | 0.02      | Down |  | 1.17      | 0.25 |      | 0.22  | 0.76  |      | mitogen-activated protein kinase kinase kinase 9                            |
| Pc_TC124949 | -0.84 | 0.26  |      |  | -1.16 | 0.18      |      |  | 2.45      | 0.02 | Up   | 0.89  | 0.24  |      | Expressed protein                                                           |
| Pc_TC124973 | 1.29  | 0.08  |      |  | 0.99  | 0.27      |      |  | 2.37      | 0.04 | Up   | 0.82  | 0.36  |      | Plastid-lipid associated protein PAP / fibrillin family protein             |
| Pc_TC124980 | 0.49  | 0.45  |      |  | 0.82  | 0.26      |      |  | -2.78     | 0.03 | Down | -1.41 | 0.1   |      | Expressed protein                                                           |
| Pc_TC124995 | 1.94  | 0.07  |      |  | 0.06  | 1         |      |  | 2.73      | 0.05 | Up   | 1.58  | 0.19  |      | Expressed protein                                                           |
| Pc_TC124998 | 0.4   | 0.74  |      |  | 1.01  | 0.35      |      |  | -4.5      | 0.04 | Down | -0.92 | 0.49  |      | Expressed protein                                                           |
| Pc_TC125000 | -1.03 | 0.31  |      |  | -0.58 | 0.61      |      |  | -2.98     | 0.06 |      | -2.6  | 0.03  | Down | Expressed protein                                                           |
| Pc_TC125011 | 0.56  | 0.52  |      |  | 1.91  | 0.02      | Up   |  | -0.55     | 0.7  |      | -0.79 | 0.46  |      | Ribosomal protein L1p/L10e family                                           |
| Pc_TC125018 | -0.92 | 0.24  |      |  | -1.36 | 0.15      |      |  | -2.6      | 0.05 | Down | -1.14 | 0.2   |      | Expressed protein                                                           |
| Pc_TC125034 | 0.79  | 0.37  |      |  | -0.49 | 0.7       |      |  | 1.37      | 0.27 |      | 2.54  | 0     | Up   | Expressed protein                                                           |
| Pc_TC125035 | 0.54  | 0.37  |      |  | -0.19 | 0.81      |      |  | -3.6      | 0.01 | Down | -1.78 | 0.03  | Down | Expressed protein                                                           |
| Pc_TC125049 | -1.61 | 0.04  | Down |  | -1.24 | 0.15      |      |  | -0.58     | 0.62 |      | -0.36 | 0.67  |      | Expressed protein                                                           |
| Pc_TC125057 | -0.27 | 0.79  |      |  | 0.41  | 0.68      |      |  | -4.54     | 0.01 | Down | -1.83 | 0.09  |      | Expressed protein                                                           |
| Pc_TC125061 | -2.03 | 0.03  | Down |  | -0.72 | 0.46      |      |  | 1.52      | 0.18 |      | -0.16 | 0.88  |      | Protein of unknown function (DUF3414)                                       |
| Pc_TC125067 | 3.66  | 0.01  | Up   |  | 0     | 0.67      |      |  | 1.83      | 0.47 |      | -0.37 | 1     |      | Expressed protein                                                           |
| Pc_TC125068 | 1.89  | 0.04  | Up   |  | 0     | 0.04      |      |  | 2.78      | 0.03 | Up   | -0.15 | 0.97  |      | gamma interferon responsive lysosomal thiol (GILT) reductase family protein |
| Pc_TC125080 | 0     | 1     |      |  | 0.83  | 0.29      |      |  | -3.47     | 0.01 | Down | -1.76 | 0.06  |      | Expressed protein                                                           |
| Pc_TC125083 | 0.92  | 0.25  |      |  | -3.75 | 0.01      | Down |  | -2.98     | 0.06 |      | 0.55  | 0.57  |      | Expressed protein                                                           |
| Pc_TC125100 | 0.33  | 0.62  |      |  | 0.5   | 0.5       |      |  | -3.01     | 0.02 | Down | -1.02 | 0.21  |      | Expressed protein                                                           |
| Pc_TC125165 | 4.01  | ##### | Up   |  | 0     | 0.04      |      |  | 2.52      | 0.05 |      | 1.74  | 0.09  |      | Expressed protein                                                           |
| Pc_TC125167 | -1.78 | 0.03  | Down |  | -3.05 | 0         | Down |  | -0.2      | 0.87 |      | -1.48 | 0.09  |      | Expressed protein                                                           |
| Pc_TC125169 | 3.4   | 0.1   |      |  | 4.76  | 0.01      | Up   |  | 0         | 0.87 |      | 3.8   | 0.05  |      | Expressed protein                                                           |
| Pc_TC125170 | -0.92 | 0.48  |      |  | -1.94 | 0.21      |      |  | 0         | 0.01 |      | -3.37 | 0.04  | Down | Expressed protein                                                           |
| Pc_TC125177 | -0.02 | 1     |      |  | 2.08  | 0.03      | Up   |  | 0         | 0.02 |      | -2.28 | 0.13  |      | Expressed protein                                                           |
| Pc_TC125180 | -3.31 | 0.02  | Down |  | -2.01 | 0.15      |      |  | -0.89     | 0.56 |      | 0.52  | 0.63  |      | Expressed protein                                                           |
| Pc_TC125192 | -0.32 | 0.73  |      |  | 0.78  | 0.37      |      |  | -1.54     | 0.25 |      | -2.41 | 0.03  | Down | Expressed protein                                                           |
| Pc_TC125194 | 0.48  | 0.59  |      |  | 2.2   | 0.01      | Up   |  | -3.3      | 0.04 | Down | -2.6  | 0.03  | Down | Expressed protein                                                           |
| Pc_TC125200 | 1.54  | 0.03  | Up   |  | 1.19  | 0.15      |      |  | -0.27     | 0.84 |      | 0.56  | 0.53  |      | Expressed protein                                                           |
| Pc_TC125203 | 0.82  | 0.47  |      |  | 2.03  | 0.05      | Up   |  | 1.01      | 0.5  |      | 2.25  | 0.02  | Up   | Expressed protein                                                           |
| Pc_TC125209 | -0.08 | 0.94  |      |  | 0.94  | 0.22      |      |  | -3.38     | 0.01 | Down | -1.94 | 0.04  | Down | ubiquitin-protein ligase 4                                                  |
| Pc_TC125210 | 0.25  | 0.66  |      |  | 1.11  | 0.08      |      |  | -2.76     | 0.02 | Down | -2.15 | 0.01  | Down | ubiquitin-protein ligase 4                                                  |
| Pc_TC125221 | 0.63  | 0.32  |      |  | 1.15  | 0.11      |      |  | -4.44     | 0    | Down | -1.78 | 0.04  | Down | Expressed protein                                                           |
| Pc_TC125222 | 0.62  | 0.38  |      |  | 1.03  | 0.19      |      |  | -3.14     | 0.03 | Down | -1.11 | 0.23  |      | Expressed protein                                                           |



|             |       |       |      |       |           |      |       |           |      |       |       |      |                                                   |       |
|-------------|-------|-------|------|-------|-----------|------|-------|-----------|------|-------|-------|------|---------------------------------------------------|-------|
| Pc_TC125237 | -0.59 | 0.57  |      | 0.3   | 0.79      |      | -3.25 | 0.05      | Down | -3.13 | 0.02  | Down | Expressed protein                                 |       |
| Pc_TC125242 | 1.96  | 0     | Up   | 0     | 0         |      | 2.9   | 0.01      | Up   | -0.12 | 0.91  |      | Phosphoribosyltransferase family protein          |       |
| Pc_TC125254 | 0.54  | 0.49  |      | 0.35  | 0.71      |      | -2.5  | 0.08      |      | -2.7  | 0.01  | Down | Expressed protein                                 |       |
| Pc_TC125256 | -1.02 | 0.45  |      | -0.85 | 0.57      |      | -1.82 | 0.3       |      | -4.28 | 0.02  | Down | Expressed protein                                 |       |
| Pc_TC125277 | -0.51 | 0.67  |      | 0.19  | 0.9       |      | -1.72 | 0.27      |      | -3.77 | 0.01  | Down | Expressed protein                                 |       |
| Pc_TC125284 | 1.69  | 0.01  | Up   | 0     | 6.86E-006 |      | 1.07  | 0.33      |      | -0.71 | 0.41  |      | Ribosomal protein S4                              |       |
| Pc_TC125293 | -1.06 | 0.35  |      | -3.4  | 0.03      | Down | -1.96 | 0.21      |      | -1.83 | 0.14  |      | Expressed protein                                 |       |
| Pc_TC125300 | 0.97  | 0.02  |      | 1.19  | 0.02      | Up   | -3.62 | 0         | Down | -1.47 | 0.02  | Down | Expressed protein                                 |       |
| Pc_TC125303 | 0.02  | 1     |      | -0.78 | 0.51      |      | 2.36  | 0.04      | Up   | 1.07  | 0.24  |      | Expressed protein                                 |       |
| Pc_TC125307 | 0     | ##### |      | -5.99 | 2.43E-005 | Down | -5.54 | 0         | Down | -6.42 | ##### | Down | Expressed protein                                 |       |
| Pc_TC125308 | 1.12  | 0.12  |      | 1.89  | 0.02      | Up   | -2.38 | 0.09      |      | 0.32  | 0.73  |      | Expressed protein                                 |       |
| Pc_TC125325 | 2.02  | 0.03  | Up   | 0     | 0.04      |      | 1.41  | 0.32      |      | 1.08  | 0.34  |      | Expressed protein                                 |       |
| Pc_TC125336 | -0.34 | 0.65  |      | 0.61  | 0.43      |      | -2.17 | 0.08      |      | -1.8  | 0.05  | Down | Expressed protein                                 |       |
| Pc_TC125339 | -2.11 | 0.05  | Down | -2.36 | 0.05      |      | 1.48  | 0.21      |      | -0.62 | 0.55  |      | Expressed protein                                 |       |
| Pc_TC125340 | 3.5   | ##### | Up   | 0     | 0.01      |      | 2.01  | 0.1       |      | -0.01 | 1     |      | heat shock protein 81-2                           |       |
| Pc_TC125354 | 2.13  | 0.01  | Up   | 0     | 0.01      |      | 2.33  | 0.05      |      | -0.37 | 0.77  |      | Expressed protein                                 |       |
| Pc_TC125363 | -1.09 | 0.38  |      | -0.2  | 0.92      |      | 3.05  | 0.01      | Up   | 1.21  | 0.22  |      | autoinhibited Ca(2+)-ATPase 9                     |       |
| Pc_TC125367 | 0.41  | 0.6   |      | 0.93  | 0.26      |      | -3.3  | 0.03      | Down | -3.18 | 0.01  | Down | Putative uncharacterized protein                  |       |
| Pc_TC125379 | 0.24  | 0.69  |      | 0.64  | 0.34      |      | -2.28 | 0.05      | Down | -1.97 | 0.01  | Down | Expressed protein                                 |       |
| Pc_TC125392 | -0.03 | 1     |      | -1.36 | 0.19      |      | -3.82 | 0.01      | Down | -2.53 | 0.02  | Down | WPP domain-interacting protein 1                  |       |
| Pc_TC125403 | 1.6   | 0.01  | Up   | 0     | 4.05E-005 |      | 0.84  | 0.46      |      | 0.03  | 0.99  |      | UDP-glucose pyrophosphorylase 2                   |       |
| Pc_TC125410 | 0.07  | 0.87  |      | 0.14  | 0.79      |      | -2.03 | 0.04      | Down | -0.88 | 0.15  |      | Expressed protein                                 |       |
| Pc_TC125413 | -0.76 | 0.47  |      | -0.5  | 0.68      |      | 2.92  | 0.01      | Up   | 1.58  | 0.07  |      | Expressed protein                                 |       |
| Pc_TC125421 | -0.39 | 0.59  |      | 0.92  | 0.21      |      | -2.35 | 0.06      |      | -3.16 | 0     | Down | Expressed protein                                 |       |
| Pc_TC125430 | -3.92 | 0.03  | Down | -1.13 | 0.44      |      | 0.41  | 0.8       |      | 0.38  | 0.77  |      | Expressed protein                                 |       |
| Pc_TC125431 | -0.35 | 0.59  |      | -0.89 | 0.25      |      | -3.25 | 0.01      | Down | -2.74 | 0     | Down | Expressed protein                                 |       |
| Pc_TC125433 | -0.6  | 0.66  |      | 1.99  | 0.04      | Up   | -0.59 | 0.73      |      | -0.29 | 0.86  |      | Ribosomal L38e protein family                     |       |
| Pc_TC125439 | -0.47 | 0.52  |      | 0.66  | 0.38      |      | -2.52 | 0.05      | Down | -3.11 | 0     | Down | Expressed protein                                 |       |
| Pc_TC125450 | 3.06  | ##### | Up   | 0     | 0         |      | 1.57  | 0.2       |      | -0.08 | 0.98  |      | Expressed protein                                 |       |
| Pc_TC125455 | 0.03  | 0.99  |      | 0.57  | 0.44      |      | 0     | 1.68E-005 |      | -3.82 | 0     | Down | Uncharacterized protein                           |       |
| Pc_TC125462 | 0.4   | 0.2   |      | 0.58  | 0.14      |      | -7.84 | 5.03E-012 | Down | -2.62 | ##### | Down | Expressed protein                                 |       |
| Pc_TC125489 | 0.4   | 0.74  |      | -0.77 | 0.6       |      | -0.8  | 0.63      |      | -4.37 | 0.02  | Down | Expressed protein                                 |       |
| Pc_TC125507 | -3.73 | 0.05  | Down | -3.75 | 0.07      |      | 0.09  | 1         |      | -0.37 | 0.81  |      | Expressed protein                                 |       |
| Pc_TC125527 | 0.72  | 0.41  |      | 2.68  | 0         | Up   | 0.23  | 0.89      |      | 0.39  | 0.72  |      | Expressed protein                                 |       |
| Pc_TC125530 | -0.01 | 1     |      | 0.96  | 0.19      |      | -3.3  | 0.01      | Down | -3.04 | 0     | Down | Expressed protein                                 |       |
| Pc_TC125548 | -1.17 | 0.34  |      | 0.06  | 1         |      | 0     | 0.01      |      | -3.04 | 0.04  | Down | Expressed protein                                 |       |
| Pc_TC125558 | 0.59  | 0.32  |      | 0.62  | 0.37      |      | -3.18 | 0.01      | Down | -1.28 | 0.1   |      | Expressed protein                                 |       |
| Pc_TC125577 | 3.17  | ##### | Up   | 0     | 6.30E-005 |      | 3.62  | 0         | Up   | 0.82  | 0.32  |      | Serine protease inhibitor (SERPIN) family protein |       |
| Pc_TC125590 | -1.42 | 0.28  |      | -1.71 | 0.25      |      | 3.63  | 0         | Up   | 0.79  | 0.46  |      | Expressed protein                                 |       |
| Pc_TC125612 | 0     | 0     |      | 0     | 0         |      | -3.3  | 0.04      | Down | 0     | 0     |      | Histone superfamily protein                       | CCAAT |
| Pc_TC125617 | -0.09 | 0.92  |      | 0.1   | 0.92      |      | -1.83 | 0.14      |      | -1.96 | 0.03  | Down | Expressed protein                                 |       |
| Pc_TC125623 | -1.04 | 0.25  |      | 0.89  | 0.3       |      | -1.54 | 0.25      |      | -2.12 | 0.05  | Down | Ribosomal S17 family protein                      |       |
| Pc_TC125633 | 0.37  | 0.66  |      | 1.67  | 0.04      | Up   | -1.5  | 0.27      |      | -0.15 | 0.9   |      | prephenate dehydrogenase family protein           |       |
| Pc_TC125635 | 0.12  | 0.88  |      | -1.13 | 0.2       |      | -0.47 | 0.69      |      | -2.13 | 0.02  | Down | Expressed protein                                 |       |
| Pc_TC125638 | -2.78 | 0     | Down | -1.53 | 0.07      |      | 0.86  | 0.42      |      | 0.43  | 0.57  |      | Expressed protein                                 |       |
| Pc_TC125660 | 2.32  | 0.03  | Up   | 1.5   | 0.27      |      | 1.09  | 0.53      |      | -0.37 | 0.91  |      | Expressed protein                                 |       |
| Pc_TC125667 | 0.77  | 0.22  |      | 1.51  | 0.03      | Up   | -1.96 | 0.11      |      | -0.73 | 0.37  |      | Expressed protein                                 |       |
| Pc_TC125698 | 3.85  | ##### | Up   | 3.06  | 0.01      | Up   | -0.08 | 1         |      | 3.71  | 0     | Up   | cDNA clone: J065035115,full insert sequence       |       |
| Pc_TC125700 | 0.46  | 0.43  |      | 0.31  | 0.66      |      | -1.54 | 0.17      |      | -2.08 | 0.01  | Down | Transposon protein                                |       |
| Pc_TC125717 | 2.99  | 0.06  |      | 3.7   | 0.02      | Up   | -0.5  | 1         |      | 0     | 0.54  |      | Expressed protein                                 |       |
| Pc_TC125727 | 2.35  | 0.03  | Up   | 0.93  | 0.59      |      | -3.08 | 0.29      |      | 1.21  | 0.41  |      | Expressed protein                                 |       |
| Pc_TC125787 | -2.83 | 0.02  | Down | -0.76 | 0.49      |      | 1.76  | 0.13      |      | 1.21  | 0.16  |      | Expressed protein                                 |       |
| Pc_TC125788 | 0.46  | 0.17  |      | -0.19 | 0.68      |      | 0.96  | 0.26      |      | 1.09  | 0.03  | Up   | Expressed protein                                 |       |
| Pc_TC125815 | -4.78 | ##### | Down | -5.38 | 7.28E-008 | Down | -5.13 | 0         | Down | -5.82 | ##### | Down | actin-11                                          |       |
| Pc_TC125819 | 0.03  | 1     |      | 0.57  | 0.56      |      | -2.13 | 0.15      |      | -3.18 | 0.01  | Down | Expressed protein                                 |       |
| Pc_TC125830 | 0.82  | 0.63  |      | 2.87  | 0.01      | Up   | -1.08 | 0.68      |      | -0.96 | 0.68  |      | Expressed protein                                 |       |
| Pc_TC125845 | -0.92 | 0.39  |      | -2.2  | 0.1       |      | -3.5  | 0.04      | Down | -0.37 | 0.75  |      | Expressed protein                                 |       |
| Pc_TC125867 | 0.54  | 0.45  |      | 0.14  | 0.89      |      | -4.22 | 0.01      | Down | -2.78 | 0.01  | Down | Zinc-binding dehydrogenase family protein         |       |
| Pc_TC125877 | 0.61  | 0.25  |      | 0.63  | 0.32      |      | -2.19 | 0.05      | Down | -0.32 | 0.65  |      | Expressed protein                                 |       |
| Pc_TC125879 | 0.7   | 0.35  |      | 1.18  | 0.15      |      | -2.85 | 0.05      | Down | -2.41 | 0.02  | Down | Expressed protein                                 |       |
| Pc_TC125887 | -2.24 | 0.04  | Down | -1.68 | 0.15      |      | -0.82 | 0.55      |      | -0.89 | 0.4   |      | B-block binding subunit of TFIIC                  |       |
| Pc_TC125894 | 1.83  | 0.01  | Up   | 0     | 0         |      | 0.74  | 0.57      |      | 0.27  | 0.82  |      | aspartate aminotransferase 1                      |       |

|             |       |       |      |       |           |      |       |           |      |       |       |      |                                                              |      |
|-------------|-------|-------|------|-------|-----------|------|-------|-----------|------|-------|-------|------|--------------------------------------------------------------|------|
| Pc_TC125902 | -0.07 | 1     |      | 2.08  | 0.02      | Up   | 0     | 0.01      |      | 0     | 0     |      | pleiotropic drug resistance 2                                |      |
| Pc_TC125926 | 1.14  | 0.1   |      | 1.99  | 0.01      | Up   | -0.1  | 0.95      |      | 0.32  | 0.73  |      | Expressed protein                                            |      |
| Pc_TC125930 | 0.04  | 1     |      | -0.11 | 0.94      |      | 0     | 0         |      | -3    | 0.01  | Down | Expressed protein                                            |      |
| Pc_TC125938 | 1.69  | 0.04  | Up   | 0     | 0.01      |      | 1.49  | 0.24      |      | -0.37 | 0.77  |      | multiprotein bridging factor 1A                              | MBF1 |
| Pc_TC125942 | 1.39  | 0.05  | Up   | 2.59  | 0         | Up   | 0.7   | 0.56      |      | 1.05  | 0.21  |      | Expressed protein                                            |      |
| Pc_TC125956 | -0.8  | 0.63  |      | 0.51  | 0.74      |      | 2.64  | 0.04      | Up   | 1.41  | 0.2   |      | Expressed protein                                            |      |
| Pc_TC125971 | 4.54  | 0.01  | Up   | 0.06  | 1         |      | 2.83  | 0.32      |      | 4.15  | 0.02  | Up   | Expressed protein                                            |      |
| Pc_TC125974 | 2.18  | 0.04  | Up   | 1.25  | 0.38      |      | -2.3  | 0.36      |      | 0.28  | 0.94  |      | Uncharacterized protein                                      |      |
| Pc_TC125983 | 1.91  | 0     | Up   | 0     | 0         |      | 0.49  | 0.69      |      | -0.56 | 0.56  |      | long-chain acyl-CoA synthetase 6                             |      |
| Pc_TC125984 | 0.03  | 1     |      | 0.37  | 0.66      |      | 0     | 0         |      | -3.91 | 0     | Down | Expressed protein                                            |      |
| Pc_TC125988 | 0.08  | 1     |      | 0.64  | 0.84      |      | 3.34  | 0.03      | Up   | 0.43  | 0.93  |      | Expressed protein                                            |      |
| Pc_TC125994 | -0.4  | 0.6   |      | 0.1   | 0.92      |      | -3.04 | 0.02      | Down | -0.76 | 0.37  |      | Expressed protein                                            |      |
| Pc_TC126019 | 2     | 0.04  | Up   | 0.54  | 0.73      |      | 1.04  | 0.5       |      | 1.16  | 0.33  |      | Expressed protein                                            |      |
| Pc_TC126038 | 0.22  | 0.58  |      | 0.24  | 0.63      |      | -5.3  | 3.99E-006 | Down | -2.64 | ##### | Down | Expressed protein                                            |      |
| Pc_TC126049 | 2.04  | ##### | Up   | 0     | 1.35E-009 |      | 1.54  | 0.13      |      | -0.28 | 0.7   |      | Ribosomal protein L11 family protein                         |      |
| Pc_TC126056 | -0.01 | 1     |      | 0.18  | 0.88      |      | -4.04 | 0.01      | Down | -1.18 | 0.24  |      | Xanthine/uracil permease family protein                      |      |
| Pc_TC126074 | 0.56  | 0.3   |      | 1.3   | 0.04      | Up   | -3.19 | 0.01      | Down | -1.88 | 0.01  | Down | Expressed protein                                            |      |
| Pc_TC126079 | 1.1   | 0.04  | Up   | 0.69  | 0.3       |      | -0.68 | 0.53      |      | 0.59  | 0.4   |      | Expressed protein                                            |      |
| Pc_TC126081 | -3.31 | 0.02  | Down | 0     | 0.01      |      | -0.72 | 0.64      |      | -1.96 | 0.12  |      | hypothetical protein OsJ 10390 [Oryza sativa Japonica Group] |      |
| Pc_TC126101 | -2.04 | 0.04  | Down | 1.15  | 0.16      |      | -1.2  | 0.36      |      | -2.85 | 0.01  | Down | Expressed protein                                            |      |
| Pc_TC126114 | 0.64  | 0.38  |      | 0.64  | 0.44      |      | 0     | 0         |      | -2.44 | 0.02  | Down | Putative polyprotein                                         |      |
| Pc_TC126120 | -0.76 | 0.47  |      | 0.32  | 0.78      |      | -4.14 | 0.02      | Down | -2.21 | 0.07  |      | Expressed protein                                            |      |
| Pc_TC126125 | 2.44  | 0.01  | Up   | 0     | 0.11      |      | 1.26  | 0.43      |      | 0.8   | 0.58  |      | secE/sec61-gamma protein transport protein                   |      |
| Pc_TC126139 | -0.56 | 0.7   |      | 0.64  | 0.61      |      | 1.94  | 0.14      |      | 2.14  | 0.02  | Up   | Expressed protein                                            |      |
| Pc_TC126154 | -0.57 | 0.28  |      | -1.44 | 0.03      | Down | 1.89  | 0.05      | Up   | 1.04  | 0.09  |      | Expressed protein                                            |      |
| Pc_TC126185 | 0.11  | 0.81  |      | 0.1   | 0.86      |      | -1.89 | 0.06      |      | -1.71 | 0.01  | Down | Expressed protein                                            |      |
| Pc_TC126191 | -1.7  | 0.03  | Down | 0.17  | 0.85      |      | -3.06 | 0.02      | Down | -1.4  | 0.11  |      | damaged DNA binding protein 1B                               |      |
| Pc_TC126216 | 1.16  | 0.2   |      | -0.12 | 0.98      |      | -4.58 | 0.03      | Down | -0.76 | 0.56  |      | Expressed protein                                            |      |
| Pc_TC126247 | 2.54  | 0.01  | Up   | 0     | 0.11      |      | 2.63  | 0.06      |      | 2.71  | 0.01  | Up   | NAD(P)-binding Rossmann-fold superfamily protein             |      |
| Pc_TC126252 | 0.08  | 1     |      | 2.8   | 0         | Up   | -0.5  | 0.77      |      | -1.37 | 0.31  |      | Ribosomal protein L13 family protein                         |      |
| Pc_TC126292 | -2.32 | 0.01  | Down | -2.8  | 0.01      | Down | 0.44  | 0.71      |      | -1.15 | 0.2   |      | Os01g0666000 protein                                         |      |
| Pc_TC126309 | -0.2  | 0.8   |      | 2.05  | 0         | Up   | 0     | 8.44E-005 |      | -3.74 | 0     | Down | cinnamyl-alcohol dehydrogenase                               |      |
| Pc_TC126334 | -1.16 | 0.05  | Down | -0.93 | 0.18      |      | 0.71  | 0.48      |      | -0.16 | 0.82  |      | Expressed protein                                            |      |
| Pc_TC126358 | 1     | 0.42  |      | 1.06  | 0.43      |      | -0.86 | 0.69      |      | 2.39  | 0.02  | Up   | Expressed protein                                            |      |
| Pc_TC126375 | 0.48  | 0.24  |      | 0.75  | 0.14      |      | -1.13 | 0.24      |      | -1.76 | 0.01  | Down | Expressed protein                                            |      |
| Pc_TC126382 | -1.92 | 0.36  |      | 0.87  | 0.57      |      | 3.48  | 0.01      | Up   | 2.12  | 0.06  |      | Expressed protein                                            |      |
| Pc_TC126406 | 0.33  | 0.47  |      | 1.25  | 0.02      | Up   | -4.69 | 8.78E-005 | Down | -1.71 | 0.01  | Down | seed imbibition 2                                            |      |
| Pc_TC126407 | 0.84  | 0.07  |      | 0.84  | 0.14      |      | -2.88 | 0.01      | Down | -1.97 | 0     | Down | seed imbibition 2                                            |      |
| Pc_TC126425 | -0.53 | 0.56  |      | 1.19  | 0.15      |      | -3.16 | 0.03      | Down | -1.72 | 0.1   |      | Expressed protein                                            |      |
| Pc_TC126431 | -0.09 | 0.9   |      | 1.49  | 0.02      | Up   | -2.86 | 0.02      | Down | -3.81 | ##### | Down | Expressed protein                                            |      |
| Pc_TC126439 | -1.02 | 0.45  |      | 1.85  | 0.06      |      | 2.15  | 0.09      |      | 2.06  | 0.03  | Up   | Putative uncharacterized protein                             |      |
| Pc_TC126445 | -0.76 | 0.47  |      | 0.58  | 0.57      |      | -2.33 | 0.13      |      | -2.7  | 0.04  | Down | Expressed protein                                            |      |
| Pc_TC126450 | 0.59  | 0.28  |      | 0.66  | 0.31      |      | -2.54 | 0.03      | Down | -1.62 | 0.03  | Down | Expressed protein                                            |      |
| Pc_TC126477 | 0.34  | 0.47  |      | 0.14  | 0.81      |      | -1.94 | 0.06      |      | -1.73 | 0.01  | Down | Expressed protein                                            |      |
| Pc_TC126501 | 4.63  | 0     | Up   | 4.99  | 9.12E-005 | Up   | 2.83  | 0.16      |      | 3.21  | 0.04  | Up   | Expressed protein                                            |      |
| Pc_TC126507 | -1.38 | 0.23  |      | 1.55  | 0.09      |      | -4.96 | 0.02      | Down | -0.08 | 0.98  |      | Putative uncharacterized protein Sb01g009436 (Fragment)      |      |
| Pc_TC126516 | 0.77  | 0.31  |      | 1.19  | 0.15      |      | -2.86 | 0.05      |      | -2.54 | 0.02  | Down | Uncharacterized protein                                      |      |
| Pc_TC126541 | -0.92 | 0.43  |      | -3.26 | 0.05      | Down | -0.65 | 0.68      |      | -1.11 | 0.36  |      | Expressed protein                                            |      |
| Pc_TC126558 | -0.24 | 0.79  |      | 0.29  | 0.76      |      | 2.18  | 0.05      |      | 1.93  | 0.01  | Up   | Expressed protein                                            |      |
| Pc_TC126570 | 0     | ##### |      | -5.15 | 0         | Down | -1.54 | 0.25      |      | -3    | 0.01  | Down | GTP binding Elongation factor Tu family protein              |      |
| Pc_TC126582 | -1.49 | 0.06  |      | -0.57 | 0.5       |      | -2    | 0.11      |      | -2.76 | 0     | Down | Expressed protein                                            |      |
| Pc_TC126606 | 0.33  | 0.68  |      | 1.69  | 0.03      | Up   | -2.08 | 0.12      |      | 0.04  | 0.99  |      | Expressed protein                                            |      |
| Pc_TC126612 | 2.54  | 0.02  | Up   | 0     | 0.2       |      | 1.09  | 0.56      |      | 1.13  | 0.45  |      | Expressed protein                                            |      |
| Pc_TC126615 | 2.18  | ##### | Up   | 0     | 6.24E-007 |      | 2.06  | 0.05      | Up   | 0.86  | 0.24  |      | Expressed protein                                            |      |
| Pc_TC126622 | 1.93  | 0     | Up   | 0     | 8.90E-006 |      | 1.64  | 0.13      |      | 0.08  | 0.95  |      | Expressed protein                                            |      |
| Pc_TC126627 | -0.83 | 0.4   |      | 0.11  | 0.95      |      | -2.6  | 0.09      |      | -2.47 | 0.04  | Down | Expressed protein                                            |      |
| Pc_TC126640 | 3.15  | 0     | Up   | 0     | 0.27      |      | 1.88  | 0.26      |      | 0.89  | 0.63  |      | Expressed protein                                            |      |
| Pc_TC126648 | -1.62 | 0.29  |      | -0.83 | 0.61      |      | -0.61 | 0.74      |      | -4.08 | 0.04  | Down | Expressed protein                                            |      |
| Pc_TC126654 | 0.21  | 0.57  |      | 0.58  | 0.22      |      | -1.28 | 0.17      |      | -1.59 | 0.01  | Down | Expressed protein                                            |      |
| Pc_TC126673 | -0.71 | 0.42  |      | -1.49 | 0.16      |      | -1.57 | 0.24      |      | -2.82 | 0.01  | Down | Expressed protein                                            |      |
| Pc_TC126734 | 1.79  | 0.04  | Up   | 2.01  | 0.04      | Up   | 0.55  | 0.72      |      | -0.19 | 0.93  |      | Expressed protein                                            |      |
| Pc_TC126736 | 3.08  | 0.05  | Up   | 2.06  | 0.36      |      | 0.09  | 1         |      | 2.8   | 0.1   |      | Uncharacterized protein                                      |      |

|             |       |       |      |       |           |      |       |           |      |       |       |      |                                                                     |
|-------------|-------|-------|------|-------|-----------|------|-------|-----------|------|-------|-------|------|---------------------------------------------------------------------|
| Pc_TC126746 | 3.05  | 0     | Up   | 0     | 0.2       |      | 2.92  | 0.04      | Up   | 0.85  | 0.61  |      | Expressed protein                                                   |
| Pc_TC126756 | -1.58 | 0.09  |      | -1.38 | 0.19      |      | -2.74 | 0.06      |      | -2.82 | 0.01  | Down | Uncharacterized protein                                             |
| Pc_TC126769 | -0.2  | 0.66  |      | 0.21  | 0.7       |      | -1.12 | 0.25      |      | -1.51 | 0.02  | Down | Expressed protein                                                   |
| Pc_TC126770 | 0.91  | 0.22  |      | -0.06 | 0.98      |      | 1.73  | 0.13      |      | 1.64  | 0.04  | Up   | Expressed protein                                                   |
| Pc_TC126771 | -0.34 | 0.75  |      | 0.95  | 0.3       |      | -3.3  | 0.04      | Down | -2.01 | 0.08  |      | Expressed protein                                                   |
| Pc_TC126781 | -1.8  | 0.01  | Down | -2.15 | 0.01      | Down | -1.51 | 0.17      |      | -3.14 | 0     | Down | Expressed protein                                                   |
| Pc_TC126788 | -3.31 | 0     | Down | -3.33 | 0.01      | Down | 0     | 0         |      | 0     | ##### |      | GTP binding Elongation factor Tu family protein                     |
| Pc_TC126808 | -1.58 | 0.02  | Down | -0.98 | 0.18      |      | 0.05  | 0.97      |      | -0.24 | 0.74  |      | asparagine synthetase 3                                             |
| Pc_TC126809 | -2.15 | 0     | Down | -3.92 | 8.48E-007 | Down | -0.08 | 0.94      |      | -2.63 | 0     | Down | asparagine synthetase 3                                             |
| Pc_TC126810 | -0.97 | 0.31  |      | 0.34  | 0.74      |      | 2.89  | 0.01      | Up   | 1.41  | 0.09  |      | glutamine-dependent asparagine synthase 1                           |
| Pc_TC126811 | -2.11 | 0     | Down | -2.27 | 0         | Down | 0.76  | 0.46      |      | -0.72 | 0.33  |      | glutamine-dependent asparagine synthase 1                           |
| Pc_TC126812 | 0.24  | 0.71  |      | -2.04 | 0.02      | Down | 1.78  | 0.09      |      | 0.46  | 0.54  |      | glutamine-dependent asparagine synthase 1                           |
| Pc_TC126813 | 1.02  | 0.08  |      | 0.26  | 0.72      |      | 2.97  | 0         | Up   | 1.1   | 0.12  |      | asparagine synthetase 3                                             |
| Pc_TC126827 | 4.17  | 0     | Up   | 0     | 0.67      |      | 1.67  | 0.53      |      | 0     | 0.54  |      | Polynucleotidyl transferase,ribonuclease H-like superfamily protein |
| Pc_TC126829 | 1.08  | 0.77  |      | 3.38  | 0.04      | Up   | 1.67  | 0.53      |      | -0.37 | 1     |      | Expressed protein                                                   |
| Pc_TC126860 | 0.66  | 0.41  |      | 0.67  | 0.47      |      | -4.5  | 0.01      | Down | -2.79 | 0.02  | Down | Expressed protein                                                   |
| Pc_TC126884 | 0.61  | 0.3   |      | 0.62  | 0.38      |      | -3.04 | 0.01      | Down | 0.88  | 0.21  |      | Expressed protein                                                   |
| Pc_TC126896 | -0.47 | 0.61  |      | 0.71  | 0.43      |      | -3.04 | 0.04      | Down | -2.04 | 0.06  |      | Expressed protein                                                   |
| Pc_TC126910 | 0.47  | 0.58  |      | 0.48  | 0.62      |      | -4.5  | 0.01      | Down | -0.47 | 0.65  |      | Expressed protein                                                   |
| Pc_TC126912 | -0.99 | 0.03  |      | -1.34 | 0.02      | Down | 2.27  | 0.01      | Up   | 0.86  | 0.13  |      | Expressed protein                                                   |
| Pc_TC126913 | 0.8   | 0.3   |      | 0.4   | 0.68      |      | -4.58 | 0.01      | Down | -2    | 0.07  |      | Expressed protein                                                   |
| Pc_TC126916 | 0.23  | 0.83  |      | 1.06  | 0.25      |      | -3.25 | 0.05      | Down | -3.13 | 0.02  | Down | Expressed protein                                                   |
| Pc_TC126923 | -2.41 | 0.04  | Down | -1.43 | 0.22      |      | -1.4  | 0.33      |      | -1.09 | 0.31  |      | Expressed protein                                                   |
| Pc_TC126927 | -1.36 | 0.09  |      | -2.32 | 0.02      | Down | -0.12 | 0.93      |      | -0.21 | 0.82  |      | Expressed protein                                                   |
| Pc_TC126929 | -0.68 | 0.32  |      | -1.36 | 0.1       |      | -1.1  | 0.34      |      | -2.25 | 0.01  | Down | Expressed protein                                                   |
| Pc_TC126932 | -0.28 | 0.66  |      | -6.81 | 1.40E-007 | Down | -0.1  | 0.93      |      | -2.66 | 0     | Down | Expressed protein                                                   |
| Pc_TC126969 | 0.63  | 0.26  |      | 1.17  | 0.07      |      | -2.85 | 0.02      | Down | -1.89 | 0.02  | Down | Expressed protein                                                   |
| Pc_TC127001 | 1.36  | 0.13  |      | 1.89  | 0.05      | Up   | -0.69 | 0.68      |      | 1.43  | 0.15  |      | OSJNBa0033H08.10 protein                                            |
| Pc_TC127010 | -1.97 | 0.07  |      | -1.34 | 0.24      |      | 3.05  | 0.01      | Up   | 0.9   | 0.32  |      | Os02g0649400 protein                                                |
| Pc_TC127018 | 1.72  | 0     | Up   | 0     | 7.81E-007 |      | 1.11  | 0.3       |      | 0.17  | 0.83  |      | haloacid dehalogenase-like hydrolase family protein                 |
| Pc_TC127025 | 0.25  | 0.76  |      | -0.1  | 0.93      |      | -4.47 | 0         | Down | -2.47 | 0.02  | Down | Expressed protein                                                   |
| Pc_TC127031 | 0.08  | 1     |      | -4.03 | 0.04      | Down | 0.42  | 0.79      |      | 0.29  | 0.83  |      | Expressed protein                                                   |
| Pc_TC127041 | 0.92  | 0.15  |      | 1.85  | 0.01      | Up   | -2.68 | 0.04      | Down | -1.18 | 0.17  |      | chitinase A                                                         |
| Pc_TC127043 | 0.7   | 0.02  |      | 0.58  | 0.12      |      | -2.08 | 0.01      | Down | -0.76 | 0.12  |      | chitinase A                                                         |
| Pc_TC127067 | 0.3   | 0.63  |      | 1.6   | 0.01      | Up   | -6.18 | 8.69E-005 | Down | -1.28 | 0.11  |      | Expressed protein                                                   |
| Pc_TC127085 | -0.22 | 0.86  |      | 0.7   | 0.47      |      | -3.67 | 0.03      | Down | -5.13 | 0     | Down | Expressed protein                                                   |
| Pc_TC127091 | 0.08  | 0.95  |      | 1.37  | 0.08      |      | -5.02 | 0         | Down | -2.31 | 0.02  | Down | Expressed protein                                                   |
| Pc_TC127093 | 1.3   | 0.2   |      | 0.72  | 0.58      |      | 1.24  | 0.39      |      | 2.08  | 0.04  | Up   | Expressed protein                                                   |
| Pc_TC127095 | -0.34 | 0.8   |      | 0.32  | 0.8       |      | -3.82 | 0.04      | Down | 0     | 0     |      | Expressed protein                                                   |
| Pc_TC127102 | 1.17  | 0.03  | Up   | 1.25  | 0.05      |      | -1.06 | 0.33      |      | 1.1   | 0.11  |      | Expressed protein                                                   |
| Pc_TC127107 | -2.16 | 0.04  | Down | -2.66 | 0.03      | Down | 0.85  | 0.48      |      | -0.13 | 0.92  |      | Expressed protein                                                   |
| Pc_TC127172 | -1.97 | 0.01  | Down | -2.66 | 0         | Down | 1.57  | 0.13      |      | 0.49  | 0.5   |      | Protein kinase family protein with leucine-rich repeat domain       |
| Pc_TC127188 | 0.48  | 0.42  |      | 0.99  | 0.14      |      | -2.32 | 0.05      | Down | -1.29 | 0.1   |      | Expressed protein                                                   |
| Pc_TC127213 | 0.78  | 0.02  |      | 0.67  | 0.11      |      | -6.05 | 1.70E-008 | Down | -2.77 | ##### | Down | Expressed protein                                                   |
| Pc_TC127214 | 0.36  | 0.59  |      | 0.28  | 0.73      |      | -2.6  | 0.04      | Down | -2.04 | 0.02  | Down | Expressed protein                                                   |
| Pc_TC127217 | -1.03 | 0.31  |      | 0.84  | 0.37      |      | -3.3  | 0.04      | Down | -1.01 | 0.35  |      | Bm8 interacting protein 2d-4                                        |
| Pc_TC127219 | 1.77  | 0     | Up   | 0     | 1.23E-006 |      | 2.33  | 0.03      | Up   | 1.26  | 0.08  |      | Expressed protein                                                   |
| Pc_TC127227 | 2.96  | 0     | Up   | 0     | 0.02      |      | 2.22  | 0.08      |      | 0.28  | 0.86  |      | RAC-like 3                                                          |
| Pc_TC127230 | 2.47  | 0     | Up   | 0     | 0.02      |      | 1.2   | 0.37      |      | -1.05 | 0.43  |      | Translocon-associated protein (TRAP),alpha subunit                  |
| Pc_TC127231 | 0.31  | 0.5   |      | 0.44  | 0.44      |      | -2.32 | 0.03      | Down | -1.05 | 0.1   |      | Expressed protein                                                   |
| Pc_TC127240 | 3.27  | ##### | Up   | 0     | 0.01      |      | 2.62  | 0.03      | Up   | 2.02  | 0.02  | Up   | Expressed protein                                                   |
| Pc_TC127251 | -0.02 | 1     |      | 0.15  | 0.96      |      | -4.4  | 0.05      | Down | -3.28 | 0.05  |      | Expressed protein                                                   |
| Pc_TC127255 | -0.2  | 0.89  |      | 1.23  | 0.19      |      | -2.44 | 0.13      |      | -3.9  | 0.01  | Down | Expressed protein                                                   |
| Pc_TC127260 | 2.6   | 0     | Up   | 0     | 0.02      |      | 2.76  | 0.02      | Up   | 0.83  | 0.44  |      | NADP-malic enzyme 1                                                 |
| Pc_TC127269 | 0.39  | 0.62  |      | 0.86  | 0.31      |      | -3.08 | 0.03      | Down | -2.45 | 0.02  | Down | Expressed protein                                                   |
| Pc_TC127279 | -0.38 | 0.62  |      | -0.16 | 0.86      |      | -2.67 | 0.04      | Down | -1.26 | 0.15  |      | Expressed protein                                                   |
| Pc_TC127301 | 0.37  | 0.62  |      | 1.35  | 0.07      |      | -4.25 | 0         | Down | -1.13 | 0.21  |      | Expressed protein                                                   |
| Pc_TC127332 | -2.68 | 0     | Down | -1.05 | 0.26      |      | 0.33  | 0.78      |      | -0.27 | 0.77  |      | Os06g0340200 protein                                                |
| Pc_TC127341 | 2.6   | 0     | Up   | 0     | 0         |      | 3.8   | 0         | Up   | 0.8   | 0.39  |      | Expressed protein                                                   |
| Pc_TC127350 | -0.47 | 0.71  |      | 0.27  | 0.85      |      | -3.74 | 0.05      | Down | -0.45 | 0.73  |      | Expressed protein                                                   |
| Pc_TC127358 | -0.76 | 0.37  |      | -0.08 | 0.96      |      | 2.51  | 0.02      | Up   | 1.93  | 0.01  | Up   | Expressed protein                                                   |
| Pc_TC127371 | 0.28  | 0.81  |      | 0.87  | 0.4       |      | -3.23 | 0.07      |      | -3.11 | 0.03  | Down | Expressed protein                                                   |

|             |       |       |      |       |           |      |       |      |      |       |       |      |                                                             |
|-------------|-------|-------|------|-------|-----------|------|-------|------|------|-------|-------|------|-------------------------------------------------------------|
| Pc_TC127375 | -2.18 | 0.01  | Down | -0.23 | 0.79      |      | 1.43  | 0.18 |      | 1.08  | 0.14  |      | Expressed protein                                           |
| Pc_TC127377 | -0.21 | 0.96  |      | -1.08 | 0.54      |      | 3.55  | 0    | Up   | 1.97  | 0.06  |      | Expressed protein                                           |
| Pc_TC127386 | 0.71  | 0.11  |      | 0.75  | 0.17      |      | -2.9  | 0.01 | Down | -0.45 | 0.47  |      | Expressed protein                                           |
| Pc_TC127403 | -0.1  | 0.91  |      | 0.36  | 0.66      |      | -2.7  | 0.04 | Down | -2.96 | 0     | Down | Phosphoglycerate mutase,2,3-bisphosphoglycerate-independent |
| Pc_TC127408 | 0.03  | 1     |      | 1.08  | 0.23      |      | -4.35 | 0.01 | Down | -1.15 | 0.29  |      | Expressed protein                                           |
| Pc_TC127445 | -0.03 | 1     |      | -0.89 | 0.44      |      | -0.73 | 0.61 |      | -3.13 | 0.02  | Down | Expressed protein                                           |
| Pc_TC127452 | 0.57  | 0.1   |      | 0.6   | 0.18      |      | -3.05 | 0    | Down | -2.28 | ##### | Down | Expressed protein                                           |
| Pc_TC127454 | 0.1   | 0.91  |      | 0.84  | 0.27      |      | -3.98 | 0.01 | Down | -2.27 | 0.01  | Down | Expressed protein                                           |
| Pc_TC127456 | 0.16  | 0.88  |      | 0.17  | 0.88      |      | -4.67 | 0.01 | Down | -1.02 | 0.31  |      | Expressed protein                                           |
| Pc_TC127494 | 2.44  | 0     | Up   | 0     | 0         |      | 2.15  | 0.05 |      | 0.28  | 0.77  |      | Expressed protein                                           |
| Pc_TC127498 | 0.29  | 0.48  |      | 0.35  | 0.5       |      | -2.28 | 0.02 | Down | -1.16 | 0.05  |      | Expressed protein                                           |
| Pc_TC127500 | -0.23 | 0.81  |      | 1.04  | 0.22      |      | -3.08 | 0.04 | Down | -1.09 | 0.28  |      | Expressed protein                                           |
| Pc_TC127517 | 1.66  | 0.03  | Up   | 0     | 0         |      | 1.34  | 0.28 |      | 0.23  | 0.85  |      | vacuolar ATP synthase subunit A                             |
| Pc_TC127522 | -3.09 | 0.04  | Down | -1.3  | 0.35      |      | -0.58 | 0.72 |      | -1.22 | 0.34  |      | Expressed protein                                           |
| Pc_TC127523 | -1.47 | 0.13  |      | -2.75 | 0.03      | Down | 0.44  | 0.73 |      | 0.08  | 0.96  |      | Expressed protein                                           |
| Pc_TC127538 | 0.36  | 0.79  |      | 0.71  | 0.56      |      | -1.5  | 0.39 |      | -4.18 | 0.03  | Down | Uncharacterized protein                                     |
| Pc_TC127539 | 0.38  | 0.69  |      | -3.06 | 0.03      | Down | -2.2  | 0.15 |      | -1.75 | 0.13  |      | Expressed protein                                           |
| Pc_TC127548 | 1.93  | 0.01  | Up   | 0     | 0         |      | 1.2   | 0.32 |      | 0.44  | 0.65  |      | arabinogalactan protein 19                                  |
| Pc_TC127550 | -0.84 | 0.3   |      | -0.4  | 0.66      |      | 2.2   | 0.04 | Up   | 1.78  | 0.02  | Up   | Expressed protein                                           |
| Pc_TC127563 | -1.22 | 0.24  |      | -2.7  | 0.05      | Down | 0.39  | 0.78 |      | -2.13 | 0.07  |      | Expressed protein                                           |
| Pc_TC127578 | 0.78  | 0.06  |      | 1.04  | 0.04      | Up   | -0.52 | 0.59 |      | 2.2   | ##### | Up   | Expressed protein                                           |
| Pc_TC127586 | 0.09  | 0.89  |      | -0.21 | 0.78      |      | -2.54 | 0.03 | Down | -0.86 | 0.25  |      | Expressed protein                                           |
| Pc_TC127590 | -2.57 | 0.04  | Down | -2.26 | 0.09      |      | 0.47  | 0.73 |      | -1.32 | 0.25  |      | Expressed protein                                           |
| Pc_TC127598 | 2.04  | 0.03  | Up   | 0     | 0.07      |      | 1.47  | 0.31 |      | 0.63  | 0.66  |      | Expressed protein                                           |
| Pc_TC127604 | -0.88 | 0.32  |      | 0.13  | 0.91      |      | -0.14 | 0.93 |      | -2.2  | 0.04  | Down | RMUA                                                        |
| Pc_TC127614 | -0.18 | 0.92  |      | -0.65 | 0.64      |      | 0.09  | 0.99 |      | 2.2   | 0.01  | Up   | Expressed protein                                           |
| Pc_TC127628 | -1.61 | 0.01  | Down | -1.06 | 0.15      |      | -0.99 | 0.36 |      | -1.58 | 0.04  | Down | BED zinc finger ;hAT family dimerisation domain             |
| Pc_TC127635 | 1.25  | 0.48  |      | 3.19  | 0.01      | Up   | 2.2   | 0.2  |      | 1.21  | 0.5   |      | Expressed protein                                           |
| Pc_TC127638 | 0.31  | 0.61  |      | 0.75  | 0.26      |      | -2.51 | 0.03 | Down | -1.58 | 0.04  | Down | Expressed protein                                           |
| Pc_TC127662 | 2.54  | 0.15  |      | 1.64  | 0.53      |      | 2.5   | 0.25 |      | 3.53  | 0.02  | Up   | Expressed protein                                           |
| Pc_TC127695 | 1.26  | 0.01  | Up   | 0.54  | 0.4       |      | -0.24 | 0.82 |      | 1.51  | 0.02  | Up   | Putative polyprotein                                        |
| Pc_TC127710 | 0.4   | 0.85  |      | 2.42  | 0.03      | Up   | -0.04 | 1    |      | -0.05 | 1     |      | Expressed protein                                           |
| Pc_TC127739 | -1.27 | 0.19  |      | -2.99 | 0.02      | Down | 1.15  | 0.34 |      | -0.1  | 0.95  |      | Expressed protein                                           |
| Pc_TC127760 | -1.98 | 0.03  | Down | -0.26 | 0.79      |      | -1.05 | 0.4  |      | -1.56 | 0.1   |      | Expressed protein                                           |
| Pc_TC127764 | -0.47 | 0.71  |      | 0.94  | 0.36      |      | -3.74 | 0.05 | Down | -3.04 | 0.04  | Down | Expressed protein                                           |
| Pc_TC127767 | 0.68  | 0.45  |      | 1.86  | 0.03      | Up   | -1.32 | 0.37 |      | 0.27  | 0.82  |      | Expressed protein                                           |
| Pc_TC127810 | -4.73 | 0     | Down | -1.94 | 0.11      |      | -0.66 | 0.64 |      | 0     | 0     |      | Expressed protein                                           |
| Pc_TC127820 | -0.04 | 1     |      | 0.68  | 0.6       |      | -2.61 | 0.18 |      | -4.08 | 0.04  | Down | Expressed protein                                           |
| Pc_TC127827 | 0     | 1     |      | 0.13  | 0.91      |      | -2.82 | 0.05 | Down | -0.3  | 0.76  |      | K+ uptake permease 11                                       |
| Pc_TC127828 | 2.92  | ##### | Up   | 0     | 0.01      |      | 2.61  | 0.03 | Up   | 1.66  | 0.07  |      | succinate dehydrogenase 2-2                                 |
| Pc_TC127845 | 0.63  | 0.42  |      | 0.49  | 0.6       |      | 2.25  | 0.05 | Up   | 0.42  | 0.66  |      | Expressed protein                                           |
| Pc_TC127862 | -2.32 | 0.02  | Down | -1.24 | 0.24      |      | 0.2   | 0.89 |      | -1.41 | 0.16  |      | Expressed protein                                           |
| Pc_TC127870 | 0.55  | 0.45  |      | 0.91  | 0.26      |      | -4.02 | 0.01 | Down | -1.37 | 0.15  |      | Expressed protein                                           |
| Pc_TC127909 | 3.02  | 0     | Up   | 0     | 0.2       |      | 2.31  | 0.13 |      | 2.08  | 0.09  |      | Uncharacterized protein                                     |
| Pc_TC127918 | -1.16 | 0.11  |      | -1.71 | 0.05      | Down | 1.49  | 0.16 |      | 0.27  | 0.73  |      | Expressed protein                                           |
| Pc_TC127939 | -0.26 | 0.72  |      | -0.07 | 0.95      |      | -3.48 | 0.01 | Down | -3.35 | 0     | Down | Expressed protein                                           |
| Pc_TC127954 | 0.16  | 0.85  |      | 1.35  | 0.07      |      | -2.55 | 0.06 |      | -2.22 | 0.02  | Down | Expressed protein                                           |
| Pc_TC127962 | 0.43  | 0.47  |      | 0.94  | 0.16      |      | -3.09 | 0.01 | Down | -2.01 | 0.01  | Down | Expressed protein                                           |
| Pc_TC127972 | 1.01  | 0.23  |      | 0.12  | 0.95      |      | -4.02 | 0.03 | Down | -0.58 | 0.62  |      | Expressed protein                                           |
| Pc_TC127985 | 2.74  | 0.01  | Up   | 0     | 0.2       |      | 1.96  | 0.21 |      | -0.37 | 0.93  |      | Expressed protein                                           |
| Pc_TC128005 | 0.29  | 0.59  |      | 1.17  | 0.06      |      | -3.76 | 0    | Down | -1.66 | 0.03  | Down | Expressed protein                                           |
| Pc_TC128055 | 4.03  | 0     | Up   | 1.06  | 0.8       |      | 1.31  | 0.68 |      | 3.53  | 0.02  | Up   | MutS protein-like protein 5                                 |
| Pc_TC128078 | -3.83 | 0.04  | Down | -2.85 | 0.11      |      | -0.82 | 0.63 |      | -0.82 | 0.55  |      | Expressed protein                                           |
| Pc_TC128100 | -0.46 | 0.63  |      | 0.1   | 0.95      |      | -0.69 | 0.61 |      | -3.79 | 0     | Down | Expressed protein                                           |
| Pc_TC128115 | -2.3  | 0.01  | Down | -1.32 | 0.17      |      | 1.74  | 0.11 |      | 0.45  | 0.59  |      | Expressed protein                                           |
| Pc_TC128132 | -4.13 | 0     | Down | -1.83 | 0.1       |      | 0.38  | 0.77 |      | -1.34 | 0.19  |      | Expressed protein                                           |
| Pc_TC128134 | 2.35  | 0     | Up   | 0     | 9.94E-005 |      | 1.72  | 0.13 |      | 0.18  | 0.86  |      | vacuolar ATP synthase subunit D (VATD) / V-ATPase D subunit |
| Pc_TC128159 | -1.16 | 0.23  |      | -2.99 | 0.02      | Down | 1.32  | 0.26 |      | 0.46  | 0.62  |      | Expressed protein                                           |
| Pc_TC128167 | 1.49  | 0     | Up   | 0.9   | 0.12      |      | -0.16 | 0.87 |      | 1.04  | 0.09  |      | Putative uncharacterized protein                            |
| Pc_TC128176 | 3.27  | ##### | Up   | 0     | 0.01      |      | 2.82  | 0.02 | Up   | 2.87  | 0     | Up   | Expressed protein                                           |
| Pc_TC128182 | -0.73 | 0.47  |      | -2.75 | 0.04      | Down | 0.45  | 0.74 |      | 0.07  | 0.98  |      | Uncharacterized protein                                     |
| Pc_TC128192 | -0.94 | 0.17  |      | 0.17  | 0.83      |      | -3.51 | 0.01 | Down | -1.39 | 0.09  |      | Expressed protein                                           |

|             |       |       |      |  |       |           |      |  |       |      |      |       |      |      |                                                  |
|-------------|-------|-------|------|--|-------|-----------|------|--|-------|------|------|-------|------|------|--------------------------------------------------|
| Pc_TC128193 | 0.14  | 0.79  |      |  | -0.29 | 0.65      |      |  | -1.6  | 0.13 |      | -1.46 | 0.04 | Down | Expressed protein                                |
| Pc_TC128199 | -0.92 | 0.39  |      |  | -0.28 | 0.84      |      |  | 2.55  | 0.03 | Up   | 0.66  | 0.51 |      | Uncharacterized protein                          |
| Pc_TC128209 | -2.01 | 0.15  |      |  | 0.43  | 0.74      |      |  | -1.78 | 0.28 |      | -3.46 | 0.03 | Down | Expressed protein                                |
| Pc_TC128247 | 0.34  | 0.76  |      |  | 0.26  | 0.85      |      |  | -3.82 | 0.04 | Down | -2.37 | 0.08 |      | Expressed protein                                |
| Pc_TC128254 | 1.22  | 0.27  |      |  | 2.8   | 0         | Up   |  | -1.82 | 0.37 |      | -1.11 | 0.51 |      | Expressed protein                                |
| Pc_TC128257 | 0     | 0     |      |  | -1.16 | 0.37      |      |  | 0     | 0.01 |      | -3.77 | 0.01 | Down | Uncharacterized protein                          |
| Pc_TC128275 | 1.41  | 0.05  |      |  | 1.66  | 0.04      | Up   |  | -0.79 | 0.56 |      | -1.51 | 0.15 |      | Expressed protein                                |
| Pc_TC128277 | 0.21  | 0.76  |      |  | 0.42  | 0.58      |      |  | -2.72 | 0.03 | Down | -2.86 | 0    | Down | Uncharacterized protein                          |
| Pc_TC128278 | 0.53  | 0.31  |      |  | 0.93  | 0.12      |      |  | -1.83 | 0.09 |      | -2.52 | 0    | Down | Uncharacterized protein                          |
| Pc_TC128300 | -0.18 | 0.9   |      |  | 0.38  | 0.73      |      |  | -2.08 | 0.18 |      | -3.96 | 0.01 | Down | Expressed protein                                |
| Pc_TC128311 | -3.73 | 0.05  | Down |  | -0.16 | 0.96      |      |  | -1.98 | 0.27 |      | -0.48 | 0.75 |      | Expressed protein                                |
| Pc_TC128318 | -0.71 | 0.46  |      |  | 1.39  | 0.1       |      |  | -5.45 | 0.01 | Down | -5.33 | 0    | Down | pleiotropic drug resistance 9                    |
| Pc_TC128346 | 1.73  | 0.01  | Up   |  | 0     | 0         |      |  | 1.39  | 0.22 |      | 0.4   | 0.65 |      | Expressed protein                                |
| Pc_TC128347 | 0.66  | 0.3   |      |  | 0.77  | 0.3       |      |  | -2.96 | 0.02 | Down | -1.18 | 0.16 |      | Expressed protein                                |
| Pc_TC128398 | 1.47  | 0.2   |      |  | 0.76  | 0.63      |      |  | 2.96  | 0.03 | Up   | 1.83  | 0.11 |      | Expressed protein                                |
| Pc_TC128408 | -1.48 | 0.09  |      |  | -2.69 | 0.02      | Down |  | 0.7   | 0.55 |      | 0.58  | 0.49 |      | Expressed protein                                |
| Pc_TC128416 | 1.78  | 0.23  |      |  | 0     | 0.36      |      |  | 3.12  | 0.05 | Up   | 2.48  | 0.07 |      | Expressed protein                                |
| Pc_TC128421 | -0.61 | 0.6   |      |  | 0.31  | 0.81      |      |  | -1.3  | 0.39 |      | -3.18 | 0.03 | Down | BREAST CANCER 2 like 2A                          |
| Pc_TC128452 | 1.66  | 0.28  |      |  | -0.94 | 0.84      |      |  | 2.26  | 0.19 |      | 2.71  | 0.04 | Up   | Expressed protein                                |
| Pc_TC128453 | -0.35 | 0.71  |      |  | 1.21  | 0.15      |      |  | -3.63 | 0.02 | Down | -3.92 | 0    | Down | Expressed protein                                |
| Pc_TC128493 | -1.76 | 0.12  |      |  | -2.59 | 0.06      |      |  | 2.65  | 0.02 | Up   | 2.15  | 0.01 | Up   | Expressed protein                                |
| Pc_TC128532 | -1.51 | 0.11  |      |  | 1.17  | 0.16      |      |  | -0.88 | 0.5  |      | -3.08 | 0.01 | Down | Expressed protein                                |
| Pc_TC128539 | 0.27  | 0.63  |      |  | 0.6   | 0.36      |      |  | -2.07 | 0.07 |      | -1.87 | 0.02 | Down | Expressed protein                                |
| Pc_TC128540 | 1.93  | 0.14  |      |  | 2.78  | 0.02      | Up   |  | -1.23 | 0.68 |      | 0.76  | 0.7  |      | Expressed protein                                |
| Pc_TC128542 | 1.32  | 0.05  | Up   |  | 0.2   | 0.84      |      |  | 0.53  | 0.65 |      | 1.43  | 0.06 |      | Expressed protein                                |
| Pc_TC128549 | -1.16 | 0.23  |      |  | -2.99 | 0.02      | Down |  | -1.45 | 0.29 |      | -0.72 | 0.48 |      | Uncharacterized protein                          |
| Pc_TC128566 | 1.82  | 0.14  |      |  | 2.64  | 0.03      | Up   |  | 0.24  | 0.98 |      | 1.74  | 0.18 |      | Uncharacterized protein                          |
| Pc_TC128570 | 0.12  | 0.88  |      |  | 1.53  | 0.03      | Up   |  | -3.33 | 0.01 | Down | -0.98 | 0.25 |      | Expressed protein                                |
| Pc_TC128571 | -0.69 | 0.48  |      |  | -2.8  | 0.03      | Down |  | -0.65 | 0.64 |      | -0.53 | 0.62 |      | Expressed protein                                |
| Pc_TC128575 | 1.66  | 0.36  |      |  | 0.47  | 0.98      |      |  | 3.53  | 0.03 | Up   | 1.21  | 0.58 |      | Expressed protein                                |
| Pc_TC128581 | -0.08 | 0.93  |      |  | 0.75  | 0.31      |      |  | -4.2  | 0    | Down | -1.02 | 0.22 |      | Expressed protein                                |
| Pc_TC128585 | 1.82  | 0.04  | Up   |  | 1.77  | 0.07      |      |  | -0.01 | 1    |      | 0.97  | 0.37 |      | Expressed protein                                |
| Pc_TC128587 | 0.86  | 0.25  |      |  | 1.68  | 0.04      | Up   |  | -1.67 | 0.22 |      | -0.26 | 0.81 |      | Expressed protein                                |
| Pc_TC128591 | 0.77  | 0.32  |      |  | 1.73  | 0.03      | Up   |  | 0.5   | 0.69 |      | -0.42 | 0.68 |      | Expressed protein                                |
| Pc_TC128622 | 1.14  | 0.29  |      |  | 2.35  | 0.02      | Up   |  | -2.37 | 0.25 |      | -0.83 | 0.6  |      | Expressed protein                                |
| Pc_TC128630 | 0.48  | 0.51  |      |  | 1.63  | 0.03      | Up   |  | -0.75 | 0.55 |      | -1.7  | 0.08 |      | Uncharacterized protein                          |
| Pc_TC128640 | -1.75 | 0.03  | Down |  | -1.48 | 0.1       |      |  | -2.59 | 0.05 | Down | -3.2  | 0    | Down | putative CACTA,En/Spm sub-class                  |
| Pc_TC128641 | 1.08  | 0.77  |      |  | 0.64  | 0.98      |      |  | 4.09  | 0.02 | Up   | 2.21  | 0.26 |      | Putative uncharacterized protein                 |
| Pc_TC128647 | 0.11  | 0.88  |      |  | 0.45  | 0.54      |      |  | -2.75 | 0.03 | Down | -2.16 | 0.01 | Down | Expressed protein                                |
| Pc_TC128687 | 0.64  | 0.48  |      |  | 0.53  | 0.62      |      |  | -1.32 | 0.37 |      | -4.9  | 0    | Down | Expressed protein                                |
| Pc_TC128691 | -1.51 | 0.24  |      |  | -1.53 | 0.28      |      |  | -2.67 | 0.13 |      | -3.54 | 0.03 | Down | annexin 2                                        |
| Pc_TC128697 | 1.66  | 0.02  | Up   |  | 1.45  | 0.09      |      |  | -1.9  | 0.19 |      | -0.65 | 0.54 |      | Expressed protein                                |
| Pc_TC128706 | -1.88 | 0.06  |      |  | -0.16 | 0.9       |      |  | -2.17 | 0.13 |      | -2.5  | 0.03 | Down | Expressed protein                                |
| Pc_TC128719 | -1.71 | 0.04  | Down |  | -2.09 | 0.03      | Down |  | 0.91  | 0.41 |      | -0.57 | 0.5  |      | Expressed protein                                |
| Pc_TC128725 | -1.32 | 0.2   |      |  | -0.71 | 0.52      |      |  | -3.03 | 0.05 |      | -2.43 | 0.04 | Down | Expressed protein                                |
| Pc_TC128726 | 0.45  | 0.6   |      |  | 2.14  | 0.01      | Up   |  | 0     | 0    |      | -2.52 | 0.03 | Down | Os11g0133200 protein                             |
| Pc_TC128731 | -0.08 | 0.97  |      |  | 1.18  | 0.19      |      |  | -0.06 | 0.99 |      | -3.18 | 0.01 | Down | Expressed protein                                |
| Pc_TC128757 | -0.06 | 0.9   |      |  | -2.18 | 0         | Down |  | -1.03 | 0.3  |      | -1.75 | 0.01 | Down | Uncharacterized protein                          |
| Pc_TC128758 | 1.51  | 0.01  | Up   |  | 2.6   | 4.46E-005 | Up   |  | -0.85 | 0.46 |      | -0.01 | 1    |      | Uncharacterized protein                          |
| Pc_TC128759 | -1.62 | 0.02  | Down |  | -0.22 | 0.76      |      |  | -0.92 | 0.4  |      | -1.47 | 0.06 |      | Expressed protein                                |
| Pc_TC128773 | 2.4   | 0.19  |      |  | 1.06  | 0.8       |      |  | 4.2   | 0.01 | Up   | 3.21  | 0.04 | Up   | Expressed protein                                |
| Pc_TC128775 | -0.38 | 0.75  |      |  | 0.46  | 0.68      |      |  | 2.6   | 0.03 | Up   | 0.63  | 0.54 |      | Expressed protein                                |
| Pc_TC128783 | 0.18  | 0.81  |      |  | 0.22  | 0.79      |      |  | -3.56 | 0.01 | Down | -2.63 | 0.01 | Down | Expressed protein                                |
| Pc_TC128787 | 2.43  | 0.01  | Up   |  | 0     | 0.09      |      |  | 0.86  | 0.61 |      | -0.96 | 0.59 |      | Cytochrome P450 superfamily protein              |
| Pc_TC128788 | 2.46  | ##### | Up   |  | 0     | 9.45E-008 |      |  | 1.33  | 0.2  |      | 0.9   | 0.21 |      | cytochrome P450 polypeptide 1                    |
| Pc_TC128800 | -1.75 | 0.01  | Down |  | -0.69 | 0.35      |      |  | -0.97 | 0.38 |      | -1.59 | 0.04 | Down | Putative uncharacterized protein                 |
| Pc_TC128811 | -0.11 | 0.84  |      |  | 0.66  | 0.28      |      |  | -2.42 | 0.03 | Down | -0.4  | 0.55 |      | Major facilitator superfamily protein            |
| Pc_TC128838 | 0.59  | 0.53  |      |  | 0.57  | 0.6       |      |  | 1.68  | 0.17 |      | 1.97  | 0.02 | Up   | Expressed protein                                |
| Pc_TC128868 | 3.25  | 0.03  | Up   |  | 2.52  | 0.2       |      |  | 1.09  | 0.77 |      | 2.8   | 0.1  |      | Expressed protein                                |
| Pc_TC128876 | -0.72 | 0.31  |      |  | 0.67  | 0.37      |      |  | -2.57 | 0.04 | Down | -1.89 | 0.03 | Down | Expressed protein                                |
| Pc_TC128909 | 3.17  | 0     | Up   |  | 0     | 0.2       |      |  | 2.8   | 0.05 |      | 1.29  | 0.37 |      | NAD(P)-binding Rossmann-fold superfamily protein |
| Pc_TC128917 | 3.83  | 0     | Up   |  | 0     | 0.67      |      |  | 2.96  | 0.14 |      | 0.63  | 0.96 |      | TCP-1/cpn60 chaperonin family protein            |

|             |       |       |      |  |       |           |      |       |      |      |       |       |      |                                                 |
|-------------|-------|-------|------|--|-------|-----------|------|-------|------|------|-------|-------|------|-------------------------------------------------|
| Pc_TC128921 | 0.33  | 0.67  |      |  | -2.2  | 0.04      | Down | 0.44  | 0.71 |      | -0.44 | 0.63  |      | Expressed protein                               |
| Pc_TC128930 | -0.94 | 0.21  |      |  | -1.96 | 0.03      | Down | 1.59  | 0.14 |      | 0.22  | 0.8   |      | ILITYHIA                                        |
| Pc_TC128931 | -1.37 | 0.13  |      |  | -3.3  | 0.01      | Down | -0.07 | 0.97 |      | 0.48  | 0.59  |      | ILITYHIA                                        |
| Pc_TC128962 | -2.68 | 0     | Down |  | -2.26 | 0.01      | Down | 3.27  | 0    | Up   | 1.75  | 0.01  | Up   | Uncharacterized protein (Fragment)              |
| Pc_TC128963 | -3.3  | 0     | Down |  | -0.25 | 0.76      |      | -2.35 | 0.06 |      | -2.5  | 0.01  | Down | Expressed protein                               |
| Pc_TC128966 | -0.41 | 0.91  |      |  | 2.77  | 0.01      | Up   | -0.5  | 0.87 |      | -3.18 | 0.19  |      | heat shock protein 70B                          |
| Pc_TC128976 | -3.24 | 0.03  | Down |  | -1.94 | 0.17      |      | -0.82 | 0.59 |      | -1.7  | 0.18  |      | Expressed protein                               |
| Pc_TC128992 | 0.84  | 0.22  |      |  | 0.2   | 0.84      |      | -3.56 | 0.01 | Down | -2.7  | 0.01  | Down | Expressed protein                               |
| Pc_TC128996 | 0.34  | 0.8   |      |  | 1.28  | 0.23      |      | -0.82 | 0.63 |      | 2.02  | 0.03  | Up   | Expressed protein                               |
| Pc_TC129013 | 0.79  | 0.51  |      |  | 1.35  | 0.24      |      | 1.83  | 0.19 |      | 2.05  | 0.05  | Up   | Expressed protein                               |
| Pc_TC129016 | 2.51  | 0.03  | Up   |  | 0     | 0.27      |      | 1.57  | 0.37 |      | -0.11 | 1     |      | Expressed protein                               |
| Pc_TC129025 | 1.13  | 0.15  |      |  | -0.25 | 0.85      |      | -1.88 | 0.21 |      | -2.49 | 0.04  | Down | Expressed protein                               |
| Pc_TC129047 | 0.25  | 0.79  |      |  | 0.31  | 0.77      |      | -0.99 | 0.47 |      | -2.74 | 0.02  | Down | Expressed protein                               |
| Pc_TC129049 | -3.51 | 0.01  | Down |  | -2.2  | 0.1       |      | 1.95  | 0.1  |      | 1.21  | 0.18  |      | Expressed protein                               |
| Pc_TC129059 | 0.12  | 0.92  |      |  | 0.63  | 0.48      |      | 2.41  | 0.03 | Up   | 1.52  | 0.06  |      | Expressed protein                               |
| Pc_TC129063 | 1.02  | 0.14  |      |  | 1.71  | 0.02      | Up   | -1.44 | 0.26 |      | -0.18 | 0.86  |      | Expressed protein                               |
| Pc_TC129064 | -0.44 | 0.59  |      |  | 1.6   | 0.03      | Up   | -2.44 | 0.07 |      | -2.11 | 0.03  | Down | Expressed protein                               |
| Pc_TC129067 | -0.45 | 0.36  |      |  | -2.17 | 0         | Down | 1.71  | 0.07 |      | 0.98  | 0.1   |      | Expressed protein                               |
| Pc_TC129069 | -0.71 | 0.56  |      |  | -0.6  | 0.65      |      | -1.42 | 0.37 |      | -4.62 | 0.01  | Down | Expressed protein                               |
| Pc_TC129095 | 0.72  | 0.46  |      |  | 1.53  | 0.11      |      | -3.67 | 0.06 |      | -2.96 | 0.05  | Down | Expressed protein                               |
| Pc_TC129137 | -0.18 | 0.92  |      |  | -0.3  | 0.85      |      | -0.86 | 0.59 |      | -3.54 | 0.03  | Down | Expressed protein                               |
| Pc_TC129151 | -1.38 | 0.23  |      |  | 0.46  | 0.68      |      | -4.96 | 0.02 | Down | -3.83 | 0.01  | Down | Expressed protein                               |
| Pc_TC129205 | 2.69  | 0     | Up   |  | 0     | 0.07      |      | 1.91  | 0.17 |      | 0.11  | 1     |      | Expressed protein                               |
| Pc_TC129211 | -0.22 | 0.8   |      |  | 0.15  | 0.89      |      | 2.19  | 0.05 | Up   | 1.23  | 0.12  |      | Expressed protein                               |
| Pc_TC129220 | 0     | 0     |      |  | -3.19 | 0.05      |      | -2.74 | 0.11 |      | -3.04 | 0.04  | Down | Expressed protein                               |
| Pc_TC129229 | 1.24  | 0.17  |      |  | 2.57  | 0         | Up   | -1.58 | 0.33 |      | -2.14 | 0.13  |      | Expressed protein                               |
| Pc_TC129230 | -1.52 | 0.03  | Down |  | -0.74 | 0.35      |      | 0.26  | 0.82 |      | 0.01  | 1     |      | Expressed protein                               |
| Pc_TC129249 | -0.75 | 0.57  |      |  | 0.58  | 0.63      |      | -4.5  | 0.04 | Down | -0.67 | 0.62  |      | Expressed protein                               |
| Pc_TC129253 | 0.08  | 0.98  |      |  | 0.55  | 0.58      |      | -3.25 | 0.05 | Down | 0     | 0     |      | Expressed protein                               |
| Pc_TC129261 | 2.53  | 0     | Up   |  | 0     | 0.03      |      | 1.58  | 0.24 |      | 0.63  | 0.61  |      | type one serine/threonine protein phosphatase 3 |
| Pc_TC129265 | 0.65  | 0.44  |      |  | 0.2   | 0.87      |      | -4.35 | 0.01 | Down | -4.23 | 0     | Down | Expressed protein                               |
| Pc_TC129278 | 3.08  | 0.05  | Up   |  | 1.06  | 0.8       |      | -0.5  | 1    |      | -1.37 | 0.88  |      | Expressed protein                               |
| Pc_TC129288 | 0     | 0     |      |  | -3.53 | 0.02      | Down | -4.08 | 0.03 | Down | 0     | 0     |      | Ribosomal protein L35Ae family protein          |
| Pc_TC129308 | -0.66 | 0.72  |      |  | 2.16  | 0.04      | Up   | -1.23 | 0.53 |      | -2.11 | 0.24  |      | Expressed protein                               |
| Pc_TC129322 | 3.25  | 0.14  |      |  | 4.31  | 0.02      | Up   | 0.5   | 1    |      | 2.21  | 0.47  |      | Expressed protein                               |
| Pc_TC129329 | 0.33  | 0.46  |      |  | 0.15  | 0.79      |      | -3.54 | 0    | Down | -1.27 | 0.05  |      | Expressed protein                               |
| Pc_TC129330 | 1.83  | 0.03  | Up   |  | 1.38  | 0.18      |      | -1.69 | 0.32 |      | -0.47 | 0.74  |      | Uncharacterized protein                         |
| Pc_TC129342 | 3.21  | 0     | Up   |  | 0     | 0.11      |      | 3.62  | 0.01 | Up   | 2.3   | 0.04  | Up   | Expressed protein                               |
| Pc_TC129352 | -0.19 | 0.69  |      |  | -1.4  | 0.03      | Down | 0.59  | 0.54 |      | 0.7   | 0.25  |      | Expressed protein                               |
| Pc_TC129354 | -0.16 | 0.94  |      |  | 0.54  | 0.63      |      | -4.82 | 0.02 | Down | -1.37 | 0.27  |      | Expressed protein                               |
| Pc_TC129362 | 1.53  | 0     | Up   |  | 0     | 1.49E-013 |      | 1.15  | 0.23 |      | -0.29 | 0.66  |      | ribosomal protein L23AB                         |
| Pc_TC129382 | 4.33  | 0.01  | Up   |  | 3.52  | 0.11      |      | 4.09  | 0.06 |      | 3.8   | 0.05  |      | Expressed protein                               |
| Pc_TC129400 | -0.13 | 0.76  |      |  | -0.12 | 0.82      |      | -1.96 | 0.05 | Down | -1.03 | 0.09  |      | Expressed protein                               |
| Pc_TC129407 | -1.28 | 0.31  |      |  | 0.21  | 0.9       |      | 0     | 0.01 |      | -3.54 | 0.03  | Down | Uncharacterized protein                         |
| Pc_TC129433 | -0.87 | 0.17  |      |  | 1.48  | 0.02      | Up   | -4.11 | 0    | Down | -0.37 | 0.61  |      | Expressed protein                               |
| Pc_TC129437 | 0.34  | 0.65  |      |  | 1.81  | 0.01      | Up   | -0.65 | 0.6  |      | 0.32  | 0.71  |      | Expressed protein                               |
| Pc_TC129471 | -0.04 | 0.98  |      |  | 0.3   | 0.7       |      | -3.29 | 0.01 | Down | -2.54 | 0.01  | Down | Expressed protein                               |
| Pc_TC129480 | 0.97  | 0.34  |      |  | -0.16 | 0.96      |      | 2.09  | 0.11 |      | 1.93  | 0.05  | Up   | Expressed protein                               |
| Pc_TC129493 | -3.69 | 0     | Down |  | 0     | 0         |      | -3.85 | 0.01 | Down | -4.73 | 0     | Down | aldehyde dehydrogenase 2B4                      |
| Pc_TC129510 | 0.4   | 0.53  |      |  | 0.26  | 0.73      |      | -3.58 | 0.01 | Down | -2.59 | 0     | Down | Putative copia-type polypeptide                 |
| Pc_TC129512 | 1.19  | 0.14  |      |  | -0.62 | 0.61      |      | 4.12  | 0    | Up   | 1.04  | 0.26  |      | Expressed protein                               |
| Pc_TC129521 | 2.42  | 0     | Up   |  | 0     | 0         |      | 1.97  | 0.08 |      | 0.08  | 0.96  |      | Expressed protein                               |
| Pc_TC129557 | 1.41  | 0.02  | Up   |  | 0     | 6.86E-006 |      | 1.28  | 0.24 |      | 0.05  | 0.97  |      | Expressed protein                               |
| Pc_TC129577 | 0.02  | 1     |      |  | 0.17  | 0.91      |      | -4.2  | 0.02 | Down | -1.27 | 0.26  |      | Expressed protein                               |
| Pc_TC129578 | -0.88 | 0.37  |      |  | -2.57 | 0.04      | Down | 0.96  | 0.43 |      | 0.37  | 0.71  |      | Expressed protein                               |
| Pc_TC129581 | -1.81 | 0.11  |      |  | -1.06 | 0.37      |      | -0.8  | 0.57 |      | -3.49 | 0.01  | Down | Expressed protein                               |
| Pc_TC129646 | 2.15  | 0     | Up   |  | 0     | 0         |      | 2.64  | 0.02 | Up   | 1.04  | 0.21  |      | Expressed protein                               |
| Pc_TC129661 | -1.11 | 0.4   |      |  | -3.94 | 0.05      | Down | 0.96  | 0.49 |      | -1.37 | 0.31  |      | S-locus lectin protein kinase family protein    |
| Pc_TC129675 | -0.24 | 0.79  |      |  | 0.06  | 0.98      |      | -2.36 | 0.09 |      | -2.53 | 0.02  | Down | Expressed protein                               |
| Pc_TC129676 | 0.89  | 0.68  |      |  | 0.38  | 0.97      |      | 3.26  | 0.04 | Up   | 0.63  | 0.82  |      | Expressed protein                               |
| Pc_TC129677 | -4.61 | ##### | Down |  | -5.19 | 7.02E-012 | Down | -0.9  | 0.35 |      | -3.72 | ##### | Down | Expressed protein                               |
| Pc_TC129698 | 0.22  | 0.64  |      |  | 0.4   | 0.49      |      | -3.94 | 0    | Down | -3.42 | ##### | Down | Uncharacterized protein                         |

|             |       |       |      |       |           |      |       |           |      |       |      |      |                                                          |
|-------------|-------|-------|------|-------|-----------|------|-------|-----------|------|-------|------|------|----------------------------------------------------------|
| Pc_TC129703 | -2.92 | 0.07  |      | 0     | 0.02      |      | -1.33 | 0.42      |      | -3.37 | 0.04 | Down | Expressed protein                                        |
| Pc_TC129706 | 1.73  | 0     | Up   | 0     | 1.98E-006 |      | 1.19  | 0.27      |      | -0.35 | 0.67 |      | Ribosomal protein L36e family protein                    |
| Pc_TC129708 | 2.14  | 0     | Up   | 0     | 0         |      | 1.11  | 0.38      |      | 0.56  | 0.58 |      | eukaryotic translation initiation factor 3E              |
| Pc_TC129715 | 0.63  | 0.37  |      | 0.6   | 0.47      |      | 2.88  | 0.01      | Up   | 2.02  | 0.01 | Up   | serine carboxypeptidase-like 3                           |
| Pc_TC129717 | -0.92 | 0.17  |      | 0.7   | 0.32      |      | 2.64  | 0.01      | Up   | 1.94  | 0    | Up   | serine carboxypeptidase-like 19                          |
| Pc_TC129720 | 0.48  | 0.53  |      | 1.76  | 0.02      | Up   | -3.82 | 0.01      | Down | -2    | 0.05 |      | Expressed protein                                        |
| Pc_TC129737 | 0.31  | 0.48  |      | 0.57  | 0.29      |      | -1.76 | 0.08      |      | -1.27 | 0.05 | Down | Expressed protein                                        |
| Pc_TC129743 | -1.01 | 0.43  |      | -1.44 | 0.32      |      | -2.26 | 0.19      |      | -3.46 | 0.03 | Down | Putative polyprotein                                     |
| Pc_TC129769 | 1.09  | 0.04  | Up   | 0     | 5.99E-009 |      | 0.76  | 0.46      |      | -0.84 | 0.26 |      | 60S acidic ribosomal protein family                      |
| Pc_TC129777 | 0.57  | 0.34  |      | 0.67  | 0.34      |      | -3.11 | 0.01      | Down | -1.58 | 0.05 | Down | Expressed protein                                        |
| Pc_TC129779 | -2.73 | 0.05  | Down | 0.13  | 0.95      |      | 0.7   | 0.61      |      | -0.86 | 0.47 |      | Putative polyprotein                                     |
| Pc_TC129793 | -2.73 | 0.05  | Down | -0.53 | 0.69      |      | -2.89 | 0.09      |      | -4.77 | 0.01 | Down | Uncharacterized protein                                  |
| Pc_TC129819 | 0.97  | 0.16  |      | 1.57  | 0.04      | Up   | -1.56 | 0.22      |      | -0.83 | 0.37 |      | Expressed protein                                        |
| Pc_TC129821 | -2.62 | 0.03  | Down | -1.06 | 0.37      |      | -2.88 | 0.07      |      | -2.75 | 0.03 | Down | Expressed protein                                        |
| Pc_TC129828 | -0.88 | 0.32  |      | -2.42 | 0.03      | Down | 0.12  | 0.94      |      | -1.02 | 0.3  |      | Uncharacterized protein                                  |
| Pc_TC129831 | 2.4   | 0.06  |      | 3.67  | 0         | Up   | 0     | 0.26      |      | 0     | 0.24 |      | Expressed protein                                        |
| Pc_TC129832 | 1.92  | 0.03  | Up   | 2.85  | 0         | Up   | -1.72 | 0.33      |      | -0.01 | 1    |      | magnesium transporter 2                                  |
| Pc_TC129848 | 2.44  | 0     | Up   | 0.61  | 0.62      |      | 1.12  | 0.42      |      | 0.04  | 1    |      | Expressed protein                                        |
| Pc_TC129849 | 2.34  | 0     | Up   | 0     | 0.02      |      | 2.64  | 0.04      | Up   | 1.31  | 0.21 |      | COP1-interactive protein 1                               |
| Pc_TC129867 | 0.41  | 0.55  |      | 0.77  | 0.32      |      | -2.73 | 0.04      | Down | -0.33 | 0.71 |      | Putative AP2 domain transcription factor                 |
| Pc_TC129875 | 3.31  | 0     | Up   | 0     | 0.11      |      | 2     | 0.17      |      | 0.71  | 0.64 |      | general regulatory factor 7                              |
| Pc_TC129877 | 0     | 0.09  |      | -1.94 | 0.4       |      | 2.73  | 0.05      | Up   | 1.33  | 0.29 |      | Expressed protein                                        |
| Pc_TC129880 | 0     | 0     |      | 0     | 0.01      |      | -3.74 | 0.05      | Down | 0     | 0    |      | Expressed protein                                        |
| Pc_TC129911 | -3.38 | 0.02  | Down | 0     | 0         |      | -1.37 | 0.36      |      | 0     | 0    |      | Expressed protein                                        |
| Pc_TC129918 | -0.04 | 0.99  |      | -0.4  | 0.66      |      | 2.71  | 0.01      | Up   | 1.07  | 0.17 |      | Expressed protein                                        |
| Pc_TC129920 | -2.21 | 0.02  | Down | -1.23 | 0.2       |      | 0.5   | 0.67      |      | 0.14  | 0.89 |      | Expressed protein                                        |
| Pc_TC129921 | 0.97  | 0.08  |      | 1.54  | 0.02      | Up   | -5.42 | 0         | Down | -1.44 | 0.07 |      | Expressed protein                                        |
| Pc_TC129936 | 1.18  | 0.37  |      | 2.57  | 0.02      | Up   | -0.3  | 0.95      |      | 0.82  | 0.6  |      | Monoxygenase,flavin-binding family protein               |
| Pc_TC129979 | -0.67 | 0.48  |      | -2.94 | 0.02      | Down | 1.2   | 0.31      |      | 0.02  | 1    |      | Putative uncharacterized protein                         |
| Pc_TC130000 | -0.02 | 0.98  |      | 0.06  | 0.94      |      | -1.38 | 0.21      |      | -1.91 | 0.02 | Down | Expressed protein                                        |
| Pc_TC130017 | 2.74  | 0.01  | Up   | 0     | 0.2       |      | 2.01  | 0.2       |      | 0.63  | 0.74 |      | Expressed protein                                        |
| Pc_TC130032 | -1.2  | 0.05  | Down | -2.09 | 0.01      | Down | 1.4   | 0.16      |      | 0.47  | 0.49 |      | Expressed protein                                        |
| Pc_TC130036 | 0.27  | 0.71  |      | 0.45  | 0.57      |      | -2.17 | 0.09      |      | -1.79 | 0.05 | Down | Expressed protein                                        |
| Pc_TC130038 | 0.55  | 0.5   |      | 1.27  | 0.13      |      | -3.58 | 0.02      | Down | -2.46 | 0.03 | Down | Expressed protein                                        |
| Pc_TC130048 | -3.45 | 0.02  | Down | -1.14 | 0.36      |      | -0.38 | 0.81      |      | -1.2  | 0.3  |      | Expressed protein                                        |
| Pc_TC130052 | 0.31  | 0.53  |      | 0.08  | 0.9       |      | -1.42 | 0.17      |      | -1.36 | 0.05 | Down | Expressed protein                                        |
| Pc_TC130055 | 2     | 0.02  | Up   | 0     | 0.02      |      | 0.45  | 0.79      |      | 0.14  | 0.96 |      | Expressed protein                                        |
| Pc_TC130057 | -2.86 | 0.03  | Down | -1.66 | 0.2       |      | -5.02 | 0.01      | Down | -4.9  | 0    | Down | Expressed protein                                        |
| Pc_TC130063 | 0.04  | 0.98  |      | 0.36  | 0.65      |      | -2.26 | 0.07      |      | -2.21 | 0.02 | Down | Expressed protein                                        |
| Pc_TC130068 | 1.82  | 0.03  | Up   | 0.06  | 1         |      | 2.93  | 0.01      | Up   | -0.74 | 0.56 |      | FRS (FAR1 Related Sequences) transcription factor family |
| Pc_TC130069 | -1.48 | 0.02  | Down | -1.23 | 0.09      |      | -0.63 | 0.55      |      | -0.28 | 0.7  |      | FRS (FAR1 Related Sequences) transcription factor family |
| Pc_TC130071 | -3.43 | ##### | Down | -1.93 | 0.03      | Down | 0.53  | 0.62      |      | -0.11 | 0.89 |      | FRS (FAR1 Related Sequences) transcription factor family |
| Pc_TC130096 | 0     | 1     |      | 0.51  | 0.57      |      | -4.74 | 0.01      | Down | -2.3  | 0.03 | Down | Expressed protein                                        |
| Pc_TC130107 | -0.34 | 0.93  |      | -0.13 | 1         |      | 4.2   | 0         | Up   | 3.34  | 0    | Up   | Expressed protein                                        |
| Pc_TC130117 | -0.51 | 0.67  |      | 0.8   | 0.44      |      | -2.57 | 0.12      |      | -2.77 | 0.04 | Down | Expressed protein                                        |
| Pc_TC130119 | -3.17 | 0.04  | Down | -4.19 | 0.03      | Down | 1.23  | 0.34      |      | -0.54 | 0.67 |      | Putative uncharacterized protein OSJNBb0115F21.5         |
| Pc_TC130165 | 0.74  | 0.13  |      | 0.19  | 0.76      |      | 2.4   | 0.01      | Up   | 1.99  | 0    | Up   | Expressed protein                                        |
| Pc_TC130182 | 0.65  | 0.36  |      | 0.8   | 0.32      |      | -5.11 | 0         | Down | -3.99 | 0    | Down | Expressed protein                                        |
| Pc_TC130185 | 0.06  | 0.95  |      | 0.63  | 0.4       |      | 0     | 3.25E-005 |      | -2.23 | 0.01 | Down | Expressed protein                                        |
| Pc_TC130188 | 1.85  | 0     | Up   | 0     | 2.64E-005 |      | 1.75  | 0.11      |      | -0.32 | 0.73 |      | Ribosomal protein L39 family protein                     |
| Pc_TC130195 | 0.63  | 0.47  |      | 0.78  | 0.42      |      | -4.2  | 0.02      | Down | -3.08 | 0.02 | Down | Expressed protein                                        |
| Pc_TC130202 | 0.34  | 0.76  |      | -0.56 | 0.67      |      | 0     | 0.01      |      | -3.7  | 0.02 | Down | Expressed protein                                        |
| Pc_TC130220 | 0.94  | 0.12  |      | 0     | 5.59E-007 |      | 0.17  | 0.89      |      | -1.75 | 0.04 | Down | aminopeptidase M1                                        |
| Pc_TC130221 | -0.73 | 0.53  |      | 1.95  | 0.03      | Up   | -0.64 | 0.67      |      | 0.48  | 0.66 |      | Uncharacterized protein                                  |
| Pc_TC130228 | -0.79 | 0.41  |      | 0.01  | 1         |      | -2.28 | 0.12      |      | -3.01 | 0.01 | Down | Os07g0537900 protein                                     |
| Pc_TC130238 | -0.18 | 0.88  |      | 1.17  | 0.18      |      | -2.6  | 0.09      |      | -2.7  | 0.03 | Down | Expressed protein                                        |
| Pc_TC130250 | 1.06  | 0.08  |      | 0.74  | 0.32      |      | -3.16 | 0.02      | Down | 0.08  | 0.94 |      | Expressed protein                                        |
| Pc_TC130263 | 0.6   | 0.42  |      | 1.02  | 0.22      |      | -4.85 | 0         | Down | -2.03 | 0.05 | Down | Expressed protein                                        |
| Pc_TC130264 | 1.96  | 0.01  | Up   | 1.57  | 0.07      |      | -1.03 | 0.47      |      | 1.48  | 0.09 |      | Expressed protein                                        |
| Pc_TC130265 | -1.16 | 0.01  | Down | -1.1  | 0.05      |      | 0.27  | 0.77      |      | -1.13 | 0.06 |      | cysteine-rich RLK (RECEPTOR-like protein kinase) 8       |
| Pc_TC130274 | 0     | 1     |      | -0.06 | 0.91      |      | -4.63 | 3.05E-005 | Down | -2.01 | 0    | Down | Expressed protein                                        |
| Pc_TC130277 | 0.12  | 0.88  |      | 0.67  | 0.38      |      | -3.73 | 0.01      | Down | -2.83 | 0    | Down | Putative uncharacterized protein OJ1537 B05.10           |

|             |       |      |      |  |       |           |      |  |       |      |      |       |       |      |                                                         |
|-------------|-------|------|------|--|-------|-----------|------|--|-------|------|------|-------|-------|------|---------------------------------------------------------|
| Pc_TC130291 | -1.51 | 0.34 |      |  | -2.53 | 0.19      |      |  | 2.55  | 0.05 | Up   | 1.36  | 0.21  |      | Expressed protein                                       |
| Pc_TC130300 | 1.71  | 0.08 |      |  | -3.4  | 0.13      |      |  | 2.96  | 0.02 | Up   | 1.92  | 0.06  |      | Expressed protein                                       |
| Pc_TC130319 | 0     | 1    |      |  | 0.34  | 0.69      |      |  | -0.11 | 0.94 |      | -1.93 | 0.04  | Down | Expressed protein                                       |
| Pc_TC130323 | 1.84  | 0    | Up   |  | 0     | 5.01E-007 |      |  | 2.43  | 0.02 | Up   | 0.44  | 0.56  |      | Expressed protein                                       |
| Pc_TC130331 | 0.46  | 0.77 |      |  | -0.09 | 1         |      |  | 2.72  | 0.04 | Up   | 1.21  | 0.31  |      | Expressed protein                                       |
| Pc_TC130333 | 0.29  | 0.71 |      |  | 1.53  | 0.04      | Up   |  | 0     | 0    |      | -6.02 | ##### | Down | Expressed protein                                       |
| Pc_TC130335 | -0.18 | 0.81 |      |  | 0.09  | 0.92      |      |  | -3.63 | 0.01 | Down | -1.29 | 0.12  |      | Expressed protein                                       |
| Pc_TC130344 | 1.63  | 0.08 |      |  | 2.68  | 0         | Up   |  | -3.2  | 0.12 |      | 0.25  | 0.89  |      | Expressed protein                                       |
| Pc_TC130345 | 0.19  | 0.79 |      |  | 0.69  | 0.35      |      |  | -1.94 | 0.11 |      | -1.72 | 0.05  | Down | Expressed protein                                       |
| Pc_TC130350 | -2.24 | 0.04 | Down |  | -0.85 | 0.44      |      |  | 0.66  | 0.6  |      | -1.37 | 0.2   |      | Expressed protein                                       |
| Pc_TC130353 | 0.47  | 0.52 |      |  | -0.55 | 0.55      |      |  | 0.57  | 0.62 |      | 2.03  | 0.01  | Up   | Expressed protein                                       |
| Pc_TC130358 | 2.76  | 0    | Up   |  | 2.29  | 0.03      | Up   |  | 1.35  | 0.36 |      | -1.7  | 0.32  |      | Expressed protein                                       |
| Pc_TC130383 | -1.96 | 0.04 | Down |  | -2.98 | 0.01      | Down |  | 0.17  | 0.91 |      | 0.13  | 0.91  |      | Expressed protein                                       |
| Pc_TC130387 | 2.28  | 0.01 | Up   |  | 0     | 0.07      |      |  | 2.18  | 0.11 |      | 1.7   | 0.12  |      | Expressed protein                                       |
| Pc_TC130393 | -3.38 | 0.02 | Down |  | -1.23 | 0.33      |      |  | 0.8   | 0.55 |      | -0.51 | 0.67  |      | Expressed protein                                       |
| Pc_TC130403 | -2.51 | 0.08 |      |  | -3.11 | 0.06      |      |  | -3.08 | 0.09 |      | -2.96 | 0.05  | Down | Expressed protein                                       |
| Pc_TC130409 | 0.71  | 0.39 |      |  | 1.77  | 0.03      | Up   |  | -2.55 | 0.09 |      | -1.33 | 0.22  |      | Expressed protein                                       |
| Pc_TC130413 | 0.49  | 0.83 |      |  | 0.8   | 0.67      |      |  | 4.88  | 0    | Up   | 2.77  | 0.01  | Up   | Expressed protein                                       |
| Pc_TC130420 | -1.68 | 0    | Down |  | -1.17 | 0.08      |      |  | 0.61  | 0.54 |      | -0.85 | 0.21  |      | unknown protein                                         |
| Pc_TC130426 | 2.66  | 0    | Up   |  | 0     | 0.07      |      |  | 1.04  | 0.5  |      | 0.55  | 0.71  |      | Expressed protein                                       |
| Pc_TC130438 | 1.67  | 0    | Up   |  | 0     | 1.14E-013 |      |  | 1.31  | 0.17 |      | -0.44 | 0.51  |      | Ribosomal protein L2 family                             |
| Pc_TC130455 | -2.88 | 0.01 | Down |  | -1.31 | 0.24      |      |  | -0.54 | 0.69 |      | -2.16 | 0.06  |      | Expressed protein                                       |
| Pc_TC130464 | 0.37  | 0.56 |      |  | 0.33  | 0.67      |      |  | -4.15 | 0    | Down | -0.79 | 0.32  |      | FAR1-related sequence 7                                 |
| Pc_TC130465 | -1.23 | 0.05 | Down |  | -0.84 | 0.23      |      |  | -0.64 | 0.55 |      | -0.48 | 0.5   |      | Expressed protein                                       |
| Pc_TC130466 | -0.99 | 0.39 |      |  | -0.75 | 0.56      |      |  | -1.08 | 0.47 |      | -3.18 | 0.03  | Down | Expressed protein                                       |
| Pc_TC130483 | -1.47 | 0.12 |      |  | -1.19 | 0.25      |      |  | -0.35 | 0.79 |      | -2.45 | 0.03  | Down | Expressed protein                                       |
| Pc_TC130490 | 0.43  | 0.36 |      |  | 0.42  | 0.47      |      |  | -2.71 | 0.01 | Down | -1.9  | 0.01  | Down | Expressed protein                                       |
| Pc_TC130491 | 0.14  | 0.8  |      |  | 0.22  | 0.72      |      |  | -1.4  | 0.18 |      | -1.52 | 0.03  | Down | Expressed protein                                       |
| Pc_TC130497 | -3.73 | 0.05 | Down |  | 0     | 0.02      |      |  | 0.02  | 1    |      | -0.37 | 0.81  |      | Expressed protein                                       |
| Pc_TC130504 | -0.96 | 0.29 |      |  | 0.78  | 0.37      |      |  | -3.12 | 0.04 | Down | -2.58 | 0.02  | Down | Expressed protein                                       |
| Pc_TC130510 | -0.31 | 0.41 |      |  | -0.14 | 0.77      |      |  | 1.69  | 0.05 | Up   | 1.02  | 0.05  | Up   | ribulose biphosphate carboxylase small chain 1A         |
| Pc_TC130512 | -2.32 | 0.02 | Down |  | -4.15 | 0         | Down |  | 0.22  | 0.87 |      | -5.58 | 0     | Down | Expressed protein                                       |
| Pc_TC130513 | 0.47  | 0.65 |      |  | -0.38 | 0.79      |      |  | 2.71  | 0.02 | Up   | 0.77  | 0.46  |      | nudix hydrolase homolog 3                               |
| Pc_TC130535 | 1.13  | 0    | Up   |  | 0     | 3.76E-027 |      |  | 1.12  | 0.19 |      | 0.03  | 0.96  |      | Expressed protein                                       |
| Pc_TC130540 | 2.76  | 0.01 | Up   |  | 0     | 0.27      |      |  | 1.94  | 0.25 |      | 0.76  | 0.7   |      | signal peptide peptidase                                |
| Pc_TC130552 | -0.03 | 1    |      |  | 0.01  | 1         |      |  | 3.22  | 0    | Up   | 1.52  | 0.08  |      | Expressed protein                                       |
| Pc_TC130563 | -0.87 | 0.38 |      |  | 0.93  | 0.31      |      |  | -3.77 | 0.02 | Down | -2.23 | 0.06  |      | Expressed protein                                       |
| Pc_TC130577 | 0.9   | 0.12 |      |  | 0.87  | 0.2       |      |  | -2.68 | 0.03 | Down | -0.97 | 0.21  |      | Expressed protein                                       |
| Pc_TC130582 | 0.34  | 0.58 |      |  | 1.31  | 0.05      | Up   |  | -3.33 | 0.01 | Down | -3.03 | 0     | Down | Expressed protein                                       |
| Pc_TC130604 | 0.91  | 0.22 |      |  | 0.72  | 0.42      |      |  | 1.22  | 0.3  |      | -2.22 | 0.04  | Down | Expressed protein                                       |
| Pc_TC130606 | 1.54  | 0.18 |      |  | 0.52  | 0.78      |      |  | 2.34  | 0.1  |      | 2.78  | 0.01  | Up   | Uncharacterized protein                                 |
| Pc_TC130616 | 0.21  | 0.81 |      |  | 0.78  | 0.35      |      |  | -1.53 | 0.24 |      | -2.8  | 0.01  | Down | Expressed protein                                       |
| Pc_TC130628 | 0.63  | 0.34 |      |  | 0.54  | 0.49      |      |  | -1.73 | 0.16 |      | -1.78 | 0.05  | Down | Expressed protein                                       |
| Pc_TC130635 | 0.4   | 0.71 |      |  | -0.94 | 0.47      |      |  | 3.47  | 0    | Up   | 2     | 0.02  | Up   | Expressed protein                                       |
| Pc_TC130642 | -0.88 | 0.37 |      |  | -1.44 | 0.2       |      |  | 3.33  | 0    | Up   | 1.86  | 0.02  | Up   | Expressed protein                                       |
| Pc_TC130647 | -0.92 | 0.65 |      |  | 0.64  | 0.71      |      |  | 2.88  | 0.04 | Up   | 1.8   | 0.12  |      | Expressed protein                                       |
| Pc_TC130653 | -1.24 | 0.37 |      |  | 1.28  | 0.23      |      |  | -4.4  | 0.05 | Down | -0.47 | 0.74  |      | Expressed protein                                       |
| Pc_TC130669 | -0.3  | 0.7  |      |  | -0.38 | 0.67      |      |  | 2.13  | 0.05 | Up   | 1.07  | 0.16  |      | Expressed protein                                       |
| Pc_TC130682 | 0.29  | 0.69 |      |  | 1.01  | 0.19      |      |  | -3.13 | 0.02 | Down | -0.97 | 0.27  |      | Expressed protein                                       |
| Pc_TC130689 | -0.07 | 0.91 |      |  | 0.1   | 0.9       |      |  | -2.34 | 0.04 | Down | 0.16  | 0.83  |      | DNA/RNA polymerases superfamily protein                 |
| Pc_TC130704 | -3.24 | 0    | Down |  | 0     | 0         |      |  | 3.17  | 0    | Up   | 0.71  | 0.4   |      | Expressed protein                                       |
| Pc_TC130711 | 1.52  | 0.05 | Up   |  | 2.32  | 0         | Up   |  | 0.77  | 0.55 |      | 1.3   | 0.14  |      | Expressed protein                                       |
| Pc_TC130719 | 0.03  | 0.94 |      |  | -0.01 | 0.99      |      |  | -3.36 | 0    | Down | -2.47 | ##### | Down | Expressed protein                                       |
| Pc_TC130728 | 0.68  | 0.14 |      |  | 0.94  | 0.09      |      |  | -2.06 | 0.05 | Down | -0.21 | 0.74  |      | Expressed protein                                       |
| Pc_TC130732 | 0.4   | 0.57 |      |  | 0.61  | 0.44      |      |  | -4.08 | 0.01 | Down | -1.76 | 0.06  |      | Expressed protein                                       |
| Pc_TC130741 | 0.34  | 0.96 |      |  | 2.82  | 0.02      | Up   |  | -0.01 | 1    |      | 1     | 0.56  |      | Expressed protein                                       |
| Pc_TC130764 | 0.75  | 0.04 |      |  | 0.51  | 0.28      |      |  | -3.22 | 0    | Down | -0.26 | 0.64  |      | Expressed protein                                       |
| Pc_TC130771 | -1.07 | 0.23 |      |  | -0.8  | 0.42      |      |  | -1.01 | 0.44 |      | -3.11 | 0.01  | Down | Putative early-responsive to dehydration stress protein |
| Pc_TC130775 | -2.92 | 0.03 | Down |  | -1.72 | 0.18      |      |  | 0.01  | 1    |      | -2.64 | 0.04  | Down | Expressed protein                                       |
| Pc_TC130784 | -1.02 | 0.15 |      |  | -2.26 | 0.01      | Down |  | 0.47  | 0.67 |      | -0.06 | 0.95  |      | Expressed protein                                       |
| Pc_TC130791 | -1.06 | 0.13 |      |  | -3.63 | 0         | Down |  | 0.77  | 0.47 |      | 0.09  | 0.92  |      | Expressed protein                                       |
| Pc_TC130792 | -0.55 | 0.35 |      |  | -1.52 | 0.04      | Down |  | 0.68  | 0.5  |      | 0.33  | 0.63  |      | Expressed protein                                       |



|             |       |       |      |            |           |      |       |           |      |       |      |      |                                                                            |
|-------------|-------|-------|------|------------|-----------|------|-------|-----------|------|-------|------|------|----------------------------------------------------------------------------|
| Pc_TC130798 | 1.78  | 0.1   |      | 2.89       | 0.01      | Up   | -1.91 | 0.4       |      | 0.63  | 0.69 |      | Expressed protein                                                          |
| Pc_TC130803 | -0.21 | 0.88  |      | 1.15       | 0.23      |      | -3.96 | 0.03      | Down | -2.25 | 0.08 |      | Expressed protein                                                          |
| Pc_TC130804 | 2.54  | 0     | Up   | 0          | 0.07      |      | 1.94  | 0.16      |      | 0.63  | 0.66 |      | Expressed protein                                                          |
| Pc_TC130819 | -0.78 | 0.38  |      | 0.83       | 0.33      |      | -2.74 | 0.06      |      | -3.3  | 0.01 | Down | Expressed protein                                                          |
| Pc_TC130825 | -0.76 | 0.31  |      | -0.2       | 0.82      |      | 2.23  | 0.04      | Up   | 1.87  | 0.01 | Up   | Expressed protein                                                          |
| Pc_TC130842 | 1.42  | 0.14  |      | 2.96       | 0         | Up   | -0.88 | 0.62      |      | 0.32  | 0.84 |      | Expressed protein                                                          |
| Pc_TC130848 | -0.04 | 1     |      | 1.09       | 0.24      |      | -5.2  | 0.01      | Down | -2.27 | 0.06 |      | Expressed protein                                                          |
| Pc_TC130882 | -2.98 | 0.02  | Down | -0.89      | 0.46      |      | -0.01 | 1         |      | -0.77 | 0.49 |      | Expressed protein                                                          |
| Pc_TC130908 | -3.09 | 0.02  | Down | -1.37      | 0.25      |      | -2.25 | 0.14      |      | -1.96 | 0.09 |      | Expressed protein                                                          |
| Pc_TC130915 | -0.58 | 0.63  |      | 0.13       | 0.96      |      | -3.74 | 0.05      | Down | -2.62 | 0.06 |      | Uncharacterized protein                                                    |
| Pc_TC130916 | 1.51  | 0.02  | Up   | 2.34       | 0         | Up   | -1.29 | 0.31      |      | 1.02  | 0.21 |      | Expressed protein                                                          |
| Pc_TC130917 | -0.11 | 0.88  |      | 0.51       | 0.49      |      | -4.67 | 0         | Down | -2.41 | 0.01 | Down | Expressed protein                                                          |
| Pc_TC130919 | 0.56  | 0.5   |      | 0.24       | 0.83      |      | -3.4  | 0.03      | Down | -3.28 | 0.01 | Down | Expressed protein                                                          |
| Pc_TC130920 | -0.23 | 0.81  |      | -1.87      | 0.08      |      | -3.3  | 0.03      | Down | -0.64 | 0.5  |      | Expressed protein                                                          |
| Pc_TC130925 | -0.31 | 0.72  |      | 0.57       | 0.51      |      | -5.89 | 0         | Down | -1.45 | 0.14 |      | Expressed protein                                                          |
| Pc_TC130941 | -3.09 | 0.04  | Down | -3.11      | 0.06      |      | 0.46  | 0.76      |      | -0.15 | 0.94 |      | Expressed protein                                                          |
| Pc_TC130947 | -1.23 | 0.03  | Down | -1.19      | 0.07      |      | -0.85 | 0.4       |      | -0.22 | 0.74 |      | Uncharacterized protein                                                    |
| Pc_TC130961 | -0.12 | 0.95  |      | 1.93       | 0.03      | Up   | -1.7  | 0.26      |      | -1.58 | 0.19 |      | Ribosomal protein L6 family protein                                        |
| Pc_TC130971 | 1.52  | 0.01  | Up   | 1.19       | 0.08      |      | 0.05  | 0.98      |      | 0.44  | 0.55 |      | Esterase/lipase/thioesterase family protein                                |
| Pc_TC130975 | -0.73 | 0.76  |      | 1.16       | 0.43      |      | 4.26  | 0         | Up   | 1.4   | 0.28 |      | Expressed protein                                                          |
| Pc_TC130979 | 2.71  | ##### | Up   | 0          | 0         |      | 2.11  | 0.07      |      | 0.04  | 1    |      | Expressed protein                                                          |
| Pc_TC130984 | 0.11  | 0.86  |      | -0.29      | 0.68      |      | -3.09 | 0.01      | Down | -2.24 | 0    | Down | Expressed protein                                                          |
| Pc_TC131002 | -1.84 | 0.01  | Down | -0.28      | 0.69      |      | -0.67 | 0.53      |      | -0.33 | 0.65 |      | Expressed protein                                                          |
| Pc_TC131005 | -0.05 | 0.97  |      | 0.58       | 0.47      |      | -5.4  | 0         | Down | -1.53 | 0.09 |      | Uncharacterized protein                                                    |
| Pc_TC131010 | 0.08  | 0.99  |      | 1.2        | 0.22      |      | -3.82 | 0.04      | Down | -1.11 | 0.36 |      | Expressed protein                                                          |
| Pc_TC131011 | -0.63 | 0.44  |      | -0.06      | 0.97      |      | -4.53 | 0         | Down | -1.47 | 0.12 |      | Os05g0148200 protein                                                       |
| Pc_TC131013 | -0.66 | 0.63  |      | 0.06       | 1         |      | -2.08 | 0.24      |      | -4.28 | 0.02 | Down | Uncharacterized protein                                                    |
| Pc_TC131049 | -1.92 | 0.13  |      | -4.26      | 0.02      | Down | 1.45  | 0.25      |      | -0.3  | 0.82 |      | Expressed protein                                                          |
| Pc_TC131056 | -0.41 | 0.52  |      | 1.21       | 0.07      |      | -2.42 | 0.04      | Down | -1.21 | 0.12 |      | Expressed protein                                                          |
| Pc_TC131065 | -1.14 | 0.42  |      | 0.77       | 0.52      |      | -3.3  | 0.1       |      | -4.18 | 0.03 | Down | Expressed protein                                                          |
| Pc_TC131067 | 1.55  | 0     | Up   | 0.05       | 0.95      |      | 0.88  | 0.39      |      | -0.09 | 0.91 |      | glucan synthase-like 8                                                     |
| Pc_TC131071 | 0.45  | 0.34  |      | 1.47       | 0.01      | Up   | 1.25  | 0.19      |      | 1.77  | 0    | Up   | glucan synthase-like 8                                                     |
| Pc_TC131082 | 2.03  | 0     | Up   | 0          | 0         |      | 1.97  | 0.09      |      | 0.75  | 0.4  |      | Expressed protein                                                          |
| Pc_TC131097 | -1.57 | 0.02  | Down | -0.85      | 0.27      |      | 1.6   | 0.12      |      | 0.56  | 0.43 |      | RNA-directed DNA polymerase (reverse transcriptase)-related family protein |
| Pc_TC131106 | -0.68 | 0.35  |      | -1.41E-005 | 1         |      | -0.27 | 0.82      |      | -1.92 | 0.03 | Down | homogentisate 1,2-dioxygenase                                              |
| Pc_TC131113 | 1.81  | 0     | Up   | 0          | 2.00E-005 |      | 1.03  | 0.36      |      | 0     | 1    |      | Expressed protein                                                          |
| Pc_TC131121 | 0.08  | 0.98  |      | 2.27       | 0.01      | Up   | -0.39 | 0.8       |      | -0.37 | 0.75 |      | R-protein L3 B                                                             |
| Pc_TC131123 | 2.6   | 0.04  | Up   | 1.38       | 0.45      |      | -0.5  | 0.95      |      | -0.37 | 0.99 |      | Expressed protein                                                          |
| Pc_TC131128 | -0.46 | 0.65  |      | 0.11       | 0.95      |      | -3.35 | 0.04      | Down | -1.53 | 0.16 |      | Expressed protein                                                          |
| Pc_TC131136 | -0.56 | 0.45  |      | -1.1       | 0.21      |      | -0.76 | 0.52      |      | -3.86 | 0    | Down | Putative uncharacterized protein                                           |
| Pc_TC131147 | -1.04 | 0.48  |      | -0.06      | 1         |      | 2.87  | 0.02      | Up   | 1.57  | 0.13 |      | Expressed protein                                                          |
| Pc_TC131151 | -0.68 | 0.13  |      | -2.15      | 0         | Down | -5.41 | 5.21E-006 | Down | -2.03 | 0    | Down | Expressed protein                                                          |
| Pc_TC131152 | 1     | 0.01  |      | 1.24       | 0.01      | Up   | -1.64 | 0.09      |      | -0.83 | 0.17 |      | Expressed protein                                                          |
| Pc_TC131159 | -1.82 | 0.02  | Down | -1.36      | 0.13      |      | -0.21 | 0.87      |      | 0.02  | 1    |      | Expressed protein                                                          |
| Pc_TC131167 | 0.61  | 0.68  |      | 2.56       | 0.01      | Up   | -3.67 | 0.15      |      | -1.96 | 0.29 |      | Expressed protein                                                          |
| Pc_TC131178 | 0.19  | 0.82  |      | 0.09       | 0.94      |      | -3.08 | 0.03      | Down | -2.5  | 0.02 | Down | Expressed protein                                                          |
| Pc_TC131194 | -1.92 | 0.05  | Down | 0.16       | 0.88      |      | 0.18  | 0.9       |      | -0.02 | 1    |      | disulfide isomerase-like protein [Oryza sativa Japonica Group]             |
| Pc_TC131197 | -0.06 | 1     |      | 2.18       | 0.03      | Up   | -2.96 | 0.17      |      | -2.83 | 0.12 |      | Expressed protein                                                          |
| Pc_TC131202 | -0.63 | 0.41  |      | -0.02      | 1         |      | -0.62 | 0.6       |      | -1.87 | 0.04 | Down | Expressed protein                                                          |
| Pc_TC131212 | 1.87  | 0.05  | Up   | 0          | 0.05      |      | 0.5   | 0.78      |      | 0.17  | 0.96 |      | Expressed protein                                                          |
| Pc_TC131226 | 2.69  | 0     | Up   | 0          | 0.11      |      | 0.9   | 0.61      |      | -0.37 | 0.89 |      | Expressed protein                                                          |
| Pc_TC131244 | -2.68 | 0.03  | Down | -2.11      | 0.1       |      | 0     | 1         |      | -0.04 | 1    |      | Expressed protein                                                          |
| Pc_TC131265 | -2    | 0.04  | Down | -0.02      | 1         |      | -0.13 | 0.94      |      | -0.27 | 0.8  |      | Putative uncharacterized protein                                           |
| Pc_TC131268 | 0.41  | 0.52  |      | 1.48       | 0.03      | Up   | -3.91 | 0         | Down | -1.98 | 0.02 | Down | Expressed protein                                                          |
| Pc_TC131283 | 2.56  | 0     | Up   | 0          | 0         |      | 1.97  | 0.1       |      | 0.15  | 0.91 |      | Phosphoglycerate mutase family protein                                     |
| Pc_TC131287 | -0.15 | 0.82  |      | 0.73       | 0.3       |      | -2.91 | 0.02      | Down | -0.51 | 0.51 |      | Expressed protein                                                          |
| Pc_TC131314 | 0.8   | 0.07  |      | 0.91       | 0.09      |      | -2.26 | 0.03      | Down | -0.36 | 0.57 |      | Uncharacterized protein (Fragment)                                         |
| Pc_TC131318 | 0.86  | 0.57  |      | 2.5        | 0.03      | Up   | 0.02  | 1         |      | 0.4   | 0.86 |      | Expressed protein                                                          |
| Pc_TC131331 | 0.36  | 0.68  |      | 0.1        | 0.95      |      | -3.5  | 0.03      | Down | -2.37 | 0.04 | Down | Expressed protein                                                          |
| Pc_TC131364 | 0.48  | 0.59  |      | 0.57       | 0.56      |      | -4.3  | 0.02      | Down | -1.18 | 0.28 |      | Expressed protein                                                          |
| Pc_TC131367 | 1.89  | 0.02  | Up   | 2.7        | 0         | Up   | 0     | 0.01      |      | -0.22 | 0.89 |      | Expressed protein                                                          |
| Pc_TC131370 | 0.43  | 0.55  |      | 0.76       | 0.34      |      | -3.08 | 0.03      | Down | -2.04 | 0.03 | Down | Phosphatidate cytidyltransferase family protein                            |

|             |       |      |      |       |           |      |       |           |      |       |       |      |                                                         |
|-------------|-------|------|------|-------|-----------|------|-------|-----------|------|-------|-------|------|---------------------------------------------------------|
| Pc_TC131382 | -0.16 | 0.97 |      | 0.06  | 1         |      | -0.03 | 1         |      | -4.08 | 0.04  | Down | Expressed protein                                       |
| Pc_TC131391 | 1.02  | 0.14 |      | 1.84  | 0.01      | Up   | -1.47 | 0.25      |      | -0.4  | 0.66  |      | Uncharacterized protein                                 |
| Pc_TC131397 | 0.35  | 0.57 |      | 0.44  | 0.54      |      | -2.89 | 0.02      | Down | -1.56 | 0.05  |      | Expressed protein                                       |
| Pc_TC131426 | -1.35 | 0.03 | Down | -1.55 | 0.04      | Down | 0.59  | 0.57      |      | 0.41  | 0.55  |      | Expressed protein                                       |
| Pc_TC131432 | -1.44 | 0.24 |      | -3.26 | 0.05      | Down | 0.18  | 0.93      |      | -0.7  | 0.57  |      | Expressed protein                                       |
| Pc_TC131451 | -2.34 | 0.03 | Down | -0.94 | 0.38      |      | 0.36  | 0.79      |      | -0.17 | 0.89  |      | Putative uncharacterized protein                        |
| Pc_TC131462 | -0.45 | 0.67 |      | 2.03  | 0.02      | Up   | -1.29 | 0.37      |      | -1.27 | 0.26  |      | Expressed protein                                       |
| Pc_TC131494 | -0.51 | 0.67 |      | -1.16 | 0.37      |      | -4.89 | 0.02      | Down | -1.45 | 0.24  |      | Expressed protein                                       |
| Pc_TC131495 | -1.07 | 0.22 |      | -2.53 | 0.03      | Down | -2.89 | 0.04      | Down | -1.68 | 0.09  |      | Expressed protein                                       |
| Pc_TC131501 | -0.35 | 0.6  |      | 0.56  | 0.44      |      | -2.05 | 0.08      |      | -1.8  | 0.03  | Down | Expressed protein                                       |
| Pc_TC131523 | 1.84  | 0.04 | Up   | 0     | 0.03      |      | 1.23  | 0.38      |      | 0.25  | 0.89  |      | Expressed protein                                       |
| Pc_TC131535 | 0.61  | 0.32 |      | 0.47  | 0.52      |      | -2.88 | 0.02      | Down | -1.1  | 0.17  |      | Expressed protein                                       |
| Pc_TC131542 | 1.69  | 0.04 | Up   | 1.75  | 0.06      |      | -1.08 | 0.49      |      | -0.02 | 1     |      | Expressed protein                                       |
| Pc_TC131566 | -3.01 | 0.01 | Down | -5.03 | 0         | Down | -4.58 | 0.01      | Down | -4.46 | 0     | Down | S18 ribosomal protein                                   |
| Pc_TC131576 | -0.16 | 0.87 |      | 0.8   | 0.33      |      | -3.02 | 0.03      | Down | -0.37 | 0.69  |      | Expressed protein                                       |
| Pc_TC131577 | 1.12  | 0    | Up   | -0.03 | 0.96      |      | -0.38 | 0.68      |      | -0.08 | 0.9   |      | histone methyltransferases(H3-K36 specific)             |
| Pc_TC131599 | 0.16  | 0.74 |      | -0.67 | 0.27      |      | -1.79 | 0.08      |      | -1.77 | 0.01  | Down | unknown protein                                         |
| Pc_TC131614 | -0.51 | 0.58 |      | -0.02 | 1         |      | -1.58 | 0.24      |      | -2.54 | 0.02  | Down | polyubiquitin 10                                        |
| Pc_TC131621 | -2.77 | 0.01 | Down | -3.11 | 0.01      | Down | -0.27 | 0.84      |      | -0.22 | 0.84  |      | Expressed protein                                       |
| Pc_TC131631 | 1.78  | 0.23 |      | 2.31  | 0.11      |      | 0.31  | 0.99      |      | 2.63  | 0.05  | Up   | Expressed protein                                       |
| Pc_TC131636 | 0.15  | 0.8  |      | 0.54  | 0.42      |      | -4.29 | 0         | Down | -3.05 | 0     | Down | Expressed protein                                       |
| Pc_TC131650 | 0.72  | 0.32 |      | 0.21  | 0.83      |      | -4.99 | 0         | Down | -1.62 | 0.1   |      | Expressed protein                                       |
| Pc_TC131691 | 1.08  | 0.33 |      | 2.73  | 0.01      | Up   | -3.96 | 0.1       |      | -0.03 | 1     |      | Expressed protein                                       |
| Pc_TC131698 | 0.66  | 0.97 |      | 3.52  | 0.03      | Up   | -0.5  | 1         |      | -0.37 | 1     |      | Expressed protein                                       |
| Pc_TC131710 | 0.7   | 0.41 |      | 1.64  | 0.06      |      | -4.2  | 0.02      | Down | 0.05  | 1     |      | Expressed protein                                       |
| Pc_TC131716 | 0.42  | 0.65 |      | 0.45  | 0.67      |      | -1.39 | 0.34      |      | -2.49 | 0.04  | Down | Expressed protein                                       |
| Pc_TC131719 | -2.44 | 0.02 | Down | -1.18 | 0.25      |      | -2.5  | 0.08      |      | -0.94 | 0.33  |      | Expressed protein                                       |
| Pc_TC131747 | 1.78  | 0.1  |      | 3.01  | 0         | Up   | -2.5  | 0.3       |      | -1.37 | 0.47  |      | Expressed protein                                       |
| Pc_TC131758 | 0.32  | 0.43 |      | 0.3   | 0.56      |      | -3.74 | 0         | Down | -1.15 | 0.05  |      | Ribosomal protein L16p/L10e family protein              |
| Pc_TC131759 | 0.36  | 0.25 |      | 0.74  | 0.06      |      | -3    | 0         | Down | -1.33 | 0.01  | Down | Ribosomal protein L16p/L10e family protein              |
| Pc_TC131784 | -1.6  | 0.05 | Down | -1.48 | 0.11      |      | 1     | 0.37      |      | 0.54  | 0.5   |      | Expressed protein                                       |
| Pc_TC131790 | -2.09 | 0.04 | Down | -1.53 | 0.16      |      | 0.67  | 0.58      |      | 0.16  | 0.89  |      | Expressed protein                                       |
| Pc_TC131793 | 1.75  | 0.01 | Up   | 0     | 8.53E-005 |      | 1.36  | 0.23      |      | -0.55 | 0.56  |      | eukaryotic translation initiation factor 2              |
| Pc_TC131797 | -0.82 | 0.35 |      | -1.98 | 0.07      |      | 2.66  | 0.02      | Up   | 0.53  | 0.54  |      | Expressed protein                                       |
| Pc_TC131800 | 2.47  | 0.01 | Up   | 0     | 0.11      |      | 2.53  | 0.07      |      | 1.53  | 0.21  |      | Expressed protein                                       |
| Pc_TC131815 | 2.08  | 0.13 |      | 1.87  | 0.24      |      | -1.5  | 0.66      |      | 3.89  | 0     | Up   | Expressed protein                                       |
| Pc_TC131826 | 0.87  | 0.39 |      | 1.96  | 0.04      | Up   | -2.08 | 0.24      |      | 0.63  | 0.59  |      | Expressed protein                                       |
| Pc_TC131827 | -3.73 | 0.05 | Down | -1.16 | 0.45      |      | -0.3  | 0.89      |      | -0.28 | 0.88  |      | Expressed protein                                       |
| Pc_TC131830 | -0.27 | 0.68 |      | 0.08  | 0.92      |      | -2.92 | 0.02      | Down | -1.67 | 0.04  | Down | Expressed protein                                       |
| Pc_TC131859 | -0.13 | 0.95 |      | -2.4  | 0.09      |      | -2.96 | 0.08      |      | -2.83 | 0.04  | Down | Expressed protein                                       |
| Pc_TC131867 | -0.51 | 0.49 |      | -0.24 | 0.78      |      | -1.48 | 0.22      |      | -1.78 | 0.05  | Down | Expressed protein                                       |
| Pc_TC131870 | -1.34 | 0.02 | Down | -1.94 | 0.01      | Down | 0.88  | 0.37      |      | -0.13 | 0.85  |      | Expressed protein                                       |
| Pc_TC131876 | 2.33  | 0.08 |      | 3.79  | 0         | Up   | -1.5  | 0.66      |      | -1.37 | 0.66  |      | Expressed protein                                       |
| Pc_TC131890 | -0.42 | 0.67 |      | 0.46  | 0.64      |      | 0     | 0         |      | -4.33 | 0     | Down | Expressed protein                                       |
| Pc_TC131919 | -1.6  | 0.24 |      | -1.94 | 0.21      |      | -4.5  | 0.04      | Down | -2.37 | 0.11  |      | Expressed protein                                       |
| Pc_TC132014 | 3.81  | 0    | Up   | 0     | 0.36      |      | 3.15  | 0.04      | Up   | -0.79 | 0.84  |      | Putative uncharacterized protein Sb03g018841 (Fragment) |
| Pc_TC132017 | 1.7   | 0.01 | Up   | 0     | 6.86E-006 |      | 1.47  | 0.18      |      | 0.53  | 0.51  |      | Expressed protein                                       |
| Pc_TC132048 | -1.52 | 0.03 | Down | -0.91 | 0.25      |      | 0.51  | 0.64      |      | 0.11  | 0.89  |      | Ribosomal protein L7Ae/L30e/S12e/Gadd45 family protein  |
| Pc_TC132052 | 1.32  | 0.09 |      | 1.84  | 0.03      | Up   | -1.14 | 0.43      |      | -0.77 | 0.49  |      | Expressed protein                                       |
| Pc_TC132058 | -1.38 | 0.05 |      | -2.13 | 0.01      | Down | 1.67  | 0.11      |      | 0.79  | 0.27  |      | Expressed protein                                       |
| Pc_TC132060 | 0.24  | 0.75 |      | 0.27  | 0.76      |      | -3.03 | 0.03      | Down | -1.37 | 0.13  |      | Expressed protein                                       |
| Pc_TC132064 | -1.3  | 0.01 | Down | -1.16 | 0.05      |      | -0.25 | 0.79      |      | -0.81 | 0.19  |      | Expressed protein                                       |
| Pc_TC132075 | 1.27  | 0.01 | Up   | 0     | 1.71E-010 |      | 1.79  | 0.07      |      | -0.2  | 0.77  |      | Flavin binding monooxygenase                            |
| Pc_TC132089 | 2.3   | 0.02 | Up   | 0     | 0.09      |      | 2.01  | 0.16      |      | 1.54  | 0.18  |      | methionine sulfoxide reductase B 1                      |
| Pc_TC132116 | 0.46  | 0.41 |      | 0.75  | 0.25      |      | -2.64 | 0.02      | Down | -1.77 | 0.02  | Down | Expressed protein                                       |
| Pc_TC132144 | 0.08  | 1    |      | 2.84  | 0.01      | Up   | -0.17 | 0.99      |      | -0.79 | 0.69  |      | Ribosomal protein S21e                                  |
| Pc_TC132153 | 0.28  | 0.45 |      | 0.51  | 0.27      |      | -9.69 | 1.79E-011 | Down | -4.46 | ##### | Down | putative Ty1-copia subclass                             |
| Pc_TC132162 | 0.81  | 0.22 |      | -0.15 | 0.88      |      | -3.06 | 0.02      | Down | -0.61 | 0.48  |      | Expressed protein                                       |
| Pc_TC132164 | 0.49  | 0.56 |      | 1.88  | 0.02      | Up   | -4.4  | 0.01      | Down | -1.47 | 0.17  |      | Expressed protein                                       |
| Pc_TC132181 | -0.92 | 0.36 |      | -1.75 | 0.15      |      | -5.3  | 0.01      | Down | -2.01 | 0.08  |      | Expressed protein                                       |
| Pc_TC132183 | -0.37 | 0.73 |      | -0.74 | 0.53      |      | -2.03 | 0.18      |      | -3.49 | 0.01  | Down | OSJNBa0089N06.23 protein                                |
| Pc_TC132198 | -0.48 | 0.56 |      | -2.59 | 0.02      | Down | 2.4   | 0.03      | Up   | 0.07  | 0.96  |      | Expressed protein                                       |

|             |       |       |      |       |           |      |       |           |      |       |       |      |                                                                          |  |
|-------------|-------|-------|------|-------|-----------|------|-------|-----------|------|-------|-------|------|--------------------------------------------------------------------------|--|
| Pc_TC132205 | 2.43  | 0     | Up   | 0     | 0         |      | 1.44  | 0.23      |      | 0.19  | 0.87  |      | tubulin alpha-5                                                          |  |
| Pc_TC132222 | 2.49  | 0     | Up   | 0     | 0         |      | 2.34  | 0.04      | Up   | 0.89  | 0.3   |      | Expressed protein                                                        |  |
| Pc_TC132223 | 0.56  | 0.49  |      | 1.2   | 0.16      |      | -2.54 | 0.08      |      | -3.42 | 0.01  | Down | Expressed protein                                                        |  |
| Pc_TC132232 | 2.08  | 0.02  | Up   | 0     | 0.05      |      | 2.15  | 0.11      |      | 0.56  | 0.69  |      | Expressed protein                                                        |  |
| Pc_TC132235 | 0.08  | 0.95  |      | 0.33  | 0.72      |      | -2.12 | 0.12      |      | -2.22 | 0.03  | Down | Expressed protein                                                        |  |
| Pc_TC132247 | 0.07  | 0.82  |      | 0.23  | 0.58      |      | -2.04 | 0.02      | Down | -1.45 | 0.01  | Down | Expressed protein                                                        |  |
| Pc_TC132271 | 3.21  | 0     | Up   | 0     | 0.36      |      | 2.31  | 0.18      |      | 1.43  | 0.39  |      | ubiquitin carrier protein 1                                              |  |
| Pc_TC132274 | 0.76  | 0.55  |      | 0.44  | 0.8       |      | 3.38  | 0.01      | Up   | 2.06  | 0.05  |      | Expressed protein                                                        |  |
| Pc_TC132292 | 0.36  | 0.79  |      | 2.08  | 0.03      | Up   | -1.5  | 0.39      |      | -1.37 | 0.34  |      | Expressed protein                                                        |  |
| Pc_TC132293 | -0.14 | 0.98  |      | 0.95  | 0.41      |      | 2.45  | 0.05      |      | 2.4   | 0.01  | Up   | Expressed protein                                                        |  |
| Pc_TC132336 | -1.3  | 0.03  | Down | -1.29 | 0.07      |      | 1.03  | 0.3       |      | 0.02  | 0.99  |      | Expressed protein                                                        |  |
| Pc_TC132337 | -2.02 | 0     | Down | 0.22  | 0.72      |      | -1.9  | 0.07      |      | -2.62 | 0     | Down | P-loop containing nucleoside triphosphate hydrolases superfamily protein |  |
| Pc_TC132338 | 1.08  | 0.01  | Up   | 0.68  | 0.17      |      | -1.53 | 0.11      |      | -0.24 | 0.68  |      | Protein of unknown function (DUF1216)                                    |  |
| Pc_TC132339 | 0.91  | 0.26  |      | 1.47  | 0.09      |      | -4.25 | 0.02      | Down | -1.81 | 0.12  |      | Expressed protein                                                        |  |
| Pc_TC132348 | 1.73  | 0.03  | Up   | 0     | 0.01      |      | 1.62  | 0.19      |      | 0.48  | 0.66  |      | Expressed protein                                                        |  |
| Pc_TC132362 | -3.17 | 0.04  | Down | 0.57  | 0.62      |      | -2.42 | 0.15      |      | -2.04 | 0.13  |      | Uncharacterized protein                                                  |  |
| Pc_TC132380 | 1.57  | 0.11  |      | -0.08 | 1         |      | 3.64  | 0         | Up   | 0.75  | 0.56  |      | Expressed protein                                                        |  |
| Pc_TC132393 | 0.39  | 0.62  |      | 1.68  | 0.03      | Up   | -4.85 | 0         | Down | -1.92 | 0.06  |      | Uncharacterized protein                                                  |  |
| Pc_TC132404 | -0.4  | 0.58  |      | 1.41  | 0.05      | Up   | -3.92 | 0         | Down | -0.54 | 0.51  |      | Expressed protein                                                        |  |
| Pc_TC132410 | -4.57 | 0     | Down | -3.59 | 0         | Down | -2.33 | 0.08      |      | -6.02 | ##### | Down | Expressed protein                                                        |  |
| Pc_TC132421 | 0.36  | 0.38  |      | 0.74  | 0.14      |      | -2.17 | 0.03      | Down | -1.53 | 0.01  | Down | Expressed protein                                                        |  |
| Pc_TC132424 | 0.72  | 0.46  |      | 2.1   | 0.02      | Up   | -2.67 | 0.13      |      | 0.5   | 0.66  |      | Expressed protein                                                        |  |
| Pc_TC132426 | -2.07 | 0.03  | Down | -0.26 | 0.8       |      | 0.77  | 0.52      |      | -0.37 | 0.7   |      | Expressed protein                                                        |  |
| Pc_TC132435 | 1.75  | 0.03  | Up   | 0.91  | 0.36      |      | -1.08 | 0.47      |      | 0.79  | 0.43  |      | Expressed protein                                                        |  |
| Pc_TC132449 | 0.37  | 0.35  |      | 0.29  | 0.57      |      | -5.36 | 3.25E-006 | Down | -1.91 | 0     | Down | gag protein                                                              |  |
| Pc_TC132468 | -0.01 | 1     |      | 0.34  | 0.74      |      | -2.33 | 0.11      |      | -2.57 | 0.03  | Down | Expressed protein                                                        |  |
| Pc_TC132475 | 1.23  | 0.16  |      | 0.41  | 0.74      |      | 2.97  | 0.01      | Up   | 2.03  | 0.03  | Up   | Expressed protein                                                        |  |
| Pc_TC132494 | 0.64  | 0.3   |      | 1.15  | 0.1       |      | -2.71 | 0.03      | Down | 0.11  | 0.9   |      | Expressed protein                                                        |  |
| Pc_TC132509 | 1.3   | 0.14  |      | 0.93  | 0.38      |      | 2.44  | 0.05      | Up   | 1.95  | 0.03  | Up   | Expressed protein                                                        |  |
| Pc_TC132518 | 0.18  | 0.84  |      | 0.29  | 0.77      |      | -3.85 | 0.01      | Down | -0.56 | 0.56  |      | Expressed protein                                                        |  |
| Pc_TC132525 | 1.16  | 0.03  | Up   | 1.45  | 0.02      | Up   | -1.29 | 0.24      |      | 0.54  | 0.45  |      | Expressed protein                                                        |  |
| Pc_TC132536 | 2.3   | 0.04  | Up   | 0     | 0.2       |      | 0.62  | 0.79      |      | -0.37 | 0.93  |      | Expressed protein                                                        |  |
| Pc_TC132547 | 1.28  | 0.24  |      | 2.38  | 0.02      | Up   | -1.23 | 0.53      |      | -0.53 | 0.77  |      | Putative uncharacterized protein P0429B05.15                             |  |
| Pc_TC132550 | 1.4   | 0.06  |      | 1.78  | 0.03      | Up   | -3.82 | 0.02      | Down | 0.78  | 0.39  |      | catalytics                                                               |  |
| Pc_TC132590 | 2.29  | 0.02  | Up   | 0     | 0.11      |      | 2.95  | 0.03      | Up   | 0.21  | 0.97  |      | E3 Ubiquitin ligase family protein                                       |  |
| Pc_TC132592 | -0.05 | 1     |      | 0.52  | 0.62      |      | -4.08 | 0.03      | Down | -1.37 | 0.24  |      | Expressed protein                                                        |  |
| Pc_TC132611 | 1.11  | 0.19  |      | 2.3   | 0.01      | Up   | -1.19 | 0.43      |      | 0.91  | 0.36  |      | Putative uncharacterized protein Sb06g016046 (Fragment)                  |  |
| Pc_TC132618 | -2.78 | 0     | Down | -0.99 | 0.27      |      | -1.77 | 0.16      |      | -2.43 | 0.01  | Down | ARM repeat superfamily protein                                           |  |
| Pc_TC132620 | -0.35 | 0.74  |      | -0.11 | 0.96      |      | -2.93 | 0.07      |      | -3.54 | 0.01  | Down | Expressed protein                                                        |  |
| Pc_TC132653 | -3.73 | 0.05  | Down | 0.06  | 1         |      | -0.6  | 0.73      |      | -3.18 | 0.06  |      | Expressed protein                                                        |  |
| Pc_TC132658 | -2.92 | 0.21  |      | -0.94 | 0.67      |      | 2.88  | 0.04      | Up   | 1.48  | 0.23  |      | Expressed protein                                                        |  |
| Pc_TC132663 | 2.03  | 0     | Up   | 0     | 0         |      | 1.01  | 0.39      |      | 0.5   | 0.58  |      | Ubiquinol-cytochrome C reductase hinge protein                           |  |
| Pc_TC132714 | 0.95  | 0.54  |      | -0.2  | 1         |      | 3.15  | 0.03      | Up   | 2.17  | 0.08  |      | Uncharacterized protein                                                  |  |
| Pc_TC132752 | 0.87  | 0.06  |      | 1.02  | 0.07      |      | -3.32 | 0         | Down | -0.89 | 0.18  |      | Expressed protein                                                        |  |
| Pc_TC132754 | 0.19  | 0.76  |      | 0.78  | 0.24      |      | -1.92 | 0.09      |      | -1.94 | 0.02  | Down | actin depolymerizing factor 4                                            |  |
| Pc_TC132773 | 1.69  | 0.04  | Up   | 1.47  | 0.13      |      | 0.66  | 0.65      |      | 1.61  | 0.09  |      | Expressed protein                                                        |  |
| Pc_TC132779 | 0     | ##### |      | -5.42 | 7.36E-006 | Down | 0.95  | 0.38      |      | -5.85 | ##### | Down | Expressed protein                                                        |  |
| Pc_TC132803 | 0     | 1     |      | -1.79 | 0.22      |      | -1.21 | 0.45      |      | -2.96 | 0.05  | Down | Expressed protein                                                        |  |
| Pc_TC132805 | 1.76  | 0.19  |      | 1.06  | 0.56      |      | 2.83  | 0.06      |      | 3.37  | 0     | Up   | Expressed protein                                                        |  |
| Pc_TC132807 | 0.87  | 0.46  |      | 0.3   | 0.88      |      | 3.07  | 0.02      | Up   | 2.1   | 0.04  | Up   | Expressed protein                                                        |  |
| Pc_TC132808 | -0.74 | 0.23  |      | -2.17 | 0.01      | Down | -0.06 | 0.96      |      | -0.24 | 0.75  |      | Expressed protein                                                        |  |
| Pc_TC132839 | -3.38 | 0.02  | Down | -2.82 | 0.06      |      | -1.63 | 0.28      |      | -2.25 | 0.08  |      | GTP binding Elongation factor Tu family protein                          |  |
| Pc_TC132842 | -0.08 | 1     |      | 0.62  | 0.58      |      | -1.29 | 0.41      |      | -3.62 | 0.02  | Down | Expressed protein                                                        |  |
| Pc_TC132853 | 0.76  | 0.42  |      | 0     | 0.01      |      | -2.82 | 0.1       |      | -4.7  | 0.01  | Down | cytochrome B5 isoform B                                                  |  |
| Pc_TC132858 | 0.66  | 0.97  |      | 4.15  | 0         | Up   | -1.5  | 0.85      |      | 1.95  | 0.36  |      | Expressed protein                                                        |  |
| Pc_TC132860 | 1.96  | 0.01  | Up   | 0     | 0.01      |      | 1.26  | 0.33      |      | -0.3  | 0.83  |      | Expressed protein                                                        |  |
| Pc_TC132872 | 3.05  | ##### | Up   | 0     | 1.02E-005 |      | 2.14  | 0.05      | Up   | 0.05  | 0.98  |      | Expressed protein                                                        |  |
| Pc_TC132879 | -4.45 | 0     | Down | 0.34  | 0.7       |      | -3.44 | 0.02      | Down | -5.9  | ##### | Down | Expressed protein                                                        |  |
| Pc_TC132883 | 0.41  | 0.64  |      | 1.53  | 0.07      |      | -3.87 | 0.02      | Down | -1.87 | 0.09  |      | Uncharacterized protein                                                  |  |
| Pc_TC132884 | -0.13 | 0.88  |      | 0.33  | 0.7       |      | -5.38 | 0         | Down | -2.45 | 0.01  | Down | transducin family protein / WD-40 repeat family protein                  |  |
| Pc_TC132920 | -1.42 | 0.1   |      | -0.67 | 0.48      |      | -2.76 | 0.05      | Down | -1.96 | 0.05  | Down | Expressed protein                                                        |  |
| Pc_TC132944 | 0.29  | 0.81  |      | 0.27  | 0.85      |      | 2.67  | 0.03      | Up   | 1.4   | 0.14  |      | DEAD-box ATP-dependent RNA helicase                                      |  |

|             |       |       |      |       |           |      |       |      |      |       |      |      |                                                  |       |
|-------------|-------|-------|------|-------|-----------|------|-------|------|------|-------|------|------|--------------------------------------------------|-------|
| Pc_TC132962 | 0.55  | 0.38  |      | 0.49  | 0.51      |      | -2.65 | 0.03 | Down | -1.81 | 0.03 | Down | Uncharacterized protein (Fragment)               |       |
| Pc_TC132963 | -4.49 | ##### | Down | -3.34 | 0         | Down | -2.98 | 0.02 | Down | -3.04 | 0    | Down | Expressed protein                                |       |
| Pc_TC132967 | -0.15 | 0.71  |      | 0.26  | 0.61      |      | -1.65 | 0.08 |      | -1.33 | 0.03 | Down | Expressed protein                                |       |
| Pc_TC132973 | 0.05  | 0.93  |      | 0.2   | 0.73      |      | -2.01 | 0.05 |      | -1.34 | 0.04 | Down | Expressed protein                                |       |
| Pc_TC132990 | -0.73 | 0.61  |      | 2.11  | 0.03      | Up   | -1.3  | 0.45 |      | -2.6  | 0.1  |      | Uncharacterized protein                          |       |
| Pc_TC133007 | 1.69  | 0.01  | Up   | 0     | 2.64E-005 |      | 1.48  | 0.18 |      | -0.03 | 0.99 |      | BAX inhibitor 1                                  |       |
| Pc_TC133011 | 2.66  | 0.31  |      | 2.64  | 0.36      |      | 1.83  | 0.66 |      | 5.08  | 0    | Up   | Expressed protein                                |       |
| Pc_TC133015 | -2.62 | 0.03  | Down | -1.06 | 0.37      |      | 0.56  | 0.67 |      | 0.25  | 0.83 |      | Expressed protein                                |       |
| Pc_TC133022 | 1.74  | 0.01  | Up   | 0     | 0         |      | 1.3   | 0.27 |      | -0.24 | 0.83 |      | Expressed protein                                |       |
| Pc_TC133036 | -1.27 | 0.19  |      | -0.99 | 0.36      |      | 2.35  | 0.04 | Up   | 1.28  | 0.13 |      | Uncharacterized protein                          |       |
| Pc_TC133039 | -0.32 | 0.73  |      | -0.02 | 1         |      | -2.38 | 0.09 |      | -4.58 | 0    | Down | Expressed protein                                |       |
| Pc_TC133041 | 0.05  | 0.98  |      | -2.07 | 0.05      | Down | 0.81  | 0.48 |      | 0.48  | 0.57 |      | Expressed protein                                |       |
| Pc_TC133043 | -0.39 | 0.33  |      | -1.07 | 0.04      | Down | 1.37  | 0.12 |      | 0.88  | 0.11 |      | Expressed protein                                |       |
| Pc_TC133046 | -2.04 | 0.04  | Down | -1.23 | 0.23      |      | 0.39  | 0.76 |      | 0.01  | 1    |      | Expressed protein                                |       |
| Pc_TC133139 | -0.48 | 0.66  |      | 0.81  | 0.41      |      | -5.14 | 0.01 | Down | -1.43 | 0.21 |      | Expressed protein                                |       |
| Pc_TC133155 | -0.51 | 0.52  |      | -2.7  | 0.01      | Down | 0.74  | 0.52 |      | -0.2  | 0.83 |      | Expressed protein                                |       |
| Pc_TC133174 | 1.72  | 0.12  |      | 2.23  | 0.05      | Up   | 2.2   | 0.12 |      | 1.43  | 0.25 |      | Expressed protein                                |       |
| Pc_TC133183 | -2.42 | 0.1   |      | -0.44 | 0.77      |      | -0.88 | 0.58 |      | -3.46 | 0.03 | Down | Expressed protein                                |       |
| Pc_TC133211 | 2.74  | 0.01  | Up   | 0     | 0.2       |      | 2.41  | 0.11 |      | 0.63  | 0.74 |      | Expressed protein                                |       |
| Pc_TC133220 | -0.27 | 0.81  |      | 0.11  | 0.95      |      | -1.06 | 0.45 |      | -2.86 | 0.02 | Down | Expressed protein                                |       |
| Pc_TC133231 | 2.54  | 0.02  | Up   | 0     | 0.2       |      | 1.38  | 0.42 |      | -0.96 | 0.68 |      | Expressed protein                                |       |
| Pc_TC133233 | -0.06 | 0.95  |      | 1.56  | 0.02      | Up   | -1.42 | 0.23 |      | -0.09 | 0.92 |      | Expressed protein                                |       |
| Pc_TC133246 | 2.57  | ##### | Up   | 0     | 0         |      | 1.9   | 0.09 |      | 0.5   | 0.58 |      | Expressed protein                                |       |
| Pc_TC133247 | -1.62 | 0.14  |      | -1.32 | 0.27      |      | -2.39 | 0.12 |      | -3.08 | 0.02 | Down | Putative uncharacterized protein                 |       |
| Pc_TC133256 | -0.57 | 0.42  |      | 0.68  | 0.35      |      | -1.48 | 0.21 |      | -1.75 | 0.04 | Down | Putative polyprotein                             |       |
| Pc_TC133264 | -0.66 | 0.58  |      | 0.06  | 1         |      | -3.82 | 0.04 | Down | -2.11 | 0.11 |      | Expressed protein                                |       |
| Pc_TC133270 | -1.11 | 0.25  |      | 0.55  | 0.56      |      | -3.17 | 0.04 | Down | -1.05 | 0.31 |      | uncharacterized protein                          |       |
| Pc_TC133274 | 4.69  | ##### | Up   | 0     | 0.67      |      | 4.12  | 0.02 | Up   | 3.87  | 0.01 | Up   | mitochondrial acyl carrier protein 2             |       |
| Pc_TC133275 | 2.06  | 0.01  | Up   | 0     | 0         |      | 1.74  | 0.15 |      | -0.01 | 1    |      | mitochondrial acyl carrier protein 1             |       |
| Pc_TC133311 | 1.4   | 0.61  |      | 3.31  | 0.04      | Up   | 0.5   | 1    |      | 1.63  | 0.49 |      | Expressed protein                                |       |
| Pc_TC133320 | -0.04 | 1     |      | -0.89 | 0.46      |      | -4.14 | 0.02 | Down | -3.02 | 0.02 | Down | Expressed protein                                |       |
| Pc_TC133342 | -0.92 | 0.43  |      | 0.38  | 0.76      |      | -2.82 | 0.1  |      | -3.11 | 0.03 | Down | Expressed protein                                |       |
| Pc_TC133355 | 0.8   | 0.11  |      | 1.27  | 0.03      | Up   | -1.92 | 0.08 |      | -0.42 | 0.54 |      | Expressed protein                                |       |
| Pc_TC133360 | 0     | 0.02  |      | 0     | 0.02      |      | -0.84 | 0.63 |      | -4.18 | 0.03 | Down | Histone superfamily protein                      | CCAAT |
| Pc_TC133362 | -0.2  | 0.83  |      | -2.14 | 0.04      | Down | 1.27  | 0.26 |      | -0.34 | 0.71 |      | WRKY DNA-binding protein 30                      | WRKY  |
| Pc_TC133365 | -0.31 | 0.68  |      | 0.24  | 0.78      |      | -1.34 | 0.27 |      | -1.88 | 0.04 | Down | Expressed protein                                |       |
| Pc_TC133370 | -1.92 | 0.13  |      | -4.26 | 0.02      | Down | -0.91 | 0.55 |      | -1.89 | 0.14 |      | GA requiring 3                                   |       |
| Pc_TC133373 | 0.56  | 0.82  |      | 2.59  | 0.04      | Up   | 0.5   | 0.87 |      | -0.37 | 0.96 |      | Expressed protein                                |       |
| Pc_TC133389 | -0.01 | 1     |      | 0.41  | 0.61      |      | -2.36 | 0.06 |      | -2.09 | 0.02 | Down | Expressed protein                                |       |
| Pc_TC133392 | 3.37  | 0     | Up   | 0     | 0.27      |      | 1.18  | 0.54 |      | -1.11 | 0.68 |      | Expressed protein                                |       |
| Pc_TC133418 | -0.31 | 0.7   |      | 0.85  | 0.28      |      | -2.82 | 0.04 | Down | -1.07 | 0.23 |      | Expressed protein                                |       |
| Pc_TC133421 | 1.97  | 0.04  | Up   | 0     | 0.07      |      | 0.09  | 1    |      | -0.11 | 1    |      | Expressed protein                                |       |
| Pc_TC133427 | -1.66 | 0.18  |      | 0.06  | 1         |      | -2.01 | 0.21 |      | -4.7  | 0.01 | Down | Expressed protein                                |       |
| Pc_TC133459 | 2.27  | 0.01  | Up   | 0     | 0.04      |      | 0.31  | 0.88 |      | -0.15 | 0.97 |      | Expressed protein                                |       |
| Pc_TC133474 | 2.58  | 0     | Up   | 0     | 0.04      |      | 1.96  | 0.14 |      | 0.36  | 0.81 |      | Expressed protein                                |       |
| Pc_TC133475 | 3.24  | ##### | Up   | 0     | 0.02      |      | 2.57  | 0.04 | Up   | 1.18  | 0.27 |      | Zn-dependent exopeptidases superfamily protein   |       |
| Pc_TC133485 | 0     | 0.02  |      | -1.43 | 0.37      |      | -1.13 | 0.51 |      | -4.18 | 0.03 | Down | Expressed protein                                |       |
| Pc_TC133526 | 2.89  | 0.02  | Up   | 3.52  | 0         | Up   | 0.09  | 1    |      | 1.95  | 0.19 |      | Ovary C/EBPg transcription factor                |       |
| Pc_TC133530 | -4.04 | 0     | Down | -0.64 | 0.48      |      | 0.26  | 0.83 |      | -0.68 | 0.45 |      | Outer arm dynein light chain 1 protein           |       |
| Pc_TC133573 | 2.86  | ##### | Up   | 0     | 7.12E-009 |      | 1.43  | 0.16 |      | 0.04  | 0.96 |      | OSJNBa0014K14.3 protein                          |       |
| Pc_TC133576 | -0.2  | 0.89  |      | -0.3  | 0.83      |      | -3.44 | 0.05 | Down | -2.58 | 0.05 | Down | Expressed protein                                |       |
| Pc_TC133582 | 0.66  | 0.97  |      | 0     | 0.67      |      | 4.81  | 0    | Up   | 0     | 0.54 |      | ribosomal protein L5 B                           |       |
| Pc_TC133609 | 2.37  | 0.01  | Up   | -0.46 | 0.84      |      | -0.01 | 1    |      | -1.7  | 0.32 |      | Major facilitator superfamily protein            |       |
| Pc_TC133631 | 0.26  | 0.79  |      | 1.03  | 0.25      |      | -3.35 | 0.04 | Down | -1.43 | 0.19 |      | Expressed protein                                |       |
| Pc_TC133632 | 0.36  | 0.5   |      | 0.01  | 0.99      |      | -2.41 | 0.03 | Down | -1.44 | 0.05 | Down | Expressed protein                                |       |
| Pc_TC133650 | -1.11 | 0.4   |      | 0.38  | 0.78      |      | -4.5  | 0.04 | Down | -3.37 | 0.04 | Down | Expressed protein                                |       |
| Pc_TC133670 | 0.03  | 1     |      | -0.3  | 0.8       |      | -1.41 | 0.31 |      | -2.79 | 0.02 | Down | Expressed protein                                |       |
| Pc_TC133684 | -1.98 | 0.03  | Down | -1.26 | 0.19      |      | -0.33 | 0.79 |      | -1.77 | 0.07 |      | Putative uncharacterized protein OSJNBa0056E06.7 |       |
| Pc_TC133725 | -1.04 | 0.48  |      | -2.06 | 0.24      |      | 0     | 0.03 |      | -4.08 | 0.04 | Down | Expressed protein                                |       |
| Pc_TC133734 | 0.49  | 0.62  |      | 0.8   | 0.44      |      | 0     | 0.01 |      | -2.77 | 0.04 | Down | Expressed protein                                |       |
| Pc_TC133737 | 0.12  | 0.75  |      | 0     | 1         |      | -2.08 | 0.03 | Down | -0.76 | 0.18 |      | Expressed protein                                |       |
| Pc_TC133745 | 0.59  | 0.21  |      | 0.93  | 0.1       |      | -2.73 | 0.01 | Down | -1.26 | 0.06 |      | Expressed protein                                |       |

|             |       |       |      |       |           |      |  |       |      |      |       |       |      |                                                        |     |
|-------------|-------|-------|------|-------|-----------|------|--|-------|------|------|-------|-------|------|--------------------------------------------------------|-----|
| Pc_TC133746 | 0.03  | 1     |      | 0.89  | 0.25      |      |  | -4.35 | 0    | Down | -1.65 | 0.07  |      | Expressed protein                                      |     |
| Pc_TC133751 | 1.59  | 0.02  | Up   | 0     | 6.30E-005 |      |  | 1.04  | 0.37 |      | -0.31 | 0.74  |      | Expressed protein                                      |     |
| Pc_TC133758 | 0.79  | 0.15  |      | 0.58  | 0.38      |      |  | -2.93 | 0.01 | Down | -1.95 | 0.01  | Down | Epstein-Barr virus EBNA-1-like protein                 |     |
| Pc_TC133759 | 0.21  | 0.64  |      | 0.24  | 0.67      |      |  | -1.55 | 0.12 |      | -1.68 | 0.01  | Down | Expressed protein                                      |     |
| Pc_TC133762 | 0.51  | 0.47  |      | 1.74  | 0.02      | Up   |  | -0.4  | 0.74 |      | -0.06 | 0.96  |      | Expressed protein                                      |     |
| Pc_TC133766 | -1.34 | 0.18  |      | 0.15  | 0.91      |      |  | 2.26  | 0.05 | Up   | 1.16  | 0.17  |      | Expressed protein                                      |     |
| Pc_TC133769 | -0.83 | 0.32  |      | 0.36  | 0.68      |      |  | -5.05 | 0    | Down | -2.12 | 0.03  | Down | Expressed protein                                      |     |
| Pc_TC133786 | 0.05  | 0.92  |      | 0.9   | 0.1       |      |  | -2.34 | 0.03 | Down | -1.87 | 0.01  | Down | Expressed protein                                      |     |
| Pc_TC133795 | 0.37  | 0.85  |      | 2.17  | 0.05      | Up   |  | -1.08 | 0.61 |      | 0.04  | 1     |      | Expressed protein                                      |     |
| Pc_TC133810 | -2.09 | 0.12  |      | -3.11 | 0.06      |      |  | 0.14  | 0.96 |      | -2.96 | 0.05  | Down | Thioredoxin family protein                             |     |
| Pc_TC133813 | 2.13  | 0     | Up   | 0     | 6.86E-006 |      |  | 2.1   | 0.05 |      | 0.11  | 0.91  |      | Expressed protein                                      |     |
| Pc_TC133829 | 0.52  | 0.54  |      | 1.43  | 0.09      |      |  | -1.13 | 0.41 |      | 1.74  | 0.03  | Up   | Expressed protein                                      |     |
| Pc_TC133844 | 1.74  | 0.01  | Up   | 0     | 0         |      |  | 1.16  | 0.33 |      | 0.24  | 0.82  |      | Expressed protein                                      |     |
| Pc_TC133846 | 0.95  | 0.08  |      | 0.71  | 0.29      |      |  | -1.18 | 0.28 |      | -1.56 | 0.05  | Down | Expressed protein                                      |     |
| Pc_TC133850 | -1.11 | 0.4   |      | -1.94 | 0.21      |      |  | -2.91 | 0.12 |      | -3.37 | 0.04  | Down | Expressed protein                                      |     |
| Pc_TC133856 | -0.53 | 0.2   |      | -5.98 | 7.23E-016 | Down |  | -0.31 | 0.74 |      | -2.23 | 0     | Down | Expressed protein                                      |     |
| Pc_TC133864 | 2.66  | 0.03  | Up   | 0     | 0.36      |      |  | 1.83  | 0.32 |      | 1.63  | 0.31  |      | cyclase associated protein 1                           |     |
| Pc_TC133865 | -1.55 | 0.05  |      | -2.26 | 0.02      | Down |  | 0.59  | 0.6  |      | -0.31 | 0.72  |      | debranching enzyme 1                                   |     |
| Pc_TC133870 | -1.77 | 0.18  |      | 2.21  | 0.01      | Up   |  | 2.06  | 0.1  |      | 0.26  | 0.85  |      | debranching enzyme 1                                   |     |
| Pc_TC133871 | 1.09  | 0.01  | Up   | 1     | 0.07      |      |  | 0.46  | 0.63 |      | 0.08  | 0.89  |      | Expressed protein                                      |     |
| Pc_TC133883 | 2.12  | 0     | Up   | 0     | 3.22E-006 |      |  | 1.71  | 0.11 |      | 0.03  | 0.99  |      | Os01g0557400 protein                                   |     |
| Pc_TC133885 | -0.19 | 0.68  |      | 0.02  | 0.97      |      |  | -1.07 | 0.27 |      | -1.26 | 0.04  | Down | Expressed protein                                      |     |
| Pc_TC133893 | -1.8  | 0.14  |      | -4.4  | 0.01      | Down |  | -0.56 | 0.71 |      | -1.03 | 0.38  |      | Expressed protein                                      |     |
| Pc_TC133915 | -0.92 | 0.41  |      | -0.49 | 0.7       |      |  | 0     | 0.01 |      | -2.83 | 0.04  | Down | Expressed protein                                      |     |
| Pc_TC133941 | 0.42  | 0.6   |      | 1.08  | 0.2       |      |  | -4.12 | 0.01 | Down | -3    | 0.01  | Down | Expressed protein                                      |     |
| Pc_TC133952 | 2.78  | 0     | Up   | 0     | 0.01      |      |  | 1.99  | 0.11 |      | 0.91  | 0.37  |      | NADH-ubiquinone oxidoreductase-related                 |     |
| Pc_TC133983 | -4.17 | 0     | Down | -2.6  | 0.03      | Down |  | -4.74 | 0.01 | Down | 0     | ##### |      | putative unclassified expressed                        |     |
| Pc_TC133984 | -4.09 | 0.02  | Down | 0.28  | 0.84      |      |  | 1.09  | 0.41 |      | 0.21  | 0.89  |      | Expressed protein                                      |     |
| Pc_TC133991 | -1.2  | 0.15  |      | -0.15 | 0.88      |      |  | -0.53 | 0.67 |      | -5.05 | ##### | Down | Expressed protein                                      |     |
| Pc_TC133997 | 0.08  | 1     |      | 2.23  | 0.04      | Up   |  | 0.09  | 1    |      | 0.95  | 0.45  |      | Expressed protein                                      |     |
| Pc_TC134001 | 0.21  | 0.55  |      | 0.27  | 0.56      |      |  | -2.66 | 0.01 | Down | -1.91 | 0     | Down | Expressed protein                                      |     |
| Pc_TC134026 | 1.89  | 0     | Up   | 0     | 2.00E-005 |      |  | 1.22  | 0.27 |      | -0.09 | 0.94  |      | 10-formyltetrahydrofolate synthetase                   |     |
| Pc_TC134031 | 2.74  | ##### | Up   | 0     | 0         |      |  | 1.66  | 0.17 |      | 0.17  | 0.89  |      | Transducin/WD40 repeat-like superfamily protein        | SAP |
| Pc_TC134032 | -0.13 | 0.93  |      | 0.54  | 0.58      |      |  | -3.82 | 0.02 | Down | -3.28 | 0.01  | Down | Putative uncharacterized protein                       |     |
| Pc_TC134036 | 0.66  | 0.33  |      | -1.94 | 0.04      | Down |  | 0.82  | 0.47 |      | -3.28 | 0     | Down | Expressed protein                                      |     |
| Pc_TC134037 | -1.4  | 0.04  | Down | -0.17 | 0.83      |      |  | 0.85  | 0.42 |      | 0.96  | 0.18  |      | Expressed protein                                      |     |
| Pc_TC134042 | -0.02 | 1     |      | -0.04 | 1         |      |  | 0     | 0.02 |      | -4.28 | 0.02  | Down | Expressed protein                                      |     |
| Pc_TC134056 | 1.58  | 0.02  | Up   | -0.01 | 1         |      |  | 3.44  | 0    | Up   | 1.16  | 0.15  |      | Expressed protein                                      |     |
| Pc_TC134066 | 2.25  | 0.01  | Up   | 0     | 0.04      |      |  | 1.17  | 0.42 |      | -0.37 | 0.83  |      | TCP-1/cpn60 chaperonin family protein                  |     |
| Pc_TC134077 | -0.99 | 0.37  |      | -2.88 | 0.05      | Down |  | -0.11 | 0.96 |      | -0.44 | 0.71  |      | Expressed protein                                      |     |
| Pc_TC134084 | 0.55  | 0.32  |      | 0.9   | 0.16      |      |  | -3.03 | 0.01 | Down | -1.44 | 0.05  |      | Expressed protein                                      |     |
| Pc_TC134092 | -1.1  | 0.24  |      | 0.56  | 0.55      |      |  | -4    | 0.02 | Down | -3.46 | 0.01  | Down | Expressed protein                                      |     |
| Pc_TC134098 | 0.73  | 0.32  |      | 1.56  | 0.04      | Up   |  | -0.79 | 0.54 |      | -0.03 | 1     |      | Expressed protein                                      |     |
| Pc_TC134113 | -2.09 | 0.02  | Down | -2.7  | 0.01      | Down |  | -2.16 | 0.1  |      | -2.54 | 0.01  | Down | GTP binding Elongation factor Tu family protein        |     |
| Pc_TC134114 | 2.02  | 0     | Up   | 0     | 2.52E-006 |      |  | 1.6   | 0.14 |      | -0.11 | 0.91  |      | Expressed protein                                      |     |
| Pc_TC134117 | -0.86 | 0.41  |      | -0.06 | 1         |      |  | -3.14 | 0.06 |      | -3.02 | 0.02  | Down | Expressed protein                                      |     |
| Pc_TC134136 | 3.14  | 0.01  | Up   | 0     | 0.48      |      |  | 2.44  | 0.19 |      | 0     | 0.35  |      | Expressed protein                                      |     |
| Pc_TC134141 | -0.51 | 0.82  |      | 2.84  | 0.01      | Up   |  | -0.67 | 0.76 |      | -1.22 | 0.49  |      | ACT-like protein tyrosine kinase family protein        |     |
| Pc_TC134147 | 0.15  | 0.93  |      | -0.94 | 0.47      |      |  | 2.59  | 0.03 | Up   | 1.71  | 0.06  |      | Expressed protein                                      |     |
| Pc_TC134153 | 1.77  | 0.02  | Up   | 1.11  | 0.22      |      |  | 0.03  | 1    |      | 2.42  | 0     | Up   | Expressed protein                                      |     |
| Pc_TC134165 | -1.86 | 0.02  | Down | 0.38  | 0.64      |      |  | -1.76 | 0.15 |      | -0.87 | 0.31  |      | Expressed protein                                      |     |
| Pc_TC134186 | 0.03  | 1     |      | 1.23  | 0.17      |      |  | 0     | 0    |      | -4.18 | 0     | Down | Expressed protein                                      |     |
| Pc_TC134188 | -0.72 | 0.44  |      | -0.74 | 0.49      |      |  | 1.9   | 0.1  |      | 2.2   | 0.01  | Up   | LRR receptor-like serine/threonine-protein kinase GSO2 |     |
| Pc_TC134189 | -1.85 | 0     | Down | -0.57 | 0.39      |      |  | -0.06 | 0.96 |      | -1.07 | 0.13  |      | LRR receptor-like serine/threonine-protein kinase GSO2 |     |
| Pc_TC134209 | -0.67 | 0.45  |      | -0.2  | 0.86      |      |  | -2.12 | 0.13 |      | -2.58 | 0.02  | Down | Expressed protein                                      |     |
| Pc_TC134223 | 2.19  | 0.01  | Up   | 1.96  | 0.06      |      |  | -2.5  | 0.21 |      | 0.36  | 0.81  |      | Expressed protein                                      |     |
| Pc_TC134236 | -3.17 | 0.04  | Down | -2.6  | 0.09      |      |  | 0.93  | 0.49 |      | 0.51  | 0.65  |      | Expressed protein                                      |     |
| Pc_TC134240 | 2.54  | 0.01  | Up   | 0     | 0.11      |      |  | 1.31  | 0.41 |      | 0.08  | 1     |      | Expressed protein                                      |     |
| Pc_TC134276 | 1.87  | 0.05  | Up   | 0.69  | 0.62      |      |  | -0.5  | 0.81 |      | 1.38  | 0.22  |      | Putative transposase                                   |     |
| Pc_TC134288 | 1.62  | 0.02  | Up   | 1.96  | 0.01      | Up   |  | -0.91 | 0.5  |      | 1.95  | 0.02  | Up   | Protein of unknown function (DUF789)                   |     |
| Pc_TC134289 | -0.43 | 0.49  |      | -0.34 | 0.64      |      |  | -3.73 | 0    | Down | -2.61 | 0     | Down | Protein of unknown function (DUF789)                   |     |
| Pc_TC134291 | 0.13  | 0.86  |      | -2.21 | 0.01      | Down |  | 0.26  | 0.82 |      | -0.46 | 0.56  |      | Protein of unknown function (DUF789)                   |     |

|             |       |       |      |       |           |      |       |           |      |       |      |      |                                                                   |      |
|-------------|-------|-------|------|-------|-----------|------|-------|-----------|------|-------|------|------|-------------------------------------------------------------------|------|
| Pc_TC134304 | 3.02  | 0.02  | Up   | 0     | 0.48      |      | 2.96  | 0.09      |      | -0.37 | 1    |      | Expressed protein                                                 |      |
| Pc_TC134308 | 2.24  | 0.01  | Up   | 0     | 0.02      |      | 1.62  | 0.22      |      | 0.72  | 0.53 |      | NADH-ubiquinone oxidoreductase B18 subunit,putative               |      |
| Pc_TC134339 | 0.97  | 0.23  |      | 0.59  | 0.55      |      | 1.56  | 0.19      |      | 1.87  | 0.03 | Up   | Expressed protein                                                 | bHLH |
| Pc_TC134341 | 0.13  | 0.84  |      | 1.87  | 0         | Up   | -1.55 | 0.17      |      | -1.1  | 0.16 |      | Ribosomal protein L1p/L10e family                                 |      |
| Pc_TC134348 | 0.01  | 1     |      | 0.31  | 0.61      |      | -2.71 | 0.01      | Down | -1.42 | 0.04 | Down | Expressed protein                                                 |      |
| Pc_TC134357 | 0.47  | 0.25  |      | 0.5   | 0.33      |      | -2.06 | 0.04      | Down | -1.16 | 0.05 |      | Expressed protein                                                 |      |
| Pc_TC134362 | -0.09 | 0.97  |      | 0.47  | 0.65      |      | -1.25 | 0.38      |      | -2.54 | 0.04 | Down | Expressed protein                                                 |      |
| Pc_TC134365 | 0.23  | 0.8   |      | 0.72  | 0.42      |      | -4.08 | 0.01      | Down | 0.16  | 0.89 |      | Uncharacterized protein                                           |      |
| Pc_TC134376 | -1.17 | 0.04  | Down | -1.65 | 0.02      | Down | 1.13  | 0.24      |      | 0.34  | 0.61 |      | Expressed protein                                                 |      |
| Pc_TC134387 | 1.79  | 0.01  | Up   | 0     | 0         |      | 1.47  | 0.21      |      | -0.04 | 1    |      | ATP synthase alpha/beta family protein                            |      |
| Pc_TC134453 | 3.99  | 0.03  | Up   | 3.23  | 0.18      |      | 2.09  | 0.56      |      | 5.43  | 0    | Up   | Expressed protein                                                 |      |
| Pc_TC134454 | 1.77  | 0.09  |      | 1.35  | 0.28      |      | -0.5  | 0.84      |      | 2.66  | 0.01 | Up   | Expressed protein                                                 |      |
| Pc_TC134455 | -0.92 | 0.39  |      | -2.94 | 0.04      | Down | -0.99 | 0.49      |      | 0.29  | 0.8  |      | Expressed protein                                                 |      |
| Pc_TC134457 | -0.17 | 0.9   |      | 1.98  | 0.02      | Up   | 2.28  | 0.05      |      | 1.15  | 0.2  |      | Terpenoid cyclases/Protein prenyltransferases superfamily protein |      |
| Pc_TC134473 | -1.03 | 0.11  |      | -1.86 | 0.02      | Down | 0.47  | 0.66      |      | -1.16 | 0.13 |      | Os01g0316900 protein                                              |      |
| Pc_TC134475 | 2.4   | 0     | Up   | 0     | 0         |      | 1.23  | 0.31      |      | -0.84 | 0.43 |      | Translation initiation factor SUI1 family protein                 |      |
| Pc_TC134498 | 0.37  | 0.4   |      | 0.16  | 0.77      |      | -3.59 | 0         | Down | -0.87 | 0.16 |      | Expressed protein                                                 |      |
| Pc_TC134510 | 4.08  | 0.02  | Up   | 0     | 1         |      | 4.86  | 0.01      | Up   | 3.08  | 0.18 |      | Expressed protein                                                 |      |
| Pc_TC134542 | -0.05 | 1     |      | -2.94 | 0.04      | Down | -3.5  | 0.04      | Down | -1.96 | 0.11 |      | Uncharacterized protein                                           |      |
| Pc_TC134543 | 3.17  | ##### | Up   | 0     | 2.52E-006 |      | 3.06  | 0         | Up   | 1.17  | 0.11 |      | Expressed protein                                                 |      |
| Pc_TC134559 | 0.49  | 0.23  |      | 1.06  | 0.03      | Up   | -3.66 | 0         | Down | -2.42 | 0    | Down | Expressed protein                                                 |      |
| Pc_TC134563 | 1.24  | 0.12  |      | -1.26 | 0.3       |      | 2.18  | 0.06      |      | 2.13  | 0.01 | Up   | Expressed protein                                                 |      |
| Pc_TC134571 | 0.32  | 0.45  |      | 0.82  | 0.11      |      | -2.06 | 0.04      | Down | -0.63 | 0.3  |      | Expressed protein                                                 |      |
| Pc_TC134573 | -0.28 | 0.94  |      | 2.56  | 0.01      | Up   | -2.08 | 0.34      |      | -0.96 | 0.59 |      | Heat shock protein 70 (Hsp 70) family protein                     |      |
| Pc_TC134578 | 0.7   | 0.34  |      | 1.83  | 0.02      | Up   | 0     | 0         |      | -2.22 | 0.03 | Down | Expressed protein                                                 |      |
| Pc_TC134607 | 0.01  | 1     |      | 1.03  | 0.29      |      | -2.44 | 0.13      |      | -2.9  | 0.03 | Down | Expressed protein                                                 |      |
| Pc_TC134608 | 0.21  | 0.81  |      | 0.68  | 0.43      |      | -5.85 | 0         | Down | -1.73 | 0.09 |      | Peritrophic matrix insect intestinal mucin (Fragment)             |      |
| Pc_TC134609 | 3.81  | 0     | Up   | 0     | 0.36      |      | 1.67  | 0.38      |      | 0.95  | 0.64 |      | Expressed protein                                                 |      |
| Pc_TC134612 | -2.14 | 0.17  |      | -2.75 | 0.13      |      | -2.3  | 0.21      |      | -4.18 | 0.03 | Down | Ribosomal protein S5 family protein                               |      |
| Pc_TC134635 | 1.66  | 0.28  |      | 2.7   | 0.05      | Up   | 0     | 0.26      |      | -1.37 | 0.66 |      | Expressed protein                                                 |      |
| Pc_TC134641 | -0.94 | 0.1   |      | 0     | 1.85E-011 |      | -0.55 | 0.59      |      | -2.78 | 0    | Down | Expressed protein                                                 |      |
| Pc_TC134644 | 2.34  | 0     | Up   | 0     | 0         |      | 2.45  | 0.04      | Up   | 0.66  | 0.51 |      | Major facilitator superfamily protein                             |      |
| Pc_TC134645 | 2.4   | 0.19  |      | 3.31  | 0.04      | Up   | 1.31  | 0.68      |      | 0.21  | 1    |      | Expressed protein                                                 |      |
| Pc_TC134656 | -0.79 | 0.32  |      | -0.67 | 0.46      |      | -3.64 | 0.01      | Down | -3.1  | 0    | Down | Expressed protein                                                 |      |
| Pc_TC134657 | 1.7   | 0.01  | Up   | 0     | 0         |      | 1.14  | 0.33      |      | 0.22  | 0.83 |      | Expressed protein                                                 |      |
| Pc_TC134663 | -1.51 | 0.28  |      | 2.58  | 0         | Up   | 0     | 0.02      |      | -2.28 | 0.13 |      | Oxidoreductase,zinc-binding dehydrogenase family protein          |      |
| Pc_TC134669 | 0.35  | 0.46  |      | 0.87  | 0.12      |      | -2.37 | 0.03      | Down | -1.02 | 0.12 |      | Expressed protein                                                 |      |
| Pc_TC134671 | 0.79  | 0.3   |      | 1.47  | 0.07      |      | -3.34 | 0.03      | Down | -0.46 | 0.65 |      | Expressed protein                                                 |      |
| Pc_TC134683 | -0.14 | 0.74  |      | -1.17 | 0.03      | Down | 1.65  | 0.06      |      | 0.93  | 0.09 |      | Expressed protein                                                 |      |
| Pc_TC134715 | 0.02  | 1     |      | 1.68  | 0.05      | Up   | -4.25 | 0.02      | Down | 0.04  | 1    |      | Expressed protein                                                 |      |
| Pc_TC134734 | -0.2  | 0.78  |      | -0.03 | 0.99      |      | -3.02 | 0.02      | Down | -1.76 | 0.04 | Down | Expressed protein                                                 |      |
| Pc_TC134735 | 0.44  | 0.18  |      | 0.77  | 0.07      |      | -4.78 | 2.69E-006 | Down | -1.5  | 0.01 | Down | Putative uncharacterized protein Sb10g020018                      |      |
| Pc_TC134737 | -2.17 | 0.11  |      | -4.19 | 0.03      | Down | -3.74 | 0.05      | Down | 0     | 0    |      | Uncharacterized protein                                           |      |
| Pc_TC134738 | 0.15  | 0.84  |      | 1.16  | 0.11      |      | -2.01 | 0.1       |      | -3    | 0    | Down | Expressed protein                                                 |      |
| Pc_TC134747 | 1.48  | 0.14  |      | 0.18  | 0.96      |      | 3.62  | 0         | Up   | 2.99  | 0    | Up   | hydroxyproline-rich glycoprotein family protein                   |      |
| Pc_TC134782 | -0.31 | 0.53  |      | 0.15  | 0.79      |      | -1.51 | 0.14      |      | -1.99 | 0    | Down | Expressed protein                                                 |      |
| Pc_TC134783 | 0.64  | 0.38  |      | 0.99  | 0.22      |      | -3.15 | 0.03      | Down | -0.79 | 0.4  |      | Expressed protein                                                 |      |
| Pc_TC134786 | -0.18 | 0.82  |      | 0.42  | 0.61      |      | -5.4  | 0         | Down | -2.28 | 0.02 | Down | Expressed protein                                                 |      |
| Pc_TC134803 | -1.42 | 0.28  |      | 0.83  | 0.45      |      | 0     | 0.01      |      | -3.46 | 0.03 | Down | Expressed protein                                                 |      |
| Pc_TC134812 | 0.08  | 1     |      | 2.48  | 0.02      | Up   | 0     | 0.08      |      | 0.33  | 0.89 |      | Expressed protein                                                 |      |
| Pc_TC134817 | 2.3   | 0     | Up   | 0     | 0.01      |      | 1.69  | 0.18      |      | -0.46 | 0.73 |      | LYR family of Fe/S cluster biogenesis protein                     |      |
| Pc_TC134820 | -2.24 | 0.04  | Down | 0.11  | 0.95      |      | 1.75  | 0.14      |      | 1.45  | 0.09 |      | Expressed protein                                                 |      |
| Pc_TC134829 | 1.08  | 0.19  |      | 1.9   | 0.03      | Up   | -0.76 | 0.6       |      | 0.4   | 0.71 |      | Ribosomal L22e protein family                                     |      |
| Pc_TC134830 | 2.83  | ##### | Up   | 0     | 0         |      | 1.69  | 0.17      |      | -0.13 | 0.94 |      | Expressed protein                                                 |      |
| Pc_TC134857 | 0.08  | 1     |      | 3.96  | 0.01      | Up   | 2.2   | 0.34      |      | 3.98  | 0    | Up   | cysteine-rich RLK (RECEPTOR-like protein kinase) 8                |      |
| Pc_TC134871 | 0.62  | 0.63  |      | 2.3   | 0.02      | Up   | -1.96 | 0.32      |      | -2.83 | 0.12 |      | Ribosomal protein S5/Elongation factor G/III/V family protein     |      |
| Pc_TC134881 | 0.14  | 0.93  |      | 0.56  | 0.59      |      | -4.08 | 0.03      | Down | -2.37 | 0.06 |      | syntaxin of plants 52                                             |      |
| Pc_TC134895 | 3.83  | 0     | Up   | 0     | 0.36      |      | 2.59  | 0.12      |      | -0.37 | 0.99 |      | Expressed protein                                                 |      |
| Pc_TC134901 | -0.01 | 1     |      | 1     | 0.09      |      | -2.79 | 0.01      | Down | -2.54 | 0    | Down | Expressed protein                                                 |      |
| Pc_TC134913 | 1.61  | 0.12  |      | 2.16  | 0.04      | Up   | -1.82 | 0.37      |      | -0.37 | 0.86 |      | Expressed protein                                                 |      |
| Pc_TC134948 | -0.66 | 0.72  |      | -2.26 | 0.27      |      | 2.69  | 0.04      | Up   | 1.39  | 0.23 |      | Expressed protein                                                 |      |
| Pc_TC134958 | -2.68 | 0.03  | Down | -0.89 | 0.44      |      | -0.61 | 0.67      |      | -0.32 | 0.78 |      | Uncharacterized protein                                           |      |

|             |       |       |      |       |           |      |       |           |      |       |       |      |                                                 |            |
|-------------|-------|-------|------|-------|-----------|------|-------|-----------|------|-------|-------|------|-------------------------------------------------|------------|
| Pc_TC134960 | -0.37 | 0.63  |      | 0.38  | 0.65      |      | -3.08 | 0.02      | Down | -1.07 | 0.22  |      | Expressed protein                               |            |
| Pc_TC134964 | 1.52  | 0.01  | Up   | 0     | 6.86E-006 |      | 1.55  | 0.15      |      | -0.35 | 0.68  |      | Expressed protein                               |            |
| Pc_TC134980 | 5.08  | 0.01  | Up   | 0     |           |      | 4.67  | 0.02      | Up   | 2.63  | 0.32  |      | Expressed protein                               |            |
| Pc_TC134983 | 1.28  | 0.19  |      | 2.59  | 0.01      | Up   | 0     | 0.03      |      | -2.08 | 0.19  |      | Expressed protein                               |            |
| Pc_TC135006 | -1.87 | 0.09  |      | -3.7  | 0.01      | Down | -1.25 | 0.38      |      | -0.61 | 0.58  |      | Expressed protein                               |            |
| Pc_TC135023 | 2.74  | 0.05  | Up   | 2.28  | 0.17      |      | -2.08 | 0.63      |      | -1.96 | 0.63  |      | Expressed protein                               | Alfin-like |
| Pc_TC135084 | -2.51 | 0.05  | Down | -0.72 | 0.55      |      | 0.28  | 0.86      |      | -0.15 | 0.92  |      | Expressed protein                               |            |
| Pc_TC135128 | -0.92 | 0.55  |      | 0.38  | 0.82      |      | 2.91  | 0.02      | Up   | 2.34  | 0.02  | Up   | Expressed protein                               |            |
| Pc_TC135135 | -1.59 | 0.04  | Down | -0.49 | 0.56      |      | -0.13 | 0.92      |      | -0.92 | 0.27  |      | Expressed protein                               |            |
| Pc_TC135143 | 1.08  | 0.29  |      | 2.11  | 0.03      | Up   | 0.26  | 0.9       |      | 0.45  | 0.74  |      | Expressed protein                               |            |
| Pc_TC135149 | -2.24 | 0.14  |      | -1.04 | 0.49      |      | -1.6  | 0.35      |      | -4.28 | 0.02  | Down | Expressed protein                               |            |
| Pc_TC135155 | 0.08  | 0.98  |      | -0.39 | 0.75      |      | -4.2  | 0.02      | Down | -1.49 | 0.19  |      | Expressed protein                               |            |
| Pc_TC135174 | 3.49  | 0     | Up   | 0     | 0.2       |      | 2.73  | 0.06      |      | 0.85  | 0.61  |      | Expressed protein                               |            |
| Pc_TC135176 | 0.49  | 0.83  |      | 2.64  | 0.03      | Up   | 1.31  | 0.45      |      | -0.15 | 1     |      | Expressed protein                               |            |
| Pc_TC135177 | 0.79  | 0.23  |      | 0.9   | 0.23      |      | -3.3  | 0.02      | Down | 0.04  | 0.98  |      | Expressed protein                               |            |
| Pc_TC135218 | 3.99  | 0.03  | Up   | 2.38  | 0.46      |      | 2.09  | 0.56      |      | 1.63  | 0.71  |      | Expressed protein                               |            |
| Pc_TC135231 | -2.42 | 0.1   |      | -2.03 | 0.18      |      | -4.58 | 0.03      | Down | 0     | 0     |      | mitochondrial heat shock protein 70-1           |            |
| Pc_TC135233 | 0.55  | 0.1   |      | 0.7   | 0.1       |      | -2.87 | 0         | Down | -1.48 | 0.01  | Down | Expressed protein                               |            |
| Pc_TC135234 | 2.26  | 0     | Up   | 0     | 6.30E-005 |      | 2.4   | 0.03      | Up   | 0.7   | 0.4   |      | aminopeptidase M1                               |            |
| Pc_TC135249 | -0.57 | 0.48  |      | 0.34  | 0.69      |      | -1.39 | 0.27      |      | -2.21 | 0.03  | Down | Putative mutator-like transposase               |            |
| Pc_TC135267 | 0.53  | 0.3   |      | 0.87  | 0.15      |      | 0     | 9.99E-008 |      | -3.79 | ##### | Down | Expressed protein                               |            |
| Pc_TC135287 | 2.22  | 0.07  |      | 3.16  | 0.01      | Up   | -2.82 | 0.37      |      | 0.63  | 0.78  |      | Expressed protein                               |            |
| Pc_TC135289 | -4.73 | 0     | Down | -3.75 | 0.01      | Down | 0.7   | 0.59      |      | -0.72 | 0.5   |      | Expressed protein                               |            |
| Pc_TC135293 | 2.25  | 0.03  | Up   | 0     | 0.11      |      | 3.23  | 0.02      | Up   | 1.71  | 0.15  |      | Expressed protein                               |            |
| Pc_TC135302 | 3.12  | 0     | Up   | 0     | 0.11      |      | 2.09  | 0.15      |      | 0.43  | 0.82  |      | seryl-tRNA synthetase / serine-tRNA ligase      |            |
| Pc_TC135305 | -0.44 | 0.64  |      | -0.53 | 0.62      |      | -3.96 | 0.02      | Down | -1.51 | 0.15  |      | Expressed protein                               |            |
| Pc_TC135326 | -1.14 | 0.42  |      | 0.06  | 1         |      | -2.72 | 0.16      |      | -4.18 | 0.03  | Down | Expressed protein                               |            |
| Pc_TC135327 | -0.37 | 0.81  |      | -1.85 | 0.24      |      | -4.4  | 0.05      | Down | -0.96 | 0.48  |      | Expressed protein                               |            |
| Pc_TC135335 | 0.37  | 0.7   |      | 0.06  | 1         |      | -5.25 | 0.01      | Down | -3.54 | 0.01  | Down | Expressed protein                               |            |
| Pc_TC135366 | 0.78  | 0.34  |      | 1.71  | 0.04      | Up   | -0.35 | 0.81      |      | -0.19 | 0.88  |      | ribosomal protein L23AB                         |            |
| Pc_TC135371 | -0.57 | 0.61  |      | -0.15 | 0.94      |      | -3.96 | 0.03      | Down | -3.25 | 0.02  | Down | Expressed protein                               |            |
| Pc_TC135391 | -0.56 | 0.51  |      | 0.75  | 0.37      |      | -3.08 | 0.03      | Down | -1.68 | 0.09  |      | Expressed protein                               |            |
| Pc_TC135398 | 0.49  | 0.96  |      | 2.93  | 0.05      | Up   | 0.92  | 0.76      |      | 1.74  | 0.33  |      | Expressed protein                               |            |
| Pc_TC135400 | 0.13  | 0.85  |      | -0.17 | 0.83      |      | -2.96 | 0.01      | Down | -0.68 | 0.37  |      | Putative uncharacterized protein                |            |
| Pc_TC135404 | -2.29 | 0.04  | Down | -0.57 | 0.6       |      | 1.26  | 0.29      |      | 0.13  | 0.92  |      | Expressed protein                               |            |
| Pc_TC135445 | -1.43 | 0.04  | Down | -0.36 | 0.64      |      | 1.41  | 0.17      |      | -0.15 | 0.85  |      | putative unclassified expressed                 |            |
| Pc_TC135473 | -0.21 | 0.96  |      | -0.4  | 0.85      |      | 4.63  | 0         | Up   | 3     | 0     | Up   | Expressed protein                               |            |
| Pc_TC135482 | 0.36  | 0.33  |      | 0.24  | 0.62      |      | -2.39 | 0.01      | Down | -0.85 | 0.14  |      | Expressed protein                               |            |
| Pc_TC135483 | 0.28  | 0.86  |      | 3.07  | 0         | Up   | -0.61 | 0.74      |      | -0.91 | 0.54  |      | Expressed protein                               |            |
| Pc_TC135486 | -0.14 | 0.82  |      | -2.74 | 0         | Down | -1.67 | 0.13      |      | -2.06 | 0.01  | Down | Expressed protein                               |            |
| Pc_TC135498 | 1.71  | 0.03  | Up   | 1.33  | 0.16      |      | -2.37 | 0.14      |      | -0.08 | 0.98  |      | Expressed protein                               |            |
| Pc_TC135523 | -0.75 | 0.36  |      | -3.2  | 0.01      | Down | 0.79  | 0.49      |      | 0.31  | 0.73  |      | Expressed protein                               |            |
| Pc_TC135525 | 0.42  | 0.26  |      | 0.61  | 0.2       |      | -2.98 | 0         | Down | -1.92 | 0     | Down | Expressed protein                               |            |
| Pc_TC135526 | -3.04 | 0.02  | Down | -1.32 | 0.27      |      | 0.09  | 0.98      |      | -0.99 | 0.37  |      | Expressed protein                               |            |
| Pc_TC135533 | -2.55 | 0.02  | Down | -4.15 | 0         | Down | -3.12 | 0.04      | Down | -2.26 | 0.04  | Down | ADP/ATP carrier 2                               |            |
| Pc_TC135599 | -3.92 | 0.03  | Down | -2.94 | 0.09      |      | 0.09  | 0.99      |      | -0.37 | 0.8   |      | Expressed protein                               |            |
| Pc_TC135607 | 1.23  | 0.2   |      | 2.52  | 0.01      | Up   | -0.84 | 0.63      |      | -0.18 | 0.94  |      | Expressed protein                               |            |
| Pc_TC135609 | 1.08  | 0.27  |      | 1.06  | 0.33      |      | -4.4  | 0.05      | Down | -1.11 | 0.42  |      | Expressed protein                               |            |
| Pc_TC135618 | 1.98  | 0     | Up   | 0     | 2.23E-006 |      | 0.61  | 0.58      |      | -0.69 | 0.41  |      | RNA-binding (RRM/RBD/RNP motifs) family protein |            |
| Pc_TC135625 | -4.44 | ##### | Down | -3.8  | 1.64E-005 | Down | -5.23 | 0         | Down | -5.37 | ##### | Down | Expressed protein                               |            |
| Pc_TC135629 | 1.93  | 0.05  | Up   | 0     | 0.07      |      | 0.18  | 0.97      |      | 0.21  | 0.94  |      | Expressed protein                               |            |
| Pc_TC135636 | -0.97 | 0.14  |      | -2.07 | 0.01      | Down | -1.52 | 0.18      |      | -2.75 | 0     | Down | Expressed protein                               |            |
| Pc_TC135638 | -3.42 | 0     | Down | -1.33 | 0.22      |      | 0.66  | 0.59      |      | -0.07 | 0.97  |      | NBS-LRR (Fragment)                              |            |
| Pc_TC135640 | -0.1  | 0.89  |      | -2.08 | 0.01      | Down | 0.92  | 0.37      |      | 0.44  | 0.53  |      | NBS-LRR (Fragment)                              |            |
| Pc_TC135644 | 2.4   | 0.02  | Up   | 0     | 0.15      |      | 1.02  | 0.56      |      | -2.18 | 0.32  |      | Expressed protein                               |            |
| Pc_TC135670 | 1.53  | 0.13  |      | 2.73  | 0.01      | Up   | 0.74  | 0.64      |      | -0.03 | 1     |      | Expressed protein                               |            |
| Pc_TC135674 | -1.92 | 0.36  |      | 1.58  | 0.21      |      | 3.88  | 0         | Up   | 0.53  | 0.75  |      | Expressed protein                               |            |
| Pc_TC135683 | 0.21  | 0.87  |      | 0.57  | 0.6       |      | -2.89 | 0.09      |      | -2.77 | 0.04  | Down | Putative uncharacterized protein                |            |
| Pc_TC135707 | -0.64 | 0.43  |      | 1.6   | 0.03      | Up   | 0.47  | 0.69      |      | -1.59 | 0.09  |      | Expressed protein                               |            |
| Pc_TC135717 | 2.96  | ##### | Up   | 0     | 0.02      |      | 2.9   | 0.02      | Up   | 1.97  | 0.04  | Up   | Expressed protein                               |            |
| Pc_TC135720 | 0.82  | 0.36  |      | 1.93  | 0.03      | Up   | -2.3  | 0.15      |      | -0.96 | 0.42  |      | Expressed protein                               |            |
| Pc_TC135724 | 2.54  | 0     | Up   | 0     | 0         |      | 2.28  | 0.05      |      | 0.74  | 0.44  |      | Expressed protein                               |            |

|             |       |      |      |       |      |      |       |      |      |       |       |      |                                                                     |             |
|-------------|-------|------|------|-------|------|------|-------|------|------|-------|-------|------|---------------------------------------------------------------------|-------------|
| Pc_TC135726 | -0.45 | 0.69 |      | 0.74  | 0.46 |      | -5.02 | 0.01 | Down | -3.9  | 0.01  | Down | Expressed protein                                                   |             |
| Pc_TC135756 | 0.27  | 0.66 |      | -0.02 | 1    |      | -3.72 | 0    | Down | -1.68 | 0.03  | Down | Thiamin diphosphate-binding fold (THDP-binding) superfamily protein |             |
| Pc_TC135777 | 0.08  | 1    |      | 2.36  | 0.01 | Up   | -0.74 | 0.68 |      | -0.17 | 0.96  |      | Expressed protein                                                   |             |
| Pc_TC135808 | -1.07 | 0.28 |      | -1.31 | 0.24 |      | 2.32  | 0.04 | Up   | 0.99  | 0.26  |      | Expressed protein                                                   |             |
| Pc_TC135809 | 0.47  | 0.53 |      | 1.01  | 0.21 |      | -2.99 | 0.04 | Down | -1.62 | 0.1   |      | UniRef100                                                           |             |
| Pc_TC135815 | 1.66  | 0.48 |      | 3.45  | 0.03 | Up   | -0.5  | 1    |      | 0.63  | 0.96  |      | Expressed protein                                                   |             |
| Pc_TC135818 | 0.35  | 0.6  |      | 1.24  | 0.08 |      | -3.59 | 0.01 | Down | -3.83 | 0     | Down | Expressed protein                                                   |             |
| Pc_TC135819 | 2.48  | 0.02 | Up   | 0     | 0.15 |      | 3.12  | 0.02 | Up   | 0.52  | 0.78  |      | Expressed protein                                                   |             |
| Pc_TC135826 | -0.38 | 0.65 |      | -0.07 | 0.97 |      | -2.08 | 0.11 |      | -5.96 | ##### | Down | Expressed protein                                                   |             |
| Pc_TC135827 | -0.25 | 0.69 |      | 0.47  | 0.49 |      | -1.55 | 0.16 |      | -1.72 | 0.03  | Down | Expressed protein                                                   |             |
| Pc_TC135828 | -0.08 | 0.94 |      | 2.28  | 0    | Up   | -1.59 | 0.22 |      | 0.59  | 0.48  |      | DNA-binding bromodomain-containing protein                          | Bromodomain |
| Pc_TC135838 | -0.85 | 0.46 |      | 0.25  | 0.85 |      | -2.89 | 0.09 |      | -3.18 | 0.03  | Down | Expressed protein                                                   |             |
| Pc_TC135856 | 0.43  | 0.48 |      | -0.24 | 0.76 |      | 3.5   | 0    | Up   | 1.37  | 0.05  | Up   | Expressed protein                                                   |             |
| Pc_TC135859 | 0.25  | 0.75 |      | 0.95  | 0.22 |      | -1.87 | 0.14 |      | -2.04 | 0.03  | Down | Putative uncharacterized protein Sb03g046332                        |             |
| Pc_TC135860 | -3.68 | 0.01 | Down | -0.53 | 0.65 |      | -0.04 | 1    |      | -1.81 | 0.12  |      | Expressed protein                                                   |             |
| Pc_TC135873 | 1.99  | 0.01 | Up   | 0     | 0    |      | 1.47  | 0.24 |      | -0.83 | 0.48  |      | Mitochondrial substrate carrier family protein                      |             |
| Pc_TC135877 | 0.66  | 0.81 |      | 0.06  | 1    |      | 3.46  | 0.02 | Up   | 1.87  | 0.21  |      | Expressed protein                                                   |             |
| Pc_TC135889 | 3.1   | 0    | Up   | 0     | 0.11 |      | 2.15  | 0.14 |      | 1.33  | 0.29  |      | Expressed protein                                                   |             |
| Pc_TC135914 | 1.47  | 0.06 |      | 1.93  | 0.02 | Up   | -1.17 | 0.42 |      | 2.52  | 0     | Up   | Expressed protein                                                   |             |
| Pc_TC135922 | 0.04  | 1    |      | 0.63  | 0.48 |      | -3.12 | 0.04 | Down | -1.34 | 0.19  |      | Expressed protein                                                   |             |
| Pc_TC135926 | 3.03  | 0.01 | Up   | 0     | 0.36 |      | 2.5   | 0.13 |      | -0.37 | 0.99  |      | Glycine cleavage T-protein family                                   |             |
| Pc_TC135936 | -0.51 | 0.72 |      | 0.06  | 1    |      | 1.86  | 0.15 |      | 2.02  | 0.03  | Up   | Expressed protein                                                   |             |
| Pc_TC135960 | -0.34 | 1    |      | 0     | 0.36 |      | 3.39  | 0.03 | Up   | 1.63  | 0.31  |      | Expressed protein                                                   |             |
| Pc_TC135972 | -0.29 | 0.75 |      | 0.41  | 0.66 |      | -4.82 | 0    | Down | -1.53 | 0.13  |      | Expressed protein                                                   |             |
| Pc_TC135976 | -0.02 | 1    |      | 1.85  | 0.02 | Up   | -5.4  | 0.01 | Down | -2.96 | 0.02  | Down | Putative glucose dehydrogenase                                      |             |
| Pc_TC135979 | 0.05  | 0.98 |      | 0.92  | 0.25 |      | -2.94 | 0.03 | Down | -1.99 | 0.04  | Down | Expressed protein                                                   |             |
| Pc_TC135991 | 1.95  | 0.02 | Up   | 0     | 0.01 |      | 1.72  | 0.18 |      | -0.29 | 0.85  |      | Expressed protein                                                   |             |
| Pc_TC136000 | 0.79  | 0.19 |      | 0.1   | 0.9  |      | 2.46  | 0.02 | Up   | 0.86  | 0.23  |      | Expressed protein                                                   |             |
| Pc_TC136003 | 0.47  | 0.53 |      | 0.15  | 0.89 |      | -3.5  | 0.02 | Down | -2.26 | 0.02  | Down | Expressed protein                                                   |             |
| Pc_TC136006 | -2.19 | 0.05 | Down | 0.29  | 0.79 |      | 0.23  | 0.88 |      | 0.02  | 1     |      | Uncharacterized protein (Fragment)                                  |             |
| Pc_TC136041 | 0.19  | 0.87 |      | -0.53 | 0.67 |      | -2.76 | 0.09 |      | -3.96 | 0.01  | Down | Expressed protein                                                   |             |
| Pc_TC136065 | 3.4   | 0.1  |      | 2.38  | 0.46 |      | 2.83  | 0.32 |      | 3.87  | 0.04  | Up   | Expressed protein                                                   |             |
| Pc_TC136082 | -0.76 | 0.19 |      | -1.99 | 0.01 | Down | -0.34 | 0.75 |      | -1.37 | 0.06  |      | guanyl-nucleotide exchange factors;GTPase binding;GTP binding       |             |
| Pc_TC136109 | -1.02 | 0.3  |      | -1.26 | 0.26 |      | -1.82 | 0.2  |      | -2.28 | 0.05  | Down | Expressed protein                                                   |             |
| Pc_TC136132 | 0.05  | 0.99 |      | -1.63 | 0.11 |      | 2.6   | 0.02 | Up   | 1.43  | 0.07  |      | Expressed protein                                                   |             |
| Pc_TC136152 | 1.66  | 0.08 |      | 2.56  | 0.01 | Up   | -0.62 | 0.74 |      | -1.15 | 0.45  |      | Expressed protein                                                   |             |
| Pc_TC136153 | -0.08 | 0.97 |      | 0.3   | 0.79 |      | -3.3  | 0.04 | Down | -1.37 | 0.21  |      | Expressed protein                                                   |             |
| Pc_TC136170 | 0.85  | 0.3  |      | -0.45 | 0.7  |      | -4.25 | 0.02 | Down | 0.8   | 0.39  |      | Expressed protein                                                   |             |
| Pc_TC136179 | -1.03 | 0.15 |      | -1.98 | 0.02 | Down | 1.42  | 0.18 |      | 0.47  | 0.54  |      | Expressed protein                                                   |             |
| Pc_TC136200 | -0.92 | 0.46 |      | -4.11 | 0.03 | Down | -0.27 | 0.88 |      | -1.09 | 0.39  |      | Expressed protein                                                   |             |
| Pc_TC136209 | 2.49  | 0    | Up   | 0     | 0    |      | 1.44  | 0.25 |      | 0.34  | 0.77  |      | Expressed protein                                                   |             |
| Pc_TC136250 | 0.1   | 0.75 |      | -0.05 | 0.9  |      | -2.86 | 0    | Down | -1.53 | 0     | Down | Uncharacterized protein                                             |             |
| Pc_TC136302 | 1.25  | 0.48 |      | 3.7   | 0    | Up   | -1.5  | 0.66 |      | -0.05 | 1     |      | Expressed protein                                                   |             |
| Pc_TC136310 | -0.85 | 0.19 |      | -2.15 | 0.01 | Down | -4.6  | 0    | Down | -2.89 | 0     | Down | Expressed protein                                                   |             |
| Pc_TC136315 | -1.92 | 0.59 |      | -0.36 | 1    |      | 3.55  | 0.02 | Up   | 1.8   | 0.24  |      | Expressed protein                                                   |             |
| Pc_TC136360 | 0.11  | 0.88 |      | 0.68  | 0.35 |      | -2.45 | 0.05 | Down | -1.36 | 0.1   |      | Expressed protein                                                   |             |
| Pc_TC136384 | -0.02 | 1    |      | 0.86  | 0.21 |      | -5.26 | 0    | Down | -3.97 | ##### | Down | Expressed protein                                                   |             |
| Pc_TC136411 | -2.09 | 0.07 |      | -0.79 | 0.49 |      | -4.25 | 0.02 | Down | -1.22 | 0.27  |      | Uncharacterized protein                                             |             |
| Pc_TC136437 | -1.34 | 0.5  |      | 2.76  | 0.01 | Up   | -0.5  | 0.85 |      | -0.37 | 0.89  |      | Expressed protein                                                   |             |
| Pc_TC136444 | -0.03 | 1    |      | 2.11  | 0.03 | Up   | 0.6   | 0.7  |      | 0.34  | 0.81  |      | cysteine-rich RLK (RECEPTOR-like protein kinase) 8                  |             |
| Pc_TC136461 | 1.86  | 0.1  |      | 2.77  | 0.01 | Up   | -0.72 | 0.78 |      | 0.14  | 1     |      | general regulatory factor 2                                         |             |
| Pc_TC136475 | -1.64 | 0.04 | Down | -1.73 | 0.06 |      | 0.2   | 0.87 |      | -0.81 | 0.33  |      | DEAD/DEAH box RNA helicase family protein                           |             |
| Pc_TC136476 | 0.22  | 0.75 |      | 0.72  | 0.33 |      | -1.57 | 0.19 |      | -2.14 | 0.02  | Down | Expressed protein                                                   |             |
| Pc_TC136527 | -2.21 | 0.03 | Down | -1.77 | 0.1  |      | 0.5   | 0.68 |      | -0.75 | 0.44  |      | Os09g0484900 protein                                                |             |
| Pc_TC136547 | -0.82 | 0.35 |      | 0.43  | 0.64 |      | -3.85 | 0.01 | Down | -1.92 | 0.06  |      | Expressed protein                                                   |             |
| Pc_TC136577 | 2.82  | 0.04 | Up   | 0.47  | 0.98 |      | 3.24  | 0.05 |      | 2.5   | 0.1   |      | Expressed protein                                                   |             |
| Pc_TC136578 | 0.32  | 0.86 |      | 2.09  | 0.05 | Up   | -2.37 | 0.25 |      | -0.03 | 1     |      | Expressed protein                                                   |             |
| Pc_TC136604 | -0.23 | 0.85 |      | 1.06  | 0.25 |      | -2.2  | 0.15 |      | -4.08 | 0.01  | Down | Expressed protein                                                   |             |
| Pc_TC136605 | -0.77 | 0.53 |      | 1.35  | 0.17 |      | -3.67 | 0.06 |      | -4.54 | 0.01  | Down | Expressed protein                                                   |             |
| Pc_TC136619 | 0.24  | 0.76 |      | 0.17  | 0.86 |      | -4.14 | 0.01 | Down | -1.93 | 0.05  | Down | Polyprotein                                                         |             |
| Pc_TC136639 | 1.46  | 0.32 |      | 3.82  | 0    | Up   | 0.77  | 0.74 |      | 2.73  | 0.02  | Up   | Expressed protein                                                   |             |
| Pc_TC136640 | -0.35 | 0.69 |      | 0.72  | 0.4  |      | -4.34 | 0.01 | Down | -0.94 | 0.32  |      | Expressed protein                                                   |             |



|             |       |       |      |       |           |      |       |      |      |       |      |      |                                                                         |
|-------------|-------|-------|------|-------|-----------|------|-------|------|------|-------|------|------|-------------------------------------------------------------------------|
| Pc_TC136641 | 0.03  | 0.98  |      | 1.2   | 0.08      |      | -4.05 | 0    | Down | -1.54 | 0.06 |      | Expressed protein                                                       |
| Pc_TC136642 | 1.44  | 0.01  | Up   | 1.46  | 0.03      | Up   | -2.03 | 0.09 |      | -0.37 | 0.64 |      | Expressed protein                                                       |
| Pc_TC136686 | 1.52  | 0.04  | Up   | 0     | 0         |      | 1.39  | 0.25 |      | -0.71 | 0.5  |      | aminopeptidase M1                                                       |
| Pc_TC136696 | 2.16  | 0     | Up   | 0     | 7.32E-005 |      | 1.94  | 0.08 |      | 0.85  | 0.3  |      | Zinc-binding ribosomal protein family protein                           |
| Pc_TC136716 | 1.6   | 0.04  | Up   | 0     | 0         |      | 2.28  | 0.05 |      | -2.37 | 0.06 |      | Expressed protein                                                       |
| Pc_TC136719 | 3.29  | 0     | Up   | 0     | 0.36      |      | 3.09  | 0.05 | Up   | 2.33  | 0.09 |      | NADH-ubiquinone dehydrogenase,mitochondrial,putative                    |
| Pc_TC136720 | 0.31  | 0.64  |      | 0.92  | 0.2       |      | -2.99 | 0.02 | Down | 0.35  | 0.65 |      | Expressed protein                                                       |
| Pc_TC136737 | 1.84  | 0     | Up   | 0     | 6.03E-006 |      | 1.83  | 0.09 |      | 0.17  | 0.85 |      | Expressed protein                                                       |
| Pc_TC136750 | 0.21  | 0.77  |      | 0.23  | 0.78      |      | -3.1  | 0.02 | Down | -2.39 | 0.01 | Down | Expressed protein                                                       |
| Pc_TC136755 | -2.35 | 0.04  | Down | -0.37 | 0.76      |      | -2.25 | 0.14 |      | -0.96 | 0.38 |      | Expressed protein                                                       |
| Pc_TC136765 | 0.54  | 0.21  |      | 0.41  | 0.45      |      | -2.72 | 0.01 | Down | -1.39 | 0.03 | Down | Expressed protein                                                       |
| Pc_TC136772 | 0.78  | 0.59  |      | 0.52  | 0.78      |      | 2.88  | 0.04 | Up   | 1.98  | 0.08 |      | Expressed protein                                                       |
| Pc_TC136778 | 0.08  | 1     |      | 3.31  | 0.04      | Up   | -0.5  | 1    |      | 0.63  | 0.96 |      | Expressed protein                                                       |
| Pc_TC136779 | 0.89  | 0.33  |      | 2.45  | 0         | Up   | -2.23 | 0.17 |      | -0.89 | 0.46 |      | Expressed protein                                                       |
| Pc_TC136781 | -1.51 | 0.54  |      | 2.93  | 0.01      | Up   | -2.08 | 0.43 |      | -0.37 | 0.93 |      | Expressed protein                                                       |
| Pc_TC136787 | 1.9   | 0.04  | Up   | 0.85  | 0.52      |      | -2.96 | 0.17 |      | 1.34  | 0.23 |      | Uncharacterized protein                                                 |
| Pc_TC136861 | 3.35  | 0     | Up   | 0     | 0.2       |      | 1.92  | 0.23 |      | 1.21  | 0.41 |      | Expressed protein                                                       |
| Pc_TC136865 | 2.99  | ##### | Up   | 0     | 0.01      |      | 3.25  | 0.01 | Up   | 1.12  | 0.27 |      | manganese superoxide dismutase 1                                        |
| Pc_TC136867 | 2.08  | 0.04  | Up   | 0     | 0.11      |      | 2.15  | 0.14 |      | 0.08  | 1    |      | Expressed protein                                                       |
| Pc_TC136868 | -1.88 | 0.07  |      | -1.73 | 0.14      |      | -4.45 | 0.01 | Down | -3.74 | 0    | Down | ATP synthase subunit alpha                                              |
| Pc_TC136872 | -0.11 | 0.88  |      | 0.12  | 0.88      |      | -3.64 | 0    | Down | -1.71 | 0.03 | Down | Expressed protein                                                       |
| Pc_TC136873 | 0.93  | 0.25  |      | 2.04  | 0.01      | Up   | -0.29 | 0.85 |      | -0.32 | 0.78 |      | Os09g0497700 protein                                                    |
| Pc_TC136877 | 1.22  | 0.06  |      | 1.62  | 0.03      | Up   | -1.63 | 0.19 |      | 0.15  | 0.87 |      | Expressed protein                                                       |
| Pc_TC136885 | -0.11 | 0.94  |      | 0.42  | 0.67      |      | -1.91 | 0.18 |      | -2.37 | 0.04 | Down | 60S ribosomal protein L18A-1                                            |
| Pc_TC136888 | -0.66 | 0.58  |      | -0.26 | 0.87      |      | -3.82 | 0.04 | Down | -1.11 | 0.36 |      | Expressed protein                                                       |
| Pc_TC136900 | 0.08  | 1     |      | -0.36 | 0.92      |      | 2.96  | 0.03 | Up   | 1.95  | 0.09 |      | Expressed protein                                                       |
| Pc_TC136920 | 1.66  | 0.28  |      | 2.7   | 0.05      | Up   | 1.59  | 0.41 |      | 1.33  | 0.44 |      | Expressed protein                                                       |
| Pc_TC136925 | 0.58  | 0.28  |      | 0.25  | 0.71      |      | -2.58 | 0.02 | Down | -0.64 | 0.37 |      | Expressed protein                                                       |
| Pc_TC136931 | 0.21  | 0.87  |      | 1.82  | 0.04      | Up   | -3.89 | 0.04 | Down | -1.77 | 0.16 |      | Expressed protein                                                       |
| Pc_TC136956 | 0.02  | 1     |      | 2.25  | 0         | Up   | -1.35 | 0.29 |      | -2.61 | 0.01 | Down | Expressed protein                                                       |
| Pc_TC136958 | -0.86 | 0.3   |      | -2.72 | 0.01      | Down | 1.59  | 0.15 |      | 0.71  | 0.38 |      | Expressed protein                                                       |
| Pc_TC136980 | -0.24 | 1     |      | -1.26 | 0.7       |      | 3.18  | 0.03 | Up   | 0.89  | 0.63 |      | Guanine nucleotide-binding protein subunit gamma                        |
| Pc_TC136981 | 2.6   | 0.01  | Up   | 0     | 0.11      |      | 2.88  | 0.04 | Up   | 0.8   | 0.58 |      | Expressed protein                                                       |
| Pc_TC136983 | -0.32 | 0.66  |      | 0.78  | 0.29      |      | -1.58 | 0.19 |      | -2.78 | 0    | Down | Expressed protein                                                       |
| Pc_TC137015 | -2.51 | 0     | Down | -0.83 | 0.33      |      | 0.06  | 0.97 |      | -0.9  | 0.28 |      | Putative polyprotein                                                    |
| Pc_TC137016 | 1.76  | 0.03  | Up   | 1.26  | 0.19      |      | -0.12 | 0.97 |      | -1.11 | 0.36 |      | Expressed protein                                                       |
| Pc_TC137026 | 1.09  | 0.05  | Up   | 0.45  | 0.51      |      | -1.22 | 0.27 |      | -0.92 | 0.22 |      | Expressed protein                                                       |
| Pc_TC137043 | 0     | 0.05  |      | 0.98  | 0.45      |      | 2.64  | 0.05 | Up   | 1.51  | 0.18 |      | 2-oxoglutarate (2OG) and Fe(II)-dependent oxygenase superfamily protein |
| Pc_TC137066 | 0.42  | 0.53  |      | 0.62  | 0.42      |      | -1.87 | 0.13 |      | -1.86 | 0.04 | Down | Uncharacterized protein                                                 |
| Pc_TC137069 | -0.17 | 0.89  |      | -0.19 | 0.88      |      | 1.98  | 0.09 |      | 1.65  | 0.05 | Up   | Expressed protein                                                       |
| Pc_TC137074 | 1.08  | 0.4   |      | 2.38  | 0.03      | Up   | 0.09  | 1    |      | 0.43  | 0.82 |      | Expressed protein                                                       |
| Pc_TC137076 | -3.97 | 0     | Down | -2.18 | 0.07      |      | 1.27  | 0.28 |      | -0.46 | 0.65 |      | Expressed protein                                                       |
| Pc_TC137117 | -0.01 | 1     |      | 0.73  | 0.52      |      | -4.58 | 0.03 | Down | -1.88 | 0.17 |      | Expressed protein                                                       |
| Pc_TC137118 | 0.73  | 0.5   |      | 1.2   | 0.27      |      | 2.11  | 0.1  |      | 2.12  | 0.03 | Up   | Expressed protein                                                       |
| Pc_TC137125 | 0.38  | 0.42  |      | 0.93  | 0.1       |      | -2.66 | 0.01 | Down | -2.5  | 0    | Down | Expressed protein                                                       |
| Pc_TC137170 | 2.08  | 0.2   |      | 3.72  | 0         | Up   | -2.08 | 0.63 |      | -0.96 | 0.86 |      | Expressed protein                                                       |
| Pc_TC137172 | -0.85 | 0.32  |      | 1.01  | 0.22      |      | -4.89 | 0    | Down | -2.77 | 0.01 | Down | Lipophorin receptor                                                     |
| Pc_TC137201 | -2.59 | 0     | Down | -2.11 | 0.01      | Down | 2.45  | 0.02 | Up   | 1.55  | 0.02 | Up   | Expressed protein                                                       |
| Pc_TC137210 | 0.53  | 0.28  |      | 0.83  | 0.16      |      | -2.45 | 0.02 | Down | -1.89 | 0.01 | Down | Expressed protein                                                       |
| Pc_TC137223 | -0.27 | 0.81  |      | 0.11  | 0.95      |      | -1.72 | 0.23 |      | -3.18 | 0.01 | Down | Expressed protein                                                       |
| Pc_TC137224 | -1.32 | 0.16  |      | -1.15 | 0.27      |      | -2.25 | 0.11 |      | -4    | 0    | Down | Expressed protein                                                       |
| Pc_TC137238 | -0.12 | 0.89  |      | 0.96  | 0.19      |      | -2.19 | 0.08 |      | -2    | 0.03 | Down | Uncharacterized protein                                                 |
| Pc_TC137245 | -0.1  | 0.92  |      | -0.23 | 0.8       |      | -2.84 | 0.03 | Down | -1.72 | 0.06 |      | Expressed protein                                                       |
| Pc_TC137256 | -3.17 | 0.04  | Down | -1.87 | 0.19      |      | 0.11  | 0.97 |      | -1.45 | 0.25 |      | Expressed protein                                                       |
| Pc_TC137277 | -3.14 | 0.01  | Down | 0.3   | 0.79      |      | -0.17 | 0.92 |      | -0.23 | 0.85 |      | Expressed protein                                                       |
| Pc_TC137301 | 3.17  | 0.04  | Up   | 0     | 0.67      |      | 1.96  | 0.42 |      | 0     | 0.54 |      | sorting nexin 1                                                         |
| Pc_TC137306 | 3.08  | 0.05  | Up   | 1.38  | 0.65      |      | 2.09  | 0.38 |      | 2.63  | 0.14 |      | Expressed protein                                                       |
| Pc_TC137307 | 0.76  | 0.31  |      | 1.13  | 0.17      |      | -2.5  | 0.08 |      | -2.11 | 0.04 | Down | Expressed protein                                                       |
| Pc_TC137344 | -3.09 | 0.04  | Down | -0.65 | 0.64      |      | 0.09  | 0.99 |      | -0.15 | 0.94 |      | Expressed protein                                                       |
| Pc_TC137360 | -0.22 | 0.91  |      | 0.38  | 0.78      |      | -0.8  | 0.63 |      | -4.37 | 0.02 | Down | Expressed protein                                                       |
| Pc_TC137370 | 0.03  | 1     |      | 1.57  | 0.03      | Up   | -1.28 | 0.3  |      | -1.11 | 0.22 |      | GTP binding Elongation factor Tu family protein                         |
| Pc_TC137384 | -1.63 | 0     | Down | -0.57 | 0.3       |      | 0.48  | 0.6  |      | -0.18 | 0.76 |      | FKBP-like peptidyl-prolyl cis-trans isomerase family protein            |

|             |       |       |      |       |           |      |       |           |      |       |       |      |                                                               |      |
|-------------|-------|-------|------|-------|-----------|------|-------|-----------|------|-------|-------|------|---------------------------------------------------------------|------|
| Pc_TC137422 | 0.11  | 0.91  |      | 0.73  | 0.38      |      | -5.05 | 0         | Down | -2.47 | 0.02  | Down | Expressed protein                                             |      |
| Pc_TC137430 | 2.69  | 0     | Up   | 0     | 0.01      |      | 1.96  | 0.12      |      | -1.09 | 0.39  |      | Expressed protein                                             |      |
| Pc_TC137432 | 2.08  | 0.01  | Up   | 0     | 0         |      | 1.52  | 0.22      |      | 1.58  | 0.08  |      | Expressed protein                                             |      |
| Pc_TC137437 | 2.82  | 0.04  | Up   | 0     | 0.48      |      | 2.24  | 0.24      |      | -0.37 | 1     |      | Expressed protein                                             |      |
| Pc_TC137467 | 0.78  | 0.24  |      | 1.26  | 0.09      |      | -5.43 | 0         | Down | -3.14 | 0     | Down | Expressed protein                                             |      |
| Pc_TC137547 | 0.59  | 0.45  |      | 0.93  | 0.28      |      | -0.98 | 0.46      |      | -2.18 | 0.05  | Down | embryo defective 2410                                         |      |
| Pc_TC137548 | -1.88 | 0.02  | Down | -1.37 | 0.12      |      | -0.74 | 0.53      |      | -0.72 | 0.39  |      | embryo defective 2410                                         |      |
| Pc_TC137549 | -2.65 | 0     | Down | -1.24 | 0.14      |      | -0.15 | 0.9       |      | -1.44 | 0.08  |      | embryo defective 2410                                         |      |
| Pc_TC137550 | 1.57  | 0.04  | Up   | 2.8   | 0         | Up   | 1.3   | 0.28      |      | 0.98  | 0.28  |      | embryo defective 2410                                         |      |
| Pc_TC137553 | -0.08 | 0.97  |      | 0.71  | 0.46      |      | -2.72 | 0.08      |      | -3.18 | 0.01  | Down | Expressed protein                                             |      |
| Pc_TC137557 | -4.39 | ##### | Down | -6.98 | 4.15E-023 | Down | -4.61 | 9.78E-006 | Down | -5.21 | ##### | Down | actin-11                                                      |      |
| Pc_TC137559 | 0.04  | 1     |      | 0.77  | 0.37      |      | -0.97 | 0.45      |      | -2.34 | 0.03  | Down | Expressed protein                                             |      |
| Pc_TC137576 | 0.4   | 0.68  |      | 1.8   | 0.04      | Up   | -0.17 | 0.92      |      | -0.2  | 0.88  |      | Expressed protein                                             |      |
| Pc_TC137582 | 1.02  | 0.16  |      | 1.67  | 0.04      | Up   | -3.71 | 0.02      | Down | -1.41 | 0.16  |      | Uncharacterized protein                                       |      |
| Pc_TC137585 | -0.51 | 0.89  |      | -1.53 | 0.58      |      | 3.17  | 0.03      | Up   | 0.95  | 0.55  |      | Expressed protein                                             |      |
| Pc_TC137613 | -1.42 | 0.14  |      | 0.02  | 1         |      | -1.26 | 0.35      |      | -5.46 | 0     | Down | Expressed protein                                             |      |
| Pc_TC137617 | -0.41 | 0.69  |      | 1.55  | 0.07      |      | 3.18  | 0.01      | Up   | 2.22  | 0.01  | Up   | Expressed protein                                             |      |
| Pc_TC137619 | -3.73 | 0.01  | Down | -1.75 | 0.15      |      | 0.67  | 0.6       |      | -0.37 | 0.74  |      | Expressed protein                                             |      |
| Pc_TC137631 | -3.17 | 0.04  | Down | -1.6  | 0.25      |      | -1.04 | 0.5       |      | -0.92 | 0.46  |      | Expressed protein                                             |      |
| Pc_TC137656 | 0.25  | 0.76  |      | 0.34  | 0.71      |      | 3.23  | 0         | Up   | 1.16  | 0.14  |      | Expressed protein                                             |      |
| Pc_TC137659 | 1.97  | 0.01  | Up   | 0.37  | 0.76      |      | -0.13 | 0.96      |      | 2.41  | 0     | Up   | Expressed protein                                             |      |
| Pc_TC137664 | -1.69 | 0.21  |      | -1.03 | 0.46      |      | -4.58 | 0.03      | Down | -2.14 | 0.13  |      | Expressed protein                                             |      |
| Pc_TC137667 | 0.08  | 1     |      | 1.93  | 0.04      | Up   | 0     | 0.01      |      | 0     | 0     |      | Expressed protein                                             |      |
| Pc_TC137674 | 0.42  | 0.32  |      | 0.45  | 0.4       |      | -0.76 | 0.43      |      | 1.23  | 0.03  | Up   | pleiotropic drug resistance 6                                 |      |
| Pc_TC137675 | 0.12  | 0.74  |      | -0.95 | 0.06      |      | 0.75  | 0.39      |      | 1.91  | 0     | Up   | pleiotropic drug resistance 6                                 |      |
| Pc_TC137677 | -0.9  | 0.21  |      | 1.08  | 0.13      |      | -1.38 | 0.24      |      | -2.19 | 0.01  | Down | photosystem II light harvesting complex gene 2.2              |      |
| Pc_TC137679 | 0     | 0     |      | -3.7  | 0.01      | Down | 0     | 0         |      | 0     | 0     |      | Heat shock protein 70 (Hsp 70) family protein                 |      |
| Pc_TC137694 | -3.73 | 0.05  | Down | -2.75 | 0.13      |      | -0.22 | 0.93      |      | -1.6  | 0.27  |      | Expressed protein                                             |      |
| Pc_TC137706 | 0.46  | 0.6   |      | 0.4   | 0.69      |      | -4.4  | 0.01      | Down | -2.7  | 0.03  | Down | Expressed protein                                             |      |
| Pc_TC137716 | 1.06  | 0.16  |      | 0.8   | 0.38      |      | -5.54 | 0         | Down | 0.25  | 0.81  |      | Expressed protein                                             |      |
| Pc_TC137722 | 1.82  | 0.29  |      | 3.47  | 0.01      | Up   | 0     | 0.36      |      | 0     | 0.35  |      | Expressed protein                                             |      |
| Pc_TC137746 | -3.38 | 0     | Down | 0.28  | 0.75      |      | -2.96 | 0.03      | Down | -2.83 | 0.01  | Down | Expressed protein                                             |      |
| Pc_TC137754 | 1.47  | 0.03  | Up   | 0     | 0         |      | -0.04 | 0.99      |      | -0.92 | 0.35  |      | RNA-binding KH domain-containing protein                      |      |
| Pc_TC137767 | 0.84  | 0.22  |      | 0.92  | 0.24      |      | -3.69 | 0.01      | Down | -1.91 | 0.04  | Down | Putative uncharacterized protein                              |      |
| Pc_TC137795 | -0.17 | 0.79  |      | -0.32 | 0.67      |      | -2.72 | 0.02      | Down | -1.86 | 0.02  | Down | Expressed protein                                             |      |
| Pc_TC137807 | -0.34 | 0.71  |      | -0.41 | 0.69      |      | 1.8   | 0.11      |      | 1.77  | 0.02  | Up   | Expressed protein                                             |      |
| Pc_TC137830 | 1.3   | 0.06  |      | 2.08  | 0.01      | Up   | -0.09 | 0.96      |      | 1.63  | 0.04  | Up   | Expressed protein                                             |      |
| Pc_TC137832 | 0.55  | 0.49  |      | 1.68  | 0.04      | Up   | -1.14 | 0.39      |      | -0.96 | 0.34  |      | Expressed protein                                             |      |
| Pc_TC137840 | 1.82  | 0.14  |      | 2.17  | 0.09      |      | 0.92  | 0.64      |      | 2.9   | 0.01  | Up   | putative Ty1-copia subclass                                   |      |
| Pc_TC137851 | -2.31 | 0     | Down | -1.54 | 0.06      |      | -1.73 | 0.14      |      | 0.4   | 0.59  |      | Expressed protein                                             |      |
| Pc_TC137856 | -0.55 | 0.54  |      | -0.57 | 0.58      |      | -1.8  | 0.19      |      | -2.41 | 0.03  | Down | Expressed protein                                             |      |
| Pc_TC137857 | -0.92 | 0.19  |      | -1.48 | 0.08      |      | 2.24  | 0.03      | Up   | 1.24  | 0.08  |      | Expressed protein                                             |      |
| Pc_TC137863 | -0.37 | 0.81  |      | 0.32  | 0.83      |      | 2.74  | 0.03      | Up   | 1.95  | 0.04  | Up   | Expressed protein                                             |      |
| Pc_TC137874 | 1.08  | 0.47  |      | 2.6   | 0.03      | Up   | 0     | 0.14      |      | 0     | 0.11  |      | Expressed protein                                             |      |
| Pc_TC137886 | -2.12 | 0.08  |      | -2.88 | 0.05      | Down | 0.71  | 0.59      |      | -1.2  | 0.3   |      | Expressed protein                                             |      |
| Pc_TC137891 | -2.28 | 0.02  | Down | -2.49 | 0.03      | Down | 1.34  | 0.24      |      | 0     | 1     |      | Uncharacterized protein                                       |      |
| Pc_TC137896 | -0.59 | 0.57  |      | 0.73  | 0.45      |      | -2.93 | 0.07      |      | -3.54 | 0.01  | Down | Expressed protein                                             |      |
| Pc_TC137905 | 1.08  | 0.33  |      | 2.18  | 0.03      | Up   | -0.15 | 0.98      |      | 0.07  | 1     |      | Expressed protein                                             |      |
| Pc_TC137913 | 0.3   | 0.77  |      | 0.38  | 0.73      |      | 1.65  | 0.17      |      | 1.87  | 0.03  | Up   | Uncharacterized protein                                       |      |
| Pc_TC137926 | 1.5   | 0.03  | Up   | 0     | 0         |      | 1.21  | 0.29      |      | -0.64 | 0.5   |      | cold shock domain protein 1                                   | CCHC |
| Pc_TC137930 | -0.34 | 0.8   |      | -0.46 | 0.74      |      | -3.82 | 0.04      | Down | -2.7  | 0.05  |      | Expressed protein                                             |      |
| Pc_TC137939 | -1.34 | 0.32  |      | 1.19  | 0.26      |      | -4.5  | 0.04      | Down | 0     | 0.01  |      | Expressed protein                                             |      |
| Pc_TC137948 | -1.13 | 0.22  |      | 1.69  | 0.03      | Up   | -0.85 | 0.52      |      | -2.58 | 0.02  | Down | Ribosomal L5P family protein                                  |      |
| Pc_TC138009 | 0.42  | 0.24  |      | 0.56  | 0.22      |      | -3.3  | 0         | Down | -2.42 | ##### | Down | Expressed protein                                             |      |
| Pc_TC138016 | 1.87  | 0     | Up   | 0     | 3.60E-008 |      | 2.02  | 0.05      | Up   | 0.49  | 0.5   |      | UniRef100                                                     |      |
| Pc_TC138043 | 2.25  | ##### | Up   | 0     | 3.25E-007 |      | 1.81  | 0.08      |      | 0.13  | 0.87  |      | S-adenosylmethionine synthetase 2                             |      |
| Pc_TC138044 | -0.44 | 0.72  |      | -0.36 | 0.8       |      | 0     | 0.01      |      | -3.7  | 0.02  | Down | Expressed protein                                             |      |
| Pc_TC138064 | 2.43  | 0     | Up   | 0     | 0         |      | 1.28  | 0.28      |      | -0.11 | 0.94  |      | Uncharacterized protein                                       |      |
| Pc_TC138085 | -2.14 | 0.06  |      | -3.75 | 0.01      | Down | -1.6  | 0.26      |      | -3.6  | 0.01  | Down | Ribosomal protein S5/Elongation factor G/III/V family protein |      |
| Pc_TC138088 | 1.15  | 0.11  |      | -0.53 | 0.6       |      | 0.85  | 0.47      |      | 1.57  | 0.05  | Up   | Expressed protein                                             |      |
| Pc_TC138098 | 2.75  | 0     | Up   | 0     | 0.02      |      | 1.8   | 0.17      |      | 0.86  | 0.44  |      | Expressed protein                                             |      |
| Pc_TC138112 | 1.94  | 0     | Up   | 0     | 0         |      | 0.52  | 0.67      |      | 0.53  | 0.54  |      | OSJNBb0085C12.5 protein                                       |      |

|             |       |       |      |       |           |      |       |           |      |       |       |      |                                                                      |         |
|-------------|-------|-------|------|-------|-----------|------|-------|-----------|------|-------|-------|------|----------------------------------------------------------------------|---------|
| Pc_TC138114 | -0.07 | 0.92  |      | 1.17  | 0.08      |      | -2.26 | 0.05      |      | -1.59 | 0.05  | Down | Expressed protein                                                    |         |
| Pc_TC138138 | 0.08  | 1     |      | -1.94 | 0.4       |      | 4.14  | 0         | Up   | 1.71  | 0.15  |      | Expressed protein                                                    |         |
| Pc_TC138162 | -2.86 | 0.03  | Down | -1.66 | 0.2       |      | -0.07 | 0.99      |      | -0.58 | 0.62  |      | Expressed protein                                                    |         |
| Pc_TC138167 | -0.44 | 0.64  |      | 0.3   | 0.77      |      | -1.22 | 0.37      |      | -3.42 | 0.01  | Down | Putative uncharacterized protein OSJNBa0016D04.9                     |         |
| Pc_TC138195 | -4.01 | 0.02  | Down | -2.44 | 0.12      |      | -1.78 | 0.28      |      | -1    | 0.44  |      | Expressed protein                                                    |         |
| Pc_TC138201 | 1.08  | 0.4   |      | 0.38  | 0.87      |      | 2.73  | 0.05      | Up   | 1.27  | 0.32  |      | Expressed protein                                                    |         |
| Pc_TC138202 | 0.17  | 0.88  |      | 1.58  | 0.06      |      | -3.5  | 0.03      | Down | -2.37 | 0.04  | Down | Expressed protein                                                    |         |
| Pc_TC138204 | -1.24 | 0.47  |      | 3.21  | 0         | Up   | 0     | 0.05      |      | -3.7  | 0.08  |      | cinnamyl alcohol dehydrogenase 9                                     |         |
| Pc_TC138210 | 2     | 0.01  | Up   | 0     | 0.01      |      | 2.05  | 0.1       |      | 0.78  | 0.46  |      | triosephosphate isomerase                                            |         |
| Pc_TC138220 | -2.41 | 0.01  | Down | -1.35 | 0.18      |      | 0.91  | 0.43      |      | 0.61  | 0.47  |      | Expressed protein                                                    |         |
| Pc_TC138229 | -3.2  | ##### | Down | -0.76 | 0.2       |      | -0.52 | 0.59      |      | -0.16 | 0.79  |      | basic pentacysteine 2                                                | BBR/BPC |
| Pc_TC138258 | 2.08  | 0.06  |      | 2.5   | 0.03      | Up   | 1.55  | 0.33      |      | 2.63  | 0.02  | Up   | Thioredoxin superfamily protein                                      |         |
| Pc_TC138259 | 1.34  | 0.37  |      | 1.2   | 0.49      |      | 1.5   | 0.4       |      | 2.98  | 0.01  | Up   | Thioredoxin superfamily protein                                      |         |
| Pc_TC138261 | -1.97 | 0.02  | Down | -0.77 | 0.38      |      | 0.47  | 0.68      |      | -1.12 | 0.2   |      | Thioredoxin superfamily protein                                      |         |
| Pc_TC138275 | -1.18 | 0.16  |      | -3.2  | 0.01      | Down | 2.38  | 0.03      | Up   | 1.12  | 0.16  |      | Inositol monophosphatase family protein                              |         |
| Pc_TC138281 | -0.39 | 0.66  |      | 1.15  | 0.16      |      | -3.23 | 0.03      | Down | -1.61 | 0.11  |      | Expressed protein                                                    |         |
| Pc_TC138288 | 0.64  | 0.41  |      | 1.78  | 0.02      | Up   | -1.34 | 0.32      |      | 0.01  | 1     |      | Expressed protein                                                    |         |
| Pc_TC138296 | 2.05  | 0.02  | Up   | 0.8   | 0.53      |      | 0.38  | 0.84      |      | -0.26 | 0.9   |      | Expressed protein                                                    |         |
| Pc_TC138308 | 0.19  | 0.87  |      | -3.53 | 0.02      | Down | 1.03  | 0.42      |      | -0.01 | 1     |      | Expressed protein                                                    |         |
| Pc_TC138325 | 1.15  | 0.13  |      | 1.68  | 0.05      | Up   | -2.77 | 0.07      |      | -1.43 | 0.19  |      | alpha/beta-Hydrolases superfamily protein                            |         |
| Pc_TC138384 | 0.42  | 0.35  |      | 0.81  | 0.14      |      | -2.09 | 0.04      | Down | -1.86 | 0.01  | Down | Expressed protein                                                    |         |
| Pc_TC138386 | 0.08  | 1     |      | -3.94 | 0.05      | Down | 1     | 0.47      |      | 0.71  | 0.52  |      | Expressed protein                                                    |         |
| Pc_TC138390 | 0.5   | 0.52  |      | 1.68  | 0.03      | Up   | -1.66 | 0.22      |      | -2.45 | 0.03  | Down | Expressed protein                                                    |         |
| Pc_TC138414 | -2.3  | 0     | Down | -0.66 | 0.36      |      | -0.84 | 0.43      |      | -1.6  | 0.04  | Down | Uncharacterized protein                                              |         |
| Pc_TC138416 | -1.86 | 0     | Down | -0.26 | 0.68      |      | -0.9  | 0.38      |      | -0.91 | 0.18  |      | Uncharacterized protein                                              |         |
| Pc_TC138431 | 2.66  | 0     | Up   | 0     | 0.02      |      | 1.93  | 0.13      |      | 0.58  | 0.62  |      | Expressed protein                                                    |         |
| Pc_TC138432 | 0.7   | 0.19  |      | 0.78  | 0.22      |      | -3.89 | 0         | Down | -2.25 | 0     | Down | Expressed protein                                                    |         |
| Pc_TC138434 | -3.83 | 0.04  | Down | -2.26 | 0.17      |      | -1.4  | 0.41      |      | -0.11 | 0.98  |      | Expressed protein                                                    |         |
| Pc_TC138468 | 0.49  | 0.6   |      | 1     | 0.3       |      | -4.08 | 0.03      | Down | -2.37 | 0.06  |      | Expressed protein                                                    |         |
| Pc_TC138469 | 1.04  | 0.16  |      | 2.01  | 0.01      | Up   | -3.04 | 0.04      | Down | -1.7  | 0.11  |      | Expressed protein                                                    |         |
| Pc_TC138486 | -1.17 | 0.02  | Down | -1.12 | 0.07      |      | 0.27  | 0.78      |      | -0.87 | 0.18  |      | Expressed protein                                                    |         |
| Pc_TC138488 | 0.3   | 0.81  |      | 1.87  | 0.05      | Up   | -3.67 | 0.06      |      | -2.54 | 0.08  |      | Expressed protein                                                    |         |
| Pc_TC138489 | 0     | 0.01  |      | 0     | 0.02      |      | 0     | 0.01      |      | -3.37 | 0.04  | Down | profilin 3                                                           |         |
| Pc_TC138506 | -1.81 | 0.06  |      | -3.15 | 0.01      | Down | 2.19  | 0.05      |      | 1.24  | 0.13  |      | Expressed protein                                                    |         |
| Pc_TC138518 | 0.13  | 0.88  |      | 0.11  | 0.92      |      | -3.25 | 0.02      | Down | -0.4  | 0.65  |      | Expressed protein                                                    |         |
| Pc_TC138525 | -0.11 | 0.96  |      | 0.72  | 0.47      |      | 0     | 0         |      | -2.96 | 0.03  | Down | Expressed protein                                                    |         |
| Pc_TC138537 | 0.28  | 0.76  |      | 0.59  | 0.53      |      | -3    | 0.05      | Down | -0.18 | 0.88  |      | Expressed protein                                                    |         |
| Pc_TC138562 | 0.3   | 0.81  |      | 0.84  | 0.43      |      | 3.09  | 0.01      | Up   | 1.7   | 0.07  |      | Expressed protein                                                    |         |
| Pc_TC138564 | -3.09 | 0.04  | Down | -2.11 | 0.16      |      | -1.34 | 0.4       |      | -0.74 | 0.56  |      | Expressed protein                                                    |         |
| Pc_TC138576 | -0.04 | 1     |      | 1.58  | 0.05      | Up   | 0.19  | 0.9       |      | 0.21  | 0.84  |      | NADH dehydrogenase 5B                                                |         |
| Pc_TC138589 | 2.02  | 0.03  | Up   | 0     | 0.04      |      | 0.73  | 0.65      |      | -0.79 | 0.61  |      | Proteasome component (PCI) domain protein                            |         |
| Pc_TC138606 | 2.73  | 0     | Up   | 0     | 0         |      | 2.42  | 0.04      | Up   | 1.43  | 0.12  |      | Expressed protein                                                    |         |
| Pc_TC138608 | 5.67  | ##### | Up   | 0     | 0.36      |      | 1.67  | 0.38      |      | 0     | 0.24  |      | Expressed protein                                                    |         |
| Pc_TC138610 | 3.08  | 0.05  | Up   | 0     | 0.67      |      | 2.83  | 0.16      |      | 2.71  | 0.12  |      | Expressed protein                                                    |         |
| Pc_TC138615 | -0.31 | 0.81  |      | 0.95  | 0.34      |      | -3.89 | 0.04      | Down | -3.18 | 0.03  | Down | uncharacterized protein                                              |         |
| Pc_TC138617 | 1.99  | 0.02  | Up   | 1.97  | 0.05      |      | -0.11 | 0.99      |      | 2.6   | 0.01  | Up   | Putative RIRE1 poly protein                                          |         |
| Pc_TC138626 | 0.46  | 0.33  |      | 0.18  | 0.76      |      | 0     | 1.30E-008 |      | -4.59 | ##### | Down | Expressed protein                                                    |         |
| Pc_TC138627 | 0.49  | 0.2   |      | 0.39  | 0.42      |      | -7.82 | 2.02E-009 | Down | -3.48 | ##### | Down | Expressed protein                                                    |         |
| Pc_TC138632 | 1.28  | 0.24  |      | 2.32  | 0.03      | Up   | -2.82 | 0.2       |      | -3.7  | 0.08  |      | Uncharacterized protein                                              |         |
| Pc_TC138642 | -4.09 | 0.02  | Down | -2.53 | 0.11      |      | -0.27 | 0.88      |      | -1.09 | 0.39  |      | Expressed protein                                                    |         |
| Pc_TC138646 | 0.04  | 0.9   |      | 0.43  | 0.25      |      | -2.28 | 0.01      | Down | -1.52 | 0     | Down | Expressed protein                                                    |         |
| Pc_TC138652 | -1    | 0.26  |      | 1.68  | 0.03      | Up   | 0     | 0         |      | -4.7  | 0     | Down | Expressed protein                                                    |         |
| Pc_TC138661 | 0.23  | 0.83  |      | 2.17  | 0.01      | Up   | 0     | 1         |      | -1.13 | 0.3   |      | ribosomal protein L5                                                 |         |
| Pc_TC138665 | -1.19 | 0.18  |      | -2.71 | 0.02      | Down | 0.1   | 0.95      |      | -0.6  | 0.53  |      | Expressed protein                                                    |         |
| Pc_TC138669 | 0     | 0     |      | 0     | 0         |      | -4.08 | 0.03      | Down | -3.96 | 0.01  | Down | eukaryotic initiation factor 4A-III                                  |         |
| Pc_TC138678 | 0.95  | 0.26  |      | 0.7   | 0.49      |      | 2.07  | 0.08      |      | 2.11  | 0.01  | Up   | Expressed protein                                                    |         |
| Pc_TC138691 | -0.2  | 0.7   |      | -0.46 | 0.46      |      | 2.04  | 0.03      | Up   | 0.53  | 0.39  |      | Uncharacterized protein                                              |         |
| Pc_TC138693 | -2.81 | 0.01  | Down | -0.02 | 1         |      | 0.83  | 0.49      |      | -0.54 | 0.58  |      | Expressed protein                                                    |         |
| Pc_TC138712 | 2.4   | 0.04  | Up   | 2.78  | 0.02      | Up   | 1.7   | 0.32      |      | 0.89  | 0.63  |      | Expressed protein                                                    |         |
| Pc_TC138761 | 0.48  | 0.63  |      | -0.7  | 0.58      |      | 2.81  | 0.02      | Up   | 1.49  | 0.1   |      | Expressed protein                                                    |         |
| Pc_TC138769 | 0     | ##### |      | -6.11 | 6.63E-008 | Down | -0.95 | 0.38      |      | -3.22 | 0     | Down | Expressed protein                                                    |         |
| Pc_TC138805 | 0.14  | 0.81  |      | 0.3   | 0.66      |      | -2.15 | 0.06      |      | -2    | 0.01  | Down | Putative SWI/SNF-related matrix-associated actin-dependent regulator |         |

|             |       |      |      |       |           |      |       |           |      |       |       |      |                                                                            |
|-------------|-------|------|------|-------|-----------|------|-------|-----------|------|-------|-------|------|----------------------------------------------------------------------------|
| Pc_TC138808 | 0.53  | 0.08 |      | 0.57  | 0.14      |      | -4.38 | 4.17E-006 | Down | -2.45 | ##### | Down | Expressed protein                                                          |
| Pc_TC138833 | 1.12  | 0.03 | Up   | 0     | 1.28E-010 |      | 1.03  | 0.3       |      | 0.39  | 0.56  |      | Expressed protein                                                          |
| Pc_TC138847 | 0.49  | 0.64 |      | 0.84  | 0.43      |      | -4.67 | 0.03      | Down | -2.96 | 0.05  | Down | Expressed protein                                                          |
| Pc_TC138887 | 3.47  | 0.02 | Up   | 0     | 0.67      |      | 2.67  | 0.2       |      | 1.43  | 0.58  |      | Expressed protein                                                          |
| Pc_TC138907 | 2.4   | 0.01 | Up   | 0     | 0.05      |      | 1.85  | 0.18      |      | -0.66 | 0.69  |      | Expressed protein                                                          |
| Pc_TC138918 | 0.69  | 0.49 |      | 0.78  | 0.48      |      | 2.88  | 0.02      | Up   | 2.52  | 0     | Up   | ABC2 homolog 6                                                             |
| Pc_TC138919 | 0.12  | 0.86 |      | -2.17 | 0.01      | Down | 0.62  | 0.56      |      | 0.01  | 1     |      | ABC2 homolog 6                                                             |
| Pc_TC138935 | -1.09 | 0.29 |      | -0.3  | 0.81      |      | -3.25 | 0.05      | Down | -1.22 | 0.27  |      | Putative uncharacterized protein                                           |
| Pc_TC138941 | 0.56  | 0.69 |      | 2.49  | 0.02      | Up   | 0     | 0.05      |      | -1.11 | 0.51  |      | Expressed protein                                                          |
| Pc_TC138943 | -0.04 | 1    |      | 0.88  | 0.46      |      | 2.92  | 0.02      | Up   | 1.21  | 0.26  |      | Expressed protein                                                          |
| Pc_TC138945 | 0.38  | 0.67 |      | 0.01  | 1         |      | -2.23 | 0.13      |      | -2.7  | 0.03  | Down | RNA-directed DNA polymerase (reverse transcriptase)-related family protein |
| Pc_TC138981 | 0.45  | 0.42 |      | 1.32  | 0.04      | Up   | -2.44 | 0.03      | Down | -1.11 | 0.14  |      | Expressed protein                                                          |
| Pc_TC138988 | -0.57 | 0.61 |      | 1.12  | 0.24      |      | -1.5  | 0.32      |      | -2.83 | 0.04  | Down | Uncharacterized protein                                                    |
| Pc_TC139016 | 0.51  | 0.33 |      | 0.56  | 0.38      |      | -3.7  | 0         | Down | -1.75 | 0.02  | Down | autoinhibited Ca(2+)-ATPase 10                                             |
| Pc_TC139024 | 0.43  | 0.49 |      | 0.89  | 0.21      |      | -2.08 | 0.08      |      | -1.87 | 0.03  | Down | Uncharacterized protein                                                    |
| Pc_TC139025 | 0.08  | 0.88 |      | 0.81  | 0.17      |      | -2.45 | 0.03      | Down | -1.33 | 0.06  |      | Expressed protein                                                          |
| Pc_TC139039 | 0.05  | 0.95 |      | 0.1   | 0.91      |      | -1.54 | 0.18      |      | -1.58 | 0.05  | Down | Expressed protein                                                          |
| Pc_TC139054 | -1.92 | 0.05 | Down | -1.18 | 0.25      |      | 1.33  | 0.25      |      | 0.08  | 0.95  |      | Expressed protein                                                          |
| Pc_TC139062 | -1.14 | 0.42 |      | -0.29 | 0.89      |      | -0.3  | 0.89      |      | -4.18 | 0.03  | Down | Expressed protein                                                          |
| Pc_TC139069 | -1.71 | 0.06 |      | -1.43 | 0.15      |      | -3.18 | 0.03      | Down | -2.06 | 0.04  | Down | Expressed protein                                                          |
| Pc_TC139070 | 0.66  | 0.53 |      | 1.92  | 0.04      | Up   | 2.09  | 0.1       |      | 1.21  | 0.23  |      | Expressed protein                                                          |
| Pc_TC139072 | 0.12  | 0.84 |      | -1.71 | 0.02      | Down | 0.38  | 0.71      |      | -0.23 | 0.74  |      | Expressed protein                                                          |
| Pc_TC139076 | 0.19  | 0.84 |      | -0.53 | 0.6       |      | -2.97 | 0.04      | Down | -1.85 | 0.07  |      | Expressed protein                                                          |
| Pc_TC139079 | 2.71  | 0    | Up   | 0     | 0.02      |      | -0.08 | 1         |      | 0.53  | 0.67  |      | kow domain-containing transcription factor 1                               |
| Pc_TC139087 | 0.11  | 0.88 |      | 0.47  | 0.52      |      | -1.94 | 0.1       |      | -1.82 | 0.03  | Down | Expressed protein                                                          |
| Pc_TC139093 | 1.34  | 0.06 |      | 1.78  | 0.02      | Up   | -1.5  | 0.26      |      | 0.11  | 0.93  |      | Expressed protein                                                          |
| Pc_TC139123 | -0.88 | 0.34 |      | -0.37 | 0.73      |      | -3.04 | 0.04      | Down | -2.5  | 0.03  | Down | Expressed protein                                                          |
| Pc_TC139148 | -0.01 | 0.99 |      | 0.83  | 0.14      |      | -4.24 | 0         | Down | -3.9  | ##### | Down | Expressed protein                                                          |
| Pc_TC139149 | 1.94  | 0.01 | Up   | 0     | 0         |      | 1.55  | 0.21      |      | 0.41  | 0.71  |      | 2 iron,2 sulfur cluster binding                                            |
| Pc_TC139152 | -0.26 | 0.83 |      | 0.8   | 0.42      |      | -4.08 | 0.03      | Down | -1.64 | 0.17  |      | Uncharacterized protein                                                    |
| Pc_TC139158 | -0.11 | 0.94 |      | -3.94 | 0.01      | Down | 0.75  | 0.54      |      | 0.27  | 0.79  |      | Expressed protein                                                          |
| Pc_TC139205 | 0.38  | 0.69 |      | 0.53  | 0.61      |      | 0     | 0         |      | -4.08 | 0.01  | Down | Expressed protein                                                          |
| Pc_TC139213 | -0.16 | 0.91 |      | 0.22  | 0.86      |      | -2.2  | 0.15      |      | -2.75 | 0.03  | Down | Expressed protein                                                          |
| Pc_TC139223 | -2.57 | 0.04 | Down | -1    | 0.4       |      | 2.19  | 0.06      |      | 0.63  | 0.52  |      | Expressed protein                                                          |
| Pc_TC139244 | 0.66  | 0.45 |      | 0.38  | 0.73      |      | -4.08 | 0.03      | Down | -1.96 | 0.11  |      | Expressed protein                                                          |
| Pc_TC139267 | 0.08  | 0.98 |      | -0.72 | 0.55      |      | 2.47  | 0.04      | Up   | 1.27  | 0.16  |      | Expressed protein                                                          |
| Pc_TC139269 | -0.02 | 0.99 |      | 0.54  | 0.42      |      | -2.49 | 0.03      | Down | -1.87 | 0.02  | Down | Expressed protein                                                          |
| Pc_TC139275 | 0.23  | 0.87 |      | -0.65 | 0.64      |      | -4.67 | 0.03      | Down | -1.09 | 0.39  |      | Expressed protein                                                          |
| Pc_TC139347 | 1.15  | 0.31 |      | 2.2   | 0.04      | Up   | 0.77  | 0.64      |      | 0.76  | 0.56  |      | Expressed protein                                                          |
| Pc_TC139360 | 0.89  | 0.37 |      | 1.58  | 0.11      |      | -0.8  | 0.63      |      | -3.37 | 0.04  | Down | Expressed protein                                                          |
| Pc_TC139367 | -3.58 | 0    | Down | -1.73 | 0.11      |      | -2.29 | 0.1       |      | -3.62 | 0     | Down | Expressed protein                                                          |
| Pc_TC139382 | 0.63  | 0.33 |      | 1.13  | 0.11      |      | -2.5  | 0.05      | Down | -0.54 | 0.51  |      | Expressed protein                                                          |
| Pc_TC139425 | -0.76 | 0.47 |      | 0     | 1         |      | -3.14 | 0.06      |      | -2.7  | 0.04  | Down | Expressed protein                                                          |
| Pc_TC139438 | -0.14 | 1    |      | 0.25  | 0.97      |      | 3.09  | 0.03      | Up   | 2.4   | 0.03  | Up   | Retrovirus-related Pol polyprotein LINE-1                                  |
| Pc_TC139448 | -1.11 | 0.4  |      | -3.94 | 0.05      | Down | -2.91 | 0.12      |      | -0.92 | 0.49  |      | putative unclassified                                                      |
| Pc_TC139450 | 1.77  | 0    | Up   | 0.91  | 0.18      |      | -0.4  | 0.71      |      | 2.09  | 0     | Up   | Expressed protein                                                          |
| Pc_TC139454 | 0.08  | 1    |      | 0.8   | 0.82      |      | 3.47  | 0.03      | Up   | 2.04  | 0.22  |      | Expressed protein                                                          |
| Pc_TC139455 | 2.99  | 0    | Up   | 0     | 0.11      |      | 2.09  | 0.15      |      | 0.63  | 0.69  |      | PDI-like 1-1                                                               |
| Pc_TC139458 | 0.08  | 1    |      | 2.38  | 0.03      | Up   | 1.03  | 0.54      |      | 0.21  | 0.97  |      | Zinc-binding ribosomal protein family protein                              |
| Pc_TC139459 | 0.63  | 0.27 |      | 1.32  | 0.04      | Up   | -1.37 | 0.22      |      | -1.06 | 0.16  |      | Expressed protein                                                          |
| Pc_TC139478 | -2.68 | 0.03 | Down | -4.7  | 0.01      | Down | -1.25 | 0.38      |      | -1.81 | 0.12  |      | Expressed protein                                                          |
| Pc_TC139489 | 1.19  | 0.4  |      | 2.87  | 0.01      | Up   | 0     | 0.14      |      | 0     | 0.11  |      | Expressed protein                                                          |
| Pc_TC139490 | 1.55  | 0    | Up   | 0     | 1.10E-008 |      | 1.42  | 0.17      |      | -0.43 | 0.56  |      | unknown protein                                                            |
| Pc_TC139491 | 1.94  | 0.01 | Up   | 0     | 0         |      | 1.54  | 0.21      |      | 0.07  | 0.99  |      | Cytochrome C1 family                                                       |
| Pc_TC139504 | 2.89  | 0.03 | Up   | 0     | 0.48      |      | 3.53  | 0.03      | Up   | 1.85  | 0.29  |      | Expressed protein                                                          |
| Pc_TC139505 | 0.08  | 1    |      | 0.06  | 1         |      | -3.4  | 0.09      |      | -4.28 | 0.02  | Down | Expressed protein                                                          |
| Pc_TC139508 | 3.17  | 0.04 | Up   | 0     | 0.67      |      | 2.59  | 0.22      |      | 2.43  | 0.19  |      | Expressed protein                                                          |
| Pc_TC139534 | 0.5   | 0.37 |      | 0.15  | 0.84      |      | -4.86 | 0         | Down | -2.42 | 0     | Down | UDP-D-glucose/UDP-D-galactose 4-epimerase 5                                |
| Pc_TC139550 | 0.98  | 0.14 |      | 1.5   | 0.05      | Up   | -3.9  | 0.01      | Down | -5.1  | ##### | Down | Expressed protein                                                          |
| Pc_TC139572 | -0.51 | 0.72 |      | -0.85 | 0.57      |      | 3.42  | 0         | Up   | 1.18  | 0.26  |      | Expressed protein                                                          |
| Pc_TC139578 | 0.47  | 0.25 |      | 0.05  | 0.93      |      | -2.14 | 0.03      | Down | -0.71 | 0.23  |      | Expressed protein                                                          |
| Pc_TC139580 | 0.56  | 0.62 |      | 0.24  | 0.89      |      | 2.65  | 0.03      | Up   | 1.36  | 0.18  |      | Expressed protein                                                          |

|             |       |       |      |       |           |      |       |           |      |       |       |      |                                                                                            |
|-------------|-------|-------|------|-------|-----------|------|-------|-----------|------|-------|-------|------|--------------------------------------------------------------------------------------------|
| Pc_TC139583 | -1.34 | 0.32  |      | -0.48 | 0.75      |      | -1.69 | 0.32      |      | -3.37 | 0.04  | Down | Expressed protein                                                                          |
| Pc_TC139585 | -2.2  | 0.04  | Down | -2.03 | 0.08      |      | 0.77  | 0.53      |      | -0.14 | 0.91  |      | Expressed protein                                                                          |
| Pc_TC139588 | -0.72 | 0.49  |      | -4.64 | 0.01      | Down | 0.87  | 0.49      |      | -0.03 | 1     |      | Expressed protein                                                                          |
| Pc_TC139598 | 2.16  | 0.03  | Up   | 1.47  | 0.23      |      | -2.08 | 0.34      |      | -1.96 | 0.29  |      | Expressed protein                                                                          |
| Pc_TC139603 | 1.15  | 0.31  |      | 2.32  | 0.03      | Up   | -0.01 | 1         |      | 1     | 0.42  |      | Expressed protein                                                                          |
| Pc_TC139607 | 1.86  | 0.03  | Up   | 0     | 0.02      |      | 2.52  | 0.05      | Up   | 0.57  | 0.64  |      | Expressed protein                                                                          |
| Pc_TC139608 | 1.66  | 0.1   |      | 2.44  | 0.02      | Up   | 0.09  | 1         |      | 1.43  | 0.21  |      | Ribosomal large subunit pseudouridine synthase B                                           |
| Pc_TC139645 | 0.4   | 0.39  |      | 0.79  | 0.16      |      | -4.26 | 0         | Down | -1.81 | 0.01  | Down | Expressed protein                                                                          |
| Pc_TC139661 | 2.04  | 0     | Up   | 1.83  | 0.01      | Up   | -2.02 | 0.12      |      | -1.4  | 0.14  |      | Expressed protein                                                                          |
| Pc_TC139747 | 0.33  | 0.64  |      | 0.62  | 0.42      |      | -3.15 | 0.02      | Down | -1.27 | 0.14  |      | Uncharacterized protein                                                                    |
| Pc_TC139753 | -1.06 | 0.27  |      | -2.4  | 0.05      | Down | 1.46  | 0.21      |      | -0.06 | 0.98  |      | Uncharacterized protein                                                                    |
| Pc_TC139767 | 1.08  | 0.37  |      | 2.31  | 0.03      | Up   | -2.67 | 0.25      |      | -0.54 | 0.78  |      | Expressed protein                                                                          |
| Pc_TC139810 | 0     | 1     |      | 2.06  | 0.59      |      | 4.9   | 0.01      | Up   | 3.43  | 0.1   |      | Expressed protein                                                                          |
| Pc_TC139821 | -1.82 | 0.05  |      | -1.39 | 0.18      |      | -0.1  | 0.95      |      | -3.15 | 0.01  | Down | Expressed protein                                                                          |
| Pc_TC139824 | 1.04  | 0.11  |      | 1.52  | 0.04      | Up   | -0.04 | 0.99      |      | 0.71  | 0.37  |      | cysteine-rich RLK (RECEPTOR-like protein kinase) 8                                         |
| Pc_TC139825 | 0.36  | 0.53  |      | -0.55 | 0.44      |      | -2.52 | 0.03      | Down | -0.99 | 0.18  |      | cysteine-rich RLK (RECEPTOR-like protein kinase) 8                                         |
| Pc_TC139828 | -1.24 | 0.25  |      | -0.26 | 0.84      |      | -2.33 | 0.13      |      | -3.02 | 0.02  | Down | Expressed protein                                                                          |
| Pc_TC139834 | 0.63  | 0.56  |      | 0.47  | 0.72      |      | -4.4  | 0.05      | Down | -1.7  | 0.23  |      | Expressed protein                                                                          |
| Pc_TC139844 | 0.81  | 0.07  |      | 1.55  | 0         | Up   | -4.65 | 0         | Down | -2.89 | ##### | Down | Expressed protein                                                                          |
| Pc_TC139875 | -0.32 | 0.62  |      | -2.28 | 0.01      | Down | -0.42 | 0.7       |      | -0.07 | 0.93  |      | Expressed protein                                                                          |
| Pc_TC139877 | 3.17  | 0.04  | Up   | 4.06  | 0         | Up   | 0     | 0.53      |      | 0.21  | 1     |      | Expressed protein                                                                          |
| Pc_TC139884 | 0     | 0.64  |      | 3.31  | 0.04      | Up   | -0.5  | 1         |      | 0     | 0.54  |      | Expressed protein                                                                          |
| Pc_TC139886 | 0.16  | 0.94  |      | -0.22 | 0.91      |      | 2.43  | 0.05      | Up   | 2.03  | 0.03  | Up   | Expressed protein                                                                          |
| Pc_TC139900 | 0.71  | 0.44  |      | 2.26  | 0.01      | Up   | -2.37 | 0.14      |      | -0.19 | 0.9   |      | methionine synthase 3                                                                      |
| Pc_TC139931 | 1.2   | 0.05  | Up   | 0.9   | 0.22      |      | -0.01 | 1         |      | 0.29  | 0.72  |      | Uncharacterized protein (Fragment)                                                         |
| Pc_TC139932 | -0.25 | 0.7   |      | 1.4   | 0.03      | Up   | 0.69  | 0.52      |      | 0.48  | 0.51  |      | Transcription factor jumoni (jnj) family protein / zinc finger (C5HC2 type) family protein |
| Pc_TC139951 | -2.86 | ##### | Down | -0.46 | 0.51      |      | -2.44 | 0.03      | Down | -2.35 | 0     | Down | Expressed protein                                                                          |
| Pc_TC139987 | 0.44  | 0.73  |      | 2.03  | 0.04      | Up   | -1.13 | 0.51      |      | -2.18 | 0.15  |      | Expressed protein                                                                          |
| Pc_TC140010 | 0.42  | 0.73  |      | -0.04 | 1         |      | 2.54  | 0.04      | Up   | 1.3   | 0.2   |      | Expressed protein                                                                          |
| Pc_TC140030 | -2.47 | 0.02  | Down | 0.81  | 0.36      |      | -0.77 | 0.56      |      | -1.04 | 0.3   |      | ribosomal protein L5                                                                       |
| Pc_TC140071 | 0.53  | 0.48  |      | 1.19  | 0.14      |      | -3.12 | 0.03      | Down | -0.48 | 0.61  |      | Expressed protein                                                                          |
| Pc_TC140086 | -0.57 | 0.61  |      | -4.4  | 0.01      | Down | -0.63 | 0.67      |      | 0.02  | 1     |      | Expressed protein                                                                          |
| Pc_TC140089 | 4.11  | ##### | Up   | 0     | 0.2       |      | 2.96  | 0.04      | Up   | 2.25  | 0.06  |      | Expressed protein                                                                          |
| Pc_TC140104 | 1.64  | 0     | Up   | 0     | 7.81E-007 |      | 1.54  | 0.15      |      | 0.59  | 0.43  |      | Amidase family protein                                                                     |
| Pc_TC140113 | 1.11  | 0.18  |      | 2.1   | 0.01      | Up   | -1.62 | 0.28      |      | 1.08  | 0.24  |      | Expressed protein                                                                          |
| Pc_TC140119 | -1.24 | 0.37  |      | -1.04 | 0.49      |      | -4.4  | 0.05      | Down | -0.96 | 0.48  |      | cytochrome P450 polypeptide 1                                                              |
| Pc_TC140129 | 0.82  | 0.63  |      | 2.47  | 0.04      | Up   | -2.08 | 0.43      |      | -0.37 | 0.93  |      | Methionine sulfoxide reductase (MSS4-like) family protein                                  |
| Pc_TC140162 | 2.65  | 0     | Up   | 0     | 0.01      |      | 2.51  | 0.04      | Up   | 1.39  | 0.15  |      | Expressed protein                                                                          |
| Pc_TC140194 | 0.08  | 0.97  |      | 0.28  | 0.8       |      | -1.6  | 0.26      |      | -2.28 | 0.05  | Down | Expressed protein                                                                          |
| Pc_TC140207 | 1.82  | 0.01  | Up   | 0     | 0         |      | 1.54  | 0.19      |      | -0.43 | 0.69  |      | Histone superfamily protein                                                                |
| Pc_TC140209 | -0.55 | 0.67  |      | 0.61  | 0.6       |      | -4.58 | 0.03      | Down | -0.56 | 0.68  |      | Expressed protein                                                                          |
| Pc_TC140212 | -3.92 | 0.03  | Down | -2.36 | 0.15      |      | -1.33 | 0.42      |      | -2.37 | 0.11  |      | Ribosomal protein L1p/L10e family                                                          |
| Pc_TC140225 | -7.44 | ##### | Down | 0     | 3.37E-043 |      | -8.46 | 1.53E-012 | Down | -9.82 | ##### | Down | Putative retroelement                                                                      |
| Pc_TC140227 | 0.08  | 0.97  |      | -0.9  | 0.41      |      | -2.13 | 0.14      |      | -2.33 | 0.04  | Down | Expressed protein                                                                          |
| Pc_TC140232 | 2.66  | 0.02  | Up   | 0     | 0.27      |      | 1.5   | 0.4       |      | -0.7  | 0.83  |      | Expressed protein                                                                          |
| Pc_TC140251 | 0.77  | 0.13  |      | 0.85  | 0.17      |      | -2.5  | 0.03      | Down | -1.55 | 0.03  | Down | Expressed protein                                                                          |
| Pc_TC140266 | 0.08  | 0.95  |      | -0.61 | 0.52      |      | -2.85 | 0.04      | Down | -1.09 | 0.24  |      | Expressed protein                                                                          |
| Pc_TC140268 | 2.32  | 0.03  | Up   | 0     | 0.15      |      | 0.16  | 1         |      | -0.6  | 0.8   |      | Expressed protein                                                                          |
| Pc_TC140274 | 2.44  | 0     | Up   | 0     | 0         |      | 2.21  | 0.06      |      | 1.16  | 0.19  |      | isovaleryl-CoA-dehydrogenase                                                               |
| Pc_TC140289 | -2.92 | 0     | Down | -1.77 | 0.06      |      | -1.21 | 0.31      |      | -0.25 | 0.78  |      | Expressed protein                                                                          |
| Pc_TC140290 | -2.19 | 0.05  | Down | -3.8  | 0.01      | Down | -0.03 | 1         |      | -0.19 | 0.88  |      | Expressed protein                                                                          |
| Pc_TC140296 | 0     | 0     |      | -3.26 | 0.05      | Down | 0     | 0.01      |      | 0     | 0     |      | Expressed protein                                                                          |
| Pc_TC140314 | 0.08  | 0.96  |      | 1.3   | 0.11      |      | -2.94 | 0.05      | Down | -0.98 | 0.32  |      | Expressed protein                                                                          |
| Pc_TC140315 | 1.17  | 0.16  |      | 2.61  | 0         | Up   | -4.96 | 0.02      | Down | -3.25 | 0.02  | Down | seed gene 1                                                                                |
| Pc_TC140326 | -0.64 | 0.39  |      | 0.18  | 0.83      |      | -3.54 | 0.01      | Down | -1.42 | 0.11  |      | Expressed protein                                                                          |
| Pc_TC140366 | -3.31 | 0.02  | Down | -3.33 | 0.04      | Down | 1.71  | 0.17      |      | -0.68 | 0.57  |      | Expressed protein                                                                          |
| Pc_TC140368 | 2.99  | 0     | Up   | 0     | 0.11      |      | 3.61  | 0.01      | Up   | 1.33  | 0.29  |      | Expressed protein                                                                          |
| Pc_TC140372 | 2.3   | 0.04  | Up   | 0     | 0.2       |      | 2.31  | 0.13      |      | 1.04  | 0.5   |      | Serine protease inhibitor (SERPIN) family protein                                          |
| Pc_TC140373 | 0.94  | 0.41  |      | 2.24  | 0.03      | Up   | -2.37 | 0.25      |      | -1.51 | 0.35  |      | Putative polyprotein                                                                       |
| Pc_TC140380 | 0.68  | 0.45  |      | 1.76  | 0.05      | Up   | -2.7  | 0.1       |      | -1.9  | 0.12  |      | Expressed protein                                                                          |
| Pc_TC140394 | -2.05 | 0.05  | Down | -2.07 | 0.07      |      | 0.21  | 0.89      |      | -1.04 | 0.3   |      | Expressed protein                                                                          |
| Pc_TC140410 | 0.65  | 0.27  |      | 1.07  | 0.11      |      | -2.36 | 0.05      | Down | -0.78 | 0.31  |      | Expressed protein                                                                          |

|             |       |       |      |  |       |      |      |  |       |           |      |       |       |      |                                                  |  |
|-------------|-------|-------|------|--|-------|------|------|--|-------|-----------|------|-------|-------|------|--------------------------------------------------|--|
| Pc_TC140422 | 2.32  | 0.03  | Up   |  | 0     | 0.15 |      |  | 2.09  | 0.16      |      | 0.28  | 0.94  |      | acyl-CoA synthetase 5                            |  |
| Pc_TC140442 | 0.01  | 1     |      |  | 1.07  | 0.15 |      |  | -2.56 | 0.05      | Down | -1.35 | 0.12  |      | Expressed protein                                |  |
| Pc_TC140473 | -0.63 | 0.61  |      |  | 0.93  | 0.38 |      |  | -4.67 | 0.03      | Down | -2.96 | 0.05  | Down | Uncharacterized protein                          |  |
| Pc_TC140480 | 1.11  | 0.19  |      |  | 0.69  | 0.51 |      |  | -3.96 | 0.03      | Down | -3.83 | 0.01  | Down | Expressed protein                                |  |
| Pc_TC140500 | 3.82  | ##### | Up   |  | 0     | 0.11 |      |  | 1.41  | 0.37      |      | 0.63  | 0.69  |      | Expressed protein                                |  |
| Pc_TC140502 | 0.54  | 0.26  |      |  | 0.71  | 0.21 |      |  | -5.18 | 3.46E-005 | Down | -1.9  | 0.01  | Down | Expressed protein                                |  |
| Pc_TC140503 | 0.39  | 0.41  |      |  | 0.79  | 0.16 |      |  | -4.35 | 0         | Down | -1.83 | 0.01  | Down | Uncharacterized protein                          |  |
| Pc_TC140506 | 2.89  | 0.03  | Up   |  | -0.53 | 1    |      |  | 0.92  | 0.76      |      | 1.36  | 0.5   |      | Expressed protein                                |  |
| Pc_TC140520 | 0.24  | 0.47  |      |  | 0.49  | 0.25 |      |  | -1.81 | 0.04      | Down | -1.2  | 0.02  | Down | Expressed protein                                |  |
| Pc_TC140527 | 0.14  | 0.78  |      |  | 0     | 1    |      |  | -2.15 | 0.04      | Down | -1.72 | 0.01  | Down | Expressed protein                                |  |
| Pc_TC140529 | 1.54  | 0.18  |      |  | -0.94 | 0.67 |      |  | 1.75  | 0.24      |      | 2.38  | 0.03  | Up   | glutamate receptor 2.6                           |  |
| Pc_TC140542 | -1.39 | 0.01  | Down |  | 0.67  | 0.26 |      |  | -4.34 | 0         | Down | -2.91 | 0     | Down | putative unclassified                            |  |
| Pc_TC140544 | 1.21  | 0.02  | Up   |  | 1.81  | 0    | Up   |  | -0.21 | 0.85      |      | -1.89 | 0.01  | Down | putative unclassified                            |  |
| Pc_TC140545 | -0.44 | 0.38  |      |  | 1.09  | 0.05 | Up   |  | -1.3  | 0.2       |      | -0.83 | 0.2   |      | putative unclassified                            |  |
| Pc_TC140546 | 0.9   | 0.03  |      |  | 1.21  | 0.02 | Up   |  | -1.52 | 0.12      |      | 0.34  | 0.56  |      | putative unclassified                            |  |
| Pc_TC140553 | -1.14 | 0.42  |      |  | -0.29 | 0.89 |      |  | -0.84 | 0.63      |      | -4.18 | 0.03  | Down | Expressed protein                                |  |
| Pc_TC140556 | 1.85  | 0.01  | Up   |  | 0     | 0    |      |  | 1.87  | 0.11      |      | 0.94  | 0.3   |      | Expressed protein                                |  |
| Pc_TC140558 | -1.02 | 0.23  |      |  | -2.5  | 0.02 | Down |  | -0.53 | 0.67      |      | -0.41 | 0.66  |      | Expressed protein                                |  |
| Pc_TC140567 | 0.4   | 0.71  |      |  | 0.13  | 0.96 |      |  | 3.34  | 0         | Up   | -0.45 | 0.72  |      | Expressed protein                                |  |
| Pc_TC140570 | 0.79  | 0.3   |      |  | 0.77  | 0.38 |      |  | -2.5  | 0.08      |      | -2.74 | 0.02  | Down | Expressed protein                                |  |
| Pc_TC140573 | -2.24 | 0.09  |      |  | -1.26 | 0.34 |      |  | -2.01 | 0.21      |      | -3.7  | 0.02  | Down | Expressed protein                                |  |
| Pc_TC140576 | 1.08  | 0.77  |      |  | 0.64  | 0.98 |      |  | 3.26  | 0.09      |      | 3.21  | 0.04  | Up   | Expressed protein                                |  |
| Pc_TC140638 | 0.89  | 0.33  |      |  | 1.71  | 0.06 |      |  | -3.82 | 0.04      | Down | -1.11 | 0.36  |      | Expressed protein                                |  |
| Pc_TC140662 | 1.55  | 0.15  |      |  | 0     | 0.09 |      |  | 3.14  | 0.02      | Up   | -0.54 | 0.78  |      | Expressed protein                                |  |
| Pc_TC140681 | 1.31  | 0.12  |      |  | 1.78  | 0.05 |      |  | -3.82 | 0.04      | Down | -0.89 | 0.46  |      | Expressed protein                                |  |
| Pc_TC140684 | -0.92 | 0.83  |      |  | 2.76  | 0.04 | Up   |  | 0.09  | 1         |      | 0.95  | 0.64  |      | Expressed protein                                |  |
| Pc_TC140685 | 0.23  | 0.83  |      |  | 0.3   | 0.79 |      |  | -3.67 | 0.03      | Down | -2.54 | 0.04  | Down | OSJNBa0059D20.8 protein                          |  |
| Pc_TC140745 | 0.18  | 0.94  |      |  | 0.64  | 0.61 |      |  | 3.13  | 0.01      | Up   | 1.84  | 0.06  |      | Expressed protein                                |  |
| Pc_TC140754 | -1.46 | 0.16  |      |  | -2.8  | 0.03 | Down |  | -4.35 | 0.01      | Down | -1.53 | 0.16  |      | Putative uncharacterized protein OSJNBb0047K21.2 |  |
| Pc_TC140774 | 1.28  | 0.13  |      |  | 2.09  | 0.02 | Up   |  | -3.23 | 0.07      |      | -1.11 | 0.36  |      | Expressed protein                                |  |
| Pc_TC140797 | 0.43  | 0.63  |      |  | 1.91  | 0.02 | Up   |  | -1.27 | 0.37      |      | -1.77 | 0.11  |      | Expressed protein                                |  |
| Pc_TC140798 | 0.52  | 0.15  |      |  | 0.63  | 0.18 |      |  | -5.56 | 7.47E-007 | Down | -2.54 | ##### | Down | Expressed protein                                |  |
| Pc_TC140799 | 0.58  | 0.17  |      |  | 0.66  | 0.21 |      |  | -6.67 | 3.38E-007 | Down | -2.86 | ##### | Down | Expressed protein                                |  |
| Pc_TC140800 | 0.64  | 0.15  |      |  | 0.73  | 0.18 |      |  | -4.77 | 6.01E-005 | Down | -2    | 0     | Down | Expressed protein                                |  |
| Pc_TC140802 | -0.86 | 0.41  |      |  | 0.7   | 0.48 |      |  | -3.56 | 0.04      | Down | -2.43 | 0.05  |      | Expressed protein                                |  |
| Pc_TC140805 | -0.6  | 0.66  |      |  | -0.62 | 0.67 |      |  | -1.04 | 0.53      |      | -3.37 | 0.04  | Down | Expressed protein                                |  |
| Pc_TC140816 | -0.36 | 0.76  |      |  | 0.23  | 0.86 |      |  | -1.56 | 0.3       |      | -2.9  | 0.03  | Down | Expressed protein                                |  |
| Pc_TC140822 | 0.31  | 0.66  |      |  | 1.04  | 0.16 |      |  | -2.72 | 0.03      | Down | -0.48 | 0.56  |      | Expressed protein                                |  |
| Pc_TC140830 | 0     | 1     |      |  | 1.06  | 0.98 |      |  | 4.5   | 0.03      | Up   | 1.63  | 0.71  |      | Expressed protein                                |  |
| Pc_TC140831 | -0.36 | 0.78  |      |  | 2.15  | 0.02 | Up   |  | 0     | 0.01      |      | -1.82 | 0.16  |      | Expressed protein                                |  |
| Pc_TC140842 | -0.31 | 0.74  |      |  | -1.38 | 0.19 |      |  | -3.16 | 0.03      | Down | -1.23 | 0.22  |      | Expressed protein                                |  |
| Pc_TC140853 | 2.9   | ##### | Up   |  | 0     | 0    |      |  | 1.26  | 0.27      |      | -0.62 | 0.52  |      | Expressed protein                                |  |
| Pc_TC140854 | 0.66  | 0.5   |      |  | 1.87  | 0.05 | Up   |  | 0.79  | 0.57      |      | 0.78  | 0.46  |      | Expressed protein                                |  |
| Pc_TC140894 | -1.92 | 0.17  |      |  | -0.24 | 0.9  |      |  | -2.91 | 0.12      |      | -3.37 | 0.04  | Down | Expressed protein                                |  |
| Pc_TC140912 | -0.03 | 1     |      |  | 1.34  | 0.21 |      |  | 0     | 0.02      |      | -4.18 | 0.03  | Down | Uncharacterized protein                          |  |
| Pc_TC140929 | 2.56  | 0.03  | Up   |  | 0     | 0.27 |      |  | 2.27  | 0.16      |      | -0.11 | 1     |      | GPI transamidase component PIG-S-related         |  |
| Pc_TC140940 | 2.3   | 0.13  |      |  | 2.93  | 0.05 | Up   |  | 0     | 0.36      |      | 0.04  | 1     |      | Expressed protein                                |  |
| Pc_TC140944 | -3.01 | 0.05  |      |  | -4.03 | 0.04 | Down |  | -1.58 | 0.33      |      | -2.46 | 0.09  |      | Os07g0211900 protein (Fragment)                  |  |
| Pc_TC140974 | 2.12  | 0.04  | Up   |  | 0     | 0.11 |      |  | 1.09  | 0.51      |      | 0.43  | 0.82  |      | Expressed protein                                |  |
| Pc_TC140975 | 0.45  | 0.69  |      |  | -0.03 | 1    |      |  | -2    | 0.24      |      | -3.46 | 0.03  | Down | Expressed protein                                |  |
| Pc_TC140980 | 0.02  | 1     |      |  | 0.87  | 0.37 |      |  | 0     | 0         |      | -2.96 | 0.03  | Down | Uncharacterized protein                          |  |
| Pc_TC140990 | 1.45  | 0.14  |      |  | 2.43  | 0.01 | Up   |  | -3.08 | 0.14      |      | -2.96 | 0.1   |      | pyruvate dehydrogenase complex E1 alpha subunit  |  |
| Pc_TC141002 | 0.86  | 0.27  |      |  | -0.04 | 1    |      |  | -4.5  | 0.01      | Down | -1.57 | 0.14  |      | Expressed protein                                |  |
| Pc_TC141005 | -2.18 | 0.07  |      |  | -1.72 | 0.18 |      |  | -0.5  | 0.74      |      | -2.64 | 0.04  | Down | Expressed protein                                |  |
| Pc_TC141009 | 1.63  | 0.07  |      |  | 1.01  | 0.38 |      |  | 2.07  | 0.11      |      | 2.08  | 0.03  | Up   | Expressed protein                                |  |
| Pc_TC141041 | -0.92 | 0.48  |      |  | -1.13 | 0.44 |      |  | 3.8   | 0         | Up   | 2.5   | 0.01  | Up   | Uncharacterized protein                          |  |
| Pc_TC141046 | -0.06 | 0.98  |      |  | -0.55 | 0.61 |      |  | -4.5  | 0.01      | Down | -2.2  | 0.05  |      | Putative uncharacterized protein                 |  |
| Pc_TC141050 | -4.17 | 0.02  | Down |  | -1.19 | 0.38 |      |  | 0.06  | 1         |      | -0.3  | 0.83  |      | Expressed protein                                |  |
| Pc_TC141053 | -0.49 | 0.54  |      |  | 0.8   | 0.32 |      |  | -1.5  | 0.24      |      | -2.08 | 0.03  | Down | Expressed protein                                |  |
| Pc_TC141121 | 0.66  | 0.5   |      |  | -0.79 | 0.56 |      |  | 2.48  | 0.04      | Up   | 2.08  | 0.02  | Up   | Expressed protein                                |  |
| Pc_TC141137 | 1.89  | 0.02  | Up   |  | 0     | 0.01 |      |  | 2.72  | 0.02      | Up   | 1.43  | 0.12  |      | Putative reverse transcriptase                   |  |
| Pc_TC141144 | -3.31 | 0.02  | Down |  | 0     | 0.01 |      |  | -0.37 | 0.82      |      | -1.6  | 0.2   |      | Expressed protein                                |  |

|             |       |      |      |       |      |      |       |      |      |       |       |      |                                                      |     |
|-------------|-------|------|------|-------|------|------|-------|------|------|-------|-------|------|------------------------------------------------------|-----|
| Pc_TC141148 | 0.62  | 0.2  |      | 1.49  | 0.01 | Up   | -3.72 | 0    | Down | 0.23  | 0.72  |      | Expressed protein                                    |     |
| Pc_TC141159 | 0.63  | 0.37 |      | 1.39  | 0.07 |      | -3.58 | 0.01 | Down | -1.24 | 0.18  |      | Expressed protein                                    |     |
| Pc_TC141164 | -0.51 | 0.76 |      | -0.36 | 0.87 |      | 2.17  | 0.1  |      | 2.23  | 0.02  | Up   | Putative reverse transcriptase                       |     |
| Pc_TC141175 | -2.24 | 0.09 |      | 0.82  | 0.43 |      | -0.65 | 0.68 |      | -3.11 | 0.03  | Down | Expressed protein                                    |     |
| Pc_TC141212 | -0.12 | 0.95 |      | 0.86  | 0.39 |      | -4.02 | 0.03 | Down | -3.9  | 0.01  | Down | GTP-binding nuclear protein RAN/TC4                  |     |
| Pc_TC141214 | -0.65 | 0.45 |      | -0.16 | 0.89 |      | -2.75 | 0.05 |      | -2.34 | 0.03  | Down | Expressed protein                                    |     |
| Pc_TC141220 | -3.17 | 0.04 | Down | -1.6  | 0.25 |      | -0.42 | 0.8  |      | -0.23 | 0.88  |      | photosystem II reaction center protein H             |     |
| Pc_TC141225 | 0.08  | 0.92 |      | -0.21 | 0.8  |      | 1.77  | 0.09 |      | 2.19  | 0     | Up   | O-Glycosyl hydrolases family 17 protein              |     |
| Pc_TC141227 | -0.44 | 0.72 |      | 1.09  | 0.27 |      | -3.82 | 0.04 | Down | -1.37 | 0.27  |      | Uncharacterized protein                              |     |
| Pc_TC141229 | -2.73 | 0.05 | Down | -2.75 | 0.07 |      | -2.89 | 0.09 |      | -2.77 | 0.04  | Down | Expressed protein                                    |     |
| Pc_TC141242 | 1.08  | 0.27 |      | 0.15  | 0.96 |      | 2.88  | 0.02 | Up   | 2.04  | 0.03  | Up   | Ecdysteroid-regulated 16 kDa protein                 |     |
| Pc_TC141244 | 1.93  | 0    | Up   | 0     | 0    |      | 0.95  | 0.41 |      | -0.78 | 0.41  |      | Expressed protein                                    |     |
| Pc_TC141268 | 3.72  | 0.01 | Up   | 0     | 0.67 |      | 3.79  | 0.03 | Up   | 2.08  | 0.3   |      | Expressed protein                                    |     |
| Pc_TC141286 | 1.6   | 0.04 | Up   | 1.86  | 0.03 | Up   | 1.84  | 0.13 |      | 0.01  | 1     |      | NAC domain containing protein 103                    | NAC |
| Pc_TC141289 | -1.51 | 0.03 | Down | -0.99 | 0.2  |      | 0.67  | 0.53 |      | 0.6   | 0.4   |      | NAC domain containing protein 103                    | NAC |
| Pc_TC141324 | 0.19  | 0.82 |      | 0     | 1    |      | -2.56 | 0.06 |      | -2.11 | 0.03  | Down | Protein kinase superfamily protein                   |     |
| Pc_TC141339 | 1.28  | 0.07 |      | 2.13  | 0.01 | Up   | -2.01 | 0.15 |      | 0     | 1     |      | Expressed protein                                    |     |
| Pc_TC141380 | 0     | 0    |      | -3.8  | 0.01 | Down | 0     | 0    |      | 0     | 0     |      | Expressed protein                                    |     |
| Pc_TC141424 | -2.85 | 0.01 | Down | -1.6  | 0.13 |      | 1.02  | 0.38 |      | -0.34 | 0.74  |      | Uncharacterized protein                              |     |
| Pc_TC141425 | 0.87  | 0.15 |      | 1     | 0.16 |      | -3.77 | 0    | Down | -0.59 | 0.46  |      | Expressed protein                                    |     |
| Pc_TC141460 | -2.04 | 0.04 | Down | 0.09  | 0.95 |      | -0.23 | 0.87 |      | 0.34  | 0.71  |      | pinoselinol reductase 1                              |     |
| Pc_TC141463 | -1.14 | 0.42 |      | 2.11  | 0.03 | Up   | -0.84 | 0.63 |      | -0.86 | 0.54  |      | heat shock protein 81-2                              |     |
| Pc_TC141465 | -0.31 | 0.74 |      | 0.02  | 1    |      | 2.56  | 0.02 | Up   | 0.9   | 0.29  |      | Putative uncharacterized protein                     |     |
| Pc_TC141531 | 0     | 1    |      | 0.57  | 0.43 |      | -1.7  | 0.15 |      | -2.2  | 0.01  | Down | Expressed protein                                    |     |
| Pc_TC141547 | -1.4  | 0.2  |      | -0.34 | 0.79 |      | -5.14 | 0.01 | Down | 0     | 0     |      | Expressed protein                                    |     |
| Pc_TC141551 | 0.08  | 0.97 |      | -0.43 | 0.71 |      | -3.3  | 0.04 | Down | -0.18 | 0.89  |      | Expressed protein                                    |     |
| Pc_TC141581 | 0.58  | 0.42 |      | 0.79  | 0.33 |      | -2.82 | 0.04 | Down | -0.29 | 0.75  |      | Expressed protein                                    |     |
| Pc_TC141583 | 3.99  | 0.03 | Up   | 0     | 1    |      | 4.03  | 0.07 |      | -0.37 | 1     |      | Expressed protein                                    |     |
| Pc_TC141609 | 0.48  | 0.6  |      | 1.5   | 0.09 |      | -3.56 | 0.04 | Down | -0.63 | 0.58  |      | Expressed protein                                    |     |
| Pc_TC141614 | 2.54  | 0.05 | Up   | 1.23  | 0.53 |      | -1.5  | 0.66 |      | -1.37 | 0.66  |      | Expressed protein                                    |     |
| Pc_TC141629 | -1.69 | 0.09 |      | -0.57 | 0.59 |      | -0.88 | 0.51 |      | -2.46 | 0.03  | Down | Expressed protein                                    |     |
| Pc_TC141641 | 1.03  | 0.11 |      | 1.48  | 0.04 | Up   | -1.18 | 0.33 |      | 0.6   | 0.45  |      | Expressed protein                                    |     |
| Pc_TC141652 | 1.54  | 0.18 |      | 0     | 0.11 |      | 2.5   | 0.07 |      | 2.24  | 0.04  | Up   | Expressed protein                                    |     |
| Pc_TC141653 | -0.55 | 0.46 |      | 0.35  | 0.67 |      | 2.79  | 0.01 | Up   | 1.86  | 0.01  | Up   | Expressed protein                                    |     |
| Pc_TC141659 | -0.57 | 0.5  |      | -1.4  | 0.16 |      | -2.26 | 0.1  |      | -2.83 | 0.01  | Down | Expressed protein                                    |     |
| Pc_TC141665 | -2.92 | 0.03 | Down | -2.53 | 0.07 |      | 1.19  | 0.34 |      | -0.37 | 0.75  |      | Expressed protein                                    |     |
| Pc_TC141668 | -0.09 | 0.86 |      | -0.23 | 0.7  |      | -1.05 | 0.29 |      | -1.46 | 0.03  | Down | Expressed protein                                    |     |
| Pc_TC141683 | -2.05 | 0.05 | Down | -0.82 | 0.43 |      | 0.52  | 0.68 |      | -1.18 | 0.24  |      | Expressed protein                                    |     |
| Pc_TC141721 | -2.92 | 0.21 |      | 2.67  | 0.01 | Up   | 1.03  | 0.54 |      | -0.37 | 0.89  |      | Expressed protein                                    |     |
| Pc_TC141728 | -0.62 | 0.68 |      | -0.18 | 0.96 |      | -0.11 | 0.99 |      | -4.08 | 0.04  | Down | Expressed protein                                    |     |
| Pc_TC141736 | 1.38  | 0.03 | Up   | 1.11  | 0.14 |      | -2.57 | 0.05 |      | 1.78  | 0.02  | Up   | Expressed protein                                    |     |
| Pc_TC141745 | -2.34 | 0.01 | Down | -2.53 | 0.02 | Down | -2.62 | 0.06 |      | -2.05 | 0.04  | Down | Putative uncharacterized protein                     |     |
| Pc_TC141748 | 0.74  | 0.44 |      | 0.94  | 0.36 |      | -0.84 | 0.59 |      | 2.04  | 0.02  | Up   | Expressed protein                                    |     |
| Pc_TC141749 | -1.08 | 0.02 | Down | -0.75 | 0.19 |      | 0.47  | 0.61 |      | -0.09 | 0.88  |      | Reverse transcriptase (RNA-dependent DNA polymerase) |     |
| Pc_TC141765 | 1.08  | 0.37 |      | 1.14  | 0.39 |      | 3.06  | 0.02 | Up   | 1.85  | 0.1   |      | Expressed protein                                    |     |
| Pc_TC141800 | 1.08  | 0.77 |      | 1.06  | 0.8  |      | 3.67  | 0.04 | Up   | 2.53  | 0.16  |      | Uncharacterized protein                              |     |
| Pc_TC141816 | 2.49  | 0.02 | Up   | 0     | 0.2  |      | 1.96  | 0.21 |      | -1.37 | 0.55  |      | Expressed protein                                    |     |
| Pc_TC141828 | -0.38 | 0.66 |      | -0.12 | 0.93 |      | 2.96  | 0.01 | Up   | 1.58  | 0.04  | Up   | Expressed protein                                    |     |
| Pc_TC141840 | -0.78 | 0.16 |      | -1.42 | 0.04 | Down | 1.93  | 0.05 | Up   | 0.45  | 0.5   |      | Expressed protein                                    |     |
| Pc_TC141858 | -0.3  | 0.74 |      | 0.92  | 0.28 |      | -1.53 | 0.25 |      | -3.66 | 0     | Down | Expressed protein                                    |     |
| Pc_TC141861 | -2.45 | 0.01 | Down | -0.47 | 0.61 |      | -4.61 | 0    | Down | 0     | ##### |      | heat shock cognate protein 70-1                      |     |
| Pc_TC141863 | -0.81 | 0.45 |      | 0.06  | 1    |      | -4.08 | 0.03 | Down | -1.64 | 0.17  |      | Expressed protein                                    |     |
| Pc_TC141873 | -0.48 | 0.52 |      | 0.8   | 0.3  |      | -2.54 | 0.05 |      | -2.33 | 0.01  | Down | Expressed protein                                    |     |
| Pc_TC141896 | 0.43  | 0.32 |      | 0.71  | 0.18 |      | -2.18 | 0.03 | Down | -0.63 | 0.31  |      | Expressed protein                                    |     |
| Pc_TC141905 | 1.93  | 0.14 |      | 1.44  | 0.37 |      | 2.57  | 0.1  |      | 2.63  | 0.03  | Up   | Expressed protein                                    |     |
| Pc_TC141928 | 2.85  | 0    | Up   | 0     | 0.05 |      | 1.5   | 0.29 |      | 0.69  | 0.6   |      | nucleosome assembly protein1;1                       |     |
| Pc_TC141952 | -0.99 | 0.24 |      | 0.93  | 0.25 |      | 0     | 0    |      | -2.44 | 0.02  | Down | Expressed protein                                    |     |
| Pc_TC141957 | -3.09 | 0.17 |      | 0     | 0.09 |      | 2.99  | 0.02 | Up   | 0.63  | 0.67  |      | Expressed protein                                    |     |
| Pc_TC141964 | -2.51 | 0.05 | Down | 1.15  | 0.22 |      | -5.08 | 0.01 | Down | -4.96 | 0     | Down | Uncharacterized protein                              |     |
| Pc_TC141966 | 0.35  | 0.5  |      | 0.51  | 0.41 |      | -1.92 | 0.08 |      | -1.53 | 0.03  | Down | Os03g0643433 protein                                 |     |
| Pc_TC141975 | 0.39  | 0.31 |      | 0.3   | 0.54 |      | -2.11 | 0.03 | Down | -1.43 | 0.02  | Down | Expressed protein                                    |     |
| Pc_TC141982 | -0.3  | 0.61 |      | -0.59 | 0.4  |      | -2.04 | 0.07 |      | -1.45 | 0.05  | Down | Expressed protein                                    |     |

|             |       |       |      |       |           |      |       |           |      |       |      |      |                                                               |
|-------------|-------|-------|------|-------|-----------|------|-------|-----------|------|-------|------|------|---------------------------------------------------------------|
| Pc_TC142001 | -1.46 | 0.06  |      | 0.57  | 0.47      |      | -2.41 | 0.06      |      | -2.29 | 0.01 | Down | Ribosomal protein S5/Elongation factor G/III/V family protein |
| Pc_TC142026 | 3.13  | ##### | Up   | 0     | 0         |      | 2.63  | 0.02      | Up   | 1.48  | 0.08 |      | Expressed protein                                             |
| Pc_TC142027 | -1.73 | 0.11  |      | -2.75 | 0.04      | Down | 1.02  | 0.41      |      | 0.1   | 0.95 |      | Expressed protein                                             |
| Pc_TC142029 | -1.51 | 0.18  |      | 0.43  | 0.7       |      | -4.08 | 0.03      | Down | 0     | 0    |      | Expressed protein                                             |
| Pc_TC142039 | 2.52  | 0     | Up   | 0     | 0.01      |      | 1.11  | 0.39      |      | 0.3   | 0.8  |      | Expressed protein                                             |
| Pc_TC142041 | 1.89  | 0.19  |      | 2.76  | 0.04      | Up   | -1.5  | 0.66      |      | 0.43  | 0.93 |      | Expressed protein                                             |
| Pc_TC142091 | 1.72  | 0.02  | Up   | 0     | 0         |      | 1.23  | 0.32      |      | -1.11 | 0.32 |      | AMP deaminase,putative                                        |
| Pc_TC142097 | -1.76 | 0.01  | Down | -0.98 | 0.19      |      | -0.15 | 0.89      |      | 0.03  | 0.97 |      | Expressed protein                                             |
| Pc_TC142110 | 0.17  | 0.88  |      | -0.55 | 0.62      |      | 2.08  | 0.07      |      | 1.66  | 0.05 | Up   | Putative uncharacterized protein P0479D12.12                  |
| Pc_TC142111 | 0.24  | 0.69  |      | 0.9   | 0.17      |      | -2.3  | 0.05      | Down | -2.1  | 0.01 | Down | Expressed protein                                             |
| Pc_TC142119 | 2.03  | 0.02  | Up   | 1.81  | 0.07      |      | 2.65  | 0.04      | Up   | 1.72  | 0.08 |      | Os06g0134300 protein                                          |
| Pc_TC142120 | -1.27 | 0.05  |      | -3.32 | 0         | Down | -2.21 | 0.06      |      | -0.9  | 0.23 |      | Os06g0134300 protein                                          |
| Pc_TC142122 | -1.22 | 0.05  | Down | -0.77 | 0.27      |      | 1.19  | 0.24      |      | 0.6   | 0.37 |      | Expressed protein                                             |
| Pc_TC142127 | -2.51 | 0.05  | Down | 0     | 1         |      | 0.7   | 0.59      |      | -0.26 | 0.84 |      | Putative uncharacterized protein                              |
| Pc_TC142131 | 0.1   | 0.91  |      | 0.66  | 0.38      |      | -2.74 | 0.03      | Down | -1.1  | 0.19 |      | Expressed protein                                             |
| Pc_TC142142 | -0.19 | 0.85  |      | 0.02  | 1         |      | -2.04 | 0.15      |      | -2.92 | 0.01 | Down | Expressed protein                                             |
| Pc_TC142144 | 2.17  | 0.03  | Up   | 1.06  | 0.46      |      | 1.2   | 0.46      |      | 1.21  | 0.35 |      | Expressed protein                                             |
| Pc_TC142145 | 2.89  | 0.03  | Up   | 0     | 0.48      |      | 2.67  | 0.13      |      | 1.04  | 0.66 |      | Expressed protein                                             |
| Pc_TC142156 | 2.51  | 0.03  | Up   | 2.26  | 0.09      |      | 2.23  | 0.17      |      | 2.06  | 0.12 |      | Expressed protein                                             |
| Pc_TC142160 | -0.62 | 0.48  |      | 0.23  | 0.82      |      | -2.97 | 0.04      | Down | -2.49 | 0.02 | Down | Expressed protein                                             |
| Pc_TC142161 | 0.63  | 0.47  |      | 1.24  | 0.17      |      | -4.2  | 0.02      | Down | -4.08 | 0.01 | Down | Expressed protein                                             |
| Pc_TC142168 | 1.82  | 0.29  |      | 3.17  | 0.02      | Up   | 0     | 0.36      |      | 1.04  | 0.66 |      | Expressed protein                                             |
| Pc_TC142188 | 0.25  | 0.55  |      | 0.42  | 0.41      |      | -1.57 | 0.11      |      | -1.49 | 0.02 | Down | Expressed protein                                             |
| Pc_TC142192 | 3.25  | 0     | Up   | 0     | 0.36      |      | 2.55  | 0.12      |      | 0.43  | 0.93 |      | Expressed protein                                             |
| Pc_TC142193 | 0.12  | 0.92  |      | 1.25  | 0.15      |      | -4.5  | 0.01      | Down | -2.57 | 0.03 | Down | Expressed protein                                             |
| Pc_TC142196 | -1.71 | 0.03  | Down | -0.44 | 0.61      |      | -0.85 | 0.47      |      | -0.55 | 0.51 |      | Expressed protein                                             |
| Pc_TC142203 | -0.37 | 0.7   |      | -2.44 | 0.04      | Down | -1.06 | 0.43      |      | -0.88 | 0.39 |      | Expressed protein                                             |
| Pc_TC142208 | -0.05 | 0.98  |      | -0.44 | 0.64      |      | -1.69 | 0.19      |      | -3.15 | 0    | Down | Expressed protein                                             |
| Pc_TC142216 | 0.32  | 0.36  |      | 0.14  | 0.76      |      | -2.92 | 0         | Down | -1.68 | 0    | Down | Expressed protein                                             |
| Pc_TC142223 | 1.29  | 0.02  | Up   | 1.08  | 0.11      |      | -1.22 | 0.28      |      | -1.14 | 0.14 |      | EF-TU receptor                                                |
| Pc_TC142224 | -0.36 | 0.6   |      | 2.53  | 7.88E-005 | Up   | 0.55  | 0.61      |      | 1.98  | 0    | Up   | EF-TU receptor                                                |
| Pc_TC142225 | 0.67  | 0.16  |      | 0.68  | 0.24      |      | -1.25 | 0.22      |      | 1.43  | 0.02 | Up   | EF-TU receptor                                                |
| Pc_TC142227 | 2.86  | ##### | Up   | 0     | 0         |      | 2.14  | 0.06      |      | 1.78  | 0.02 | Up   | Expressed protein                                             |
| Pc_TC142255 | 0.64  | 0.04  |      | 0.31  | 0.45      |      | -1.74 | 0.05      | Down | -0.14 | 0.78 |      | Expressed protein                                             |
| Pc_TC142268 | 0.96  | 0.03  |      | 1.03  | 0.06      |      | -5.19 | 2.88E-005 | Down | -2.41 | 0    | Down | G-box binding protein                                         |
| Pc_TC142269 | -0.26 | 0.86  |      | 0.33  | 0.8       |      | -4.74 | 0.03      | Down | 0     | 0    |      | Expressed protein                                             |
| Pc_TC142286 | 1.89  | 0.01  | Up   | 0.36  | 0.74      |      | 1.4   | 0.25      |      | 1.17  | 0.19 |      | Expressed protein                                             |
| Pc_TC142289 | 1.08  | 0.97  |      | 2.87  | 0.28      |      | 0     | 0.87      |      | 4.83  | 0    | Up   | Expressed protein                                             |
| Pc_TC142295 | 3.33  | 0.03  | Up   | 0     | 0.67      |      | 3.2   | 0.09      |      | 1.63  | 0.49 |      | NAD(P)-linked oxidoreductase superfamily protein              |
| Pc_TC142300 | 0.31  | 0.65  |      | 0.39  | 0.62      |      | 1.78  | 0.09      |      | 1.48  | 0.04 | Up   | Expressed protein                                             |
| Pc_TC142318 | -0.04 | 0.93  |      | 0.71  | 0.19      |      | -2.99 | 0.01      | Down | -2.17 | 0    | Down | Expressed protein                                             |
| Pc_TC142327 | -0.56 | 0.28  |      | -1.68 | 0.01      | Down | 1.37  | 0.15      |      | 0.01  | 0.99 |      | Expressed protein                                             |
| Pc_TC142334 | -0.13 | 0.98  |      | -0.26 | 0.89      |      | -0.82 | 0.63      |      | -4.28 | 0.02 | Down | Expressed protein                                             |
| Pc_TC142362 | -4.01 | 0.02  | Down | -1.71 | 0.25      |      | 0.12  | 0.98      |      | -0.37 | 0.79 |      | Expressed protein                                             |
| Pc_TC142367 | -2.45 | 0.05  |      | -0.56 | 0.65      |      | -2.44 | 0.13      |      | -4.9  | 0    | Down | Ribosomal protein S5/Elongation factor G/III/V family protein |
| Pc_TC142390 | 2.7   | 0.01  | Up   | 2.2   | 0.06      |      | -1.72 | 0.47      |      | 0.52  | 0.78 |      | Expressed protein                                             |
| Pc_TC142391 | 0.25  | 0.79  |      | -0.14 | 0.92      |      | 3.62  | 0         | Up   | 1.85  | 0.02 | Up   | Expressed protein                                             |
| Pc_TC142399 | 1.86  | 0.03  | Up   | 0     | 0.02      |      | 1.5   | 0.25      |      | -1.37 | 0.31 |      | Expressed protein                                             |
| Pc_TC142422 | -1.51 | 0.05  |      | -1.3  | 0.14      |      | -1.18 | 0.32      |      | -3.02 | 0    | Down | Expressed protein                                             |
| Pc_TC142429 | 0.62  | 0.28  |      | 0.84  | 0.21      |      | -3.38 | 0.01      | Down | -1.4  | 0.07 |      | Expressed protein                                             |
| Pc_TC142438 | 1.82  | 0.01  | Up   | 0     | 0         |      | 1.81  | 0.12      |      | -0.58 | 0.58 |      | Os02g0673500 protein                                          |
| Pc_TC142446 | 2.13  | 0     | Up   | 0     | 0.01      |      | 1.93  | 0.11      |      | -0.12 | 0.95 |      | Expressed protein                                             |
| Pc_TC142457 | 0.3   | 0.73  |      | 0.62  | 0.49      |      | -4.67 | 0.01      | Down | -1.96 | 0.07 |      | Expressed protein                                             |
| Pc_TC142485 | -3.09 | 0.04  | Down | -0.53 | 0.71      |      | -1.21 | 0.45      |      | -1.74 | 0.19 |      | Expressed protein                                             |
| Pc_TC142502 | -1.58 | 0.21  |      | -4.19 | 0.03      | Down | -1.42 | 0.37      |      | -2.04 | 0.13 |      | Expressed protein                                             |
| Pc_TC142512 | 1.27  | 0.1   |      | 1.69  | 0.05      | Up   | -3.3  | 0.04      | Down | -2.18 | 0.06 |      | Putative uncharacterized protein                              |
| Pc_TC142530 | -0.68 | 0.54  |      | 0.35  | 0.77      |      | -3.96 | 0.03      | Down | -2.83 | 0.04 | Down | Cytoplasmic tRNA 2-thiolation protein 2                       |
| Pc_TC142540 | -2.46 | 0.03  | Down | 1.11  | 0.21      |      | -4.35 | 0.01      | Down | -2.43 | 0.04 | Down | Expressed protein                                             |
| Pc_TC142559 | 2.02  | 0.03  | Up   | 0     | 0.04      |      | 1.28  | 0.37      |      | -0.79 | 0.61 |      | GTP binding Elongation factor Tu family protein               |
| Pc_TC142562 | 0.11  | 0.92  |      | 1.19  | 0.14      |      | -3.08 | 0.03      | Down | -0.77 | 0.42 |      | Expressed protein                                             |
| Pc_TC142587 | 2.95  | 0     | Up   | 0     | 0.2       |      | 3.07  | 0.03      | Up   | -1.96 | 0.4  |      | Expressed protein                                             |
| Pc_TC142600 | -2.24 | 0.01  | Down | -1.68 | 0.07      |      | 1.03  | 0.35      |      | 0.13  | 0.89 |      | Expressed protein                                             |



|             |       |       |      |       |           |      |       |      |      |       |      |      |                                                        |
|-------------|-------|-------|------|-------|-----------|------|-------|------|------|-------|------|------|--------------------------------------------------------|
| Pc_TC142602 | 1.9   | 0.02  | Up   | 0     | 0.01      |      | 1.75  | 0.16 |      | 0.59  | 0.59 |      | Expressed protein                                      |
| Pc_TC142603 | 4.01  | ##### | Up   | 0     | 0.01      |      | 2.52  | 0.04 | Up   | 1.04  | 0.3  |      | aldehyde dehydrogenase 2C4                             |
| Pc_TC142612 | 1.47  | 0.1   |      | 2.19  | 0.02      | Up   | -1.17 | 0.48 |      | -1.37 | 0.31 |      | Expressed protein                                      |
| Pc_TC142639 | 2.44  | 0.01  | Up   | 0     | 0.11      |      | 2.2   | 0.12 |      | -0.37 | 0.89 |      | Expressed protein                                      |
| Pc_TC142661 | -0.24 | 1     |      | 2.74  | 0.03      | Up   | -1.82 | 0.53 |      | 0     | 0.16 |      | Expressed protein                                      |
| Pc_TC142670 | 1.61  | 0.02  | Up   | 0     | 0         |      | 1.23  | 0.29 |      | -0.54 | 0.58 |      | Expressed protein                                      |
| Pc_TC142672 | 0.49  | 0.17  |      | 1.19  | 0.01      | Up   | -3.14 | 0    | Down | -0.82 | 0.13 |      | Expressed protein                                      |
| Pc_TC142674 | 2.78  | 0.02  | Up   | 0     | 0.36      |      | 3.31  | 0.03 | Up   | 1.71  | 0.27 |      | cytochrome P450, family 82, subfamily G, polypeptide 1 |
| Pc_TC142680 | 1.55  | 0.15  |      | 2.53  | 0.02      | Up   | 0.03  | 1    |      | -0.37 | 0.87 |      | Expressed protein                                      |
| Pc_TC142692 | 1.08  | 0.22  |      | 1.92  | 0.04      | Up   | 0     | 0.01 |      | 0     | 0    |      | Expressed protein                                      |
| Pc_TC142707 | 1.08  | 0.47  |      | 2.43  | 0.05      | Up   | 0     | 0.14 |      | 1.21  | 0.41 |      | Expressed protein                                      |
| Pc_TC142736 | 1.52  | 0.1   |      | 2.38  | 0.01      | Up   | -1.5  | 0.39 |      | 0.34  | 0.81 |      | Expressed protein                                      |
| Pc_TC142756 | 2.17  | 0     | Up   | 0     | 0         |      | 1.4   | 0.25 |      | 0.81  | 0.39 |      | Expressed protein                                      |
| Pc_TC142762 | -0.71 | 0.32  |      | -0.03 | 0.98      |      | 1     | 0.35 |      | 1.78  | 0.01 | Up   | Expressed protein                                      |
| Pc_TC142766 | 0.92  | 0.2   |      | 0.91  | 0.27      |      | -2.72 | 0.05 |      | -2.18 | 0.04 | Down | Expressed protein                                      |
| Pc_TC142773 | 2.32  | 0     | Up   | 0     | 0.01      |      | 0.78  | 0.56 |      | -0.18 | 0.91 |      | chaperonin 10                                          |
| Pc_TC142787 | 2.16  | 0.03  | Up   | 0     | 0.09      |      | 0.14  | 1    |      | -1.96 | 0.29 |      | Expressed protein                                      |
| Pc_TC142792 | 0.39  | 0.53  |      | 1.43  | 0.03      | Up   | -1.48 | 0.19 |      | -0.39 | 0.61 |      | Expressed protein                                      |
| Pc_TC142796 | -0.55 | 0.67  |      | -3.03 | 0.08      |      | -0.58 | 0.72 |      | -3.46 | 0.03 | Down | Expressed protein                                      |
| Pc_TC142815 | 0.3   | 0.86  |      | 0.17  | 0.96      |      | 2.8   | 0.03 | Up   | 1.85  | 0.07 |      | Expressed protein                                      |
| Pc_TC142823 | 0.25  | 0.95  |      | -0.62 | 0.8       |      | 3.34  | 0.01 | Up   | 2.08  | 0.06 |      | Expressed protein                                      |
| Pc_TC142824 | 2.28  | 0.01  | Up   | 1.87  | 0.09      |      | -0.65 | 0.76 |      | 0.76  | 0.56 |      | Expressed protein                                      |
| Pc_TC142836 | -1.82 | 0.03  | Down | -1.36 | 0.15      |      | -0.95 | 0.44 |      | -1.54 | 0.09 |      | Expressed protein                                      |
| Pc_TC142837 | 1.25  | 0.17  |      | 1.96  | 0.04      | Up   | -2.5  | 0.16 |      | -1.05 | 0.43 |      | Expressed protein                                      |
| Pc_TC142848 | 2.32  | 0     | Up   | 0     | 0         |      | 1.83  | 0.11 |      | -0.17 | 0.89 |      | Expressed protein                                      |
| Pc_TC142859 | -0.69 | 0.59  |      | 0.29  | 0.84      |      | -1.26 | 0.44 |      | -3.46 | 0.03 | Down | Microsomal epoxide hydrolase                           |
| Pc_TC142860 | 3.89  | 0.04  | Up   | 0     | 1         |      | 2.31  | 0.48 |      | 2.95  | 0.22 |      | Expressed protein                                      |
| Pc_TC142863 | -0.07 | 1     |      | 2.38  | 0.02      | Up   | 0.09  | 1    |      | 1.35  | 0.24 |      | Expressed protein                                      |
| Pc_TC142865 | 0.31  | 0.62  |      | 0.13  | 0.87      |      | -2.4  | 0.04 | Down | -1.47 | 0.07 |      | Expressed protein                                      |
| Pc_TC142872 | -3.73 | 0.05  | Down | 0.16  | 0.96      |      | -1.98 | 0.27 |      | -4.18 | 0.03 | Down | Expressed protein                                      |
| Pc_TC142878 | 0     | 0.22  |      | 0     | 0.27      |      | 4.61  | 0    | Up   | 2.73  | 0.02 | Up   | Expressed protein                                      |
| Pc_TC142888 | 0.18  | 0.75  |      | 1.06  | 0.09      |      | -2.85 | 0.01 | Down | -1.69 | 0.02 | Down | Expressed protein                                      |
| Pc_TC142901 | -0.57 | 0.6   |      | 0.46  | 0.67      |      | -1.05 | 0.47 |      | -5.02 | 0    | Down | Putative ceramide kinase                               |
| Pc_TC142911 | 2.1   | 0     | Up   | 0     | 1.10E-006 |      | 1.59  | 0.13 |      | 0.18  | 0.83 |      | ATP synthase alpha/beta family protein                 |
| Pc_TC142937 | -2.73 | 0.02  | Down | 0     | 0         |      | 1.37  | 0.26 |      | -0.66 | 0.54 |      | Expressed protein                                      |
| Pc_TC142963 | 0.32  | 0.66  |      | 1.02  | 0.18      |      | -5.4  | 0    | Down | -0.76 | 0.38 |      | Expressed protein                                      |
| Pc_TC142964 | 2.18  | 0     | Up   | 0     | 0         |      | 2.04  | 0.07 |      | 0.94  | 0.27 |      | isocitrate dehydrogenase 1                             |
| Pc_TC142968 | 2.48  | ##### | Up   | 0     | 4.69E-005 |      | 1.6   | 0.15 |      | 0.45  | 0.6  |      | Aldolase superfamily protein                           |
| Pc_TC142970 | -1.45 | 0.21  |      | -2.88 | 0.05      | Down | -0.21 | 0.9  |      | -0.51 | 0.67 |      | Expressed protein                                      |
| Pc_TC143014 | -0.48 | 0.64  |      | 0.01  | 1         |      | 1.28  | 0.29 |      | 1.74  | 0.04 | Up   | Expressed protein                                      |
| Pc_TC143015 | 0.63  | 0.42  |      | 0.33  | 0.74      |      | 2.63  | 0.02 | Up   | 1.99  | 0.01 | Up   | Expressed protein                                      |
| Pc_TC143018 | -3.6  | 0     | Down | -1.36 | 0.13      |      | 1.23  | 0.26 |      | -0.27 | 0.76 |      | Expressed protein                                      |
| Pc_TC143020 | -1.92 | 0.02  | Down | -3.53 | 0         | Down | 1.49  | 0.17 |      | 1.05  | 0.16 |      | Expressed protein                                      |
| Pc_TC143034 | 0.89  | 0.22  |      | 2.29  | 0         | Up   | 1.15  | 0.32 |      | 1.16  | 0.15 |      | EF-TU receptor                                         |
| Pc_TC143038 | 0.34  | 0.8   |      | 0     | 0.02      |      | 2.79  | 0.02 | Up   | -1.47 | 0.29 |      | Uncharacterized protein                                |
| Pc_TC143039 | 2.9   | ##### | Up   | 0     | 0         |      | 0.5   | 0.71 |      | 2.11  | 0.01 | Up   | Expressed protein                                      |
| Pc_TC143069 | -1.28 | 0.12  |      | -1.79 | 0.07      |      | -3.25 | 0.02 | Down | -4.13 | 0    | Down | Expressed protein                                      |
| Pc_TC143073 | -2.73 | 0.05  | Down | -3.33 | 0.04      | Down | 1.41  | 0.26 |      | 0.72  | 0.47 |      | Expressed protein                                      |
| Pc_TC143076 | -1.06 | 0.35  |      | -0.15 | 0.94      |      | -3.96 | 0.03 | Down | -1.37 | 0.25 |      | Expressed protein                                      |
| Pc_TC143084 | -0.12 | 0.88  |      | 0.31  | 0.71      |      | -1.25 | 0.3  |      | -3.16 | 0    | Down | Expressed protein                                      |
| Pc_TC143090 | -0.18 | 0.92  |      | -0.2  | 0.92      |      | -1.5  | 0.35 |      | -3.54 | 0.03 | Down | Expressed protein                                      |
| Pc_TC143092 | 0.2   | 0.84  |      | -0.9  | 0.4       |      | 3.03  | 0.01 | Up   | 1.67  | 0.04 | Up   | Putative uncharacterized protein                       |
| Pc_TC143101 | 2.54  | 0.05  | Up   | 2.23  | 0.13      |      | 1.31  | 0.53 |      | 1.53  | 0.35 |      | Expressed protein                                      |
| Pc_TC143118 | -1.59 | 0.04  | Down | -2.32 | 0.01      | Down | 1.23  | 0.26 |      | -0.66 | 0.43 |      | cysteine-rich RLK (RECEPTOR-like protein kinase) 8     |
| Pc_TC143134 | 0.36  | 0.56  |      | 0.6   | 0.39      |      | -3.28 | 0.01 | Down | -1.89 | 0.02 | Down | Putative uncharacterized protein                       |
| Pc_TC143142 | 1.31  | 0.04  | Up   | 0     | 6.86E-006 |      | 1.52  | 0.16 |      | -0.94 | 0.28 |      | Zinc-binding ribosomal protein family protein          |
| Pc_TC143152 | 3.33  | 0.03  | Up   | 0     | 0.67      |      | 2.59  | 0.22 |      | -1.37 | 0.88 |      | Endonuclease-reverse transcriptase                     |
| Pc_TC143153 | 3.44  | 0     | Up   | 0     | 0.36      |      | 2.15  | 0.22 |      | -1.37 | 0.66 |      | Expressed protein                                      |
| Pc_TC143154 | 0.34  | 0.76  |      | -0.09 | 0.99      |      | 1.16  | 0.37 |      | 1.96  | 0.03 | Up   | Expressed protein                                      |
| Pc_TC143186 | -1.34 | 0.23  |      | -0.72 | 0.55      |      | -1.27 | 0.39 |      | -2.96 | 0.03 | Down | Uncharacterized protein                                |
| Pc_TC143191 | -1.75 | 0.04  | Down | -2.07 | 0.04      | Down | 1.97  | 0.07 |      | 0.64  | 0.42 |      | Expressed protein                                      |
| Pc_TC143196 | 0.06  | 0.91  |      | 0.16  | 0.78      |      | -3.19 | 0    | Down | -1.63 | 0.01 | Down | Expressed protein                                      |

|             |       |       |      |  |       |           |      |       |           |      |  |       |       |      |                                                    |
|-------------|-------|-------|------|--|-------|-----------|------|-------|-----------|------|--|-------|-------|------|----------------------------------------------------|
| Pc_TC143207 | 0.69  | 0.33  |      |  | -4.56 | 0         | Down | 0.85  | 0.46      |      |  | -0.29 | 0.76  |      | aldehyde dehydrogenase 7B4                         |
| Pc_TC143236 | 0.28  | 0.54  |      |  | 1.25  | 0.02      | Up   | -3.85 | 0         | Down |  | -2.01 | 0     | Down | Expressed protein                                  |
| Pc_TC143291 | 1.34  | 0.37  |      |  | 2.69  | 0.03      | Up   | 0.88  | 0.69      |      |  | 0.89  | 0.63  |      | Expressed protein                                  |
| Pc_TC143301 | 0.23  | 0.83  |      |  | -3.16 | 0.02      | Down | -2.3  | 0.12      |      |  | -0.18 | 0.89  |      | RNI-like superfamily protein                       |
| Pc_TC143323 | 2.32  | ##### | Up   |  | 0     | 1.16E-005 |      | 1.77  | 0.1       |      |  | 0.34  | 0.69  |      | Expressed protein                                  |
| Pc_TC143331 | -2.51 | 0.01  | Down |  | -0.87 | 0.38      |      | -3.89 | 0.01      | Down |  | -2.07 | 0.04  | Down | Expressed protein                                  |
| Pc_TC143365 | 2.78  | 0.02  | Up   |  | 0     | 0.36      |      | 1.59  | 0.41      |      |  | 0.21  | 1     |      | Expressed protein                                  |
| Pc_TC143367 | 2.94  | 0.01  | Up   |  | 0     | 0.36      |      | 1.5   | 0.45      |      |  | 0.43  | 0.93  |      | Uncharacterized protein                            |
| Pc_TC143374 | 3.19  | 0.01  | Up   |  | 1.28  | 0.58      |      | 1.73  | 0.42      |      |  | 3.66  | 0     | Up   | Expressed protein                                  |
| Pc_TC143377 | 0.13  | 0.88  |      |  | 0.81  | 0.3       |      | -3.6  | 0.01      | Down |  | -1.42 | 0.11  |      | Expressed protein                                  |
| Pc_TC143384 | 0.21  | 0.81  |      |  | 0.99  | 0.23      |      | -2.15 | 0.12      |      |  | -2.56 | 0.02  | Down | Expressed protein                                  |
| Pc_TC143397 | 1.66  | 0.48  |      |  | 3.31  | 0.04      | Up   | 2.9   | 0.15      |      |  | 1.63  | 0.49  |      | Pathogenesis-related thaumatin superfamily protein |
| Pc_TC143417 | 1.47  | 0.1   |      |  | 1.92  | 0.04      | Up   | -0.04 | 1         |      |  | 1.08  | 0.29  |      | fucosyltransferase 2                               |
| Pc_TC143418 | 0.03  | 1     |      |  | 1.15  | 0.19      |      | -1.13 | 0.41      |      |  | -2.52 | 0.03  | Down | EPS15 homology domain 1                            |
| Pc_TC143425 | 0.08  | 1     |      |  | 2.38  | 0.03      | Up   | -0.67 | 0.76      |      |  | -0.54 | 0.78  |      | Expressed protein                                  |
| Pc_TC143439 | -2.66 | 0.06  |      |  | -3.26 | 0.05      | Down | -0.01 | 1         |      |  | -1.37 | 0.27  |      | Expressed protein                                  |
| Pc_TC143463 | 0.79  | 0.33  |      |  | 0.16  | 0.91      |      | 2.29  | 0.05      | Up   |  | 0.91  | 0.32  |      | Expressed protein                                  |
| Pc_TC143465 | -3.68 | 0.01  | Down |  | 0     | 1         |      | -0.61 | 0.67      |      |  | -1.43 | 0.2   |      | Uncharacterized protein                            |
| Pc_TC143466 | -2.21 | 0.01  | Down |  | -2.42 | 0.01      | Down | -2.78 | 0.03      | Down |  | -1.85 | 0.03  | Down | Uncharacterized protein                            |
| Pc_TC143469 | 2.65  | 0     | Up   |  | 0     | 0.01      |      | 1.69  | 0.17      |      |  | 0.8   | 0.43  |      | Expressed protein                                  |
| Pc_TC143474 | 0.3   | 0.81  |      |  | -0.53 | 0.71      |      | 2.96  | 0.01      | Up   |  | 1.74  | 0.06  |      | Expressed protein                                  |
| Pc_TC143477 | -2.6  | 0     | Down |  | -0.88 | 0.24      |      | -4.17 | 0         | Down |  | -1.52 | 0.05  |      | Expressed protein                                  |
| Pc_TC143480 | -0.47 | 0.71  |      |  | -0.73 | 0.58      |      | -3.74 | 0.05      | Down |  | -1.45 | 0.25  |      | OSJNBa0088A01.7 protein                            |
| Pc_TC143498 | 2.89  | 0     | Up   |  | 0     | 0.15      |      | 1.45  | 0.37      |      |  | 0.72  | 0.65  |      | peptidase M1 family protein                        |
| Pc_TC143499 | -6.57 | ##### | Down |  | -6.59 | 1.31E-009 | Down | -1.87 | 0.08      |      |  | -7.02 | ##### | Down | NADH dehydrogenase subunit 4                       |
| Pc_TC143501 | 2.66  | 0.12  |      |  | 3.31  | 0.04      | Up   | 0.5   | 1         |      |  | 2.08  | 0.3   |      | Expressed protein                                  |
| Pc_TC143517 | 2.44  | 0     | Up   |  | 0     | 0.02      |      | 2     | 0.12      |      |  | 0.4   | 0.77  |      | P450 reductase 1                                   |
| Pc_TC143527 | 0.23  | 0.83  |      |  | 0.3   | 0.79      |      | -4.25 | 0.02      | Down |  | -1.22 | 0.27  |      | Expressed protein                                  |
| Pc_TC143531 | -0.11 | 0.99  |      |  | 2.1   | 0.02      | Up   | 0     | 0.01      |      |  | -1.57 | 0.25  |      | Uncharacterized protein                            |
| Pc_TC143540 | -0.82 | 0.33  |      |  | 0.46  | 0.6       |      | -1.92 | 0.15      |      |  | -2.1  | 0.04  | Down | Dihydrolipoamide succinyltransferase               |
| Pc_TC143547 | -2.28 | 0.03  | Down |  | -1.94 | 0.08      |      | -0.31 | 0.82      |      |  | -1.37 | 0.18  |      | Expressed protein                                  |
| Pc_TC143556 | 4.03  | 0     | Up   |  | 0     | 0.67      |      | 2.31  | 0.3       |      |  | 1.21  | 0.69  |      | Expressed protein                                  |
| Pc_TC143559 | -0.81 | 0.32  |      |  | -0.3  | 0.75      |      | -2.97 | 0.03      | Down |  | -2.21 | 0.03  | Down | Expressed protein                                  |
| Pc_TC143575 | 2.66  | 0.03  | Up   |  | 0     | 0.36      |      | 0.96  | 0.69      |      |  | -1.37 | 0.66  |      | Expressed protein                                  |
| Pc_TC143603 | 0.22  | 0.95  |      |  | -0.46 | 0.84      |      | 3.1   | 0.02      | Up   |  | 2.26  | 0.03  | Up   | Expressed protein                                  |
| Pc_TC143616 | -1.3  | 0.01  | Down |  | -0.52 | 0.36      |      | 0.67  | 0.47      |      |  | 0.11  | 0.86  |      | Plant protein of unknown function (DUF863)         |
| Pc_TC143636 | 0.83  | 0.29  |      |  | 1.73  | 0.03      | Up   | -1.5  | 0.28      |      |  | -0.67 | 0.51  |      | unknown protein                                    |
| Pc_TC143664 | 0.08  | 0.93  |      |  | 0.56  | 0.47      |      | -2.54 | 0.05      | Down |  | -0.98 | 0.25  |      | Expressed protein                                  |
| Pc_TC143667 | -0.13 | 0.81  |      |  | 0.58  | 0.35      |      | -2.62 | 0.02      | Down |  | -1.04 | 0.13  |      | cysteine-rich RLK (RECEPTOR-like protein kinase) 8 |
| Pc_TC143674 | 0.07  | 0.87  |      |  | 0.74  | 0.16      |      | -4.68 | 5.72E-005 | Down |  | -2.78 | ##### | Down | Uncharacterized protein                            |
| Pc_TC143693 | -0.79 | 0.32  |      |  | -1.97 | 0.05      | Down | 0.58  | 0.62      |      |  | -0.97 | 0.28  |      | Expressed protein                                  |
| Pc_TC143709 | 0.93  | 0.44  |      |  | 0.54  | 0.73      |      | 1.14  | 0.46      |      |  | 2.8   | 0     | Up   | Expressed protein                                  |
| Pc_TC143719 | 0.03  | 1     |      |  | 0.15  | 0.91      |      | -4.4  | 0.01      | Down |  | -2.28 | 0.05  | Down | Expressed protein                                  |
| Pc_TC143721 | -3.24 | 0.03  | Down |  | -2.26 | 0.12      |      | 0.91  | 0.49      |      |  | 0.39  | 0.73  |      | Expressed protein                                  |
| Pc_TC143726 | 2.58  | 0.01  | Up   |  | 0     | 0.09      |      | 1.09  | 0.49      |      |  | 0.36  | 0.85  |      | RNAse I inhibitor protein 2                        |
| Pc_TC143746 | -2.69 | 0.01  | Down |  | -1.3  | 0.2       |      | 0.64  | 0.6       |      |  | -1.48 | 0.13  |      | Expressed protein                                  |
| Pc_TC143747 | 0.56  | 0.82  |      |  | 3.02  | 0.01      | Up   | 0     | 0.19      |      |  | -0.7  | 0.83  |      | Expressed protein                                  |
| Pc_TC143765 | 1.29  | 0.1   |      |  | 1.25  | 0.17      |      | -1.68 | 0.26      |      |  | -2.7  | 0.04  | Down | Expressed protein                                  |
| Pc_TC143771 | -0.92 | 0.73  |      |  | -1.53 | 0.58      |      | -0.5  | 0.89      |      |  | 2.68  | 0.02  | Up   | Expressed protein                                  |
| Pc_TC143773 | -3.31 | 0.02  | Down |  | -3.33 | 0.04      | Down | 1.63  | 0.19      |      |  | 0.59  | 0.57  |      | Expressed protein                                  |
| Pc_TC143800 | 0     | 0.22  |      |  | -1.26 | 0.7       |      | 3.09  | 0.04      | Up   |  | 2.26  | 0.08  |      | Expressed protein                                  |
| Pc_TC143806 | 1.08  | 0.57  |      |  | -0.94 | 0.84      |      | 1.96  | 0.27      |      |  | 2.67  | 0.04  | Up   | Expressed protein                                  |
| Pc_TC143812 | 0.59  | 0.56  |      |  | 0.62  | 0.58      |      | -1.94 | 0.23      |      |  | -3.62 | 0.02  | Down | Uncharacterized protein                            |
| Pc_TC143816 | 1.08  | 0.77  |      |  | 1.06  | 0.8       |      | 4.75  | 0         | Up   |  | 2.63  | 0.14  |      | Expressed protein                                  |
| Pc_TC143825 | 1.61  | 0.02  | Up   |  | 2.5   | 0         | Up   | -1.04 | 0.43      |      |  | 0.89  | 0.3   |      | Expressed protein                                  |
| Pc_TC143835 | 0.08  | 1     |      |  | 0.43  | 0.74      |      | -4.58 | 0.03      | Down |  | -2.46 | 0.09  |      | Expressed protein                                  |
| Pc_TC143849 | -2.13 | 0.03  | Down |  | -0.83 | 0.42      |      | -0.31 | 0.82      |      |  | -0.68 | 0.49  |      | Expressed protein                                  |
| Pc_TC143853 | 2.13  | 0.01  | Up   |  | 0     | 0.02      |      | 1.58  | 0.24      |      |  | -0.37 | 0.81  |      | Expressed protein                                  |
| Pc_TC143866 | 2.12  | 0.03  | Up   |  | 0.7   | 0.65      |      | -0.67 | 0.76      |      |  | 0.98  | 0.45  |      | Expressed protein                                  |
| Pc_TC143869 | -2.19 | 0.05  | Down |  | -3.8  | 0.01      | Down | 0.48  | 0.72      |      |  | -1.15 | 0.29  |      | Expressed protein                                  |
| Pc_TC143874 | -1.64 | 0.16  |      |  | -2.88 | 0.05      | Down | -2.02 | 0.19      |      |  | -1.9  | 0.12  |      | Expressed protein                                  |
| Pc_TC143890 | 0.02  | 1     |      |  | -0.18 | 0.9       |      | 2.38  | 0.04      | Up   |  | 1.63  | 0.06  |      | Expressed protein                                  |

|             |       |       |      |       |           |      |       |      |      |       |      |      |                                                                 |
|-------------|-------|-------|------|-------|-----------|------|-------|------|------|-------|------|------|-----------------------------------------------------------------|
| Pc_TCI43894 | 1.08  | 0.22  |      | 1.09  | 0.27      |      | -3.82 | 0.04 | Down | -3.11 | 0.03 | Down | Expressed protein                                               |
| Pc_TCI43898 | 1.42  | 0.07  |      | 2.32  | 0.01      | Up   | -2.5  | 0.11 |      | 0.8   | 0.41 |      | Expressed protein                                               |
| Pc_TCI43905 | -3.11 | 0     | Down | 0.76  | 0.3       |      | -1.64 | 0.17 |      | -2.27 | 0.01 | Down | Retrovirus-related Pol polyprotein LINE-1                       |
| Pc_TCI43931 | 3.66  | 0     | Up   | 0     | 0.48      |      | 1.83  | 0.38 |      | 1.85  | 0.29 |      | Putative transposon protein                                     |
| Pc_TCI43939 | -3.92 | 0.03  | Down | -0.62 | 0.67      |      | -1.33 | 0.42 |      | -0.2  | 0.91 |      | Expressed protein                                               |
| Pc_TCI43950 | -0.31 | 0.71  |      | -1.53 | 0.12      |      | 2.53  | 0.02 | Up   | 1.35  | 0.08 |      | hAT dimerisation domain-containing protein                      |
| Pc_TCI43953 | -0.34 | 0.61  |      | 0.39  | 0.59      |      | 1.98  | 0.05 |      | 1.58  | 0.02 | Up   | hAT dimerisation domain-containing protein                      |
| Pc_TCI43970 | 1.9   | 0.04  | Up   | 0     | 0.05      |      | 1.33  | 0.36 |      | -1.51 | 0.35 |      | Expressed protein                                               |
| Pc_TCI43984 | 1.14  | 0.02  | Up   | 0     | 1.73E-011 |      | 0.38  | 0.71 |      | -1.62 | 0.03 | Down | Os03g0243900 protein                                            |
| Pc_TCI43992 | -0.52 | 0.46  |      | -0.17 | 0.84      |      | -0.96 | 0.4  |      | -1.8  | 0.04 | Down | Expressed protein                                               |
| Pc_TCI43996 | -3.24 | 0.03  | Down | -0.18 | 0.93      |      | -1.5  | 0.34 |      | -1.89 | 0.14 |      | Uncharacterized protein                                         |
| Pc_TCI44022 | -1.45 | 0.01  | Down | -4.42 | 2.33E-008 | Down | -1.84 | 0.08 |      | -2.7  | 0    | Down | Expressed protein                                               |
| Pc_TCI44054 | -0.63 | 0.61  |      | 1.25  | 0.21      |      | -4.67 | 0.03 | Down | -2.54 | 0.08 |      | Expressed protein                                               |
| Pc_TCI44056 | -3.83 | 0.04  | Down | 0.74  | 0.53      |      | -2.4  | 0.19 |      | -2.28 | 0.13 |      | calreticulin 1b                                                 |
| Pc_TCI44077 | 2.08  | 0.01  | Up   | 0     | 0.01      |      | 1.39  | 0.27 |      | 0.06  | 1    |      | RS-containing zinc finger protein 21                            |
| Pc_TCI44089 | 0.67  | 0.11  |      | 0.71  | 0.17      |      | -2.28 | 0.03 | Down | -1.12 | 0.07 |      | Expressed protein                                               |
| Pc_TCI44091 | -2.38 | 0.03  | Down | -3.99 | 0.01      | Down | -3.54 | 0.03 | Down | -2.83 | 0.02 | Down | NADH dehydrogenase 1A                                           |
| Pc_TCI44092 | 2.28  | 0     | Up   | 0     | 0         |      | 1.89  | 0.1  |      | 0.85  | 0.35 |      | Expressed protein                                               |
| Pc_TCI44108 | -0.2  | 0.79  |      | 0.4   | 0.61      |      | -3.73 | 0.01 | Down | -0.9  | 0.28 |      | Expressed protein                                               |
| Pc_TCI44110 | -0.58 | 0.63  |      | -0.73 | 0.58      |      | -3.74 | 0.05 | Down | -2.62 | 0.06 |      | Expressed protein                                               |
| Pc_TCI44136 | 0.6   | 0.24  |      | 0.87  | 0.15      |      | -3.06 | 0.01 | Down | -0.97 | 0.16 |      | Expressed protein                                               |
| Pc_TCI44139 | 1.95  | 0     | Up   | 0     | 6.03E-006 |      | 1.47  | 0.17 |      | -0.57 | 0.5  |      | Expressed protein                                               |
| Pc_TCI44148 | 3.59  | ##### | Up   | -1.94 | 0.4       |      | 1.86  | 0.21 |      | 0.63  | 0.69 |      | 26S proteasome regulatory subunit,putative (RPN5)               |
| Pc_TCI44158 | -1.92 | 0.17  |      | -0.48 | 0.75      |      | -2.17 | 0.21 |      | -4.37 | 0.02 | Down | Expressed protein                                               |
| Pc_TCI44159 | 1.74  | 0.02  | Up   | 1.03  | 0.29      |      | 0.23  | 0.89 |      | 0.53  | 0.61 |      | Expressed protein                                               |
| Pc_TCI44188 | -0.51 | 0.82  |      | 1.64  | 0.17      |      | 1.95  | 0.17 |      | 2.26  | 0.03 | Up   | Expressed protein                                               |
| Pc_TCI44191 | 0.68  | 0.29  |      | 1.81  | 0.01      | Up   | -5.12 | 0    | Down | -1.41 | 0.1  |      | Expressed protein                                               |
| Pc_TCI44199 | -3.01 | ##### | Down | -2.52 | 0         | Down | -2.25 | 0.03 | Down | -0.49 | 0.43 |      | Expressed protein                                               |
| Pc_TCI44203 | -0.04 | 0.99  |      | -2.18 | 0.02      | Down | 1.74  | 0.11 |      | 1.12  | 0.13 |      | leucine-rich repeat transmembrane protein kinase family protein |
| Pc_TCI44210 | 0.75  | 0.34  |      | -0.62 | 0.57      |      | 2.81  | 0.01 | Up   | 1.41  | 0.09 |      | Expressed protein                                               |
| Pc_TCI44215 | -0.54 | 0.51  |      | -2.56 | 0.02      | Down | 1.83  | 0.1  |      | 1.26  | 0.11 |      | H0321H01.8 protein                                              |
| Pc_TCI44218 | 0.46  | 0.77  |      | 0.54  | 0.73      |      | 2.66  | 0.05 | Up   | 1.7   | 0.12 |      | Expressed protein                                               |
| Pc_TCI44224 | 0.35  | 0.75  |      | 1.33  | 0.17      |      | -4.74 | 0.03 | Down | -2.04 | 0.13 |      | Expressed protein                                               |
| Pc_TCI44246 | 0.66  | 0.39  |      | 0.44  | 0.64      |      | -3.67 | 0.02 | Down | -2.37 | 0.03 | Down | Expressed protein                                               |
| Pc_TCI44249 | 4.54  | 0.01  | Up   | 0     | 1         |      | 4.79  | 0.02 | Up   | 2.21  | 0.47 |      | Expressed protein                                               |
| Pc_TCI44253 | 2.4   | 0.04  | Up   | 2.32  | 0.08      |      | 0.35  | 0.95 |      | 2.39  | 0.06 |      | Expressed protein                                               |
| Pc_TCI44262 | 0.78  | 0.4   |      | 2.95  | 0         | Up   | -0.29 | 0.87 |      | -0.45 | 0.73 |      | Expressed protein                                               |
| Pc_TCI44270 | 2.19  | 0     | Up   | -5.15 | 0         | Down | 2     | 0.08 |      | 1.09  | 0.19 |      | ATP synthase alpha/beta family protein                          |
| Pc_TCI44276 | 2.25  | 0.24  |      | 3.31  | 0.04      | Up   | 2.2   | 0.34 |      | 2.08  | 0.3  |      | Expressed protein                                               |
| Pc_TCI44281 | -2.92 | 0.07  |      | -3.94 | 0.05      | Down | 0.79  | 0.58 |      | -0.57 | 0.68 |      | Expressed protein                                               |
| Pc_TCI44297 | -0.92 | 0.48  |      | 0.23  | 0.9       |      | -1.17 | 0.48 |      | -3.37 | 0.04 | Down | Expressed protein                                               |
| Pc_TCI44314 | -0.21 | 0.82  |      | 0.77  | 0.36      |      | -3.63 | 0.02 | Down | -0.88 | 0.35 |      | EREB-like protein                                               |
| Pc_TCI44320 | -1.14 | 0.61  |      | 2.46  | 0.03      | Up   | 0     | 0.11 |      | -1.18 | 0.57 |      | Expressed protein                                               |
| Pc_TCI44322 | 1.08  | 0.47  |      | -0.2  | 1         |      | 2.94  | 0.04 | Up   | 2.08  | 0.09 |      | wall associated kinase 5                                        |
| Pc_TCI44326 | 0.52  | 0.47  |      | 0.74  | 0.37      |      | 0     | 0    |      | -2.56 | 0.01 | Down | Expressed protein                                               |
| Pc_TCI44333 | 2.4   | 0.4   |      | 3.06  | 0.22      |      | 1.83  | 0.66 |      | 4.27  | 0.02 | Up   | Expressed protein                                               |
| Pc_TCI44345 | -2.55 | 0.02  | Down | -1.57 | 0.17      |      | -0.28 | 0.85 |      | -0.52 | 0.62 |      | Expressed protein                                               |
| Pc_TCI44371 | 1.74  | 0     | Up   | 0     | 5.26E-008 |      | 1.41  | 0.18 |      | -0.35 | 0.65 |      | Expressed protein                                               |
| Pc_TCI44372 | 2.66  | ##### | Up   | 0     | 9.24E-009 |      | 2.57  | 0.01 | Up   | 0.26  | 0.72 |      | ferretin 1                                                      |
| Pc_TCI44381 | 1.08  | 0.25  |      | 2.57  | 0         | Up   | 2.06  | 0.1  |      | 1.87  | 0.05 | Up   | Putative uncharacterized protein                                |
| Pc_TCI44394 | -0.92 | 0.46  |      | -0.94 | 0.49      |      | 0     | 0.01 |      | -3.54 | 0.03 | Down | Expressed protein                                               |
| Pc_TCI44397 | 3.32  | 0     | Up   | 0     | 0.15      |      | 2.19  | 0.14 |      | -0.18 | 1    |      | 26S proteasome regulatory subunit S2 1A                         |
| Pc_TCI44404 | 2.12  | 0.04  | Up   | 0     | 0.11      |      | 1.46  | 0.35 |      | 0.08  | 1    |      | Expressed protein                                               |
| Pc_TCI44407 | 0.11  | 0.92  |      | 0.87  | 0.31      |      | -2.82 | 0.05 | Down | -2.7  | 0.01 | Down | Expressed protein                                               |
| Pc_TCI44415 | -1.51 | 0.54  |      | 0.06  | 1         |      | 2.94  | 0.04 | Up   | 3.06  | 0.01 | Up   | Expressed protein                                               |
| Pc_TCI44418 | -0.18 | 0.85  |      | -0.25 | 0.81      |      | -1.03 | 0.42 |      | -2.77 | 0.01 | Down | Expressed protein                                               |
| Pc_TCI44436 | -1.36 | 0.06  |      | -2.77 | 0         | Down | -1.56 | 0.18 |      | -1.12 | 0.16 |      | shaggy-related kinase 11                                        |
| Pc_TCI44443 | 1.16  | 0.04  | Up   | -0.38 | 0.62      |      | 1.56  | 0.13 |      | -0.08 | 0.92 |      | Uncharacterized protein                                         |
| Pc_TCI44467 | -0.2  | 0.89  |      | -0.88 | 0.47      |      | -0.93 | 0.53 |      | -2.9  | 0.03 | Down | Expressed protein                                               |
| Pc_TCI44497 | -0.07 | 0.98  |      | 1.71  | 0.04      | Up   | -1.16 | 0.4  |      | -1.03 | 0.33 |      | Expressed protein                                               |
| Pc_TCI44506 | -1.48 | 0     | Down | -0.69 | 0.23      |      | 1.2   | 0.19 |      | 0.6   | 0.31 |      | RNA binding;RNA binding                                         |
| Pc_TCI44520 | 1.82  | 0.03  | Up   | 0.97  | 0.36      |      | 0.27  | 0.88 |      | 0.63  | 0.57 |      | Expressed protein                                               |

|             |       |       |      |       |           |      |  |       |           |      |       |      |      |                                           |
|-------------|-------|-------|------|-------|-----------|------|--|-------|-----------|------|-------|------|------|-------------------------------------------|
| Pc_TC144529 | 1.17  | 0.04  | Up   | 0.89  | 0.21      |      |  | -0.5  | 0.66      |      | -0.01 | 1    |      | Expressed protein                         |
| Pc_TC144537 | 1.08  | 0.01  | Up   | 0.98  | 0.05      |      |  | -3.8  | 0         | Down | -0.94 | 0.12 |      | Expressed protein                         |
| Pc_TC144554 | 0     | 0.99  |      | 0.23  | 0.58      |      |  | -2.16 | 0.01      | Down | -1.53 | 0    | Down | Expressed protein                         |
| Pc_TC144565 | 1.26  | 0.02  | Up   | 0     | 9.24E-009 |      |  | 1.33  | 0.2       |      | 0.96  | 0.16 |      | Expressed protein                         |
| Pc_TC144566 | -0.11 | 0.96  |      | 0     | 1         |      |  | -2.76 | 0.09      |      | -3.96 | 0.01 | Down | Expressed protein                         |
| Pc_TC144567 | 2.59  | 0     | Up   | 0     | 0.07      |      |  | 0.09  | 1         |      | -0.7  | 0.69 |      | Expressed protein                         |
| Pc_TC144613 | 0.52  | 0.47  |      | -0.3  | 0.75      |      |  | 2.1   | 0.06      |      | 1.65  | 0.03 | Up   | Expressed protein                         |
| Pc_TC144615 | 0.39  | 0.45  |      | -0.17 | 0.8       |      |  | 2.63  | 0.01      | Up   | 0.92  | 0.15 |      | Expressed protein                         |
| Pc_TC144643 | -0.41 | 0.65  |      | -2.38 | 0.04      | Down |  | 0.48  | 0.7       |      | 0.13  | 0.91 |      | Expressed protein                         |
| Pc_TC144666 | -2.73 | 0.01  | Down | -1.75 | 0.12      |      |  | -3.63 | 0.02      | Down | -2.18 | 0.05 | Down | ADP/ATP carrier 1                         |
| Pc_TC144703 | 1.11  | 0.19  |      | 2.02  | 0.02      | Up   |  | -3.89 | 0.04      | Down | -1.07 | 0.37 |      | Expressed protein                         |
| Pc_TC144720 | -0.53 | 0.58  |      | 0.55  | 0.56      |      |  | -5.5  | 0         | Down | 0     | 0    |      | Expressed protein                         |
| Pc_TC144764 | -0.48 | 0.66  |      | -0.26 | 0.84      |      |  | -3.56 | 0.04      | Down | -3.02 | 0.02 | Down | Expressed protein                         |
| Pc_TC144782 | -0.89 | 0.11  |      | -1.45 | 0.03      | Down |  | 1.91  | 0.05      | Up   | 0.59  | 0.36 |      | Expressed protein                         |
| Pc_TC144785 | 2.83  | 0.02  | Up   | 2.7   | 0.05      | Up   |  | 2.71  | 0.1       |      | 1.33  | 0.44 |      | Expressed protein                         |
| Pc_TC144788 | 2.04  | 0.04  | Up   | 1.35  | 0.28      |      |  | 0.42  | 0.85      |      | -0.37 | 0.87 |      | Expressed protein                         |
| Pc_TC144792 | 1.46  | 0.32  |      | 0.91  | 0.65      |      |  | 3.23  | 0.03      | Up   | 2     | 0.13 |      | Expressed protein                         |
| Pc_TC144827 | 3.07  | ##### | Up   | 0     | 0         |      |  | 2.76  | 0.01      | Up   | -0.16 | 0.88 |      | Expressed protein                         |
| Pc_TC144843 | 0.88  | 0.07  |      | 0.88  | 0.14      |      |  | -3.74 | 0         | Down | -0.57 | 0.39 |      | Expressed protein                         |
| Pc_TC144857 | 2.47  | 0.01  | Up   | 0     | 0.11      |      |  | 2.06  | 0.16      |      | 0.21  | 0.97 |      | alpha/beta-Hydrolases superfamily protein |
| Pc_TC144862 | -0.44 | 0.66  |      | 0.15  | 0.91      |      |  | -3.82 | 0.02      | Down | -3.28 | 0.01 | Down | Expressed protein                         |
| Pc_TC144898 | 0.15  | 0.93  |      | -0.19 | 0.92      |      |  | 3.25  | 0.01      | Up   | 2.2   | 0.01 | Up   | Expressed protein                         |
| Pc_TC144912 | 0.49  | 0.31  |      | 1     | 0.08      |      |  | -2.34 | 0.03      | Down | -1.37 | 0.05 | Down | Uncharacterized protein                   |
| Pc_TC144914 | -0.16 | 0.88  |      | -0.05 | 0.98      |      |  | 2.93  | 0.01      | Up   | 0.99  | 0.23 |      | [Protein-PII] uridylyltransferase         |
| Pc_TC144926 | 3.33  | ##### | Up   | 0     | 0.01      |      |  | 2.15  | 0.08      |      | 0.3   | 0.8  |      | small ubiquitin-like modifier 2           |
| Pc_TC144936 | 1.08  | 0.27  |      | 2.28  | 0.01      | Up   |  | -1.4  | 0.41      |      | -0.28 | 0.87 |      | Expressed protein                         |
| Pc_TC144985 | 1.52  | 0.02  | Up   | 1.08  | 0.16      |      |  | -1.04 | 0.4       |      | -0.54 | 0.54 |      | K+ efflux antiporter 5                    |
| Pc_TC144994 | -1.53 | 0.06  |      | -1.99 | 0.04      | Down |  | 1.05  | 0.35      |      | 0.21  | 0.81 |      | Expressed protein                         |
| Pc_TC145030 | 2.37  | 0.01  | Up   | 0     | 0.09      |      |  | 2.42  | 0.08      |      | -0.09 | 1    |      | Expressed protein                         |
| Pc_TC145036 | -2.46 | 0.03  | Down | -2.48 | 0.05      |      |  | 0.04  | 1         |      | -0.43 | 0.69 |      | Expressed protein                         |
| Pc_TC145071 | -4.57 | 0     | Down | -2.59 | 0.06      |      |  | -5.14 | 0.01      | Down | 0     | 0    |      | Expressed protein                         |
| Pc_TC145092 | -0.34 | 0.57  |      | -2.05 | 0.01      | Down |  | -0.22 | 0.84      |      | -0.23 | 0.75 |      | Expressed protein                         |
| Pc_TC145098 | 0.87  | 0.2   |      | 2.11  | 0         | Up   |  | -0.34 | 0.79      |      | -0.19 | 0.84 |      | Expressed protein                         |
| Pc_TC145107 | -0.84 | 0.51  |      | 0.14  | 0.96      |      |  | -3.58 | 0.07      |      | -4.46 | 0.01 | Down | Expressed protein                         |
| Pc_TC145114 | 2.44  | 0     | Up   | 0     | 0.03      |      |  | 1.71  | 0.2       |      | 0.01  | 1    |      | Expressed protein                         |
| Pc_TC145122 | -1.92 | 0.1   |      | -0.53 | 0.67      |      |  | -4.08 | 0.03      | Down | -0.96 | 0.4  |      | Expressed protein                         |
| Pc_TC145124 | -1.66 | 0.18  |      | -3.26 | 0.05      | Down |  | 0.67  | 0.63      |      | -0.79 | 0.51 |      | Expressed protein                         |
| Pc_TC145131 | 0.31  | 0.66  |      | 0.45  | 0.56      |      |  | 0     | 4.80E-005 |      | -3.04 | 0    | Down | Expressed protein                         |
| Pc_TC145141 | 0.14  | 0.93  |      | -3.53 | 0.02      | Down |  | 1.13  | 0.37      |      | 0.5   | 0.63 |      | Uncharacterized protein                   |
| Pc_TC145176 | 2.14  | 0.02  | Up   | 0     | 0.04      |      |  | 2.73  | 0.03      | Up   | 1.87  | 0.07 |      | Expressed protein                         |
| Pc_TC145203 | 2.29  | 0     | Up   | 0     | 0.02      |      |  | 1.36  | 0.3       |      | 0.27  | 0.85 |      | ubiquitin E2 variant 1D-4                 |
| Pc_TC145305 | -0.65 | 0.31  |      | 0.33  | 0.64      |      |  | -2.64 | 0.03      | Down | -2.74 | 0    | Down | DNase I-like superfamily protein          |
| Pc_TC145322 | 0.44  | 0.73  |      | -1.43 | 0.37      |      |  | 1.6   | 0.23      |      | 1.93  | 0.05 | Up   | Peroxidase superfamily protein            |
| Pc_TC145347 | -0.1  | 0.99  |      | 0.22  | 0.9       |      |  | -4.58 | 0.03      | Down | -1.46 | 0.27 |      | Expressed protein                         |
| Pc_TC145364 | -0.61 | 0.43  |      | -4.8  | 0         | Down |  | 0.61  | 0.59      |      | -0.02 | 1    |      | Expressed protein                         |
| Pc_TC145393 | -1.34 | 0.5   |      | -0.13 | 1         |      |  | 2.73  | 0.05      | Up   | 1.15  | 0.38 |      | Expressed protein                         |
| Pc_TC145413 | -3.83 | 0.04  | Down | -1.85 | 0.24      |      |  | -1.6  | 0.35      |      | -1.7  | 0.23 |      | Expressed protein                         |
| Pc_TC145425 | -0.92 | 0.73  |      | 0.64  | 0.76      |      |  | 1.62  | 0.33      |      | 2.4   | 0.04 | Up   | Expressed protein                         |
| Pc_TC145439 | 2.66  | 0     | Up   | 0     | 0.05      |      |  | 1.4   | 0.33      |      | 0.25  | 0.9  |      | DDRKG domain                              |
| Pc_TC145444 | -0.3  | 0.79  |      | -0.94 | 0.42      |      |  | -3.61 | 0.03      | Down | -2.08 | 0.08 |      | Expressed protein                         |
| Pc_TC145452 | 2.99  | 0.06  |      | 3.38  | 0.04      | Up   |  | 1.5   | 0.6       |      | 2.53  | 0.16 |      | Expressed protein                         |
| Pc_TC145479 | 2.4   | 0.06  |      | 1.87  | 0.24      |      |  | 3.65  | 0.02      | Up   | 2.02  | 0.17 |      | Expressed protein                         |
| Pc_TC145481 | 0.28  | 0.86  |      | 0.26  | 0.89      |      |  | 2.95  | 0.02      | Up   | 1.48  | 0.16 |      | H0209H04.5 protein                        |
| Pc_TC145496 | 2.3   | 0.04  | Up   | 0     | 0.2       |      |  | 1.31  | 0.45      |      | 0.36  | 0.91 |      | Expressed protein                         |
| Pc_TC145505 | -3.73 | 0.05  | Down | -2.75 | 0.13      |      |  | -1.3  | 0.45      |      | -2.18 | 0.15 |      | Expressed protein                         |
| Pc_TC145509 | 0.76  | 0.71  |      | -0.26 | 1         |      |  | 3.09  | 0.04      | Up   | 1.63  | 0.26 |      | Expressed protein                         |
| Pc_TC145515 | 0.57  | 0.45  |      | 1.92  | 0.01      | Up   |  | -1.08 | 0.4       |      | -1.96 | 0.05 |      | ribosomal protein L18                     |
| Pc_TC145517 | -0.71 | 0.56  |      | 0.2   | 0.9       |      |  | -3.74 | 0.05      | Down | -1.62 | 0.21 |      | domains rearranged methyltransferase 2    |
| Pc_TC145522 | -0.62 | 0.41  |      | -1.96 | 0.04      | Down |  | 0.31  | 0.79      |      | 0.9   | 0.24 |      | 5'-3' exonuclease family protein          |
| Pc_TC145535 | -2.22 | 0     | Down | -0.92 | 0.23      |      |  | -1.74 | 0.13      |      | -1.23 | 0.11 |      | Expressed protein                         |
| Pc_TC145539 | 0.59  | 0.42  |      | 1.94  | 0.01      | Up   |  | -3.05 | 0.03      | Down | -2.93 | 0.01 | Down | Uncharacterized protein                   |
| Pc_TC145561 | 0.62  | 0.63  |      | 2.06  | 0.05      | Up   |  | 0     | 0.04      |      | 0.69  | 0.6  |      | S-adenosylmethionine synthetase 2         |

|             |       |       |      |       |           |      |       |           |      |       |       |      |                                                    |
|-------------|-------|-------|------|-------|-----------|------|-------|-----------|------|-------|-------|------|----------------------------------------------------|
| Pc_TC145597 | 1.08  | 0.17  |      | 1.33  | 0.13      |      | -1.44 | 0.31      |      | -2.81 | 0.03  | Down | Expressed protein                                  |
| Pc_TC145599 | -2.24 | 0.03  | Down | -0.9  | 0.39      |      | 0.13  | 0.94      |      | -1.11 | 0.27  |      | Pentatricopeptide repeat (PPR) superfamily protein |
| Pc_TC145607 | -2.57 | 0.04  | Down | -1.59 | 0.2       |      | 1.34  | 0.28      |      | 0.44  | 0.67  |      | Expressed protein                                  |
| Pc_TC145611 | 2.95  | 0     | Up   | 0     | 0.09      |      | 0.73  | 0.68      |      | -0.22 | 0.96  |      | heat shock protein 60                              |
| Pc_TC145648 | 2.19  | 0     | Up   | 1.15  | 0.19      |      | 2.36  | 0.04      | Up   | 2.37  | 0     | Up   | Expressed protein                                  |
| Pc_TC145650 | 2.9   | ##### | Up   | 0     | 0         |      | 2.4   | 0.04      | Up   | 0.25  | 0.84  |      | glutamine synthase clone R1                        |
| Pc_TC145662 | -0.86 | 0.43  |      | -0.38 | 0.77      |      | -4.02 | 0.03      | Down | -0.99 | 0.39  |      | Expressed protein                                  |
| Pc_TC145672 | 0.33  | 0.67  |      | 0.63  | 0.45      |      | -3.24 | 0.02      | Down | -0.84 | 0.36  |      | Expressed protein                                  |
| Pc_TC145728 | 1.57  | 0     | Up   | 0     | 9.63E-012 |      | 1.5   | 0.12      |      | -0.51 | 0.46  |      | S-adenosyl-L-homocysteine hydrolase                |
| Pc_TC145733 | 3.5   | 0     | Up   | 0     | 0.36      |      | 2.15  | 0.22      |      | 0.63  | 0.82  |      | Expressed protein                                  |
| Pc_TC145734 | 1.66  | 0.36  |      | 0.8   | 0.82      |      | 3.9   | 0.01      | Up   | 2.29  | 0.15  |      | Expressed protein                                  |
| Pc_TC145735 | -0.92 | 0.43  |      | -0.56 | 0.67      |      | -3.82 | 0.04      | Down | 0     | 0     |      | Expressed protein                                  |
| Pc_TC145760 | 2.49  | 0     | Up   | 0     | 0.03      |      | 1.39  | 0.32      |      | 0.78  | 0.51  |      | Expressed protein                                  |
| Pc_TC145763 | 0.4   | 0.66  |      | 1.55  | 0.07      |      | 2.5   | 0.03      | Up   | 0.84  | 0.36  |      | Expressed protein                                  |
| Pc_TC145764 | -0.92 | 0.55  |      | 2.5   | 0.01      | Up   | -3.08 | 0.14      |      | 0     | 0.02  |      | Uncharacterized protein                            |
| Pc_TC145767 | -1.51 | 0.54  |      | 0     | 0.2       |      | 2.9   | 0.05      | Up   | 1.56  | 0.25  |      | Expressed protein                                  |
| Pc_TC145768 | 0     | 0.31  |      | 0.38  | 0.97      |      | 4.1   | 0.01      | Up   | 2.63  | 0.05  | Up   | Expressed protein                                  |
| Pc_TC145772 | 0.44  | 0.32  |      | 0.69  | 0.2       |      | -3.3  | 0         | Down | -1.52 | 0.02  | Down | Expressed protein                                  |
| Pc_TC145782 | 3.02  | 0     | Up   | 0     | 0.2       |      | 3.2   | 0.02      | Up   | 1.5   | 0.27  |      | Uncharacterized protein                            |
| Pc_TC145810 | 1.4   | 0.23  |      | 2.27  | 0.04      | Up   | -0.5  | 0.85      |      | 0.21  | 0.97  |      | Expressed protein                                  |
| Pc_TC145811 | -0.64 | 0.49  |      | -2.99 | 0.02      | Down | 1.38  | 0.24      |      | 0.41  | 0.66  |      | Expressed protein                                  |
| Pc_TC145814 | -3.17 | 0.04  | Down | -1.02 | 0.45      |      | 0.84  | 0.54      |      | 0.13  | 0.95  |      | Cheerio, isoform G                                 |
| Pc_TC145825 | 1.4   | 0.3   |      | 2.52  | 0.04      | Up   | 2.62  | 0.08      |      | 2.87  | 0.01  | Up   | Expressed protein                                  |
| Pc_TC145829 | -0.12 | 0.86  |      | -1.55 | 0.05      |      | 2.06  | 0.04      | Up   | 1     | 0.15  |      | Expressed protein                                  |
| Pc_TC145837 | -1.42 | 0.28  |      | -0.44 | 0.77      |      | 2.43  | 0.05      | Up   | 1.42  | 0.14  |      | Expressed protein                                  |
| Pc_TC145855 | 2.12  | 0.03  | Up   | 1.7   | 0.15      |      | 1.83  | 0.21      |      | 2.16  | 0.04  | Up   | Expressed protein                                  |
| Pc_TC145887 | -0.82 | 0.16  |      | -1.57 | 0.03      | Down | 0.32  | 0.76      |      | -0.03 | 0.97  |      | Expressed protein                                  |
| Pc_TC145930 | 1.95  | 0.02  | Up   | 0     | 0.01      |      | 2.1   | 0.09      |      | -0.22 | 0.89  |      | Expressed protein                                  |
| Pc_TC145940 | 3.98  | ##### | Up   | 0     | 4.13E-006 |      | 3.23  | 0         | Up   | 1.18  | 0.11  |      | Expressed protein                                  |
| Pc_TC145972 | 0.35  | 0.73  |      | -0.2  | 0.89      |      | -4.08 | 0.03      | Down | -0.57 | 0.62  |      | Expressed protein                                  |
| Pc_TC145981 | 0.79  | 0.07  |      | -0.02 | 0.97      |      | -4.22 | 0         | Down | -1.06 | 0.1   |      | Expressed protein                                  |
| Pc_TC145990 | 2.89  | 0.02  | Up   | 0     | 0.36      |      | 2.96  | 0.06      |      | -0.37 | 0.99  |      | Uncharacterized protein                            |
| Pc_TC146004 | 0.08  | 0.99  |      | 1.06  | 0.28      |      | -2.08 | 0.19      |      | -2.77 | 0.04  | Down | Putative polyprotein                               |
| Pc_TC146015 | 0.49  | 0.43  |      | 0.14  | 0.86      |      | -4.51 | 0         | Down | -1.85 | 0.03  | Down | Expressed protein                                  |
| Pc_TC146030 | 0.33  | 0.66  |      | 1.1   | 0.16      |      | -1.9  | 0.14      |      | -1.93 | 0.04  | Down | Expressed protein                                  |
| Pc_TC146033 | 2.18  | 0     | Up   | 0     | 0         |      | 1.07  | 0.4       |      | -0.51 | 0.67  |      | Expressed protein                                  |
| Pc_TC146037 | -0.14 | 0.94  |      | 1.8   | 0.05      | Up   | 0     | 0.01      |      | -2.77 | 0.04  | Down | Uncharacterized protein                            |
| Pc_TC146045 | 1.24  | 0.12  |      | 0     | 0         |      | 2.32  | 0.05      | Up   | 0.28  | 0.8   |      | Putative uncharacterized protein                   |
| Pc_TC146084 | -0.05 | 0.94  |      | -1.59 | 0.03      | Down | -0.97 | 0.36      |      | -1.57 | 0.04  | Down | Helicase/SANT-associated, DNA binding protein      |
| Pc_TC146087 | -3.59 | ##### | Down | -0.31 | 0.64      |      | -2.21 | 0.04      | Down | -0.19 | 0.78  |      | Helicase/SANT-associated, DNA binding protein      |
| Pc_TC146091 | 0.66  | 0.33  |      | 0.62  | 0.43      |      | -3.11 | 0.02      | Down | -0.55 | 0.52  |      | adrenodoxin oxidoreductase                         |
| Pc_TC146096 | 2.31  | 0.01  | Up   | 0     | 0.07      |      | 1.09  | 0.48      |      | -0.11 | 1     |      | ZIP metal ion transporter family                   |
| Pc_TC146103 | 0     | 0.64  |      | 0.06  | 1         |      | 3.79  | 0.03      | Up   | 2.33  | 0.22  |      | Expressed protein                                  |
| Pc_TC146149 | 0.45  | 0.43  |      | 0.89  | 0.17      |      | -1.36 | 0.21      |      | -1.69 | 0.03  | Down | Expressed protein                                  |
| Pc_TC146174 | -0.13 | 0.73  |      | -0.49 | 0.32      |      | -4.04 | 8.73E-005 | Down | -2.74 | ##### | Down | Expressed protein                                  |
| Pc_TC146175 | -0.92 | 0.83  |      | 2.7   | 0.05      | Up   | 0     | 0.26      |      | -0.37 | 0.99  |      | Expressed protein                                  |
| Pc_TC146210 | 1.82  | 0.14  |      | 2.52  | 0.04      | Up   | -2.08 | 0.43      |      | 0.95  | 0.55  |      | Uncharacterized protein                            |
| Pc_TC146225 | 0.82  | 0.63  |      | 2.68  | 0.02      | Up   | 0     | 0.14      |      | 0     | 0.11  |      | Expressed protein                                  |
| Pc_TC146228 | 1     | 0.28  |      | 1.25  | 0.21      |      | -4.67 | 0.03      | Down | -1.54 | 0.24  |      | Expressed protein                                  |
| Pc_TC146260 | 0.2   | 0.8   |      | 1.91  | 0.01      | Up   | -0.99 | 0.42      |      | -0.63 | 0.47  |      | Expressed protein                                  |
| Pc_TC146270 | 0.7   | 0.29  |      | -0.66 | 0.45      |      | 0.42  | 0.72      |      | -2.61 | 0.01  | Down | Expressed protein                                  |
| Pc_TC146271 | -2.87 | ##### | Down | -1.79 | 0.02      | Down | 1.34  | 0.18      |      | -0.11 | 0.88  |      | Expressed protein                                  |
| Pc_TC146280 | 3.29  | ##### | Up   | 0     | 0.01      |      | 1.6   | 0.21      |      | 0.7   | 0.51  |      | RNA-binding (RRM/RBD/RNP motifs) family protein    |
| Pc_TC146307 | -0.55 | 0.57  |      | 0.01  | 1         |      | 0     | 0         |      | -3.74 | 0     | Down | Expressed protein                                  |
| Pc_TC146331 | 1.14  | 0.29  |      | 2.38  | 0.02      | Up   | -1.63 | 0.4       |      | 0.25  | 0.9   |      | Expressed protein                                  |
| Pc_TC146356 | 2.49  | 0.02  | Up   | 0     | 0.2       |      | 0.09  | 1         |      | -1.37 | 0.55  |      | Uncharacterized protein                            |
| Pc_TC146364 | -3.24 | 0.03  | Down | -3.26 | 0.05      | Down | 0     | 0.01      |      | 0     | 0     |      | Expressed protein                                  |
| Pc_TC146399 | 2.25  | 0.01  | Up   | 0     | 0.02      |      | 1.48  | 0.27      |      | 0.57  | 0.64  |      | Expressed protein                                  |
| Pc_TC146414 | -3.17 | 0     | Down | -2.6  | 0.03      | Down | 2     | 0.08      |      | -0.16 | 0.88  |      | Expressed protein                                  |
| Pc_TC146428 | 1.87  | 0.05  | Up   | 1.41  | 0.22      |      | -0.63 | 0.75      |      | 0.69  | 0.6   |      | DNA/RNA polymerases superfamily protein            |
| Pc_TC146429 | 1.61  | 0.05  | Up   | 0     | 0.01      |      | 1.04  | 0.43      |      | 0.11  | 0.96  |      | Expressed protein                                  |
| Pc_TC146457 | 2.66  | 0.01  | Up   | 0     | 0.2       |      | 1.62  | 0.33      |      | 0.5   | 0.82  |      | mitochondrial lipamide dehydrogenase 1             |

|             |       |       |      |       |           |      |       |           |      |       |       |      |                                                             |
|-------------|-------|-------|------|-------|-----------|------|-------|-----------|------|-------|-------|------|-------------------------------------------------------------|
| Pc_TC146465 | 0.02  | 1     |      | 0.85  | 0.29      |      | -1.61 | 0.2       |      | -2.08 | 0.03  | Down | Expressed protein                                           |
| Pc_TC146466 | -0.57 | 0.61  |      | -0.08 | 0.99      |      | -3.96 | 0.03      | Down | 0     | 0     |      | Expressed protein                                           |
| Pc_TC146479 | -4.17 | 0.02  | Down | -2.6  | 0.09      |      | -0.84 | 0.59      |      | -1.3  | 0.3   |      | putative unclassified                                       |
| Pc_TC146483 | -0.66 | 0.27  |      | -1.56 | 0.04      | Down | 0.63  | 0.54      |      | 0     | 1     |      | Expressed protein                                           |
| Pc_TC146489 | -0.76 | 0.33  |      | -2.37 | 0.02      | Down | -2.47 | 0.06      |      | -1.26 | 0.16  |      | Expressed protein                                           |
| Pc_TC146498 | 0.49  | 0.64  |      | 1.89  | 0.04      | Up   | 0.83  | 0.55      |      | 0.31  | 0.81  |      | Expressed protein                                           |
| Pc_TC146503 | -0.51 | 0.62  |      | 1.26  | 0.16      |      | -5.25 | 0.01      | Down | -2.13 | 0.07  |      | Expressed protein                                           |
| Pc_TC146549 | -0.36 | 0.55  |      | -1.07 | 0.15      |      | 2.44  | 0.01      | Up   | -0.82 | 0.23  |      | Expressed protein                                           |
| Pc_TC146557 | -6.05 | ##### | Down | -5.07 | 5.27E-005 | Down | -4.63 | 0         | Down | -3.92 | 0     | Down | actin-11                                                    |
| Pc_TC146565 | 0.86  | 0.41  |      | 2.66  | 0         | Up   | 0     | 0.02      |      | -4.18 | 0.03  | Down | Expressed protein                                           |
| Pc_TC146566 | 2.49  | 0     | Up   | 0     | 0.04      |      | 0.87  | 0.57      |      | -1.15 | 0.45  |      | Expressed protein                                           |
| Pc_TC146569 | 0.22  | 0.87  |      | 0.49  | 0.67      |      | -2.82 | 0.1       |      | -4.7  | 0.01  | Down | Expressed protein                                           |
| Pc_TC146590 | 3.54  | 0.01  | Up   | 0     | 0.67      |      | 2.67  | 0.2       |      | 0.95  | 0.81  |      | UDP-glucosyl transferase 76D1                               |
| Pc_TC146592 | -2.86 | 0.03  | Down | -1.01 | 0.41      |      | -4.02 | 0.03      | Down | -0.9  | 0.43  |      | Expressed protein                                           |
| Pc_TC146603 | 0.16  | 0.66  |      | 0.34  | 0.44      |      | -5.35 | 6.19E-007 | Down | -2.25 | ##### | Down | Expressed protein                                           |
| Pc_TC146628 | 2.99  | 0.01  | Up   | 0     | 0.36      |      | 3.59  | 0.02      | Up   | 1.53  | 0.35  |      | Expressed protein                                           |
| Pc_TC146631 | 1.63  | 0.07  |      | 2.46  | 0.01      | Up   | -1.98 | 0.27      |      | -0.01 | 1     |      | Expressed protein                                           |
| Pc_TC146632 | -0.59 | 0.42  |      | -2.37 | 0.01      | Down | -1.87 | 0.13      |      | -1.98 | 0.03  | Down | Expressed protein                                           |
| Pc_TC146633 | -1.57 | 0.18  |      | -0.08 | 0.99      |      | -4.96 | 0.02      | Down | -1.66 | 0.17  |      | Expressed protein                                           |
| Pc_TC146697 | -0.14 | 0.94  |      | 0.47  | 0.68      |      | 2.74  | 0.02      | Up   | 2.43  | 0     | Up   | Expressed protein                                           |
| Pc_TC146702 | 0.66  | 0.5   |      | 1.1   | 0.28      |      | 0     | 0.01      |      | -2.96 | 0.05  | Down | Expressed protein                                           |
| Pc_TC146723 | 0.89  | 0.06  |      | 1     | 0.08      |      | -2.21 | 0.04      | Down | -1.32 | 0.06  |      | Expressed protein                                           |
| Pc_TC146731 | -2.95 | 0     | Down | -2.56 | 0.02      | Down | -2.2  | 0.1       |      | -1.9  | 0.05  |      | Uncharacterized protein (Fragment)                          |
| Pc_TC146740 | 0.63  | 0.34  |      | 0.85  | 0.26      |      | -3.04 | 0.02      | Down | -1.37 | 0.12  |      | Putative uncharacterized protein                            |
| Pc_TC146759 | -3.57 | 0.01  | Down | -4.59 | 0.01      | Down | 1.89  | 0.11      |      | 0.54  | 0.59  |      | Expressed protein                                           |
| Pc_TC146760 | 0     | 0.06  |      | -1.53 | 0.46      |      | 2.66  | 0.05      | Up   | -0.74 | 0.69  |      | Uncharacterized protein                                     |
| Pc_TC146767 | 0.01  | 1     |      | 1.49  | 0.06      |      | -2.43 | 0.08      |      | -2.18 | 0.04  | Down | Expressed protein                                           |
| Pc_TC146817 | 0.16  | 0.78  |      | 0.39  | 0.55      |      | -0.13 | 0.91      |      | -2.53 | 0     | Down | Expressed protein                                           |
| Pc_TC146828 | 0.42  | 0.7   |      | -1.19 | 0.38      |      | 4.14  | 0         | Up   | 2.49  | 0     | Up   | Expressed protein                                           |
| Pc_TC146845 | -3.17 | 0.04  | Down | -1.87 | 0.19      |      | 0.01  | 1         |      | -1.16 | 0.35  |      | Expressed protein                                           |
| Pc_TC146856 | -2.35 | 0     | Down | -0.76 | 0.33      |      | 2.69  | 0.01      | Up   | 1.99  | 0     | Up   | Expressed protein                                           |
| Pc_TC146861 | 1.72  | 0.12  |      | 0.64  | 0.71      |      | 3.48  | 0.01      | Up   | 2.89  | 0     | Up   | Expressed protein                                           |
| Pc_TC146867 | 0.02  | 1     |      | 0.64  | 0.52      |      | -2.61 | 0.1       |      | -3.08 | 0.02  | Down | Expressed protein                                           |
| Pc_TC146870 | -0.69 | 0.42  |      | 1.32  | 0.1       |      | -1.15 | 0.37      |      | -3.15 | 0.01  | Down | Mitochondrial substrate carrier family protein              |
| Pc_TC146871 | 0.19  | 0.87  |      | 0.87  | 0.37      |      | -3.08 | 0.06      |      | -3.96 | 0.01  | Down | Expressed protein                                           |
| Pc_TC146882 | -0.13 | 0.9   |      | 0.5   | 0.57      |      | -3.67 | 0.01      | Down | -3.28 | 0     | Down | Uncharacterized protein                                     |
| Pc_TC146889 | 1.08  | 0.31  |      | 0.64  | 0.63      |      | 2.31  | 0.08      |      | 2.17  | 0.03  | Up   | Expressed protein                                           |
| Pc_TC146911 | -1.73 | 0.16  |      | -4.33 | 0.02      | Down | -0.8  | 0.6       |      | -1.07 | 0.37  |      | Expressed protein                                           |
| Pc_TC146917 | 1.77  | 0.09  |      | 0.47  | 0.79      |      | 1.09  | 0.49      |      | 2.21  | 0.04  | Up   | Expressed protein                                           |
| Pc_TC146937 | -0.22 | 0.67  |      | -0.33 | 0.6       |      | 1.82  | 0.05      |      | 1.55  | 0.01  | Up   | F-box and associated interaction domains-containing protein |
| Pc_TC146944 | 1.62  | 0.04  | Up   | 1.45  | 0.12      |      | -0.64 | 0.67      |      | 0.72  | 0.47  |      | Expressed protein                                           |
| Pc_TC146958 | 3.03  | 0.01  | Up   | 0     | 0.36      |      | 2.67  | 0.1       |      | 1.21  | 0.5   |      | ADP-ribosylation factor A1E                                 |
| Pc_TC146965 | 2.25  | 0     | Up   | 0     | 0         |      | 1.93  | 0.1       |      | 1.32  | 0.14  |      | aconitase 1                                                 |
| Pc_TC147007 | -0.1  | 0.87  |      | -2.82 | 0         | Down | 2.14  | 0.03      | Up   | 1.53  | 0.02  | Up   | Leucine-rich repeat protein kinase family protein           |
| Pc_TC147046 | 3.17  | 0.04  | Up   | 4.31  | 0         | Up   | 0     | 0.53      |      | -1.37 | 0.88  |      | Expressed protein                                           |
| Pc_TC147073 | 4.17  | 0.02  | Up   | 0     | 1         |      | 3.67  | 0.12      |      | -0.37 | 1     |      | Expressed protein                                           |
| Pc_TC147093 | 0     | 0     |      | 0     | 0         |      | -2.91 | 0.06      |      | -5.37 | 0     | Down | Expressed protein                                           |
| Pc_TC147111 | -0.34 | 0.93  |      | 1.58  | 0.21      |      | 0.31  | 0.92      |      | 2.38  | 0.03  | Up   | Expressed protein                                           |
| Pc_TC147121 | 3     | ##### | Up   | 0     | 0         |      | 1.63  | 0.19      |      | 0.07  | 0.99  |      | Expressed protein                                           |
| Pc_TC147153 | 2.92  | 0     | Up   | 0     | 0.02      |      | 2.22  | 0.08      |      | 0.91  | 0.42  |      | AMP-dependent synthetase and ligase family protein          |
| Pc_TC147154 | -0.31 | 0.81  |      | 1.99  | 0.02      | Up   | 0.07  | 1         |      | -0.77 | 0.52  |      | Ribosomal protein L36e family protein                       |
| Pc_TC147161 | 1.46  | 0.32  |      | 0.06  | 1         |      | 2.99  | 0.05      | Up   | 1.83  | 0.19  |      | Expressed protein                                           |
| Pc_TC147163 | -3.73 | 0.05  | Down | 0     | 0.02      |      | -1.72 | 0.33      |      | -2.18 | 0.15  |      | Expressed protein                                           |
| Pc_TC147167 | -1.66 | 0.18  |      | -0.46 | 0.74      |      | 2.41  | 0.05      | Up   | 2.07  | 0.02  | Up   | Expressed protein                                           |
| Pc_TC147169 | 1     | 0.39  |      | 2.35  | 0.02      | Up   | -2.82 | 0.2       |      | -0.37 | 0.86  |      | Expressed protein                                           |
| Pc_TC147170 | 4.25  | 0.01  | Up   | 0     | 1         |      | 4.09  | 0.06      |      | 2.8   | 0.26  |      | ARM repeat superfamily protein                              |
| Pc_TC147173 | -2.78 | 0.02  | Down | -0.8  | 0.47      |      | 0.07  | 0.98      |      | 0.05  | 0.99  |      | cysteine-rich RLK (RECEPTOR-like protein kinase) 8          |
| Pc_TC147188 | -0.87 | 0.38  |      | -3.21 | 0.02      | Down | -0.4  | 0.78      |      | -1.77 | 0.11  |      | Expressed protein                                           |
| Pc_TC147194 | 0.18  | 0.88  |      | 1.18  | 0.19      |      | -2.98 | 0.06      |      | -4.18 | 0     | Down | Uncharacterized protein                                     |
| Pc_TC147197 | -3.42 | 0     | Down | -1.22 | 0.26      |      | -1.78 | 0.2       |      | -1.21 | 0.24  |      | Expressed protein                                           |
| Pc_TC147206 | -2.92 | 0.03  | Down | -2.2  | 0.1       |      | -0.17 | 0.92      |      | -2.15 | 0.08  |      | polyubiquitin 3                                             |
| Pc_TC147212 | 0.21  | 0.84  |      | -0.55 | 0.61      |      | 2.78  | 0.01      | Up   | 1.71  | 0.04  | Up   | Expressed protein                                           |

|             |       |       |      |       |           |      |       |      |      |       |       |      |                                                        |     |
|-------------|-------|-------|------|-------|-----------|------|-------|------|------|-------|-------|------|--------------------------------------------------------|-----|
| Pc_TC147221 | 2.76  | 0     | Up   | 0     | 0.01      |      | 1.43  | 0.26 |      | 0.46  | 0.68  |      | Expressed protein                                      |     |
| Pc_TC147225 | -0.47 | 0.68  |      | -0.01 | 1         |      | -4.96 | 0.02 | Down | -1.03 | 0.38  |      | Expressed protein                                      |     |
| Pc_TC147247 | 2.83  | 0.02  | Up   | 0     | 0.36      |      | 3     | 0.06 |      | 1.21  | 0.5   |      | Expressed protein                                      |     |
| Pc_TC147251 | 3.08  | 0.18  |      | 4.06  | 0.04      | Up   | 2.31  | 0.48 |      | 3.95  | 0.04  | Up   | Expressed protein                                      |     |
| Pc_TC147271 | 0.08  | 1     |      | 0.5   | 0.71      |      | 2.93  | 0.02 | Up   | 2.12  | 0.03  | Up   | Expressed protein                                      |     |
| Pc_TC147280 | -1.24 | 0.47  |      | -0.26 | 0.94      |      | 2.69  | 0.04 | Up   | 0.21  | 0.94  |      | Expressed protein                                      |     |
| Pc_TC147307 | -2.86 | 0.03  | Down | -0.66 | 0.59      |      | -0.85 | 0.56 |      | -1.31 | 0.26  |      | Expressed protein                                      |     |
| Pc_TC147308 | 0.34  | 0.96  |      | -0.26 | 1         |      | 3.23  | 0.03 | Up   | 0.3   | 0.97  |      | Expressed protein                                      |     |
| Pc_TC147321 | 0     | ##### |      | -4.4  | 0         | Down | -2.05 | 0.13 |      | -4.25 | 0     | Down | Expressed protein                                      |     |
| Pc_TC147375 | -2.78 | 0.02  | Down | -1.48 | 0.2       |      | -0.65 | 0.64 |      | -1.23 | 0.25  |      | Expressed protein                                      |     |
| Pc_TC147383 | -0.12 | 0.95  |      | -0.01 | 1         |      | -1.85 | 0.23 |      | -3.31 | 0.02  | Down | Putative uncharacterized protein                       |     |
| Pc_TC147384 | -1.28 | 0.26  |      | -1.47 | 0.25      |      | -4.02 | 0.03 | Down | -2.9  | 0.03  | Down | Expressed protein                                      |     |
| Pc_TC147401 | -3.56 | ##### | Down | -1.7  | 0.04      | Down | 0.73  | 0.49 |      | -0.67 | 0.38  |      | Putative harbinger transposase-derived nuclease        |     |
| Pc_TC147402 | -0.68 | 0.39  |      | -0.94 | 0.31      |      | -0.64 | 0.6  |      | -2.32 | 0.02  | Down | Expressed protein                                      |     |
| Pc_TC147430 | -1.46 | 0.04  | Down | -3.43 | 0         | Down | 1.09  | 0.3  |      | 0.26  | 0.73  |      | Expressed protein                                      |     |
| Pc_TC147443 | -2.2  | 0.04  | Down | -0.27 | 0.81      |      | -0.37 | 0.79 |      | 0.09  | 0.95  |      | Expressed protein                                      |     |
| Pc_TC147458 | -3.38 | 0.02  | Down | 0.06  | 1         |      | 0.66  | 0.63 |      | 0.59  | 0.56  |      | Expressed protein                                      |     |
| Pc_TC147462 | -1.09 | 0.38  |      | -0.65 | 0.64      |      | -4.67 | 0.03 | Down | -2.54 | 0.08  |      | Expressed protein                                      |     |
| Pc_TC147472 | 0.08  | 1     |      | -0.94 | 0.84      |      | 4.15  | 0    | Up   | 1.95  | 0.19  |      | putative unclassified                                  |     |
| Pc_TC147489 | -2.86 | 0.03  | Down | -0.3  | 0.83      |      | 1.23  | 0.33 |      | 0.46  | 0.66  |      | Expressed protein                                      |     |
| Pc_TC147508 | -3.68 | 0.01  | Down | 0     | 0         |      | 0     | 0    |      | 0     | 0     |      | Expressed protein                                      |     |
| Pc_TC147509 | -1.87 | 0.03  | Down | -1.55 | 0.1       |      | 0.99  | 0.37 |      | 0.64  | 0.42  |      | Expressed protein                                      |     |
| Pc_TC147515 | 0.53  | 0.39  |      | 1.12  | 0.1       |      | -2.98 | 0.02 | Down | -2.55 | 0     | Down | Expressed protein                                      |     |
| Pc_TC147528 | 5.12  | 0     | Up   | 0     | 1         |      | 3.31  | 0.19 |      | 2.43  | 0.39  |      | calmodulin-binding protein                             |     |
| Pc_TC147535 | -1.24 | 0.06  |      | -2.44 | 0         | Down | 0.29  | 0.78 |      | -0.92 | 0.22  |      | Flavin-binding monooxygenase family protein            |     |
| Pc_TC147544 | 2.11  | 0.02  | Up   | 1.72  | 0.11      |      | -2.08 | 0.28 |      | -0.5  | 0.76  |      | CTP synthase family protein                            |     |
| Pc_TC147545 | 0     | 0.01  |      | 1.1   | 0.29      |      | -4.58 | 0.03 | Down | -3.46 | 0.03  | Down | Reverse transcriptase (RNA-dependent DNA polymerase)   |     |
| Pc_TC147554 | 1.64  | 0.05  | Up   | 0     | 0.01      |      | 1.17  | 0.38 |      | 0.04  | 1     |      | Expressed protein                                      |     |
| Pc_TC147563 | 2.17  | 0.01  | Up   | 0     | 0.04      |      | 0.38  | 0.84 |      | -1.96 | 0.22  |      | Expressed protein                                      |     |
| Pc_TC147598 | -2.41 | 0.04  | Down | -1.43 | 0.22      |      | 0.25  | 0.87 |      | -0.14 | 0.92  |      | Expressed protein                                      |     |
| Pc_TC147603 | -0.13 | 0.98  |      | 0.06  | 1         |      | -4.4  | 0.05 | Down | -1.7  | 0.23  |      | Expressed protein                                      |     |
| Pc_TC147614 | 0.12  | 0.92  |      | 1.69  | 0.04      | Up   | -0.81 | 0.55 |      | -1.63 | 0.13  |      | Ribosomal protein L7Ae/L30e/S12e/Gadd45 family protein |     |
| Pc_TC147627 | -0.92 | 1     |      | 0     | 0.67      |      | -0.5  | 1    |      | 4.18  | 0     | Up   | cytochrome oxidase 2                                   |     |
| Pc_TC147632 | 1.63  | 0.01  | Up   | -0.11 | 0.91      |      | -1.93 | 0.12 |      | -1.57 | 0.08  |      | Expressed protein                                      |     |
| Pc_TC147642 | -0.7  | 0.66  |      | 0.56  | 0.69      |      | 2.56  | 0.05 | Up   | 1.71  | 0.1   |      | Putative reverse transcriptase                         |     |
| Pc_TC147663 | 2.25  | 0     | Up   | 2.42  | 0         | Up   | 0.16  | 0.91 |      | 1.61  | 0.04  | Up   | stress-inducible protein,putative                      | TPR |
| Pc_TC147664 | -2.88 | 0     | Down | -1.75 | 0.05      |      | -3.63 | 0.01 | Down | -2.92 | 0     | Down | stress-inducible protein,putative                      | TPR |
| Pc_TC147673 | 0     | 1     |      | 2.28  | 0.01      | Up   | -3.82 | 0.04 | Down | -4.7  | 0.01  | Down | Expressed protein                                      |     |
| Pc_TC147682 | -1.92 | 0.17  |      | -3.94 | 0.05      | Down | 0.31  | 0.86 |      | -0.2  | 0.91  |      | Putative wall-associated kinase 4                      |     |
| Pc_TC147726 | -3.29 | 0.01  | Down | -1.73 | 0.14      |      | -0.59 | 0.67 |      | -1.52 | 0.16  |      | Expressed protein                                      |     |
| Pc_TC147735 | 0.3   | 0.7   |      | 0.49  | 0.57      |      | -2.79 | 0.04 | Down | -1.6  | 0.09  |      | exocyst subunit exo70 family protein A2                |     |
| Pc_TC147744 | 2.13  | 0.01  | Up   | 0     | 0.02      |      | 0.94  | 0.51 |      | -2.18 | 0.15  |      | Ankyrin repeat family protein                          |     |
| Pc_TC147769 | 2.27  | 0     | Up   | 0     | 2.00E-005 |      | 2.01  | 0.07 |      | 0.1   | 0.93  |      | Expressed protein                                      |     |
| Pc_TC147771 | 0.2   | 0.73  |      | 0.69  | 0.3       |      | -2.24 | 0.05 |      | -1.88 | 0.02  | Down | Expressed protein                                      |     |
| Pc_TC147777 | 1.71  | 0     | Up   | 0     | 2.88E-010 |      | 1.34  | 0.18 |      | -0.33 | 0.64  |      | Ribosomal protein L18e/L15 superfamily protein         |     |
| Pc_TC147787 | 0.85  | 0.22  |      | 0.54  | 0.52      |      | 1.1   | 0.33 |      | 1.68  | 0.03  | Up   | Expressed protein                                      |     |
| Pc_TC147793 | 1.59  | 0.05  |      | 1.83  | 0.05      | Up   | 1.09  | 0.41 |      | 0.73  | 0.48  |      | Expressed protein                                      |     |
| Pc_TC147810 | 0.82  | 0.63  |      | 3.25  | 0         | Up   | -2.08 | 0.43 |      | 0     | 0.11  |      | Expressed protein                                      |     |
| Pc_TC147830 | 1.1   | 0.14  |      | 2.29  | 0         | Up   | -2.12 | 0.13 |      | -0.65 | 0.52  |      | Expressed protein                                      |     |
| Pc_TC147864 | 2.25  | 0.03  | Up   | 0     | 0.11      |      | 1.15  | 0.48 |      | 0.8   | 0.58  |      | Expressed protein                                      |     |
| Pc_TC147874 | 0.58  | 0.42  |      | 1.88  | 0.01      | Up   | -2.97 | 0.03 | Down | -0.53 | 0.56  |      | Expressed protein                                      |     |
| Pc_TC147876 | -1.92 | 0.1   |      | -0.62 | 0.61      |      | -5.08 | 0.01 | Down | -1.26 | 0.27  |      | Expressed protein                                      |     |
| Pc_TC147882 | 0.79  | 0.08  |      | 0.82  | 0.14      |      | -2.1  | 0.04 | Down | -0.69 | 0.29  |      | Uncharacterized                                        |     |
| Pc_TC147884 | 0.75  | 0.34  |      | 1.36  | 0.1       |      | -3.58 | 0.02 | Down | -0.6  | 0.55  |      | Expressed protein                                      |     |
| Pc_TC147893 | 3.6   | 0.01  | Up   | 0     | 0.67      |      | 3.26  | 0.09 |      | 2.21  | 0.26  |      | Expressed protein                                      |     |
| Pc_TC147910 | 0     | 0.31  |      | -0.94 | 0.84      |      | 3.57  | 0.02 | Up   | 2.15  | 0.13  |      | Expressed protein                                      |     |
| Pc_TC147911 | 0     | 1     |      | 2.64  | 0.36      |      | 5     | 0.01 | Up   | 3.21  | 0.15  |      | Expressed protein                                      |     |
| Pc_TC147912 | 0.21  | 0.74  |      | -0.15 | 0.85      |      | 2.29  | 0.03 | Up   | 0.89  | 0.21  |      | Surfeit protein isoform 1                              |     |
| Pc_TC147932 | 2.95  | 0     | Up   | 0     | 0.2       |      | 2.34  | 0.12 |      | -0.15 | 1     |      | Expressed protein                                      |     |
| Pc_TC147937 | 2     | 0     | Up   | 2.26  | 0         | Up   | -0.63 | 0.62 |      | -1.13 | 0.23  |      | MAR-binding protein                                    |     |
| Pc_TC147938 | -2.54 | 0     | Down | 0.02  | 0.99      |      | -1.61 | 0.14 |      | -3.61 | ##### | Down | Putative uncharacterized protein                       |     |
| Pc_TC147939 | 0.04  | 0.94  |      | 0.18  | 0.76      |      | -2.51 | 0.02 | Down | -1.53 | 0.02  | Down | Uncharacterized protein                                |     |

|             |       |       |      |  |       |           |      |       |           |      |       |       |      |                                                               |
|-------------|-------|-------|------|--|-------|-----------|------|-------|-----------|------|-------|-------|------|---------------------------------------------------------------|
| Pc_TC147942 | -2.24 | 0.23  |      |  | -1.26 | 0.5       |      | 2.96  | 0.02      | Up   | 1.3   | 0.26  |      | Expressed protein                                             |
| Pc_TC147945 | 1.68  | 0.02  | Up   |  | 0     | 0         |      | 2.26  | 0.04      | Up   | 0.5   | 0.58  |      | Expressed protein                                             |
| Pc_TC147955 | -0.37 | 0.73  |      |  | 0.26  | 0.82      |      | 1.66  | 0.17      |      | 2.06  | 0.01  | Up   | Expressed protein                                             |
| Pc_TC147958 | 0.02  | 1     |      |  | 0.52  | 0.53      |      | -3.56 | 0.01      | Down | -0.93 | 0.31  |      | Expressed protein                                             |
| Pc_TC147974 | 0.4   | 0.4   |      |  | 0.43  | 0.47      |      | -5.74 | 1.00E-005 | Down | -3.16 | ##### | Down | Expressed protein                                             |
| Pc_TC147981 | -2.29 | 0.04  | Down |  | -0.9  | 0.41      |      | 0.74  | 0.55      |      | 0.03  | 1     |      | Putative uncharacterized protein                              |
| Pc_TC148007 | 1.99  | 0.03  | Up   |  | 0     | 0.04      |      | 2.05  | 0.12      |      | 0.5   | 0.72  |      | Expressed protein                                             |
| Pc_TC148010 | 0.08  | 1     |      |  | 2.46  | 0.03      | Up   | 0     | 0.11      |      | -2.18 | 0.32  |      | Expressed protein                                             |
| Pc_TC148034 | -2.05 | 0     | Down |  | 0.53  | 0.45      |      | 0.15  | 0.9       |      | -0.12 | 0.88  |      | global transcription factor group A2                          |
| Pc_TC148055 | -0.64 | 0.52  |      |  | 0.84  | 0.37      |      | -0.84 | 0.55      |      | -2.86 | 0.02  | Down | Uncharacterized protein                                       |
| Pc_TC148066 | -1.36 | 0.27  |      |  | 1.57  | 0.1       |      | 0     | 0.01      |      | -3.62 | 0.02  | Down | Expressed protein                                             |
| Pc_TC148077 | 0.52  | 0.51  |      |  | 0.47  | 0.61      |      | -4.67 | 0.01      | Down | -1.37 | 0.18  |      | Expressed protein                                             |
| Pc_TC148084 | 0.57  | 0.2   |      |  | 1.08  | 0.04      | Up   | -1.17 | 0.24      |      | -0.62 | 0.33  |      | Expressed protein                                             |
| Pc_TC148100 | 0.33  | 0.73  |      |  | 0.61  | 0.55      |      | -2.03 | 0.18      |      | -2.75 | 0.03  | Down | Expressed protein                                             |
| Pc_TC148106 | -2.38 | 0.19  |      |  | -2.4  | 0.23      |      | 2.76  | 0.03      | Up   | 1.87  | 0.07  |      | Expressed protein                                             |
| Pc_TC148110 | 2     | 0.12  |      |  | 2.95  | 0.01      | Up   | -0.23 | 1         |      | 0.11  | 1     |      | Uncharacterized protein                                       |
| Pc_TC148121 | -1.14 | 0.26  |      |  | -0.23 | 0.86      |      | -2.98 | 0.06      |      | -2.6  | 0.03  | Down | Expressed protein                                             |
| Pc_TC148151 | 2     | 0.05  | Up   |  | 1.41  | 0.25      |      | 1.86  | 0.2       |      | 1.31  | 0.28  |      | Expressed protein                                             |
| Pc_TC148157 | 1.53  | ##### | Up   |  | -6.97 | 2.35E-016 | Down | 1.24  | 0.17      |      | -0.01 | 0.99  |      | Ribosomal protein S5/Elongation factor G/III/V family protein |
| Pc_TC148171 | -1.83 | 0.21  |      |  | 1.4   | 0.18      |      | -1.23 | 0.46      |      | -4.28 | 0.02  | Down | Expressed protein                                             |
| Pc_TC148183 | -1.06 | 0.19  |      |  | -1.26 | 0.18      |      | 2.32  | 0.03      | Up   | 0.79  | 0.32  |      | Expressed protein                                             |
| Pc_TC148187 | 2.46  | 0.01  | Up   |  | 1.75  | 0.14      |      | 1.86  | 0.2       |      | 1.98  | 0.07  |      | Expressed protein                                             |
| Pc_TC148188 | 2.89  | 0.02  | Up   |  | 1.06  | 0.62      |      | -0.17 | 1         |      | 1.63  | 0.31  |      | Putative uncharacterized protein P0534A03.125                 |
| Pc_TC148190 | -1.87 | 0.01  | Down |  | 0.13  | 0.88      |      | 0.5   | 0.65      |      | 0.46  | 0.55  |      | Expressed protein                                             |
| Pc_TC148198 | -4.47 | ##### | Down |  | -0.18 | 0.81      |      | -1.93 | 0.09      |      | -4.04 | ##### | Down | Expressed protein                                             |
| Pc_TC148254 | 0.18  | 0.54  |      |  | 0.13  | 0.72      |      | -1.55 | 0.07      |      | -1.22 | 0.01  | Down | Os01g0148500 protein                                          |
| Pc_TC148255 | 0.18  | 0.54  |      |  | 0.13  | 0.73      |      | -1.64 | 0.05      |      | -1.27 | 0.01  | Down | Putative uncharacterized protein Sb04g018075 (Fragment)       |
| Pc_TC148272 | 0.74  | 0.44  |      |  | 1.64  | 0.08      |      | 1.81  | 0.15      |      | 1.98  | 0.03  | Up   | Aldehyde dehydrogenase                                        |
| Pc_TC148275 | 0.27  | 0.54  |      |  | 0.1   | 0.86      |      | -3.18 | 0         | Down | -1.96 | 0     | Down | Expressed protein                                             |
| Pc_TC148281 | 2.25  | 0.03  | Up   |  | 0     | 0.11      |      | 2.77  | 0.04      | Up   | -0.37 | 0.89  |      | plant intracellular ras group-related LRR 6                   |
| Pc_TC148298 | 0.05  | 0.94  |      |  | -0.19 | 0.8       |      | -1.51 | 0.18      |      | -1.94 | 0.02  | Down | Expressed protein                                             |
| Pc_TC148342 | -1.12 | 0.31  |      |  | 1.29  | 0.16      |      | -4.02 | 0.03      | Down | -1.9  | 0.12  |      | Expressed protein                                             |
| Pc_TC148344 | 0.68  | 0.41  |      |  | 0.72  | 0.44      |      | -4.35 | 0.01      | Down | -2.43 | 0.04  | Down | Expressed protein                                             |
| Pc_TC148346 | 3.37  | ##### | Up   |  | 0     | 0.03      |      | 3.3   | 0.01      | Up   | 1.95  | 0.05  | Up   | Expressed protein                                             |
| Pc_TC148417 | -0.34 | 1     |      |  | 0.38  | 0.97      |      | 3.2   | 0.04      | Up   | 1.95  | 0.19  |      | Expressed protein                                             |
| Pc_TC148434 | 3.78  | 0.01  | Up   |  | 0     | 0.67      |      | 3.31  | 0.08      |      | 1.21  | 0.69  |      | Protein of unknown function DUF106,transmembrane              |
| Pc_TC148444 | 1.4   | 0.4   |      |  | 2.76  | 0.04      | Up   | 0     | 0.26      |      | -0.37 | 0.99  |      | Putative uncharacterized protein P0468B07.23                  |
| Pc_TC148451 | 2.4   | 0.19  |      |  | 3.38  | 0.04      | Up   | 1.31  | 0.68      |      | 1.21  | 0.69  |      | Expressed protein                                             |
| Pc_TC148461 | 0.31  | 0.49  |      |  | 0.14  | 0.8       |      | -1.89 | 0.06      |      | -1.62 | 0.01  | Down | Expressed protein                                             |
| Pc_TC148485 | 0.26  | 0.55  |      |  | -0.09 | 0.87      |      | -1.9  | 0.06      |      | -1.41 | 0.02  | Down | Expressed protein                                             |
| Pc_TC148486 | -1.44 | 0.24  |      |  | -0.18 | 0.93      |      | -3.82 | 0.04      | Down | -2.11 | 0.11  |      | Expressed protein                                             |
| Pc_TC148487 | 1.39  | 0.06  |      |  | 0.52  | 0.6       |      | 2.15  | 0.06      |      | 1.93  | 0.02  | Up   | Expressed protein                                             |
| Pc_TC148489 | 2.41  | 0     | Up   |  | 0     | 0.01      |      | 2.35  | 0.05      |      | -0.79 | 0.51  |      | heat shock protein 70B                                        |
| Pc_TC148498 | 1.3   | 0.35  |      |  | 0.28  | 0.97      |      | 3.2   | 0.02      | Up   | 1.63  | 0.22  |      | Expressed protein                                             |
| Pc_TC148531 | -1.51 | 0.21  |      |  | -3.33 | 0.04      | Down | 1.57  | 0.21      |      | 1.16  | 0.22  |      | Neutral lipase                                                |
| Pc_TC148532 | 3.94  | ##### | Up   |  | 0     | 0         |      | 2.06  | 0.08      |      | 0.6   | 0.54  |      | Expressed protein                                             |
| Pc_TC148567 | -1.95 | 0.03  | Down |  | -1.11 | 0.26      |      | -0.4  | 0.75      |      | -1.34 | 0.16  |      | Folate-sensitive fragile site protein Fra10Ac1                |
| Pc_TC148569 | -2.45 | 0.05  |      |  | -1.88 | 0.15      |      | -5.02 | 0.01      | Down | -2.09 | 0.09  |      | Ribosomal protein L16p/L10e family protein                    |
| Pc_TC148580 | 1.74  | 0.16  |      |  | 2.68  | 0.02      | Up   | -3.08 | 0.29      |      | -1.37 | 0.55  |      | Expressed protein                                             |
| Pc_TC148587 | 0.59  | 0.33  |      |  | 0.62  | 0.38      |      | -3.54 | 0.01      | Down | -0.36 | 0.64  |      | Expressed protein                                             |
| Pc_TC148592 | -0.97 | 0.31  |      |  | -0.46 | 0.67      |      | -1.63 | 0.24      |      | -2.83 | 0.02  | Down | Expressed protein                                             |
| Pc_TC148605 | -0.65 | 0.31  |      |  | -0.22 | 0.77      |      | 0.12  | 0.92      |      | -1.91 | 0.02  | Down | zinc finger (C3HC4-type RING finger) family protein           |
| Pc_TC148607 | -0.78 | 0.19  |      |  | -1.06 | 0.14      |      | 0.01  | 1         |      | -1.45 | 0.05  | Down | Expressed protein                                             |
| Pc_TC148608 | -1.27 | 0.03  | Down |  | -1.55 | 0.03      | Down | -0.63 | 0.54      |      | -0.76 | 0.27  |      | zinc finger (C3HC4-type RING finger) family protein           |
| Pc_TC148672 | 0.4   | 0.74  |      |  | 0.06  | 1         |      | 1.57  | 0.23      |      | 2.08  | 0.02  | Up   | Expressed protein                                             |
| Pc_TC148682 | 0.68  | 0.19  |      |  | 1.34  | 0.03      | Up   | -1.7  | 0.12      |      | -0.59 | 0.4   |      | Expressed protein                                             |
| Pc_TC148683 | -2.19 | 0.05  | Down |  | -3.8  | 0.01      | Down | -5.35 | 0.01      | Down | -2.65 | 0.03  | Down | Expressed protein                                             |
| Pc_TC148686 | -1.24 | 0.3   |      |  | -1.68 | 0.22      |      | -1.82 | 0.25      |      | -3.11 | 0.03  | Down | Expressed protein                                             |
| Pc_TC148688 | 2.35  | 0.03  | Up   |  | 0     | 0.2       |      | 1.44  | 0.4       |      | -0.37 | 0.93  |      | Expressed protein                                             |
| Pc_TC148738 | 2.99  | ##### | Up   |  | 0     | 0.01      |      | 2.42  | 0.05      |      | -0.65 | 0.62  |      | Expressed protein                                             |
| Pc_TC148740 | -0.26 | 0.72  |      |  | -0.15 | 0.86      |      | -0.9  | 0.43      |      | -1.73 | 0.04  | Down | Phospholipid/glycerol acyltransferase family protein          |
| Pc_TC148741 | 1.6   | 0.04  | Up   |  | 1.11  | 0.23      |      | -1.82 | 0.22      |      | -3.43 | 0.01  | Down | Expressed protein                                             |



|             |       |       |      |       |           |      |       |           |      |       |       |      |                                                          |
|-------------|-------|-------|------|-------|-----------|------|-------|-----------|------|-------|-------|------|----------------------------------------------------------|
| Pc_TC148743 | 1.83  | 0     | Up   | 2.15  | 0         | Up   | -0.86 | 0.48      |      | -2.56 | 0.01  | Down | Phospholipid/glycerol acyltransferase family protein     |
| Pc_TC148782 | 0.28  | 0.45  |      | 0.6   | 0.2       |      | -5.27 | 1.95E-006 | Down | -3.26 | ##### | Down | Expressed protein                                        |
| Pc_TC148783 | 1.19  | 0.4   |      | 2.8   | 0.02      | Up   | -1.08 | 0.68      |      | -1.96 | 0.4   |      | Expressed protein                                        |
| Pc_TC148784 | 0.64  | 0.48  |      | 1.99  | 0.02      | Up   | -5.02 | 0.01      | Down | -1.31 | 0.26  |      | Expressed protein                                        |
| Pc_TC148819 | -2.24 | 0.09  |      | -3.26 | 0.05      | Down | -0.57 | 0.71      |      | -2.37 | 0.08  |      | Expressed protein                                        |
| Pc_TC148821 | 0.17  | 0.85  |      | 0.33  | 0.72      |      | -3.96 | 0.01      | Down | -2.25 | 0.03  | Down | Expressed protein                                        |
| Pc_TC148832 | 3.25  | 0.03  | Up   | 2.76  | 0.13      |      | -0.5  | 1         |      | 1.43  | 0.58  |      | Expressed protein                                        |
| Pc_TC148841 | -3.45 | 0.02  | Down | 0.49  | 0.65      |      | -2.44 | 0.13      |      | -3.9  | 0.01  | Down | Peroxisomal membrane 22 kDa (Mpv17/PMP22) family protein |
| Pc_TC148856 | -0.24 | 0.87  |      | -1.09 | 0.4       |      | -4.82 | 0.02      | Down | -1.11 | 0.36  |      | Expressed protein                                        |
| Pc_TC148899 | 0.94  | 0.41  |      | 2.35  | 0.02      | Up   | -0.37 | 0.87      |      | 0.92  | 0.45  |      | 60S ribosomal protein L13                                |
| Pc_TC148919 | 3.89  | 0     | Up   | 0     | 0.67      |      | 1.96  | 0.42      |      | -1.37 | 0.88  |      | Expressed protein                                        |
| Pc_TC148932 | -0.44 | 0.54  |      | 0.44  | 0.57      |      | -2.73 | 0.03      | Down | -2.05 | 0.02  | Down | Expressed protein                                        |
| Pc_TC148939 | 1.72  | 0.02  | Up   | 0     | 0         |      | 1.2   | 0.33      |      | 0.53  | 0.6   |      | Expressed protein                                        |
| Pc_TC148990 | 2.61  | 0.02  | Up   | 3.29  | 0         | Up   | -0.5  | 0.91      |      | -0.37 | 0.96  |      | Expressed protein                                        |
| Pc_TC149003 | 0.08  | 1     |      | 0     | 0.36      |      | 3.53  | 0.02      | Up   | 1.08  | 0.57  |      | RING/U-box superfamily protein                           |
| Pc_TC149007 | -2.06 | 0.1   |      | -3.4  | 0.03      | Down | -1.79 | 0.25      |      | -0.25 | 0.85  |      | Expressed protein                                        |
| Pc_TC149021 | 0.5   | 0.37  |      | 1.33  | 0.04      | Up   | -5.3  | 0         | Down | -2.18 | 0.01  | Down | Expressed protein                                        |
| Pc_TC149024 | 2.22  | 0     | Up   | 0     | 0         |      | 2.02  | 0.09      |      | 1.19  | 0.2   |      | Uncharacterized protein                                  |
| Pc_TC149030 | 4.7   | ##### | Up   | 0     | 0.48      |      | 2.17  | 0.26      |      | 0.63  | 0.88  |      | Expressed protein                                        |
| Pc_TC149031 | 0.88  | 0.14  |      | 0.79  | 0.27      |      | -2.58 | 0.04      | Down | -1.21 | 0.13  |      | Putative uncharacterized protein                         |
| Pc_TC149039 | -0.03 | 0.97  |      | 0.39  | 0.56      |      | 0.55  | 0.59      |      | 1.35  | 0.04  | Up   | Expressed protein                                        |
| Pc_TC149042 | 1.69  | 0.04  | Up   | 1.06  | 0.31      |      | 0.83  | 0.55      |      | 1.74  | 0.06  |      | Expressed protein                                        |
| Pc_TC149062 | 0.89  | 0.02  |      | 0.84  | 0.07      |      | -2.73 | 0.01      | Down | -0.13 | 0.81  |      | Expressed protein                                        |
| Pc_TC149063 | 0.14  | 0.77  |      | 0.56  | 0.32      |      | -4.02 | 0         | Down | -1.18 | 0.07  |      | Cytochrome CYP6AB14                                      |
| Pc_TC149064 | 5.17  | ##### | Up   | 0     | 0.67      |      | 2.2   | 0.34      |      | 0     | 0.54  |      | Expressed protein                                        |
| Pc_TC149073 | -0.49 | 0.47  |      | -0.32 | 0.69      |      | 0.64  | 0.56      |      | -1.99 | 0.02  | Down | Expressed protein                                        |
| Pc_TC149106 | -1    | 0.27  |      | -0.67 | 0.51      |      | -3.74 | 0.02      | Down | -2.16 | 0.04  | Down | Expressed protein                                        |
| Pc_TC149117 | 1.25  | 0.22  |      | 2.03  | 0.05      | Up   | 0.62  | 0.7       |      | -0.15 | 0.97  |      | Mitochondrial substrate carrier family protein           |
| Pc_TC149120 | -0.14 | 1     |      | 2.98  | 0.01      | Up   | -1.3  | 0.58      |      | -2.18 | 0.32  |      | Aldolase superfamily protein                             |
| Pc_TC149131 | 1.95  | 0.24  |      | 0     | 0.48      |      | 3.44  | 0.04      | Up   | 0.63  | 0.88  |      | Expressed protein                                        |
| Pc_TC149132 | 0.66  | 0.81  |      | -0.36 | 1         |      | 4.67  | 0         | Up   | 3.71  | 0     | Up   | Expressed protein                                        |
| Pc_TC149139 | -1.01 | 0.43  |      | -0.44 | 0.77      |      | 2.53  | 0.04      | Up   | 1.24  | 0.21  |      | Expressed protein                                        |
| Pc_TC149146 | 1.7   | 0.02  | Up   | 0     | 0         |      | 1.09  | 0.38      |      | -0.22 | 0.86  |      | Expressed protein                                        |
| Pc_TC149148 | 1.43  | 0.2   |      | 2.47  | 0.02      | Up   | 0.66  | 0.72      |      | 0.46  | 0.79  |      | Uncharacterized protein                                  |
| Pc_TC149157 | -0.75 | 0.28  |      | 0.72  | 0.31      |      | -2.97 | 0.02      | Down | -1.85 | 0.03  | Down | Expressed protein                                        |
| Pc_TC149158 | 0.53  | 0.36  |      | 1.45  | 0.03      | Up   | -4.23 | 0         | Down | -1.45 | 0.06  |      | Expressed protein                                        |
| Pc_TC149159 | 0.47  | 0.29  |      | 0.53  | 0.34      |      | -2.72 | 0.01      | Down | -2.27 | 0     | Down | Expressed protein                                        |
| Pc_TC149168 | -1.27 | 0.07  |      | -0.54 | 0.49      |      | -1.84 | 0.12      |      | -2.12 | 0.01  | Down | Expressed protein                                        |
| Pc_TC149182 | 0.04  | 0.97  |      | 0.57  | 0.45      |      | -2.66 | 0.04      | Down | -1.87 | 0.03  | Down | Expressed protein                                        |
| Pc_TC149209 | 0.88  | 0.21  |      | 1.04  | 0.19      |      | -6.02 | 0         | Down | -1.31 | 0.17  |      | Expressed protein                                        |
| Pc_TC149217 | -0.56 | 0.7   |      | 1.11  | 0.32      |      | -3.3  | 0.1       |      | -4.18 | 0.03  | Down | Expressed protein                                        |
| Pc_TC149218 | 0.17  | 0.94  |      | 0.15  | 0.96      |      | 2.78  | 0.02      | Up   | 2.31  | 0.01  | Up   | Expressed protein                                        |
| Pc_TC149244 | -2.73 | 0.05  | Down | -0.63 | 0.62      |      | -1.43 | 0.35      |      | -0.37 | 0.77  |      | Expressed protein                                        |
| Pc_TC149248 | -0.21 | 0.88  |      | -0.01 | 1         |      | -1.63 | 0.28      |      | -2.83 | 0.04  | Down | Expressed protein                                        |
| Pc_TC149249 | 0.49  | 0.83  |      | 2.52  | 0.04      | Up   | 0.92  | 0.64      |      | 1.9   | 0.14  |      | Uncharacterized protein                                  |
| Pc_TC149250 | 4.21  | ##### | Up   | 0     | 0         |      | 2.67  | 0.02      | Up   | 1.28  | 0.14  |      | Expressed protein                                        |
| Pc_TC149275 | 2.74  | 0.05  | Up   | 2.17  | 0.21      |      | -0.08 | 1         |      | -0.96 | 0.86  |      | Expressed protein                                        |
| Pc_TC149295 | 0     | 1     |      | 1.06  | 0.98      |      | 4.41  | 0.03      | Up   | 2.8   | 0.26  |      | Expressed protein                                        |
| Pc_TC149324 | 1.76  | 0     | Up   | 0     | 1.23E-006 |      | 1.28  | 0.23      |      | 0.45  | 0.56  |      | Uncharacterized protein                                  |
| Pc_TC149348 | -0.76 | 0.41  |      | 0.46  | 0.63      |      | -3    | 0.05      | Down | -1.21 | 0.24  |      | Expressed protein                                        |
| Pc_TC149350 | 1.51  | 0.04  | Up   | 0     | 0         |      | 0.99  | 0.42      |      | -1.47 | 0.17  |      | AMP deaminase,putative / myoadenylate deaminase,putative |
| Pc_TC149381 | -3.45 | 0.02  | Down | -2.88 | 0.05      | Down | 0     | 0         |      | -2.9  | 0.03  | Down | Expressed protein                                        |
| Pc_TC149428 | -1.76 | 0     | Down | -2.46 | 0         | Down | 0.75  | 0.45      |      | -1.17 | 0.09  |      | Expressed protein                                        |
| Pc_TC149448 | -0.66 | 0.63  |      | -0.85 | 0.57      |      | 2.6   | 0.04      | Up   | 2.02  | 0.03  | Up   | Expressed protein                                        |
| Pc_TC149461 | -2.24 | 0.04  | Down | -0.33 | 0.78      |      | -1.94 | 0.18      |      | -1.19 | 0.26  |      | Expressed protein                                        |
| Pc_TC149493 | -1.97 | 0.07  |      | -0.8  | 0.47      |      | -0.65 | 0.64      |      | -2.43 | 0.04  | Down | Expressed protein                                        |
| Pc_TC149513 | -1.09 | 0.38  |      | -0.53 | 0.71      |      | 2.51  | 0.04      | Up   | -0.54 | 0.67  |      | Expressed protein                                        |
| Pc_TC149538 | -0.02 | 0.97  |      | 0.45  | 0.46      |      | -1.79 | 0.09      |      | -1.55 | 0.03  | Down | Putative uncharacterized protein Sb03g018841 (Fragment)  |
| Pc_TC149568 | 2.02  | 0.09  |      | 2.72  | 0.02      | Up   | 0     | 0.14      |      | -2.96 | 0.26  |      | Expressed protein                                        |
| Pc_TC149583 | -0.92 | 0.46  |      | 0.28  | 0.84      |      | -3.67 | 0.06      |      | -3.54 | 0.03  | Down | Expressed protein                                        |
| Pc_TC149587 | -3.73 | 0.05  | Down | -2.16 | 0.2       |      | -0.06 | 1         |      | -0.37 | 0.81  |      | Expressed protein                                        |
| Pc_TC149608 | -1.62 | 0     | Down | 0.07  | 0.91      |      | -0.52 | 0.6       |      | -0.13 | 0.84  |      | calcium-dependent protein kinase 13                      |

|             |       |       |      |       |           |      |       |      |      |       |      |      |                                                             |
|-------------|-------|-------|------|-------|-----------|------|-------|------|------|-------|------|------|-------------------------------------------------------------|
| Pc_TC149616 | 1.48  | 0.03  | Up   | 0     | 0         |      | 1.21  | 0.29 |      | -0.09 | 0.94 |      | phosphoglycerate kinase 1                                   |
| Pc_TC149627 | -1.28 | 0.02  | Down | -1.54 | 0.02      | Down | -1.58 | 0.13 |      | -2.1  | 0    | Down | cysteine-rich RLK (RECEPTOR-like protein kinase) 8          |
| Pc_TC149632 | -0.23 | 0.81  |      | 0.14  | 0.91      |      | 0     | 0    |      | -3.54 | 0    | Down | Expressed protein                                           |
| Pc_TC149634 | 0.9   | 0.13  |      | 1.01  | 0.14      |      | -3.27 | 0.01 | Down | -0.83 | 0.29 |      | Expressed protein                                           |
| Pc_TC149661 | 3.09  | 0     | Up   | 2.96  | 0         | Up   | -1.96 | 0.32 |      | 2.88  | 0    | Up   | Expressed protein                                           |
| Pc_TC149684 | 1.12  | 0.23  |      | 1.67  | 0.09      |      | -3.5  | 0.08 |      | -3.37 | 0.04 | Down | Expressed protein                                           |
| Pc_TC149698 | -2.24 | 0.06  |      | -3    | 0.04      | Down | -3.56 | 0.04 | Down | -5.02 | 0    | Down | Expressed protein                                           |
| Pc_TC149732 | 2.04  | 0.01  | Up   | 1.02  | 0.33      |      | 1.62  | 0.2  |      | 2.31  | 0.01 | Up   | Expressed protein                                           |
| Pc_TC149738 | -0.53 | 0.57  |      | -0.82 | 0.43      |      | 2.42  | 0.03 | Up   | 1.55  | 0.06 |      | RING finger and CHY zinc finger domain-containing protein 1 |
| Pc_TC149749 | 0.04  | 0.98  |      | 1.43  | 0.04      | Up   | -3.1  | 0.02 | Down | -3.39 | 0    | Down | Expressed protein                                           |
| Pc_TC149769 | -1.3  | 0.38  |      | -0.64 | 0.7       |      | -2.2  | 0.24 |      | -4.08 | 0.04 | Down | Expressed protein                                           |
| Pc_TC149786 | 2.52  | 0     | Up   | 0     | 0.04      |      | 1.8   | 0.18 |      | -0.26 | 0.9  |      | Expressed protein                                           |
| Pc_TC149809 | 0.84  | 0.44  |      | 2.88  | 0         | Up   | 0.33  | 0.87 |      | 0.09  | 1    |      | Ribosomal protein S24e family protein                       |
| Pc_TC149816 | -1.69 | 0.02  | Down | -0.71 | 0.38      |      | -1.85 | 0.12 |      | -0.54 | 0.5  |      | Expressed protein                                           |
| Pc_TC149842 | 3.17  | 0.04  | Up   | 1.06  | 0.8       |      | -0.5  | 1    |      | 3.15  | 0.05 | Up   | Expressed protein                                           |
| Pc_TC149847 | -0.92 | 0.48  |      | -1.13 | 0.44      |      | 0     | 0.01 |      | -3.37 | 0.04 | Down | Expressed protein                                           |
| Pc_TC149877 | -2.14 | 0.17  |      | -1.16 | 0.45      |      | -2.72 | 0.16 |      | -4.18 | 0.03 | Down | Expressed protein                                           |
| Pc_TC149879 | 3.97  | ##### | Up   | 0     | 0.2       |      | 3.11  | 0.03 | Up   | 2.36  | 0.05 | Up   | Expressed protein                                           |
| Pc_TC149885 | 0.08  | 0.94  |      | 0.46  | 0.59      |      | -5.14 | 0    | Down | -3.43 | 0    | Down | Expressed protein                                           |
| Pc_TC149904 | -2.51 | 0.03  | Down | -0.76 | 0.49      |      | -0.23 | 0.88 |      | 0.04  | 1    |      | Expressed protein                                           |
| Pc_TC149905 | 0.39  | 0.33  |      | 1.08  | 0.03      | Up   | -2.31 | 0.02 | Down | -1.52 | 0.01 | Down | Expressed protein                                           |
| Pc_TC149922 | 0.04  | 0.95  |      | -0.24 | 0.7       |      | 1.66  | 0.08 |      | 1.24  | 0.04 | Up   | Expressed protein                                           |
| Pc_TC149923 | 0.17  | 0.94  |      | 0.58  | 0.63      |      | -2.91 | 0.12 |      | -4.37 | 0.02 | Down | Expressed protein                                           |
| Pc_TC149958 | 0     | 0.64  |      | 1.38  | 0.65      |      | 3.59  | 0.05 | Up   | 2.33  | 0.22 |      | Expressed protein                                           |
| Pc_TC149963 | 1.55  | 0.07  |      | 2.29  | 0.01      | Up   | -0.88 | 0.58 |      | 0.75  | 0.49 |      | Expressed protein                                           |
| Pc_TC149976 | 2.57  | 0.01  | Up   | 0     | 0.11      |      | 0.9   | 0.61 |      | -1.37 | 0.47 |      | asparagine synthetase 3                                     |
| Pc_TC149979 | -0.61 | 0.54  |      | -0.89 | 0.43      |      | 2.64  | 0.02 | Up   | 0.79  | 0.39 |      | Expressed protein                                           |
| Pc_TC149984 | 0.68  | 0.16  |      | 0.66  | 0.27      |      | -2.11 | 0.05 | Down | -0.68 | 0.31 |      | Uncharacterized protein                                     |
| Pc_TC149989 | 2.19  | 0.16  |      | -0.53 | 1         |      | 3.2   | 0.06 |      | 2.85  | 0.05 | Up   | Expressed protein                                           |
| Pc_TC150001 | 1.92  | 0.09  |      | 3.18  | 0         | Up   | 0     | 0.11 |      | 1.34  | 0.31 |      | Expressed protein                                           |
| Pc_TC150007 | -0.87 | 0.4   |      | 0.73  | 0.45      |      | -4.25 | 0.02 | Down | -2.13 | 0.07 |      | Expressed protein                                           |
| Pc_TC150026 | -1.51 | 0.21  |      | -3.33 | 0.04      | Down | 0.2   | 0.91 |      | -2.18 | 0.09 |      | Expressed protein                                           |
| Pc_TC150029 | -3.83 | 0.04  | Down | -2.85 | 0.11      |      | 0     | 0.02 |      | 0     | 0.01 |      | Uncharacterized protein                                     |
| Pc_TC150030 | 1.58  | 0.04  | Up   | 0     | 0         |      | 2     | 0.09 |      | 0.85  | 0.37 |      | Expressed protein                                           |
| Pc_TC150039 | -0.92 | 0.39  |      | -0.07 | 1         |      | -2.5  | 0.11 |      | -3.37 | 0.02 | Down | Expressed protein                                           |
| Pc_TC150049 | 0.13  | 0.93  |      | 1.29  | 0.15      |      | -4.2  | 0.02 | Down | -0.83 | 0.45 |      | Expressed protein                                           |
| Pc_TC150052 | -2.34 | 0.03  | Down | -0.3  | 0.8       |      | -1.41 | 0.31 |      | -1.37 | 0.19 |      | Putative mutator-like transposase                           |
| Pc_TC150072 | 0.29  | 0.65  |      | 1.45  | 0.03      | Up   | -2.98 | 0.02 | Down | -1.59 | 0.05 |      | Expressed protein                                           |
| Pc_TC150081 | 0.46  | 0.66  |      | 0.06  | 1         |      | 1.69  | 0.17 |      | 2.16  | 0.01 | Up   | Expressed protein                                           |
| Pc_TC150096 | 2.51  | 0.03  | Up   | 1.98  | 0.16      |      | 1.83  | 0.28 |      | 2.92  | 0.01 | Up   | Expressed protein                                           |
| Pc_TC150123 | 1.08  | 0.77  |      | 4.23  | 0         | Up   | 2.75  | 0.18 |      | 1.43  | 0.58 |      | Expressed protein                                           |
| Pc_TC150141 | 1.84  | 0.01  | Up   | 0     | 0         |      | 1.59  | 0.18 |      | -0.96 | 0.36 |      | Uncharacterized protein                                     |
| Pc_TC150158 | -0.01 | 0.99  |      | -0.45 | 0.45      |      | 1.72  | 0.06 |      | 1.17  | 0.05 | Up   | Expressed protein                                           |
| Pc_TC150178 | 2.66  | 0.12  |      | 3.64  | 0.02      | Up   | 0     | 0.53 |      | 0     | 0.54 |      | Putative uncharacterized protein                            |
| Pc_TC150180 | -0.21 | 0.71  |      | 0.66  | 0.29      |      | -1.22 | 0.25 |      | -1.49 | 0.04 | Down | Expressed protein                                           |
| Pc_TC150182 | -2.34 | 0.03  | Down | -0.85 | 0.43      |      | -3.91 | 0.02 | Down | -1.79 | 0.1  |      | Expressed protein                                           |
| Pc_TC150189 | -0.06 | 0.96  |      | 1.74  | 0.02      | Up   | 0.4   | 0.73 |      | 0.29  | 0.74 |      | Expressed protein                                           |
| Pc_TC150201 | 0.93  | 0     |      | -9.95 | 7.24E-038 | Down | 0.98  | 0.24 |      | -0.35 | 0.49 |      | actin 3                                                     |
| Pc_TC150212 | 0     | 0.31  |      | -0.94 | 0.84      |      | 3.53  | 0.02 | Up   | 2.15  | 0.13 |      | Expressed protein                                           |
| Pc_TC150224 | 0.18  | 0.76  |      | 0.63  | 0.33      |      | -2.21 | 0.05 | Down | -1.43 | 0.05 |      | Expressed protein                                           |
| Pc_TC150237 | 0.12  | 0.84  |      | 0.34  | 0.6       |      | -2.03 | 0.07 |      | -2.02 | 0.01 | Down | Expressed protein                                           |
| Pc_TC150245 | -1.02 | 0.06  |      | -1.35 | 0.04      | Down | -0.1  | 0.92 |      | -0.5  | 0.45 |      | Expressed protein                                           |
| Pc_TC150251 | 2.12  | 0.04  | Up   | 1.52  | 0.23      |      | 1.93  | 0.19 |      | 1.95  | 0.09 |      | Expressed protein                                           |
| Pc_TC150270 | 3.08  | 0     | Up   | 0     | 0.07      |      | 2.39  | 0.08 |      | 1.16  | 0.33 |      | Expressed protein                                           |
| Pc_TC150279 | 2.66  | 0.01  | Up   | 0     | 0.2       |      | 2.05  | 0.19 |      | 0.36  | 0.91 |      | Expressed protein                                           |
| Pc_TC150298 | 5.23  | ##### | Up   | 0     | 0.67      |      | 3.67  | 0.04 | Up   | 0.63  | 0.96 |      | Expressed protein                                           |
| Pc_TC150319 | 3.89  | 0.04  | Up   | 0     | 1         |      | 2.67  | 0.36 |      | 0.63  | 1    |      | Expressed protein                                           |
| Pc_TC150334 | 1.94  | 0.04  | Up   | 2.06  | 0.05      | Up   | 3.12  | 0.01 | Up   | 3.22  | 0    | Up   | cytidine/deoxycytidylate deaminase family protein           |
| Pc_TC150335 | -1.8  | 0.29  |      | 1.35  | 0.24      |      | 2.66  | 0.04 | Up   | 2.17  | 0.03 | Up   | cytidine/deoxycytidylate deaminase family protein           |
| Pc_TC150342 | 0.56  | 0.82  |      | 0.74  | 0.74      |      | 3.27  | 0.03 | Up   | 2.51  | 0.04 | Up   | Expressed protein                                           |
| Pc_TC150356 | 1.08  | 0.77  |      | 0.06  | 1         |      | 3.79  | 0.03 | Up   | 2.21  | 0.26 |      | Expressed protein                                           |
| Pc_TC150362 | -0.17 | 0.84  |      | 0.01  | 1         |      | -2.13 | 0.1  |      | -2.18 | 0.02 | Down | Expressed protein                                           |

|             |       |       |      |       |           |      |  |       |      |      |       |      |      |                                                           |
|-------------|-------|-------|------|-------|-----------|------|--|-------|------|------|-------|------|------|-----------------------------------------------------------|
| Pc_TC150369 | 2.4   | 0.03  | Up   | 0     | 0.2       |      |  | 2.8   | 0.05 |      | 2.36  | 0.05 | Up   | NAD(P)-binding Rossmann-fold superfamily protein          |
| Pc_TC150371 | -3.09 | 0.04  | Down | 0     | 0.01      |      |  | -1.86 | 0.26 |      | -1.96 | 0.15 |      | Expressed protein                                         |
| Pc_TC150382 | 1.54  | 0.34  |      | 2.76  | 0.04      | Up   |  | -0.5  | 0.95 |      | 0.63  | 0.82 |      | Expressed protein                                         |
| Pc_TC150385 | 2.11  | 0.02  | Up   | 0     | 0.03      |      |  | 1.97  | 0.13 |      | 0.09  | 1    |      | Uncharacterized protein                                   |
| Pc_TC150397 | 0.84  | 0.3   |      | 0.37  | 0.72      |      |  | -3.77 | 0.02 | Down | -1.91 | 0.09 |      | Expressed protein                                         |
| Pc_TC150398 | -0.11 | 0.96  |      | -2.94 | 0.04      | Down |  | -2.76 | 0.09 |      | -1.26 | 0.27 |      | related to KPC1                                           |
| Pc_TC150427 | 1.04  | 0.23  |      | 1.96  | 0.03      | Up   |  | -2.82 | 0.1  |      | -3.11 | 0.03 | Down | Expressed protein                                         |
| Pc_TC150433 | -4.38 | 0.01  | Down | -0.23 | 0.88      |      |  | -0.1  | 0.97 |      | -0.08 | 0.98 |      | Uncharacterized protein                                   |
| Pc_TC150441 | 3.11  | 0     | Up   | 0     | 0.07      |      |  | 2.23  | 0.1  |      | 0     | 1    |      | Expressed protein                                         |
| Pc_TC150451 | 0.59  | 0.74  |      | -0.16 | 1         |      |  | 3.78  | 0    | Up   | 2.55  | 0.02 | Up   | Expressed protein                                         |
| Pc_TC150464 | 1.99  | 0.16  |      | 0.38  | 0.97      |      |  | 3.53  | 0.02 | Up   | 3.3   | 0.01 | Up   | Uncharacterized protein                                   |
| Pc_TC150478 | -1.34 | 0.04  | Down | -0.79 | 0.29      |      |  | 0.02  | 0.99 |      | -0.32 | 0.67 |      | Expressed protein                                         |
| Pc_TC150480 | -0.14 | 0.86  |      | 0.28  | 0.73      |      |  | 1.44  | 0.18 |      | 2.04  | 0    | Up   | glycoprotein glucosyltransferases                         |
| Pc_TC150481 | 1.09  | 0.05  | Up   | 1.67  | 0.01      | Up   |  | 0.55  | 0.6  |      | 1.8   | 0.01 | Up   | glycoprotein glucosyltransferases                         |
| Pc_TC150483 | 0.34  | 0.46  |      | 1.2   | 0.03      | Up   |  | 0.32  | 0.74 |      | 1.75  | 0    | Up   | glycoprotein glucosyltransferases                         |
| Pc_TC150484 | -2.07 | 0     | Down | 0.67  | 0.24      |      |  | 0.47  | 0.63 |      | 0.56  | 0.36 |      | glycoprotein glucosyltransferases                         |
| Pc_TC150485 | -0.37 | 0.31  |      | -1.61 | 0         | Down |  | -0.31 | 0.72 |      | -2.09 | 0    | Down | glycoprotein glucosyltransferases                         |
| Pc_TC150487 | -0.68 | 0.18  |      | -2.88 | 3.89E-005 | Down |  | 0.24  | 0.81 |      | -0.07 | 0.92 |      | glycoprotein glucosyltransferases                         |
| Pc_TC150550 | -3.09 | 0.04  | Down | 0.21  | 0.9       |      |  | -0.67 | 0.68 |      | -0.46 | 0.73 |      | Expressed protein                                         |
| Pc_TC150583 | -0.26 | 0.78  |      | 0.64  | 0.47      |      |  | -3.74 | 0.02 | Down | -1.45 | 0.15 |      | Expressed protein                                         |
| Pc_TC150584 | 3.72  | 0.01  | Up   | 0     | 0.67      |      |  | 2.59  | 0.22 |      | 0     | 0.54 |      | Expressed protein                                         |
| Pc_TC150602 | 2.45  | 0.02  | Up   | 0     | 0.2       |      |  | 2.5   | 0.09 |      | 0.5   | 0.82 |      | Expressed protein                                         |
| Pc_TC150603 | 0.21  | 0.68  |      | 1.22  | 0.04      | Up   |  | -3.02 | 0.01 | Down | -1.36 | 0.05 |      | Expressed protein                                         |
| Pc_TC150612 | 0.66  | 0.81  |      | 2.7   | 0.05      | Up   |  | 2.55  | 0.12 |      | 1.08  | 0.57 |      | Expressed protein                                         |
| Pc_TC150615 | -3.09 | 0.04  | Down | -2.11 | 0.16      |      |  | 0.46  | 0.76 |      | 0.16  | 0.93 |      | Expressed protein                                         |
| Pc_TC150628 | -1.04 | 0.04  | Down | -1.24 | 0.04      | Down |  | -2.25 | 0.03 | Down | -1.69 | 0.01 | Down | Expressed protein                                         |
| Pc_TC150629 | 0     | 0.06  |      | 2.47  | 0.02      | Up   |  | -2.67 | 0.25 |      | 0     | 0.04 |      | Expressed protein                                         |
| Pc_TC150645 | -1.57 | 0.18  |      | -2.82 | 0.06      |      |  | 2.54  | 0.03 | Up   | 0.81  | 0.41 |      | Uncharacterized protein                                   |
| Pc_TC150649 | -3.31 | 0.02  | Down | -0.43 | 0.75      |      |  | -0.13 | 0.96 |      | -1.45 | 0.24 |      | Expressed protein                                         |
| Pc_TC150681 | -0.29 | 0.82  |      | -3.4  | 0.03      | Down |  | 0.13  | 0.95 |      | 0     | 0    |      | Expressed protein                                         |
| Pc_TC150684 | -0.1  | 0.99  |      | -4.03 | 0.04      | Down |  | 1     | 0.46 |      | 0.24  | 0.87 |      | Expressed protein                                         |
| Pc_TC150691 | -1.76 | 0.06  |      | -0.61 | 0.53      |      |  | -2.02 | 0.13 |      | -1.99 | 0.05 | Down | Expressed protein                                         |
| Pc_TC150692 | 4.17  | 0.02  | Up   | 0     | 1         |      |  | 0.5   | 1    |      | 2.95  | 0.22 |      | regulatory particle triple-A ATPase 3                     |
| Pc_TC150698 | 0.61  | 0.45  |      | 0.26  | 0.81      |      |  | -3    | 0.05 | Down | -1.37 | 0.19 |      | Expressed protein                                         |
| Pc_TC150700 | -0.64 | 0.52  |      | 0.06  | 0.99      |      |  | -3.72 | 0.03 | Down | -1.18 | 0.28 |      | Expressed protein                                         |
| Pc_TC150708 | -2.55 | 0     | Down | 0.47  | 0.5       |      |  | -1.43 | 0.2  |      | -2.36 | 0    | Down | Uncharacterized protein                                   |
| Pc_TC150710 | 1.36  | 0.04  | Up   | -0.65 | 0.47      |      |  | 1.06  | 0.34 |      | 1.49  | 0.05 | Up   | Expressed protein                                         |
| Pc_TC150722 | 2.7   | 0     | Up   | 0     | 0.04      |      |  | 1.65  | 0.23 |      | 1.68  | 0.11 |      | Expressed protein                                         |
| Pc_TC150726 | -0.26 | 0.78  |      | -0.67 | 0.51      |      |  | -1.04 | 0.43 |      | -2.62 | 0.02 | Down | Expressed protein                                         |
| Pc_TC150738 | 0.33  | 0.34  |      | 0.49  | 0.27      |      |  | -2.32 | 0.01 | Down | -1.18 | 0.03 | Down | Expressed protein                                         |
| Pc_TC150745 | 2.3   | 0.04  | Up   | 0     | 0.2       |      |  | 0.5   | 0.85 |      | -1.96 | 0.4  |      | Ribosomal protein L27 family protein                      |
| Pc_TC150747 | 0.09  | 0.9   |      | -1.66 | 0.05      | Down |  | -1.66 | 0.15 |      | -0.92 | 0.25 |      | putative CACTA En/Spm sub-class                           |
| Pc_TC150759 | -1.36 | 0.27  |      | -0.87 | 0.51      |      |  | 0     | 0.01 |      | -4.62 | 0.01 | Down | Expressed protein                                         |
| Pc_TC150770 | 0.25  | 0.82  |      | 0.68  | 0.5       |      |  | -3.5  | 0.04 | Down | -1.64 | 0.17 |      | Expressed protein                                         |
| Pc_TC150797 | 3.47  | 0.02  | Up   | 0     | 0.67      |      |  | 2.09  | 0.38 |      | -0.37 | 1    |      | regulatory subunit Rpn7;Proteasome component (PCI) domain |
| Pc_TC150801 | -3.83 | 0.04  | Down | 0     | 0.02      |      |  | 0     | 0.02 |      | -4.28 | 0.02 | Down | HEAT SHOCK PROTEIN 81.4                                   |
| Pc_TC150804 | 1.08  | 0.77  |      | 3.45  | 0.03      | Up   |  | 0.5   | 1    |      | -0.37 | 1    |      | Expressed protein                                         |
| Pc_TC150824 | 1.86  | 0.1   |      | 3.23  | 0         | Up   |  | 0.16  | 1    |      | -0.01 | 1    |      | Expressed protein                                         |
| Pc_TC150842 | 4.4   | 0.01  | Up   | 0     | 1         |      |  | 3.41  | 0.17 |      | 3.33  | 0.12 |      | Expressed protein                                         |
| Pc_TC150845 | -1.73 | 0.16  |      | -1.75 | 0.19      |      |  | -0.89 | 0.56 |      | -3.18 | 0.03 | Down | Expressed protein                                         |
| Pc_TC150855 | -4.01 | 0.02  | Down | -0.33 | 0.84      |      |  | 1.48  | 0.25 |      | 0.29  | 0.83 |      | Expressed protein                                         |
| Pc_TC150860 | 1.4   | 0.3   |      | 0     | 0.2       |      |  | 2.9   | 0.05 | Up   | 1.29  | 0.37 |      | Expressed protein                                         |
| Pc_TC150872 | 0     | ##### |      | -4.19 | 0         | Down |  | -1.04 | 0.43 |      | -3.62 | 0    | Down | Expressed protein                                         |
| Pc_TC150893 | -4.04 | 0     | Down | 0.11  | 0.92      |      |  | 0.01  | 1    |      | -2.08 | 0.03 | Down | structural maintenance of chromosomes 6A                  |
| Pc_TC150909 | -2.15 | 0.02  | Down | -3.5  | 0         | Down |  | -0.84 | 0.5  |      | -1.29 | 0.17 |      | aldehyde dehydrogenase 2B4                                |
| Pc_TC150916 | 0.14  | 0.88  |      | -2.72 | 0.01      | Down |  | -0.08 | 0.96 |      | -0.57 | 0.53 |      | Expressed protein                                         |
| Pc_TC150954 | 0.46  | 0.26  |      | 0.6   | 0.24      |      |  | -2.45 | 0.01 | Down | -1.29 | 0.03 | Down | Glutathione reductase,cytosolic                           |
| Pc_TC150955 | 0.71  | 0.57  |      | 2.21  | 0.03      | Up   |  | 1.13  | 0.45 |      | 0.63  | 0.64 |      | Expressed protein                                         |
| Pc_TC150966 | 3.08  | 0.05  | Up   | 0     | 0.67      |      |  | 2.67  | 0.2  |      | 1.43  | 0.58 |      | Expressed protein                                         |
| Pc_TC150997 | 3.08  | 0.05  | Up   | 0     | 0.67      |      |  | 3.2   | 0.09 |      | 2.33  | 0.22 |      | Expressed protein                                         |
| Pc_TC151015 | 0.89  | 0.19  |      | 1.41  | 0.06      |      |  | -5.14 | 0    | Down | -5.02 | 0    | Down | Expressed protein                                         |
| Pc_TC151051 | 3.4   | 0.02  | Up   | 0     | 0.67      |      |  | 2.67  | 0.2  |      | -0.37 | 1    |      | Uncharacterized protein                                   |

|             |       |       |      |       |      |      |       |      |      |       |      |      |                                            |     |
|-------------|-------|-------|------|-------|------|------|-------|------|------|-------|------|------|--------------------------------------------|-----|
| Pc_TC151057 | 0.3   | 0.77  |      | 0.9   | 0.35 |      | -2.5  | 0.11 |      | -2.96 | 0.03 | Down | Expressed protein                          |     |
| Pc_TC151060 | -3.51 | 0.01  | Down | 0.33  | 0.78 |      | -2.76 | 0.09 |      | -1.5  | 0.2  |      | Expressed protein                          |     |
| Pc_TC151064 | 1.9   | 0.04  | Up   | 0     | 0.05 |      | 2.4   | 0.07 |      | -1.83 | 0.27 |      | Expressed protein                          |     |
| Pc_TC151098 | 2.89  | 0.03  | Up   | 0     | 0.48 |      | 2.73  | 0.12 |      | 0.85  | 0.76 |      | Expressed protein                          |     |
| Pc_TC151100 | -0.54 | 0.16  |      | -1.16 | 0.02 | Down | 1.28  | 0.14 |      | 0.48  | 0.37 |      | Expressed protein                          |     |
| Pc_TC151118 | 2.03  | 0     | Up   | 0     | 0    |      | 2.55  | 0.03 | Up   | 1.03  | 0.24 |      | Expressed protein                          |     |
| Pc_TC151161 | 0.95  | 0.54  |      | 2.56  | 0.03 | Up   | 0     | 0.14 |      | 0     | 0.11 |      | Expressed protein                          |     |
| Pc_TC151162 | 0.28  | 0.74  |      | -0.26 | 0.81 |      | 0.17  | 0.91 |      | 1.63  | 0.04 | Up   | uncharacterized protein                    |     |
| Pc_TC151185 | -0.69 | 0.59  |      | -0.71 | 0.62 |      | -2.26 | 0.19 |      | -4.46 | 0.01 | Down | Expressed protein                          |     |
| Pc_TC151190 | -0.34 | 1     |      | 2.92  | 0.03 | Up   | 0.67  | 0.82 |      | 0     | 0.24 |      | Expressed protein                          |     |
| Pc_TC151195 | 0.02  | 1     |      | 0     | 1    |      | -3.56 | 0.04 | Down | -2.21 | 0.07 |      | Protein phosphatase 2C family protein      |     |
| Pc_TC151198 | 0.89  | 0.37  |      | 2.15  | 0.02 | Up   | 0     | 0.01 |      | -1.57 | 0.25 |      | Expressed protein                          |     |
| Pc_TC151213 | -2.24 | 0.23  |      | 2.2   | 0.04 | Up   | -0.5  | 0.82 |      | -0.37 | 0.86 |      | PHD finger family protein                  |     |
| Pc_TC151221 | 2.82  | 0.04  | Up   | 0     | 0.48 |      | 2.31  | 0.22 |      | 0.04  | 1    |      | Expressed protein                          |     |
| Pc_TC151224 | 3.29  | ##### | Up   | 0     | 0.01 |      | 1.41  | 0.27 |      | 1.16  | 0.23 |      | Expressed protein                          |     |
| Pc_TC151255 | 0.27  | 0.86  |      | 1.16  | 0.29 |      | -3.3  | 0.1  |      | -4.18 | 0.03 | Down | Expressed protein                          |     |
| Pc_TC151282 | 1.32  | 0.02  | Up   | 0.04  | 0.97 |      | -0.2  | 0.86 |      | 0.16  | 0.84 |      | Os07g0641800 protein                       |     |
| Pc_TC151291 | 0.7   | 0.33  |      | 1.82  | 0.02 | Up   | -5.02 | 0    | Down | -1.73 | 0.08 |      | Expressed protein                          |     |
| Pc_TC151298 | 0.63  | 0.43  |      | 1.29  | 0.13 |      | -4.5  | 0.01 | Down | -0.17 | 0.89 |      | Expressed protein                          |     |
| Pc_TC151305 | -1.58 | 0.21  |      | 0.06  | 1    |      | -2.42 | 0.15 |      | -3.62 | 0.02 | Down | Expressed protein                          |     |
| Pc_TC151314 | 1.02  | 0.15  |      | 1.26  | 0.12 |      | 0.56  | 0.65 |      | 1.67  | 0.03 | Up   | Protein kinase superfamily protein         |     |
| Pc_TC151317 | 0.66  | 0.81  |      | 1.64  | 0.33 |      | 3.67  | 0.01 | Up   | 0.21  | 1    |      | Expressed protein                          |     |
| Pc_TC151339 | -3.04 | 0     | Down | -2.48 | 0.01 | Down | 0.24  | 0.83 |      | -0.2  | 0.8  |      | hAT transposon superfamily                 |     |
| Pc_TC151342 | -3.38 | 0.02  | Down | -0.49 | 0.7  |      | 1.21  | 0.34 |      | -1.13 | 0.34 |      | Expressed protein                          |     |
| Pc_TC151356 | -0.51 | 0.69  |      | -1.11 | 0.42 |      | 3.4   | 0    | Up   | 2.29  | 0.01 | Up   | Expressed protein                          |     |
| Pc_TC151405 | -1.04 | 0.48  |      | 0.06  | 1    |      | -0.61 | 0.74 |      | -4.08 | 0.04 | Down | Expressed protein                          |     |
| Pc_TC151439 | 0.15  | 0.93  |      | -0.87 | 0.49 |      | -3.89 | 0.04 | Down | -1.31 | 0.28 |      | Expressed protein                          |     |
| Pc_TC151463 | 0.08  | 1     |      | -3.26 | 0.16 |      | 2.66  | 0.05 | Up   | 0.83  | 0.52 |      | Expressed protein                          |     |
| Pc_TC151484 | -2.57 | 0.04  | Down | -1    | 0.4  |      | 0.74  | 0.57 |      | -0.32 | 0.79 |      | Expressed protein                          |     |
| Pc_TC151514 | -1.51 | 0.21  |      | -1.75 | 0.19 |      | 2.7   | 0.02 | Up   | 1.01  | 0.29 |      | Expressed protein                          |     |
| Pc_TC151520 | -1.22 | 0.11  |      | -2.05 | 0.03 | Down | -0.65 | 0.58 |      | -4.16 | 0    | Down | Expressed protein                          |     |
| Pc_TC151538 | 0.34  | 0.85  |      | 2.64  | 0.01 | Up   | 0     | 0.05 |      | -1.7  | 0.32 |      | Expressed protein                          |     |
| Pc_TC151539 | 3.5   | ##### | Up   | 0     | 0.11 |      | 2.83  | 0.04 | Up   | -0.05 | 1    |      | cold shock domain protein 1                | CSD |
| Pc_TC151541 | -0.64 | 0.52  |      | 0.25  | 0.83 |      | 0     | 0    |      | -3.6  | 0.01 | Down | Expressed protein                          |     |
| Pc_TC151552 | -1.57 | 0.01  | Down | -0.09 | 0.9  |      | -0.25 | 0.81 |      | -0.37 | 0.59 |      | Uncharacterized protein                    |     |
| Pc_TC151554 | -1.55 | 0.03  | Down | 0     | 1    |      | -3.17 | 0.01 | Down | -0.59 | 0.45 |      | Uncharacterized protein                    |     |
| Pc_TC151557 | 3.72  | ##### | Up   | 0     | 0.2  |      | 1.56  | 0.35 |      | 0.95  | 0.55 |      | Expressed protein                          |     |
| Pc_TC151565 | -3.73 | 0.05  | Down | -0.75 | 0.63 |      | 0.16  | 0.96 |      | -0.18 | 0.94 |      | Os05g0380700 protein                       |     |
| Pc_TC151573 | -0.65 | 0.33  |      | -0.79 | 0.31 |      | 2.15  | 0.04 | Up   | 1.48  | 0.03 | Up   | unknown protein                            |     |
| Pc_TC151574 | -1.04 | 0.08  |      | -2.24 | 0    | Down | 1.29  | 0.19 |      | -0.17 | 0.81 |      | unknown protein                            |     |
| Pc_TC151576 | 0.45  | 0.55  |      | 1.04  | 0.2  |      | -2.79 | 0.05 | Down | -0.98 | 0.3  |      | Expressed protein                          |     |
| Pc_TC151583 | -0.23 | 0.75  |      | 0.8   | 0.27 |      | -2.08 | 0.09 |      | -2.37 | 0.01 | Down | Expressed protein                          |     |
| Pc_TC151606 | 2.35  | 0.03  | Up   | 2.6   | 0.03 | Up   | 0     | 0.14 |      | -0.96 | 0.68 |      | Expressed protein                          |     |
| Pc_TC151635 | 0.08  | 1     |      | 2.76  | 0.04 | Up   | 0.09  | 1    |      | -1.37 | 0.66 |      | Nascent polypeptide-associated complex NAC |     |
| Pc_TC151646 | 3.89  | 0     | Up   | 0     | 0.67 |      | 2.96  | 0.14 |      | 0.63  | 0.96 |      | Expressed protein                          |     |
| Pc_TC151648 | 1.08  | 0.35  |      | -0.26 | 0.94 |      | 1.96  | 0.16 |      | 2.23  | 0.03 | Up   | Expressed protein                          |     |
| Pc_TC151650 | 1.12  | 0.22  |      | 2.4   | 0.01 | Up   | 0.32  | 0.85 |      | 1.15  | 0.25 |      | Expressed protein                          |     |
| Pc_TC151660 | -2.51 | 0.05  | Down | -1.53 | 0.22 |      | 0.31  | 0.84 |      | 0.13  | 0.94 |      | Expressed protein                          |     |
| Pc_TC151673 | -0.61 | 0.39  |      | 0.69  | 0.35 |      | -4.85 | 0    | Down | -1.52 | 0.07 |      | Expressed protein                          |     |
| Pc_TC151685 | 1.09  | 0.11  |      | 1.07  | 0.18 |      | -3.73 | 0.01 | Down | -0.76 | 0.41 |      | Expressed protein                          |     |
| Pc_TC151699 | -0.34 | 0.83  |      | 0.92  | 0.41 |      | -4.5  | 0.04 | Down | -1.79 | 0.2  |      | Uncharacterized protein                    |     |
| Pc_TC151701 | 0.93  | 0.6   |      | 0     | 0.27 |      | 3.09  | 0.04 | Up   | 2     | 0.13 |      | Expressed protein                          |     |
| Pc_TC151706 | 0     | ##### |      | -4.11 | 0    | Down | -1.27 | 0.34 |      | -5.54 | 0    | Down | Expressed protein                          |     |
| Pc_TC151740 | 0.66  | 0.81  |      | 0.06  | 1    |      | 3.26  | 0.04 | Up   | 2.91  | 0.02 | Up   | Expressed protein                          |     |
| Pc_TC151742 | -1.1  | 0.04  | Down | -1.23 | 0.05 |      | 0.59  | 0.54 |      | -0.3  | 0.64 |      | Expressed protein                          |     |
| Pc_TC151752 | -0.34 | 0.46  |      | -0.09 | 0.88 |      | -0.54 | 0.58 |      | -1.38 | 0.03 | Down | Expressed protein                          |     |
| Pc_TC151773 | 2.5   | ##### | Up   | 0     | 0    |      | 2.06  | 0.07 |      | 1.2   | 0.14 |      | Expressed protein                          |     |
| Pc_TC151795 | -2.12 | 0.02  | Down | -4.72 | 0    | Down | 0.89  | 0.43 |      | -0.7  | 0.43 |      | Expressed protein                          |     |
| Pc_TC151836 | 0.37  | 0.85  |      | 2.17  | 0.05 | Up   | -2.08 | 0.34 |      | -0.09 | 1    |      | Expressed protein                          |     |
| Pc_TC151847 | -3.92 | 0.03  | Down | -0.04 | 1    |      | -0.59 | 0.73 |      | -0.79 | 0.55 |      | Expressed protein                          |     |
| Pc_TC151858 | 2.46  | 0.04  | Up   | 0     | 0.27 |      | 2.14  | 0.19 |      | -0.7  | 0.83 |      | Expressed protein                          |     |
| Pc_TC151931 | 0.72  | 0.36  |      | 1.55  | 0.06 |      | -3.5  | 0.03 | Down | -1.79 | 0.1  |      | Expressed protein                          |     |

|             |       |      |      |       |           |      |       |      |      |       |      |      |                                                         |
|-------------|-------|------|------|-------|-----------|------|-------|------|------|-------|------|------|---------------------------------------------------------|
| Pc_TC151943 | 0.32  | 0.52 |      | 0.79  | 0.18      |      | -4.42 | 0    | Down | -2.4  | 0    | Down | Expressed protein                                       |
| Pc_TC151947 | -3.57 | 0.01 | Down | -1.78 | 0.16      |      | -1.14 | 0.43 |      | -0.26 | 0.83 |      | Transcription factor E75B                               |
| Pc_TC151948 | 3.29  | 0    | Up   | 0     | 0.36      |      | 3.15  | 0.04 | Up   | -1.37 | 0.66 |      | Expressed protein                                       |
| Pc_TC151951 | -0.77 | 0.45 |      | -0.37 | 0.76      |      | -3.25 | 0.05 | Down | -2.13 | 0.07 |      | Expressed protein                                       |
| Pc_TC151957 | 0.16  | 0.78 |      | 0.27  | 0.68      |      | -3.25 | 0.01 | Down | -1.24 | 0.09 |      | Expressed protein                                       |
| Pc_TC151963 | 2.72  | 0    | Up   | 0     | 0.01      |      | 2.59  | 0.03 | Up   | 1.6   | 0.09 |      | Thiolase family protein                                 |
| Pc_TC151988 | 0.39  | 0.71 |      | 0.71  | 0.5       |      | -2.89 | 0.09 |      | -2.77 | 0.04 | Down | Uncharacterized protein                                 |
| Pc_TC152011 | 0.02  | 1    |      | -0.13 | 0.94      |      | -3.08 | 0.06 |      | -3.96 | 0.01 | Down | Expressed protein                                       |
| Pc_TC152024 | 0.92  | 0.27 |      | 1.25  | 0.17      |      | -2.5  | 0.11 |      | -2.96 | 0.03 | Down | Expressed protein                                       |
| Pc_TC152025 | 1.01  | 0.1  |      | 1.23  | 0.08      |      | -3.12 | 0.02 | Down | 0.14  | 0.87 |      | Putative uncharacterized protein Sb08g019200            |
| Pc_TC152029 | -2.66 | 0    | Down | 0.32  | 0.7       |      | 0.39  | 0.74 |      | -1.53 | 0.09 |      | Putative uncharacterized protein Sb08g019200            |
| Pc_TC152059 | 0.1   | 0.9  |      | 1.25  | 0.08      |      | -3.3  | 0.01 | Down | -1.47 | 0.08 |      | Expressed protein                                       |
| Pc_TC152068 | 1.46  | 0.01 | Up   | 0     | 4.27E-009 |      | 1.33  | 0.19 |      | 0.03  | 0.98 |      | cytochrome P450, family 711, subfamily A, polypeptide 1 |
| Pc_TC152071 | 0.43  | 0.63 |      | 0.24  | 0.83      |      | -3.35 | 0.04 | Down | -0.71 | 0.5  |      | Expressed protein                                       |
| Pc_TC152104 | -4.38 | 0.01 | Down | -1.4  | 0.28      |      | 0.29  | 0.85 |      | -0.31 | 0.81 |      | Expressed protein                                       |
| Pc_TC152109 | -0.2  | 0.79 |      | -0.25 | 0.77      |      | -2.52 | 0.05 | Down | -1.36 | 0.11 |      | Expressed protein                                       |
| Pc_TC152137 | 2.66  | 0.03 | Up   | 0     | 0.36      |      | 1.5   | 0.45 |      | 1.63  | 0.31 |      | Expressed protein                                       |
| Pc_TC152140 | -0.41 | 0.74 |      | -0.75 | 0.56      |      | 3.05  | 0.01 | Up   | 1.36  | 0.14 |      | Expressed protein                                       |
| Pc_TC152170 | -0.66 | 0.72 |      | -1.26 | 0.5       |      | 2.62  | 0.05 | Up   | 1.3   | 0.26 |      | Expressed protein                                       |
| Pc_TC152191 | -1.04 | 0.2  |      | -1.55 | 0.11      |      | 2.35  | 0.03 | Up   | 0.92  | 0.24 |      | Expressed protein                                       |
| Pc_TC152198 | -0.45 | 0.67 |      | 2.03  | 0.02      | Up   | -1.74 | 0.24 |      | -0.27 | 0.82 |      | gag protein                                             |
| Pc_TC152200 | 1.1   | 0.04 | Up   | -0.1  | 0.89      |      | 0.21  | 0.85 |      | 0.86  | 0.21 |      | gag protein                                             |
| Pc_TC152215 | 0.49  | 0.83 |      | -0.94 | 0.74      |      | 2.09  | 0.18 |      | 2.5   | 0.03 | Up   | Uncharacterized protein                                 |
| Pc_TC152220 | -1.39 | 0.06 |      | -0.26 | 0.75      |      | -2.43 | 0.05 |      | -3    | 0    | Down | Expressed protein                                       |
| Pc_TC152248 | 1.68  | 0.02 | Up   | 0     | 0         |      | 1.3   | 0.28 |      | 0.31  | 0.77 |      | Expressed protein                                       |
| Pc_TC152268 | 0.49  | 0.76 |      | 2.64  | 0.01      | Up   | -1.67 | 0.43 |      | -1.22 | 0.49 |      | Expressed protein                                       |
| Pc_TC152331 | -0.26 | 0.5  |      | -1.36 | 0.01      | Down | 1.45  | 0.09 |      | 0.68  | 0.21 |      | Expressed protein                                       |
| Pc_TC152341 | 1.08  | 0.57 |      | 3.01  | 0.02      | Up   | 0     | 0.26 |      | -1.37 | 0.66 |      | Expressed protein                                       |
| Pc_TC152343 | 0.7   | 0.42 |      | 0.52  | 0.62      |      | -3.5  | 0.04 | Down | -1.64 | 0.17 |      | Expressed protein                                       |
| Pc_TC152347 | -0.81 | 0.13 |      | -1.43 | 0.03      | Down | 1.39  | 0.15 |      | 0.14  | 0.84 |      | Putative lipase-like protein                            |
| Pc_TC152353 | 3.27  | 0    | Up   | 0     | 0.2       |      | 0.24  | 0.98 |      | 0.04  | 1    |      | Expressed protein                                       |
| Pc_TC152362 | -2.28 | 0.02 | Down | -1.71 | 0.1       |      | 1.87  | 0.1  |      | -0.48 | 0.61 |      | Expressed protein                                       |
| Pc_TC152365 | 0.76  | 0.12 |      | 0.88  | 0.13      |      | -2.74 | 0.01 | Down | -1.13 | 0.1  |      | Expressed protein                                       |
| Pc_TC152366 | 0.71  | 0.15 |      | 1.07  | 0.07      |      | -2.44 | 0.03 | Down | -0.87 | 0.21 |      | Expressed protein                                       |
| Pc_TC152367 | 0.55  | 0.26 |      | 0.84  | 0.15      |      | -2.82 | 0.01 | Down | -1.12 | 0.1  |      | Expressed protein                                       |
